# Supplementary material for: Selective inhibition reveals the regulatory function of DYRK2 in protein synthesis and calcium entry
Source: eLife journal article supplement (doi:10.7554/elife.77696), 2022-04-19
Supplement: fig2-data1 [file Figure 2-source data 1 Raw data of C17 Kinome profiling list for Figure 2C.xlsx]

## Sheet: Sheet1
Compound Name	DiscoveRx Gene Symbol	Percent Control	Compound Concentration (nM)
C17	AAK1	90	500
C17	ABL1(E255K)-phosphorylated	79	500
C17	ABL1(F317I)-nonphosphorylated	98	500
C17	ABL1(F317I)-phosphorylated	88	500
C17	ABL1(F317L)-nonphosphorylated	96	500
C17	ABL1(F317L)-phosphorylated	100	500
C17	ABL1(H396P)-nonphosphorylated	80	500
C17	ABL1(H396P)-phosphorylated	78	500
C17	ABL1(M351T)-phosphorylated	91	500
C17	ABL1(Q252H)-nonphosphorylated	89	500
C17	ABL1(Q252H)-phosphorylated	88	500
C17	ABL1(T315I)-nonphosphorylated	88	500
C17	ABL1(T315I)-phosphorylated	95	500
C17	ABL1(Y253F)-phosphorylated	86	500
C17	ABL1-nonphosphorylated	65	500
C17	ABL1-phosphorylated	70	500
C17	ABL2	88	500
C17	ACVR1	71	500
C17	ACVR1B	89	500
C17	ACVR2A	76	500
C17	ACVR2B	100	500
C17	ACVRL1	99	500
C17	ADCK3	100	500
C17	ADCK4	91	500
C17	AKT1	100	500
C17	AKT2	96	500
C17	AKT3	91	500
C17	ALK	66	500
C17	ALK(C1156Y)	97	500
C17	ALK(L1196M)	89	500
C17	AMPK-alpha1	86	500
C17	AMPK-alpha2	94	500
C17	ANKK1	96	500
C17	ARK5	97	500
C17	ASK1	83	500
C17	ASK2	64	500
C17	AURKA	75	500
C17	AURKB	89	500
C17	AURKC	78	500
C17	AXL	98	500
C17	BIKE	37	500
C17	BLK	98	500
C17	BMPR1A	91	500
C17	BMPR1B	100	500
C17	BMPR2	100	500
C17	BMX	90	500
C17	BRAF	99	500
C17	BRAF(V600E)	100	500
C17	BRK	86	500
C17	BRSK1	70	500
C17	BRSK2	94	500
C17	BTK	65	500
C17	BUB1	82	500
C17	CAMK1	99	500
C17	CAMK1B	69	500
C17	CAMK1D	98	500
C17	CAMK1G	98	500
C17	CAMK2A	93	500
C17	CAMK2B	80	500
C17	CAMK2D	100	500
C17	CAMK2G	96	500
C17	CAMK4	100	500
C17	CAMKK1	94	500
C17	CAMKK2	88	500
C17	CASK	99	500
C17	CDC2L1	98	500
C17	CDC2L2	100	500
C17	CDC2L5	100	500
C17	CDK11	61	500
C17	CDK2	100	500
C17	CDK3	100	500
C17	CDK4	87	500
C17	CDK4-cyclinD1	93	500
C17	CDK4-cyclinD3	99	500
C17	CDK5	94	500
C17	CDK7	77	500
C17	CDK8	48	500
C17	CDK9	91	500
C17	CDKL1	82	500
C17	CDKL2	89	500
C17	CDKL3	87	500
C17	CDKL5	97	500
C17	CHEK1	86	500
C17	CHEK2	89	500
C17	CIT	93	500
C17	CLK1	63	500
C17	CLK2	100	500
C17	CLK3	99	500
C17	CLK4	40	500
C17	CSF1R	92	500
C17	CSF1R-autoinhibited	100	500
C17	CSK	90	500
C17	CSNK1A1	89	500
C17	CSNK1A1L	93	500
C17	CSNK1D	91	500
C17	CSNK1E	83	500
C17	CSNK1G1	97	500
C17	CSNK1G2	89	500
C17	CSNK1G3	100	500
C17	CSNK2A1	26	500
C17	CSNK2A2	26	500
C17	CTK	100	500
C17	DAPK1	87	500
C17	DAPK2	80	500
C17	DAPK3	85	500
C17	DCAMKL1	71	500
C17	DCAMKL2	100	500
C17	DCAMKL3	75	500
C17	DDR1	92	500
C17	DDR2	92	500
C17	DLK	87	500
C17	DMPK	83	500
C17	DMPK2	99	500
C17	DRAK1	98	500
C17	DRAK2	100	500
C17	DYRK1A	6.5	500
C17	DYRK1B	48	500
C17	DYRK2	0	500
C17	EGFR	77	500
C17	EGFR(E746-A750del)	89	500
C17	EGFR(G719C)	100	500
C17	EGFR(G719S)	100	500
C17	EGFR(L747-E749del, A750P)	70	500
C17	EGFR(L747-S752del, P753S)	100	500
C17	EGFR(L747-T751del,Sins)	97	500
C17	EGFR(L858R)	77	500
C17	EGFR(L858R,T790M)	90	500
C17	EGFR(L861Q)	100	500
C17	EGFR(S752-I759del)	94	500
C17	EGFR(T790M)	79	500
C17	EIF2AK1	96	500
C17	EPHA1	93	500
C17	EPHA2	96	500
C17	EPHA3	85	500
C17	EPHA4	97	500
C17	EPHA5	97	500
C17	EPHA6	81	500
C17	EPHA7	89	500
C17	EPHA8	89	500
C17	EPHB1	92	500
C17	EPHB2	100	500
C17	EPHB3	96	500
C17	EPHB4	92	500
C17	EPHB6	57	500
C17	ERBB2	100	500
C17	ERBB3	100	500
C17	ERBB4	87	500
C17	ERK1	91	500
C17	ERK2	97	500
C17	ERK3	100	500
C17	ERK4	94	500
C17	ERK5	100	500
C17	ERK8	98	500
C17	ERN1	87	500
C17	FAK	81	500
C17	FER	100	500
C17	FES	84	500
C17	FGFR1	99	500
C17	FGFR2	100	500
C17	FGFR3	100	500
C17	FGFR3(G697C)	92	500
C17	FGFR4	87	500
C17	FGR	90	500
C17	FLT1	46	500
C17	FLT3	100	500
C17	FLT3(D835H)	86	500
C17	FLT3(D835V)	71	500
C17	FLT3(D835Y)	91	500
C17	FLT3(ITD)	84	500
C17	FLT3(ITD,D835V)	89	500
C17	FLT3(ITD,F691L)	99	500
C17	FLT3(K663Q)	93	500
C17	FLT3(N841I)	63	500
C17	FLT3(R834Q)	59	500
C17	FLT3-autoinhibited	100	500
C17	FLT4	95	500
C17	FRK	89	500
C17	FYN	99	500
C17	GAK	94	500
C17	GCN2(Kin.Dom.2,S808G)	97	500
C17	GRK1	86	500
C17	GRK2	98	500
C17	GRK3	89	500
C17	GRK4	90	500
C17	GRK7	85	500
C17	GSK3A	93	500
C17	GSK3B	96	500
C17	HASPIN	0	500
C17	HCK	94	500
C17	HIPK1	66	500
C17	HIPK2	85	500
C17	HIPK3	75	500
C17	HIPK4	100	500
C17	HPK1	100	500
C17	HUNK	93	500
C17	ICK	93	500
C17	IGF1R	93	500
C17	IKK-alpha	60	500
C17	IKK-beta	70	500
C17	IKK-epsilon	100	500
C17	INSR	82	500
C17	INSRR	100	500
C17	IRAK1	94	500
C17	IRAK3	68	500
C17	IRAK4	8.7	500
C17	ITK	91	500
C17	JAK1(JH1domain-catalytic)	100	500
C17	JAK1(JH2domain-pseudokinase)	68	500
C17	JAK2(JH1domain-catalytic)	91	500
C17	JAK3(JH1domain-catalytic)	84	500
C17	JNK1	90	500
C17	JNK2	92	500
C17	JNK3	93	500
C17	KIT	82	500
C17	KIT(A829P)	95	500
C17	KIT(D816H)	72	500
C17	KIT(D816V)	100	500
C17	KIT(L576P)	80	500
C17	KIT(V559D)	84	500
C17	KIT(V559D,T670I)	90	500
C17	KIT(V559D,V654A)	100	500
C17	KIT-autoinhibited	100	500
C17	LATS1	69	500
C17	LATS2	80	500
C17	LCK	100	500
C17	LIMK1	75	500
C17	LIMK2	97	500
C17	LKB1	80	500
C17	LOK	93	500
C17	LRRK2	100	500
C17	LRRK2(G2019S)	100	500
C17	LTK	92	500
C17	LYN	100	500
C17	LZK	68	500
C17	MAK	77	500
C17	MAP3K1	86	500
C17	MAP3K15	93	500
C17	MAP3K2	96	500
C17	MAP3K3	78	500
C17	MAP3K4	89	500
C17	MAP4K2	89	500
C17	MAP4K3	97	500
C17	MAP4K4	100	500
C17	MAP4K5	100	500
C17	MAPKAPK2	100	500
C17	MAPKAPK5	87	500
C17	MARK1	94	500
C17	MARK2	81	500
C17	MARK3	0	500
C17	MARK4	100	500
C17	MAST1	78	500
C17	MEK1	77	500
C17	MEK2	74	500
C17	MEK3	96	500
C17	MEK4	100	500
C17	MEK5	100	500
C17	MEK6	100	500
C17	MELK	91	500
C17	MERTK	92	500
C17	MET	86	500
C17	MET(M1250T)	99	500
C17	MET(Y1235D)	100	500
C17	MINK	84	500
C17	MKK7	82	500
C17	MKNK1	77	500
C17	MKNK2	79	500
C17	MLCK	85	500
C17	MLK1	95	500
C17	MLK2	94	500
C17	MLK3	100	500
C17	MRCKA	80	500
C17	MRCKB	80	500
C17	MST1	94	500
C17	MST1R	87	500
C17	MST2	81	500
C17	MST3	79	500
C17	MST4	80	500
C17	MTOR	100	500
C17	MUSK	100	500
C17	MYLK	95	500
C17	MYLK2	87	500
C17	MYLK4	100	500
C17	MYO3A	100	500
C17	MYO3B	83	500
C17	NDR1	95	500
C17	NDR2	54	500
C17	NEK1	94	500
C17	NEK10	100	500
C17	NEK11	100	500
C17	NEK2	100	500
C17	NEK3	87	500
C17	NEK4	100	500
C17	NEK5	95	500
C17	NEK6	99	500
C17	NEK7	94	500
C17	NEK9	96	500
C17	NIK	91	500
C17	NIM1	100	500
C17	NLK	88	500
C17	OSR1	89	500
C17	p38-alpha	99	500
C17	p38-beta	98	500
C17	p38-delta	80	500
C17	p38-gamma	82	500
C17	PAK1	92	500
C17	PAK2	84	500
C17	PAK3	78	500
C17	PAK4	88	500
C17	PAK6	96	500
C17	PAK7	81	500
C17	PCTK1	91	500
C17	PCTK2	97	500
C17	PCTK3	100	500
C17	PDGFRA	100	500
C17	PDGFRB	81	500
C17	PDPK1	98	500
C17	PFCDPK1(P.falciparum)	100	500
C17	PFPK5(P.falciparum)	82	500
C17	PFTAIRE2	90	500
C17	PFTK1	100	500
C17	PHKG1	88	500
C17	PHKG2	89	500
C17	PIK3C2B	96	500
C17	PIK3C2G	93	500
C17	PIK3CA	93	500
C17	PIK3CA(C420R)	100	500
C17	PIK3CA(E542K)	100	500
C17	PIK3CA(E545A)	100	500
C17	PIK3CA(E545K)	97	500
C17	PIK3CA(H1047L)	99	500
C17	PIK3CA(H1047Y)	99	500
C17	PIK3CA(I800L)	94	500
C17	PIK3CA(M1043I)	100	500
C17	PIK3CA(Q546K)	100	500
C17	PIK3CB	85	500
C17	PIK3CD	99	500
C17	PIK3CG	100	500
C17	PIK4CB	99	500
C17	PIKFYVE	69	500
C17	PIM1	4.5	500
C17	PIM2	63	500
C17	PIM3	20	500
C17	PIP5K1A	93	500
C17	PIP5K1C	99	500
C17	PIP5K2B	100	500
C17	PIP5K2C	50	500
C17	PKAC-alpha	100	500
C17	PKAC-beta	89	500
C17	PKMYT1	68	500
C17	PKN1	97	500
C17	PKN2	85	500
C17	PKNB(M.tuberculosis)	96	500
C17	PLK1	96	500
C17	PLK2	87	500
C17	PLK3	86	500
C17	PLK4	76	500
C17	PRKCD	97	500
C17	PRKCE	92	500
C17	PRKCH	79	500
C17	PRKCI	88	500
C17	PRKCQ	94	500
C17	PRKD1	100	500
C17	PRKD2	99	500
C17	PRKD3	73	500
C17	PRKG1	98	500
C17	PRKG2	84	500
C17	PRKR	98	500
C17	PRKX	86	500
C17	PRP4	100	500
C17	PYK2	90	500
C17	QSK	100	500
C17	RAF1	97	500
C17	RET	100	500
C17	RET(M918T)	88	500
C17	RET(V804L)	82	500
C17	RET(V804M)	96	500
C17	RIOK1	91	500
C17	RIOK2	87	500
C17	RIOK3	85	500
C17	RIPK1	91	500
C17	RIPK2	82	500
C17	RIPK4	100	500
C17	RIPK5	72	500
C17	ROCK1	89	500
C17	ROCK2	79	500
C17	ROS1	96	500
C17	RPS6KA4(Kin.Dom.1-N-terminal)	88	500
C17	RPS6KA4(Kin.Dom.2-C-terminal)	52	500
C17	RPS6KA5(Kin.Dom.1-N-terminal)	94	500
C17	RPS6KA5(Kin.Dom.2-C-terminal)	79	500
C17	RSK1(Kin.Dom.1-N-terminal)	86	500
C17	RSK1(Kin.Dom.2-C-terminal)	87	500
C17	RSK2(Kin.Dom.1-N-terminal)	96	500
C17	RSK2(Kin.Dom.2-C-terminal)	65	500
C17	RSK3(Kin.Dom.1-N-terminal)	100	500
C17	RSK3(Kin.Dom.2-C-terminal)	77	500
C17	RSK4(Kin.Dom.1-N-terminal)	78	500
C17	RSK4(Kin.Dom.2-C-terminal)	73	500
C17	S6K1	100	500
C17	SBK1	95	500
C17	SGK	100	500
C17	SgK110	100	500
C17	SGK2	97	500
C17	SGK3	89	500
C17	SIK	96	500
C17	SIK2	100	500
C17	SLK	100	500
C17	SNARK	95	500
C17	SNRK	92	500
C17	SRC	100	500
C17	SRMS	97	500
C17	SRPK1	90	500
C17	SRPK2	90	500
C17	SRPK3	88	500
C17	STK16	100	500
C17	STK33	96	500
C17	STK35	100	500
C17	STK36	98	500
C17	STK39	100	500
C17	SYK	100	500
C17	TAK1	84	500
C17	TAOK1	88	500
C17	TAOK2	95	500
C17	TAOK3	88	500
C17	TBK1	78	500
C17	TEC	95	500
C17	TESK1	94	500
C17	TGFBR1	100	500
C17	TGFBR2	100	500
C17	TIE1	100	500
C17	TIE2	93	500
C17	TLK1	92	500
C17	TLK2	100	500
C17	TNIK	86	500
C17	TNK1	68	500
C17	TNK2	84	500
C17	TNNI3K	94	500
C17	TRKA	100	500
C17	TRKB	100	500
C17	TRKC	81	500
C17	TRPM6	95	500
C17	TSSK1B	99	500
C17	TSSK3	69	500
C17	TTK	91	500
C17	TXK	90	500
C17	TYK2(JH1domain-catalytic)	93	500
C17	TYK2(JH2domain-pseudokinase)	96	500
C17	TYRO3	100	500
C17	ULK1	99	500
C17	ULK2	96	500
C17	ULK3	98	500
C17	VEGFR2	97	500
C17	VPS34	100	500
C17	VRK2	64	500
C17	WEE1	100	500
C17	WEE2	92	500
C17	WNK1	93	500
C17	WNK2	100	500
C17	WNK3	98	500
C17	WNK4	92	500
C17	YANK1	95	500
C17	YANK2	97	500
C17	YANK3	93	500
C17	YES	88	500
C17	YSK1	67	500
C17	YSK4	14	500
C17	ZAK	87	500
C17	ZAP70	91	500
