# Supplementary material for: Selective inhibition reveals the regulatory function of DYRK2 in protein synthesis and calcium entry
Source: eLife journal article supplement (doi:10.7554/elife.77696), 2022-04-19
Supplement: fig3-figsupp1-data1 [file Figure 3-figure supplement 1-source data 1.xlsx]

## Sheet: Sheet1
Protein	Protein names	Gene names	Phospho (STY) Probabilities	phosphosites	log2 intensity Treat_R1	log2 intensity Treat_R2	log2 intensity Treat_R3	log2 intensity Control_R1	log2 intensity Control_R2	log2 intensity Control_R3
A0A075B7F8	Nuclear envelope pore membrane protein POM 121C	POM121C	S(0.025)S(0.025)S(0.943)MS(0.006)S(0.001)LTGAYTSGIPSSSR	S370	21.6529	23.6312	24.2804	26.5553	25.7802	25.7965
A0A075B7F8	Nuclear envelope pore membrane protein POM 121C	POM121C	S(0.082)S(0.106)S(0.813)MS(0.056)S(0.942)LT(0.001)GAYTSGIPSSSR	S373	22.3303	21.1654	20.5728	25.0336	24.2135	24.9422
A0A087WSV0	Bcl-2-like protein 12	BCL2L12	RGEAAGS(1)PVPT(0.999)PPRS(0.983)PAQEEPT(0.014)DFLS(0.004)R	S37	21.8572	24.6575	20.4766	24.8683	25.1759	25.2221
A0A087WTP3	Far upstream element-binding protein 2	KHSRP	SVS(1)LTGAPESVQK	S193	25.3114	25.3297	25.4201	21.9172	21.4059	20.1202
Q5JWB9	Transmembrane protein 230	TMEM230	LSS(0.999)T(0.001)DDGYIDLQFK	S24	27.3429	26.9106	25.829	24.7131	24.1917	24.642
A0A087WUZ3	Spectrin beta chain, non-erythrocytic 1	SPTBN1	AQTLPTSVVTITSES(0.097)S(0.903)PGKR	S2343	23.3386	20.4608	28.7565	28.7782	28.7126	29.0139
A0A087WV69	Period circadian protein homolog 3	PER3	TPSHPTATVLS(0.021)T(0.049)GS(0.811)PPS(0.044)ES(0.054)PS(0.021)R	S1038	25.517	24.088	25.1391	21.8273	20.7465	21.5999
H7C4X9	Protein kinase C-binding protein 1	ZMYND8	TGQAGS(1)LS(0.082)GS(0.918)PKPFS(0.985)PQLS(0.014)APITTK	S413	25.6674	24.5762	24.094	27.7853	27.8129	27.6301
H7C4X9	Protein kinase C-binding protein 1	ZMYND8	TGQAGSLS(0.016)GS(0.982)PKPFS(0.002)PQLSAPITTK	S417	24.2749	25.8127	24.094	27.835	27.963	27.8347
A0A087WWP4	Putative RNA-binding protein 15	RBM15	RDGWS(1)LDR	S578	21.3363	21.1914	21.5657	24.338	23.1455	22.8813
A0A087WWP4	Putative RNA-binding protein 15	RBM15	S(1)LS(1)PGGAALGYR	S248	21.9581	22.3626	22.5797	25.4217	24.0415	23.9383
A0A087WX59	Proteasomal ubiquitin receptor ADRM1	ADRM1	DKKDEEEDMS(1)LD	S366	24.0187	24.5191	23.1474	22.1578	21.0109	21.5052
A0A087WX59	Proteasomal ubiquitin receptor ADRM1	ADRM1	S(0.011)QS(0.989)AAVT(0.992)PS(0.006)S(0.001)TTSSTR	S174	24.1635	24.2641	23.784	22.3196	21.3674	19.8659
A0A087WXN9	MTSS1-like protein	MTSS1L	GLS(1)LEHQK	S455	25.6213	26.0648	26.0172	22.5088	23.063	20.4328
A0A087WYN9	ATP-dependent RNA helicase DHX29	DHX29	IYSFNS(1)TNDSSGPANLDK	S71	26.169	25.4531	26.2039	22.5134	21.626	21.8218
A0A087WZ40	Ensconsin	MAP7	LSSSS(0.001)AT(0.021)LLNS(0.978)PDRAR	S231	24.5801	24.3642	24.5366	22.4855	22.0462	21.7604
A0A087X0X3	Heterogeneous nuclear ribonucleoprotein M	HNRNPM	MGS(1)GVER	S513	25.4636	25.1413	24.8171	21.0713	22.1875	21.9708
G3V2G2	Ataxin-3	ATXN3	NIS(1)QDMTQTSGTNLTSEELR	S86	24.5098	24.5522	24.3176	21.5404	21.5797	21.5455
A0A087X256	WASH complex subunit 7	KIAA1033	AVETLS(1)PDWEFDRVDDGSQK	S7	24.2523	23.4953	23.6353	21.8324	20.8338	20.3397
A0A088AWN2	WD repeat-containing protein 20	WDR20	RNS(0.983)T(0.017)DSRPVSVTYR	S388	25.7229	24.4505	25.3175	21.6017	24.0096	21.6116
A0A096LNV3	E3 ubiquitin-protein ligase RNF114	RNF114	ATIKDAS(1)LQPR	S129	24.1765	23.9645	23.8898	21.8678	21.2873	20.2559
A0A096LPC5	WASH complex subunit FAM21C	FAM21C	GLFS(1)DEEDSEDLFSSQSASNLK	S539	24.071	21.3968	21.4351	26.1005	25.5571	25.1715
F8W7U3	WASH complex subunit FAM21C;WASH complex subunit FAM21A	FAM21C;FAM21A	S(1)RPT(0.539)S(0.461)FADELAAR	S196	23.6135	23.093	23.6039	25.5027	25.7172	25.6035
F5H0Q6	CLK4-associating serine/arginine rich protein	CLASRP	ITFIT(0.002)S(0.01)FGGS(0.987)DEEAAAAAAAAAASGVTTGKPPAPPQPGGPAPGR	S335	21.4718	27.1445	21.0488	27.7057	27.2852	27.1612
A0A0A0MQW1	Kinase suppressor of Ras 1	KSR1	FDLSHGS(1)PQMVR	S257	21.9256	21.6857	22.8926	24.6151	23.8835	24.2698
A0A0A0MRB5	MAP kinase-activating death domain protein	MADD	LLRPNS(1)LR	S813	26.5568	26.1437	26.3256	22.0303	22.3399	22.115
A0A0A0MRB9	X-linked interleukin-1 receptor accessory protein-like 2	IL1RAPL2	AFFGFSGES(1)GPMIY(1)WMK	S18	21.8083	28.9211	20.8278	29.1264	29.03	28.8814
H0YBF7	Arf-GAP with SH3 domain, ANK repeat and PH domain-containing protein 1	ASAP1	SHPLDLS(0.999)PNVQS(0.001)R	S848	24.9153	25.087	24.3533	22.1621	22.7523	22.0921
A0A0A0MRK1	G patch domain-containing protein 4	GPATCH4	MATLTSGGEKPNKDLES(1)CS(1)DDDNQGS(0.001)K	S128	22.3783	22.6506	22.8752	26.5563	25.0204	25.3383
A0A0A0MRK1	G patch domain-containing protein 4	GPATCH4	DLESCSDDDNQGS(0.071)KS(0.929)PK	S139	23.5352	23.5262	23.3017	21.5406	21.1117	21.8436
A0A0A0MRM9	Nucleolar and coiled-body phosphoprotein 1	NOLC1	VAGGAAPS(0.001)KPAS(0.999)AK	S517	22.2823	26.0554	21.4048	25.8812	26.6738	26.009
F8WDP1	TBC1 domain family member 22A	TBC1D22A	S(0.152)QS(0.814)LPHS(0.012)AT(0.018)VT(0.004)LGGTSDPSTLSSSALSER	S167	25.9197	25.8268	26.1026	24.7755	21.9073	21.3608
A0A0A0MS29	Mitochondrial fission factor	MFF	ERS(1)MSENAVR	S79	27.1298	26.7009	26.4541	21.5594	20.6702	22.3592
A0A0A0MS29	Mitochondrial fission factor	MFF	SMS(1)ENAVR	S81	24.932	25.1867	21.7798	26.8276	26.73	26.6127
A0A0A0MS59	Helicase SRCAP	SRCAP	S(0.001)GPPS(0.991)PPS(0.002)T(0.002)AT(0.002)S(0.002)FGGPRPR	S1600	20.7368	20.4132	21.9134	25.6654	25.784	25.9725
A0A0A0MSA7	Eukaryotic translation initiation factor 4 gamma 3	EIF4G3	GGS(0.77)S(0.23)KDLLDNQSQEEQRR	S1192	21.7015	23.3613	20.5263	24.1028	24.1241	24.4894
A0A1B0GUS9	Espin	ESPN	SFNMMS(0.999)PT(0.001)GDNSELLAEIK	S22	24.2891	25.0549	24.8116	21.6277	20.0776	21.5395
A0A0A0MSU3	RecQ-mediated genome instability protein 1	RMI1	QS(0.001)S(0.999)FEPEFVISPR	S284	25.0186	24.9416	24.8743	23.2931	21.4962	21.6613
A0A0A0MT38	Dedicator of cytokinesis protein 9	DOCK9	ALS(1)KPGTAAELR	S21	26.5338	26.4748	26.4442	23.4368	21.8531	24.175
D3DP56	DNA-directed primase/polymerase protein	FLJ33167;PRIMPOL	LGS(1)AEQSSPDLSFLVVK	S126	25.282	25.6334	25.8796	22.7566	22.6719	21.8163
H3BMG9	Protein FAM65A	FAM65A	FSTYSQS(0.997)PPDT(0.003)PSLR	S310	22.8325	21.0755	21.6398	24.801	24.1154	24.6471
I3L167	Coronin;Coronin-7	CORO7-PAM16;CORO7	SLQS(1)LLGPSSK	S465	23.7625	25.0116	24.7345	21.6277	21.6324	22.3595
A0A0C4DG07	Nibrin	NBN	TTTPGPS(0.009)LS(0.99)QGVS(0.001)VDEK	S261	25.7204	25.5427	25.4061	21.1283	25.2914	20.9546
A0A0C4DG33	Peroxisome biogenesis factor 1	PEX1	TAS(1)QEGCQELTQEQR	S1124	28.0413	27.3686	28.1826	25.7847	25.6905	25.6319
E7ES21	Hephaestin	HEPH	S(1)ILDDSFK	S956	22.5817	22.48	22.478	24.7943	24.5682	24.6448
A0A0C4DGG3	Lysine-specific demethylase 2B	KDM2B	VISRPPPS(0.091)VS(0.909)PPK	S399	22.7508	21.5217	21.4707	24.6694	24.3406	23.6688
H7BXT7	BET1-like protein	BET1L	LKS(1)LALDIDRDAEDQNR	S37	24.196	23.9589	24.2708	22.3854	22.4578	21.7554
A0A0D9SFB3	ATP-dependent RNA helicase DDX3X	DDX3X	FS(1)GGFGAR	S594	24.2404	24.0149	23.996	26.5265	25.7196	25.6565
A0A0X1KG75	Cordon-bleu protein-like 1	COBLL1	QS(0.034)S(0.963)LT(0.003)FQSSDPEQMR	S1110	25.073	24.0735	24.2721	21.6884	21.7119	20.9125
Q5JRC6		PHF6	TAHNSEAADLEES(1)FNEHELEPS(0.724)S(0.276)PK	S146	21.9153	21.2431	24.309	26.5626	26.0029	25.1011
A0A0G2JHC2	Phostensin	PPP1R18	LLES(1)PGVEAGEGEAEKEEAGAQGRPLR	S368	25.9234	24.8492	25.1862	23.0054	22.4667	22.7123
H0Y6K2	Bromodomain-containing protein 2	BRD2	TAPPALPT(0.019)GYDS(0.973)EEEEES(0.004)RPMS(0.004)YDEKR	S639	21.506	20.7416	24.7736	25.3289	24.6079	25.1292
A0A0G2JMS7	Protein scribble homolog	SCRIB	ALAAVPS(0.191)AGS(0.809)VQR	S1198	22.3687	22.208	20.9982	25.3443	24.9286	24.7217
A0A0G2JMS7	Protein scribble homolog	SCRIB	LAEAPS(1)PAPT(0.001)PS(0.973)PT(0.026)PVEDLGPQT(0.048)S(0.139)T(0.123)S(0.368)PGRLS(0.323)PDFAEELR	S1460	21.4112	21.2569	21.7391	24.8011	23.7045	23.3249
A0A0G2JMS7	Protein scribble homolog	SCRIB	LAEAPS(1)PAPT(0.001)PS(0.973)PT(0.026)PVEDLGPQT(0.048)S(0.139)T(0.123)S(0.368)PGRLS(0.323)PDFAEELR	S1466	21.557	22.466	21.4207	24.8011	23.7045	23.3249
A0A0G2JMS7	Protein scribble homolog	SCRIB	MAESPCSPS(0.004)GQQPPS(0.997)PPS(0.999)PDELPANVK	S1225	20.7081	24.1003	20.8052	25.3486	24.6141	25.1199
A0A0G2JMS7	Protein scribble homolog	SCRIB	MAESPCSPS(0.004)GQQPPS(0.997)PPS(0.999)PDELPANVK	S1228	21.9544	24.1003	21.9686	26.0345	25.3729	25.1199
I3L170	Microtubule-associated protein;Microtubule-associated protein tau	MAPT	SGYS(0.051)S(0.949)PGSPGTPGSR	S130	21.7001	22.0209	22.3242	26.1091	26.495	26.2654
A0A0J9YVQ7	ATP-dependent RNA helicase DDX3Y	DDX3Y	FS(1)GGFGAR	S111	24.2404	24.0149	23.996	26.5265	25.7196	25.6565
A0A0J9YX88	PHD and RING finger domain-containing protein 1	PHRF1	T(0.001)IS(0.998)INS(0.001)PK	S864	24.6198	24.5937	25.0316	22.239	22.001	21.1929
A0A0J9YX88	PHD and RING finger domain-containing protein 1	PHRF1	VVELRPPS(1)R	S991	21.3769	21.2197	24.4407	25.899	25.0867	24.8025
A0A0U1RR27	C-myc promoter-binding protein	DENND4A	MNS(0.981)S(0.019)FSVKPFEK	S1195	24.2763	24.2767	24.2356	21.5708	21.8534	20.9057
A0A0U1RR27	C-myc promoter-binding protein	DENND4A	SSSPNS(1)PLPMFR	S731	22.6749	21.7543	22.0742	24.5261	24.0902	23.9172
P26599	Polypyrimidine tract-binding protein 1	PTBP1	DYGNS(1)PLHR	S433	25.8086	25.4523	26.0114	21.6152	22.7053	23.6801
K7EMZ9		LSM14A	TQLS(1)QAEVHK	S173	26.4393	27.2337	26.5492	23.8269	22.9196	23.1471
A0A1X7SBY3	Stromal interaction molecule 2	STIM2	S(1)IVPS(0.047)S(0.953)PQPQR	S518	24.7677	24.6593	24.6855	22.2221	21.8618	22.0612
J3QLT3	RalA-binding protein 1	RALBP1	TPS(0.953)S(0.047)EEISPTKFPGLYR	S29	24.8255	24.3435	23.8726	27.3016	26.6561	26.3269
A6NMQ3	Alpha-endosulfine	ENSA	KS(0.011)S(0.989)LVTSK	S132	29.6592	29.1905	28.409	25.8469	27.2796	26.7601
C9JXU1	Protein Shroom1	SHROOM1	S(0.047)AS(0.784)LS(0.169)HPGGEGEPAR	S188	22.9601	21.2402	21.3879	23.9241	24.4503	23.9612
Q15154	Pericentriolar material 1 protein	PCM1	RRQFDEES(1)LES(0.991)FS(0.019)S(0.99)MPDPVDPTTVTK	S1263	25.2753	25.7217	26.8142	25.3524	21.8131	20.8778
Q15154	Pericentriolar material 1 protein	PCM1	QQNIS(1)MQR	S977	21.7347	21.7515	25.9243	27.2309	26.6879	27.0823
E7EPE2	E3 ubiquitin-protein ligase Mdm2	MDM2;mdm2	AIS(1)ETEENSDELSGER	S197	22.8244	23.423	21.9137	25.4294	25.5224	25.6216
H0YH14	Alpha-2-macroglobulin-like protein 1	A2ML1	SS(0.002)S(0.998)NMAIVEVK	S90	21.1766	21.4514	21.8864	24.4995	24.0537	23.5605
A9Z1X7	Serine/arginine repetitive matrix protein 1	SRRM1	APQT(0.002)S(0.998)S(0.894)S(0.106)PPPVR	S704	30.603	30.6883	26.8346	23.5842	26.3935	24.7043
A9Z1X7	Serine/arginine repetitive matrix protein 1	SRRM1	APQTSS(0.015)S(0.985)PPPVR	S705	26.6683	21.0169	30.0418	30.0214	30.2489	30.7759
S4R3W2	Nuclear factor 1;Nuclear factor 1 A-type	NFIA	LKS(1)VEDEMDS(1)PGEEPFYTGQGR	S47	24.3257	24.7145	23.7133	22.6677	21.8819	20.5278
B1AKZ5	Astrocytic phosphoprotein PEA-15	PEA15	YKDIIRQPS(1)EEEIIK	S94	27.3541	26.8227	27.1832	22.7662	22.7565	21.167
B4DTS2	Serine/threonine-protein kinase;Serine/threonine-protein kinase D2;Serine/threonine-protein kinase D3;Serine/threonine-protein kinase D1	PRKD2;PRKD3;PRKD1	IIGEKS(1)FRR	S706	24.1173	23.2908	23.6913	21.6206	21.5352	22.037
B4DTS2	Serine/threonine-protein kinase;Serine/threonine-protein kinase D2	PRKD2	LGT(0.002)S(0.008)ES(0.99)LPCTAEELSR	S214	24.0579	24.2166	24.8831	21.9652	22.5194	20.2679
B4DTS2	Serine/threonine-protein kinase;Serine/threonine-protein kinase D2	PRKD2	RLS(0.861)S(0.067)T(0.019)S(0.052)LASGHSVR	S197	25.1422	22.0417	21.0903	26.4661	25.7967	26.3236
B4DTS2	Serine/threonine-protein kinase;Serine/threonine-protein kinase D2	PRKD2	S(1)VVGTPAYLAPEVLLNQGYNR	S710	24.002	24.285	24.4558	20.9805	21.4435	21.634
E7EU85	Fragile X mental retardation syndrome-related protein 1	FXR1	RGPNYTSGYGTNSELSNPS(0.97)ET(0.029)ES(0.001)ER	S324	23.4777	22.8774	23.8654	26.3642	25.2269	25.0125
B5MBZ0	Echinoderm microtubule-associated protein-like 4	EML4	AS(0.001)PS(0.999)PQPSSQPLQIHR	S146	23.1572	23.2719	22.7929	25.1864	25.054	25.3238
Q15032	R3H domain-containing protein 1;cAMP-regulated phosphoprotein 21	R3HDM2;R3HDM1;ARPP21	S(0.02)KS(0.98)IEEREEEYQR	S282	25.9204	25.2549	25.5706	22.1289	21.0646	21.7933
Q99613	Eukaryotic translation initiation factor 3 subunit C;Eukaryotic translation initiation factor 3 subunit C-like protein	EIF3C;EIF3CL	FFT(0.003)T(0.26)GS(0.74)DS(0.985)ES(0.01)ES(0.001)SLSGEELVTKPVGGNYGK	S11	21.6566	21.8852	22.0617	25.7791	25.2575	25.2101
B7WPE2	Echinoderm microtubule-associated protein-like 3	EML3	AIS(1)SANLLVR	S177	24.8955	24.5995	23.9665	26.0503	26.8551	26.7127
F8W052	Tastin	TROAP	GVS(0.989)PT(0.021)PS(0.991)KIPVR	S20	24.1058	23.9361	23.9436	22.2459	22.4295	20.9043
B8ZZU6	Cyclic AMP-dependent transcription factor ATF-2	ATF2	KMPLDLS(1)PLAT(1)PIIR	S94	25.5499	25.4951	25.1147	21.8622	23.4396	22.9564
B8ZZU6	Cyclic AMP-dependent transcription factor ATF-2	ATF2	NDS(1)VIVADQT(0.997)PT(0.939)PT(0.064)R	S44	24.8421	25.0585	24.7278	20.9419	21.0155	21.139
B8ZZU6	Cyclic AMP-dependent transcription factor ATF-2	ATF2	NCEEVGLFNELAS(1)PFENEFKK	S72	24.4484	24.4281	24.8467	22.1331	21.3347	19.7142
C9J2I0	Arf-GAP domain and FG repeat-containing protein 1	AGFG1	GTPSQS(1)PVVGR	S103	22.3399	27.1146	20.8555	28.0458	28.211	28.4043
B9EGQ5	Protein Wiz	WIZ	KLPPPPGS(0.995)PLGHS(0.982)PT(0.562)AS(0.4)PPPT(0.062)AR	S327	26.3368	25.8678	26.6212	23.47	21.4958	25.1741
B9EGQ5	Protein Wiz	WIZ	KLPPPPGS(0.995)PLGHS(0.982)PT(0.562)AS(0.4)PPPT(0.062)AR	S332	25.829	25.8678	26.6212	23.47	21.6456	20.4263
C9IZZ0	Ras-related protein Rab-7a	RAB7A	FQS(1)LGVAFYR	S72	28.7645	28.1607	28.1625	24.0484	24.0379	23.739
C9JE98	Nuclear receptor corepressor 2	NCOR2	SGLEPAS(0.09)S(0.837)PS(0.066)KGS(0.006)EPRPLVPPVSGHATIAR	S1961	21.466	24.6836	21.1084	26.5739	26.1482	25.9278
C9J2P9	E3 ubiquitin-protein ligase Hakai	CBLL1	SVS(1)QETFR	S228	22.3416	21.799	22.3516	24.3053	24.4945	24.1739
C9J494	Probable E3 ubiquitin-protein ligase makorin-2	MKRN2	NLS(1)GMAER	S113	20.9686	21.5843	21.7792	25.0237	24.7852	24.2043
C9J4Z7		ARPC1B	VIS(1)ICYFEQE	S121	26.9375	26.9767	27.2343	22.4629	21.4595	21.2635
E9PNJ7	Nucleosome assembly protein 1-like 4	NAP1L4	ADHS(1)FS(1)DGVPSDSVEAAK	S7	27.2005	27.2593	27.3299	29.7573	29.4806	29.2378
E9PNJ7	Nucleosome assembly protein 1-like 4	NAP1L4	ADHSFSDGVPS(1)DSVEAAK	S12	23.9992	24.7769	23.7643	30.6133	29.9799	29.9008
H7C2T4	Sprouty-related, EVH1 domain-containing protein 2	SPRED2	QVS(1)FPDDDEEIVR	S88	24.2721	24.2954	24.043	20.466	20.2352	23.2128
C9JIE2	TBC1 domain family member 1	TBC1D1	SFS(1)QPGLR	S108	22.3376	22.113	22.3591	23.9488	23.906	24.1975
H7C0T1	Uncharacterized protein C7orf50	C7orf50	ELDEEGS(1)DPPLPGR	S143	20.7652	21.0537	21.7747	25.8234	25.4539	25.4346
C9JRJ5	LIM domain-containing protein 1	LIMD1	EGPLGWSSDGSLGSVLLDS(0.994)PS(0.415)S(0.591)PR	S421	24.2736	24.0143	24.2101	22.2387	21.086	22.4039
C9JRJ5	LIM domain-containing protein 1	LIMD1	EGPLGWSSDGSLGSVLLDS(0.963)PS(0.111)S(0.926)PR	S424	24.2736	24.0143	24.2101	22.5692	21.8697	22.4039
C9JRJ5	LIM domain-containing protein 1	LIMD1	QLS(1)LSSSR	S233	25.7572	25.6892	25.9274	22.7899	22.5289	22.7283
C9JRP1	Anion exchange protein	SLC4A7	NGILASPQS(1)APGNLDNSK	S258	21.6052	22.1682	21.0427	24.885	24.6545	24.9494
C9JZ20	Prohibitin	PHB	QVS(1)DDLTER	S151	24.6143	24.5478	23.8485	21.3734	21.6095	21.4139
C9JWC4	Holliday junction recognition protein	HJURP	LPS(0.016)S(0.984)PLGCR	S557	21.8938	21.7828	21.4949	23.3794	24.7402	24.4625
C9JWC4	Holliday junction recognition protein	HJURP	VTPLPS(0.008)LAS(0.99)PAVPAPGY(0.001)CS(0.001)R	S100	24.1331	24.3313	24.2719	22.0978	21.3718	22.0539
D3DTX6	Neurabin-2	PPP1R9B	AS(0.002)S(0.998)LNENVDHSALLK	S100	28.2783	28.011	27.8428	24.5051	24.969	24.2743
D3YTB5	Interleukin-1 receptor-associated kinase 1	IRAK1	FAGS(0.002)S(0.997)PS(0.002)QSSMVAR	S397	24.5317	23.8942	24.9107	21.7184	21.9983	22.8387
D6RAM3	Docking protein 3	DOK3	AT(0.008)S(0.992)LPS(0.986)LDT(0.014)PGELR	S277	22.6877	24.196	23.6953	21.724	21.6563	20.4982
D6RBP0	Sodium channel and clathrin linker 1	SCLT1	RLS(1)QAEER	S252	24.3536	23.8396	23.5744	21.838	21.8283	21.349
D6RC71	Syntaxin-18	STX18	VSQS(0.994)PS(0.005)KDSEENPATEERPEK	S108	21.4922	22.0196	24.8976	24.965	25.8439	25.9089
E1P5H9	Solute carrier organic anion transporter family member 4A1	SLCO4A1	AS(0.018)PGT(0.98)PLS(0.901)PGS(0.1)LR	S40	23.1876	22.8284	23.2258	25.0912	24.7796	24.7332
E3W994	CLIP-associating protein 2	CLASP2	S(0.1)S(0.1)GS(0.799)VASLPQSDR	S313	21.213	21.4461	22.1144	25.3176	25.6239	25.4137
E3W994	CLIP-associating protein 2	CLASP2	VLNTGS(1)DVEEAVADALKKPAR	S575	24.5486	24.3793	24.4033	27.5845	26.4379	26.0678
E5RFJ5	Telomeric repeat-binding factor 1	TERF1	AEDVS(0.003)S(0.997)AAPS(1)PR	S7	24.9251	25.0241	25.4562	21.9111	23.0496	20.7447
E5RFV8	Double-strand-break repair protein rad21 homolog	RAD21	EEVGNIS(1)ILQENDFGDFGMDDR	S153	22.7664	21.4917	21.9727	24.2813	24.7373	24.5339
E5RHB3	Tetratricopeptide repeat protein 13	TTC13	INEAVNDLT(0.162)KAIQLQPS(0.838)AR	S138	25.1284	25.4336	25.5193	21.5115	21.952	24.7905
E7EPN9	Protein PRRC2C	PRRC2C	DAQQVEPEGQEKPS(0.782)PAT(0.218)VR	S2145	25.9703	25.7653	25.1318	23.7768	22.4323	21.2146
E7EPN9	Protein PRRC2C	PRRC2C	SFS(0.992)S(0.008)QRPVDR	S1546	22.3449	22.5389	23.9907	29.8929	30.4322	30.4661
J3KN87	Serine/threonine-protein kinase Chk1	CHEK1	VTS(0.979)GGVS(0.012)ES(0.006)PS(0.003)GFSK	S280	21.4282	21.0387	21.341	28.2284	27.8826	28.0738
H7C3L4	TRAF family member-associated NF-kappa-B activator	TANK	GAPS(1)IT(0.35)S(0.634)VT(0.016)PR	S99	25.5624	25.221	25.3662	20.8612	20.8346	21.5304
H7C3L4	TRAF family member-associated NF-kappa-B activator	TANK	GAPS(0.999)IT(0.141)S(0.824)VT(0.036)PR	S102	24.3293	24.2144	24.0205	21.8681	22.6326	21.5709
E9PGG1		DYNC1I2	EAEALLQSMGLT(0.009)PES(0.991)PIVPPPMS(0.532)PS(0.189)S(0.28)K	S73	29.4622	28.7211	27.5499	25.951	25.6738	25.0303
S4R3H4	Apoptotic chromatin condensation inducer in the nucleus	ACIN1	AAKLS(1)EGS(1)QPAEEEEDQETPSR	S182	24.7925	21.6143	21.6462	26.3917	26.6851	27.3736
S4R3H4	Apoptotic chromatin condensation inducer in the nucleus	ACIN1	AAKLS(1)EGS(1)QPAEEEEDQETPSR	S185	24.0571	21.2754	23.1448	26.8609	26.9479	26.5274
S4R3H4	Apoptotic chromatin condensation inducer in the nucleus	ACIN1	KIS(1)VVSATK	S767	27.3805	26.8007	27.1186	24.4333	25.0801	24.3643
S4R3H4	Apoptotic chromatin condensation inducer in the nucleus	ACIN1	S(0.873)KS(0.31)PS(0.809)PPRLT(0.008)EDR	S326	20.9715	20.1266	21.032	26.5908	27.7626	26.2425
J3KQ96		TCOF1	KQEGPATQVDSAVGTLPAT(0.016)S(0.956)PQS(0.012)T(0.012)S(0.003)VQAK	S1073	28.141	21.5253	21.7785	28.1115	27.9531	27.867
E7EUL7	Sperm-specific antigen 2	SSFA2	SLAS(1)IEAK	S177	23.9502	23.7573	23.5429	21.5862	22.1383	21.7662
E7EVA0	Microtubule-associated protein;Microtubule-associated protein 4	MAP4	ADLSLADALTEPS(1)PDIEGEIKR	S14	26.6695	26.5065	26.6647	21.4037	24.7507	23.9431
E7EVA0	Microtubule-associated protein;Microtubule-associated protein 4	MAP4	LATNT(0.002)S(0.998)APDLK	S2073	25.3849	25.3395	25.665	29.5269	29.7667	29.5689
E7EX17	Eukaryotic translation initiation factor 4B	EIF4B	AFGS(1)GYR	S283	24.8731	24.9305	25.2669	24.2028	21.6133	20.7854
E7EX17	Eukaryotic translation initiation factor 4B	EIF4B	S(0.002)QS(0.996)S(0.002)DTEQQSPTSGGGK	S502	26.886	26.7061	26.0728	22.5364	22.6602	22.2056
E9PB39	Rho guanine nucleotide exchange factor 10	ARHGEF10	TKS(1)LIAQDHR	S110	25.1792	24.9239	24.5142	22.5452	22.4963	22.9819
E9PCY7	Heterogeneous nuclear ribonucleoprotein H;Heterogeneous nuclear ribonucleoprotein H, N-terminally processed	HNRNPH1	GLPWS(0.045)CS(0.955)ADEVQR	S23	25.8022	25.1243	25.4061	23.013	22.7144	22.1565
E9PD50	Protein SMG7	SMG7	SVLS(0.893)T(0.09)S(0.017)R	S557	21.3322	22.1313	21.2933	24.0956	24.1534	24.3863
E9PFK9	Rab5 GDP/GTP exchange factor	RABGEF1	QT(0.017)S(0.961)IET(0.017)DRVS(0.006)KEFIEFLK	S145	23.2518	22.8242	22.6201	21.3972	20.6336	20.8497
E9PG22	Centrosomal protein of 97 kDa	CEP97	S(1)VALGQDKVALQK	S486	23.9446	23.8566	23.8001	21.8115	20.6633	21.2151
E9PGT3	Ribosomal protein S6 kinase;Ribosomal protein S6 kinase alpha-1	RPS6KA1	GFS(1)FVATGLMEDDGKPR	S369	22.8376	22.5559	22.8583	20.9565	20.5853	21.2526
E9PK52	Band 4.1-like protein 2	EPB41L2	EIS(0.005)PGS(0.995)GPGEIR	S648	23.9534	21.5239	21.4266	26.0373	25.1585	25.2873
E9PJK2	Polycomb protein EED	EED	LSSDENSNPDLS(0.999)GDENDDAVS(0.001)IESGTNTERPDTPTNTPNAPGR	S34	24.1898	23.7955	24.554	21.4368	21.0926	21.9093
E9PPF9	Mitochondrial fission regulator 1-like	MTFR1L	ASS(1)FADMMGILK	S141	22.0668	22.2325	21.4339	24.4851	23.5652	23.9374
E9PPF9	Mitochondrial fission regulator 1-like	MTFR1L	NAS(1)VPNLRGS(1)EER	S6	26.7744	26.3788	26.5976	28.8026	28.5917	28.6805
E9PMG4	Telomerase Cajal body protein 1	WRAP53	IEEQELS(0.002)ENT(0.002)S(0.002)LPAEEANGS(0.183)LS(0.811)EEEANGPELGSGK	S114	21.1015	24.8589	22.4515	24.4089	26.8471	25.4026
E9PNG1	CSC1-like protein 2	TMEM63B	LTS(1)VSSSVDFDQR	S111	26.3285	26.5731	26.8449	24.7168	24.5081	25.0081
Q13586	Stromal interaction molecule 1	STIM1	DLT(0.005)HS(0.993)DS(0.002)ESSLHMSDR	S519	21.7782	23.5064	24.3414	26.4052	27.0412	26.1485
Q13586	Stromal interaction molecule 1	STIM1	DLTHS(0.006)DS(0.988)ES(0.006)SLHMSDR	S521	21.4655	21.8558	22.1079	26.3873	26.6944	26.2503
Q13586	Stromal interaction molecule 1	STIM1	S(0.012)HS(0.987)PS(0.005)S(0.996)PDPDTPSPVGDSR	S621	24.5156	24.9582	24.7975	21.9709	21.1854	23.3769
Q13586	Stromal interaction molecule 1	STIM1	SHS(0.001)PS(0.002)S(0.002)PDPDT(0.994)PS(0.98)PVGDS(0.021)R	S628	23.3468	23.657	23.9377	21.7999	21.8834	21.7353
E9PQC4	Kinetochore protein Nuf2	NUF2	LDS(1)VPVEEQEEFK	S171	23.9404	23.8848	24.0695	22.2435	21.6537	21.264
F1T0I1	Protein transport protein Sec16A	SEC16A	ADSGPT(0.005)QPPLS(0.994)LS(0.955)PAPET(0.046)KRPGQAAK	S2081	26.6846	24.9382	26.6763	22.6272	21.5856	21.425
H0Y4W2	Transformation/transcription domain-associated protein	TRRAP	GLS(1)VDSAQEVKR	S1773	25.5604	25.5837	25.4129	22.4235	21.7265	21.2265
H0Y4W2	Transformation/transcription domain-associated protein	TRRAP	SQS(1)LPGADSLLAKPIDK	S1799	25.5743	24.8764	25.2202	22.8325	22.574	23.1982
F5GWT4	Serine/threonine-protein kinase WNK1	WNK1	SIS(1)NPPGSNLR	S2124	21.3432	23.4041	21.6565	26.3637	25.8885	26.1364
J3KS87	Nuclear pore complex protein Nup85	NUP85	AIIREGS(1)LEGS	S94	24.7968	24.6012	24.4626	21.5984	21.4597	22.5062
F5H4R1	Mitogen-activated protein kinase kinase kinase 4	MAP3K4	GQENT(0.05)S(0.95)GFWLNR	S253	23.4615	23.1149	23.4122	20.8069	21.6242	21.8299
F8W020	Nucleosome assembly protein 1-like 1	NAP1L1	EQS(1)ELDQDLDDVEEVEEEETGEETKLK	S10	25.3493	21.5464	19.7155	26.1799	29.1502	28.181
F5H5P2	2-oxoisovalerate dehydrogenase subunit alpha, mitochondrial	BCKDHA	S(1)VDEVNYWDK	S381	22.2262	21.4844	24.7853	25.433	27.1577	26.834
F5H7X4	ADP-ribosylation factor-like protein 6-interacting protein 4	ARL6IP4	S(1)AGEEEDGPVLTDEQK	S260	28.1444	28.16	28.0255	30.2399	29.749	29.9293
F6RY50	Signal-induced proliferation-associated protein 1	SIPA1	QLGS(1)PTADLA	S934	23.9702	23.7175	24.1154	21.632	22.334	22.0007
F8VSC4	Methionine aminopeptidase 2	METAP2	S(1)KGPSAAGEQEPDKESGASVDEVAR	S45	21.9796	20.3672	22.6396	24.42	25.7523	25.3155
F8W667	Squamous cell carcinoma antigen recognized by T-cells 3	SART3	ATAAET(0.046)S(0.955)AS(0.998)EPEAESK	S10	24.1093	27.076	22.3288	27.3546	27.6896	27.6663
Q5JRU2	Caspase;Caspase-9;Caspase-9 subunit p35;Caspase-9 subunit p10	CASP9	DHGFEVAS(0.009)T(0.02)S(0.061)PEDES(0.896)PGS(0.014)NPEPDATPFQEGLR	S224	24.9082	24.5543	24.5434	22.5368	22.4234	20.7616
F8VWP4	AT-rich interactive domain-containing protein 2	ARID2	VS(0.001)HS(0.998)PALSS(0.001)DVR	S104	25.2721	24.4375	24.7571	21.3808	21.1861	22.3632
F8VWT9	Probable E3 ubiquitin-protein ligase HECTD4	HECTD4	SIS(0.999)GT(0.001)PAETPACK	S1363	25.5408	25.4446	25.5301	21.2378	21.438	21.8717
F8VXG7	Protein SCAF11	SCAF11	NS(0.002)S(0.998)GPQSGWMK	S978	20.9852	21.2697	21.3698	24.0139	23.5168	22.2921
H0Y7R3	Serine/threonine-protein kinase WNK2	WNK2	EQQDVGS(1)PDKAR	S164	23.4964	24.0192	24.0985	21.7648	22.0899	21.7472
F8WA39	Myotubularin-related protein 1	MTMR1	QPSVET(0.011)LDS(0.985)PT(0.003)GSHVEWCK	S49	24.9091	24.3202	24.9625	23.3762	23.0156	20.5024
F8WAE5	Eukaryotic translation initiation factor 2A;Eukaryotic translation initiation factor 2A, N-terminally processed	EIF2A	NTVSQS(0.021)IS(0.979)GDPEIDKK	S523	23.7243	23.8213	23.9743	20.4375	21.3506	20.9976
F8WF45	TATA element modulatory factor	TMF1	VSES(1)VIDVK	S199	21.6122	20.6969	21.7564	24.4158	24.3802	24.17
F8WF69	Clathrin light chain A	CLTA	LQS(1)EPESIRK	S105	25.0103	25.0836	24.8702	22.8951	23.2877	23.1145
G3V5D0	G patch domain-containing protein 2-like	GPATCH2L	EVAPVTNFS(1)DS(0.987)DDT(0.013)MVAK	S86	22.0797	21.9445	22.3716	24.45	23.9966	24.2695
G3V5D0	G patch domain-containing protein 2-like	GPATCH2L	EVAPVTNFS(0.996)DS(0.998)DDT(0.006)MVAK	S88	23.0388	20.898	21.659	24.45	23.9966	24.2695
G3V292		PPP2R5C	KNS(1)LVAVPSTVSAK	S39	26.1276	25.7377	25.7105	23.1886	23.5709	23.4717
G3V3B0		ACIN1	KIS(1)VVSTK	S67	25.6468	25.8957	25.1064	22.4856	23.1543	22.4504
G3V4K3	Spermatogenesis-defective protein 39 homolog	VIPAS39	T(0.001)RPGS(0.999)FQSLSDALSDTPAK	S147	24.5802	23.8421	24.522	27.4875	27.1906	26.8202
H0Y2V6	Centrosomal protein of 170 kDa	CEP170	STGS(1)ATSLASQGER	S594	21.8341	22.8513	22.1378	24.6159	24.1463	24.6092
H0Y2Y8	Zyxin	ZYX	GPPAS(0.011)S(0.989)PAPAPK	S227	24.6147	20.731	24.0705	26.4095	26.5214	25.4947
H0YCL9	AMP deaminase 2	AMPD2	QIS(1)QDVKLEPDILLR	S135	24.1793	24.0234	23.6267	21.3979	21.1301	20.8354
H0Y8X4	2'-deoxynucleoside 5'-phosphate N-hydrolase 1	DNPH1	AAAMVPGRS(0.766)ES(0.234)WER	S9	23.8707	23.1671	23.4448	21.5229	22.0902	20.8133
H0Y8X4	2'-deoxynucleoside 5'-phosphate N-hydrolase 1	DNPH1	YFEADPPGQVAAS(1)PDPTT	S238	21.9442	26.5477	22.5413	27.5249	26.2808	26.3207
H0YA93	NEDD4-binding protein 2	N4BP2	LVNSVS(1)VNTDCVQQR	S479	23.5976	23.1876	23.8581	21.9502	21.1352	20.1567
H0YFN7	RAB6A-GEF complex partner protein 1	RIC1	SIS(1)LSQSAENVPASK	S909	26.6249	26.1737	26.0672	24.1353	23.9895	23.6232
H0YLN8	Transient receptor potential cation channel subfamily M member 7	TRPM7	NTSS(0.003)S(0.824)T(0.174)PQLR	S554	21.4244	21.0148	20.85	24.0592	24.277	24.0566
H3BMQ0	Tuberin	TSC2	S(0.025)S(0.025)S(0.805)S(0.145)PELQTLQDILGDPGDKADVGR	S1331	21.8599	22.4102	20.6282	25.5511	25.2595	24.606
H3BMQ0	Tuberin	TSC2	VGALDVPASQFLGS(0.022)AT(0.189)S(0.789)PGPR	S1122	20.9481	20.397	20.8506	22.7526	23.3072	22.9331
H3BMQ0	Tuberin	TSC2	VVS(0.937)S(0.063)EGGRPSVDLSFQPSQPLSK	S1308	24.944	24.3493	24.7962	21.5394	21.7006	21.6676
H3BND4	Pyridoxal-dependent decarboxylase domain-containing protein 1	PDXDC1	GSDALS(0.999)ET(0.018)S(0.286)S(0.573)VS(0.124)HIEDLEKVER	S736	21.8355	22.2958	22.475	25.7779	24.7265	24.9426
H3BND4	Pyridoxal-dependent decarboxylase domain-containing protein 1	PDXDC1	GVPHPEDDHSQVEGPES(1)LR	S804	25.0502	24.9005	24.6084	23.4796	22.0486	22.1786
Q93100	Phosphorylase b kinase regulatory subunit beta	PHKB	SGS(1)VYEPLK	S27	26.8968	26.5958	27.0598	24.3046	25.0406	24.3696
H3BQZ7	Heterogeneous nuclear ribonucleoprotein U-like protein 2	HNRNPUL2-BSCL2;HNRNPUL2	S(0.131)KS(0.869)PLPPEEEAKDEEEDQTLVNLDTYTSDLHFQVSK	S228	27.1725	20.72	22.0951	27.6022	27.6585	25.6651
H7BYT1	Casein kinase I isoform delta	CSNK1D	GLPS(0.008)T(0.108)AS(0.884)GR	S331	21.9288	21.7843	23.4283	25.833	25.5581	25.5994
H7BZ15	Small membrane A-kinase anchor protein	C2orf88	MAS(0.984)PVNVKEEVKEPPGT(0.012)NT(0.003)VILEYAHR	S40	21.7161	20.427	22.1027	24.0651	24.2271	23.0029
H7BZ88	Signal transducer and activator of transcription 1-alpha/beta	STAT1	LQTTDNLLPMS(1)PEEFDEVSR	S17	25.5186	25.6583	25.176	23.2004	23.5109	23.6865
P18583	Protein SON	SON	SAASPVVSS(0.003)MPERAS(0.959)ES(0.653)S(0.652)S(0.691)EEKDDY(0.042)EIFVK	S1780	25.2561	23.8803	20.8916	26.8182	26.3205	26.5659
H7C1M2		SON	VLINGSAYQPS(0.001)FAS(0.999)PNKK	S1416	24.9317	24.8551	25.3627	20.3988	22.9801	23.2099
H7C1V4	Nck-associated protein 5-like	NCKAP5L	LQIGPPS(1)PGEAQGPLLPSPAR	S155	23.9743	23.1477	23.2516	21.0154	20.9383	20.9118
H7C1V4	Nck-associated protein 5-like	NCKAP5L	NS(0.001)GS(0.998)DGS(0.003)PS(0.998)PLLAR	S213	23.7687	23.0339	23.0841	26.2173	26.0493	25.7296
H7C1V4	Nck-associated protein 5-like	NCKAP5L	SPSPGGPQLS(1)PQLPR	S192	21.4516	21.3272	21.2422	25.8986	24.5243	23.9974
H7C2F7	Trafficking protein particle complex subunit 12	TRAPPC12	SPS(1)FGGASEASAR	S17	21.0154	22.208	21.3354	25.9246	25.4205	25.5088
H7C3E5	Mediator of RNA polymerase II transcription subunit 14	MED14	AGNWPGS(0.933)PQVS(0.193)GPS(0.874)PAAR	S18	24.9615	24.66	24.9864	22.1835	21.7609	20.9089
H7C3E5	Mediator of RNA polymerase II transcription subunit 14	MED14	MPGMS(0.993)PANPS(0.648)LHS(0.359)PVPDAS(0.574)HS(0.426)PR	S27	24.4528	24.1834	24.1811	21.3659	20.604	21.7025
H7C419	Cleavage and polyadenylation specificity factor subunit 4	CPSF4	S(0.001)S(0.002)S(0.997)LIQLTSQNS(0.617)S(0.383)PNQQR	S84	28.0662	27.9541	28.3857	27.2316	25.173	24.841
H9KVB4	Trinucleotide repeat-containing gene 18 protein	TNRC18	ALS(1)PGLEESGLGLLAR	S1857	22.0845	21.4286	22.8011	24.4172	24.9469	23.7558
I3L280	Unconventional prefoldin RPB5 interactor 1	URI1	SIS(1)CEEATCSDTSESILEEEPQENQKK	S189	26.7364	26.8582	26.9414	24.3206	24.9723	24.7819
I3L4R8	Replication protein A 70 kDa DNA-binding subunit;Replication protein A 70 kDa DNA-binding subunit, N-terminally processed	RPA1	GARVS(1)DFGGR	S140	24.4401	21.1409	21.3091	25.3672	25.4106	25.4071
J3KNG8	Folliculin-interacting protein 1	FNIP1	NKS(1)S(1)LLFK	S548	21.8782	20.7476	21.4659	25.1427	24.3216	24.4718
J3KNG8	Folliculin-interacting protein 1	FNIP1	NKS(1)S(1)LLFK	S549	21.5469	21.4889	20.6022	24.9636	24.0874	24.1645
J3KNG8	Folliculin-interacting protein 1	FNIP1	VTFLIGDSMS(0.998)PDS(0.974)DT(0.028)ELR	S715	21.094	21.3298	23.1349	24.9257	24.2466	24.3848
J3KNG8	Folliculin-interacting protein 1	FNIP1	VTFLIGDS(0.005)MS(0.995)PDS(0.994)DT(0.006)ELR	S718	21.094	20.7919	23.1349	24.2358	24.2466	24.3848
J3KNL6	Protein transport protein Sec16A	SEC16A	CSS(1)MSSLSR	S2295	23.2703	20.8074	22.1604	24.6552	24.8311	24.3653
J3KP30	Deoxynucleotidyltransferase terminal-interacting protein 2	DNTTIP2	NLSELQDT(0.002)S(0.998)LQQLVSQR	S330	23.4841	23.1339	21.2652	25.4716	24.9757	25.0821
J3KP30	Deoxynucleotidyltransferase terminal-interacting protein 2	DNTTIP2	QIVGTPVNS(0.132)EDS(0.806)DT(0.062)R	S239	21.8279	23.3112	21.5981	25.5117	24.5741	23.9527
J3KPD3	RNA-binding protein 7	RBM7	MNS(1)YPYLADR	S205	24.1423	23.3177	24.002	22.1137	21.3604	21.3233
J3KPD3	RNA-binding protein 7	RBM7	QAVMNS(1)ALR	S150	23.9632	23.4847	24.2917	22.0962	22.2136	21.8563
J3KPD3	RNA-binding protein 7	RBM7	SFS(1)SPENFQR	S137	30.1934	30.395	30.3411	27.0225	27.3598	27.2806
J3KT51	Hematological and neurological expressed 1 protein;Hematological and neurological expressed 1 protein, N-terminally processed	HN1	RNS(1)SEAS(0.852)S(0.148)GDFLDLK	S91	25.1584	25.185	25.1572	23.188	20.7483	21.7653
J3QL46	Period circadian protein homolog 1	PER1	GLDSSS(0.001)T(0.006)APS(0.993)ALGER	S98	21.8565	22.1237	21.1673	26.3926	26.02	25.8487
J3QK89	Calcium homeostasis endoplasmic reticulum protein	CHERP	SYS(1)FIAR	S915	24.5267	24.0599	23.9941	22.058	21.2833	22.1355
J3QQW9	Polycomb protein SUZ12	SUZ12	AS(0.127)MS(0.873)EFLES(1)EDGEVEQQR	S518	21.325	21.9294	21.8976	24.144	24.6221	23.471
K7ELD9	Synaptogyrin-2	SYNGR2	MES(1)GAYGAAK	S3	25.7159	25.3526	25.5234	23.4522	23.8226	23.4889
K7ELQ4	Cyclic AMP-dependent transcription factor ATF-7	ATF7	AAAGPLDMS(1)LPS(0.018)T(0.982)PDIK	S97	26.5326	26.3786	26.4316	25.2139	21.0729	24.1507
K7ELQ4	Cyclic AMP-dependent transcription factor ATF-7	ATF7	FGPART(0.196)DS(0.804)VIIADQT(0.994)PT(0.805)PT(0.201)R	S44	24.6598	25.2441	24.8398	21.0556	21.1414	21.0047
K7ELX0		CEP192	S(0.135)DLS(0.775)HT(0.276)S(0.814)LLENEK	S193	24.3423	24.4716	24.8499	21.1355	21.7854	23.5181
K7ELX0		CEP192	S(0.135)DLS(0.775)HT(0.276)S(0.814)LLENEK	S196	24.3423	24.4716	24.8499	21.3241	22.017	23.5181
K7ENL0	Septin-9	2019-09-09	SPKAS(1)LR	S74	24.351	24.7864	24.3639	21.3177	21.2674	21.6936
K7ER08	RNA-binding protein 42	RBM42	SHLDS(1)PEAR	S135	24.8999	24.5917	24.1218	23.1169	22.6196	21.586
K7EQY5	Non-specific protein-tyrosine kinase;Megakaryocyte-associated tyrosine-protein kinase	MATK	SAGAPASVSGQDADGS(0.001)T(0.229)S(0.77)PR	S500	20.8455	25.649	21.4841	25.7193	26.0774	25.9584
M0QY76	Tristetraprolin	ZFP36	STS(0.999)LVEGR	S66	23.9447	23.786	23.4055	22.142	21.6372	21.5253
M0QZ22	Protein Smaug homolog 2	SAMD4B	S(0.152)MS(0.848)LIPTSPQVPGEWPSPEELGAR	S238	25.6498	25.0763	25.4359	22.5963	23.2321	21.6117
M0R0P8	Unconventional myosin-IXb	MYO9B	KKPGDASSLPDAGLS(0.997)PGS(0.003)QVDSK	S1405	24.8694	24.9077	24.7997	22.3147	21.5446	22.5837
M0R165	Epidermal growth factor receptor substrate 15-like 1	EPS15L1	STPS(0.007)HGS(0.983)VS(0.009)S(0.009)LNS(0.013)T(0.032)GS(0.068)LS(0.879)PK	S244	22.0094	20.9106	21.3366	23.58	23.412	23.3879
M0R3F6	SURP and G-patch domain-containing protein 2	SUGP2	NT(0.001)PS(0.998)PDVT(0.001)LGTNPGTEDIQFPIQK	S277	24.7257	23.7659	25.1695	22.3425	20.9834	22.6476
O00418	Eukaryotic elongation factor 2 kinase	EEF2K	LHLPRAS(1)AVALEVQR	S500	25.189	25.2758	24.9892	22.119	21.8515	20.6588
O14497	AT-rich interactive domain-containing protein 1A	ARID1A	FPPPQELS(0.861)QDS(0.139)FGSQASSAPSMTSSK	S604	21.0432	20.7717	20.8432	24.5833	23.3124	23.6421
O14545	TRAF-type zinc finger domain-containing protein 1	TRAFD1	ALPSLNT(0.125)GS(0.833)S(0.09)S(0.951)PR	S327	31.0186	24.4551	25.0027	30.5675	30.8445	30.5928
O14545	TRAF-type zinc finger domain-containing protein 1	TRAFD1	LDS(1)QPQET(0.09)S(0.91)PELPR	S409	25.8797	26.209	25.9318	20.9956	21.7289	24.1486
O14681	Etoposide-induced protein 2.4 homolog	EI24	RAS(0.915)S(0.085)VLAQR	S46	27.5828	27.4024	27.5512	23.3598	23.7152	23.7529
O14686	Histone-lysine N-methyltransferase 2D	KMT2D	SGIT(0.01)S(0.99)PVEKR	S2640	26.7771	26.2348	26.6155	24.3481	23.7211	23.7443
O14974	Protein phosphatase 1 regulatory subunit 12A	PPP1R12A	DKKS(1)PLIESTANMDNNQSQK	S299	25.9709	26.4851	26.0547	20.9609	21.8261	22.1267
O14974	Protein phosphatase 1 regulatory subunit 12A	PPP1R12A	KT(0.001)GS(0.999)YGALAEITASK	S445	22.789	21.968	22.7945	26.6034	25.8383	25.5522
O14974	Protein phosphatase 1 regulatory subunit 12A	PPP1R12A	SGS(1)YSYLEER	S910	26.2228	26.4256	26.106	28.0941	28.3991	28.2287
O14980	Exportin-1	XPO1	QMS(1)VPGIFNPHEIPEEMCD	S1055	24.2105	24.548	24.1919	21.0334	21.1378	21.386
O15014	Zinc finger protein 609	ZNF609	TNS(1)MGSATGPLPGTK	S467	22.6054	22.5346	23.285	25.8396	25.1309	24.659
O15116	U6 snRNA-associated Sm-like protein LSm1	LSM1	GLS(1)IPRADTLDEY	S123	25.1308	24.8254	24.7069	20.5865	22.1505	22.0815
O15164	Transcription intermediary factor 1-alpha	TRIM24	YLMLPAPMLGSAETPPPVPAPGS(0.926)PVS(0.053)GS(0.016)S(0.004)PFATQVGVIR	S110	23.5025	25.3371	24.7301	22.0144	23.0562	21.4761
O15226	NF-kappa-B-repressing factor	NKRF	SES(0.996)HT(0.003)DLTFSR	S618	26.9334	26.4316	26.3433	23.6639	23.939	23.1142
O15357	Phosphatidylinositol 3,4,5-trisphosphate 5-phosphatase 2	INPPL1	VFDQQS(0.793)S(0.206)PMVT(0.001)R	S240	21.7757	20.9264	21.8568	25.2451	22.1879	24.716
O15525	Transcription factor MafG	MAFG	TVARS(1)PVAPAR	S124	25.2162	25.0123	24.5946	21.3248	24.3058	20.9423
O43166	Signal-induced proliferation-associated 1-like protein 1	SIPA1L1	S(0.027)KS(0.97)ET(0.003)GDSSIFR	S288	20.6835	21.0713	20.9876	23.2982	23.4386	23.3058
O43242	26S proteasome non-ATPase regulatory subunit 3	PSMD3	MKQEGS(1)AR	S6	23.9355	23.4553	23.8691	20.6536	22.4053	20.8194
O43379	WD repeat-containing protein 62	WDR62	LTLSSACDGLLQPPVDT(0.003)QPGVT(0.006)VPAVS(0.038)FPAPS(0.921)PVEES(0.031)ALR	S1325	26.2534	26.3433	25.5043	22.0086	25.0934	21.843
O43719	HIV Tat-specific factor 1	HTATSF1	RS(0.004)DS(0.989)VS(0.007)ASER	S387	26.9945	27.0145	26.43	23.506	24.8216	25.0575
O60271	C-Jun-amino-terminal kinase-interacting protein 4	SPAG9	ERPIS(1)LGIFPLPAGDGLLT(1)PDAQK	S203	24.2093	24.05	24.0275	21.0538	21.3223	21.4036
O60293	Zinc finger C3H1 domain-containing protein	ZFC3H1	S(1)FLESNYFTKPNLK	S1046	21.4403	21.8731	22.2607	23.7658	23.5781	23.8023
O60293	Zinc finger C3H1 domain-containing protein	ZFC3H1	T(0.002)S(0.002)S(0.001)S(0.009)S(0.985)PANSDVEIDGIGR	S805	21.2538	24.6218	24.743	26.8979	26.7348	26.816
O60293	Zinc finger C3H1 domain-containing protein	ZFC3H1	TSS(0.011)S(0.088)S(0.901)PANS(1)DVEIDGIGR	S809	21.2216	21.8073	21.8779	26.4973	26.9826	26.7713
O60318	Germinal-center associated nuclear protein	MCM3AP	EKKPGDGEVS(0.984)PS(0.012)T(0.004)EDAPFQHSPLGK	S527	26.28	26.3441	25.8757	24.1055	24.4132	24.1963
O60749	Sorting nexin-2	SNX2	SMS(1)APVIFDR	S119	23.7831	23.5811	24.0596	25.735	25.6853	26.1333
O60784	Target of Myb protein 1	TOM1	AADRLPNLS(0.059)S(0.939)PS(0.002)AEGPPGPPSGPAPR	S462	28.0298	27.6053	27.7558	22.0304	26.0296	25.9089
O60784	Target of Myb protein 1	TOM1	AGLQS(1)LEASGR	S355	24.3737	24.7109	24.401	22.6475	21.3706	22.0878
O75113	NEDD4-binding protein 1	N4BP1	NKAGT(1)PVS(1)ELTK	S245	24.1839	23.4908	24.1086	21.6443	19.7682	21.1008
O75179	Ankyrin repeat domain-containing protein 17	ANKRD17	APS(1)PAPSSVPLGSEKPSNVSQDR	S2401	23.0664	20.0554	25.0483	26.6595	25.9337	25.9463
O75367	Core histone macro-H2A.1	H2AFY	AAS(1)ADS(0.974)T(0.025)TEGTPADGFTVLSTK	S173	23.8597	20.5544	22.2606	23.9658	25.2338	25.2256
O75427	Leucine-rich repeat and calponin homology domain-containing protein 4	LRCH4	KDS(1)LLKPGLR	S432	24.1979	24.095	23.6784	21.9811	21.4486	21.582
O75427	Leucine-rich repeat and calponin homology domain-containing protein 4	LRCH4	S(0.353)S(0.353)S(0.285)QS(0.008)GS(0.004)GPS(0.136)S(0.824)PDS(0.035)VLRPR	S521	25.6174	25.9836	25.577	23.9531	22.0424	20.7088
O75475	PC4 and SFRS1-interacting protein	PSIP1	TGVT(0.001)S(0.016)T(0.219)S(0.766)DS(0.998)EEEGDDQEGEKKR	S273	28.4887	28.4723	28.3477	21.5554	21.1754	21.8423
O75592	E3 ubiquitin-protein ligase MYCBP2	MYCBP2	SYS(1)VVASEYDKQHSILPAR	S3440	25.2635	25.2277	25.8881	22.4366	23.6621	23.7681
O75683	Surfeit locus protein 6	SURF6	EPPGLIFNKVEVS(0.974)EDEPAS(0.026)K	S206	21.9419	21.7114	22.1831	24.0178	24.1476	23.8365
O75717	WD repeat and HMG-box DNA-binding protein 1	WDHD1	GIINDDEDDEDLMMAS(1)GRPR	S367	25.8209	25.5309	25.3839	21.0528	22.2961	20.9782
O94806	Serine/threonine-protein kinase D3;Serine/threonine-protein kinase;Serine/threonine-protein kinase D1	PRKD3;PRKD1	S(0.999)VVGT(0.001)PAYLAPEVLR	S735	23.5513	23.3076	23.0473	21.6336	21.2596	20.2797
O94826	Mitochondrial import receptor subunit TOM70	TOMM70A	AS(1)PAPGSGHPEGPGAHLDMNSLDR	S91	26.9318	26.343	26.93	29.8559	28.8849	28.2698
O95155	Ubiquitin conjugation factor E4 B	UBE4B	LAGGQT(0.114)S(0.886)QPT(0.319)T(0.681)PLT(0.057)S(0.943)PQR	S31	24.1836	23.6277	23.8525	21.3499	21.1726	21.6612
O95155	Ubiquitin conjugation factor E4 B	UBE4B	SQS(1)MDIDGVSCEK	S105	26.1763	26.9283	26.2609	24.3373	23.9892	24.4403
O95155	Ubiquitin conjugation factor E4 B	UBE4B	SQSS(0.003)EGVS(0.128)S(0.834)LS(0.035)S(0.044)S(0.952)PS(0.003)NSLETQSQSLSR	S84	22.3102	21.9772	25.2779	26.6376	26.7042	26.1233
O95155	Ubiquitin conjugation factor E4 B	UBE4B	SQSSEGVSSLSS(0.008)S(0.992)PS(0.001)NSLETQSQSLSR	S88	24.8301	22.8749	25.2779	26.9545	27.028	26.5483
O95155	Ubiquitin conjugation factor E4 B	UBE4B	SQSSEGVSSLSSSPSNSLETQS(0.004)QS(0.02)LS(0.976)R	S101	25.8641	26.0433	26.2589	24.0572	24.4522	20.5976
O95235	Kinesin-like protein KIF20A	KIF20A	TPTCQSST(0.002)DCS(0.998)PYAR	S867	25.8676	24.47	25.915	24.7668	20.4425	20.9519
O95243	Methyl-CpG-binding domain protein 4	MBD4	SLS(0.997)S(0.003)GSNFCSEQK	S318	21.8517	22.133	20.6798	24.0942	24.1472	24.0727
O95297	Myelin protein zero-like protein 1	MPZL1	KS(0.022)PS(0.961)DT(0.017)EGLVK	S221	21.2734	22.5306	23.0247	25.713	25.7121	24.6301
O95671	N-acetylserotonin O-methyltransferase-like protein	ASMTL	VVLAS(0.011)AS(0.989)PR	S21	27.0599	26.7759	26.6004	22.0548	26.9764	20.7087
O95810	Serum deprivation-response protein	SDPR	ISS(0.04)GKS(0.18)S(0.779)PFKVS(0.987)PLT(0.012)FGR	S293	20.7941	21.6992	21.3202	24.835	24.8438	24.5183
Q9NZH5	Securin-2;Securin	PTTG2;PTTG1	LFQLGPPS(1)PVK	S165	22.3765	23.2815	23.0828	26.0151	24.8439	24.3856
P00519	Tyrosine-protein kinase ABL1	ABL1	GQGES(1)DPLDHEPAVS(1)PLLPR	S569	24.6768	24.5337	24.5979	26.9565	26.5869	26.2652
P01106	Myc proto-oncogene protein	MYC	PLNVS(0.995)FT(0.005)NR	S6	21.7972	21.7319	21.5437	24.1926	24.3972	24.2601
P02786	Transferrin receptor protein 1;Transferrin receptor protein 1, serum form	TFRC	SAFSNLFGGEPLS(0.943)YT(0.057)R	S19	25.3552	25.3825	24.9764	22.9726	23.286	22.6299
P04792	Heat shock protein beta-1	HSPB1	ALS(1)RQLS(0.969)S(0.031)GVSEIR	S78	32.9502	32.9143	32.767	22.5931	27.7989	27.5162
P04792	Heat shock protein beta-1	HSPB1	QLS(0.954)S(0.965)GVS(0.081)EIR	S83	24.6739	24.8162	24.5807	21.5461	21.3724	21.8482
P04792	Heat shock protein beta-1	HSPB1	GPS(1)WDPFRDWYPHSR	S15	25.0538	24.8297	25.7706	23.5554	20.8534	20.9904
P04792	Heat shock protein beta-1	HSPB1	LAT(0.029)QS(0.971)NEITIPVTFESR	S176	24.4865	24.3253	24.8945	22.4263	22.3412	22.2272
P05387	60S acidic ribosomal protein P2	RPLP2	LASVPAGGAVAVS(0.001)AAPGS(0.995)AAPAAGS(0.005)APAAAEEK	S79	21.9732	20.9864	25.9446	26.8484	25.747	25.5895
P17535	Transcription factor AP-1;Transcription factor jun-D	JUN;JUND	LAS(1)PELER	S100	27.2159	27.1856	27.1898	25.169	25.1261	24.9704
P05783	Keratin, type I cytoskeletal 18	KRT18	PVSSAAS(1)VYAGAGGSGSR	S34	21.5579	21.6338	23.0416	28.0284	26.8777	26.9096
P05783	Keratin, type I cytoskeletal 18	KRT18	S(0.918)T(0.082)FSTNYR	S7	22.1462	24.6784	21.4938	24.9021	27.7242	27.1526
P06400	Retinoblastoma-associated protein	RB1	S(1)PYKFPS(0.796)S(0.204)PLR	S794	21.3719	25.3313	21.8774	26.2461	25.4367	25.0359
P06748	Nucleophosmin	NPM1	MEDSMDMDMS(1)PLRPQNYLFGCELK	S10	21.3928	21.0165	29.1161	29.0724	28.9653	28.934
P07910	Heterogeneous nuclear ribonucleoproteins C1/C2	HNRNPC	SAAEMYGSVTEHPS(0.034)PS(0.966)PLLSSSFDLDYDFQR	S115	20.9886	21.2497	22.0472	25.5938	25.609	25.0461
P08559	Pyruvate dehydrogenase E1 component subunit alpha, somatic form, mitochondrial;Pyruvate dehydrogenase E1 component subunit alpha, testis-specific form, mitochondrial	PDHA1;PDHA2	YHGHS(0.996)MS(0.004)DPGVS(0.999)Y(0.001)R	S300	24.5197	24.7273	24.7787	23.1709	20.7096	22.7813
P08670	Vimentin	VIM	ISLPLPNFS(0.062)S(0.938)LNLR	S420	26.3428	25.8075	26.1293	24.0048	23.8285	23.9952
P11274	Breakpoint cluster region protein	BCR	ISS(1)LGSQAMQMER	S202	22.2281	21.1522	21.4333	24.8359	24.5775	24.1944
P11388	DNA topoisomerase 2-alpha	TOP2A	S(1)VVS(1)DLEADDVK	S1374	27.0431	27.1954	27.1128	25.3769	23.6637	22.5158
P11717	Cation-independent mannose-6-phosphate receptor	IGF2R	LVS(1)FHDDS(1)DEDLLHI	S2479	21.6373	22.4627	23.0798	25.9799	25.4187	25.6024
P11717	Cation-independent mannose-6-phosphate receptor	IGF2R	LVSFHDDS(1)DEDLLHI	S2484	23.2554	22.4627	23.0798	25.9799	28.3797	25.6024
P13639	Elongation factor 2	EEF2	FSVS(1)PVVR	S502	25.4047	24.9499	24.998	23.3585	23.2999	22.8284
P15056	Serine/threonine-protein kinase B-raf	BRAF	S(0.005)S(0.005)S(0.99)APNVHINTIEPVNIDDLIR	S365	24.7261	21.3916	25.0879	27.0083	26.4377	25.9855
P15927	Replication protein A 32 kDa subunit	RPA2	MWNSGFESYGSSSYGGAGGYT(0.001)QS(0.015)PGGFGS(0.921)PAPS(0.064)QAEKK	S29	24.7813	24.7649	24.5043	23.9028	21.6657	21.1271
P16949	Stathmin	STMN1	RAS(1)GQAFELILSPR	S16	26.2079	25.8743	25.9537	27.9425	27.6387	27.7294
P17026	Zinc finger protein 22	ZNF22	FDS(0.034)S(0.932)FS(0.034)R	S42	20.9891	21.4914	21.8867	23.552	23.5659	23.6905
P17029	Zinc finger protein with KRAB and SCAN domains 1	ZKSCAN1	S(0.065)FS(0.931)LS(0.004)SNFTTPEEVPTGTK	S359	23.5201	23.9322	23.7302	22.0967	21.7594	20.8729
P17252	Protein kinase C alpha type	PRKCA	STLNPQWNES(0.958)FT(0.042)FK	S226	21.5192	20.9734	22.1092	24.8758	23.7962	23.6989
P17844	Probable ATP-dependent RNA helicase DDX5	DDX5	GYS(0.226)S(0.774)LLKR	S520	24.3847	23.3995	23.6746	21.7397	22.0019	21.61
P17858	ATP-dependent 6-phosphofructokinase, liver type	PFKL	TLS(1)MDKGF	S775	25.8758	26.1524	26.028	23.8567	23.9802	24.216
P18031	Tyrosine-protein phosphatase non-receptor type 1	PTPN1	DVS(1)PFDHSR	S50	24.8605	24.5854	24.7162	22.3513	22.7635	22.5396
P18615	Negative elongation factor E	NELFE	SDS(1)FPER	S251	24.9825	24.9913	24.676	22.6754	22.3625	21.9936
P18615	Negative elongation factor E	NELFE	S(0.004)LS(0.996)EQPVMDTATATEQAK	S51	28.8194	29.2693	28.911	25.6019	25.9336	26.283
P19338	Nucleolin	NCL	GFGFVDFNS(1)EEDAKAAK	S619	21.7123	21.7743	22.6821	24.1145	24.7775	23.929
P20700	Lamin-B1	LMNB1	VTVS(0.035)RAS(0.888)S(0.07)S(0.007)R	S404	24.8398	24.7742	23.9298	26.6105	27.8327	27.9588
P22102	Trifunctional purine biosynthetic protein adenosine-3;Phosphoribosylamine--glycine ligase;Phosphoribosylformylglycinamidine cyclo-ligase;Phosphoribosylglycinamide formyltransferase	GART	NGS(0.999)LT(0.001)NHFSFEK	S796	24.4781	23.9573	23.8266	20.7874	21.148	21.3145
P23769	Endothelial transcription factor GATA-2	GATA2	EVSPDPSTTGAAS(0.988)PAS(0.011)S(0.001)SAGGSAAR	S192	21.6921	21.4677	20.6033	23.971	23.0748	23.0663
P25054	Adenomatous polyposis coli protein	APC	VTPFNYNPS(1)PR	S2789	23.5767	23.4002	23.5754	21.3495	21.5739	21.7808
P28066	Proteasome subunit alpha type-5	PSMA5	ITS(1)PLMEPSSIEK	S56	28.2399	27.1783	28.2276	25.1693	25.262	25.2576
P33981	Dual specificity protein kinase TTK	TTK	TPS(1)SNTLDDYMSCFR	S455	21.8243	20.9624	21.5036	24.0776	23.9277	24.2186
P33981	Dual specificity protein kinase TTK	TTK	VPVNLLNS(1)PDCDVK	S281	26.2135	25.9684	26.2344	21.6206	24.0008	22.1357
P33991	DNA replication licensing factor MCM4	MCM4	S(0.152)S(0.848)PASTPSRR	S3	27.7462	26.4046	27.6127	25.7215	23.0184	20.7278
P35251	Replication factor C subunit 1	RFC1	ELS(0.998)QNT(0.001)DESGLNDEAIAK	S190	24.0074	23.7156	22.9745	20.8318	20.5007	21.6117
P37802	Transgelin-2	TAGLN2	NFS(1)DNQLQEGK	S163	25.8941	25.8095	25.8542	29.1906	28.8739	28.6291
P38159	RNA-binding motif protein, X chromosome;RNA-binding motif protein, X chromosome, N-terminally processed	RBMX	DS(0.002)YS(0.796)S(0.162)S(0.036)RS(0.004)DLYSSGR	S328	22.818	21.572	21.6651	24.277	24.3572	24.539
P38159	RNA-binding motif protein, X chromosome;RNA-binding motif protein, X chromosome, N-terminally processed	RBMX	SDLYS(0.774)S(0.226)GRDR	S336	23.0037	21.1665	22.172	24.0438	24.6066	24.3012
P41440	Folate transporter 1	SLC19A1	CET(0.017)S(0.983)ASELER	S223	22.024	24.1186	23.8532	25.9702	25.9979	26.0722
P42356	Phosphatidylinositol 4-kinase alpha	PI4KA	S(1)NLDITVGSR	S1436	23.8563	23.5692	23.3961	25.3458	25.6245	25.4305
P43487	Ran-specific GTPase-activating protein	RANBP1	FAS(1)ENDLPEWKER	S60	29.6634	29.0319	29.5468	27.195	25.8105	25.4862
P45973	Chromobox protein homolog 5	CBX5	S(1)NFSNSADDIK	S92	21.6805	21.3715	21.7763	24.3395	23.147	23.4294
P45985	Dual specificity mitogen-activated protein kinase kinase 4	MAP2K4	ILDQMPAT(0.836)PS(0.25)S(0.914)PMYVD	S394	23.513	24.0781	23.9689	21.8567	22.299	21.0463
P46013	Antigen KI-67	MKI67	IACKS(1)PPPESMDTPTSTR	S2105	20.2999	23.2451	23.0832	25.1689	26.4496	25.3742
P46013	Antigen KI-67	MKI67	IACKS(1)PQPDPVDTPASTK	S2344	23.9425	23.6675	20.4108	25.8542	25.0757	24.9637
P46013	Antigen KI-67	MKI67	LTQTS(0.013)GQS(0.034)T(0.034)HT(0.097)HKEPAS(0.822)GDEGIKVLK	S2638	20.984	22.978	21.294	23.3419	25.9115	25.1179
P46013	Antigen KI-67	MKI67	S(0.996)GAS(0.004)EANLIVAK	S648	21.2429	20.7544	21.3507	25.6275	25.3911	25.0769
P48357	Leptin receptor	LEPR	NCS(1)WAQGLNFQK	S882	21.5091	21.703	23.04	24.2471	24.3042	23.8885
P48634	Protein PRRC2A	PRRC2A	KQS(0.98)S(0.02)SEISLAVER	S456	27.4777	27.1167	27.2852	20.8031	25.9309	22.3991
P48651	Phosphatidylserine synthase 1	PTDSS1	TLS(1)KDDVNYK	S11	26.1517	25.7778	25.4472	23.1265	22.1031	23.5354
P49006	MARCKS-related protein	MARCKSL1	GAEAS(0.013)AAS(0.987)EEEAGPQATEPSTPSGPESGPTPASAEQNE	S165	21.3665	21.1482	22.2846	25.758	25.8992	25.98
P49207	60S ribosomal protein L34	RPL34	RLS(0.99)Y(0.001)NT(0.009)ASNK	S12	25.6364	25.9458	25.8183	21.236	23.1254	21.9386
P49454	Centromere protein F	CENPF	DFS(1)ASYFSGEQEVTPSR	S242	25.4353	25.2911	25.4288	20.9385	22.1316	21.554
P49756	RNA-binding protein 25	RBM25	LGAS(0.001)NS(0.999)PGQPNS(1)VKRK	S683	26.368	24.7882	24.4894	21.342	24.2713	21.1691
P49790	Nuclear pore complex protein Nup153	NUP153	RIPS(1)IVS(0.502)S(0.502)PLNS(0.997)PLDR	S330	24.3097	24.9736	24.0075	21.6241	21.8339	22.1481
P49792	E3 SUMO-protein ligase RanBP2	RANBP2	CVACQNPDKPS(0.941)PS(0.039)T(0.008)S(0.011)VPAPASFK	S1573	27.1307	26.9352	26.8731	22.2402	25.7996	21.795
P49792	E3 SUMO-protein ligase RanBP2	RANBP2	SGSSFVHQAS(1)FK	S1456	24.8623	24.4269	24.6285	21.6081	21.3022	21.1504
P49792	E3 SUMO-protein ligase RanBP2	RANBP2	SIS(0.996)S(0.004)PSVSSETMDKPVDLSTRK	S2804	22.0683	26.2085	22.3523	26.7002	26.8602	27.0404
P49916	DNA ligase 3	LIG3	LATKS(0.942)S(0.058)PVKVGEK	S912	28.0181	27.9496	27.744	26.8196	21.9585	21.7327
P50402	Emerin	EMD	DSAYQSIT(0.003)HYRPVS(0.801)AS(0.196)R	S171	26.5571	26.3488	21.5745	27.8215	27.975	28.2624
P51610	Host cell factor 1;HCF N-terminal chain 1;HCF N-terminal chain 2;HCF N-terminal chain 3;HCF N-terminal chain 4;HCF N-terminal chain 5;HCF N-terminal chain 6;HCF C-terminal chain 1;HCF C-terminal chain 2;HCF C-terminal chain 3;HCF C-terminal chain 4;HCF C-terminal chain 5;HCF C-terminal chain 6	HCFC1	TITLVKS(1)PISVPGGSALISNLGK	S666	26.6926	26.5096	26.03	24.048	23.4167	23.7594
P51610	Host cell factor 1;HCF N-terminal chain 1;HCF N-terminal chain 2;HCF N-terminal chain 3;HCF N-terminal chain 4;HCF N-terminal chain 5;HCF N-terminal chain 6;HCF C-terminal chain 1;HCF C-terminal chain 2;HCF C-terminal chain 3;HCF C-terminal chain 4;HCF C-terminal chain 5;HCF C-terminal chain 6	HCFC1	VAS(0.027)S(0.973)PVMVSNPATR	S598	27.9554	27.9871	27.8153	25.5706	25.5925	25.8054
P51991	Heterogeneous nuclear ribonucleoprotein A3	HNRNPA3	AVS(0.968)REDS(0.032)VKPGAHLTVK	S112	25.5503	25.2186	26.202	21.2335	21.347	20.5921
P52292	Importin subunit alpha-1	KPNA2	ASLS(1)LIEK	S490	25.808	25.658	25.7531	23.1941	22.7962	22.5529
P52306	Rap1 GTPase-GDP dissociation stimulator 1	RAP1GDS1	SVAQQAS(0.793)LT(0.207)EQR	S597	24.0657	23.6272	23.9921	21.4357	22.4115	22.1159
P54198	Protein HIRA	HIRA	DLLES(0.971)S(0.889)S(0.57)DS(0.57)DEKVPLAK	S610	20.9209	23.5924	23.2252	26.0519	26.5115	25.8895
P55010	Eukaryotic translation initiation factor 5	EIF5	SVS(1)DQFYR	S10	27.0703	26.8592	26.9315	24.3667	24.1116	23.8292
P55884	Eukaryotic translation initiation factor 3 subunit B	EIF3B	S(0.848)DS(0.152)RAQAVSEDAGGNEGR	S117	21.5886	26.2228	25.0241	27.4951	28.3463	28.6787
P55884	Eukaryotic translation initiation factor 3 subunit B	EIF3B	S(0.065)DS(0.935)RAQAVSEDAGGNEGR	S119	21.2212	21.8712	21.9399	24.4063	26.3329	26.11
P60228	Eukaryotic translation initiation factor 3 subunit E	EIF3E	SEAPNWAT(0.005)QDS(0.995)GFY	S442	24.0667	24.2232	24.6058	21.7443	21.2117	21.7528
P62753	40S ribosomal protein S6	RPS6	RLS(1)S(0.999)LRAS(0.001)TSK	S235	26.8022	25.9706	25.9083	30.2987	30.1341	29.9821
P62753	40S ribosomal protein S6	RPS6	RLS(1)S(1)LRAS(0.926)T(0.065)S(0.009)K	S236	27.6481	27.6993	27.1953	30.0341	29.4359	29.495
P62753	40S ribosomal protein S6	RPS6	LS(0.425)S(0.575)LRAS(0.961)T(0.016)S(0.024)KS(0.998)ES(0.001)SQK	S240	26.8248	26.9338	26.765	30.4158	29.8149	29.9798
P62753	40S ribosomal protein S6	RPS6	LS(0.012)S(0.015)LRAS(0.763)T(0.507)S(0.704)KS(0.99)ES(0.021)S(0.989)QK	S247	26.4039	26.3465	26.4126	29.1676	29.1931	29.3253
P62995	Transformer-2 protein homolog beta	TRA2B	S(0.94)RS(0.678)Y(0.473)S(0.518)RDY(0.39)R	S83	25.791	21.7714	20.8954	27.4677	27.1789	27.1276
Q00013	55 kDa erythrocyte membrane protein	MPP1	VASMAQSAPSEAPS(0.956)CS(0.044)PFGK	S241	26.1243	26.4432	26.4005	24.1045	22.2748	23.7743
Q00013	55 kDa erythrocyte membrane protein	MPP1	VASMAQSAPS(0.004)EAPS(0.22)CS(0.776)PFGK	S243	26.6078	26.1356	26.5338	22.4956	24.6955	23.5892
Q02880	DNA topoisomerase 2-beta	TOP2B	SQDFGNLFSFPS(0.95)YS(0.05)QK	S1452	25.2404	24.9516	24.8659	21.4686	21.4097	21.2316
Q03164	Histone-lysine N-methyltransferase 2A;MLL cleavage product N320;MLL cleavage product C180	KMT2A	S(0.011)ET(0.996)KS(0.993)GDKIK	S206	21.5458	26.2976	22.1138	27.5675	27.1788	27.2068
Q03188	Centromere protein C	CENPC	S(1)WITIPR	S316	20.449	20.6085	21.1159	24.2786	22.5757	22.0213
Q03188	Centromere protein C	CENPC	TSVLEES(0.949)GPS(0.051)R	S684	21.6605	21.6873	23.6093	25.2016	24.2688	24.6826
Q04637	Eukaryotic translation initiation factor 4 gamma 1	EIF4G1	AAS(1)LTEDRDR	S1209	28.066	27.757	27.9817	26.1177	26.2448	25.9893
Q04637	Eukaryotic translation initiation factor 4 gamma 1	EIF4G1	VVQRS(0.128)S(0.872)LSR	S1145	26.2542	26.5408	26.4372	21.8437	26.5251	21.3791
Q07666	KH domain-containing, RNA-binding, signal transduction-associated protein 1	KHDRBS1	S(0.005)GS(0.995)MDPSGAHPSVR	S20	26.5246	25.476	26.6106	28.8628	29.0052	28.9133
Q09666	Neuroblast differentiation-associated protein AHNAK	AHNAK	ASLGS(1)LEGEAEAEASSPK	S5752	21.3424	22.6063	21.4743	24.3918	24.4997	24.1176
Q0JRZ9	F-BAR domain only protein 2	FCHO2	VSIGNIT(0.003)LS(0.993)PAIS(0.634)RHS(0.37)PVQMNR	S387	19.8067	20.6702	21.4761	25.4445	24.6154	24.5961
Q12888	Tumor suppressor p53-binding protein 1	TP53BP1	LSDVDANTAIKHEEQS(1)NEDIPIAEQSSK	S222	24.4245	23.6841	24.4966	21.6196	21.4737	22.9865
Q12906	Interleukin enhancer-binding factor 3	ILF3	FNY(0.002)S(0.919)GS(0.079)GGR	S810	25.3949	25.3584	25.1774	21.4959	23.8694	20.9557
Q13085	Acetyl-CoA carboxylase 1;Biotin carboxylase	ACACA	SSMS(1)GLHLVK	S80	25.0799	25.2565	24.6785	28.45	28.4917	28.5107
Q13111	Chromatin assembly factor 1 subunit A	CHAF1A	GLLS(0.036)NHT(0.429)GS(0.555)PRS(0.902)PS(0.018)T(0.016)T(0.015)Y(0.028)LHTPTPSEDAAIPSK	S775	24.5556	24.9026	21.013	26.1532	26.6596	26.5678
Q13111	Chromatin assembly factor 1 subunit A	CHAF1A	LIS(1)ENSVYEK	S803	25.496	25.2378	25.2513	21.7188	21.0026	22.313
Q13136	Liprin-alpha-1;Liprin-alpha-4	PPFIA1;PPFIA4	CET(0.004)S(0.987)PPS(0.007)S(0.002)PR	S741	24.3138	24.1975	24.5759	22.4537	22.3708	22.4447
Q13136	Liprin-alpha-1	PPFIA1	VTSS(0.001)MS(0.062)S(0.874)PS(0.062)MQPK	S1172	22.7727	23.6914	20.831	26.4338	26.443	25.6909
Q13137	Calcium-binding and coiled-coil domain-containing protein 2	CALCOCO2	LLSYMGLDFNS(1)LPYQVPTSDEGGAR	S355	24.3642	24.2708	24.4797	22.653	22.0869	21.8642
Q13177	Serine/threonine-protein kinase PAK 2;PAK-2p27;PAK-2p34	PAK2	IISIFS(0.996)GT(0.004)EK	S58	25.3548	26.7496	26.4402	22.3976	22.2432	22.1883
Q13242	Serine/arginine-rich splicing factor 9	SRSF9	GS(1)PHYFS(1)PFRPY	S211	25.7337	26.7116	28.1148	29.5653	30.3929	29.4587
Q13322	Growth factor receptor-bound protein 10	GRB10	MNILGS(0.998)QS(0.997)PLHPS(0.002)T(0.002)LS(0.001)T(0.001)VIHR	S474	21.7916	20.747	22.3186	23.9458	24.5522	24.0904
Q13370	cGMP-inhibited 3',5'-cyclic phosphodiesterase B	PDE3B	RS(0.2)S(0.772)GT(0.027)S(0.001)GLLPVEQSSR	S442	24.2538	23.9581	24.1245	22.4078	22.6208	21.4004
Q13469	Nuclear factor of activated T-cells, cytoplasmic 2	NFATC2	TGLS(0.023)S(0.977)PDAR	S737	24.7177	25.1791	24.8218	22.5074	21.7455	21.3884
Q13501	Sequestosome-1	SQSTM1	EVDPS(0.001)T(0.001)GELQS(0.998)LQMPES(0.001)EGPS(0.297)S(0.698)LDPS(0.004)QEGPTGLK	S355	26.7091	26.8923	26.2868	21.7998	22.7034	21.7825
Q13501	Sequestosome-1	SQSTM1	EVDPSTGELQSLQMPES(0.955)EGPS(0.278)S(0.73)LDPS(0.037)QEGPTGLK	S361	26.0232	26.7724	25.5324	22.4673	21.701	21.5151
Q13501	Sequestosome-1	SQSTM1	LIESLS(0.007)QMLS(0.989)MGFS(0.004)DEGGWLTR	S403	23.9888	23.3399	23.9205	21.6824	20.6175	20.6899
Q13546	Receptor-interacting serine/threonine-protein kinase 1	RIPK1	RMQS(1)LQLDCVAVPSSR	S320	28.1915	27.9331	28.2218	24.4836	24.3734	24.0531
Q13546	Receptor-interacting serine/threonine-protein kinase 1	RIPK1	MQS(1)LQLDCVAVPS(0.862)S(0.138)R	S330	25.8238	25.8705	26.0086	22.7354	21.833	21.7299
Q13546	Receptor-interacting serine/threonine-protein kinase 1	RIPK1	RVS(1)HDPFAQQRPYENFQNTEGK	S416	24.061	23.3525	23.0372	22.006	20.9462	21.0194
Q13610	Periodic tryptophan protein 1 homolog	PWP1	NS(0.001)S(0.999)ISGPFGSR	S485	26.4844	26.3561	26.2187	24.0048	23.8388	23.6531
Q13625	Apoptosis-stimulating of p53 protein 2	TP53BP2	NQS(1)SEDILR	S480	24.2844	23.9572	24.1627	26.2488	26.5931	26.2114
Q13625	Apoptosis-stimulating of p53 protein 2	TP53BP2	RS(0.761)S(0.166)IT(0.073)EPEGPNGPNIQK	S736	21.5248	20.8318	21.7187	24.9364	24.8653	24.6471
Q13625	Apoptosis-stimulating of p53 protein 2	TP53BP2	RS(0.148)S(0.825)IT(0.027)EPEGPNGPNIQK	S737	23.3789	21.6287	23.4911	25.2312	25.4508	24.9587
Q14004	Cyclin-dependent kinase 13	CDK13	S(0.292)RKS(0.734)PS(0.974)PAGGGS(0.467)S(0.411)PY(0.004)S(0.118)R	S342	24.3623	24.3582	24.0148	20.2169	21.2313	23.6392
Q14151	Scaffold attachment factor B2	SAFB2	DGWGGYGSDKRLS(1)EGR	S832	22.5096	26.4698	21.3313	25.7351	27.6625	27.4428
Q14153	Protein FAM53B	FAM53B	SLS(1)FSDEMSSCR	S118	21.5305	21.5989	22.2361	24.0714	24.2337	24.4899
Q14153	Protein FAM53B	FAM53B	SSS(1)FSLPSR	S167	24.4378	24.3027	24.5511	26.3608	26.1849	26.4426
Q14315	Filamin-C	FLNC	LGSFGS(0.827)IT(0.173)R	S2236	23.4635	23.0745	22.8334	21.07	21.2597	21.3046
Q14684	Ribosomal RNA processing protein 1 homolog B	RRP1B	SILVS(0.995)PT(0.003)GPS(0.002)R	S706	28.1422	27.8493	27.9274	22.9145	23.2787	23.3195
Q14694	Ubiquitin carboxyl-terminal hydrolase 10	USP10	T(0.127)PS(0.833)YS(0.04)ISSTLNPQAPEFILGCTASK	S76	24.3424	21.4826	24.0194	26.9365	26.9834	27.0499
Q14789	Golgin subfamily B member 1	GOLGB1	QAS(0.985)PET(0.012)S(0.003)ASPDGSQNLVYETELLR	S3010	23.1191	24.2635	23.0436	21.7448	21.4631	21.0284
Q15036	Sorting nexin-17	SNX17	LSS(0.002)KLS(0.998)AVS(1)LR	S437	21.8065	21.9006	21.4333	26.8178	27.0015	26.9112
Q15036	Sorting nexin-17	SNX17	LSAVS(1)LR	S440	21.9275	21.3599	21.8823	26.123	26.3504	26.0943
Q15056	Eukaryotic translation initiation factor 4H	EIF4H	AY(0.001)S(0.084)S(0.915)FGGGR	S14	24.9082	25.0459	24.9513	23.276	22.8114	22.9573
Q15181	Inorganic pyrophosphatase	PPA1	GISCMNTT(0.008)LS(0.768)ES(0.223)PFKCDPDAAR	S248	24.5647	26.5619	24.467	20.6439	23.3721	23.3467
Q15388	Mitochondrial import receptor subunit TOM20 homolog	TOMM20	IVS(1)AQS(1)LAEDDVE	S135	24.9889	24.5185	24.3843	26.6432	26.4528	26.4293
Q15424	Scaffold attachment factor B1	SAFB	MSS(1)PEDDSDTKR	S384	24.3416	24.8507	24.3071	21.7372	21.0151	20.9363
Q15424	Scaffold attachment factor B1	SAFB	S(1)VVS(1)FDKVKEPR	S601	25.5152	25.2001	25.3224	28.677	27.9637	27.7178
Q15424	Scaffold attachment factor B1	SAFB	S(1)VVS(1)FDKVKEPR	S604	26.4647	26.1028	26.1994	29.1497	28.3494	28.1354
Q15545	Transcription initiation factor TFIID subunit 7	TAF7	LLS(0.996)T(0.004)DAEAVSTR	S171	24.2385	23.5832	23.5786	21.705	22.0113	21.8515
Q15751	Probable E3 ubiquitin-protein ligase HERC1	HERC1	SES(1)LTAESR	S1491	25.4029	26.1395	25.2146	23.2244	23.258	22.009
Q15758	Neutral amino acid transporter B(0);Amino acid transporter	SLC1A5	GPAGDATVAS(1)EKESVM	S535	21.3805	21.6584	20.9565	24.017	25.0564	26.0489
Q15758	Neutral amino acid transporter B(0);Amino acid transporter	SLC1A5	STEPELIQVKS(1)ELPLDPLPVPTEEGNPLLK	S503	21.7675	21.9132	21.6916	27.0016	27.4754	26.6174
Q15910	Histone-lysine N-methyltransferase EZH2	EZH2	LPNNS(0.101)S(0.248)RPS(0.758)T(0.86)PT(0.033)INVLESK	S366	24.6431	24.7757	24.4512	22.5383	21.6953	22.3212
Q16204	Coiled-coil domain-containing protein 6	CCDC6	TVS(0.177)S(0.823)PIPYT(0.012)PS(0.252)PS(0.212)S(0.195)S(0.179)RPIS(0.128)PGLS(0.017)YAS(0.004)HTVGFTPPTSLTR	S352	21.7847	26.3753	23.1485	25.3873	27.5784	27.3058
Q16512	Serine/threonine-protein kinase N1	PKN1	LNLGTDS(0.001)DS(0.879)S(0.12)PQK	S561	21.0951	21.5913	21.7124	27.0573	21.8062	25.7038
Q16512	Serine/threonine-protein kinase N1	PKN1	LNLGTDS(0.006)DS(0.203)S(0.791)PQK	S562	26.0046	25.6794	25.9404	21.3153	21.0785	20.7287
Q16629	Serine/arginine-rich splicing factor 7	SRSF7	S(1)RS(1)AS(1)LRR	S171	26.7206	25.643	26.4528	26.1511	22.5154	21.1873
Q16629	Serine/arginine-rich splicing factor 7	SRSF7	S(1)RS(1)AS(1)LRR	S173	26.7206	25.643	26.4528	26.1511	20.5068	20.8688
Q16629	Serine/arginine-rich splicing factor 7	SRSF7	S(1)RS(1)AS(1)LRR	S175	26.7206	25.643	26.4528	26.1511	21.2839	21.0526
Q1ED39	Lysine-rich nucleolar protein 1	KNOP1	YSVLNNDDYFADVS(1)PLR	S42	22.2314	21.3233	21.6298	25.9796	24.3499	24.4404
Q1RLN5	Rho GTPase-activating protein 12	ARHGAP12	TSFSQEQSCDS(0.999)AGEGS(0.001)ER	S201	21.4292	22.3757	20.9457	24.6172	23.5164	23.4197
Q3B726	DNA-directed RNA polymerase I subunit RPA43	TWISTNB	KHS(0.974)EEAEFT(0.028)PPLKCS(0.998)PK	S328	23.779	26.0992	25.5683	22.3797	21.4469	20.9724
Q3V6T2	Girdin	CCDC88A	TSELSEAPQKS(1)LGHEVNELTSSR	S449	24.5165	24.6469	24.3292	20.7532	22.6328	21.3772
Q4G0J3	La-related protein 7	LARP7	SSS(1)EDAESLAPR	S300	21.0829	26.1544	21.1826	27.6605	27.4976	27.3694
Q4VC44	FLYWCH-type zinc finger-containing protein 1	FLYWCH1	TCS(0.999)PES(0.001)QQIYGDIK	S696	21.7051	21.7378	21.3128	24.6267	24.4078	23.3515
Q53EL6	Programmed cell death protein 4	PDCD4	DS(0.009)GRGDS(0.978)VS(0.962)DS(0.035)GS(0.016)DALR	S76	21.3945	23.5965	21.6437	26.7378	26.5292	23.2964
Q53ET0	CREB-regulated transcription coactivator 2	CRTC2	HGS(1)GPNIILTGDSSPGFSK	S613	20.8869	21.1254	21.1377	25.1343	22.3787	24.5946
Q53EU6	Glycerol-3-phosphate acyltransferase 3	AGPAT9	NSAS(1)VGIIQR	S68	21.6872	22.512	22.9429	29.2158	28.4587	28.4973
Q53H80	Akirin-2	AKIRIN2	CAPLSAPTSAAASPLSAAAATAASFSAAAAS(1)PQK	S57	22.2231	20.7609	22.3666	24.4291	24.421	23.9459
Q56NI9	N-acetyltransferase ESCO2	ESCO2	TTEINRLPS(0.001)ANQGS(0.999)PFK	S75	21.496	20.5179	22.2849	24.0127	23.472	23.7788
Q5SNT2	Transmembrane protein 201	TMEM201	RT(0.034)S(0.956)PS(0.005)S(0.005)LPGR	S441	25.9071	21.9339	20.3197	26.4809	26.9798	27.0487
Q5SZ59	OTU domain-containing protein 7B	OTUD7B	GIS(1)HASSSIVSLAR	S100	24.9603	24.9416	24.2713	22.5648	23.2191	22.5233
Q5T200	Zinc finger CCCH domain-containing protein 13	ZC3H13	KEVS(1)PEVVR	S198	28.4554	28.2584	27.958	21.9534	21.0982	20.4371
Q5T200	Zinc finger CCCH domain-containing protein 13	ZC3H13	LIS(0.999)DS(0.001)VER	S1364	22.2549	22.3017	22.0058	25.1699	24.5647	25.2056
Q5T3J3	Ligand-dependent nuclear receptor-interacting factor 1	LRIF1	DTLQTVS(0.003)S(0.038)S(0.921)PVT(0.038)EISR	S402	26.5144	26.477	26.5466	22.5699	21.5829	21.5862
Q5T4S7	E3 ubiquitin-protein ligase UBR4	UBR4	ALS(1)VLGCGHTSSTK	S3860	24.7915	24.6972	24.6	21.2454	21.2811	21.2861
Q5T5Y3	Calmodulin-regulated spectrin-associated protein 1	CAMSAP1	RPS(1)EGPQPLVR	S629	25.1234	24.9072	24.3183	20.9161	22.5602	21.921
Q5UIP0	Telomere-associated protein RIF1	RIF1	ASQGLLSS(0.004)IENS(0.989)ES(0.932)DS(0.059)S(0.016)EAKEEGSR	S1552	22.9331	21.1469	22.3081	25.3772	25.2514	24.7723
Q5UIP0	Telomere-associated protein RIF1	RIF1	ASQGLLSS(0.004)IENS(0.989)ES(0.932)DS(0.059)S(0.016)EAKEEGSR	S1554	22.9331	21.1759	22.9693	25.3772	25.2514	24.7723
Q5UIP0	Telomere-associated protein RIF1	RIF1	ATSEEDVS(1)IKS(1)PICEK	S1613	24.3465	24.4166	24.6338	22.9663	21.4027	22.0682
Q5UIP0	Telomere-associated protein RIF1	RIF1	ENTPPVVISADQMVNEDS(0.999)QVQITPNQK	S1403	24.8527	24.8329	24.9432	24.0206	21.999	21.8802
Q5UIP0	Telomere-associated protein RIF1	RIF1	RVS(1)FADPIYQAGLADDIDRR	S2205	26.8086	26.4809	26.6326	21.7431	24.4901	24.2209
Q5UIP0	Telomere-associated protein RIF1	RIF1	TVNGIENKS(1)LS(1)PDEER	S2391	24.3207	24.6057	24.0846	21.5262	23.0654	22.2545
Q5VT52	Regulation of nuclear pre-mRNA domain-containing protein 2	RPRD2	GNEPGS(0.033)DRS(0.957)PS(0.823)PS(0.187)KNDSFFTPDSNHNSLSQSTTGHLSLPQK	S928	20.9598	21.4326	21.4825	26.7609	24.7144	25.749
Q5VT52	Regulation of nuclear pre-mRNA domain-containing protein 2	RPRD2	GNEPGS(0.384)DRS(0.692)PS(0.841)PS(0.082)KNDS(0.001)FFTPDSNHNSLSQSTTGHLSLPQK	S930	21.207	22.0534	21.3453	26.7609	24.7144	25.749
Q5VUA4	Zinc finger protein 318	ZNF318	ERS(1)KDFQVK	S1945	24.0078	24.337	23.703	21.589	22.2794	22.1039
Q5VUA4	Zinc finger protein 318	ZNF318	HTDFLLPHERAS(0.995)QDGS(0.002)GFS(0.003)R	S501	21.7523	22.9398	22.0062	24.1779	24.224	24.8944
Q5VUA4	Zinc finger protein 318	ZNF318	YISQEEGPLS(1)PFLGQLDEDYR	S214	23.3676	21.8636	20.4035	24.6489	24.2748	24.1268
Q66K14	TBC1 domain family member 9B	TBC1D9B	QFS(0.541)T(0.512)AS(0.947)DHEQPGVSG	S1241	25.126	24.831	24.8354	21.9357	22.3784	21.1517
Q66K64	DDB1- and CUL4-associated factor 15	DCAF15	S(0.039)S(0.039)GS(0.92)PEPS(0.001)PAIAK	S310	21.2993	20.8251	20.7858	26.68	26.0945	27.2613
Q68E01	Integrator complex subunit 3	INTS3	AALS(0.054)S(0.946)PR	S995	28.7976	28.6401	28.633	22.1846	21.0922	26.6141
Q69YN4	Protein virilizer homolog	KIAA1429	SFLSEPS(0.036)S(0.964)PGR	S1579	22.3278	21.3472	27.3221	26.8904	27.7929	27.745
Q6AI12	Ankyrin repeat domain-containing protein 40	ANKRD40	RAS(1)KLTY	S364	25.1592	25.1032	25.5911	21.2265	22.8677	21.7969
Q6IN85	Serine/threonine-protein phosphatase 4 regulatory subunit 3A	SMEK1	TNLTSQSSTTNLPGSPGS(0.185)PGS(0.838)PGS(0.672)PGS(0.248)PGS(0.056)VPK	S774	20.854	21.3992	20.8977	25.901	25.9837	25.4251
Q6IN85	Serine/threonine-protein phosphatase 4 regulatory subunit 3A	SMEK1	TNLTSQSSTTNLPGSPGS(0.017)PGS(0.295)PGS(0.836)PGS(0.712)PGS(0.139)VPK	S777	22.9115	19.9788	21.3237	26.0131	26.5816	26.6895
Q6IQ22	Ras-related protein Rab-12	RAB12	AGGGGGLGAGS(1)PALSGGQGR	S21	22.8993	21.8042	21.2632	25.1731	24.5381	24.7918
Q6JBY9	CapZ-interacting protein	RCSD1	S(0.994)QS(0.006)DCGELGDFR	S177	21.2865	21.4054	21.9833	26.2093	25.9847	25.7323
Q6JBY9	CapZ-interacting protein	RCSD1	RS(0.077)S(0.923)EEVDGQHPAQEEVPES(0.981)PQT(0.015)S(0.004)GPEAENR	S268	25.3446	25.7206	25.4977	23.9473	23.8593	21.6408
Q6KC79	Nipped-B-like protein	NIPBL	GSRPPLILQS(0.014)QS(0.986)LPCSSPR	S301	26.2193	26.0971	26.0977	21.9835	19.9499	21.2613
Q6P1N0	Coiled-coil and C2 domain-containing protein 1A	CC2D1A	GPAS(0.033)T(0.967)PTYS(0.996)PAPT(0.004)QPAPR	S208	23.3369	23.0972	23.0167	21.2767	20.9442	20.456
Q6P1N0	Coiled-coil and C2 domain-containing protein 1A	CC2D1A	KQNS(0.997)PVAPT(0.003)AQPK	S455	25.1752	25.0174	25.4752	24.286	22.6093	22.3037
Q6P1Q9	Methyltransferase-like protein 2B	METTL2B	FLS(1)DPAR	S26	24.1492	23.8137	24.0579	21.3783	21.2517	21.7085
Q6P2E9	Enhancer of mRNA-decapping protein 4	EDC4	IVELPAPADFLS(0.914)LS(0.032)S(0.045)ET(0.009)KPK	S583	24.9594	24.7539	24.0946	21.5756	22.8511	22.0843
Q6P2H3	Centrosomal protein of 85 kDa	CEP85	AMQEKYPTEGISHVT(0.062)S(0.894)PS(0.039)S(0.005)DVIQK	S17	26.0419	26.0546	25.5156	22.0797	20.9288	24.5781
Q6P4F7	Rho GTPase-activating protein 11A	ARHGAP11A	QS(0.01)S(0.989)VT(0.001)NVGKVK	S620	23.9734	23.4738	22.6263	21.3514	21.65	20.9108
Q6PJG6	BRCA1-associated ATM activator 1	BRAT1	GS(1)PNTASAEATLPR	S742	22.8051	21.021	21.427	26.3623	26.3377	26.282
Q6PJI9	WD repeat-containing protein 59	WDR59	AVS(0.999)PT(0.001)EPTPR	S564	26.4328	26.9456	26.5659	24.921	24.897	24.4009
Q6PKG0	La-related protein 1	LARP1	FS(0.004)HLT(0.118)S(0.878)LPQQLPSQQLMSK	S584	25.8194	25.5949	25.7278	21.164	21.3363	21.4596
Q6PL18	ATPase family AAA domain-containing protein 2	ATAD2	AGDGS(0.233)S(0.766)VKEVETYHR	S61	20.7002	22.2228	22.1211	24.309	24.6222	23.6771
Q6PL18	ATPase family AAA domain-containing protein 2	ATAD2	QQNAS(0.954)ES(0.046)KLELR	S1233	21.9459	21.2007	21.35	23.873	22.9366	23.5026
Q6R327	Rapamycin-insensitive companion of mTOR	RICTOR	ALS(0.977)YAS(0.023)LDKEDLLSPINQNTLQR	S1385	21.4975	20.7059	21.3361	23.996	24.422	24.5881
Q6Y7W6	PERQ amino acid-rich with GYF domain-containing protein 2	GIGYF2	SES(1)ENWR	S201	26.9264	26.655	26.5166	23.3034	23.5152	23.0506
Q6ZN54	Differentially expressed in FDCP 8 homolog	DEF8	KQS(1)LFQEPGPDVEA	S501	24.7495	24.5473	24.461	22.0482	21.4172	22.6812
Q76FK4	Nucleolar protein 8	NOL8	EYDS(1)GDT(1)DEIIAMK	S378	24.0587	23.8502	24.2334	26.7356	26.0738	25.6829
Q7KZF4	Staphylococcal nuclease domain-containing protein 1	SND1	SLLS(1)AEEAAK	S645	24.4219	24.3686	24.3896	20.3824	21.9912	22.0341
Q7Z2Z1	Treslin	TICRR	S(0.017)LS(0.979)FS(0.149)KT(0.605)T(0.25)PR	S1115	21.358	22.1295	21.1148	24.5885	24.4133	23.8592
Q7Z3C6	Autophagy-related protein 9A	ATG9A	S(0.125)FS(0.875)PLQPGQAPTGR	S656	20.561	24.6014	21.1271	25.0427	25.129	24.8844
Q7Z3K3	Pogo transposable element with ZNF domain	POGZ	S(0.045)T(0.049)PS(0.059)T(0.065)S(0.154)T(0.154)T(0.154)PT(0.154)AT(0.154)QPT(0.006)S(0.006)LGQLAVQS(0.986)PGQS(0.012)NQT(0.001)TNPK	S274	23.8229	24.249	23.7284	22.2055	20.1031	22.1604
Q7Z422	SUZ domain-containing protein 1	SZRD1	ILGS(1)AS(1)PEEEQEKPILDRPTR	S105	23.8665	24.1819	23.9672	21.9588	21.2004	21.1338
Q7Z422	SUZ domain-containing protein 1	SZRD1	ILGS(1)AS(1)PEEEQEKPILDRPTR	S107	29.8458	29.4919	29.0678	27.2102	27.5121	27.3639
Q7Z4V5	Hepatoma-derived growth factor-related protein 2	HDGFRP2	KRS(1)EGFSMDR	S454	21.3792	23.3259	24.1452	25.5104	25.8645	25.4873
Q7Z5K2	Wings apart-like protein homolog	WAPAL	RPES(0.996)PS(0.897)EIS(0.108)PIKGSVR	S223	27.5686	23.635	27.2393	21.4165	20.706	21.6034
Q7Z6Z7	E3 ubiquitin-protein ligase HUWE1	HUWE1	AQCETLS(1)PDGLPEEQPQTTK	S3662	26.8642	27.0108	26.8792	23.9164	24.2637	21.9941
Q86TB9	Protein PAT1 homolog 1	PATL1	RS(0.766)T(0.258)S(0.976)PIIGS(1)PPVR	S184	22.6481	22.1115	22.6962	25.7373	25.2496	23.7126
Q86UE4	Protein LYRIC	MTDH	LSSQIS(1)AGEEK	S298	29.5596	29.493	29.5123	26.7549	24.6686	24.7086
Q86UU1	Pleckstrin homology-like domain family B member 1	PHLDB1	ELPPLS(0.79)PS(0.083)LS(0.127)R	S461	21.3187	21.7128	21.5447	23.8374	23.6518	23.4411
Q86UU1	Pleckstrin homology-like domain family B member 1	PHLDB1	TFS(1)DGLATR	S430	25.5741	25.0947	25.268	23.3508	23.4511	23.6905
Q86VQ1	Glucocorticoid-induced transcript 1 protein	GLCCI1	GPS(1)PSS(1)PTPPAAAAPAEQAPR	S105	23.1317	23.4705	21.6146	25.8895	25.5861	25.4288
Q86VQ1	Glucocorticoid-induced transcript 1 protein	GLCCI1	S(0.003)AS(0.996)WGS(0.001)ADQLK	S223	21.7064	24.3971	21.1777	26.4221	25.1175	25.1193
Q86VQ1	Glucocorticoid-induced transcript 1 protein	GLCCI1	S(1)IDTQT(0.856)PS(0.144)VQER	S345	21.897	21.4548	21.8169	25.5803	24.879	24.9799
Q86VQ1	Glucocorticoid-induced transcript 1 protein	GLCCI1	S(0.999)PGS(0.001)PVCR	S145	21.2521	21.5231	21.1482	23.7546	22.8771	22.9958
Q86VR2	Protein FAM134C	FAM134C	DVS(1)GSWER	S26	26.6344	26.0869	26.2945	23.328	22.9861	22.8509
Q86VR2	Protein FAM134C	FAM134C	GQTPLT(0.004)EGS(0.996)EDLDGHS(0.999)DPEES(0.001)FAR	S313	26.6783	26.5269	26.3521	25.2809	23.0656	22.1085
Q86VR2	Protein FAM134C	FAM134C	GQTPLT(0.004)EGS(0.996)EDLDGHS(0.999)DPEES(0.001)FAR	S320	26.6783	27.6518	27.162	25.2809	25.1292	21.4654
Q86WC4	Osteopetrosis-associated transmembrane protein 1	OSTM1	RLKS(0.921)S(0.09)T(0.079)S(0.91)FANIQENSN	S322	21.744	22.9825	22.655	27.2723	27.5234	26.9829
Q86WC4	Osteopetrosis-associated transmembrane protein 1	OSTM1	RLKS(0.921)S(0.09)T(0.079)S(0.91)FANIQENSN	S325	21.6551	24.6021	24.4756	27.4242	27.5234	26.9829
Q86X27	Ras-specific guanine nucleotide-releasing factor RalGPS2	RALGPS2	EDLVGPEVGAS(0.839)PQS(0.161)GR	S308	21.7183	21.1144	20.8663	24.0048	22.801	23.062
S4R3V8	Lipolysis-stimulated lipoprotein receptor	LSR	GPALT(0.016)PIRDEEWGGHS(0.986)PRS(0.998)PR	S419	21.6797	23.7525	22.7702	26.5462	25.7311	26.0329
Q86XP3	ATP-dependent RNA helicase DDX42	DDX42	AGSSAAGASGWTSAGSLNSVPT(0.002)NS(0.017)AQQGHNS(0.98)PDS(0.979)PVT(0.017)S(0.004)AAK	S751	27.7794	27.4503	28.2662	26.0995	26.1629	24.7624
Q8IVP5	FUN14 domain-containing protein 1	FUNDC1	NPPPQDY(0.002)ES(0.997)DDDS(0.001)YEVLDLTEYAR	S13	21.1313	25.5454	20.5949	26.1126	26.3604	25.9215
Q8IWS0	PHD finger protein 6	PHF6	T(0.011)AHNS(0.985)EADLEES(0.004)FNEHELEPS(0.633)S(0.367)PK	S138	21.7116	21.4608	21.2081	23.1905	24.3591	24.0986
Q8IX90	Spindle and kinetochore-associated protein 3	SKA3	TNS(0.002)S(0.998)SNDLEVEDR	S318	23.7094	21.8681	22.4802	25.6743	25.7298	25.9117
Q8IYB7	DIS3-like exonuclease 2	DIS3L2	GVSAVAGPHDIGAS(1)PGDKK	S31	25.4743	24.3357	23.955	23.4413	21.0554	21.7521
Q8IYB7	DIS3-like exonuclease 2	DIS3L2	VVKPES(0.008)NDKET(0.007)EAAY(0.012)ES(0.973)DIPEELCGHHLPQQSLK	S139	20.6608	21.6857	21.574	24.7028	24.4242	23.9872
Q8IZE3	Protein-associating with the carboxyl-terminal domain of ezrin	SCYL3	KDDVS(0.998)PVMQFS(0.002)S(0.001)K	S707	24.1724	23.6075	23.9621	22.3978	21.6354	22.0977
Q8IZL8	Proline-, glutamic acid- and leucine-rich protein 1	PELP1	GADTAPTLAPEALPS(1)QGEVER	S1033	25.4329	25.171	25.5209	24.3126	23.0729	21.5146
Q8N122	Regulatory-associated protein of mTOR	RPTOR	SVS(0.017)S(0.978)Y(0.005)GNIR	S722	26.2794	25.6832	25.9377	29.2598	29.3555	28.9755
Q8N122	Regulatory-associated protein of mTOR	RPTOR	VLDTSSLT(0.001)QS(0.999)APAS(0.999)PT(0.001)NK	S859	26.1879	22.7138	26.4765	29.3867	27.4274	27.2503
Q8N163	Cell cycle and apoptosis regulator protein 2	CCAR2	VQTLS(0.019)NQPLLKS(0.981)PAPPLLHVAALGQK	S124	23.3259	23.4325	23.3981	20.3073	20.9701	21.609
Q8N4C8	Misshapen-like kinase 1	MINK1	SNS(1)AWQIYLQR	S701	25.7289	25.0879	25.3755	21.6653	21.9945	23.5902
Q8N4C8	Misshapen-like kinase 1	MINK1	S(0.01)QS(0.99)LQDQPTR	S601	25.112	24.5994	24.2457	20.9441	22.7216	22.1223
Q8NC51	Plasminogen activator inhibitor 1 RNA-binding protein	SERBP1	S(0.005)KS(0.995)EEAHAEDSVMDHHFR	S330	26.8055	25.6771	27.1993	21.8937	23.1289	24.0544
Q8NCN4	E3 ubiquitin-protein ligase RNF169	RNF169	RKGS(1)VDQYLLR	S693	23.8276	23.1788	23.9878	21.3645	21.6616	21.4871
Q8ND56	Protein LSM14 homolog A	LSM14A	SLKTQLS(1)QGR	S178	27.8149	27.4618	27.9241	23.381	23.7222	22.5555
Q8ND56	Protein LSM14 homolog A	LSM14A	T(0.002)QLS(0.995)QGRS(0.066)S(0.937)PQLDPLRK	S183	23.6605	23.6323	23.977	28.0918	26.2087	25.711
Q8ND56	Protein LSM14 homolog A	LSM14A	S(0.459)S(0.541)PQLDPLRKS(0.936)PT(0.064)MEQAVQTASAHLPAPAAVGR	S192	22.9592	22.8288	23.3487	27.9133	25.9698	25.2705
Q8NEF9	Serum response factor-binding protein 1	SRFBP1	EYFDDS(0.796)T(0.204)EER	S264	22.004	21.4297	24.0303	26.0524	24.4958	24.6969
Q8NF50	Dedicator of cytokinesis protein 8	DOCK8	ALS(1)LEENGVGSNFK	S451	26.5928	26.467	26.5982	22.9067	21.7499	23.2294
Q8NI08	Nuclear receptor coactivator 7	NCOA7	VLS(0.999)S(0.001)T(0.005)S(0.995)EEDEPGVVK	S211	23.6977	23.4939	23.7428	21.8055	21.8949	20.5088
Q8TB72	Pumilio homolog 2	PUM2	RES(0.985)LS(0.014)T(0.001)SSDLYKR	S587	25.2478	24.6225	24.6962	21.9108	20.7287	23.6187
Q8TEK3	Histone-lysine N-methyltransferase, H3 lysine-79 specific	DOT1L	HLS(0.991)QDHT(0.009)VPGRPAASELHSR	S786	20.9435	21.6051	21.8472	23.8875	23.4451	24.2175
Q8TEQ6	Gem-associated protein 5	GEMIN5	TLS(0.999)VEPSQQLDTASTEETDPETSQPEPNRPSELDLR	S1311	25.9623	25.462	25.6938	21.9529	21.6828	23.2805
Q8TEV9	Smith-Magenis syndrome chromosomal region candidate gene 8 protein	SMCR8	S(0.414)DS(0.587)QAS(0.97)LT(0.029)VPLSPQVVR	S492	21.386	21.2119	21.3229	24.1251	23.0297	23.1836
Q8TF74	WAS/WASL-interacting protein family member 2	WIPF2	NGHRDS(1)ITTVR	S385	23.4909	24.2207	23.3465	21.8055	20.963	22.0347
Q92538	Golgi-specific brefeldin A-resistance guanine nucleotide exchange factor 1	GBF1	AASS(0.004)S(0.949)S(0.047)PGS(1)PVASSPSR	S1784	26.4748	25.4739	25.2194	22.9617	23.5128	22.6001
Q92538	Golgi-specific brefeldin A-resistance guanine nucleotide exchange factor 1	GBF1	ADAPDAGAQS(0.794)DS(0.197)ELPS(0.048)Y(0.007)HQNDVS(0.953)LDR	S1311	21.9033	21.1802	21.4274	25.135	24.3182	24.1418
Q92609	TBC1 domain family member 5	TBC1D5	NISS(0.029)S(0.861)PS(0.116)VES(0.993)LPGGR	S544	21.572	20.4517	22.3418	25.4007	25.041	24.8534
Q92609	TBC1 domain family member 5	TBC1D5	SES(1)MPVQLNK	S522	23.1244	22.4138	22.6525	25.7329	25.1032	24.5292
Q92616	Translational activator GCN1	GCN1L1	SIIQS(0.022)AQQDS(0.978)IKK	S786	24.4032	24.286	24.4335	22.6414	21.6613	21.024
Q92625	Ankyrin repeat and SAM domain-containing protein 1A	ANKS1A	SPS(1)FASEWDEIEK	S663	22.0207	23.3582	23.4161	25.7153	25.5079	25.1204
Q92625	Ankyrin repeat and SAM domain-containing protein 1A	ANKS1A	SES(1)LSNCSIGKK	S647	24.7477	24.0183	24.8587	27.4196	27.6595	27.5131
Q92625	Ankyrin repeat and SAM domain-containing protein 1A	ANKS1A	S(0.153)LS(0.17)KS(0.263)DS(0.414)DLLT(0.015)CS(0.958)PT(0.026)EDATMGSR	S634	25.5959	25.1382	25.3734	23.8417	23.75	21.0684
Q92667	A-kinase anchor protein 1, mitochondrial	AKAP1	SES(0.999)S(0.001)GILPNTTDMR	S107	21.2752	23.0268	22.4289	24.9345	24.9184	25.1556
Q92769	Histone deacetylase 2	HDAC2	IACDEEFS(1)DS(1)EDEGEGGRR	S422	24.3921	23.6923	24.3662	22.2486	22.2508	20.6589
Q92797	Symplekin	SYMPK	LSAQGQAISVVGSLSSMS(1)PLEEEAPQAK	S510	25.8406	26.4803	25.9469	24.1543	23.0441	23.5006
Q92845	Kinesin-associated protein 3	KIFAP3	LKS(0.999)LNANTDITSLAR	S60	23.4623	23.6011	23.7224	22.0235	21.5463	20.4091
V9GYM8	Rho guanine nucleotide exchange factor 2	ARHGEF2	QELGS(1)PEER	S977	26.2869	26.7975	26.545	21.5249	25.6682	21.376
Q92994	Transcription factor IIIB 90 kDa subunit	BRF1	GLSS(0.001)AGGGS(0.999)PHREDAQPEHSASAR	S553	25.0801	25.6235	25.2142	21.6094	21.7	20.6625
Q96A65	Exocyst complex component 4	EXOC4	T(0.013)LS(0.84)T(0.133)S(0.014)DDVEDRENEK	S32	24.2771	23.8876	24.3935	21.0034	20.7933	21.9767
Q96AD5	Patatin-like phospholipase domain-containing protein 2	PNPLA2	NNLS(1)LGDALAK	S428	22.889	20.9236	21.653	25.7095	24.4502	24.2871
Q96AD5	Patatin-like phospholipase domain-containing protein 2	PNPLA2	VQS(0.999)LPS(0.001)VPLSCAAYR	S404	21.0426	21.562	21.6497	24.0889	24.3113	24.8084
Q96AE4	Far upstream element-binding protein 1	FUBP1	IQIAPDS(1)GGLPER	S140	25.3339	24.9619	25.1759	21.8709	22.4951	21.7658
Q96BZ8	Leukocyte receptor cluster member 1	LENG1	HQNS(1)LPELEAAEAGAPGSGPVDLFR	S59	25.2048	25.3769	24.3741	23.0923	21.4433	22.3298
Q96C19	EF-hand domain-containing protein D2	EFHD2	ATDELAT(0.056)KLS(0.944)R	S11	21.0326	21.4251	20.8511	23.8113	23.8727	23.7571
Q96D71	RalBP1-associated Eps domain-containing protein 1	REPS1	RQS(0.919)S(0.628)S(0.216)Y(0.237)DDPWKITDEQR	S272	24.1925	24.2746	24.1264	21.5638	22.1712	21.0511
Q96GV9	UNC119-binding protein C5orf30	C5orf30	S(1)LDYLNLDK	S167	21.8941	21.9138	21.8605	23.7025	24.2375	23.5104
Q96GX5	Serine/threonine-protein kinase greatwall	MASTL	DLELALS(1)PIHNSSALPTTGR	S370	23.635	21.4747	23.6101	25.76	25.4375	25.8609
Q96H55	Unconventional myosin-XIX	MYO19	LIHVT(0.092)S(0.903)S(0.005)AFTGLG	S963	21.6597	22.7859	21.3929	27.0997	27.1143	27.1273
Q96J92	Serine/threonine-protein kinase WNK4	WNK4	LRVT(0.117)S(0.83)VS(0.054)DQNDR	S680	20.674	19.9088	21.0131	23.679	24.1145	24.0113
Q96JC9	ELL-associated factor 1	EAF1	T(0.462)S(0.538)PLKDNPS(1)PEPQLDDIKR	S165	21.6592	25.7409	21.6207	27.3611	25.8812	25.8468
Q96JM3	Chromosome alignment-maintaining phosphoprotein 1	CHAMP1	KT(0.012)S(0.988)PASLDFPESQK	S459	22.2877	21.7742	21.0141	26.7512	26.242	26.3765
Q96L91	E1A-binding protein p400	EP400	VAVNALAVGEPGT(0.006)AS(0.995)KPAS(0.998)PIGGPT(0.002)QEEK	S1728	26.3202	26.4705	25.8735	24.087	24.1856	23.5788
Q96L91	E1A-binding protein p400	EP400	VAVNALAVGEPGT(0.011)AS(0.989)KPAS(0.998)PIGGPT(0.002)QEEK	S1732	27.5926	27.5973	27.4255	24.087	24.1856	26.2038
Q96N67	Dedicator of cytokinesis protein 7	DOCK7	RNS(0.932)S(0.068)IVGR	S439	24.9	25.4116	24.2443	22.2578	22.5143	21.5074
Q96N67	Dedicator of cytokinesis protein 7	DOCK7	SLS(0.034)NS(0.966)NPDISGTPTSPDDEVR	S900	23.5007	24.9609	24.4247	26.4703	26.5494	25.9539
Q96N67	Dedicator of cytokinesis protein 7	DOCK7	SPSGSAFGS(1)QENLR	S1438	22.7088	21.7867	21.9241	25.3661	25.0558	24.0952
Q96NW4	Ankyrin repeat domain-containing protein 27	ANKRD27	DRS(1)VPNLTEGSLHEPGR	S962	21.8065	21.4263	23.8828	25.3981	25.2358	24.5359
Q96PK6	RNA-binding protein 14	RBM14	AQPS(0.004)AS(0.996)LGVGYR	S256	27.7082	26.9744	27.2053	23.8034	21.6734	21.4034
Q96PK6	RNA-binding protein 14	RBM14	AQPS(0.001)VS(0.999)LGAPYR	S280	26.1857	26.045	26.3496	23.5788	21.7921	23.0906
Q96PK6	RNA-binding protein 14	RBM14	SPLRRS(1)PPR	S220	25.0363	24.6412	24.7723	21.6261	23.1161	20.8232
Q96Q15	Serine/threonine-protein kinase SMG1	SMG1	NLAT(0.027)S(0.973)ADT(1)PPSTVPGTGK	S3570	25.0858	25.0292	24.8332	26.8667	26.7296	26.6651
Q96RS0	Trimethylguanosine synthase	TGS1	CQSVS(0.01)S(0.99)AGELETENYER	S578	22.8676	21.8072	21.1187	24.9648	23.651	23.781
Q96RS0	Trimethylguanosine synthase	TGS1	EYEEDDILAS(1)DDPSSIEQYENTR	S154	22.7464	23.4034	23.4043	25.4133	25.2925	24.9901
Q96T23	Remodeling and spacing factor 1	RSF1	FYETKEES(0.024)YS(0.932)PS(0.043)KDR	S473	27.0748	25.9111	25.7588	24.9469	21.805	21.4758
Q96T58	Msx2-interacting protein	SPEN	ESGVVAVS(0.999)PEKS(0.128)ES(0.873)PQKEDGLSSQLK	S2120	21.2884	21.6127	25.621	26.8866	25.6316	26.1007
Q96T58	Msx2-interacting protein	SPEN	ESGVVAVS(0.948)PEKS(0.143)ES(0.909)PQKEDGLSSQLK	S2126	20.9841	21.7994	25.621	26.8866	25.6316	26.1007
Q96TA1	Niban-like protein 1	FAM129B	QVVS(0.085)VVQDEEVGLPFEAS(0.917)PES(0.997)PPPAS(0.989)PDGVT(0.012)EIR	S646	27.3417	26.3613	26.7948	21.8375	20.6917	27.1563
Q99543	DnaJ homolog subfamily C member 2;DnaJ homolog subfamily C member 2, N-terminally processed	DNAJC2	NAS(1)AS(1)FQELEDKK	S49	26.7184	26.1553	26.3095	29.8298	28.3492	28.0678
Q99661	Kinesin-like protein KIF2C;Kinesin-like protein	KIF2C	S(0.055)RS(0.828)T(0.127)RMS(0.913)T(0.071)VS(0.006)ELR	S115	22.1451	21.8304	21.7862	24.75	24.5954	24.0238
Q99767	Amyloid beta A4 precursor protein-binding family A member 2	APBA2	S(0.004)AS(0.996)QDCIETTPGAQEGK	S480	21.9705	23.4812	21.9813	24.525	24.7918	24.4537
Q9BSJ8	Extended synaptotagmin-1	ESYT1	LTHVDS(1)PLEAPAGPLGQVK	S963	24.7789	24.9967	24.9106	22.7209	23.0593	21.9373
Q9BT25	HAUS augmin-like complex subunit 8	HAUS8	KS(0.025)S(0.975)LLQK	S70	24.3322	24.0267	23.2878	21.2299	22.1643	20.8778
Q9BUT9	Protein FAM195A	FAM195A	RAPS(0.981)T(0.239)S(0.15)PS(0.606)FEGT(0.023)QET(0.001)YTVAHEENVR	S78	25.6821	25.0277	25.5858	21.7763	22.5413	23.2964
Q9BXL5	Hemogen	HEMGN	ILPCPTSEDTADLAGCS(1)LQAYPKPDVPK	S257	21.0877	21.3808	20.7153	27.4679	27.0526	26.6317
Q9BXR0	Queuine tRNA-ribosyltransferase	QTRT1	AGAATQAS(0.99)LES(0.01)APR	S9	24.4219	24.2072	24.4416	21.3075	20.8042	21.4025
Q9BXS6	Nucleolar and spindle-associated protein 1	NUSAP1	LSVAS(0.004)T(0.996)PIS(1)QR	S247	25.0811	24.8063	24.7804	23.416	21.9367	22.5895
Q9C073	Protein FAM117A	FAM117A	AAS(1)VPCSVAPEK	S67	24.2375	24.2572	24.1424	26.2438	26.0445	26.3096
Q9C0C2	182 kDa tankyrase-1-binding protein	TNKS1BP1	RFS(1)EGVLQS(0.957)PS(0.043)QDQEK	S429	25.9712	25.7003	25.7474	24.0282	24.2926	22.9813
Q9C0C2	182 kDa tankyrase-1-binding protein	TNKS1BP1	S(1)QEADVQDWEFR	S836	24.3261	23.8505	23.9983	22.5752	22.2897	20.5674
Q9C0C9	E2/E3 hybrid ubiquitin-protein ligase UBE2O	UBE2O	IMS(1)CSPDTQCSR	S399	24.1175	24.0804	24.8222	22.5626	22.7808	21.817
Q9C0D5	Protein TANC1	TANC1	GVSMSLPS(0.169)S(0.831)PLLPR	S67	21.7499	21.1815	20.9984	24.5799	23.6188	23.4535
Q9C0E8	Protein lunapark	LNP	NLS(0.969)PT(0.181)PAS(0.85)PNQGPPPQVPVS(0.899)PGPPKDS(0.052)S(0.049)APGGPPER	S182	24.5029	23.5159	23.6448	21.6067	21.2817	22.4012
Q9H0H5	Rac GTPase-activating protein 1	RACGAP1	SIGSAVDQGNES(1)IVAK	S214	23.0145	24.2528	21.2941	25.2838	25.183	25.1253
Q9H2M9	Rab3 GTPase-activating protein non-catalytic subunit	RAB3GAP2	ADFS(1)PFGNSQGPSR	S450	25.8416	26.04	25.8044	20.7897	21.3836	21.5165
Q9H307	Pinin	PNN	GFS(1)DSGGGPPAK	S66	29.389	29.1526	29.6425	26.3225	26.4065	25.8204
Q9H3C7	Gametogenetin-binding protein 2	GGNBP2	LEQLCEEFS(1)EEER	S360	21.9553	21.8938	21.2657	25.2448	25.0423	24.6293
Q9H3M7	Thioredoxin-interacting protein	TXNIP	LES(0.034)PT(0.171)T(0.795)PLLDDMDGS(0.033)QDS(0.966)PIFMY(0.001)APEFK	S361	20.8455	22.0741	20.7103	23.7587	24.433	24.5456
Q9H4L5	Oxysterol-binding protein-related protein 3	OSBPL3	QDS(1)WEVVEGLR	S34	23.6741	23.5053	23.7489	21.7873	21.8359	20.7741
Q9H582	Zinc finger protein 644	ZNF644	NSAIS(0.999)PQKIHNQT(0.001)AR	S1189	21.914	23.8611	20.0725	24.0967	24.8455	25.5376
Q9H6F5	Coiled-coil domain-containing protein 86	CCDC86	ALVEFES(0.004)NPEET(0.286)REPGS(0.846)PPS(0.865)VQR	S50	26.4166	26.3598	24.542	21.9263	23.7734	24.3028
Q9H6T3	RNA polymerase II-associated protein 3	RPAP3	ILDELDKDDSTHESLS(0.009)QES(0.919)ES(0.072)EEDGIHVDSQK	S119	24.5234	25.0285	26.0875	21.8841	20.7645	20.8604
Q9H8W4	Pleckstrin homology domain-containing family F member 2	PLEKHF2	RIS(1)IVENCFGAAGQPLTIPGR	S16	23.7609	23.4499	23.4035	22.1752	20.0125	20.7559
Q9H8W4	Pleckstrin homology domain-containing family F member 2	PLEKHF2	SDS(0.999)YSQSLK	S226	24.7694	24.3148	24.1668	23.2342	21.2122	21.6699
Q9HAW0	Transcription factor IIIB 50 kDa subunit	BRF2	ICPVPPVSTVTGDENIS(0.968)DS(0.032)EIEQYLR	S385	21.1935	21.9275	23.5342	25.19	24.7495	25.0377
Q9HAW4	Claspin	CLSPN	ASLVSS(0.032)AS(0.859)KS(0.083)S(0.026)GK	S823	22.94	20.5169	21.5576	25.8486	25.2733	24.6297
Q9HAW4	Claspin	CLSPN	FT(0.019)S(0.98)QDAS(0.786)T(0.212)PAS(0.002)S(0.001)ELNKQEK	S954	20.9257	20.2007	21.4811	24.2948	23.8662	22.912
Q9HAW4	Claspin	CLSPN	LGADEDS(1)FVILEPETNRELEALK	S516	20.5792	21.6534	23.5211	26.155	25.1714	25.1809
Q9HAW4	Claspin	CLSPN	S(0.68)LS(0.278)S(0.048)DS(0.997)T(0.997)LLLFK	S723	21.9192	19.5892	21.2808	26.6938	26.6181	26.3862
Q9HAW4	Claspin	CLSPN	VLQDS(0.971)DS(0.977)ET(0.05)EDT(0.003)NASPEK	S65	21.3847	22.0114	21.7103	24.5396	23.4541	23.8437
Q9HAW4	Claspin	CLSPN	VLQDS(0.971)DS(0.977)ET(0.05)EDT(0.003)NASPEK	S67	21.3584	21.5292	20.7008	24.5396	23.4541	23.8437
Q9HAZ1	Dual specificity protein kinase CLK4	CLK4	S(1)IEDDEEGHLICQSGDVLR	S138	21.5114	23.6327	21.1871	24.6622	24.3246	24.7751
Q9HAZ1	Dual specificity protein kinase CLK4	CLK4	S(1)RS(1)IEDDEEGHLICQSGDVLR	S136	21.9015	22.6655	21.4405	24.2333	23.6287	24.0759
Q9HC52	Chromobox protein homolog 8	CBX8	RQDS(1)DLVQCGVTSPSSAEATGK	S256	24.3637	25.4931	24.8225	22.3962	22.684	21.6153
Q9HCD5	Nuclear receptor coactivator 5	NCOA5	S(0.196)S(0.24)T(0.564)DS(0.999)LPGPISR	S381	23.1282	22.9426	21.4545	26.2256	25.2246	25.4457
Q9HCD6	Protein TANC2	TANC2	SCDELS(1)PVS(0.969)PT(0.031)QGGYPSEPTR	S1824	23.6209	23.819	24.5904	21.122	22.0458	22.1721
Q9HCD6	Protein TANC2	TANC2	SCDELS(1)PVS(0.969)PT(0.031)QGGYPSEPTR	S1827	23.6209	23.819	24.5904	22.0618	20.4429	21.0719
Q9HCG8	Pre-mRNA-splicing factor CWC22 homolog	CWC22	GRS(1)YDSSMESR	S61	22.5066	22.0129	23.6603	24.6258	25.2247	24.9602
Q9NPD8	Ubiquitin-conjugating enzyme E2 T	UBE2T	KAS(1)QLVGIEKK	S184	24.3594	23.79	24.3912	21.4468	22.4581	21.5716
Q9NQS7	Inner centromere protein	INCENP	VPSSLAYS(1)LK	S914	23.4022	22.8902	22.8999	21.5418	21.2056	20.7044
Q9NQT5	Exosome complex component RRP40	EXOSC3	AEPASVAAES(0.903)LAGS(0.097)R	S11	23.4565	23.1886	23.3712	21.8026	21.3209	21.5297
Q9NQW6	Actin-binding protein anillin	ANLN	QPLSEASNQQPLS(1)GGEEK	S54	23.4133	21.1391	21.3028	24.873	23.8134	24.5668
Q9NR09	Baculoviral IAP repeat-containing protein 6	BIRC6	S(1)LDGLSR	S590	23.8676	23.6332	23.7464	20.9895	21.9212	21.1818
Q9NR30	Nucleolar RNA helicase 2	DDX21	LKNGFPHPEPDCNPSEAASEES(0.01)NS(0.99)EIEQEIPVEQK	S173	28.9249	28.8706	28.7492	24.893	28.7641	21.9056
Q9NR30	Nucleolar RNA helicase 2	DDX21	LRSDAGLES(0.999)DT(0.001)AMK	S13	25.4832	25.0799	25.9499	28.577	27.5725	27.213
Q9NRA8	Eukaryotic translation initiation factor 4E transporter	EIF4ENIF1	WFS(0.008)NPS(0.992)R	S345	21.2008	21.4951	21.849	24.4043	23.6828	23.0286
Q9NS69	Mitochondrial import receptor subunit TOM22 homolog	TOMM22	AAAVAAAGAGEPQS(1)PDELLPK	S15	29.5206	29.5796	29.2349	26.267	24.6605	24.7886
Q9NSI8	SAM domain-containing protein SAMSN-1	SAMSN1	ALS(0.001)EEKDEEDGENAHPY(0.072)RNS(0.926)DPVIGT(0.001)HT(0.001)EK	S107	21.4085	21.025	21.6679	24.9318	24.9972	24.0192
Q9NSK0	Kinesin light chain 4	KLC4	RS(0.018)S(0.982)ELLVR	S566	25.9308	25.8046	25.759	23.3975	21.9935	23.2547
Q9NTI5	Sister chromatid cohesion protein PDS5 homolog B	PDS5B	LKEDILENEDEQNS(1)PPKK	S1283	25.9076	25.1362	26.3096	22.0328	25.3722	21.6214
Q9NTJ3	Structural maintenance of chromosomes protein 4;Structural maintenance of chromosomes protein	SMC4	RREEGPPPPS(1)PDGAS(1)S(1)DAEPEPPSGR	S27	26.2723	24.9598	24.9885	27.3281	27.6373	27.2762
Q9NU19	TBC1 domain family member 22B	TBC1D22B	SQS(0.998)T(0.001)TSDVPANYK	S116	25.1255	25.5643	25.3356	22.9098	23.3076	21.2465
Q9NWH9	SAFB-like transcription modulator	SLTM	IS(0.073)S(0.938)KS(0.989)PGHMVILDQTK	S551	22.5944	22.6153	22.0082	25.1262	24.5063	24.8182
Q9NYL2	Mitogen-activated protein kinase kinase kinase MLT	ZAK	NFS(0.999)S(0.001)LHLNSR	S648	24.1127	21.7445	21.7977	25.3933	25.825	25.3439
Q9NYL2	Mitogen-activated protein kinase kinase kinase MLT	ZAK	QIASNT(0.077)S(0.923)LQR	S587	25.996	25.2063	25.5496	21.6426	22.211	21.5882
Q9NYL2	Mitogen-activated protein kinase kinase kinase MLT	ZAK	SDS(0.102)S(0.898)ADCQWLDTLR	S568	25.1355	24.719	25.6707	22.7445	21.6194	21.5835
Q9NYL2	Mitogen-activated protein kinase kinase kinase MLT	ZAK	VSQSALNPHQS(1)PDFKRS(1)PR	S733	23.3754	20.9133	21.2932	23.8626	24.8923	24.3376
Q9NYZ3	G2 and S phase-expressed protein 1	GTSE1	AVGS(1)PLCVPAR	S536	25.38	25.2607	25.2088	24.4504	21.2371	22.2102
Q9NZL4	Hsp70-binding protein 1	HSPBP1	LLQTCFS(0.028)S(0.971)PADDS(0.001)MDR	S354	26.5144	26.6741	26.676	25.186	22.1532	22.2559
Q9NZN5	Rho guanine nucleotide exchange factor 12	ARHGEF12	T(0.001)AS(0.999)QGPQTDSVIQNSENIK	S1288	21.9317	22.2517	21.5701	24.5495	24.8362	24.1722
Q9P0L0	Vesicle-associated membrane protein-associated protein A	VAPA	QDGPMPKPHS(0.05)VS(0.937)LNDT(0.01)ET(0.003)R	S166	25.474	25.08	24.2653	21.779	23.337	23.018
Q9P206	Uncharacterized protein KIAA1522	KIAA1522	FSS(1)VSSPQPR	S339	25.583	25.2834	25.0495	22.8027	22.5878	22.2227
Q9P270	SLAIN motif-containing protein 2	SLAIN2	LQQPRLS(0.999)LQGHPT(0.001)DLQTSNVKNEEK	S391	24.3687	23.7306	25.3912	19.7555	23.2975	20.8484
Q9UBB6	Neurochondrin	NCDN	S(1)CCDLAAAGQLGK	S2	21.2715	22.0317	21.7149	25.1766	25.3355	24.9648
Q9UBU7	Protein DBF4 homolog A	DBF4	IKY(0.013)S(0.981)VGS(0.62)LS(0.374)PVS(0.01)AS(0.002)VLK	S354	21.1383	21.0587	20.888	23.0148	23.1818	22.9043
Q9UGR2	Zinc finger CCCH domain-containing protein 7B	ZC3H7B	LDALDS(0.967)FGS(0.875)T(0.158)R	S380	23.3681	23.7255	24.032	22.2984	21.5704	21.5953
Q9UHB7	AF4/FMR2 family member 4	AFF4	TIS(1)QSSSLK	S836	24.8343	24.5981	24.4907	26.3986	26.9284	27.0416
Q9UHI6	Probable ATP-dependent RNA helicase DDX20	DDX20	LNS(0.998)S(0.002)DPSLIGLK	S268	25.4143	25.1586	25.1621	21.8793	22.2175	20.84
Q9UHR4	Brain-specific angiogenesis inhibitor 1-associated protein 2-like protein 1	BAIAP2L1	TPASTPVS(0.001)GT(0.999)PQAS(1)PMIER	S261	24.0013	23.1125	24.0022	27.8728	26.9829	26.8327
Q9UI08	Ena/VASP-like protein	EVL	S(0.896)NS(0.104)VEKPVSSILSR	S329	20.9352	22.0905	21.6981	23.9378	23.7219	23.4548
Q9UIG0	Tyrosine-protein kinase BAZ1B	BAZ1B	DHT(0.009)VS(0.991)GDEDYCPR	S947	21.1488	21.4735	22.1361	25.537	24.9558	25.1435
Q9UIG0	Tyrosine-protein kinase BAZ1B	BAZ1B	RQS(1)LELQKCEEILHK	S1342	20.8175	21.2426	21.2305	24.8426	24.0114	23.7402
Q9UJA3	DNA helicase MCM8	MCM8	MNS(1)QDSNTSVLEVVSEKPLSER	S630	24.1293	23.6858	23.9	22.6634	20.8676	21.558
Q9UKA4	A-kinase anchor protein 11	AKAP11	QGS(1)LASSKPASNPK	S1611	24.9686	25.3094	25.6138	22.841	21.6556	20.3549
Q9UKA4	A-kinase anchor protein 11	AKAP11	S(0.017)LS(0.983)EEVESSESGELPEVDVK	S1171	25.2386	25.316	25.661	20.9309	21.5777	21.3187
Q9UKE5	TRAF2 and NCK-interacting protein kinase	TNIK	QNS(1)DPTSENPPLPTR	S640	25.3089	25.1481	25.36	21.1082	21.3189	21.853
Q9ULW0	Targeting protein for Xklp2	TPX2	S(1)LRLS(1)AQKDLEQK	S121	21.4267	21.999	21.7118	25.4468	25.1691	24.43
Q9ULW0	Targeting protein for Xklp2	TPX2	S(1)LRLS(1)AQKDLEQK	S125	21.6513	21.2301	22.2538	25.4468	25.1691	24.43
Q9UMN6	Histone-lysine N-methyltransferase 2B	KMT2B	TLLPWDS(1)DES(1)PEAS(1)PGPPGPR	S1039	23.2282	21.4291	20.4932	25.1106	24.8283	24.5211
Q9UMX0	Ubiquilin-1	UBQLN1	AESGES(0.014)GGPPGS(0.989)QDS(0.996)AAGAEGAGAPAAAAS(0.001)AEPK	S16	23.072	25.1215	23.1104	21.9392	20.7172	21.6581
Q9UNE7	E3 ubiquitin-protein ligase CHIP	STUB1	WNS(1)IEER	S149	24.1159	23.8385	24.1761	22.309	22.4687	21.6221
Q9UNZ2	NSFL1 cofactor p47	NSFL1C	LADGGRLVQKFNHS(1)HR	S315	23.6613	23.1819	23.8909	21.4028	21.5913	21.6077
Q9UPN4	Centrosomal protein of 131 kDa	CEP131	SVS(1)VVTGSEQK	S47	27.2991	27.0453	27.0242	24.0034	24.4882	21.694
Q9UPU5	Ubiquitin carboxyl-terminal hydrolase 24	USP24	QMS(1)LCGTPEK	S1285	25.7754	25.123	25.8512	23.6406	23.4639	23.173
Q9UPU5	Ubiquitin carboxyl-terminal hydrolase 24	USP24	QT(0.16)S(0.837)RQMS(0.003)LCGTPEK	S1281	24.7656	24.7319	24.2192	20.9571	22.1779	21.7249
Q9UQ35	Serine/arginine repetitive matrix protein 2	SRRM2	MSCFS(0.001)RPS(0.999)MS(0.997)PT(0.003)PLDR	S2121	24.8428	25.1475	24.7451	27.0878	27.9681	27.2087
Q9UQ35	Serine/arginine repetitive matrix protein 2	SRRM2	SCFES(1)S(1)PDPELK	S875	25.6074	26.2486	26.0974	27.9518	27.905	27.7662
Q9UQ35	Serine/arginine repetitive matrix protein 2	SRRM2	S(0.919)S(0.082)RS(0.327)S(0.672)PELT(0.001)R	S1690	21.2618	28.5152	21.6272	27.9609	28.1214	27.9383
Q9UQ35	Serine/arginine repetitive matrix protein 2	SRRM2	S(1)AHATAPVNIAGSR	S2343	24.9322	24.625	24.5652	21.3807	21.6984	22.3452
Q9UQ35	Serine/arginine repetitive matrix protein 2	SRRM2	S(0.916)GS(0.321)S(0.762)QELDVKPS(0.007)AS(0.993)PQER	S1539	23.8285	21.4027	20.5671	25.619	23.7046	24.3797
Q9UQ35	Serine/arginine repetitive matrix protein 2	SRRM2	S(0.002)RT(0.009)S(0.987)PVS(0.002)R	S1893	27.0759	24.6149	24.4375	22.7276	22.746	21.9363
Q9UQ35	Serine/arginine repetitive matrix protein 2	SRRM2	S(0.736)S(0.275)S(0.988)PVTELAS(0.007)RS(0.993)PIR	S1112	24.6735	21.5012	25.0262	26.9886	28.3223	25.1174
Q9UQ35	Serine/arginine repetitive matrix protein 2	SRRM2	TPAAAAAMNLAS(1)PR	S2272	30.3762	30.149	30.0435	28.0602	28.3178	28.1311
Q9Y2G3	Probable phospholipid-transporting ATPase IF	ATP11B	SWS(1)ASDPFYTNDR	S1154	23.5721	24.621	24.0543	26.2666	26.3982	26.3522
Q9Y2V2	Calcium-regulated heat stable protein 1	CARHSP1	TFS(1)ATVR	S52	30.6258	30.5328	30.6221	32.6254	32.3399	32.4252
Q9Y2W1	Thyroid hormone receptor-associated protein 3	THRAP3	DLVHS(1)NKKEQEFR	S600	24.5894	24.3633	24.1024	22.3331	22.2297	21.102
Q9Y385	Ubiquitin-conjugating enzyme E2 J1	UBE2J1	QIS(1)FKAEVNSSGK	S184	24.6396	23.9894	24.0761	21.1676	22.5905	21.7684
Q9Y388	RNA-binding motif protein, X-linked 2	RBMX2	ES(0.011)S(0.986)NPS(0.003)DRWRH	S314	21.0586	21.9556	20.9677	23.0193	24.2677	23.6981
Q9Y3F4	Serine-threonine kinase receptor-associated protein	STRAP	CVLPEEDS(1)GELAKPK	S312	24.2826	23.9986	24.4887	21.6664	22.8896	21.191
Q9Y3T9	Nucleolar complex protein 2 homolog	NOC2L	GILRPLS(0.937)T(0.063)R	S691	25.3416	24.9163	25.0145	21.4491	21.6076	21.3341
Q9Y446	Plakophilin-3	PKP3	LSS(1)GFDDIDLPSAVK	S314	30.1873	30.1142	30.5572	27.8567	27.8703	27.7592
Q9Y478	5'-AMP-activated protein kinase subunit beta-1	PRKAB1	S(1)HNNFVAILDLPEGEHQYK	S108	21.1143	22.3257	21.851	26.6982	26.161	25.7924
Q9Y4H2	Insulin receptor substrate 2	IRS2	T(0.041)AS(0.959)EGDGGAAAGAAAAGAR	S365	21.0402	21.8287	21.2319	26.1683	24.0523	24.2098
Q9Y570	Protein phosphatase methylesterase 1	PPME1	QCEGIT(0.078)S(0.922)PEGSK	S243	28.9438	29.29	28.9961	24.3246	22.3024	24.5226
Q9Y5K6	CD2-associated protein	CD2AP	SVDFDS(0.981)LT(0.019)VR	S463	25.0971	24.6753	24.9132	21.9358	22.5786	22.0517
Q9Y6G9	Cytoplasmic dynein 1 light intermediate chain 1	DYNC1LI1	S(1)GQKPVLDVHAELDR	S487	23.8074	23.258	23.5083	21.5618	21.7945	21.6338
A0A087WUD6	G antigen 4;G antigen 12I;G antigen 12G;G antigen 12F;G antigen 7;G antigen 1	GAGE2E;GAGE4;GAGE12I;GAGE12G;GAGE12F;GAGE7;GAGE1	RYVQPPEMIGPMRPEQFSDEVEPAT(1)PEEGEPATQR	T40	26.5007	26.8872	26.026	23.2382	23.7966	21.3923
A0A087WUZ3	Spectrin beta chain, non-erythrocytic 1	SPTBN1	AQT(1)LPTSVVT(0.003)IT(0.027)S(0.306)ES(0.365)S(0.299)PGKR	T2330	22.7996	21.6543	21.9227	25.4396	25.4944	25.4135
A0A087WUZ3	Spectrin beta chain, non-erythrocytic 1	SPTBN1	TALPAQS(0.021)AAT(0.979)LPAR	T2189	23.0649	22.0678	22.1467	26.3184	25.9817	25.6062
H7C4X9	Protein kinase C-binding protein 1	ZMYND8	QDVVGKT(0.983)PPS(0.015)T(0.01)T(0.01)VGS(0.049)HS(0.895)PPET(0.031)PVLT(0.008)R	T673	21.5487	21.7468	23.9273	25.4723	24.8358	24.6603
A0A087WWU8		TPM3;DKFZp686J1372	MLDQT(1)LLDLNEM	T220	23.8539	24.5282	25.1563	21.9065	21.1992	20.7225
A0A087WX59	Proteasomal ubiquitin receptor ADRM1	ADRM1	S(0.011)QS(0.989)AAVT(0.992)PS(0.006)S(0.001)TTSSTR	T178	27.6147	27.3045	26.8459	24.8467	21.6821	20.7988
H7BXI1	Extended synaptotagmin-2	ESYT2	EPT(0.792)PS(0.181)IAS(0.193)DIS(0.832)LPIAT(0.002)QELR	T716	22.4517	21.2846	20.8884	25.9166	22.7746	24.0372
C9JP00	Muscleblind-like protein 1	MBNL1	AVSVT(1)PIRDTK	T6	26.3041	25.3266	25.6629	21.8642	21.1012	21.6339
A0A0A0MRM9	Nucleolar and coiled-body phosphoprotein 1	NOLC1	IT(1)PVTVK	T187	21.0848	21.6675	20.8527	25.2051	23.4803	23.9002
A0A0A0MSG0	WAS/WASL-interacting protein family member 3	WIPF3	GAS(0.208)T(0.792)PPTLGDLFAGGFPVLRPAGQR	T94	24.2885	23.5698	23.6942	21.275	21.9472	21.9376
A0A0J9YYL3	Poly(U)-binding-splicing factor PUF60	PUF60	AVTPPMPLLT(1)PAT(1)PGGLPPAAAVAAAAATAK	T257	25.3941	25.3817	25.2551	22.372	20.8371	21.4661
A0A0J9YYL3	Poly(U)-binding-splicing factor PUF60	PUF60	AVT(0.001)PPMPLLT(0.999)PAT(1)PGGLPPAAAVAAAAATAK	T260	27.7928	27.5734	27.7062	25.9904	26.0382	25.6448
A0A1B0GTW1	Tight junction protein ZO-2	TJP2	LIS(0.001)DFEDT(0.999)DGEGGAY(0.103)T(0.897)DNELDEPAEEPLVSSITR	T992	25.2532	25.8971	25.9251	22.3653	25.2554	20.0775
A0A1W2PPZ3	Mitogen-activated protein kinase 8;Mitogen-activated protein kinase 10	MAPK8;MAPK10	TAGTSFMMT(0.999)PY(0.995)VVT(0.005)R	T43	26.3868	26.5161	25.9851	22.52	20.1128	21.3659
P49792	RANBP2-like and GRIP domain-containing protein 2;RANBP2-like and GRIP domain-containing protein 1;RanBP2-like and GRIP domain-containing protein 3;RANBP2-like and GRIP domain-containing protein 5/6;RANBP2-like and GRIP domain-containing protein 8;E3 SUMO-protein ligase RanBP2	RGPD1;RGPD2;RGPD3;RGPD8;RGPD5;RANBP2	LLLDIPLQT(1)PHKLVDTGR	T2153	26.562	26.2081	26.1762	23.7917	24.4132	24.1907
B4DP61	Survival motor neuron protein	SMN2;SMN1	RGT(1)GQS(1)DDS(1)DIWDDTALIK	T25	23.4457	23.8189	20.9567	26.7336	26.4841	26.0428
A0MZ66	Shootin-1	KIAA1598	T(0.001)LEAEFNS(0.779)PS(0.222)PPT(0.998)PEPGEGPR	T537	24.5921	24.5616	24.1908	21.1604	21.31	21.1097
P07355	Annexin A2;Putative annexin A2-like protein;Annexin	ANXA2;ANXA2P2	LSLEGDHS(0.01)T(0.964)PPS(0.012)AY(0.01)GS(0.003)VK	T19	24.7818	24.5072	24.6604	22.9029	21.0982	22.5467
A8MT19	Putative rhophilin-2-like protein RHPN2P1;Rhophilin-2	RHPN2P1;RHPN2	SAT(1)YSVGMQK	T503	22.78	22.3771	20.4178	24.79	24.9504	24.2034
Q8NBY1	Serine/threonine-protein kinase 26	STK26	ENNTHPEWS(0.001)FT(0.06)T(0.939)VR	T328	24.0553	24.0534	23.7596	21.7647	22.7887	20.7286
B8ZZU6	Cyclic AMP-dependent transcription factor ATF-2	ATF2	KMPLDLS(1)PLAT(1)PIIR	T98	24.4217	24.468	24.0743	21.0745	21.8569	21.7669
D7R525	Mitogen-activated protein kinase 9	MAPK9	TACTNFMMT(1)PY(0.998)VVT(0.002)R	T183	24.5581	24.9644	24.4385	22.3599	21.5408	21.9395
E7END7	Ras-related protein Rab-1A	RAB1A	IQS(0.156)T(0.844)PVK	T163	25.2199	24.1628	25.0993	21.8471	21.0014	23.0459
E9PGG1	Cytoplasmic dynein 1 intermediate chain 2	DYNC1I2	SVS(0.002)T(0.998)PSEAGSQDSGDGAVGSR	T89	28.3109	27.5159	27.9914	25.9411	26.1496	24.8068
S4R3H4	Apoptotic chromatin condensation inducer in the nucleus	ACIN1	DSSTSYTETKDPS(0.001)S(0.001)GQEVAT(0.998)PPVPQLQVCEPK	T624	24.5546	24.4908	24.5401	20.6855	23.3919	21.7807
E7ERS3	Zinc finger CCCH domain-containing protein 18	ZC3H18	SSQQPS(0.226)T(0.774)PQQAPPGQPQQGTFVAHK	T820	24.8053	24.8683	25.1269	22.0444	24.025	20.1002
E9PK52	Band 4.1-like protein 2	EPB41L2	SSHET(1)LNIVEEK	T616	21.2123	22.1391	20.9449	23.9001	24.1594	24.1099
G3V529	ATP-dependent RNA helicase DDX24	DDX24	S(0.022)PGKAEAES(0.011)DALPDDT(0.967)VIESEALPSDIAAEAR	T259	22.3269	22.4597	21.8142	26.0374	24.9277	24.8516
G3XAL9	Solute carrier family 12 member 2	SLC12A2	T(1)FGHNT(1)MDAVPR	T212	21.5181	22.3385	22.1403	25.2404	24.2478	23.8437
G3XAL9	Solute carrier family 12 member 2	SLC12A2	T(1)FGHNT(1)MDAVPR	T217	21.59	22.3035	21.3049	25.5739	24.8595	24.8193
H0Y579	UV excision repair protein RAD23 homolog B	RAD23B	QEKPAEKPAET(1)PVAT(0.289)S(0.587)PT(0.118)AT(0.007)DSTSGDSSR	T25	25.1168	25.5665	25.6239	23.8868	21.1822	22.9808
H0YEV2	Src substrate cortactin	CTTN	T(0.161)QT(0.839)PPVS(0.001)PAPQPT(0.95)EERLPS(0.025)S(0.023)PVYEDAASFK	T45	27.3852	28.8788	26.9037	22.5224	22.0965	26.5471
J3QLE5	Small nuclear ribonucleoprotein-associated protein N;Small nuclear ribonucleoprotein-associated proteins B and B'	SNRPN;SNRPB	GVGGPS(0.007)QQVMT(0.993)PQGR	T143	23.7677	22.9924	23.3586	21.2809	21.4621	21.1435
M0R0P8	Unconventional myosin-IXb	MYO9B	ATGAALT(1)PTEER	T1346	27.2394	26.9809	27.183	24.6593	24.028	21.1384
M0R1B0	ER membrane protein complex subunit 8	EMC8	NDWT(1)NPEINK	T88	21.0939	20.8992	21.5541	27.4033	27.6251	27.3724
O00267	Transcription elongation factor SPT5	SUPT5H	VVSISSEHLEPIT(0.958)PT(0.041)KNNK	T1034	23.985	23.55	23.8899	21.4196	20.9368	21.2443
O15446	DNA-directed RNA polymerase I subunit RPA34	CD3EAP	QEQINTEPLEDT(0.808)VLS(0.144)PT(0.048)KKR	T282	24.8701	24.6625	24.4772	22.8615	21.2111	22.123
O43290	U4/U6.U5 tri-snRNP-associated protein 1	SART1	ADDLLPLGDQT(0.999)QDGDFGS(0.001)R	T430	22.9129	21.7355	22.072	25.3103	24.7677	24.7934
O43379	WD repeat-containing protein 62	WDR62	RPS(0.463)S(0.497)VGELAS(0.041)LGQELQAITTAT(0.144)T(0.817)PS(0.038)LDS(0.001)EGQEPALR	T1268	26.0688	26.3523	26.2888	21.4279	24.8236	21.9167
O60271	C-Jun-amino-terminal kinase-interacting protein 4	SPAG9	AT(0.109)T(0.891)PASTANSDVATIPTDTPLKEENEGFVK	T276	24.4196	26.2794	24.8887	22.4245	20.3661	22.1217
O60271	C-Jun-amino-terminal kinase-interacting protein 4	SPAG9	ATTPASTANSDVAT(0.002)IPT(0.14)DT(0.858)PLKEENEGFVK	T292	26.0323	26.1239	26.2975	21.9958	21.0842	20.4644
O60271	C-Jun-amino-terminal kinase-interacting protein 4	SPAG9	ERPIS(1)LGIFPLPAGDGLLT(1)PDAQK	T217	26.867	26.577	27.1116	25.1123	24.6369	24.3548
O60271	C-Jun-amino-terminal kinase-interacting protein 4	SPAG9	GGET(1)PGS(1)EQWKFQELSQPR	T226	26.2686	26.3469	26.3688	21.9504	23.238	23.3019
O75419	Cell division control protein 45 homolog	CDC45	NEDEENT(0.999)LS(0.001)VDCTR	T262	22.222	21.4153	21.4545	24.9952	24.4259	24.3811
O75533	Splicing factor 3B subunit 1	SF3B1	LT(0.072)AT(0.928)PT(0.987)PLGGMT(0.009)GFHMQT(0.003)EDR	T434	21.7518	22.144	21.8704	23.8715	24.0237	23.5
O75533	Splicing factor 3B subunit 1	SF3B1	LT(0.072)AT(0.928)PT(0.987)PLGGMT(0.009)GFHMQT(0.003)EDR	T436	21.7844	22.144	21.0374	23.8715	24.0237	23.5
O96028	Histone-lysine N-methyltransferase NSD2	WHSC1	IQDPT(0.001)EDAEAEDT(0.999)PR	T544	25.5031	23.8789	24.522	22.6408	21.3668	20.3318
P06748	Nucleophosmin	NPM1	SIRDT(1)PAKNAQK	T199	30.2634	30.4332	30.3473	27.9133	28.7536	28.5677
P16150	Leukosialin	SPN	RPT(1)LTTFFGR	T341	29.0925	28.8772	28.7245	26.709	26.9799	26.9466
P17096	High mobility group protein HMG-I/HMG-Y	HMGA1	KQPPVS(0.932)PGT(0.832)ALVGS(0.236)QKEPS(0.1)EVPT(0.9)PK	T39	23.9548	21.4007	23.4655	27.48	24.2807	27.1197
P19338	Nucleolin	NCL	GAT(1)PGKALVAT(1)PGKK	T121	29.5369	29.0235	29.6233	24.4808	28.3983	27.3375
P19338	Nucleolin	NCL	GAT(1)PGKALVAT(1)PGKK	T113	29.4998	28.9783	29.5922	22.5133	28.3586	27.2182
P19338	Nucleolin	NCL	T(0.002)VT(0.998)PAKAVT(0.23)T(0.77)PGKK	T99	24.3742	23.9975	24.235	21.243	22.4447	21.0165
P19338	Nucleolin	NCL	T(0.002)VT(0.998)PAKAVT(0.23)T(0.77)PGKK	T106	24.3742	23.9975	24.235	22.4714	22.4447	21.4275
P30041	Peroxiredoxin-6	PRDX6	DFT(1)PVCTTELGR	T44	21.8956	21.3394	21.7146	24.535	24.8257	24.766
P31942	Heterogeneous nuclear ribonucleoprotein H3	HNRNPH3	MGMGNNYSGGYGT(1)PDGLGGYGR	T314	26.0047	25.7129	25.8215	24.035	24.4126	23.3879
P35251	Replication factor C subunit 1	RFC1	NKPLS(1)PIKLT(0.99)PT(0.008)S(0.002)VLDYFGTGSVQR	T161	25.9968	25.5215	25.7805	20.6506	21.5113	20.8602
P35612	Beta-adducin	ADD2	WLNT(1)PNTYLR	T436	23.4863	24.3752	24.7521	22.5433	20.9699	22.1961
P35658	Nuclear pore complex protein Nup214	NUP214	HAPVVRT(0.998)PS(0.995)IQPS(0.007)LLPHAAPFAK	T1021	23.4383	23.1561	25.0794	20.4948	21.8524	21.153
P45985	Dual specificity mitogen-activated protein kinase kinase 4	MAP2K4	ILDQMPAT(1)PS(0.101)S(0.899)PMYVD	T391	23.513	24.0781	23.9689	21.7686	20.9481	21.5449
P46013	Antigen KI-67	MKI67	AQS(0.002)LVIS(0.991)PPAPS(0.952)PRKT(0.83)PVAS(0.225)DQR	T588	23.7017	23.682	23.7811	21.7113	21.7737	21.6467
P49006	MARCKS-related protein	MARCKSL1	AAAT(1)PESQEPQAK	T148	30.6483	30.3191	30.18	27.135	26.891	25.5118
P49321	Nuclear autoantigenic sperm protein	NASP	DGAVNGPSVVGDQT(1)PIEPQTSIER	T390	27.3155	27.3824	27.0505	24.3907	24.1742	23.9613
P49915	GMP synthase [glutamine-hydrolyzing]	GMPS	VINAAHSFYNGTTTLPIS(0.01)DEDRT(0.99)PR	T318	26.5786	27.2503	26.3244	21.5939	21.6652	22.4198
P50552	Vasodilator-stimulated phosphoprotein	VASP	S(0.009)S(0.009)S(0.009)S(0.003)VTTS(0.001)ET(0.001)QPCT(0.938)PS(0.022)S(0.008)S(0.001)DYSDLQR	T335	25.5608	25.1035	25.2457	22.2077	21.1745	22.7544
P60866	40S ribosomal protein S20	RPS20	DTGKT(1)PVEPEVAIHR	T9	26.0306	25.5143	25.9838	23.892	23.25	23.1182
P62877	E3 ubiquitin-protein ligase RBX1;E3 ubiquitin-protein ligase RBX1, N-terminally processed	RBX1	AAAMDVDT(0.993)PS(0.004)GT(0.002)NSGAGKK	T9	25.082	24.976	25.4323	20.6259	21.751	23.0922
Q03164	Histone-lysine N-methyltransferase 2A;MLL cleavage product N320;MLL cleavage product C180	KMT2A	S(0.011)ET(0.996)KS(0.993)GDKIK	T204	20.5995	26.2976	22.3006	27.5675	27.1788	27.2068
Q04637	Eukaryotic translation initiation factor 4 gamma 1	EIF4G1	LQGINCGPDFT(0.998)PS(0.002)FANLGR	T667	24.5172	24.3387	24.186	21.752	22.3042	21.9156
Q13263	Transcription intermediary factor 1-beta	TRIM28	GAAAAATGQPGTAPAGT(1)PGAPPLAGMAIVK	T541	24.2312	25.8025	25.3757	22.5876	22.5642	21.9916
Q13541	Eukaryotic translation initiation factor 4E-binding protein 1	EIF4EBP1	VVLGDGVQLPPGDYS(0.002)T(0.04)T(0.956)PGGT(0.004)LFS(0.466)T(0.324)T(0.179)PGGT(0.028)RIIY(0.001)DRK	T37	22.2249	26.3558	22.9961	26.5216	26.683	27.1639
Q14008	Cytoskeleton-associated protein 5	CKAP5	HS(0.065)T(0.057)S(0.05)GT(0.828)DEGEDGDEPDDGSNDVVDLLPR	T832	21.4842	21.9295	22.563	24.4589	24.995	24.3629
Q5T1Z4	Pumilio homolog 1	PUM1	HRWPT(1)GDNIHAEHQVR	T112	22.0726	21.7405	22.2133	23.9498	23.4668	24.345
Q14966	Zinc finger protein 638	ZNF638	QSSVT(0.001)QVT(0.975)EQS(0.018)PKVQS(0.006)R	T125	25.1277	25.499	25.0525	20.5388	21.0664	20.2371
Q15042	Rab3 GTPase-activating protein catalytic subunit	RAB3GAP1	AAAMT(1)PPEEELKR	T908	25.6641	24.9769	24.2551	22.1165	22.3381	21.2501
Q16539	Mitogen-activated protein kinase 14	MAPK14	HTDDEMT(1)GY(1)VATR	T180	28.6405	28.4871	28.6346	24.0516	25.9223	25.6978
Q16643	Drebrin	DBN1	SPSDSSTAS(0.006)T(0.994)PVAEQIER	T346	25.4705	25.3591	25.2709	24.2128	21.8986	21.5691
Q1ED39	Lysine-rich nucleolar protein 1	KNOP1	ESGVAGDPWKEET(1)DT(1)DLEVVLEKK	T310	22.3144	22.1109	23.1689	24.9146	24.0095	24.6158
Q4KMP7	TBC1 domain family member 10B	TBC1D10B	ALAAGADS(0.908)PKT(0.091)EEARPS(0.138)PAPGPGT(0.789)PT(0.078)GT(0.931)PT(0.065)R	T152	24.1642	23.9882	24.5154	26.9007	26.0846	25.8564
Q5JTH9	RRP12-like protein	RRP12	LGKSEAPET(1)PMEEEAELVLTEK	T77	25.7347	25.6834	25.3716	21.1776	22.4005	21.6543
Q5T6F2	Ubiquitin-associated protein 2	UBAP2	SQASKPAYGNSPYWT(1)N	T1118	25.7949	25.8488	25.8276	23.309	23.516	22.5793
Q66K14	TBC1 domain family member 9B	TBC1D9B	QFS(0.005)T(0.987)AS(0.008)DHEQPGVSG	T1239	26.0217	25.7692	25.7272	23.8931	23.6685	20.9928
Q6P1Q9	Methyltransferase-like protein 2B	METTL2B	T(0.003)QT(0.997)PPVEENVTQK	T154	25.5141	25.3072	25.3742	22.3818	21.0862	20.8542
Q6PKC3	Thioredoxin domain-containing protein 11	TXNDC11	LGAPS(0.002)S(0.075)T(0.923)QVK	T630	20.1423	21.5666	26.0816	26.5652	26.1646	25.9367
Q76FK4	Nucleolar protein 8	NOL8	EYDS(1)GDT(1)DEIIAMKK	T381	24.0587	23.8502	24.2334	26.7356	26.0738	25.6829
Q7KZF4	Staphylococcal nuclease domain-containing protein 1	SND1	EADGS(0.203)ET(0.797)PEPFAAEAK	T240	23.8575	23.9282	24.5279	21.5578	21.4038	21.7359
Q86TB9	Protein PAT1 homolog 1	PATL1	AVPIGT(1)PPK	T194	22.5967	22.0619	21.661	25.2446	23.9689	24.2343
Q86TI2	Dipeptidyl peptidase 9	DPP9	AT(0.003)T(0.004)GT(0.972)PT(0.02)ADRGDAAATDDPAAR	T6	24.9134	24.5233	24.8905	22.5798	21.3257	21.5934
Q86VQ1	Glucocorticoid-induced transcript 1 protein	GLCCI1	SIDTQT(0.999)PS(0.001)VQER	T350	23.045	22.3784	21.0836	26.6101	26.6464	26.504
S4R3V8	Lipolysis-stimulated lipoprotein receptor	LSR	GPALT(1)PIRDEEWGGHSPR	T405	23.9666	23.0137	23.1369	21.4859	21.0999	21.3506
Q86YS7	C2 domain-containing protein 5	C2CD5	QQT(1)QSALEQR	T339	24.4797	25.0626	24.0192	21.6726	20.8857	19.6526
Q8IXS8	Protein FAM126B	FAM126B	VEVT(0.982)PT(0.018)VPR	T306	21.6662	21.6343	20.4393	24.4742	24.134	23.572
Q8IXT5	RNA-binding protein 12B	RBM12B	S(0.109)PT(0.891)EDFR	T640	21.6957	24.7428	20.8271	25.4954	24.6748	24.9879
Q8IZL8	Proline-, glutamic acid- and leucine-rich protein 1	PELP1	AGSNEDPILAPS(0.02)GT(0.979)PPPTIPPDETFGGRVPR	T745	22.8535	25.7483	22.9524	26.854	26.2009	26.5795
Q8WYP5	Protein ELYS	AHCTF1	GLSQNQQIPQNS(0.045)VT(0.955)PR	T1808	26.1282	25.2773	25.6335	23.5053	20.8542	23.503
Q92917	G patch domain and KOW motifs-containing protein	GPKOW	GLGLGANLTEAQALT(0.999)PT(0.001)GPSR	T216	26.1877	25.7347	25.7651	23.6981	23.9656	23.481
Q96AG3	Solute carrier family 25 member 46	SLC25A46	S(0.068)FS(0.852)T(0.089)GS(0.99)DLGHWVT(0.049)T(0.949)PPDIPGS(0.003)R	T45	24.8107	23.9576	24.2509	20.3814	20.7404	21.7051
Q96B36	Proline-rich AKT1 substrate 1	AKT1S1	LNT(0.997)S(0.003)DFQKLK	T246	23.5612	22.7755	22.976	27.2589	27.8861	27.6308
Q96T58	Msx2-interacting protein	SPEN	IPSTENSSQEIS(0.001)VEERT(0.942)PT(0.057)K	T2421	21.1663	23.2928	21.4871	24.6497	24.5175	23.808
Q99961	Endophilin-A2	SH3GL1	SSDKPIRT(0.995)PS(0.005)R	T298	25.0771	25.1255	24.5744	22.0868	22.5985	21.6468
Q9BXL5	Hemogen	HEMGN	ILPCPT(0.024)S(0.024)EDT(0.95)ADLAGCS(0.002)LQAYPKPDVPK	T250	25.4264	25.3446	26.0142	20.9205	21.2976	21.5987
Q9BXS6	Nucleolar and spindle-associated protein 1	NUSAP1	LSVAS(0.004)T(0.996)PIS(1)QR	T244	25.9119	24.1475	25.2783	22.299	21.9367	21.6345
Q9C0B5	Palmitoyltransferase ZDHHC5;Palmitoyltransferase	ZDHHC5	DS(0.001)PPT(0.905)PT(0.094)MY(0.001)K	T348	21.6423	23.6039	21.4045	25.2007	24.6945	24.126
Q9H0L4	Cleavage stimulation factor subunit 2 tau variant	CSTF2T	GPVT(1)PGGLPPR	T320	24.0449	23.8048	23.7451	21.7874	21.1401	21.984
Q9H8Y8	Golgi reassembly-stacking protein 2	GORASP2	ADAASSLTVDVT(0.886)PPT(0.114)AK	T415	20.9106	21.5042	20.77	25.4912	25.245	26.0072
Q9H8Y8	Golgi reassembly-stacking protein 2	GORASP2	APT(0.005)T(0.005)VEDRVGDS(0.143)T(0.84)PVS(0.007)EKPVSAAVDANASES(1)P	T433	28.3783	28.6497	29.0661	24.9181	24.7969	25.9828
Q9HAW4	Claspin	CLSPN	S(0.68)LS(0.278)S(0.048)DS(0.997)T(0.997)LLLFK	T724	21.4542	22.0499	21.052	26.0395	26.0475	26.0973
Q9HCD5	Nuclear receptor coactivator 5	NCOA5	S(0.004)S(0.004)T(0.99)DS(0.002)LPGPISR	T379	23.9646	22.9426	21.8685	26.2256	25.2246	26.1091
Q9NYF8	Bcl-2-associated transcription factor 1	BCLAF1	RPKEEEWDPEY(0.006)T(0.994)PK	T840	25.3885	25.4155	25.5644	21.2835	21.4655	24.0079
Q9NZN5	Rho guanine nucleotide exchange factor 12	ARHGEF12	VTEHGT(1)PKPFR	T736	21.3894	21.3653	22.1343	23.4848	23.6136	23.7948
Q9P2P6	StAR-related lipid transfer protein 9	STARD9	PT(1)NNRGQPR	T1169	23.5832	23.7452	23.8111	21.4997	22.0869	21.4852
Q9UHR4	Brain-specific angiogenesis inhibitor 1-associated protein 2-like protein 1	BAIAP2L1	TPASTPVS(0.001)GT(0.999)PQAS(1)PMIER	T257	23.1715	23.1125	22.6793	26.766	25.6391	26.0314
Q9UKA4	A-kinase anchor protein 11	AKAP11	SLT(1)DSCLFEK	T1485	22.0387	21.5842	20.8762	25.6042	25.3347	25.3337
Q9UQ35	Serine/arginine repetitive matrix protein 2	SRRM2	EGRPPEPT(1)PAKR	T2599	24.0471	24.0505	23.8762	21.5193	21.8231	21.3486
Q9UQ35	Serine/arginine repetitive matrix protein 2	SRRM2	HGGS(0.997)PQPLAT(0.08)T(0.923)PLSQEPVNPPS(0.183)EAS(0.662)PT(0.156)R	T384	27.8445	27.9058	28.2523	24.9135	25.6085	25.5217
Q9UQ35	Serine/arginine repetitive matrix protein 2	SRRM2	QGS(0.016)IT(0.758)S(0.228)PQANEQS(0.161)VT(0.837)PQRR	T856	21.1228	21.7227	26.8654	26.7425	27.4752	26.5239
Q9UQ35	Serine/arginine repetitive matrix protein 2	SRRM2	TAVAPSAVNLADPRT(0.964)PT(0.036)APAVNLAGAR	T2289	28.7133	28.0725	28.222	25.9231	26.6274	21.2205
Q9Y383	Putative RNA-binding protein Luc7-like 2	LUC7L2;C7orf55-LUC7L2	AMLDQLMGT(0.915)S(0.085)R	T17	22.5201	22.638	22.5098	25.6112	24.0318	24.2046
Q9Y4E8	Ubiquitin carboxyl-terminal hydrolase 15	USP15	IST(0.002)ET(0.003)EET(0.798)EGS(0.197)LHCCK	T627	24.2184	23.6566	23.1163	21.264	21.1172	20.8978
Q9Y613	FH1/FH2 domain-containing protein 1	FHOD1	QLWDSPETAPAART(1)PQS(1)PAPCVLLR	T495	25.5965	25.1831	25.9065	21.1405	23.0687	20.8568
Q9Y6A5	Transforming acidic coiled-coil-containing protein 3	TACC3;ERIC-1s	VTFQT(1)PLRDPQTHR	T59	25.2846	25.1533	24.6732	21.9734	21.8296	23.4857
Q9Y6G9	Cytoplasmic dynein 1 light intermediate chain 1	DYNC1LI1	KPVTVS(0.962)PT(0.037)T(1)PTS(0.995)PT(0.005)EGEAS	T513	28.7551	30.8384	30.8269	26.2309	24.4281	26.3646
A0A0A0MRB9	X-linked interleukin-1 receptor accessory protein-like 2	IL1RAPL2	AFFGFSGES(1)GPMIY(1)WMK	Y23	21.1177	28.9211	20.9806	29.1264	29.03	28.8814
H0Y9F4	Epithelial discoidin domain-containing receptor 1	DDR1	NLY(1)AGDY(0.874)Y(0.126)R	Y153	21.6631	21.9847	21.5872	24.1639	23.4623	23.6842
A0A0U1RR39	E3 ubiquitin-protein ligase CBL	CBL	IKPSSS(0.001)ANAIY(0.802)S(0.197)LAARPLPVPK	Y630	21.1649	20.7856	21.6601	25.3524	26.4226	26.4194
A0A1B0GTW1	Tight junction protein ZO-2	TJP2	IEIAQKHPDIY(1)AVPIK	Y1177	21.4668	21.5476	21.6097	24.1388	23.324	22.9995
A0A1W2PPZ3	Mitogen-activated protein kinase 8;Mitogen-activated protein kinase 10	MAPK8;MAPK10	TAGT(0.001)S(0.984)FMMT(0.014)PY(1)VVTR	Y45	26.3868	26.5161	25.9851	22.0479	20.7812	20.1923
H0Y5H7	Activated CDC42 kinase 1	TNK2	Y(1)ATPQVIQAPGPR	Y394	21.0141	21.7323	21.1953	24.2118	23.703	23.4491
D7R525	Mitogen-activated protein kinase 9	MAPK9	TACTNFMMT(1)PY(0.998)VVT(0.002)R	Y185	24.5581	24.9644	24.4385	21.3227	21.8409	22.4751
H0YE41	Tyrosine-protein kinase;Non-receptor tyrosine-protein kinase TYK2	TYK2	LLAQAEGEPCY(1)IR	Y71	23.6333	21.4834	23.2564	25.9272	25.2884	24.9997
P11274	Breakpoint cluster region protein	BCR	LASQLGVY(1)R	Y591	25.1546	25.0158	25.0344	23.2329	23.0369	23.0997
Q16539	Mitogen-activated protein kinase 14	MAPK14	HTDDEMT(1)GY(1)VATR	Y182	28.5785	28.441	28.6461	24.0516	25.9223	25.6978
A0A1B0GWH8	Battenin	CLN3	RFS(1)DS(1)EGEETVPEPR	S12	25.8752	25.4919	25.8812	26.0815	26.1182	25.8946
A0A1B0GWH8	Battenin	CLN3	RRFS(1)DS(1)EGEETVPEPR	S14	25.8571	25.7724	25.9847	26.2915	26.1602	25.7135
C9JMQ6	Vigilin	HDLBP	VATLNS(1)EEESDPPTYK	S31	25.9193	25.7527	25.7158	27.5256	27.004	26.7961
A0A024R571	EH domain-containing protein 1	EHD1	DKPTYDEIFYTLS(1)PVNGK	S470	22.9315	23.4397	23.4284	24.5195	23.4382	22.9068
H3BT36	Proteasome subunit alpha type;Proteasome subunit alpha type-2	PSMA2	GYSFSLTT(0.006)FS(0.833)PS(0.16)GK	S14	21.9933	21.9693	22.8754	22.8231	20.3757	21.3586
A0A024RAC6	Transcription elongation factor B polypeptide 3	TCEB3	SYS(1)PDHR	S125	23.0007	23.1826	23.0655	21.9966	21.3684	21.3111
A0A024RCR6	Large proline-rich protein BAG6	BAT3;BAG6	PLT(0.005)S(0.995)PESLSR	S1075	26.0258	25.8105	25.0954	25.4334	25.3487	25.1941
A0A024RCR6	Large proline-rich protein BAG6	BAT3;BAG6	APPQTHLPSGASSGTGSASAT(0.008)HGGGS(0.988)PPGT(0.004)R	S113	29.3453	28.0435	29.4611	28.3385	28.1627	28.9788
A0A024RCR6	Large proline-rich protein BAG6	BAT3;BAG6	VGDPPQPLPEEPMEVQGAERAS(1)PEPQR	S958	26.7025	26.5333	26.8776	27.7499	25.9407	25.414
A0A024RCR6	Large proline-rich protein BAG6	BAT3;BAG6	ENAS(1)PAPGTTAEEAMSR	S967	27.6378	27.1266	27.3412	27.6816	27.9153	25.9793
A0A024RCR6	Large proline-rich protein BAG6	BAT3;BAG6	LQEDPNYS(1)PQRFPNAQR	S1111	28.2424	27.8871	21.6421	28.1302	28.0754	28.3242
F8W708	Transcription cofactor vestigial-like protein 4	VGLL4	NSLDAS(0.088)RPAGLS(0.882)PT(0.029)LT(0.001)PGER	S149	24.9737	24.7781	24.8999	25.5038	25.3767	21.4088
A0A075B6F5	Unconventional myosin-XVIIIb	MYO18B	AGS(1)DEGNLSLR	S2296	23.044	22.4915	22.9078	23.758	23.7537	23.2959
A0A075B6F5	Unconventional myosin-XVIIIb	MYO18B	GPS(0.008)VPS(0.992)AGK	S620	24.7462	21.2432	22.6448	23.8115	23.6456	23.057
E7EQR9	Dystrophin	DMD	SDS(1)SQPMLLR	S894	26.1718	25.6138	26.1242	24.626	24.6029	24.1112
A0A075B6Q3	BCL-6 corepressor-like protein 1	BCORL1	CLPGVLAS(1)PELR	S96	24.6108	24.3999	24.5956	23.2411	23.4726	23.1635
A0A075B6Q3		BCORL1	SASSEEAS(0.004)ES(0.966)PT(0.03)AR	S1076	23.8744	23.0949	23.5265	20.7969	23.4164	22.6995
A0A075B6T1	Activating molecule in BECN1-regulated autophagy protein 1	AMBRA1	LELSSSAS(1)PQEER	S549	25.5532	25.3986	25.7132	26.5774	25.8001	25.8222
A0A075B784	Ubiquitin carboxyl-terminal hydrolase;Ubiquitin carboxyl-terminal hydrolase 36	USP36	DVVLS(0.006)T(0.037)S(0.957)PK	S582	26.495	26.3312	26.5151	26.5112	26.6955	20.9005
A0A075B784	Ubiquitin carboxyl-terminal hydrolase;Ubiquitin carboxyl-terminal hydrolase 36	USP36	GSS(0.001)S(0.004)S(0.121)S(0.821)PEHS(0.033)AS(0.005)S(0.012)DS(0.002)T(0.002)KAPQTPR	S614	25.3	25.3285	25.4204	21.7169	25.3267	25.5424
A0A075B784	Ubiquitin carboxyl-terminal hydrolase;Ubiquitin carboxyl-terminal hydrolase 36	USP36	LALS(1)AKK	S692	22.6039	22.601	22.6089	21.9396	21.5952	21.5215
A0A075B784	Ubiquitin carboxyl-terminal hydrolase;Ubiquitin carboxyl-terminal hydrolase 36	USP36	NIGNGIIS(0.824)S(0.173)PLT(0.002)GK	S463	23.2921	22.5383	23.3752	23.0478	21.7951	23.0193
A0A075B784	Ubiquitin carboxyl-terminal hydrolase;Ubiquitin carboxyl-terminal hydrolase 36	USP36	NIGNGIIS(0.162)S(0.825)PLT(0.013)GK	S464	23.9012	20.3261	23.8917	23.6162	23.2959	23.6537
A0A075B784	Ubiquitin carboxyl-terminal hydrolase;Ubiquitin carboxyl-terminal hydrolase 36	USP36	QPGS(1)PMYR	S871	22.8349	22.3396	22.5452	23.6357	23.3556	22.5493
A0A075B785	LisH domain and HEAT repeat-containing protein KIAA1468	KIAA1468	AGS(0.999)IS(0.001)TLDSLDFAR	S180	25.0041	24.8529	24.4286	24.4513	24.5389	24.9435
A0A075B797	Nitric oxide synthase-interacting protein	NOSIP	ALSGT(0.005)S(0.995)PDDVQPGPSVGPPSKDKDK	S118	24.5617	24.0488	24.1859	22.1015	23.2719	22.5543
A0A075B7E9	SLIT-ROBO Rho GTPase-activating protein 2	SRGAP2	LDS(1)PQIR	S203	22.255	22.398	21.9112	22.7842	22.2776	22.1675
Q96HA1	Nuclear envelope pore membrane protein POM 121C;Nuclear envelope pore membrane protein POM 121	POM121C;POM121	APPTLQAETATKPQAT(0.006)S(0.033)APS(0.961)PAPK	S697	29.3889	28.1235	27.8767	27.0852	27.3343	26.3503
Q96HA1	Nuclear envelope pore membrane protein POM 121C;POM121 and ZP3 fusion protein;Nuclear envelope pore membrane protein POM 121	POM121C;POMZP3;POM121	ETVLS(1)ALKEK	S314	21.3372	21.093	21.3275	22.8777	22.3717	21.9914
Q96HA1	Nuclear envelope pore membrane protein POM 121C;Nuclear envelope pore membrane protein POM 121	POM121C;POM121	MVCS(1)PVTVR	S269	27.9301	27.4667	28.116	26.6181	26.5689	26.3657
Q96HA1	Nuclear envelope pore membrane protein POM 121C;Putative nuclear envelope pore membrane protein POM 121B;Nuclear envelope pore membrane protein POM 121	POM121C;POM121B;POM121	NGPS(0.001)S(0.044)S(0.955)PFS(0.03)S(0.916)PAS(0.042)S(0.011)R	S435	25.6623	25.4748	25.7104	24.2542	24.3665	24.5731
Q96HA1	Nuclear envelope pore membrane protein POM 121C;Putative nuclear envelope pore membrane protein POM 121B;Nuclear envelope pore membrane protein POM 121	POM121C;POM121B;POM121	NGPS(0.001)S(0.044)S(0.955)PFS(0.03)S(0.916)PAS(0.042)S(0.011)R	S439	25.6623	25.0065	25.3312	24.2542	24.3665	24.5731
Q96HA1	Nuclear envelope pore membrane protein POM 121C;Nuclear envelope pore membrane protein POM 121	POM121C;POM121	S(1)PAAAAAGAGER	S2	22.8104	22.907	21.8576	23.1443	22.1637	20.1114
A0A075B7F8	Nuclear envelope pore membrane protein POM 121C	POM121C	TLFAS(1)PPAK	S95	22.252	22.1065	21.3511	22.1724	21.0991	22.0575
A0A087WSV0	Bcl-2-like protein 12	BCL2L12	ACPGPPPPS(1)PEPLAR	S189	23.3982	22.3223	22.1765	23.1827	22.7343	23.2799
A0A087WSV0	Bcl-2-like protein 12	BCL2L12	LVRLS(0.984)S(0.015)DS(0.001)FAR	S158	25.7234	25.3501	25.0915	25.7613	25.5704	25.4162
A0A087WSV0	Bcl-2-like protein 12	BCL2L12	LS(0.003)S(0.974)DS(0.024)FAR	S159	22.4244	21.4965	21.6095	22.0968	21.3752	21.811
A0A087WSV0	Bcl-2-like protein 12	BCL2L12	LSS(0.003)DS(0.997)FAR	S161	24.0107	23.6055	23.9964	24.7156	24.3986	24.6096
A0A087WSV0	Bcl-2-like protein 12	BCL2L12	RGEAAGS(1)PVPT(0.995)PPRS(0.865)PAQEEPT(0.118)DFLS(0.022)R	S29	22.7823	24.6575	22.7518	24.8683	25.1759	25.2221
A0A087WW69	Translation initiation factor eIF-2B subunit delta	EIF2B4	KGEQGGPPPKAS(0.989)PS(0.011)TAGETPSGVK	S115	23.6363	24.6801	25.1594	24.8357	24.9323	21.9495
A0A087WW69	Translation initiation factor eIF-2B subunit delta	EIF2B4	QNS(0.996)LT(0.004)QFMSIPSSVIHPAMVR	S176	22.8976	23.0637	23.1262	21.6972	21.4683	21.6983
A0A087WTB8	Ubiquitin carboxyl-terminal hydrolase;Ubiquitin carboxyl-terminal hydrolase isozyme L3	UCHL3	FLEESVS(0.005)MS(0.995)PEER	S94	24.7459	24.2903	24.1109	22.5142	23.573	23.6682
H7C399	Cullin-3	CUL3	FLPS(1)PVVIK	S80	22.2367	21.8264	21.3628	21.7734	21.5682	21.9561
E9PLN0	Transcriptional activator Myb	MYB	IKQEVES(0.989)PT(0.011)DK	S532	23.7455	23.0048	22.598	24.7317	24.2393	23.1767
A0A087WTL4	Bcl-2-like protein 13	BCL2L13	EES(1)LVEELSPASEK	S396	24.1497	24.2807	24.4605	25.4697	24.1848	22.1123
A0A087WTL4	Bcl-2-like protein 13	BCL2L13	EESLVEELS(0.982)PAS(0.018)EK	S402	23.4151	21.7178	22.464	24.0455	21.7335	22.749
A0A087WTP3	Far upstream element-binding protein 2	KHSRP	LFIIRGS(1)PQQIDHAK	S480	25.5665	25.5952	25.6475	25.0945	25.295	25.0534
A0A087WTP3	Far upstream element-binding protein 2	KHSRP	VQIS(1)PDS(1)GGLPER	S181	28.3213	28.0367	27.994	28.159	27.668	27.6248
A0A087WTQ7	DNA damage-binding protein 2	DDB2	S(1)RS(1)PLELEPEAK	S24	24.6526	24.1857	24.5014	25.0185	24.8415	22.9207
A0A087WTQ7	DNA damage-binding protein 2	DDB2	S(1)RS(1)PLELEPEAK	S26	23.2221	21.8014	20.5129	23.149	22.4402	25.2532
A0A087WTT1	Polyadenylate-binding protein;Polyadenylate-binding protein 1;Polyadenylate-binding protein 1-like;Polyadenylate-binding protein 5	PABPC1;PABPC1L;PABPC5	S(1)GVGNIFIK	S71	21.3629	21.5484	22.2434	21.9207	20.626	21.0713
A0A087WTU3	Testis-expressed sequence 264 protein	TEX264	ETSAAT(0.053)LS(0.847)PGAS(0.073)S(0.026)R	S170	21.3128	25.7226	25.9297	25.099	25.4752	24.726
A0A087WTW5	CASP8-associated protein 2	CASP8AP2	CESIPACTTEELVS(0.001)GVAS(0.999)PCPK	S1368	23.1018	23.5094	23.5715	24.0239	23.7823	22.7565
A0A087WTW5	CASP8-associated protein 2	CASP8AP2	IGISETNKEDENS(1)LLVR	S658	22.7811	21.7354	22.071	23.378	22.9886	22.8755
A0A087WTW5	CASP8-associated protein 2	CASP8AP2	LNLT(0.002)LS(0.998)PAK	S567	23.2409	22.6644	22.9547	24.0609	23.1166	23.4127
A0A087WTY1		POLR1D	GSASYS(1)PPR	S76	24.9809	24.8195	24.378	25.6036	22.0888	25.3333
E9PS08	UBX domain-containing protein 1	UBXN1	YGGSVGSQPPPVAPEPGPVPS(0.818)S(0.141)PS(0.025)QEPPT(0.017)KR	S57	25.7751	21.0919	21.1703	24.3299	25.1721	24.5422
A0A087WU03		HNRNPDL	MEDMNEYS(1)NIEEFAEGSK	S8	23.2504	21.8724	23.108	25.5807	24.4764	23.8858
A0A087WU18	ETS-related transcription factor Elf-4	ELF4	S(0.033)T(0.033)S(0.923)PVT(0.012)DPSIPIR	S188	25.8615	25.3243	25.5261	26.26	26.2138	26.0653
Q13030	Glycophorin-A	GPErik;GYPA	S(0.001)PS(0.001)DVKPLPS(0.954)PDT(0.045)DVPLSSVEIENPETSDQ	S65	26.3383	26.2227	23.8887	22.055	24.6851	24.9831
Q13030	Glycophorin-A	GPErik;GYPA	KSPSDVKPLPS(0.011)PDT(0.01)DVPLS(0.99)S(0.989)VEIENPETSDQ	S73	26.0758	21.9103	21.274	24.8741	27.2451	23.1028
Q13030	Glycophorin-A	GPErik;GYPA	KSPSDVKPLPS(0.011)PDT(0.01)DVPLS(0.99)S(0.989)VEIENPETSDQ	S74	26.6588	27.0011	27.1891	28.459	28.2219	27.6239
Q13030	Glycophorin-A	GPErik;GYPA	KSPSDVKPLPSPDTDVPLSSVEIENPET(0.05)S(0.95)DQ	S83	27.5221	27.5707	27.3917	27.6834	27.7731	26.987
A0A087WU64	DNA polymerase;DNA polymerase alpha catalytic subunit	POLA1	IAS(1)PVSR	S209	27.4978	27.2812	26.5721	26.4199	25.8892	21.3604
A0A087WU64	DNA polymerase;DNA polymerase alpha catalytic subunit	POLA1	S(1)IGASPNPFSVHTATAVPSGK	S186	24.1902	24.2202	23.4765	24.6919	24.171	24.2559
A0A087WYD1	AP-2 complex subunit beta	AP2B1	T(0.002)DS(0.998)KYFTTNK	S4	24.4174	24.4478	24.4633	23.0785	22.8952	23.0607
A0A087WUB9	Beta-catenin-like protein 1	CTNNBL1	EYAENIGDGRS(1)PEFR	S550	21.4429	23.0516	23.3851	24.5681	23.1425	22.4975
A0A087WUK4	Nuclear receptor subfamily 2 group C member 1	NR2C1	DLRS(0.799)PLT(0.189)AT(0.011)PTFVTDSESTR	S215	23.3692	23.1397	22.5849	21.8494	23.2789	20.4966
A0A087WUT6	Eukaryotic translation initiation factor 5B	EIF5B	IEPIPGES(1)PK	S1168	24.5489	24.2923	24.3173	25.677	24.4571	24.4989
A0A087WUT6	Eukaryotic translation initiation factor 5B	EIF5B	QSFDDNDS(1)EELEDKDSK	S113	25.8538	30.338	29.5906	30.399	30.0077	30.2801
A0A087WUT6	Eukaryotic translation initiation factor 5B	EIF5B	WDGS(1)EEDEDNSKK	S164	26.8508	27.5198	27.3429	26.8442	27.1017	27.0842
A0A087WUT6	Eukaryotic translation initiation factor 5B	EIF5B	NKPGPNIES(1)GNEDDDAS(1)FKIK	S214	31.7334	31.1747	30.9637	31.472	31.7055	31.1625
A0A087WUT6	Eukaryotic translation initiation factor 5B	EIF5B	NKPGPNIES(1)GNEDDDAS(1)FKIK	S222	20.6964	20.1809	24.8432	24.2005	24.4718	23.8998
A0A087WUT6	Eukaryotic translation initiation factor 5B	EIF5B	VEMYS(1)GS(1)DDDDDFNKLPK	S135	29.8189	29.7593	30.3339	30.9921	30.6139	30.0813
A0A087WUT6	Eukaryotic translation initiation factor 5B	EIF5B	VEMYS(1)GS(1)DDDDDFNKLPK	S137	29.881	29.7996	30.3631	31.0123	30.6392	30.1011
A0A087WUV8	Basigin	BSG	RKPEDVLDDDDAGS(1)APLK	S166	25.0867	22.8076	24.7065	25.5464	25.3285	25.0033
A0A087WUZ3	Spectrin beta chain, non-erythrocytic 1	SPTBN1	T(0.12)S(0.166)S(0.714)KES(0.002)S(0.998)PIPS(0.988)PT(0.01)S(0.002)DR	S2167	24.839	24.8542	23.2222	25.628	25.376	25.1654
A0A087WUZ3	Spectrin beta chain, non-erythrocytic 1	SPTBN1	T(0.019)S(0.025)S(0.956)KES(0.031)S(0.969)PIPS(0.989)PT(0.009)S(0.002)DR	S2171	24.839	24.8542	24.8408	25.628	25.376	25.1654
A0A087WUZ3	Spectrin beta chain, non-erythrocytic 1	SPTBN1	RFS(1)LFGK	S2360	22.8056	22.2588	21.8741	21.9346	23.124	22.147
A0A087WUZ3	Spectrin beta chain, non-erythrocytic 1	SPTBN1	RPPS(1)PEPSTK	S2104	27.1788	26.9021	26.9027	27.7141	27.6157	27.4741
A0A087WUZ3	Spectrin beta chain, non-erythrocytic 1	SPTBN1	T(0.019)S(0.025)S(0.956)KES(0.031)S(0.969)PIPS(0.989)PT(0.009)S(0.002)DR	S2163	24.839	24.8542	24.2723	24.9215	25.376	25.1654
B5LMG6	Protein aurora borealis	C13orf34;BORA	TASPFQCS(0.007)S(0.993)P	S618	23.6417	24.0081	23.6378	24.1891	24.4981	24.1896
A0A087WVA8	Testis-expressed sequence 2 protein	TEX2	RLS(1)EVIYEPFQLLSK	S295	24.307	23.3446	22.7319	22.4681	21.5148	20.9784
A0A087WVA8	Testis-expressed sequence 2 protein	TEX2	TAPS(0.023)S(0.976)PLT(0.046)S(0.839)PS(0.112)DT(0.004)R	S266	24.7369	24.4103	24.6312	24.2704	24.4182	24.4045
A0A087WVA8	Testis-expressed sequence 2 protein	TEX2	TAPS(0.023)S(0.976)PLT(0.046)S(0.839)PS(0.112)DT(0.004)R	S270	24.7369	24.4103	21.8856	24.2704	24.4182	24.4045
A0A087WVA8	Testis-expressed sequence 2 protein	TEX2	TS(0.001)S(0.999)LVLEK	S399	22.4763	21.1079	22.02	21.4092	21.9997	21.1915
K7EK53	Eukaryotic translation initiation factor 3 subunit K	EIF3K	IDFDSVSSIMAS(0.012)S(0.988)Q	S130	21.7334	22.0054	21.5012	23.1577	22.7158	22.8132
A0A087WVC1	ATP-dependent RNA helicase DDX50	DDX50	LNGDTEEGFNRLS(0.998)DEFS(0.001)K	S81	23.4727	23.7185	21.5993	24.4882	23.8119	23.7556
A0A087WVC5	Protein KRBA1	KRBA1	ADLGPGS(1)PPWAVK	S210	20.4219	22.5489	21.7653	22.5574	22.5645	21.8279
K7EQH1	Uncharacterized protein C18orf25	C18orf25;ARKL1	RDS(0.935)S(0.327)ES(0.736)QLAS(0.001)TESDKPTTGR	S66	25.9732	25.4226	25.3598	26.0036	25.6948	25.818
A0A087WVF7	Intersectin-2	ITSN2	TVS(1)PGS(0.061)VS(0.939)PIHGQGQVVENLK	S867	25.9568	25.9769	26.312	28.0115	27.0923	27.8946
A0A087WVF7	Intersectin-2	ITSN2	TVSPGS(0.001)VS(0.999)PIHGQGQVVENLK	S872	27.2521	24.2086	27.2088	28.0389	27.3521	27.4078
A0A087WVI0	Conserved oligomeric Golgi complex subunit 1	COG1	ATAAT(0.063)S(0.937)PALK	S7	25.0579	25.033	24.5523	24.8955	25.2212	25.1731
A0A087WVP4	Smoothelin	SMTN	SLSVLS(1)PR	S360	21.5603	23.1044	23.6795	22.7861	22.8577	22.8817
A0A087WVP4	Smoothelin	SMTN	VNS(1)PGTLAR	S570	26.4613	25.9232	26.1029	24.5899	24.9122	24.6312
A0A087WVV2	Ribosome-binding protein 1	RRBP1	ELVEKS(1)EAVR	S366	21.6612	21.3973	21.9565	22.7522	22.5081	20.6561
H7C4X9	Protein kinase C-binding protein 1	ZMYND8	ELSESVQQQSTPVPLIS(1)PK	S474	25.2228	25.1977	24.873	25.5029	24.9322	24.9298
H7C4X9	Protein kinase C-binding protein 1	ZMYND8	GKDETDSPTVHLGLDS(0.998)DS(0.964)ES(0.038)ELVIDLGEDHSGR	S634	21.1969	23.1108	24.203	23.8072	22.7891	22.4528
H7C4X9	Protein kinase C-binding protein 1	ZMYND8	GKDETDSPTVHLGLDS(0.998)DS(0.964)ES(0.038)ELVIDLGEDHSGR	S636	21.8791	23.1108	24.203	23.8072	22.7891	22.4528
H7C4X9	Protein kinase C-binding protein 1	ZMYND8	RIS(0.998)LS(0.002)DMPR	S352	26.5219	25.9647	26.0406	24.7909	24.8349	24.1947
H7C4X9	Protein kinase C-binding protein 1	ZMYND8	SPMSTNSSVHT(0.042)GS(0.958)DVEQDAEKK	S371	24.8713	25.9316	25.6138	25.7146	21.275	24.95
H7C4X9	Protein kinase C-binding protein 1	ZMYND8	LNFDMT(0.003)AS(0.997)PK	S333	21.7068	23.7705	21.5955	24.4146	24.0924	24.1427
H7C4X9	Protein kinase C-binding protein 1	ZMYND8	TPPSTTVGSHS(0.999)PPET(0.001)PVLTR	S683	26.3019	25.801	26.8289	27.3736	26.8186	26.422
H7C4X9	Protein kinase C-binding protein 1	ZMYND8	STS(1)PASEKADPGAVK	S579	25.6838	25.6302	25.8525	26.8723	25.3169	24.8695
H7C4X9	Protein kinase C-binding protein 1	ZMYND8	S(0.006)T(0.007)S(0.987)PAS(1)EKADPGAVK	S582	23.6793	23.8892	23.4723	25.3806	23.8153	22.7094
H7C4X9	Protein kinase C-binding protein 1	ZMYND8	TGQAGSLS(0.049)GS(0.951)PKPFS(0.99)PQLS(0.009)APITTK	S422	24.2749	25.8127	24.094	26.2829	25.1398	25.6951
A0A087WW66	26S proteasome non-ATPase regulatory subunit 1	PSMD1	TSSAFVGKT(1)PEAS(1)PEPK	S315	25.2839	25.2637	25.4439	25.6592	25.2264	25.7111
J3QRV5	Lethal(2) giant larvae protein homolog 2;Lethal(2) giant larvae protein homolog 1	LLGL2;LLGL1	SLRQS(1)FR	S653	24.973	21.4687	25.2609	25.1534	25.3814	25.0656
A0A087WWA3	Kinesin-like protein;Kinesin-like protein KIF1B	KIF1B;KIF1Bbeta	MSDT(0.003)GS(0.997)PGMQR	S1428	20.8148	23.0018	23.7493	24.1284	24.2534	23.7212
A0A087WWA3	Kinesin-like protein;Kinesin-like protein KIF1B	KIF1B;KIF1Bbeta	SGLS(1)LEELR	S1031	25.6821	25.4131	25.4607	25.7952	25.9072	25.7624
A0A087WWF4	Kanadaptin	SLC4A1AP	KPALPVS(1)PAAR	S28	23.4131	23.9196	24.043	24.8014	23.3419	23.5495
A0A087WWF4	Kanadaptin	SLC4A1AP	KMLGEDS(1)DEEEEMDTSER	S82	23.5552	25.172	26.071	26.4562	26.6964	25.5937
A0A087WWK8	IQ motif and SEC7 domain-containing protein 1	IQSEC1	ACLDDS(0.994)Y(0.001)AS(0.005)GEGLKR	S896	24.3454	24.2487	24.3435	22.4611	22.7233	23.1151
A0A087WWK8	IQ motif and SEC7 domain-containing protein 1	IQSEC1	ACLDDS(0.726)Y(0.322)AS(0.952)GEGLKR	S899	23.4551	23.3465	23.4477	21.4349	22.3373	21.8501
A0A087WWK8	IQ motif and SEC7 domain-containing protein 1	IQSEC1	LQHS(0.002)T(0.038)S(0.96)ILRK	S75	27.8658	27.5662	27.3496	26.1873	26.0327	26.2417
A0A087WWK8	IQ motif and SEC7 domain-containing protein 1	IQSEC1	MQFS(1)FEGPEK	S166	22.9037	22.6502	22.6916	21.2042	21.6367	20.5578
A0A087WWK8	IQ motif and SEC7 domain-containing protein 1	IQSEC1	SLAES(1)IDDALNCR	S239	22.3077	22.9682	23.0599	21.7529	21.772	22.1314
A0A087WWK8	IQ motif and SEC7 domain-containing protein 1	IQSEC1	SLS(1)ESYELSSDLQDK	S93	22.1364	23.589	23.9213	25.2499	24.8177	24.6623
A0A087WWN2	Cullin-4A	CUL4A	KGS(1)FSALVGR	S10	28.1544	27.9087	27.8382	26.6267	26.768	26.3703
A0A087WWP4	Putative RNA-binding protein 15	RBM15	HCAPS(1)PDRS(1)PELSSSR	S626	26.9329	27.5828	27.3969	26.8875	27.4197	27.1422
A0A087WWP4	Putative RNA-binding protein 15	RBM15	HCAPS(1)PDRS(1)PELSSSR	S630	26.9329	27.5828	27.2206	26.7281	27.2927	27.0113
A0A087WWP4	Putative RNA-binding protein 15	RBM15	HLDRS(1)PESDRPR	S612	25.8968	25.695	25.7195	24.7214	25.3111	25.5664
A0A087WWP4	Putative RNA-binding protein 15	RBM15	LKS(0.989)PS(0.011)QKQDGGTAPVASASPK	S721	27.7174	27.2278	27.089	25.9517	26.7069	27.4883
A0A087WWP4	Putative RNA-binding protein 15	RBM15	LLLERPS(1)PIRDR	S656	25.5242	25.1825	25.0395	26.4946	25.0783	24.9726
A0A087WWP4	Putative RNA-binding protein 15	RBM15	S(1)LS(1)PGGAALGYR	S250	30.4254	30.1681	30.3169	30.8318	30.6967	30.5234
A0A087WWP4	Putative RNA-binding protein 15	RBM15	TTAPTEGKS(1)PLKK	S697	24.3724	23.7016	24.0164	24.5774	23.8682	23.756
A0A087WWS1	THO complex subunit 1	THOC1	TGEDEDEEDNDALLKENES(1)PDVRR	S560	23.6249	23.9834	23.4764	23.6789	22.939	23.434
A0A087WWS1	THO complex subunit 1	THOC1	MS(1)PTPPLFSLPEAR	S2	26.5323	26.3572	26.4524	25.9759	25.9168	26.0703
A0A087WWW8	Calcineurin-binding protein cabin-1	CABIN1	AYHELLEAS(1)LLR	S66	22.3119	21.5167	21.814	22.2757	22.1949	21.2863
A0A087WWW8	Calcineurin-binding protein cabin-1	CABIN1	GKNEES(1)LESTEGFR	S1389	24.918	24.4255	24.4598	25.7496	24.978	24.6163
A0A087WXE2	RNA pseudouridylate synthase domain-containing protein 2	RPUSD2	VELS(1)PGPPKPAGR	S35	25.6664	25.6891	25.5292	26.8647	25.6554	26.0834
A0A087WXU5	Nucleolar protein of 40 kDa	ZCCHC17	S(1)FQDYTGQK	S114	24.6576	25.0512	24.6605	24.3847	23.8201	23.7369
A0A087WXN4	Integrator complex subunit 12	INTS12	LEKPETQS(0.033)S(0.967)PITVQSSK	S128	26.0879	26.129	25.5033	25.578	26.5363	25.605
A0A087WXN9	MTSS1-like protein	MTSS1L	AGS(0.999)EECVFY(0.001)T(0.001)DETASPLAPDLAK	S611	21.9236	21.6259	21.266	23.9599	23.2836	23.1491
A0A087WXN9	MTSS1-like protein	MTSS1L	RLS(0.975)LPNT(0.025)AWGSPSPEAAGYPGAGAEDEQQQLAANR	S638	23.5098	24.1352	24.1715	24.3097	23.7947	22.1794
A0A087WXN9	MTSS1-like protein	MTSS1L	TPTVPDS(0.994)PGY(0.004)MGPT(0.002)R	S600	23.1604	21.9145	22.7593	25.2324	23.9825	24.0227
H7BXI1	Extended synaptotagmin-2	ESYT2	SSSSLLASPGHISVKEPT(0.012)PS(0.988)IAS(1)DIS(0.983)LPIAT(0.017)QELR	S718	23.8361	24.2278	24.4453	26.0249	25.2992	24.074
H7BXI1	Extended synaptotagmin-2	ESYT2	EPT(0.29)PS(0.711)IAS(1)DIS(1)LPIATQELR	S721	24.2882	24.4855	24.7957	25.4848	25.7488	24.236
H7BXI1	Extended synaptotagmin-2	ESYT2	EPT(0.001)PS(0.001)IAS(0.998)DIS(1)LPIATQELR	S724	23.8361	24.2278	24.4453	26.0249	25.2992	24.074
H7BXI1	Extended synaptotagmin-2	ESYT2	SSSSLLAS(0.99)PGHIS(0.009)VK	S706	21.7995	21.2713	21.1918	22.2467	21.8012	21.4116
A0A087WXV6	OTU domain-containing protein 5	OTUD5	PRAS(1)PPPQGPLPGPPGALHR	S40	23.6934	24.3217	24.0178	25.3092	24.62	24.8043
A0A087WXV6	OTU domain-containing protein 5	OTUD5	AT(0.02)S(0.98)PLVSLYPALECR	S479	26.3675	26.4385	25.9353	26.9545	26.559	26.0083
A0A087WXV6	OTU domain-containing protein 5	OTUD5	QAPGVGAVGGGS(1)PEREEVGAGY(0.001)NS(0.999)EDEYEAAAAR	S141	28.1202	28.2296	28.6653	28.8198	28.8663	28.5076
A0A087WXV6	OTU domain-containing protein 5	OTUD5	QAPGVGAVGGGS(1)PEREEVGAGYNS(1)EDEYEAAAAR	S153	28.1202	28.1389	28.5801	28.7926	28.8366	28.5076
A0A087WY28	Optineurin	OPTN	LNSSGSSEDS(1)FVEIR	S43	25.7719	25.7835	25.9923	24.7649	25.1261	25.2156
A0A087WY61	Nuclear mitotic apparatus protein 1	NUMA1	ALS(0.002)KAS(0.967)PNT(0.03)R	S2061	24.0819	23.7638	22.7113	23.1553	21.9504	23.84
A0A087WY61	Nuclear mitotic apparatus protein 1	NUMA1	APVPSTCSSTFPEELS(1)PPSHQAK	S169	26.94	26.1118	26.2829	26.6943	26.3231	26.1881
A0A087WY61	Nuclear mitotic apparatus protein 1	NUMA1	LGS(1)PDYGNSALLSLPGYRPTTR	S1846	26.156	25.0992	25.4202	23.6208	24.3896	22.4173
A0A087WY61	Nuclear mitotic apparatus protein 1	NUMA1	QAAS(1)PLEPK	S271	20.7719	25.1198	25.2814	24.6047	24.2535	24.0465
A0A087WY61	Nuclear mitotic apparatus protein 1	NUMA1	RAS(1)MQPIQIAEGTGITTR	S1953	23.7672	23.5999	23.2764	21.948	23.3314	23.1212
A0A087WY61	Nuclear mitotic apparatus protein 1	NUMA1	TQPDGTSVPGEPAS(0.998)PIS(0.002)QRLPPKVESLESLYFTPIPAR	S1741	28.449	28.1098	28.5911	29.363	28.1713	28.2981
A0A087WY82	Junctional adhesion molecule A	F11R	VIYSQPS(1)AR	S264	26.7987	25.8179	26.21	26.336	26.9443	26.3341
A0A087WY82	Junctional adhesion molecule A	F11R	VIYS(0.004)QPS(0.998)ARS(0.997)EGEFK	S267	25.1757	20.3243	23.4285	23.2915	23.6518	23.5992
A0A087WYH5		DDX27	MLADLGLIGTIGEDDEVPVEPES(1)DS(1)GDEEEEGPIVLGR	S23	24.755	27.2422	27.2355	27.2155	27.6796	27.3725
A0A087WYH5		DDX27	MLADLGLIGTIGEDDEVPVEPES(1)DS(1)GDEEEEGPIVLGR	S25	24.755	27.2422	27.2355	27.2155	27.6796	27.3725
A0A087WYN9	ATP-dependent RNA helicase DHX29	DHX29	FQS(1)PQIQAT(0.141)IS(0.859)PPLQPK	S192	24.0975	23.0595	23.6388	21.7652	22.369	21.9446
A0A087WYN9	ATP-dependent RNA helicase DHX29	DHX29	FQSPQIQATIS(1)PPLQPK	S200	26.2349	26.2023	26.5872	26.7605	26.471	26.0629
A0A087WYW3	NK-tumor recognition protein;Putative peptidyl-prolyl cis-trans isomerase	NKTR	AYRPPS(0.999)GEKWS(0.001)K	S79	22.7142	21.3037	21.462	22.6629	23.2169	22.9245
A0A087WYW3	NK-tumor recognition protein;Putative peptidyl-prolyl cis-trans isomerase	NKTR	ILIPS(0.998)DIES(0.001)S(0.001)K	S163	25.8403	25.1308	25.2641	26.0371	25.6694	25.6963
A0A087WYW3	NK-tumor recognition protein;Putative peptidyl-prolyl cis-trans isomerase	NKTR	SWSY(0.002)NGY(0.753)Y(0.101)S(0.149)DLS(0.813)T(0.182)AR	S119	22.3021	23.3131	21.8749	22.6138	22.2363	21.8559
A0A087WZ06	Serine/threonine-protein kinase 3;Serine/threonine-protein kinase 3 36kDa subunit;Serine/threonine-protein kinase 3 20kDa subunit	STK3	ELEEEEENS(1)DEDELDSHTMVK	S205	21.8696	25.4562	26.0781	26.5219	26.2758	25.2042
A0A087WZ13	Ribonucleoprotein PTB-binding 1	RAVER1	AADVSVTHRPPLS(1)PK	S14	30.5908	29.9323	30.7021	30.5554	30.5033	29.9994
A0A087WZ13	Ribonucleoprotein PTB-binding 1	RAVER1	AADVSVT(0.004)HRPPLS(0.996)PKS(1)GAEVEAGDAAER	S17	23.4686	23.9726	24.006	24.6199	24.2923	24.3617
A0A087WZ13		RAVER1	HKMS(1)PPPSGFGER	S617	21.5013	24.5974	24.4573	24.0702	25.9459	25.0914
A0A087WZ13		RAVER1	LLS(1)PLSSAR	S567	29.5404	29.4283	29.205	29.2969	29.4256	29.1519
A0A087WZ13		RAVER1	SSGGSGGGPLS(0.007)HFYS(0.012)GS(0.976)PT(0.005)SYFTSGLQAGLK	S643	25.2834	24.322	24.8122	21.6207	24.4575	21.8732
E5RHB5	Pleckstrin homology domain-containing family A member 2	PLEKHA2	S(0.052)QS(0.948)YIPTSGCR	S184	24.2705	24.1819	24.4524	24.5204	23.943	24.4524
A0A087WZ40	Ensconsin	MAP7	RLQLS(1)PWESSVVNR	S241	23.9163	23.22	23.2653	22.4671	23.0584	22.681
A0A087WZ40	Ensconsin	MAP7	LSS(0.048)S(0.929)S(0.023)ATLLNSPDR	S224	21.9045	21.5193	25.3284	24.8861	24.4484	24.5659
A0A087WZ40	Ensconsin	MAP7	S(0.916)VS(0.077)T(0.007)MNLSK	S203	21.8062	21.4767	21.0032	22.6334	22.1919	22.0357
A0A087WZ40	Ensconsin	MAP7	SVS(0.999)T(0.001)MNLSK	S205	26.1591	25.2647	26.2987	25.097	25.2079	21.9666
M0QZS0	Rho guanine nucleotide exchange factor 18	ARHGEF18	S(1)LS(1)PILPGR	S742	24.4203	24.3084	24.1281	24.6408	24.4744	24.1157
A0A087WZK9	Eukaryotic translation initiation factor 3 subunit H	EIF3H	DFS(1)PEALKK	S180	23.5336	23.0657	23.1859	23.9536	23.1131	23.6122
E5RGN0	Cyclin-dependent kinase 16	CDK16	QLS(1)MTLR	S12	23.2684	22.9419	23.3381	23.826	23.577	23.3134
A0A087WZV0	Inositol hexakisphosphate and diphosphoinositol-pentakisphosphate kinase 2	PPIP5K2	TAEISSTALRS(0.019)S(0.981)PIMR	S1207	24.2218	23.3135	24.0175	21.0246	25.0878	21.2502
A0A087WZV0	Inositol hexakisphosphate and diphosphoinositol-pentakisphosphate kinase 2	PPIP5K2	S(1)GEQIT(0.019)S(0.293)S(0.697)PVS(0.991)PK	S1021	23.0404	24.5036	24.5222	24.4094	25.1122	24.8015
A0A087WZV0	Inositol hexakisphosphate and diphosphoinositol-pentakisphosphate kinase 2	PPIP5K2	S(1)GEQIT(0.019)S(0.293)S(0.697)PVS(0.991)PK	S1031	23.0404	24.5036	24.5222	24.4094	25.1122	24.8015
F8VQD8	CCR4-NOT transcription complex subunit 2	CNOT2	TNSMSSSGLGS(1)PNR	S80	25.4886	25.3382	25.8563	25.6713	25.4315	24.9932
G3V2P6	Phospholipase DDHD1	DDHD1	SIDGKDAVHS(1)FK	S55	22.4237	22.4703	22.9932	23.4423	23.4344	20.4828
A0A087X0H9		RBM26	EGSTQQLQT(0.019)T(0.076)S(0.905)PK	S621	26.9506	27.0881	26.4389	25.4736	25.6163	25.9928
A0A087X0H9	RNA-binding protein 26	RBM26	LNHS(1)PPQSSSR	S127	25.0679	25.2397	24.9274	25.0491	25.3141	25.5525
A0A087X0H9	RNA-binding protein 26	RBM26	TNS(1)PGFQK	S523	24.8617	24.7928	24.2466	23.1068	24.143	23.4831
A0A087X0I9	Protein kinase C;Protein kinase C theta type	PRKCQ	ALINS(1)MDQNMFR	S649	23.9913	23.7242	25.222	23.2176	21.7154	21.6817
A0A087X0I9	Protein kinase C;Protein kinase C theta type	PRKCQ	NFS(1)FMNPGMER	S659	25.5181	25.7998	25.3399	24.86	24.9967	25.3526
G3V1L9	Tight junction protein ZO-1	TJP1	AIPVS(0.992)PS(0.008)AVEEDEDEDGHTVVATAR	S1617	27.3522	27.3961	26.7367	25.6214	25.7986	25.6678
G3V1L9	Tight junction protein ZO-1	TJP1	DDISEIQS(0.01)LAS(0.995)DHS(0.995)GR	S297	21.5102	22.9624	22.3884	24.255	22.887	22.8501
G3V1L9	Tight junction protein ZO-1	TJP1	DDISEIQS(0.01)LAS(0.995)DHS(0.995)GR	S300	21.8611	22.9624	22.3884	24.255	22.887	22.8501
G3V1L9	Tight junction protein ZO-1	TJP1	EIS(1)QDSLAAR	S212	22.7173	22.935	23.1364	23.9092	23.8112	23.708
A0A087X0K9		TJP1	IDS(1)PGFKPASQQVYR	S900	26.502	25.895	26.7375	26.3872	26.3387	25.7969
G3V1L9	Tight junction protein ZO-1	TJP1	VQIPVSRPDPEPVS(1)DNEEDS(0.929)Y(0.071)DEEIHDPR	S125	27.6371	28.2614	28.7609	28.4742	28.7232	28.824
G3V1L9	Tight junction protein ZO-1	TJP1	VQIPVS(0.007)RPDPEPVS(0.992)DNEEDS(0.987)Y(0.014)DEEIHDPR	S131	27.6371	28.1745	28.6785	28.416	28.7232	28.7937
G3V1L9	Tight junction protein ZO-1	TJP1	S(1)REDLSAQPVQTK	S617	25.035	24.0686	25.1157	26.0954	23.9513	23.5753
A0A087X0N3		NOL4L	ERS(1)PGDSELGR	S17	23.6078	23.514	22.9725	22.8718	23.8134	21.5948
A0A087X0P0	Kinesin-like protein;Centromere-associated protein E	CENPE	S(0.001)LPS(0.999)PHPVR	S2617	23.8115	23.2259	23.1388	22.657	22.3319	22.1088
H0Y6I7	Lysine-specific demethylase 6A	KDM6A	TDNSVAS(0.4)S(0.4)PS(0.098)S(0.098)AIS(0.007)T(0.014)AT(0.193)PS(0.791)PK	S427	24.6674	24.5915	24.6374	25.363	24.8921	24.9961
A0A087X0R7	Sentrin-specific protease 3	SENP3-EIF4A1;SENP3	FDS(1)PRGPPPPR	S118	24.8699	23.2322	22.4068	24.1661	24.8036	24.0452
A0A087X0R7	Sentrin-specific protease 3	SENP3-EIF4A1;SENP3	NHLS(1)PQQGGATPQVPSPCCR	S99	25.6553	25.3206	25.9148	26.179	26.0986	25.8607
A0A087X0R7	Sentrin-specific protease 3	SENP3-EIF4A1;SENP3	NHLSPQQGGATPQVPS(1)PCCR	S111	24.8608	25.6836	25.4965	25.3403	25.4364	25.5783
A0A087X0X3	Heterogeneous nuclear ribonucleoprotein M	HNRNPM	GCGVVKFES(1)PEVAER	S701	23.9717	23.5459	23.6845	23.7629	23.2798	23.3269
A0A087X0X3	Heterogeneous nuclear ribonucleoprotein M	HNRNPM	GNFGGS(1)FAGSFGGAGGHAPGVAR	S633	24.1966	24.0589	24.5042	23.3661	23.2055	20.9016
A0A087X0X3	Heterogeneous nuclear ribonucleoprotein M	HNRNPM	MGANS(1)LER	S575	27.3219	26.8536	27.035	27.1597	27.1467	27.0719
A0A087X0X3	Heterogeneous nuclear ribonucleoprotein M	HNRNPM	MGLS(1)MER	S528	23.8582	22.4193	23.8541	24.3545	24.4501	23.7978
A0A087X0X3	Heterogeneous nuclear ribonucleoprotein M	HNRNPM	MGS(1)GIER	S452	25.0573	24.9705	25.1404	24.3715	24.2284	24.2813
A0A087X0X3	Heterogeneous nuclear ribonucleoprotein M	HNRNPM	VGS(1)EIER	S432	23.4237	23.3095	23.4078	24.0256	23.3782	23.6948
B7ZBF2	Serine/threonine-protein kinase Chk2	CHEK2	KFAIGS(1)AR	S39	20.987	21.8725	21.5888	22.2866	21.8741	22.1813
A0A087X142	Septin-8	2019-09-08	AAT(0.002)DLERFS(0.998)NAEPEPR	S10	22.5652	22.4051	22.4942	22.411	22.1494	21.7225
S4R3Y0	MAP3K12-binding inhibitory protein 1	MBIP	LQS(1)PIKEENTTAVEEIGR	S49	23.8663	23.318	23.4979	23.284	23.303	21.2558
H0Y786	Nebulin	NEB	NQEMMS(1)QIK	S816	21.2776	21.9234	23.0529	23.2989	23.2545	22.9177
A0A087X1T3	Conserved oligomeric Golgi complex subunit 8	COG8	ELS(0.999)GS(0.001)GLER	S39	23.2336	23.0772	23.337	21.6952	22.1037	22.2898
A0A087X1U1	Arf-GAP with GTPase, ANK repeat and PH domain-containing protein 1	AGAP1	ATSACAPIS(0.225)S(0.775)PK	S368	23.9318	22.7303	23.1189	23.9226	23.4623	23.3309
I6LM39	Methyl-CpG-binding protein 2	MECP2	AETSEGSGSAPAVPEAS(0.182)AS(0.818)PK	S80	23.9888	23.5693	24.0835	25.2095	21.5301	23.7278
I6LM39	Methyl-CpG-binding protein 2	MECP2	MPFQT(0.151)S(0.847)PGGKAEGGGAT(0.001)TSTQVMVIK	S229	21.0195	22.1554	23.2932	23.178	23.304	23.629
I6LM39	Methyl-CpG-binding protein 2	MECP2	VLEKS(1)PGKLLVK	S216	24.7774	23.6269	23.8316	23.5471	24.605	23.9588
A0A087X1U6	Epiplakin	EPPK1	QVS(1)ASELHTSGILGPETLR	S2718	28.3603	21.3139	28.3397	25.8001	25.2968	24.812
H0YLG1	Proteasome activator complex subunit 2	PSME2	AKPCGVRLS(1)GEAR	S10	21.6176	26.4388	26.4444	26.7783	26.4269	26.2587
A0A087X211	Protein CIP2A	KIAA1524	INPETVNLS(1)I	S905	21.3627	20.6651	22.693	21.4023	19.8661	20.9568
E7ER32	MKL/myocardin-like protein 1	MKL1;mkl1	AGSCCLS(1)PGGR	S511	21.7074	22.1879	21.9843	23.1582	24.3617	23.561
E7ER32	MKL/myocardin-like protein 1	MKL1;mkl1	FGSTGS(0.01)T(0.99)PPVS(0.999)PTPSER	S454	26.6193	26.5896	26.5883	25.299	25.2205	25.9191
A0A087X2H1	E3 ubiquitin-protein ligase HECTD1	HECTD1	LSVSSLLAAGAPMSS(0.001)S(0.005)AS(0.961)VPNLS(0.023)S(0.009)R	S1537	23.178	21.3984	23.4113	23.4537	23.1767	23.6415
A0A087X2H1	E3 ubiquitin-protein ligase HECTD1	HECTD1	TNATNNMNLS(1)R	S1571	23.1158	21.2797	22.4613	24.5364	23.4385	22.7462
A0A088AWL3	Nuclear receptor corepressor 1	NCOR1	AQLS(1)PGIYDDTSAR	S1379	26.8489	26.7858	26.913	26.6199	26.5084	26.452
A0A088AWL3	Nuclear receptor corepressor 1	NCOR1	IWEREPAPLLSAQYET(0.008)LS(0.996)DS(0.996)DD	S2339	21.6622	22.7376	23.9238	24.4648	24.8292	24.6005
A0A088AWL3	Nuclear receptor corepressor 1	NCOR1	IWEREPAPLLSAQYET(0.008)LS(0.996)DS(0.996)DD	S2341	21.9759	22.7376	23.9238	24.4648	24.8292	24.6005
A0A088AWL3	Nuclear receptor corepressor 1	NCOR1	S(1)PGSISYLPSFFTK	S2088	24.7235	25.2258	23.2719	24.8514	23.8134	24.3224
A0A088AWL3	Nuclear receptor corepressor 1	NCOR1	SATLPYIKQEEFS(1)PR	S1018	22.8327	22.3935	22.4388	21.4798	22.6589	22.4174
B4DEP1	Adenylosuccinate lyase	ADSL	AAGGDHGS(1)PDSYRSPLASR	S9	27.5554	27.2961	27.4977	26.5375	27.3333	27.3654
A0A096LNZ0	Uncharacterized protein FLJ45252	AAK1	LGGAVPFAPPEVS(1)PEQAK	S217	23.9467	23.9861	23.7327	24.1727	24.3352	24.0412
C9JFE4	COP9 signalosome complex subunit 1	GPS1	NQIHVKS(1)PPR	S448	27.3487	23.1042	25.6578	25.5438	27.4235	21.3143
F8W7U3	WASH complex subunit FAM21C;WASH complex subunit FAM21A	FAM21C;FAM21A	AGNS(1)DS(1)EEDDANGRVELILEPK	S70	22.5442	22.8926	23.2132	21.4577	22.9619	21.2402
F8W7U3	WASH complex subunit FAM21C;WASH complex subunit FAM21A	FAM21C;FAM21A	AGNS(1)DS(1)EEDDANGRVELILEPK	S72	22.5442	22.8926	23.2132	22.0549	22.9619	21.372
F8W7U3	WASH complex subunit FAM21C;WASH complex subunit FAM21A	FAM21C;FAM21A	AVAS(1)PEATVSQTDENK	S410	23.9862	23.8369	24.1158	25.0449	21.5752	23.6693
F8W7U3	WASH complex subunit FAM21C;WASH complex subunit FAM21A	FAM21C;FAM21A	ETVSEAPPLLFS(1)DEEEKEAQLGVK	S640	23.5674	23.5207	23.2754	25.0637	24.5589	24.0324
F8W7U3	WASH complex subunit FAM21C;WASH complex subunit FAM21A;Putative WASH complex subunit FAM21	FAM21C;FAM21A;FAM21D	GPIAQWADGAIS(1)PNGHRPQLR	S987	25.0172	25.0579	24.5865	23.8747	24.498	23.1689
F8W7U3	WASH complex subunit FAM21C;WASH complex subunit FAM21A	FAM21C;FAM21A	LTDEDFS(1)PFGS(1)GGGLFSGGK	S264	22.614	23.8817	24.6947	25.0138	24.3484	23.3853
F8W7U3	WASH complex subunit FAM21C;WASH complex subunit FAM21A	FAM21C;FAM21A	T(0.012)PS(0.988)DDEEDNLFAPPK	S245	23.3006	23.2618	23.4113	24.329	23.863	23.4396
F5H0Q6	CLK4-associating serine/arginine rich protein	CLASRP	AHLDHIPDYT(0.001)PPLLT(0.039)T(0.089)IS(0.868)PEQES(0.003)DER	S101	22.8784	23.2621	23.126	23.7827	23.7442	20.4869
F5H0Q6	CLK4-associating serine/arginine rich protein	CLASRP	KIS(1)PPSYAR	S285	26.0894	25.3975	25.9775	26.0026	26.0627	26.1426
F5H0Q6	CLK4-associating serine/arginine rich protein	CLASRP	LTRPAAS(1)PAVGEK	S547	25.2348	25.8517	25.4387	25.6043	25.3328	25.236
F5H0Q6	CLK4-associating serine/arginine rich protein	CLASRP	S(0.007)S(0.008)WS(0.986)LS(0.928)PS(0.072)R	S499	22.106	22.2534	21.4533	21.789	20.8638	21.3217
F5H0Q6	CLK4-associating serine/arginine rich protein	CLASRP	S(0.007)S(0.008)WS(0.986)LS(0.928)PS(0.072)R	S501	22.106	22.2534	21.4533	21.789	20.643	20.5336
A0A0A0MQW1	Kinase suppressor of Ras 1	KSR1	RT(0.003)ES(0.997)VPSDINNPVDR	S329	26.6044	26.7704	26.5764	26.9791	26.6724	26.8224
A0A0A0MR02	Voltage-dependent anion-selective channel protein 2	VDAC2	LTFDTTFS(0.998)PNT(0.002)GKK	S115	26.0303	25.4097	25.3984	25.6299	25.6502	25.6909
A0A0J9YWJ4	RNA polymerase II subunit A C-terminal domain phosphatase	CTDP1	ENS(1)PAAFPDR	S672	22.9033	22.2094	22.9783	24.8156	22.1844	23.5065
Q5T092	Protein RER1	RER1	S(1)EGDSVGESVHGKPSVVYR	S2	24.6678	24.39	24.6711	24.4354	23.9931	24.5941
Q5T092	Protein RER1	RER1	SEGDS(1)VGESVHGKPSVVYR	S6	24.9565	25.0124	21.1217	25.9426	25.3864	25.7546
Q5T092	Protein RER1	RER1	VDPSLMEDS(1)DDGPSLPTK	S95	25.5777	25.9597	25.6511	25.7754	24.6243	25.2592
A0A0A0MR08	Ubiquitin carboxyl-terminal hydrolase	USP19	CQENGQELS(1)PIALEPGPEPHR	S210	24.536	24.2293	24.2617	21.9266	22.9648	22.8287
A0A0A0MR27	Coiled-coil domain-containing protein 14	CCDC14	S(1)LLNIHDK	S581	21.8189	21.3729	21.4943	22.5927	21.024	21.2508
F5H3Q7	RPA-interacting protein	RPAIN	AESLRS(1)PR	S7	26.519	26.1019	26.0771	26.1609	26.2555	25.6486
F5H3Q7	RPA-interacting protein	RPAIN	LVGS(1)PPWKEAFR	S18	22.125	21.401	22.3013	23.0652	21.9976	22.1796
A0A0A0MRB5	MAP kinase-activating death domain protein	MADD	GT(0.01)LS(0.99)DSEIETNSATSTIFGK	S1201	26.0417	25.7665	25.5	26.5029	26.4924	22.1413
A0A0A0MRB5	MAP kinase-activating death domain protein	MADD	LAS(0.026)DS(0.947)DAES(0.019)DS(0.008)R	S820	21.6766	23.3305	21.9997	22.7477	22.7767	22.0656
A0A0A0MRB7	Transcription factor E2-alpha	TCF3	AGAPGALS(0.986)PS(0.014)YDGGLHGLQSK	S328	28.6767	28.3069	28.2064	28.7534	28.7995	28.7731
A0A0A0MRB7	Transcription factor E2-alpha	TCF3	ALASIY(0.001)S(0.001)PDHS(0.001)S(0.003)NNFS(0.008)S(0.008)S(0.022)PS(0.221)T(0.757)PVGS(0.966)PQGLAGT(0.009)S(0.003)QWPR	S308	24.0173	23.3523	24.8611	25.0175	25.503	21.0685
A0A0A0MRB7		TCF3	TSS(0.993)T(0.006)DEVLSLEEK	S479	25.9376	25.18	25.9002	27.4535	25.9871	23.5355
A0A0A0MRB7	Transcription factor E2-alpha	TCF3	DAGVGGLTQAGFLSGELALNS(0.007)PGPLS(0.924)PS(0.069)GMK	S88	25.0075	21.8714	21.8223	24.1746	24.8324	24.5653
A0A0A0MSK4	G-protein-signaling modulator 1	GPSM1	EGS(0.019)HS(0.981)PLDSADVR	S471	22.407	23.0453	21.3182	22.1535	22.0702	22.0671
A0A0A0MSC0	Potassium voltage-gated channel subfamily KQT member 5	KCNQ5	SLS(1)VQNLIR	S822	22.4153	20.8221	21.0813	22.5141	22.8975	22.5622
A0A0A0MSC0	Potassium voltage-gated channel subfamily KQT member 5;Potassium voltage-gated channel subfamily KQT member 4	KCNQ5;KCNQ4	SWS(1)FNDR	S457	21.0723	21.3351	21.216	21.952	22.1265	21.2894
H0YBF7	Arf-GAP with SH3 domain, ANK repeat and PH domain-containing protein 1	ASAP1	T(0.015)LS(0.985)DPPS(1)PLPHGPPNK	S664	24.037	23.1131	22.8085	23.6574	22.6314	23.9444
A0A0A0MRF4	39S ribosomal protein L19, mitochondrial	MRPL19	FLS(1)PEFIPR	S77	20.7536	22.0463	19.6939	22.0064	22.0304	20.3653
Q5JTU8	CDK5 regulatory subunit-associated protein 2	CDK5RAP2	DLS(1)PPRYDSLVQSQAR	S248	24.2083	24.7382	23.4219	24.2147	24.4852	24.3664
A0A0A0MRH8	Chromodomain-helicase-DNA-binding protein 1-like	CHD1L	VLS(1)PEELEDR	S355	22.9687	22.7616	22.833	21.4819	23.3081	21.6851
A0A0A0MRI1	GPALPP motifs-containing protein 1	GPALPP1	QDDS(1)PPRPIIGPALPPGFIK	S103	25.5188	25.5274	25.8744	25.9606	25.613	26.1826
H0Y7V8	Non-specific serine/threonine protein kinase;Serine/threonine-protein kinase MRCK alpha	CDC42BPA	EFS(0.998)GGS(0.833)Y(0.051)S(0.118)AK	S903	25.8064	25.6633	25.3459	24.2464	23.5129	24.1752
H0Y7V8	Non-specific serine/threonine protein kinase;Serine/threonine-protein kinase MRCK alpha	CDC42BPA	EFS(0.997)GGS(0.851)Y(0.011)S(0.14)AK	S906	24.3258	25.1589	24.8638	22.9286	24.5463	23.0231
H0Y7V8	Non-specific serine/threonine protein kinase;Serine/threonine-protein kinase MRCK alpha	CDC42BPA	RYS(1)FRVPEEER	S735	24.7803	24.0434	24.1583	22.9462	23.3365	23.1617
H0Y7V8	Non-specific serine/threonine protein kinase;Serine/threonine-protein kinase MRCK alpha	CDC42BPA	S(0.822)LS(0.178)LESTDR	S971	20.9249	20.9291	22.2786	23.5897	21.9394	22.4405
H0Y7V8	Non-specific serine/threonine protein kinase;Serine/threonine-protein kinase MRCK alpha	CDC42BPA	SLS(0.999)LES(0.001)TDR	S973	23.3855	23.294	23.5701	24.6468	24.3282	23.9981
H0Y7V8	Non-specific serine/threonine protein kinase;Serine/threonine-protein kinase MRCK alpha	CDC42BPA	S(0.005)LS(0.995)LES(0.821)T(0.174)DRGS(0.005)WDP	S976	23.3855	23.294	23.5701	24.1148	24.3282	23.9981
H0Y7V8	Non-specific serine/threonine protein kinase;Serine/threonine-protein kinase MRCK alpha	CDC42BPA	SMS(1)ASSGLSAR	S881	24.1568	24.0578	24.0575	23.9933	24.4542	24.4362
J3QSX6	Actin-binding LIM protein 1	ABLIM1	T(0.001)AS(0.999)LPGYGR	S278	22.8727	21.8779	23.0835	23.3362	23.2503	22.8174
A0A0A0MRM2	Nebulin-related-anchoring protein	NRAP	DVQGDS(0.968)QMS(0.011)HS(0.011)LQMS(0.011)K	S843	27.4185	21.576	27.4188	28.7714	27.3002	27.52
A0A0A0MRM9	Nucleolar and coiled-body phosphoprotein 1	NOLC1	AAVVVS(0.049)KS(0.975)GS(0.976)LKK	S589	25.4642	25.8351	25.8193	25.218	24.6669	24.9081
A0A0A0MRM9	Nucleolar and coiled-body phosphoprotein 1	NOLC1	AAVVVS(0.049)KS(0.975)GS(0.976)LKK	S591	25.4642	25.5055	25.5129	25.218	24.0395	24.3425
A0A0A0MRM9	Nucleolar and coiled-body phosphoprotein 1	NOLC1	AS(0.007)S(0.993)PFRR	S632	27.8118	26.4408	21.4109	26.3406	27.2982	26.3425
A0A0A0MRM9	Nucleolar and coiled-body phosphoprotein 1	NOLC1	GGSISVQVNSIKFDS(1)E	S707	28.8537	28.8923	28.8747	28.2747	29.29	28.6259
A0A0A0MRM9	Nucleolar and coiled-body phosphoprotein 1	NOLC1	GKGS(1)PRPQAPK	S547	29.3612	29.1504	29.3136	28.946	29.3132	29.5273
A0A0A0MRM9	Nucleolar and coiled-body phosphoprotein 1	NOLC1	VADNS(1)FDAKR	S652	27.4549	27.5743	27.2928	28.0145	28.0511	28.3712
A0A0A0MRN5	Opioid growth factor receptor	OGFR	KVDEGAGDSAAVASGGAQTLALAGS(0.948)PAPS(0.052)GHPK	S432	21.2702	24.335	24.0328	25.1809	23.7479	24.712
A0A0A0MRN5	Opioid growth factor receptor	OGFR	KVEEEGS(1)PGDPDHEASTQGR	S263	26.4295	26.5044	26.5163	26.0715	21.6586	25.713
A0A0A0MRN5	Opioid growth factor receptor	OGFR	SQGDEAGGHGEDRPEPLS(1)PK	S326	27.0389	26.2693	27.0915	27.3016	26.8776	27.004
A0A0A0MRN5	Opioid growth factor receptor	OGFR	S(1)VEPQDAGPLER	S297	25.1843	25.0122	25.1214	25.6765	21.1967	25.5951
A0A0A0MRP0	MAP7 domain-containing protein 3	MAP7D3	S(0.001)AS(0.977)T(0.022)EKLEQGTSALIR	S185	25.7444	25.2218	25.0481	24.4915	24.2484	24.0307
A0A0A0MRP0	MAP7 domain-containing protein 3	MAP7D3	TSLEAS(0.001)MEAS(0.999)PK	S420	23.5853	23.3782	23.5577	24.4984	23.9438	23.968
A0A0A0MRP6	Probable global transcription activator SNF2L1	SMARCA1	SPT(0.008)S(0.992)PLNMK	S119	23.7879	23.1589	21.3689	23.6676	23.268	23.3776
A0A0A0MRR7	U1 small nuclear ribonucleoprotein C	SNRPC	FYCDYCDTYLTHDS(0.937)PS(0.063)VR	S38	26.9629	26.1569	26.5323	25.5298	25.6539	26.101
H7C163	Ankyrin repeat and SAM domain-containing protein 6	ANKS6	S(0.015)T(0.015)S(0.923)PT(0.045)LT(0.001)PSPSPK	S204	23.9831	24.0993	23.8814	21.2665	23.8333	24.1933
A0A0A0MRT2	WW domain-containing adapter protein with coiled-coil	WAC	DAGDPS(1)PPNK	S8	24.4258	23.9306	24.3741	24.0774	23.9343	23.8727
A0A0A0MRT2	WW domain-containing adapter protein with coiled-coil	WAC	QQGHEPVS(1)PR	S359	26.9962	27.9784	28.2164	28.7987	27.6854	28.3145
B6VEX4	Abl interactor 1	ABI1	T(0.002)AS(0.998)LNQRPR	S231	25.5639	24.9725	25.2383	23.8486	24.5358	21.5137
B6VEX4	Abl interactor 1	ABI1	TNPPTQKPPS(0.996)PPMS(0.004)GR	S183	25.3158	25.8423	25.2546	25.0002	25.1327	25.5869
A0A0A0MRW6	Nucleolar protein 6	NOL6	EVQS(1)PEGMISLR	S811	21.4151	24.6497	25.1356	24.2291	24.0878	23.9802
A0A0A0MRW6	Nucleolar protein 6	NOL6	GQSPAGDGS(1)PEPPTPR	S289	24.6068	24.7998	24.9385	24.8682	24.5984	24.3678
H0YC17	TNFAIP3-interacting protein 1	TNIP1	YLQDQLS(1)PLTR	S16	24.4912	24.4881	24.0211	24.6416	24.6632	24.1347
A0A0A0MS29		MFF	NDS(0.998)LVT(0.001)PS(0.001)PQQAR	S96	24.1717	20.1405	23.8004	24.1063	24.0012	23.7159
A0A0A0MS59	Helicase SRCAP	SRCAP	AGAPVGGS(1)PGLAKR	S2889	23.9355	22.8814	23.4838	23.1641	23.8248	23.2382
A0A0A0MS59	Helicase SRCAP	SRCAP	DEEQSEADAGS(0.991)GPPT(0.984)PGPT(0.019)T(0.006)LGPK	S371	24.3845	24.2551	24.2831	24.1617	23.2258	21.2643
A0A0A0MS59	Helicase SRCAP	SRCAP	S(0.075)T(0.097)T(0.415)T(0.414)PPRCS(0.999)PAR	S2171	24.6381	24.8376	24.916	24.6533	24.756	24.4209
G3V578	Protein NDRG2	NDRG2	TAS(1)LTSAASVDGNR	S245	28.6424	28.1964	28.152	26.8832	27.2902	26.9064
K7EPZ6	Methyl-CpG-binding domain protein 1	MBD1	RRPGAQPLPPPPPS(0.003)QS(0.997)PEPTEPHPR	S198	25.3869	25.8819	24.846	24.6789	21.1138	25.2765
A0A0A0MS99	Multidrug resistance-associated protein 1	ABCC1	QLS(0.836)S(0.185)S(0.649)S(0.509)S(0.486)Y(0.256)S(0.078)GDIS(0.002)R	S599	23.7676	23.7994	23.9578	22.0446	23.4193	21.5228
A0A0A0MS99	Multidrug resistance-associated protein 1	ABCC1	QLSS(0.003)S(0.005)S(0.054)S(0.883)YS(0.054)GDIS(0.001)R	S603	22.7901	22.0787	21.5933	23.9827	23.7585	23.4024
A0A0A0MSA7	Eukaryotic translation initiation factor 4 gamma 3	EIF4G3	RS(1)PVPAQIAITVPK	S494	23.1203	22.9225	22.7174	23.6059	23.5205	23.5592
A0A0A0MSG0	WAS/WASL-interacting protein family member 3	WIPF3	TISGPLIPPAS(1)PR	S149	24.8374	24.3802	24.339	25.6199	25.6774	25.2115
B3KPJ4	Polyhomeotic-like protein 2	PHC2	CSDNSSYEEPLS(0.983)PIS(0.016)AS(0.001)SSTSR	S357	23.6055	23.3926	23.5534	23.1662	23.2873	22.9223
A0A0A0MSK5	Torsin-1A-interacting protein 1	TOR1AIP1	GLRDS(1)HS(1)S(1)EEDEASSQTDLSQTISKK	S33	24.0092	23.4278	25.008	23.7942	24.2115	23.9285
A0A0A0MSK5	Torsin-1A-interacting protein 1	TOR1AIP1	GLRDS(1)HS(1)S(1)EEDEASSQTDLSQTISKK	S35	27.9784	27.7698	27.9414	28.4019	27.9877	27.6888
A0A0A0MSK5	Torsin-1A-interacting protein 1	TOR1AIP1	DSHS(1)S(1)EEDEASSQTDLSQTISKK	S36	27.9784	27.7698	27.9414	28.4019	27.9877	27.6888
A0A0A0MSK5	Torsin-1A-interacting protein 1	TOR1AIP1	LQQQHSEQPPLQPS(0.981)PVMT(0.019)R	S22	26.946	25.8889	26.83	27.4106	27.0633	26.7693
A0A0A0MSK5	Torsin-1A-interacting protein 1	TOR1AIP1	MQNDSILKSELGNQS(0.988)PS(0.009)T(0.002)S(0.001)S(0.001)R	S194	25.4771	25.1013	25.4973	22.0431	24.6464	24.2113
A0A0A0MSK5	Torsin-1A-interacting protein 1	TOR1AIP1	VNFS(1)EEGETEEDDQDSSHSSVTTVK	S94	25.4913	25.1753	25.3755	26.4479	26.3567	20.5815
A0A0J9YYG8	Disks large homolog 5	DLG5	LGS(0.996)S(0.004)SNLQFK	S282	23.1499	22.9492	22.9188	23.2031	23.3014	23.0289
A0A0A0MSQ9	Vacuolar fusion protein MON1 homolog A	MON1A	S(1)YEDLTESEDGAASGDSHK	S64	23.9431	23.7858	23.8792	24.7839	23.8914	23.5485
A0A0A0MSU2	ELM2 and SANT domain-containing protein 1	ELMSAN1	RRAS(1)QEANLLTLAQK	S461	24.2125	24.3178	24.1128	24.6164	24.7955	24.6272
A0A0A0MSU2	ELM2 and SANT domain-containing protein 1	ELMSAN1	T(0.119)NS(0.881)AEVT(1)PPVLSVMGEAT(0.991)PVS(0.009)IEPR	S700	26.2848	25.4699	26.3818	26.1438	25.1782	25.9853
A0A0A0MSU3	RecQ-mediated genome instability protein 1	RMI1	QS(0.153)S(0.847)FEPEFVIS(1)PRPK	S292	23.5529	23.3366	23.6496	21.7133	23.1541	21.9304
Q5TCC6	Isoleucine--tRNA ligase, cytoplasmic	IARS	APLKPYPVS(0.996)PS(0.004)DKVLIQEK	S100	23.5854	23.7298	24.0322	25.2399	23.5512	23.6025
A0A0A0MSZ1	MAP/microtubule affinity-regulating kinase 3	MARK3	GIAPAS(1)PMLGNASNPNKADIPER	S492	24.7187	25.1069	24.7025	26.7818	21.0444	26.1817
A0A0A0MSZ1	MAP/microtubule affinity-regulating kinase 3	MARK3	KSSELDAS(0.001)DS(0.176)S(0.207)S(0.244)S(0.288)S(0.108)NLS(0.975)LAK	S406	23.4359	23.3088	23.5785	23.6928	22.2484	23.572
A0A0A0MSZ1	MAP/microtubule affinity-regulating kinase 3	MARK3	S(0.003)RGS(0.93)T(0.068)NLFSK	S624	24.7963	24.7825	24.8356	24.6892	24.7415	24.5318
A0A0A0MSZ1	MAP/microtubule affinity-regulating kinase 3	MARK3	TPVAS(0.942)T(0.058)HS(0.98)IS(0.016)S(0.004)AATPDR	S563	24.9611	24.7513	25.4597	26.4066	25.7359	25.3076
A0A0A0MSZ1	MAP/microtubule affinity-regulating kinase 3	MARK3	TPVAS(0.942)T(0.058)HS(0.98)IS(0.016)S(0.004)AATPDR	S566	24.1939	24.0879	24.5238	25.7176	25.1959	24.5895
A0A0A0MT33	Protein SCAF8	SCAF8	SSEPVKETVQTTQS(0.999)PTPVEK	S695	26.7304	26.4664	26.0563	21.2987	27.4411	26.9702
A0A0A0MT38	Dedicator of cytokinesis protein 9	DOCK9	AEPY(0.001)VAS(0.997)EY(0.002)K	S927	22.3856	22.1446	21.9352	23.0236	21.9039	22.3966
Q9HBD4	Transcription activator BRG1	SMARCA4	KAENAEGQTPAIGPDGEPLDET(0.097)S(0.905)QMS(0.998)DLPVK	S610	21.992	25.5869	25.9178	26.0317	25.2475	23.8055
Q9HBD4	Transcription activator BRG1	SMARCA4	KAENAEGQTPAIGPDGEPLDET(0.097)S(0.905)QMS(0.998)DLPVK	S613	25.285	25.5908	25.7167	25.1205	24.9217	24.4824
Q9HBD4	Transcription activator BRG1	SMARCA4	EVDYSDS(0.997)LT(0.003)EKQWLK	S1382	26.672	26.0099	26.6847	28.1986	27.3168	27.0425
Q9HBD4	Transcription activator BRG1	SMARCA4	GRPPAEKLS(1)PNPPNLTK	S1484	27.0673	26.6267	27.3273	27.1911	26.8436	27.4228
Q9HBD4	Transcription activator BRG1	SMARCA4	KIPDPDS(1)DDVS(1)EVDAR	S695	26.1903	25.9723	26.0751	26.7221	26.5303	26.6081
Q9HBD4	Transcription activator BRG1	SMARCA4	KIPDPDS(1)DDVS(1)EVDAR	S699	23.834	24.467	24.911	25.6532	25.5998	25.2394
A0A0A0MT60	Peptidyl-prolyl cis-trans isomerase;FK506-binding protein 15	FKBP15	DS(0.004)AAPS(0.991)PIPGADNLS(0.006)ADPVVSPPTSIPFK	S336	25.1062	25.3447	24.5241	26.2299	25.8898	25.4511
A0A0A0MT60	Peptidyl-prolyl cis-trans isomerase;FK506-binding protein 15	FKBP15	LSLTSDPEEGDPLALGPES(1)PGEPQPPQLK	S1139	25.9714	26.1973	24.8774	25.942	24.8834	23.5588
A0A0A0MT60	Peptidyl-prolyl cis-trans isomerase;FK506-binding protein 15	FKBP15	RPS(1)QEQSASASSGQPQAPLNR	S981	26.8391	20.5854	26.4367	27.0919	26.6599	26.0891
A0A0A0MT60	Peptidyl-prolyl cis-trans isomerase;FK506-binding protein 15	FKBP15	SNSLSEQLAINT(0.136)S(0.864)PDAVK	S381	23.886	23.4611	23.3786	23.3998	21.4251	22.2472
A0A0A0MT60	Peptidyl-prolyl cis-trans isomerase;FK506-binding protein 15	FKBP15	SSLS(1)GDEEDELFK	S1189	26.7234	26.5177	26.5798	28.0238	26.946	27.158
C9JUH3	Cerebral cavernous malformations 2 protein	CCM2	GIITDS(1)FGR	S287	24.9281	23.9589	24.8845	25.1825	23.9904	25.1421
A0A0A0MTR7	E3 ubiquitin-protein ligase RNF213	RNF213	EDQEAAELLS(1)EPEEESER	S1258	25.7606	25.321	25.0905	25.5002	25.8125	26.0471
H0YBY0	Double-stranded RNA-binding protein Staufen homolog 2	STAU2	DMNQPSSSFFS(0.008)IS(0.935)PT(0.045)S(0.01)NS(0.001)SATIAR	S68	24.1257	23.4819	24.9997	24.6308	23.6659	23.3719
H0YBY0	Double-stranded RNA-binding protein Staufen homolog 2	STAU2	GILHLS(1)PDVYQEMEASR	S29	24.3985	24.472	24.3224	23.4043	23.7461	23.205
H0YBY0	Double-stranded RNA-binding protein Staufen homolog 2	STAU2	GS(0.191)S(0.818)PT(0.991)PPCS(1)PVQPSK	S99	24.3762	24.6532	24.9281	25.4875	24.2196	23.7704
H0YBY0	Double-stranded RNA-binding protein Staufen homolog 2	STAU2	GSS(0.041)PT(0.958)PPCS(1)PVQPSK	S105	26.3852	26.191	26.4783	27.2374	26.2127	26.2854
H0YBY0	Double-stranded RNA-binding protein Staufen homolog 2	STAU2	VISGTTLGYLS(1)PK	S53	24.148	23.5901	23.4481	24.8614	24.1037	24.0599
A0A0A0MTG6	Sterol regulatory element-binding protein cleavage-activating protein	SCAP	AGPEEPGDS(1)PPLR	S477	25.2463	24.8255	24.6713	26.1272	25.2798	25.0423
A0A0A0MTG6	Sterol regulatory element-binding protein cleavage-activating protein	SCAP	RDS(0.998)GVGS(0.002)GLEAQES(0.051)WERLS(0.948)DGGK	S448	23.7916	24.3712	23.3851	24.8901	20.9798	21.4796
U3KQI1	Peptidyl-prolyl cis-trans isomerase FKBP8	FKBP8	S(0.095)CS(0.905)LVLEHQPDNIK	S17	24.0741	23.9718	23.7626	22.7186	22.4545	21.3179
D6RF40	S-phase kinase-associated protein 2	SKP2	TSELLSGMGVSALEKEEPDSENIPQELLS(0.015)NLGHPES(0.985)PPR	S64	25.5699	24.3884	26.1957	26.5754	26.2364	26.0036
A0A0A0MTQ1	Centrosomal protein of 95 kDa	CEP95	LQLASFQYSKS(0.001)PS(0.999)L	S755	23.6633	23.0686	23.0217	22.8408	23.5854	23.7192
A0A0A0MTQ1	Centrosomal protein of 95 kDa	CEP95	SHS(1)LS(0.977)PS(0.023)PVNK	S384	24.1089	23.8411	24.7628	22.8451	25.2999	24.8418
A0A0A0MTQ1	Centrosomal protein of 95 kDa	CEP95	S(0.168)HS(0.835)LS(0.998)PS(1)PVNK	S386	24.1089	23.8411	24.7628	22.8451	25.2999	24.8418
H0YNL8		IREB2	AGKLS(1)PLKVQPK	S157	26.2043	25.4638	25.9613	26.2506	25.9611	25.1598
A0A0A6YYC7	E3 ubiquitin-protein ligase ZFP91	ZFP91-CNTF;ZFP91	RS(0.134)S(0.865)PS(0.001)ARPPDVPGQQPQAAK	S83	25.7114	25.0653	25.6471	26.3523	26.6473	24.6947
A8MV53	Suppressor of SWI4 1 homolog	PPAN;PPAN-P2RY11	VGGS(1)DEEASGIPSR	S306	28.2465	27.9378	27.3466	27.9254	27.898	27.9259
A8MV53	Suppressor of SWI4 1 homolog	PPAN;PPAN-P2RY11	LQDISELLATGAGLS(1)ES(1)EAEPDGDHNITELPQAVAGR	S185	29.2085	29.9911	29.9387	29.6657	29.7228	29.2412
A8MV53	Suppressor of SWI4 1 homolog	PPAN;PPAN-P2RY11	LQDISELLATGAGLS(1)ES(1)EAEPDGDHNITELPQAVAGR	S187	29.0361	29.8658	29.9387	29.6117	29.7228	29.1558
A0A286YES6	Uncharacterized protein KIAA0754	MACF1;KIAA0754	NLS(1)GDCQDFR	S213	25.0438	24.8216	25.1626	23.9396	23.235	23.9709
A0A0A6YYL0	Homeobox protein TGIF2	TGIF2-C20orf24;TGIF2	S(1)DS(1)DLGEDEGLLSLAGKR	S2	22.0427	23.5726	23.6018	24.0121	24.2357	24.3752
A0A0A6YYL0	Homeobox protein TGIF2	TGIF2-C20orf24;TGIF2	S(1)DS(1)DLGEDEGLLSLAGKR	S4	21.9061	23.5726	23.6018	24.0121	24.2357	24.3752
I3L167	Coronin;Coronin-7	CORO7-PAM16;CORO7	RES(0.999)WIS(0.001)DIR	S21	23.6693	22.7112	23.2771	22.3094	21.3729	21.3143
A0A0B4J1R7	UPF0693 protein C10orf32	C10orf32-ASMT;C10orf32	S(0.851)S(0.149)ELLGQAAR	S45	21.3452	21.2735	22.1163	23.1289	22.9261	22.9752
A0A0B4J1S8	Phosphatidylinositol 4-kinase beta	PI4KB	RLS(1)EQLAHTPTAFK	S523	24.8356	24.1507	24.2676	24.9776	25.0146	24.3004
A0A0B4J1S8	Phosphatidylinositol 4-kinase beta	PI4KB	S(1)VENLPECGITHEQR	S440	24.5193	24.4855	24.0696	26.5861	25.8026	25.9322
H0YEG1	Mediator of RNA polymerase II transcription subunit 24	MED24	LLS(1)SNEDDANILSS(0.99)PT(0.01)DR	S38	27.7608	28.0198	27.9508	26.8938	26.7674	24.7832
H0YEG1	Mediator of RNA polymerase II transcription subunit 24	MED24	LLS(1)SNEDDANILSS(0.99)PT(0.01)DR	S49	27.0008	27.3505	27.3382	27.851	27.7818	27.16
A0A0B4J1W3	N-alpha-acetyltransferase 15, NatA auxiliary subunit	NAA15	IT(0.001)VNGDS(1)S(0.999)AEAEELANEI	S854	24.1086	24.6681	24.942	26.0433	25.2227	25.3112
A0A0B4J1W3	N-alpha-acetyltransferase 15, NatA auxiliary subunit	NAA15	IT(0.001)VNGDS(1)S(0.999)AEAEELANEI	S855	24.1086	24.6681	25.811	27.3333	25.2227	25.3112
A0A0B4J1Z1		SRSF7	FLRLS(1)QS(1)P	S134	27.2599	27.0172	26.9047	27.0293	27.4611	27.6095
A0A0B4J1Z1		SRSF7	FLRLS(1)QS(1)P	S136	27.2599	27.0172	26.9047	27.0293	27.4611	27.6095
A0A0B4J220		C11orf98	APQDVEMKDLEDES(1)	S123	24.1957	23.5083	23.9431	23.4548	23.6923	23.5118
E7EUL6	MDS1 and EVI1 complex locus protein EVI1	MECOM	NFIGNSNHGS(0.004)QS(0.996)PR	S851	25.0261	24.3226	24.5107	24.338	24.5764	23.773
A0A0C3SFZ9	F-BAR domain only protein 1	FCHO1	APACS(1)PEAAAAQLR	S372	24.9929	24.9454	25.1443	25.5283	25.0298	25.1509
A0A0C3SFZ9	F-BAR domain only protein 1	FCHO1	APPLPDS(0.95)PQPLAS(0.01)S(0.04)PGPWGLEALAGGDLMPAPADPTAR	S523	23.4742	23.2019	23.2726	21.7502	22.4768	22.5801
A0A0C4DFM2	Zinc finger protein 574	ZNF574	APVAS(1)PAALGS(0.005)T(0.003)AT(0.027)AS(0.965)PAAPAR	S807	23.4595	23.2593	22.6928	22.5352	22.5195	22.1659
X6R5G7	Terminal uridylyltransferase 4	ZCCHC11	CALQNS(1)PR	S209	24.3454	24.2269	23.7934	24.1235	24.1963	21.5124
C9JKQ0	N-lysine methyltransferase SETD8	SETD8	IYS(0.004)Y(0.004)MS(0.992)PNK	S50	22.4711	21.6613	22.2008	23.2411	22.7832	22.148
A0A0C4DFS6	Protein sprouty homolog 4	SPRY4	LLDHMAPPPVADQAS(1)PR	S148	23.0409	23.1308	21.3175	23.4041	23.3411	23.2136
E7EQD7	Disks large homolog 1	DLG1	EQMMNSSISSGS(0.05)GS(0.95)LR	S575	25.1191	23.7195	24.8041	24.4982	21.8057	21.0943
G3XAC1	Solute carrier family 26 member 6	SLC26A6	PVPDS(1)PVS(0.965)VT(0.035)RL	S644	24.2322	24.2166	23.9237	24.5939	23.9417	23.5543
G3XAC1	Solute carrier family 26 member 6	SLC26A6	PVPDS(1)PVS(0.965)VT(0.035)RL	S647	22.7334	23.4404	23.0441	23.9823	23.4312	22.3768
H0Y3X6	Negative elongation factor A	NELFA	EASRPPEEPSAPS(0.982)PT(0.018)LPAQFK	S367	23.8031	23.7928	24.4536	24.1483	24.5367	24.0115
H0Y3X6	Negative elongation factor A	NELFA	SPTAPS(0.002)VFS(0.828)PT(0.17)GNR	S237	24.574	24.4136	24.6149	23.8674	22.9024	21.592
G5E9D9	Uncharacterized protein C14orf93	C14orf93	QLS(1)PATQLAIQR	S44	24.1552	23.1242	23.5951	23.5679	23.871	23.6156
A0A0C4DG02	DNA (cytosine-5)-methyltransferase 3B;DNA (cytosine-5)-methyltransferase 3A	DNMT3A;DNMT3B	SWS(1)VPVIR	S671	20.9272	21.6039	21.1211	22.0046	21.7325	20.4106
A0A0C4DG07	Nibrin	NBN	IPNYQLS(0.998)PT(0.002)KLPSINK	S350	27.9853	27.2111	27.2087	27.4575	27.4437	27.8069
A0A0C4DG07	Nibrin	NBN	MLS(1)QDAPTVK	S315	22.6972	22.8466	23.8452	23.9109	23.6212	23.4496
A0A0C4DG33	Peroxisome biogenesis factor 1	PEX1	SQS(1)GEDESMNQPGPIK	S1154	25.581	25.8042	26.013	26.5099	25.9233	25.6927
A0A0C4DG89	Probable ATP-dependent RNA helicase DDX46	DDX46	AALGLQDS(1)DDEDAAVDIDEQIESMFNSK	S804	28.0848	28.4988	28.2814	28.4917	27.8413	28.7007
A0A0C4DG89	Probable ATP-dependent RNA helicase DDX46	DDX46	KGELMENDQDAMEY(0.363)S(0.806)S(0.806)EEEEVDLQT(0.022)ALT(0.002)GY(0.001)QTK	S295	22.9225	23.2432	22.7209	20.6326	22.017	21.1958
A0A0C4DG89	Probable ATP-dependent RNA helicase DDX46	DDX46	KGELMENDQDAMEY(0.363)S(0.806)S(0.806)EEEEVDLQT(0.022)ALT(0.002)GY(0.001)QTK	S296	22.9225	23.2432	22.7209	22.4502	21.2046	21.1017
A0A0C4DG98	THO complex subunit 2	THOC2	T(0.001)PVS(0.1)GS(0.864)LKS(0.036)PVPR	S1275	21.699	23.4432	21.8046	22.2979	23.2262	23.2654
A0A0C4DG98	THO complex subunit 2	THOC2	TPVSGSLKS(1)PVPR	S1278	26.9357	25.9469	26.7434	27.2316	25.9973	26.1625
A0A0C4DG98	THO complex subunit 2	THOC2	KIDT(0.008)HPS(0.967)PS(0.02)HS(0.004)S(0.001)TVKDSLIELK	S1302	23.8867	24.0232	24.1045	23.9464	24.729	24.1559
H0YA91	Calpastatin	CAST	EGITGPPADSSKPIGPDDAIDALSSDFT(0.009)CGS(0.972)PT(0.018)AAGK	S260	23.7031	24.5555	23.2727	24.2792	23.3936	22.8896
A0A0C4DGF8	Histone-lysine N-methyltransferase EHMT1	EHMT1	T(0.004)DS(0.996)PWIKPAR	S54	23.2942	23.0403	22.6193	22.5769	22.15	22.2926
A0A0C4DGF9	Phosphatidylinositol 4-phosphate 3-kinase C2 domain-containing subunit alpha	PIK3C2A	SLS(1)VATVTR	S329	23.4488	23.011	22.9671	22.0757	21.7022	21.3388
A0A0C4DGF9	Phosphatidylinositol 4-phosphate 3-kinase C2 domain-containing subunit alpha	PIK3C2A	SQS(1)LNIR	S338	26.6595	26.5125	26.5417	26.3756	26.3497	26.3358
A0A0C4DGF9	Phosphatidylinositol 4-phosphate 3-kinase C2 domain-containing subunit alpha	PIK3C2A	VSNLQVS(1)PK	S259	25.9363	25.7473	25.4101	25.3903	25.4945	25.2749
A0A0C4DGG1	Protein kinase C and casein kinase substrate in neurons protein 3	PACSIN3	DGTAPPPQSPGSPGTGQDEEWS(0.998)DEES(0.002)PR	S354	24.9364	24.924	25.0614	25.3477	25.4865	24.8943
A0A0C4DGG1	Protein kinase C and casein kinase substrate in neurons protein 3	PACSIN3	DLHQGIEAAS(1)DEEDLR	S276	23.621	23.4736	23.1286	23.7951	23.6361	23.6135
A0A0C4DGG1	Protein kinase C and casein kinase substrate in neurons protein 3	PACSIN3	GGRS(0.999)PDEVT(0.001)LTSIVPTR	S319	24.06	23.1264	23.1502	22.9347	22.5839	20.6901
A0A0C4DGG3	Lysine-specific demethylase 2B	KDM2B	HQLGPS(0.046)LRS(0.954)PPR	S386	21.711	24.3992	24.7361	23.7831	23.9453	24.6301
A0A0C4DGG3	Lysine-specific demethylase 2B	KDM2B	S(0.047)S(0.047)S(0.897)PT(0.008)AGPSTEGAEGPEEK	S282	24.6588	23.9071	24.4694	24.8864	24.4404	24.0512
F5GWX5	Chromodomain-helicase-DNA-binding protein 4	CHD4	EIIKQEES(1)VDPDYWEK	S1301	26.0078	26.0144	26.0954	26.6129	26.2342	25.0704
F5GWX5	Chromodomain-helicase-DNA-binding protein 4	CHD4	LGGFGS(1)KR	S296	22.8326	22.8587	23.2933	21.494	21.2105	21.4408
F5GWX5	Chromodomain-helicase-DNA-binding protein 4	CHD4	WS(0.001)MPELAEVEENKKMS(0.977)QPGS(0.83)PS(0.192)PK	S1524	23.3504	20.8854	23.6378	23.0092	23.8659	21.9743
F5GWX5	Chromodomain-helicase-DNA-binding protein 4	CHD4	MSQPGS(0.954)PS(0.046)PK	S1528	24.8591	24.4927	24.8092	24.4033	25.0674	24.3891
F5GWX5	Chromodomain-helicase-DNA-binding protein 4	CHD4	WGQPPS(0.955)PT(0.044)PVPRPPDADPNTPSPK	S508	25.2023	22.1323	20.8837	26.0846	24.9395	25.0525
H0YK02	Tetratricopeptide repeat protein 7B	TTC7B	VEQALSEVAS(0.994)S(0.995)LQS(0.008)S(0.004)APK	S86	21.6979	23.0441	23.3377	24.673	24.1098	23.997
H0YK02	Tetratricopeptide repeat protein 7B	TTC7B	VEQALSEVAS(0.994)S(0.995)LQS(0.008)S(0.004)APK	S87	21.2879	23.0441	23.3377	24.673	24.1098	23.997
A0A0C4DGP2	Kinesin-like protein;Kinesin-like protein KIF18B	KIF18B	LQVYEGGGQPPPQDLPGS(1)PK	S404	24.4509	23.337	24.027	23.8477	23.695	23.7476
A0A0C4DGP2	Kinesin-like protein;Kinesin-like protein KIF18B	KIF18B	RGS(0.982)LPDT(0.018)QPSQGPSTPKGER	S674	21.492	21.8066	24.3915	23.0546	23.9706	24.5971
A0A0C4DGT3		IQSEC1	SALSS(0.01)S(0.99)LR	S803	27.2857	27.6287	26.8795	26.8482	27.8293	27.7007
R4GNJ5	Adrenocortical dysplasia protein homolog	ACD	TPS(0.03)S(0.97)PLQSCT(0.001)PS(0.698)LS(0.301)PR	S336	22.0318	26.014	24.6936	26.3167	26.1882	25.943
A0A0C4DGU2	Methylmalonic aciduria and homocystinuria type C protein	MMACHC	LALLGLAQPSEKPS(0.093)S(0.894)PS(0.012)PDLPFTTPAPK	S188	26.032	27.568	26.4905	26.6061	26.5661	26.1411
A0A0C4DGU2	Methylmalonic aciduria and homocystinuria type C protein	MMACHC	SWLSPRVS(1)PPAS(1)PGP	S218	26.9179	26.3524	26.5434	25.7076	26.9273	25.976
A0A0C4DGU2	Methylmalonic aciduria and homocystinuria type C protein	MMACHC	SWLSPRVS(1)PPAS(1)PGP	S222	25.9881	25.1356	25.5971	21.8581	26.0581	25.2262
A0A0C4DGZ1	Zinc finger CCCH domain-containing protein 8	ZC3H8	HSAIS(1)PK	S59	24.5997	24.7333	24.865	23.0094	24.71	23.841
A0A0C4DH01	DNA-directed RNA polymerase III subunit RPC5	POLR3E	EREAANEAGDS(1)S(1)QDEAEDDVK	S125	24.5619	24.7537	25.0914	22.1587	24.8926	24.5136
A0A0C4DH01	DNA-directed RNA polymerase III subunit RPC5	POLR3E	EREAANEAGDS(1)S(1)QDEAEDDVK	S126	24.5619	25.6069	26.0036	24.4733	25.6123	25.3276
A0A0C4DH01	DNA-directed RNA polymerase III subunit RPC5	POLR3E	IKEEPVS(1)EEGEEDEEQEAEEEPMDTSPSGLHSK	S467	24.7242	21.1683	24.7991	24.6494	24.9435	24.9593
H7BXT7	BET1-like protein	BET1L	AQS(1)PGAVEEILDRENKR	S9	23.6995	24.5221	24.1625	26.3075	25.133	23.5047
A0A0D2X7Z3	Cryptochrome-2	CRY2	PLPS(0.074)GPAS(0.926)PK	S579	23.0958	22.9403	22.764	21.6735	23.1526	22.3633
J3QR29	Cyclin-dependent kinase 11B;Cyclin-dependent kinase 11A	CDK11B;CDC2L1;CDK11A	DLLSDLQDIS(0.97)DS(0.03)ER	S236	22.5664	21.8654	22.6279	22.2264	22.1672	21.4243
J3QR29	Cyclin-dependent kinase 11B	CDK11B;CDC2L1	EYGS(1)PLK	S542	27.7747	27.3161	27.2619	28.3059	27.6424	27.8176
J3QR29	Cyclin-dependent kinase 11B;Cyclin-dependent kinase 11A	CDK11B;CDC2L1;CDK11A	RGT(1)S(1)PRPPEGGLGYSQLGDDDLK	S705	23.1642	23.4378	23.7903	25.4052	23.7902	24.6912
J3QR29	Cyclin-dependent kinase 11B	CDK11B;CDC2L1;CDK11A	MEIT(0.001)IRNS(0.999)PYR	S31	24.7599	24.1548	24.4956	21.779	24.7757	24.5509
J3QR29	Cyclin-dependent kinase 11B	CDK11B;CDC2L1;CDK11A	RDS(1)LEEGELRDHR	S13	25.3576	25.1962	25.2496	26.6087	25.2376	25.3032
A0A0D9SEJ8	Zinc finger protein 280B	ZNF280B	S(0.018)T(0.018)DS(0.963)PIIIEPLSKPDYR	S114	20.3849	23.2113	22.6792	23.3328	24.3018	23.8685
A0A0D9SEU5	Ran-binding protein 10	RANBP10	S(0.003)QDS(0.988)Y(0.013)PGS(0.939)PS(0.16)LS(0.897)PR	S361	25.4915	25.004	25.3487	26.5219	25.9987	25.0618
A0A0D9SEU5	Ran-binding protein 10	RANBP10	SQDSY(0.004)PGS(0.97)PS(0.246)LS(0.779)PR	S365	26.2075	25.004	26.3631	25.535	26.8255	26.2074
A0A0D9SEU5	Ran-binding protein 10	RANBP10	SQDS(0.007)Y(0.004)PGS(0.784)PS(0.257)LS(0.95)PR	S369	26.2075	26.4278	26.3631	25.535	26.8255	26.2074
C9J840	Mitogen-activated protein kinase kinase kinase kinase 4	MAP4K4	AASSLNLS(1)NGETESVK	S553	21.756	23.0535	23.1823	24.8841	23.8911	24.0307
C9J840	Mitogen-activated protein kinase kinase kinase kinase 4	MAP4K4	T(0.006)T(0.009)S(0.989)RS(0.995)PVLSRR	S373	25.8084	25.4557	24.4841	24.2434	22.9481	25.4616
C9J840	Mitogen-activated protein kinase kinase kinase kinase 4	MAP4K4	T(0.195)T(0.257)S(0.551)RS(0.997)PVLSR	S375	27.394	26.8588	26.2179	26.3536	25.5974	25.4616
A0A0D9SFB3	ATP-dependent RNA helicase DDX3X	DDX3X	GKS(1)SFFSDR	S82	23.7912	23.7446	23.911	23.7117	24.1172	23.8666
A0A0D9SFB3	ATP-dependent RNA helicase DDX3X	DDX3X	SSFFS(0.003)DRGS(0.974)GS(0.023)R	S90	28.4506	27.8329	28.1029	26.2222	26.9108	25.8422
E7EXA6	Chromosome transmission fidelity protein 18 homolog	CHTF18	GDAAS(0.009)S(0.991)PAPAAS(0.001)VGS(0.961)S(0.038)QGGAR	S64	26.1542	25.5465	26.4724	26.0427	24.9003	26.265
E7EXA6	Chromosome transmission fidelity protein 18 homolog	CHTF18	GDAAS(0.009)S(0.991)PAPAAS(0.001)VGS(0.961)S(0.038)QGGAR	S73	25.8991	25.5465	25.8077	25.5391	23.7686	25.0221
E7EXA6	Chromosome transmission fidelity protein 18 homolog	CHTF18	VENSPQVDGS(1)PPGLEGLLGGIGEK	S871	26.3315	26.0684	26.3032	26.2827	26.1493	26.062
A0A0D9SF60	Plakophilin-4	PKP4	AAS(0.994)PY(0.006)S(0.024)QRPAS(0.806)PT(0.171)AIRR	S273	25.3706	22.7984	25.0293	25.8713	25.9694	25.093
A0A0D9SF60	Plakophilin-4	PKP4	AAS(0.945)PY(0.039)S(0.049)QRPAS(0.933)PT(0.034)AIR	S281	25.3706	22.7984	25.0293	25.8713	25.9694	25.093
A0A0D9SF60	Plakophilin-4	PKP4	QT(0.209)S(0.791)NPNGPT(0.001)PQYQTTAR	S297	22.5331	22.7048	22.688	22.0615	21.9121	22.4149
A0A0D9SF60		PKP4	TGS(1)GIGNLQR	S447	22.6531	22.7672	21.3333	23.7382	23.815	24.032
A0A0D9SF60	Plakophilin-4	PKP4	VGS(1)PLTLTDAQTR	S314	26.5693	25.5724	25.9436	26.637	26.4476	26.2527
A0A0D9SFV9	Myocyte-specific enhancer factor 2C	MEF2C	NS(1)PGLLVS(1)PGNLNK	S25	23.9193	24.0943	24.2538	25.031	23.913	23.1097
A0A0D9SFV9	Myocyte-specific enhancer factor 2C	MEF2C	NS(1)PGLLVS(1)PGNLNK	S31	22.9787	23.8629	24.5145	24.0336	24.0804	23.8538
A0A0D9SFK2	Unconventional myosin-XVIIIa	MYO18A	SSS(1)PTSYWK	S1991	24.1434	23.7008	25.2799	24.6913	23.6647	23.5243
A0A0D9SFK2	Unconventional myosin-XVIIIa	MYO18A	GFFNLNRS(0.167)S(0.833)KR	S52	23.4816	22.8514	22.9515	21.3777	22.5436	22.35
A0A0D9SFK2	Unconventional myosin-XVIIIa	MYO18A	SLAPDRS(1)DDEHDPLDNTSRPR	S2004	27.1792	26.5025	27.0575	27.2165	22.0733	26.9217
A0A0D9SFK2	Unconventional myosin-XVIIIa	MYO18A	YSHSYLS(1)DS(0.999)DT(0.001)EAK	S2025	25.6525	25.1863	25.6492	27.0001	26.1727	25.7046
A0A0D9SFK2	Unconventional myosin-XVIIIa	MYO18A	YSHSYLS(1)DS(1)DTEAK	S2027	25.6525	25.1863	25.6492	27.0001	26.1727	25.7046
A0A0X1KG75	Cordon-bleu protein-like 1	COBLL1	DQTAS(1)APATPLVNK	S296	25.1957	25.0133	25.3084	25.7166	25.0846	25.3619
A0A0D9SGI3	Ubiquitin-protein ligase E3A	UBE3A	IGDS(0.001)S(0.999)QGDNNLQK	S222	24.3943	25.3547	24.5897	24.0781	23.9334	24.5107
A0A0D9SG79	Ubiquitin-associated protein 1	UBAP1	VLS(1)PPHIK	S172	23.9637	23.8144	23.6576	23.3049	23.5914	23.5988
A0A0D9SGJ6	Synaptojanin-1	SYNJ1	AQLSVQT(0.108)S(0.89)PVPT(0.001)PDPK	S1298	22.621	22.8114	23.0715	24.3694	23.5558	23.5236
A0A0D9SGJ6	Synaptojanin-1	SYNJ1	SAEDLDLLNAS(1)FQDESK	S825	23.9896	23.6886	23.8369	24.484	24.2976	20.8689
A0A0G2JHC2	Phostensin	PPP1R18	LS(0.999)PGES(0.001)AYQK	S224	22.1122	23.2656	23.6227	23.9139	22.1426	22.2191
H0Y6K2	Bromodomain-containing protein 2	BRD2	KADTTTPTPTAILAPGS(0.997)PAS(0.648)PPGS(0.355)LEPK	S304	26.1373	26.2755	26.1927	26.1233	26.0399	25.8335
H0Y6K2	Bromodomain-containing protein 2	BRD2	KADTTTPT(0.001)PT(0.002)AILAPGS(0.994)PAS(0.859)PPGS(0.145)LEPK	S307	26.1373	26.4803	26.1927	26.1233	26.0399	25.8335
C9J9T8	Uncharacterized protein C6orf10	C6orf10	KS(0.026)VS(0.974)DVPR	S319	25.9235	25.5751	21.8304	25.7556	24.0238	25.4478
K7EMK2	NACHT, LRR and PYD domains-containing protein 2	NLRP2	ENLPENVTAS(0.169)ES(0.831)DAEVER	S76	23.2351	21.5766	21.6888	24.8161	23.9689	23.7115
A0A0G2JMS7	Protein scribble homolog	SCRIB	AFAAVPTSHPPEDAPAQPPT(0.999)PGPAAS(0.988)PEQLS(0.012)FR	S1267	26.4768	26.2157	24.8119	27.0977	25.7899	22.0476
A0A0G2JMS7	Protein scribble homolog	SCRIB	ALAAVPS(0.001)AGS(0.003)VQRVPS(0.996)GAAGGK	S1204	24.1978	23.7619	24.6729	23.7594	24.5071	23.2628
A0A0G2JMS7	Protein scribble homolog	SCRIB	ALS(1)PAELR	S1405	25.0709	24.7185	24.8981	26.1841	25.9528	25.7076
A0A0G2JMS7	Protein scribble homolog	SCRIB	ELS(1)PEGPGKEK	S1151	24.3757	23.7566	23.4816	24.1975	23.0965	23.7689
A0A0G2JMS7	Protein scribble homolog	SCRIB	LPLLPPES(1)PGPLR	S772	22.2364	22.2577	21.2166	21.9977	22.398	22.0587
A0A0G2JMS7	Protein scribble homolog	SCRIB	LAEAPSPAPTPS(0.038)PT(0.283)PVEDLGPQT(0.134)S(0.159)T(0.189)S(0.201)PGRLS(0.996)PDFAEELR	S1485	24.7374	28.2728	26.767	27.6764	26.8427	26.2633
A0A0G2JMS7	Protein scribble homolog	SCRIB	VQS(1)PEPPAPER	S1394	24.4562	24.6171	24.172	25.7824	25.5589	25.9856
A0A0G2JMS7	Protein scribble homolog	SCRIB	MKS(1)LEQDALR	S1427	25.452	26.0013	25.2689	26.0813	26.0038	26.2
A0A0G2JMS7	Protein scribble homolog	SCRIB	MVEPENAVTITPLRPEDDYS(1)PR	S754	24.8001	23.8742	28.1539	26.3933	26.2602	26.4635
A0A0G2JMS7	Protein scribble homolog	SCRIB	NS(1)LES(0.986)IS(0.12)S(0.894)IDR	S1139	23.766	23.4649	23.5914	24.4454	23.3343	23.3915
A0A0G2JMS7	Protein scribble homolog	SCRIB	NS(1)LES(0.986)IS(0.12)S(0.894)IDR	S1142	22.2734	20.7639	21.8248	22.5047	21.9266	22.4216
A0A0G2JMS7	Protein scribble homolog	SCRIB	NS(1)LES(0.986)IS(0.12)S(0.894)IDR	S1145	21.9448	21.4325	22.4983	22.5047	21.9266	22.4216
A0A0G2JMS7	Protein scribble homolog	SCRIB	QSPAS(1)PPPLGGGAPVR	S1367	26.6477	26.1984	26.235	27.5251	27.667	27.4613
A0A0G2JMS7	Protein scribble homolog	SCRIB	SEACPCQPDS(0.004)GS(0.996)PLPAEEEK	S423	21.4808	26.0223	24.4012	25.1806	24.3623	24.7908
A0A0G2JMS7	Protein scribble homolog	SCRIB	RVS(1)LVGADDLRK	S1297	27.1243	27.4574	26.968	25.7065	25.8831	25.9098
I3L170	Microtubule-associated protein;Microtubule-associated protein tau	MAPT	AKTDHGAEIVY(0.005)KS(0.996)PVVS(0.946)GDT(0.326)S(0.726)PR	S296	24.8291	24.6346	24.835	25.3198	25.3725	24.9431
I3L170	Microtubule-associated protein;Microtubule-associated protein tau	MAPT	AKTDHGAEIVY(0.005)KS(0.996)PVVS(0.946)GDT(0.326)S(0.726)PR	S300	24.8291	24.6346	24.835	25.3198	25.3725	24.9431
I3L170	Microtubule-associated protein;Microtubule-associated protein tau	MAPT	S(0.033)GY(0.028)S(0.142)S(0.808)PGS(0.957)PGT(0.029)PGS(0.003)R	S133	26.1871	22.0209	26.3476	21.3951	21.8337	22.814
A0A0G2JNT7	KAT8 regulatory NSL complex subunit 1	KANSL1	TFPLAHS(1)PQAECEDQLDAQER	S1045	24.5015	24.2861	24.5617	24.7768	24.5744	24.3979
A0A0J9YX88	PHD and RING finger domain-containing protein 1	PHRF1	AEAPS(0.015)S(0.985)PDVAPAGKEDS(0.705)PS(0.223)AS(0.072)GR	S1360	24.334	23.526	23.3921	24.4914	22.4453	21.3276
A0A0J9YX88	PHD and RING finger domain-containing protein 1	PHRF1	AEAPS(0.351)S(0.649)PDVAPAGKEDS(0.978)PS(0.02)AS(0.001)GR	S1371	24.334	23.526	23.3921	24.4914	22.4453	21.0998
A0A0J9YX88	PHD and RING finger domain-containing protein 1	PHRF1	EAS(1)PAPLAQGEPGREDLPTR	S1202	24.4035	24.0881	24.2526	25.3025	24.7665	24.8158
A0A0J9YX88	PHD and RING finger domain-containing protein 1	PHRF1	ECS(0.997)PT(0.002)SSLER	S1124	26.1578	26.2059	25.6488	25.9984	26.0132	25.8546
A0A0J9YX88	PHD and RING finger domain-containing protein 1	PHRF1	GAVAAEGAS(1)DT(1)EREEPTESQGLAAR	S915	27.0933	26.0252	25.8835	26.9071	27.2696	26.3292
A0A0J9YX88	PHD and RING finger domain-containing protein 1	PHRF1	KENPS(1)PLFSIK	S814	22.9108	23.0471	22.7736	22.155	22.6533	23.3823
A0A0J9YX88	PHD and RING finger domain-containing protein 1	PHRF1	LRRPS(1)PPEPWDEEDGAS(0.679)CS(0.152)T(0.167)FFGS(0.003)EER	S936	21.0839	23.1952	22.409	23.7576	24.6468	24.6411
A0A0J9YX88	PHD and RING finger domain-containing protein 1	PHRF1	MDDDS(1)LDELVAR	S5	23.2222	23.5342	23.0552	23.9344	24.0702	24.022
A0A0J9YX88	PHD and RING finger domain-containing protein 1	PHRF1	TISINS(1)PKAQTVQAVR	S867	26.6444	26.4987	26.577	27.2206	27.2628	27.2883
A0A0J9YX88	PHD and RING finger domain-containing protein 1	PHRF1	TVTCVTVVEPEAPPS(0.999)PDVLQAAT(0.001)HR	S973	26.206	26.3405	26.8547	27.2097	26.7908	26.3866
A0A0J9YX62			EAAVEQAQS(0.439)ET(0.568)S(0.993)LGAR	S315	23.6228	24.2691	23.9251	21.0447	24.1589	23.6985
A0A0J9YXZ5	Ras GTPase-activating-like protein IQGAP1	IQGAP1	ALQS(1)PALGLR	S330	21.8661	21.1833	21.4537	21.9985	21.8234	21.6333
A0A0J9YXZ5	Ras GTPase-activating-like protein IQGAP1	IQGAP1	S(1)AADEVDGLGVARPHYGSVLDNER	S2	22.3717	23.5714	22.0653	24.4308	23.8469	24.0956
A0A0J9YYE2	Zinc finger CCCH domain-containing protein 3	ZC3H3	AS(0.023)S(0.973)PS(0.002)ASSSSSFR	S383	24.4176	24.1645	24.6385	23.6701	24.693	24.471
A0A0J9YYJ3	Transmembrane protein 184B	TMEM184B	TLLLS(1)S(1)DDEF	S344	22.5087	22.1129	21.4096	24.0759	23.9314	22.4575
D6REM6	Matrin-3	MATR3	RDS(1)FDDRGPSLNPVLDYDHGSR	S188	30.5975	30.5338	30.8602	30.0186	30.8479	30.6761
D6REM6	Matrin-3	MATR3	DSFDDRGPSLNPVLDYDHGS(1)R	S206	23.6169	24.1631	24.8694	26.0612	25.304	25.1071
D6REM6	Matrin-3	MATR3	MKS(1)QAFIEMETR	S533	22.5891	21.9198	23.0734	21.1534	21.596	21.0729
D6REM6	Matrin-3	MATR3;DKFZp686L22104	S(0.997)KS(0.003)FQQSSLSR	S2	24.5269	23.9445	24.3787	24.4227	24.7009	24.4441
D6REM6	Matrin-3	MATR3	SYS(1)PDGKESPSDKK	S598	28.0652	28.0085	27.6354	27.2592	27.4995	27.2716
D6REM6	Matrin-3	MATR3	S(0.001)YS(0.999)PDGKES(0.985)PS(0.015)DKK	S604	27.4447	27.3966	26.931	26.4479	26.7482	26.7283
A0A1B0GU90	Ceroid-lipofuscinosis neuronal protein 6	CLN6	HGS(1)VSADEAAR	S7	27.0547	27.2997	26.9598	25.6742	26.0092	25.7726
A0A0U1RQF0	Fatty acid synthase;[Acyl-carrier-protein] S-acetyltransferase;[Acyl-carrier-protein] S-malonyltransferase;3-oxoacyl-[acyl-carrier-protein] synthase;3-oxoacyl-[acyl-carrier-protein] reductase;3-hydroxyacyl-[acyl-carrier-protein] dehydratase;Enoyl-[acyl-carrier-protein] reductase;Oleoyl-[acyl-carrier-protein] hydrolase	FASN	LGMLS(1)PEGTCK	S207	26.1133	25.4283	25.703	26.1719	26.3441	25.7494
A0A0U1RQF0	Fatty acid synthase;[Acyl-carrier-protein] S-acetyltransferase;[Acyl-carrier-protein] S-malonyltransferase;3-oxoacyl-[acyl-carrier-protein] synthase;3-oxoacyl-[acyl-carrier-protein] reductase;3-hydroxyacyl-[acyl-carrier-protein] dehydratase;Enoyl-[acyl-carrier-protein] reductase;Oleoyl-[acyl-carrier-protein] hydrolase	FASN	LLS(1)AACR	S1183	21.9032	21.1938	21.9179	21.4059	21.6799	21.5849
A0A0U1RQF0	Fatty acid synthase;[Acyl-carrier-protein] S-acetyltransferase;[Acyl-carrier-protein] S-malonyltransferase;3-oxoacyl-[acyl-carrier-protein] synthase;3-oxoacyl-[acyl-carrier-protein] reductase;3-hydroxyacyl-[acyl-carrier-protein] dehydratase;Enoyl-[acyl-carrier-protein] reductase;Oleoyl-[acyl-carrier-protein] hydrolase	FASN	RPT(0.058)PQDS(0.942)PIFLPVDDTSFR	S1409	23.6096	22.6258	22.6071	22.6552	22.8533	22.3659
A0A0U1RQI5			SAT(0.001)AS(0.999)PQQPQAQQR	S426	23.7255	22.3543	23.353	24.2271	24.3971	23.4325
A0A0U1RQJ8	ATR-interacting protein	ATRIP	KNPSVVIKPEACS(1)PQFGK	S52	24.7853	24.955	21.4755	23.9902	24.221	24.0417
A0A0U1RQJ8	ATR-interacting protein	ATRIP	LAAPSVSHVS(1)PR	S37	26.6859	25.8272	26.5181	26.7367	26.8958	26.0554
A0A0U1RQJ8	ATR-interacting protein	ATRIP	SLVHRLS(1)DGDMTSALR	S331	23.3491	22.8553	23.1077	22.0959	23.2095	22.0022
H0YKX3	PCNA-associated factor	KIAA0101	GIGEFFRLS(1)PK	S45	23.8322	22.9002	21.3767	23.1391	22.6431	22.4396
A0A0U1RQY9	Ubiquitin-associated and SH3 domain-containing protein A	UBASH3A	S(0.768)LS(0.23)S(0.002)LQALQATVAR	S344	21.6862	20.8927	21.382	21.3812	20.3006	20.4634
A0A1W2PS06	Probable global transcription activator SNF2L2	SMARCA2	AKPVVS(1)DFDS(1)DEEQDER	S116	24.6699	24.37	24.9859	25.9442	24.9667	24.8045
A0A1W2PS06	Probable global transcription activator SNF2L2	SMARCA2	AKPVVS(1)DFDS(1)DEEQDER	S120	24.6699	24.37	24.9859	25.9442	24.9667	24.8045
A0A0U1RR27	C-myc promoter-binding protein	DENND4A	S(0.002)IS(0.976)T(0.022)S(0.001)GPLDKEDTGRQK	S1633	24.6494	24.4763	24.3813	24.6893	24.4211	24.5608
A0A0U1RR39	E3 ubiquitin-protein ligase CBL	CBL	GSGS(1)LLR	S441	21.8266	22.5882	22.6009	23.4757	24.0478	24.2814
A0A0U1RRH6	PHD finger protein 14	PHF14	NSADDEELT(1)NDS(0.961)LT(0.036)LS(0.003)QSK	S290	25.8989	25.3442	25.6088	25.8279	25.5301	24.9579
A0A0U1RRH6	PHD finger protein 14	PHF14	PLT(0.003)S(0.204)S(0.816)AS(0.977)AIR	S572	22.8188	22.9379	22.596	22.0369	22.273	20.7193
A0A0U1RRH6	PHD finger protein 14	PHF14	PLT(0.003)S(0.204)S(0.816)AS(0.977)AIR	S574	22.8188	22.9379	22.596	22.0369	22.273	21.335
A0A0U1RRL5	ETS-related transcription factor Elf-1	ELF1	TIQAPTQVPVVVS(1)PR	S432	21.8617	25.3402	25.3072	25.3367	25.4677	24.8767
A0A0U1RRL5	ETS-related transcription factor Elf-1	ELF1	TKPPRPDS(0.987)PAT(0.009)T(0.002)PNIS(0.001)VK	S187	25.7604	21.7415	24.989	25.7196	26.0734	25.3966
A0A0U1RRL5	ETS-related transcription factor Elf-1	ELF1	YADSPGAS(0.082)S(0.918)PEQPK	S168	25.0962	25.4708	25.0834	25.7355	25.323	24.9779
A0A0U1RRM1	Transcriptional repressor p66-beta	GATAD2B	GRLT(1)PS(1)PDIIVLS(1)DNEAS(0.29)S(0.71)PR	S122	26.7412	26.6606	26.7734	26.4136	25.5715	25.9898
A0A0U1RRM1	Transcriptional repressor p66-beta	GATAD2B	GRLT(1)PS(1)PDIIVLS(1)DNEAS(0.29)S(0.71)PR	S129	24.6121	25.9617	25.35	26.5115	26.4083	26.1972
A0A0U1RRM1	Transcriptional repressor p66-beta	GATAD2B	LTPSPDIIVLS(0.288)DNEAS(0.866)S(0.846)PR	S134	25.0956	25.303	25.8201	26.3566	26.2512	25.5716
A0A0U1RRM1	Transcriptional repressor p66-beta	GATAD2B	GRLT(0.921)PS(0.079)PDIIVLSDNEAS(0.068)S(0.932)PR	S135	27.2918	27.6653	27.0213	27.2384	26.7818	27.1307
A0A0U1RRM1	Transcriptional repressor p66-beta	GATAD2B	LQQQAALS(0.986)PT(0.012)T(0.003)APAVSSVSK	S470	24.7745	25.0501	24.3537	25.4389	24.1765	24.7985
A0A0U1RRM4			GPAADPS(0.002)S(0.998)PGTSGVGPAAGAGDSR	S155	25.4849	25.6014	25.851	25.5353	24.8207	25.0402
A0A0U1RRM6			TNTMNGS(0.009)KS(0.986)PVIS(0.004)RPK	S740	24.0817	23.4554	24.2593	24.3247	24.6771	25.0065
A0A0X1KG71	Negative elongation factor B	NELFB	KPS(1)PAQAAETPALELPLPSVPAPAPL	S605	28.0549	28.3271	28.0557	28.7329	28.1668	28.5434
A0A140LJL2	Protein Dos	DOS	HAS(1)LDGASPYFK	S319	23.4245	23.947	23.27	22.8497	23.8702	23.6984
A0A140LJL2	Protein Dos	DOS	LAEPVVATPALVAAAPT(0.229)S(0.778)PDHS(0.993)PA	S719	23.5261	22.6204	21.1192	23.1794	22.306	21.6568
A0A140LJL2	Protein Dos	DOS	LAEPVVATPALVAAAPT(0.229)S(0.778)PDHS(0.993)PA	S723	23.5261	22.6204	21.1192	23.1794	22.306	22.0307
A0A140T936	Valine--tRNA ligase	VARS	VQGS(0.001)DS(0.999)DEEVVVATTR	S446	23.0224	21.7532	21.1687	23.9342	22.3112	23.0789
A2AB15	Putative pre-mRNA-splicing factor ATP-dependent RNA helicase DHX16	DHX16	LLEDS(1)EES(0.962)S(0.038)EETVSR	S43	30.9589	30.7709	30.851	30.848	30.7062	30.6095
A2AB15	Putative pre-mRNA-splicing factor ATP-dependent RNA helicase DHX16	DHX16	LLEDS(1)EES(0.977)S(0.023)EETVSR	S46	30.9271	30.7213	30.8047	30.8205	30.6775	30.577
A2AB15	Putative pre-mRNA-splicing factor ATP-dependent RNA helicase DHX16	DHX16	QQTEKPES(1)EDEWER	S100	26.2473	26.2778	26.427	27.2561	26.1066	25.6962
A2AB20	Kinesin-like protein KIFC1	KIFC1	MDPQRS(1)PLLEVK	S6	27.8026	27.5201	27.5698	27.5838	27.5077	27.3959
A0A140T9S5	von Willebrand factor A domain-containing protein 7	VWA7	EILS(1)PLR	S461	26.7559	26.3158	26.4702	26.2707	26.5398	26.5192
A0A140TA73	Beta-2-syntrophin	SNTB2	GLGPPS(1)PPAPPRGPAGEAGAS(1)PPVRR	S95	23.4821	25.1021	23.3786	25.1181	26.1358	26.4608
A0A140TA73	Beta-2-syntrophin	SNTB2	GPAGEAGAS(1)PPVRR	S110	22.7392	25.2495	23.3344	24.1541	26.0524	26.5152
A0A1B0GTL5	Rab11 family-interacting protein 5	RAB11FIP5	T(0.002)Y(0.002)S(0.996)DEANQMR	S307	23.3022	23.5788	22.7215	23.7727	23.8116	23.3683
F5GZ78	Paxillin	PXN	T(0.005)GS(0.005)S(0.138)S(0.852)PPGGPPKPGSQLDSMLGSLQSDLNK	S320	24.7823	23.5289	24.7549	25.2268	24.6621	20.9768
F5GZ78	Paxillin	PXN	TSSVSNPQDS(0.002)VGS(0.974)PCS(0.025)R	S104	24.104	24.6007	24.5403	24.2721	21.3887	23.8694
A0A1B0GTW1	Tight junction protein ZO-2	TJP2	AYS(1)PEYR	S325	26.0525	25.9759	25.7907	26.0592	26.0148	25.8835
A0A1B0GTW1	Tight junction protein ZO-2	TJP2	DSQQTLINIPS(0.276)LNDS(0.786)DS(0.933)EIEDIS(0.004)EIESNR	S459	21.7494	26.0402	26.1271	26.1232	26.1881	26.4509
A0A1B0GTW1	Tight junction protein ZO-2	TJP2	S(1)IDQDYER	S303	27.8265	27.367	27.9705	27.2968	27.6538	26.9825
A0A1B0GTW1	Tight junction protein ZO-2	TJP2	GSYGS(1)DAEEEEYR	S1218	26.2339	25.7461	26.1048	27.4548	26.4706	26.0557
A0A1B0GTW1	Tight junction protein ZO-2	TJP2	VQVAALQAS(1)PPLDQDDR	S189	25.5603	25.4837	25.3894	25.8946	25.4399	25.632
A0A1B0GTW1	Tight junction protein ZO-2	TJP2	SFS(1)PEER	S474	24.9515	24.7957	24.7313	24.7311	24.6348	24.7429
A0A1B0GTW1	Tight junction protein ZO-2	TJP2	SILKPSTPIPPQEGEEVGES(0.982)S(0.018)EEQDNAPK	S1126	25.0658	24.9801	25.0712	25.4301	25.7661	25.2935
A0A1B0GTW1	Tight junction protein ZO-2	TJP2	S(0.025)RS(0.975)WEDS(1)PER	S229	25.6734	25.6762	25.9358	26.4657	25.7728	25.4708
A0A1B0GTW1	Tight junction protein ZO-2	TJP2	SWEDS(1)PER	S233	25.789	25.7955	26.0838	26.6963	26.0172	25.6763
A0A1B0GU80	Cilia- and flagella-associated protein 54	CFAP54	IS(0.001)GS(0.848)PLT(0.15)LK	S1646	23.8283	22.9266	23.3397	24.8339	24.3391	24.6514
A0A1B0GUI1	Ral GTPase-activating protein subunit alpha-1	RALGAPA1	RGS(0.992)S(0.976)PGS(0.031)LEIPK	S1319	24.1977	24.2987	24.4969	25.5504	24.3915	23.8923
A0A1B0GUI1	Ral GTPase-activating protein subunit alpha-1	RALGAPA1	RGS(0.992)S(0.976)PGS(0.031)LEIPK	S1320	24.1977	23.7047	24.1353	25.2697	23.9126	23.8923
A0A1B0GUN3			QVCS(1)PEGGPLPASHWDQNGPAQR	S67	23.9042	24.0507	23.9247	21.7914	22.8548	21.118
A0A1B0GUZ7	Protein EFR3 homolog A	EFR3A	LSVPYVPQVT(0.051)DEDRLS(0.949)R	S721	25.7506	25.5372	26.5047	25.6934	25.405	20.3604
H0YHT2	Kinesin-like protein KIF21A	KIF21A	EKELS(1)PPPGLPSK	S560	25.5219	25.3624	25.4731	25.5035	25.6098	25.4464
H0YHT2	Kinesin-like protein KIF21A	KIF21A	KIPEPS(0.955)PVT(0.045)R	S587	25.1119	27.3503	24.7703	25.3457	25.788	25.8341
H0YHT2	Kinesin-like protein KIF21A	KIF21A	KLS(0.992)S(0.006)S(0.002)DAPAQDTGSSAAAVETDASR	S201	25.4242	25.8501	25.1781	25.5127	25.5696	25.8269
H0YHT2	Kinesin-like protein KIF21A	KIF21A	NLQDGQIS(0.673)DT(0.327)GDLGEDIAS(1)N	S974	24.292	21.648	24.3661	25.0875	24.8237	23.731
A0A1B0GV57	TGF-beta-activated kinase 1 and MAP3K7-binding protein 2	TAB2	AIGNNSAT(0.048)S(0.952)PR	S166	27.354	21.602	25.0818	24.349	24.7713	24.1718
A0A1B0GV70	AP-4 complex accessory subunit tepsin	ENTHD2	TRPWLQELSMGS(0.999)PGPVTNK	S401	23.0024	22.2543	22.851	23.8021	23.5641	22.8245
E7EUR8	Protein FAM193A	FAM193A	LILTDSGSAPTFCS(1)DDEDVAPLSAK	S147	25.8048	25.5868	25.5367	26.2826	25.9313	25.1441
E7EUR8	Protein FAM193A	FAM193A	LVLAES(1)PQPK	S998	27.0405	27.1908	26.9651	27.1924	27.1281	27.1488
H3BPJ7	Transcription factor 4	TCF4	DLGSHDNLS(1)PPFVNSR	S68	23.8597	23.7976	23.7021	23.1409	21.9175	23.4129
H3BPJ7	Transcription factor 4	TCF4	GMPPGLQGQS(0.026)VS(0.026)S(0.026)GS(0.026)S(0.026)EIKS(0.868)DDEGDENLQDTK	S490	24.5785	20.7015	21.8623	24.3224	25.0275	23.9385
H3BPJ7	Transcription factor 4	TCF4	NGGQAS(0.001)S(0.07)S(0.928)PNYEGPLHSLQSR	S347	23.4645	21.5628	23.1632	23.3886	23.6316	23.3276
A0A1B0GVY1	E3 ubiquitin-protein ligase NEDD4-like	NEDD4L	SLS(0.988)S(0.012)PTVTLSAPLEGAK	S727	28.4182	28.1659	28.0923	28.4477	28.4723	28.2349
A0A1B0GW05			APLS(1)PGRK	S46	22.2758	22.3431	22.1079	20.9234	22.4193	22.308
A0A1B0GW05			AS(0.046)QS(0.951)PLRGAS(0.003)DVGAGEPGPER	S25	24.6764	23.8958	23.7069	21.7939	24.5439	23.7716
E9PEN0	Inhibitor of growth protein 5	ING5	MEGS(0.999)DFESSGGR	S118	23.3582	23.572	23.6738	25.03	23.9138	23.6791
P11171	Protein 4.1	EPB41	HHAS(0.998)IS(0.002)ELKK	S684	23.7421	24.7757	23.8019	21.3314	23.7979	23.1486
P11171	Protein 4.1	EPB41	RLS(1)T(0.896)HS(0.104)PFR	S709	25.1569	27.4805	26.5909	25.8924	26.8443	27.0146
P11171	Protein 4.1	EPB41	RLS(0.368)T(0.633)HS(0.999)PFR	S712	27.2476	26.6743	26.5935	23.1922	27.4411	27.2802
A0A1B0GWK2	Kazrin	KAZN	MGFGS(0.995)IS(0.005)R	S475	23.8626	23.7336	23.1584	23.2081	23.3687	23.3327
A0A1P0AZG4			EDNPEEPSKEITSHEEGGGDVS(1)PR	S273	25.507	20.7659	25.4186	26.3615	25.1935	25.4851
J3KNE0	RANBP2-like and GRIP domain-containing protein 2;RANBP2-like and GRIP domain-containing protein 1;RanBP2-like and GRIP domain-containing protein 3;RANBP2-like and GRIP domain-containing protein 5/6;RANBP2-like and GRIP domain-containing protein 8	RGPD1;RGPD2;RGPD3;RGPD8;RGPD5	AVVS(1)PPKFVFGSESVKR	S1529	25.2651	26.2386	26.2979	26.3311	26.3368	26.2284
P49792	RANBP2-like and GRIP domain-containing protein 2;RANBP2-like and GRIP domain-containing protein 1;RanBP2-like and GRIP domain-containing protein 3;RANBP2-like and GRIP domain-containing protein 5/6;RANBP2-like and GRIP domain-containing protein 8;E3 SUMO-protein ligase RanBP2	RGPD1;RGPD2;RGPD3;RGPD8;RGPD5;RANBP2;RGPD6	DSLIT(1)PHVS(1)R	S2454	23.3855	22.9474	24.7879	25.3852	23.546	24.3849
P49792	RANBP2-like and GRIP domain-containing protein 2;RANBP2-like and GRIP domain-containing protein 1;RanBP2-like and GRIP domain-containing protein 3;RANBP2-like and GRIP domain-containing protein 5/6;RANBP2-like and GRIP domain-containing protein 8;E3 SUMO-protein ligase RanBP2	RGPD1;RGPD2;RGPD3;RGPD8;RGPD5;RANBP2	FGIS(1)EPGNQEK	S1903	23.5695	22.8758	23.2877	22.2399	21.6275	21.2071
P49792	RANBP2-like and GRIP domain-containing protein 2;RANBP2-like and GRIP domain-containing protein 1;RanBP2-like and GRIP domain-containing protein 3;RANBP2-like and GRIP domain-containing protein 5/6;RANBP2-like and GRIP domain-containing protein 8;E3 SUMO-protein ligase RanBP2	RGPD1;RGPD2;RGPD3;RGPD8;RGPD5;RANBP2;RGPD6	LFPGS(1)PAIYK	S128	23.2012	22.7883	23.1736	22.5689	22.4484	22.1783
	RANBP2-like and GRIP domain-containing protein 2;RANBP2-like and GRIP domain-containing protein 1;RanBP2-like and GRIP domain-containing protein 3	RGPD1;RGPD2;RGPD3	LNQSGT(0.006)S(0.994)VGT(1)DEESDVTQEEER	S非数字	24.5754	24.7789	24.999	25.2119	24.504	24.3178
	RANBP2-like and GRIP domain-containing protein 2;RANBP2-like and GRIP domain-containing protein 1;RanBP2-like and GRIP domain-containing protein 3	RGPD1;RGPD2;RGPD3	LNQSGTSVGT(1)DEES(0.992)DVT(0.008)QEEER	S非数字	24.4734	24.2022	20.4144	25.4401	24.0802	24.6805
J3KNE0	RANBP2-like and GRIP domain-containing protein 2;RANBP2-like and GRIP domain-containing protein 1;RanBP2-like and GRIP domain-containing protein 3;RANBP2-like and GRIP domain-containing protein 5/6;RANBP2-like and GRIP domain-containing protein 8	RGPD1;RGPD2;RGPD3;RGPD8;RGPD5	SALSLS(0.035)KS(0.965)PAK	S1299	23.7501	23.1851	23.5346	24.8331	23.5199	23.2811
P49792	RANBP2-like and GRIP domain-containing protein 2;RANBP2-like and GRIP domain-containing protein 1;RanBP2-like and GRIP domain-containing protein 3;RANBP2-like and GRIP domain-containing protein 5/6;RANBP2-like and GRIP domain-containing protein 8;E3 SUMO-protein ligase RanBP2	RGPD1;RGPD2;RGPD3;RGPD8;RGPD5;RANBP2	S(0.036)T(0.036)S(0.928)GEGFQFGK	S1955	22.3753	22.6535	22.3502	23.6016	22.9442	22.4239
F8VYC4	RANBP2-like and GRIP domain-containing protein 2;RANBP2-like and GRIP domain-containing protein 1	RGPD1;RGPD2	S(0.001)Y(0.001)KY(0.141)S(0.858)PKT(0.998)PPR	S795	23.6203	23.1115	23.4169	24.1641	22.8037	21.1694
F8VYC4	RANBP2-like and GRIP domain-containing protein 2	RGPD1;RGPD2	YLASVQGS(0.036)APS(0.964)PGK	S21	23.1672	21.5377	23.0691	23.7753	23.4929	23.0117
P49792	RANBP2-like and GRIP domain-containing protein 2;RANBP2-like and GRIP domain-containing protein 1;RanBP2-like and GRIP domain-containing protein 3;RANBP2-like and GRIP domain-containing protein 5/6;RANBP2-like and GRIP domain-containing protein 8;E3 SUMO-protein ligase RanBP2	RGPD1;RGPD2;RGPD3;RGPD8;RGPD5;RANBP2	YSLS(0.996)PS(0.004)K	S788	26.0205	25.6606	25.6106	26.0879	25.416	25.63
A0A1W2PNZ9	Probable JmjC domain-containing histone demethylation protein 2C	JMJD1C	IKS(0.455)S(0.546)PS(0.999)PEVVKPK	S459	23.1362	21.9917	22.589	23.2996	23.3915	22.5594
A0A1W2PNZ9	Probable JmjC domain-containing histone demethylation protein 2C	JMJD1C	ITAHS(0.055)S(0.945)PPLTK	S761	23.3983	21.5199	23.4289	23.9007	23.569	23.3016
A0A1W2PNZ9	Probable JmjC domain-containing histone demethylation protein 2C	JMJD1C	ITHS(1)PDSVK	S470	24.6159	23.9787	23.5783	23.9464	24.1374	23.4805
A0A1W2PPS1	Heterogeneous nuclear ribonucleoprotein U	HNRNPU	AKS(1)PQPPVEEEDEHFDDTVVCLDTYNCDLHFK	S252	31.0278	29.9923	30.5861	30.8829	27.3921	29.7923
A0A1W2PPS1	Heterogeneous nuclear ribonucleoprotein U	HNRNPU	LQAALDDEEAGGRPAMEPGNGS(1)LDLGGDSAGR	S59	27.3695	27.4543	27.3961	27.2526	27.3692	27.5141
A0A1W2PPS1	Heterogeneous nuclear ribonucleoprotein U	HNRNPU	LQAALDDEEAGGRPAMEPGNGS(0.002)LDLGGDS(0.998)AGR	S66	24.2365	23.812	24.2877	26.1891	26.1552	21.1916
A0A1W2PPS1	Heterogeneous nuclear ribonucleoprotein U	HNRNPU	S(0.035)S(0.035)GPT(0.035)S(0.895)LFAVTVAPPGAR	S192	25.7633	25.3032	25.2153	25.6871	26.2009	25.7739
A0A1W2PPS1	Heterogeneous nuclear ribonucleoprotein U	HNRNPU	SSS(1)PVNVK	S4	30.9664	30.7524	30.9639	30.3565	30.7425	30.8741
E5RIS7	Transcription elongation factor A protein 1	TCEA1	KKEPAITSQNS(1)PEAR	S100	25.5418	25.0729	25.2543	26.8466	25.3503	25.418
E5RIS7	Transcription elongation factor A protein 1	TCEA1	KQS(0.963)T(0.037)DEEVTSLAK	S57	24.6363	24.4926	24.4844	23.2255	23.3449	23.4854
A0A1X7SBZ2	Probable ATP-dependent RNA helicase DDX17	DDX17	TTS(0.959)S(0.04)ANNPNLMYQDECDRR	S571	21.3229	22.2055	21.358	24.0527	24.4226	22.4991
A0A1W2PQJ7	Retinoic acid-induced protein 1	RAI1	S(1)FLYCNQAR	S481	22.1698	22.1365	22.5212	23.3527	22.3928	21.5167
E9PKE5	Vacuolar protein sorting-associated protein 51 homolog	VPS51	AAAAAAGPS(0.987)PGS(0.015)GPGDS(0.998)PEGPEGEAPER	S10	27.308	24.3874	24.641	23.8083	23.3774	24.212
E9PKE5	Vacuolar protein sorting-associated protein 51 homolog	VPS51	AAAAAAGPS(0.987)PGS(0.015)GPGDS(0.998)PEGPEGEAPER	S18	27.7595	24.3874	27.7625	28.1008	27.4873	27.8298
E7ER60	Synaptojanin-2	SYNJ2	GGAS(1)EEALSAVAPR	S534	21.9589	21.8748	21.3257	23.6962	23.3693	23.386
A0A1X7SBY3	Stromal interaction molecule 2	STIM2	IS(0.021)S(0.979)IPHDLCHNGEK	S719	22.4672	20.947	22.1398	23.0506	22.9031	22.323
A0A1X7SBY3	Stromal interaction molecule 2	STIM2	S(0.101)CS(0.896)MNQLS(0.002)S(0.001)GIPVPKPR	S680	22.519	23.4879	23.0197	22.7564	23.6957	24.2555
A0A1X7SBY3	Stromal interaction molecule 2	STIM2	SIVPS(0.014)S(0.986)PQPQR	S523	25.7977	25.3625	25.8553	26.4492	21.5486	26.0281
A0A1X7SBY3	Stromal interaction molecule 2	STIM2	S(1)MIFSPASK	S661	21.996	21.7624	21.7397	23.3027	22.3864	23.4951
B4DP61	Survival motor neuron protein	SMN2;SMN1	RGT(1)GQS(1)DDS(1)DIWDDTALIK	S28	27.7993	28.0044	27.6528	27.6556	28.0191	26.9853
B4DP61	Survival motor neuron protein	SMN2;SMN1	RGTGQS(1)DDS(1)DIWDDTALIK	S31	26.4363	26.3158	26.3519	27.5464	27.5656	26.2443
A0A1W2PS85	DNA repair protein complementing XP-G cells	BIVM-ERCC5;ERCC5	FDSSLLS(1)S(0.999)DDET(0.001)K	S787	25.4983	24.1997	25.3828	25.2121	25.1821	24.9537
A0A1W2PS85	DNA repair protein complementing XP-G cells	BIVM-ERCC5;ERCC5	FDSS(0.002)LLS(0.998)S(0.999)DDET(0.001)K	S788	23.9556	25.4025	24.5363	25.2121	24.8173	24.4111
A0A1W2PS85	DNA repair protein complementing XP-G cells	BIVM-ERCC5;ERCC5	NAPAAVDEGS(1)IS(1)PR	S607	24.6514	23.9056	24.2294	24.3156	24.0816	23.7974
A0A1W2PS85	DNA repair protein complementing XP-G cells	BIVM-ERCC5;ERCC5	NAPAAVDEGS(1)IS(1)PR	S609	27.4577	27.2136	24.2294	27.5876	27.5464	27.5692
A0A286YEX4	Nuclear factor 1 C-type	NFIC	NWTEDMEGGIS(0.046)S(0.954)PVKK	S345	22.3951	23.3861	23.0729	23.879	22.9794	21.3386
A0A286YFF8	Protein MON2 homolog	MON2	TDS(1)IGEKLGR	S1215	26.7853	26.9696	26.705	23.8759	25.9062	26.1321
H7C148	CCR4-NOT transcription complex subunit 3	CNOT3	STDSEVS(0.106)QS(0.894)PAK	S221	24.3403	23.4505	23.2183	21.659	23.6855	20.9937
A0A5E8	GAS2-like protein 1	GAS2L1	RGS(1)RPEMTPVSLR	S316	25.2859	24.0166	23.801	23.918	24.7495	23.686
E9PMT9	Transcription factor E2F8	E2F8	MLISAVS(1)PEIR	S71	23.5129	22.5152	23.217	25.0604	24.8961	24.5285
A0MZ66	Shootin-1	KIAA1598	VTAEADSS(0.002)S(0.997)PT(0.001)GILATSESK	S494	23.9091	23.7346	24.3305	24.0319	23.5877	23.7157
A0MZ66	Shootin-1	KIAA1598	T(0.005)LEAEFNS(0.843)PS(0.393)PPT(0.759)PEPGEGPR	S532	23.3541	22.9603	23.2535	22.0818	21.6573	21.6347
A1KXE4	Myelin-associated neurite-outgrowth inhibitor	FAM168B	MNPVYS(1)PGSSGVPYANAK	S6	25.1703	25.0721	24.6157	23.8789	24.1667	24.1432
A1L020	RNA-binding protein MEX3A	MEX3A	QNS(1)LGCIGECGVDSGFEAPR	S338	22.7952	21.7225	23.3279	23.0246	22.3423	21.9838
A2A3M4	Cingulin	CGN	S(0.045)HS(0.955)QAS(1)LAGPGPVDPSNR	S137	23.8057	23.4767	23.2755	22.0121	22.8481	22.132
A2A3M4	Cingulin	CGN	S(0.045)HS(0.955)QAS(1)LAGPGPVDPSNR	S140	23.8057	23.4767	23.2755	21.5646	22.8481	21.7029
A2A3M4	Cingulin	CGN	SNS(1)MLELAPK	S155	22.8496	23.0052	22.9707	22.5247	22.1047	22.5022
A2RRE0	WD repeat-containing protein 7	WDR7	ARGS(0.916)PPT(0.028)S(0.028)S(0.028)NIVQGQIK	S260	23.3408	23.1226	23.0318	23.222	23.4311	22.808
A2RU67	Uncharacterized protein KIAA1467	KIAA1467	SPDLGEYDPLTQADS(1)DES(1)EDDLVLNLQK	S30	24.0224	24.5568	24.5768	20.1612	24.4315	24.7048
A2RU67	Uncharacterized protein KIAA1467	KIAA1467	SPDLGEYDPLTQADS(1)DES(1)EDDLVLNLQK	S33	24.0224	24.5568	24.5768	21.6687	24.4315	24.7048
A2RUB6	Coiled-coil domain-containing protein 66	CCDC66	SPS(0.028)S(0.972)PVPVVK	S797	23.7924	23.0791	23.3328	22.7628	21.0223	21.8238
A3KFL1	Exosome complex component RRP4	EXOSC2	S(1)AEDELAMR	S124	21.4223	22.4538	22.4434	23.0392	23.0368	22.7538
A3KN83	Protein strawberry notch homolog 1	SBNO1	LYS(0.001)LLGIDLT(0.109)APS(0.618)NNS(0.698)S(0.697)PRDS(0.878)PCKENK	S697	23.3411	24.3157	24.0026	22.0996	22.0021	23.3218
A3KN83	Protein strawberry notch homolog 1	SBNO1	SFS(1)PTMK	S214	25.8519	24.9206	25.4977	26.4719	25.7942	25.3538
A4D126	Isoprenoid synthase domain-containing protein	ISPD	LVEGS(1)PDLWK	S258	22.2077	27.025	28.6017	28.9245	28.8499	28.1731
A6ND36	Protein FAM83G	FAM83G	AFS(1)QVQCLDDNHVNWR	S4	21.9529	21.8033	23.2061	23.4649	22.7432	21.8757
A6ND36	Protein FAM83G	FAM83G	LLPDPGS(1)PR	S760	23.268	23.3357	23.5231	21.8067	22.7153	22.9363
A6NDA1	HAUS augmin-like complex subunit 7	HAUS7	GGDDYS(1)EDEGDSSVSR	S16	25.3633	25.3157	25.4372	25.2954	24.9678	25.0158
A6NFI3	Zinc finger protein 316	ZNF316	AALHT(0.027)T(0.973)PDS(1)PAAQLER	S10	26.3517	25.9036	25.7612	26.0182	25.6339	26.2825
A6NFI3	Zinc finger protein 316	ZNF316	GGDAKS(1)PVLQEK	S112	26.5432	26.4127	26.3972	25.9596	26.2607	26.0674
A6NFS0	Zinc finger protein 275	ZNF275	ASGPS(1)PEFR	S76	23.7628	23.3151	23.4452	23.6704	23.3123	23.8666
A6NFV8	Dysbindin	DTNBP1	DIS(0.433)EGGES(0.568)PVVQS(0.998)DEEEVQVDT(0.002)ALATSHTDR	S304	24.1184	26.2904	24.3178	24.662	26.5913	26.0018
A6NGP5	Hematological and neurological expressed 1-like protein	HN1L	RTNPPGGKGS(1)GIFDESTPVQTR	S57	21.3889	21.8268	21.5622	23.5362	22.001	22.3244
A6NGP5	Hematological and neurological expressed 1-like protein	HN1L	SIPAGAEPGEKGS(1)AR	S132	22.1902	25.1483	21.288	23.553	23.8851	24.0745
A6NGP5	Hematological and neurological expressed 1-like protein	HN1L	TSDIFGS(1)PVTATSR	S85	28.8511	28.6315	28.5736	28.2702	28.5117	28.2692
A6NGY7	Protein bicaudal C homolog 1	BICC1	S(0.84)S(0.125)Y(0.018)VNMQAFDY(0.018)EQK	S347	23.4312	23.6928	24.2637	21.8323	21.8626	25.3531
A6NHN7	Zinc finger MYM-type protein 3	ZMYM3	T(0.003)GS(0.997)PGPELLFHEGQQK	S466	23.6921	23.3396	23.0504	23.8709	23.4205	23.5206
D6R9V6	Rho GTPase-activating protein 22	ARHGAP22	TSS(1)LDGAAVAVLSR	S228	22.0344	24.4727	23.2914	24.7422	24.6406	25.0525
A6NHT5	Homeobox protein HMX3	HMX3	DS(0.185)S(0.813)PAS(0.701)GT(0.262)DRDS(0.039)PEPLLK	S144	23.7647	23.3331	23.703	22.4419	23.4643	22.6586
A6NHT5	Homeobox protein HMX3	HMX3	DS(0.003)S(0.003)PAS(0.062)GT(0.071)DRDS(0.86)PEPLLK	S153	23.4408	21.6183	24.6071	24.1565	23.6708	23.4638
A6NJA2	Ubiquitin carboxyl-terminal hydrolase;Ubiquitin carboxyl-terminal hydrolase 14	USP14	AS(1)GEMASAQYITAALR	S97	21.4729	23.5388	23.2843	25.1177	24.0506	24.1257
F8WC89	SAC3 domain-containing protein 1	SAC3D1	TLEEVVMAEEEDEGTDRPGS(1)PA	S356	25.2802	25.5746	25.3513	25.3584	25.7061	25.4098
P49792	RanBP2-like and GRIP domain-containing protein 3;RANBP2-like and GRIP domain-containing protein 5/6;RANBP2-like and GRIP domain-containing protein 8;E3 SUMO-protein ligase RanBP2	RGPD3;RGPD8;RGPD5;RANBP2	EDALDDS(0.999)VS(0.032)S(0.032)S(0.156)S(0.782)VHAS(0.977)PLAS(0.698)S(0.325)PVRK	S2237	23.8395	24.0244	24.0034	25.7088	24.6135	24.721
P49792	RanBP2-like and GRIP domain-containing protein 3;RANBP2-like and GRIP domain-containing protein 5/6;RANBP2-like and GRIP domain-containing protein 8;E3 SUMO-protein ligase RanBP2	RGPD3;RGPD8;RGPD5;RANBP2	EDALDDS(0.016)VS(0.093)S(0.079)S(0.069)S(0.784)VHAS(0.956)PLAS(0.214)S(0.788)PVRK	S2242	23.8395	24.0244	24.0034	25.7088	24.6135	24.721
P49792	RanBP2-like and GRIP domain-containing protein 3;RANBP2-like and GRIP domain-containing protein 5/6;RANBP2-like and GRIP domain-containing protein 8;E3 SUMO-protein ligase RanBP2	RGPD3;RGPD8;RGPD5;RANBP2	EDALDDS(0.001)VS(0.023)S(0.137)S(0.162)S(0.688)VHAS(0.984)PLAS(0.703)S(0.302)PVRK	S2246	25.5114	25.5428	25.558	25.7088	24.6135	25.7745
P49792	RanBP2-like and GRIP domain-containing protein 3;E3 SUMO-protein ligase RanBP2	RGPD3;RANBP2	S(0.001)Y(0.001)KY(0.141)S(0.858)PKT(0.998)PPR	S796	23.6203	23.1115	23.4169	24.1641	22.8037	21.2413
A6NMQ3	Alpha-endosulfine	ENSA	S(1)QKQEEENPAEETGEEKQDTQEK	S2	23.5404	23.8307	24.4624	24.9045	23.512	23.2112
A6NMQ3	Alpha-endosulfine;cAMP-regulated phosphoprotein 19	ENSA;ARPP19	YFDS(1)GDYNMAK	S90	28.2607	28.2942	28.08	28.3925	28.1721	28.618
A6NN50	Obscurin-like protein 1	OBSL1	ASSGDQGS(1)PPCFLR	S10	22.3647	20.9072	23.3373	23.4409	22.8197	22.9815
Q15154	Pericentriolar material 1 protein	PCM1	KAS(1)AQASLASK	S1283	26.7704	26.8655	26.0192	24.4136	25.344	25.0249
Q15154	Pericentriolar material 1 protein	PCM1	ILEDHGS(1)PAGEIDDEDKDKDETETVK	S1730	27.9261	27.3476	27.7058	28.9343	28.1145	27.558
Q15154	Pericentriolar material 1 protein	PCM1	QRINFS(1)DLDQR	S110	25.5181	25.4813	25.6625	26.2113	25.9877	26.1531
Q15154	Pericentriolar material 1 protein	PCM1	INFSDLDQRS(0.999)IGS(0.972)DS(0.029)QGR	S116	21.121	21.1334	22.7673	22.9731	24.0262	22.6934
Q15154	Pericentriolar material 1 protein	PCM1	INFSDLDQRS(0.999)IGS(0.972)DS(0.029)QGR	S119	21.6697	21.4048	22.7673	22.9731	24.0262	22.6934
Q15154	Pericentriolar material 1 protein	PCM1	IQALQT(0.001)ACPDLQLS(0.996)AAS(0.997)VGNCPT(0.007)KK	S779	23.6257	24.3288	24.3171	26.345	26.3351	22.4015
Q15154	Pericentriolar material 1 protein	PCM1	LTIYS(1)EADLR	S1977	22.0491	21.8823	22.1683	22.7485	23.0146	22.5768
Q15154	Pericentriolar material 1 protein	PCM1	WKNNCPFS(1)ADENYRPLAK	S960	24.2119	23.4005	23.8999	25.9764	25.6935	25.3656
Q15154	Pericentriolar material 1 protein	PCM1	NVRS(1)DIS(1)DQEEDEESEGCPVSINLSK	S1765	28.3484	28.8458	28.8864	29.4753	29.7967	29.6435
Q15154	Pericentriolar material 1 protein	PCM1	NVRS(1)DIS(1)DQEEDEESEGCPVSINLSK	S1768	28.9861	29.4054	29.4856	29.4753	29.8812	29.7143
Q15154	Pericentriolar material 1 protein	PCM1	QAES(0.97)LS(0.028)LT(0.002)R	S370	24.8408	24.8707	24.9101	20.8998	24.1633	24.0384
Q15154	Pericentriolar material 1 protein	PCM1	QAES(0.002)LS(0.973)LT(0.025)R	S372	26.2142	25.4944	25.8717	24.792	24.5673	24.3956
Q15154	Pericentriolar material 1 protein	PCM1	RRQFDEES(1)LES(0.991)FS(0.019)S(0.99)MPDPVDPTTVTK	S1257	23.8563	24.9666	24.3672	26.084	25.4923	25.0739
Q15154	Pericentriolar material 1 protein	PCM1	RRQFDEES(1)LES(0.991)FS(0.019)S(0.99)MPDPVDPTTVTK	S1260	23.8563	24.9666	24.3672	26.084	25.4923	25.0739
Q15154	Pericentriolar material 1 protein	PCM1	RRQFDEES(0.98)LES(0.232)FS(0.798)S(0.99)MPDPVDPTTVTK	S1262	22.6028	24.9666	24.3672	26.084	25.4923	25.0739
Q15154	Pericentriolar material 1 protein	PCM1	QGLAETAS(1)PVAVSLR	S861	27.8811	27.4818	27.62	28.2102	27.9303	27.5881
Q15154	Pericentriolar material 1 protein	PCM1	QGLAET(0.212)AS(0.788)PVAVS(1)LRS(0.999)DGS(0.986)ENLCT(0.015)PQQS(0.001)R	S866	25.7173	26.5181	26.0873	27.0876	26.7348	26.6971
Q15154	Pericentriolar material 1 protein	PCM1	RQGLAET(0.161)AS(0.839)PVAVS(1)LRS(1)DGS(0.959)ENLCT(0.041)PQQSR	S869	26.8207	26.9519	26.0873	27.1595	27.2221	27.1706
Q15154	Pericentriolar material 1 protein	PCM1	QGLAET(0.421)AS(0.579)PVAVS(1)LRS(0.999)DGS(0.994)ENLCT(0.007)PQQSR	S872	27.0316	27.1468	26.6561	26.8278	27.4174	27.3171
Q15154	Pericentriolar material 1 protein	PCM1	TGFS(1)VSVEK	S1229	24.0343	23.7092	23.5751	22.4725	21.3899	22.9123
Q15154	Pericentriolar material 1 protein	PCM1	TGFSVS(1)VEK	S1231	24.8326	24.4173	24.6664	24.3306	23.669	22.9505
A6NNN6		PCM1	TGS(1)DFSMFEALR	S1319	23.8036	23.4094	23.3986	24.104	23.3288	23.5594
Q15154	Pericentriolar material 1 protein	PCM1	VTNDIS(1)PES(1)S(1)PGVGR	S65	29.2934	29.2703	29.681	29.2027	29.141	29.0905
Q15154	Pericentriolar material 1 protein	PCM1	VTNDIS(1)PES(1)S(1)PGVGR	S68	28.024	27.7318	27.7455	29.1684	29.0992	28.8414
Q15154	Pericentriolar material 1 protein	PCM1	VTNDIS(1)PES(1)S(1)PGVGR	S69	27.5831	27.8317	27.5692	27.626	27.8192	27.6281
Q15154	Pericentriolar material 1 protein	PCM1	WVSELS(1)YVEEK	S991	24.5414	24.1021	24.4366	25.6292	24.7662	24.1006
Q15154	Pericentriolar material 1 protein	PCM1	YMSQMS(1)VPEQAELEK	S93	26.7943	26.4542	26.2242	25.8725	25.2071	24.8964
A6PVM9	Allograft inflammatory factor 1-like	AIF1L	ANES(0.127)S(0.873)PKPVGPPPER	S78	24.0286	21.1253	23.7618	24.5413	23.7991	23.1486
A8MQ02	Afadin	MLLT4	S(0.414)S(0.586)PNVANQPPS(1)PGGK	S1141	26.807	27.5438	26.7451	26.8463	26.9841	27.2175
A8MQ02	Afadin	MLLT4	DYEPPS(0.993)PS(0.007)PAPGAPPPPPQR	S1653	24.7774	24.5907	25.0537	24.4762	24.5865	24.898
A8MQ02	Afadin	MLLT4	LFS(0.999)QGQDVS(0.001)NK	S1756	22.7995	21.0313	21.3885	23.4011	22.458	22.6303
A8MQ02	Afadin	MLLT4	QGAIYHGLATLLNQPS(1)PMMQR	S1066	27.1044	26.4502	26.4425	26.3156	26.4408	25.9237
A8MQ02	Afadin	MLLT4	SQDADS(1)PGSSGAPENLTFK	S1736	25.7025	25.4646	25.664	26.5007	25.6613	25.262
A8MQ02	Afadin	MLLT4	TIS(1)NPEVVMK	S175	24.8782	24.2979	24.6291	26.6188	26.199	25.6623
A8MQ02	Afadin	MLLT4	TSS(1)VVTLEVAK	S1042	26.9435	27.0567	26.7016	27.1842	27.1805	27.2104
A8MT19	Putative rhophilin-2-like protein RHPN2P1;Rhophilin-2	RHPN2P1;RHPN2	S(0.008)AS(0.778)T(0.215)LCLPSVGAARPQVK	S551	21.3261	22.2388	22.3889	23.1914	22.8202	23.6327
A8MUA9	Small ubiquitin-related modifier 4;Small ubiquitin-related modifier 2;Small ubiquitin-related modifier 3	SUMO3;SUMO4;SUMO2	VAGQDGS(1)VVQFK	S27	21.6298	23.8022	24.1958	23.7689	23.6642	23.2918
H7BY10	60S ribosomal protein L23a	RPL23A	IRT(0.033)S(0.967)PT(0.001)FR	S45	29.5795	28.9777	28.6834	28.9994	28.8214	21.0747
F8WBU8	Tetratricopeptide repeat protein 38	TTC38	AAAS(1)PLRDCQAWKDAR	S5	24.1168	22.5379	23.2641	22.7373	23.2716	24.1292
A9Z1X7	Serine/arginine repetitive matrix protein 1	SRRM1	KAAS(1)PS(1)PQS(1)VR	S747	29.7181	29.5727	29.3964	29.5444	29.6486	28.7451
A9Z1X7	Serine/arginine repetitive matrix protein 1	SRRM1	KAAS(1)PS(1)PQS(1)VR	S749	27.6772	29.2907	27.7234	27.0137	27.284	27.0366
A9Z1X7	Serine/arginine repetitive matrix protein 1	SRRM1	KAAS(1)PS(1)PQS(1)VR	S752	25.4725	25.1532	25.3066	22.4821	25.5099	25.5183
A9Z1X7	Serine/arginine repetitive matrix protein 1	SRRM1	AKS(1)PT(1)PS(1)PS(1)PPR	S800	24.8494	25.2225	25.0265	24.4365	24.1398	23.4193
A9Z1X7	Serine/arginine repetitive matrix protein 1	SRRM1	AKS(1)PT(1)PS(1)PS(1)PPR	S804	24.8494	25.2225	25.0265	24.4365	24.1398	23.4193
A9Z1X7	Serine/arginine repetitive matrix protein 1	SRRM1	AKS(1)PT(1)PS(1)PS(1)PPR	S806	24.8494	25.2225	25.0265	24.4365	24.1398	23.4193
A9Z1X7	Serine/arginine repetitive matrix protein 1	SRRM1	APQT(0.002)S(0.998)S(0.894)S(0.106)PPPVR	S703	26.6683	26.6642	26.4541	26.3947	26.6713	26.6861
A9Z1X7	Serine/arginine repetitive matrix protein 1	SRRM1	EARS(1)PQPNK	S684	21.1641	20.6382	21.3602	20.862	19.6106	22.1093
A9Z1X7	Serine/arginine repetitive matrix protein 1	SRRM1	RES(1)PS(1)PAPKPR	S445	26.7219	25.0275	25.293	23.0255	26.0123	23.2353
A9Z1X7	Serine/arginine repetitive matrix protein 1	SRRM1	RES(1)PS(1)PAPKPR	S447	26.5697	24.614	25.0702	21.5192	25.7334	22.8813
A9Z1X7	Serine/arginine repetitive matrix protein 1	SRRM1	KET(1)ES(1)EAEDNLDDLEKHLR	S883	31.0968	31.0367	31.2188	31.7382	31.4517	31.0783
A9Z1X7	Serine/arginine repetitive matrix protein 1	SRRM1	HRPS(1)PPAT(1)PPPK	S397	27.4283	27.2187	27.5147	27.6398	27.0193	26.9761
A9Z1X7	Serine/arginine repetitive matrix protein 1	SRRM1	KPPAPPS(1)PVQS(0.001)QS(0.996)PS(0.002)TNWSPAVPVK	S778	28.8811	28.7841	28.877	29.1105	29.1298	28.7294
A9Z1X7	Serine/arginine repetitive matrix protein 1	SRRM1	KPPAPPS(1)PVQSQS(0.999)PSTNWSPAVPVK	S784	28.8811	28.5383	28.7094	28.958	28.9916	28.6932
A9Z1X7	Serine/arginine repetitive matrix protein 1	SRRM1	KPPAPPS(1)PVQS(0.013)QS(0.978)PS(0.009)T(0.001)NWS(1)PAVPVK	S790	27.4419	27.1372	27.2374	27.6605	27.6843	27.2782
A9Z1X7	Serine/arginine repetitive matrix protein 1	SRRM1	VS(1)VS(0.969)PGRT(0.015)S(0.017)GK	S424	27.1439	27.4122	27.1891	27.9281	27.5784	27.5105
A9Z1X7	Serine/arginine repetitive matrix protein 1	SRRM1	VSVS(1)PGR	S426	29.1958	29.153	29.0846	28.813	28.2076	28.1308
A9Z1X7	Serine/arginine repetitive matrix protein 1	SRRM1	VELS(1)ES(1)EEDKGGK	S458	28.3347	27.4647	26.6802	26.9956	26.8756	23.9398
A9Z1X7	Serine/arginine repetitive matrix protein 1	SRRM1	VELS(1)ES(1)EEDKGGK	S460	23.7309	23.52	28.4267	24.8892	24.2266	23.9398
A9Z1X7	Serine/arginine repetitive matrix protein 1	SRRM1	QS(1)PS(1)PSTRPIR	S722	25.9975	26.6319	26.2316	26.5731	28.2375	26.529
A9Z1X7	Serine/arginine repetitive matrix protein 1	SRRM1	QS(1)PS(1)PSTRPIR	S724	25.9975	26.6319	26.2316	26.5731	26.3065	26.529
A9Z1X7	Serine/arginine repetitive matrix protein 1	SRRM1	RAS(1)PS(1)PPPKR	S635	24.4037	23.9632	24.2341	23.9013	23.4658	22.9202
A9Z1X7	Serine/arginine repetitive matrix protein 1	SRRM1	RAS(1)PS(1)PPPKR	S637	24.4037	23.9632	24.2341	23.9013	23.4658	22.9202
A9Z1X7	Serine/arginine repetitive matrix protein 1	SRRM1	RHS(1)PS(1)PRPR	S692	25.3971	25.5303	25.018	24.3643	25.0489	25.1989
A9Z1X7	Serine/arginine repetitive matrix protein 1	SRRM1	RHS(1)PS(1)PRPR	S694	25.2011	25.3755	25.018	24.3643	25.0489	25.1989
A9Z1X7	Serine/arginine repetitive matrix protein 1	SRRM1	RLS(1)PS(1)AS(1)PPR	S384	31.6561	31.4969	31.962	31.9804	31.6993	31.4198
A9Z1X7	Serine/arginine repetitive matrix protein 1	SRRM1	RLS(1)PS(1)AS(1)PPR	S386	29.9566	30.1227	30.4945	31.3012	31.6993	30.8153
A9Z1X7	Serine/arginine repetitive matrix protein 1	SRRM1	RLS(1)PS(1)AS(1)PPR	S388	31.6561	31.4969	31.962	31.9804	30.8396	31.4198
A9Z1X7	Serine/arginine repetitive matrix protein 1	SRRM1	RRS(1)PS(0.967)LS(0.031)S(0.001)K	S662	27.8978	27.9146	27.6315	26.7437	27.4632	26.3508
A9Z1X7	Serine/arginine repetitive matrix protein 1	SRRM1	RRS(1)PS(0.984)LS(0.016)SK	S664	27.2485	27.1539	26.8598	26.0334	26.8319	22.4123
A9Z1X7	Serine/arginine repetitive matrix protein 1	SRRM1	S(1)PS(1)PAPPPRR	S569	25.8545	25.48	25.2556	25.6521	25.3479	24.6143
A9Z1X7	Serine/arginine repetitive matrix protein 1	SRRM1	S(1)PS(1)PAPPPRR	S571	25.8545	25.48	25.2556	25.6521	25.3479	24.6143
A9Z1X7	Serine/arginine repetitive matrix protein 1	SRRM1	T(1)AS(1)PPPPPKR	S625	29.0363	28.7784	29.2414	28.4669	28.3697	27.9867
A9Z1X7	Serine/arginine repetitive matrix protein 1	SRRM1	RRT(1)PS(1)PPPR	S592	29.5388	29.1842	29.0219	28.7045	28.9321	28.7383
A9Z1X7	Serine/arginine repetitive matrix protein 1	SRRM1	RVS(1)HS(1)PPPKQR	S645	25.9483	25.9775	24.0728	25.7597	26.0571	24.3263
A9Z1X7	Serine/arginine repetitive matrix protein 1	SRRM1	RVS(1)HS(1)PPPKQR	S647	26.2886	26.2556	24.7742	25.9852	26.1471	24.6853
A9Z1X7	Serine/arginine repetitive matrix protein 1	SRRM1	RVS(1)RT(1)PEPK	S734	26.3806	26.2637	25.6745	27.7754	26.0511	25.8429
A9Z1X7	Serine/arginine repetitive matrix protein 1	SRRM1	RVS(0.893)S(0.686)S(0.687)RS(0.579)VS(0.127)GS(0.029)PEPAAK	S757	25.3741	25.1706	22.9135	24.1132	24.8252	23.6323
A9Z1X7	Serine/arginine repetitive matrix protein 1	SRRM1	S(0.997)VS(0.009)GS(0.994)PEPAAK	S761	26.6968	26.5305	25.7955	24.1132	25.7739	24.4599
A9Z1X7	Serine/arginine repetitive matrix protein 1	SRRM1	RVS(0.564)S(0.389)S(0.079)RS(0.968)VS(1)GS(1)PEPAAK	S763	27.0532	27.0428	27.7249	25.8568	26.8252	25.1477
A9Z1X7	Serine/arginine repetitive matrix protein 1	SRRM1	RVS(0.564)S(0.389)S(0.079)RS(0.968)VS(1)GS(1)PEPAAK	S765	27.3703	26.6992	26.8165	26.5922	27.1893	21.2984
A9Z1X7		SRRM1	WQS(1)PVTK	S547	30.0666	30.0285	30.3316	30.0508	30.0009	29.9706
A9Z1X7	Serine/arginine repetitive matrix protein 1	SRRM1	RYS(1)PPIQR	S606	30.5492	30.34	30.5908	30.8274	30.1911	30.3215
A9Z1X7	Serine/arginine repetitive matrix protein 1	SRRM1	RYS(1)PS(1)PPPK	S614	28.6787	28.4717	27.8339	28.8888	27.9513	28.2347
A9Z1X7	Serine/arginine repetitive matrix protein 1	SRRM1	RYS(1)PS(1)PPPK	S616	28.6787	28.4717	27.8339	28.8888	27.9513	28.2347
A9Z1X7	Serine/arginine repetitive matrix protein 1	SRRM1	S(1)PS(0.999)PPPT(0.001)RR	S558	24.3154	21.7684	23.665	24.2808	23.5736	23.1938
A9Z1X7	Serine/arginine repetitive matrix protein 1	SRRM1	S(1)PS(0.999)PPPT(0.001)RR	S560	24.3154	20.3825	23.665	24.2808	23.5736	23.1938
A9Z1X7	Serine/arginine repetitive matrix protein 1	SRRM1	TRHS(0.997)PT(0.003)PQQSNR	S409	25.8847	25.6046	25.6195	25.2049	25.7524	26.4715
A9Z1X7	Serine/arginine repetitive matrix protein 1	SRRM1	VPKPEPIPEPKEPS(1)PEK	S260	22.9176	21.4375	24.0839	27.1097	24.0563	24.8401
B0QY67	SUN domain-containing protein 2	SUN2	RGT(0.981)GGS(0.878)ES(0.596)S(0.596)RAS(0.948)GLVGR	S110	22.0667	23.6036	23.5431	24.5031	24.5052	24.5561
B0QY67	SUN domain-containing protein 2	SUN2	RGT(0.981)GGS(0.878)ES(0.596)S(0.596)RAS(0.948)GLVGR	S116	22.1744	23.6036	23.5431	24.5031	24.5052	24.5561
B0QY95	Mitochondrial dynamics protein MID51	MIEF1	AIS(1)APT(0.338)S(0.592)PT(0.07)R	S55	27.5522	27.2807	27.2104	27.3323	27.267	26.7411
B0QY95	Mitochondrial dynamics protein MID51	MIEF1	S(0.986)LQT(0.014)LPTDSSTFDTDTFCPPRPKPVAR	S94	26.3841	24.8602	25.2651	24.697	24.9513	24.6947
B0QY95	Mitochondrial dynamics protein MID51	MIEF1	SWEEPNWMGS(1)PR	S79	21.5852	21.7237	22.2961	23.1571	23.3709	22.0635
F8WBN8	Coiled-coil domain-containing protein 117	CCDC117	AVPS(0.034)S(0.921)PAGS(0.046)AAR	S53	25.224	25.0047	25.0622	24.7802	24.8144	24.7688
B0YIW6	Coatomer subunit delta	ARCN1	VTQVDGNS(1)PVR	S534	23.1363	22.9232	21.8038	23.663	22.5379	23.3543
F5H7V1	Nardilysin	NRD1	RGS(0.998)LS(0.002)NAGDPEIVK	S94	28.7272	28.3471	28.506	29.9137	28.3548	28.4839
F5H7V1	Nardilysin	NRD1	LGADES(1)EEEGRR	S86	24.1981	24.8776	24.6889	25.1	25.0659	24.9576
B1AKN3	Arginine-glutamic acid dipeptide repeats protein	RERE	VAS(0.991)DT(0.009)EEADRTSSK	S388	23.652	23.5825	23.6487	24.086	24.0732	23.558
B1AKN3	Arginine-glutamic acid dipeptide repeats protein	RERE	TQEIS(0.995)RPNS(0.996)PS(0.008)EGEGESSDSR	S407	24.808	24.117	24.8519	24.3397	24.6746	24.9522
B1AKN3	Arginine-glutamic acid dipeptide repeats protein	RERE	TQEIS(0.995)RPNS(0.996)PS(0.008)EGEGESSDSR	S411	24.808	24.117	24.5247	23.7916	23.9121	24.3236
S4R3W2	Nuclear factor 1;Nuclear factor 1 A-type	NFIA	SVEDEMDS(1)PGEEPFYTGQGR	S54	24.9038	25.1504	24.6479	24.2404	23.4851	23.7656
E7EUY6	Rho guanine nucleotide exchange factor 7;Rho guanine nucleotide exchange factor 6	ARHGEF7;ARHGEF6	MS(1)GFIYQGKLPTTGMTITK	S340	25.7369	25.5672	25.4185	25.9949	25.3858	25.4258
E7EUY6	Rho guanine nucleotide exchange factor 7	ARHGEF7	SGTLKS(1)PPKGFDTTAINK	S79	25.242	24.8597	25.112	22.8679	22.6887	24.8456
B1ALM5	Transmembrane protein 9	TMEM9	S(1)MAAAAASLGGPR	S140	24.8871	24.5955	24.8002	25.7629	25.8196	25.6727
B1AMY1	TNF receptor-associated factor 2	TRAF2	AAASVT(1)PPGS(1)LELLQPGFSK	S11	26.9676	26.6764	28.2776	27.4584	26.1337	27.0073
E5RHT1	Presenilin;Presenilin-2;Presenilin-2 NTF subunit;Presenilin-2 CTF subunit	PSEN2	TSLMSAES(0.874)PT(0.125)PR	S25	24.69	24.1864	24.6796	24.2975	24.2478	23.7338
B1AUU8	Epidermal growth factor receptor substrate 15	EPS15	AAAAQLS(1)LTQLSSGNPVYEK	S8	23.8031	25.0922	24.1496	21.3393	23.382	21.9586
B1AUU8	Epidermal growth factor receptor substrate 15	EPS15	S(1)INKLDS(1)PDPFK	S662	25.9194	25.3681	25.7111	25.6513	24.7051	24.532
B1AUU8	Epidermal growth factor receptor substrate 15	EPS15	S(0.001)INKLDS(0.999)PDPFKLNDPFQPFPGNDS(1)PK	S680	23.309	24.3709	24.5259	24.3715	24.2852	23.3641
B1AUU8	Epidermal growth factor receptor substrate 15	EPS15	NIIGS(0.195)S(0.805)PVADFSAIK	S324	22.4748	23.4994	22.1768	23.7735	22.7148	22.1121
B1AUU8	Epidermal growth factor receptor substrate 15	EPS15	SATSS(0.046)S(0.892)VS(0.062)NVVITK	S612	24.389	21.847	24.0112	23.6485	23.7994	23.3199
B1AUU8	Epidermal growth factor receptor substrate 15	EPS15	S(1)INKLDS(1)PDPFK	S656	22.4424	23.4526	23.8092	24.403	23.418	23.1992
B1AVT0	Dual specificity protein kinase CLK2	CLK2	AKS(1)VEDDAEGHLIYHVGDWLQER	S140	22.7775	22.2655	23.2431	22.6273	22.7509	21.5899
H7BXF4	Sphingomyelin phosphodiesterase 4	SMPD4	ASIQECILPDS(0.999)PLY(0.001)HNK	S169	23.6384	23.6583	22.9084	22.1468	23.4221	23.2442
H7BXF4	Sphingomyelin phosphodiesterase 4	SMPD4	HLLS(1)PVGRR	S763	21.9195	24.0296	23.8459	24.025	24.2361	23.7317
B2RBV5		LOC93622	EEPGS(1)PLS(1)PAPR	S18	23.2852	23.3677	24.6241	23.4256	23.5705	24.1562
B2RBV5		LOC93622	EEPGS(1)PLS(1)PAPR	S21	23.2852	23.3677	23.2922	23.4256	22.7823	23.2301
H3BS66	Small integral membrane protein 1	SMIM1	DGVS(1)LGAVS(0.816)S(0.154)T(0.03)EEASR	S22	28.748	28.4536	28.6811	29.4488	28.4633	28.5222
H3BS66	Small integral membrane protein 1	SMIM1	WEDGS(0.069)RDGVS(0.931)LGAVS(0.942)S(0.046)T(0.012)EEASR	S27	28.7085	28.4536	28.6623	29.4333	28.4478	28.5222
F5H672	Iron-sulfur cluster assembly enzyme ISCU, mitochondrial	ISCU	RAAS(1)ALLLR	S14	26.2079	25.9906	25.7781	26.2119	26.1689	26.0704
F5H672	Iron-sulfur cluster assembly enzyme ISCU, mitochondrial	ISCU	ELS(1)APAR	S29	26.6484	26.8371	26.4556	26.9025	26.8728	27.4649
B3KT28	FAS-associated factor 1	FAF1	T(0.003)PS(0.997)GEFLER	S388	25.141	25.129	25.2247	25.7297	25.4066	25.224
B3KV94	Lysine-specific demethylase 5B	KDM5B	DGINS(1)LER	S1247	21.9386	21.314	21.8742	22.043	21.7572	20.9214
B3KVN2	Protein farnesyltransferase/geranylgeranyltransferase type-1 subunit alpha	FNTA	HST(0.001)ENDS(0.983)PT(0.016)NVQQ	S222	24.3552	25.1635	24.6091	23.5736	24.0184	23.7974
B3KXX3	Solute carrier family 12 member 6	SLC12A6	LTSIGS(1)DEDEETETYQEK	S844	24.7585	24.5291	24.7572	25.0022	24.4119	23.9892
B3KXX3	Solute carrier family 12 member 6	SLC12A6	VS(0.002)S(0.998)LLNR	S9	24.6224	23.9848	20.6545	23.6303	23.7398	24.0191
H0Y5J4	Drebrin-like protein	DBNL	AMS(0.998)T(0.002)TSISSPQPGK	S198	27.0139	26.3532	26.961	25.0116	25.2166	24.8656
H0Y5J4	Drebrin-like protein	DBNL	AMSTTS(0.001)IS(0.014)S(0.986)PQPGKLR	S204	25.4701	26.4368	26.6148	25.4858	25.5048	25.982
H0Y5J4	Drebrin-like protein	DBNL	LRS(1)PFLQK	S212	25.3695	24.9571	25.8534	21.337	26.059	24.0632
B4DDD6		DBNL	YQEQGGEAS(0.945)PQS(0.055)R	S207	23.4045	23.0539	22.9758	21.8257	21.4241	21.7772
B4DFB6	DENN domain-containing protein 5A	DENND5A	FNS(1)YDISR	S169	22.9835	23.0917	23.2676	23.1296	21.7475	20.6878
B4DFG0	Protein DEK	DEK	S(1)LIVEGKR	S51	22.644	22.1693	22.4331	25.1533	23.5652	23.2369
G8JLH2	M-phase inducer phosphatase 2	CDC25B	FQS(1)MPVR	S87	21.7198	21.7425	21.4748	23.0463	23.3568	23.2447
G8JLH2	M-phase inducer phosphatase 2	CDC25B	MEVEELS(1)PLALGR	S185	20.951	21.078	21.7958	22.6935	22.0829	20.554
G8JLH2	M-phase inducer phosphatase 2	CDC25B	S(0.866)VT(0.134)PPEEQQEAEEPK	S262	20.4459	23.7098	23.9049	24.1989	23.2691	23.978
C9JUN4	Phosphoribosyl pyrophosphate synthase-associated protein 1	PRPSAP1	LGLAVIHGEAQCT(0.076)ELDMDDGRHS(0.924)PPMVK	S141	23.9969	23.1922	23.3324	21.7603	23.3565	21.8803
B4DP81	Centrosomal protein of 76 kDa	CEP76	ELNFVTDSVEQELPS(0.17)S(0.83)PKQPICFDR	S83	22.8055	23.9439	24.6882	25.0048	24.1211	21.043
B4DQA8	Golgi SNAP receptor complex member 1	GOSR1	RDS(0.991)S(0.009)DTTPLLNGSSQDR	S49	24.5282	24.3806	23.2297	23.0497	20.7786	23.4653
B4DR80		STK24	AHS(1)PVQSGLPGMQNLK	S4	26.9437	26.8138	26.5538	26.9264	26.008	25.9139
B4DT96	Nucleoporin-like protein 2	NUPL2	EGFGLSENPFAS(0.015)LS(0.985)PDEQKDEK	S106	25.4109	24.2995	21.8542	24.4986	24.1939	22.98
B4E349	N6-adenosine-methyltransferase 70 kDa subunit	METTL3	NPEAALS(0.777)PT(0.223)FR	S43	25.3584	24.4539	24.655	25.6333	24.6677	24.1695
B4DTS2	Serine/threonine-protein kinase;Serine/threonine-protein kinase D2	PRKD2	AQS(0.034)S(0.966)LGYIPLMR	S375	21.211	21.1715	22.3792	22.4235	22.4197	21.4585
I3L3C6	Brain-specific angiogenesis inhibitor 1-associated protein 2	BAIAP2	SLS(1)PPQSQSK	S6	24.8178	25.4024	24.8967	25.382	25.5144	25.6087
I3L3C6	Brain-specific angiogenesis inhibitor 1-associated protein 2	BAIAP2	SSS(1)MAAGLER	S48	27.9066	27.3037	27.8938	28.2511	28.4348	28.0167
E7EU85	Fragile X mental retardation syndrome-related protein 1	FXR1	RGPNYTSGYGTNS(0.002)ELS(0.998)NPS(0.92)ET(0.074)ES(0.007)ER	S321	22.5809	22.3951	22.0081	24.8331	23.5005	23.3052
B4DY08	Heterogeneous nuclear ribonucleoproteins C1/C2	HNRNPC	AS(0.978)NVT(0.006)NKT(0.016)DPR	S3	24.8587	23.9388	20.9561	23.9159	24.2397	24.3784
B4DY08	Heterogeneous nuclear ribonucleoproteins C1/C2	HNRNPC	MYS(1)YPAR	S125	25.7301	25.0415	25.5325	24.0863	23.7132	23.7211
B4DY08	Heterogeneous nuclear ribonucleoproteins C1/C2	HNRNPC	NDKS(1)EEEQSSSSVK	S220	24.269	23.8132	24.1385	26.2298	23.2928	23.6216
B4DY08		HNRNPC	SAAEMYGS(0.995)S(0.005)FDLDYDFQR	S107	23.994	23.9107	22.6012	26.2724	24.8533	24.2717
Q8NBY1	Serine/threonine-protein kinase 26	STK26	AHS(1)PVAVQVPGMQNNIADPEELFTKLER	S4	20.9901	24.3016	24.3672	25.0573	24.1431	23.1691
B4E1M0	Myb/SANT-like DNA-binding domain-containing protein 2	MSANTD2	GAS(1)PLGPGSAAGSGAAASGGLGLGLGGR	S48	22.9729	23.378	21.2516	23.4392	23.1976	22.9193
B4E1Q4	Serine/threonine-protein kinase RIO3	RIOK3	VSIS(1)FENYR	S96	21.1534	21.2914	21.916	22.4142	23.044	22.8303
B5MBX0	Sororin	CDCA5	APS(0.996)PT(0.004)KPLR	S21	23.7911	23.9481	23.9435	24.8009	24.797	20.745
B5MBX0	Sororin	CDCA5	IVAHAVEVPAVQS(1)PRRS(1)PR	S75	25.9894	25.0885	25.7539	25.7757	26.6284	25.0338
B5MBX0	Sororin	CDCA5	IVAHAVEVPAVQS(1)PRRS(1)PR	S79	25.2418	24.1006	24.0699	22.8492	25.3744	21.6795
B5MBX0	Sororin	CDCA5	SCFGFEGLLGAEDLS(0.031)GVS(0.967)PVVCS(0.002)K	S181	23.6985	24.1511	23.5425	21.573	28.4591	21.1926
B5MBZ0	Echinoderm microtubule-associated protein-like 4	EML4	AS(0.96)PS(0.04)PQPSSQPLQIHR	S144	23.2912	22.7274	20.342	24.978	24.2344	23.7706
B5MBZ0	Echinoderm microtubule-associated protein-like 4	EML4	SIKRPS(1)PAEK	S176	24.2567	23.5508	23.8556	22.204	23.0888	23.5266
C9JRC4	Protein phosphatase 1 regulatory subunit 7	PPP1R7	GAGQQQS(1)QEMMEVDR	S12	23.7646	23.2395	23.464	24.9277	24.7895	21.3022
B5MC51	LIM domain kinase 2	LIMK2	SNS(0.999)IS(0.001)KSPGPSSPKEPLLFSR	S211	24.6846	21.5894	24.3528	23.1991	23.5349	23.4197
B5MCN7	Nuclear receptor coactivator 1	NCOA1	VNPSVNPS(0.001)IS(0.999)PAHGVAR	S244	24.6642	24.556	24.1631	23.7875	23.5857	23.6185
H7C0E9	R3H domain-containing protein 2	R3HDM2	AS(0.002)S(0.998)FSGISILTR	S114	21.5947	20.8338	22.3211	22.4059	21.9047	21.701
H7C2Y0	Septin-2	2019-09-02	IYHLPDAES(1)DEDEDFKEQTR	S73	23.5621	24.0649	23.0065	24.5841	23.897	21.159
Q99613	Eukaryotic translation initiation factor 3 subunit C;Eukaryotic translation initiation factor 3 subunit C-like protein	EIF3C;EIF3CL	QNPEQS(1)ADEDAEK	S166	23.2654	23.27	21.5352	23.8309	23.5709	23.3124
Q99613	Eukaryotic translation initiation factor 3 subunit C;Eukaryotic translation initiation factor 3 subunit C-like protein	EIF3C;EIF3CL	QPLLLS(1)EDEEDTK	S39	26.4333	26.1692	26.442	26.8934	26.706	26.245
B7WNQ9	Erythroid transcription factor	GATA1	EDS(1)PPQAVEDLDGK	S116	23.5307	23.5426	24.0853	25.1453	24.3102	23.8978
B7WPG3	Heterogeneous nuclear ribonucleoprotein L-like	HNRNPLL;HNRPLL	LKTEEGEIDYS(1)AEEGENRR	S35	22.3029	25.1381	25.1855	26.4457	26.2657	21.5876
B7Z3B9	GRB2-associated-binding protein 1	GAB1	TASDTDSSYCIPT(0.011)AGMS(0.94)PS(0.049)R	S278	24.0091	23.5853	23.6165	24.0224	23.4545	23.1776
B7Z4K4	Putative tRNA (cytidine(32)/guanosine(34)-2'-O)-methyltransferase	FTSJ1	VDTFPQPLAAPQCHTLLAPEMEDNEMS(0.04)CS(0.96)P	S191	23.8812	24.5539	24.0987	24.6264	24.9843	24.0317
B7Z4M1	Reticulon;Reticulon-3	RTN3	AEPSAATQSHSISSSSFGAEPS(0.011)APGGGGS(0.989)PGACPALGTK	S30	28.0411	27.3274	27.6568	28.0085	27.7445	28.1067
F8W052	Tastin	TROAP	GVS(0.998)PT(0.001)PSKIPVR	S16	26.4379	25.8328	26.1457	24.805	24.7355	24.081
F8W052	Tastin	TROAP	NPLEELRPS(1)PR	S98	23.7057	23.4428	22.5744	22.5383	22.6392	22.7268
B7Z7F3	Ran-binding protein 3	RANBP3	T(0.006)S(0.006)S(0.987)LTQFPPSQSEER	S58	24.7219	25.212	24.4623	24.028	25.4152	25.1288
B7Z7F3	Ran-binding protein 3	RANBP3	SAGGSSPEGGEDS(1)DREDGNYCPPVKR	S40	27.3683	26.9422	27.2178	27.2927	26.7098	27.5339
B7Z7F3	Ran-binding protein 3	RANBP3	VLS(1)PPKLNEVSSDANR	S260	26.2802	25.6334	26.0355	27.1223	25.6411	26.3015
B7Z8J4	Glycylpeptide N-tetradecanoyltransferase 1	NMT1	GGLS(1)PANDTGAKK	S47	30.5389	30.8977	30.4385	30.6799	30.5162	30.9998
B7Z8J4	Glycylpeptide N-tetradecanoyltransferase 1	NMT1	GSETDSAQDQPVKMNS(1)LPAER	S83	24.49	23.5296	24.3283	22.9044	20.5906	22.1625
F8WF16	Periphilin-1	PPHLN1	DNTFFRES(1)PVGR	S85	29.0445	28.791	28.8606	29.6374	29.7441	29.5214
F8WF16	Periphilin-1	PPHLN1	DT(0.008)S(0.992)PSSGSAVSSSK	S138	25.8866	25.2941	24.7434	24.8379	25.2276	25.3493
B7ZBM3	Forkhead box protein P4	FOXP4	MTGS(0.987)PT(0.013)LVK	S542	24.4764	24.951	24.6841	24.3919	24.6306	24.0112
B7ZBM3	Forkhead box protein P4	FOXP4	QFLLQQASGLS(0.013)S(0.987)PGNNDSK	S86	24.9761	24.8771	25.1984	21.4032	23.7687	24.1504
E5RJM0	Cytoplasmic polyadenylation element-binding protein 4	CPEB4	QQLS(0.999)PS(0.001)PGQEAGILPETEK	S97	24.2788	24.2978	24.6737	25.4269	24.5208	23.8424
B8ZZ08	Putative RNA-binding protein Luc7-like 1	LUC7L	RS(1)EEKEAGEI	S162	26.3832	26.8806	26.2754	27.6728	26.9609	27.1289
B8ZZ51	Malate dehydrogenase, cytoplasmic	MDH1	KLS(0.957)S(0.03)AMS(0.013)AAK	S76	24.5139	23.6545	24.3871	24.404	23.9417	24.0923
B8ZZ81	Alkyldihydroxyacetonephosphate synthase, peroxisomal	AGPS	AAS(0.954)AAT(0.046)AAPTATPAAQESGTIPK	S65	22.8034	21.9934	22.61	23.102	22.5387	22.3498
B8ZZ81	Alkyldihydroxyacetonephosphate synthase, peroxisomal	AGPS	VLS(1)GHLLGRPR	S42	26.9681	26.8657	26.8141	26.2587	26.6851	26.6088
H7BZ50	Mitotic-spindle organizing protein 2B;Mitotic-spindle organizing protein 2A	MZT2B;MZT2A	QPS(0.926)AT(0.074)RLPK	S102	26.828	20.9986	26.4892	26.7141	26.8385	27.1299
B8ZZ98	U4/U6.U5 small nuclear ribonucleoprotein 27 kDa protein	SNRNP27	S(0.663)T(0.338)S(0.999)PS(0.937)PS(0.063)RLK	S61	25.8874	25.9306	25.6857	26.1536	25.8241	25.6427
B8ZZ98	U4/U6.U5 small nuclear ribonucleoprotein 27 kDa protein	SNRNP27	S(0.663)T(0.338)S(0.999)PS(0.937)PS(0.063)RLK	S63	25.8874	25.9306	25.6857	26.1536	25.8241	25.6427
B8ZZJ0	Small ubiquitin-related modifier 1	SUMO1	S(1)DQEAKPSTEDLGDKK	S2	24.8496	24.713	25.1269	26.2193	25.1861	25.4941
B8ZZQ6	Prothymosin alpha;Prothymosin alpha, N-terminally processed;Thymosin alpha-1	PTMA	S(1)DAAVDTSSEITTK	S2	31.2178	31.1818	31.0132	31.3643	31.383	31.1693
B8ZZQ6	Prothymosin alpha;Prothymosin alpha, N-terminally processed;Thymosin alpha-1	PTMA	S(0.005)DAAVDT(0.692)S(0.833)S(0.404)EIT(0.051)T(0.014)K	S9	24.6772	29.218	29.4023	29.3236	29.441	29.3368
H0Y4C5	NGFI-A-binding protein 1	NAB1	RLS(1)AGLYR	S148	23.4448	23.0773	23.0373	23.5287	23.8671	23.4047
B8ZZS4	Ankyrin repeat and zinc finger domain-containing protein 1	ANKZF1	EALGQNEES(1)PK	S188	22.7614	23.0726	22.8581	23.6767	22.8159	22.868
B8ZZS4	Ankyrin repeat and zinc finger domain-containing protein 1	ANKZF1	VLSLLSAPLGS(0.999)GGFT(0.001)LLHAAAAAGR	S323	24.4352	23.3687	23.949	24.3176	23.9989	24.0408
B8ZZX6	Metalloreductase STEAP3	STEAP3	PEEMDKPLISLHLVDS(1)DS(0.532)S(0.468)LAKVPDEAPK	S17	22.2484	21.2901	22.7423	24.4333	24.1634	23.6193
F8WC91	U4/U6.U5 tri-snRNP-associated protein 2	USP39	EVDEDS(1)EPEREVR	S82	25.0122	23.9377	24.9298	24.071	24.7825	24.532
B9EGE7	Zinc finger protein 507	ZNF507	AQQCVS(0.825)PS(0.115)S(0.043)S(0.016)LCR	S195	22.9454	22.6795	20.5956	24.372	23.7534	23.867
B9EGQ5	Protein Wiz	WIZ	S(0.995)PS(0.005)DLHISPLAK	S308	22.3219	23.1788	24.4218	24.0019	22.1359	21.9871
B9EGQ5	Protein Wiz	WIZ	SPSDLHIS(1)PLAK	S315	24.6781	24.3288	24.9018	25.1873	24.4463	24.6924
B9EGQ5	Protein Wiz	WIZ	NPEDKS(0.976)PQLS(0.061)LS(0.082)PRPAS(0.88)PK	S187	24.936	25.1421	25.3101	23.7556	23.0602	24.8563
B9EGQ5	Protein Wiz	WIZ	NPEDKSPQLS(0.003)LS(0.997)PRPAS(1)PK	S193	26.6535	26.5816	26.6992	22.2804	26.2591	24.2695
B9EGQ5	Protein Wiz	WIZ	NPEDKS(0.004)PQLS(0.203)LS(0.794)PRPAS(1)PK	S198	27.2924	26.5816	27.0646	26.8514	27.4429	27.3608
B9EGQ5	Protein Wiz	WIZ	PGGPPNPPGPS(1)PK	S287	23.7275	23.5882	23.7783	23.5193	21.7938	22.2783
B9EGQ5	Protein Wiz	WIZ	TPLALAGS(0.947)PT(0.053)PK	S177	25.5959	25.443	25.5194	26.3713	25.1094	25.0192
E3W974		DNPEP	S(0.049)GHS(0.912)PT(0.039)RGAMQVAMNGK	S5	23.8577	22.7129	24.1666	21.9848	24.4942	23.1541
Q9NRI2	Translin-associated protein X	TRAX;DISC1;TSNAX	DVNSS(0.001)S(0.999)PVMLAFK	S33	21.5418	22.2426	20.8978	23.7743	22.8323	22.3697
C9J3R1	Zinc finger protein 639	ZNF639	NQNYLVPS(1)PVLR	S88	23.6221	23.557	23.2784	23.4134	23.3232	23.2565
C9JG35	Zinc finger protein 668	ZNF668	MEVEAAEARS(1)PAPGYKR	S10	24.4402	21.4777	23.8277	24.1297	24.3375	23.7101
C9J0A7	Charged multivesicular body protein 2b	CHMP2B	ATIS(1)DEEIER	S169	28.2716	27.9901	28.0367	28.6113	28.5134	28.4531
C9J0I9	Nuclear-interacting partner of ALK	ZC3HC1	NWGAVVRS(1)PEGT(1)PQKIR	S24	26.2619	26.5475	26.7593	25.5078	26.2697	23.642
C9J0I9	Nuclear-interacting partner of ALK	ZC3HC1	DT(0.004)S(0.004)AT(0.033)S(0.163)QS(0.844)VNGS(0.95)PQAEQPSLESTSK	S58	21.4852	25.5003	21.8044	25.369	25.022	24.8208
C9J0I9	Nuclear-interacting partner of ALK	ZC3HC1	DTSATSQSVNGS(1)PQAEQPSLESTSK	S62	26.2271	26.6221	25.7795	26.5262	26.8398	26.5314
C9J0I9	Nuclear-interacting partner of ALK	ZC3HC1	LPLVPES(1)PRR	S278	26.3357	25.7916	25.9087	27.1151	26.2325	26.3093
C9J0I9	Nuclear-interacting partner of ALK	ZC3HC1	SMGTGDTPGLEVPS(0.897)S(0.103)PLR	S351	28.0292	22.0748	27.6007	27.8196	27.8346	27.8946
C9J0I9	Nuclear-interacting partner of ALK	ZC3HC1	SMGTGDTPGLEVPS(0.148)S(0.852)PLRK	S352	25.2094	24.1911	24.223	23.2083	24.922	24.2847
C9J0I9	Nuclear-interacting partner of ALK	ZC3HC1	SQDATFS(1)PGSEQAEK	S292	29.9103	30.2443	30.3419	30.1768	30.0293	29.8246
C9J0I9	Nuclear-interacting partner of ALK	ZC3HC1	SQDAT(0.011)FS(0.989)PGS(1)EQAEKS(0.999)PGPIVS(0.001)R	S295	23.7816	23.9815	23.911	29.3939	23.8431	23.3249
C9J0I9	Nuclear-interacting partner of ALK	ZC3HC1	SQDATFS(0.988)PGS(0.012)EQAEKS(1)PGPIVSR	S301	29.9354	30.012	30.2193	29.9111	29.84	29.7973
C9J0I9	Nuclear-interacting partner of ALK	ZC3HC1	T(0.1)RS(0.895)WDS(0.02)S(0.018)S(0.017)PVDRPEPEAAS(0.851)PT(0.067)T(0.031)R	S311	26.636	21.5654	26.1669	27.0714	26.8312	26.16
C9J0I9	Nuclear-interacting partner of ALK	ZC3HC1	SWDS(0.001)S(0.047)S(0.952)PVDRPEPEAASPTTR	S316	27.7545	27.5054	27.4977	28.0107	27.7305	28.5847
C9J0I9	Nuclear-interacting partner of ALK	ZC3HC1	SWDS(0.001)S(0.001)S(0.001)PVDRPEPEAAS(0.96)PT(0.03)T(0.007)R	S327	28.3544	27.9966	28.2109	28.5181	28.3263	28.0729
C9JE98	Nuclear receptor corepressor 2	NCOR2	ANAS(1)PQKPLDLK	S938	25.79	25.923	25.8694	25.3196	25.4104	25.3926
C9JE98	Nuclear receptor corepressor 2	NCOR2	EKT(0.022)DDT(0.98)S(0.998)GEDNDEKEAVASK	S553	21.4223	21.4208	24.0217	24.4928	24.5068	24.4104
C9JE98	Nuclear receptor corepressor 2	NCOR2	IIGEDS(0.998)PS(0.002)RLDR	S1241	25.8547	25.582	25.8197	25.7689	25.5263	25.7393
C9JE98	Nuclear receptor corepressor 2	NCOR2	LLS(0.999)PRPS(0.745)LLT(0.238)PT(0.018)GDPR	S921	25.594	25.0871	25.1018	24.6004	24.8544	24.6573
C9JE98	Nuclear receptor corepressor 2	NCOR2	MGS(0.004)KS(0.995)PGNTS(0.001)QPPAFFSK	S2248	23.3382	23.4912	23.4811	23.7533	23.7789	23.7827
C9JE98	Nuclear receptor corepressor 2	NCOR2	QVMNMWS(1)EQEK	S432	23.5023	22.0279	23.289	24.7225	23.6989	23.6401
C9JE98	Nuclear receptor corepressor 2	NCOR2	SLIGS(1)PGR	S1469	23.8414	23.6593	23.7176	24.0373	23.4275	23.4109
C9JE98	Nuclear receptor corepressor 2	NCOR2	SLTGKLEPVS(1)PPS(0.992)PPHT(0.008)DPELELVPPR	S149	23.3677	23.0236	23.3339	23.2437	21.2805	23.332
C9JE98	Nuclear receptor corepressor 2	NCOR2	SLTGKLEPVS(1)PPS(0.992)PPHT(0.008)DPELELVPPR	S152	23.3677	23.0236	23.3339	23.2437	20.8568	23.332
C9J0V9	Zinc finger protein 655	ZNF655	MEEIPAQEAAGS(1)PR	S12	25.2931	24.8631	25.1784	25.189	25.3757	25.225
C9J185	Eukaryotic translation initiation factor 2-alpha kinase 3	EIF2AK3	EHIEIIAPS(1)PQR	S594	21.8027	21.5829	22.0567	21.3742	21.4947	19.9554
D6RBD7	Eukaryotic translation elongation factor 1 epsilon-1	EEF1E1;EEF1E1-BLOC1S5	AAAAELS(1)LLEK	S8	23.1826	23.0375	22.5088	22.9885	22.8597	23.146
C9JS59	E3 ubiquitin-protein ligase RNF123	RNF123	PGWLS(0.002)S(0.998)PTLGR	S675	23.2832	23.8213	24.0979	25.7435	25.0943	24.3122
C9J3D4		ZNF660	VLTEGSDQES(0.999)EKDNSQC	S27	25.3543	21.3501	24.9482	24.5866	24.9529	25.0134
C9J3E3	Phosphatidylinositide phosphatase SAC1	SACM1L	LSNT(0.001)S(0.052)PEFQEMS(0.947)LLERADQR	S96	25.7955	24.0947	25.2408	24.5908	25.0972	23.6294
C9JZP1	Condensin complex subunit 2	NCAPH	LLAS(1)PSSR	S87	27.316	27.1804	27.3471	26.5121	22.0075	26.2855
C9JZP1	Condensin complex subunit 2	NCAPH	VFDLQFS(0.006)T(0.036)DS(0.959)PR	S81	26.2986	25.4745	25.465	25.338	25.2936	25.2415
C9J4K0	Ashwin	C2orf49	KS(0.995)PS(0.007)GPVKS(0.998)PPLS(0.905)PVGT(0.045)T(0.05)PVK	S140	25.2751	25.0837	24.8362	26.6596	25.2112	25.0453
C9J4K0	Ashwin	C2orf49	SPSGPVKS(1)PPLS(0.991)PVGT(0.008)T(0.001)PVK	S147	28.6612	28.1899	28.1219	28.9434	28.4567	27.9606
C9J4K0	Ashwin	C2orf49	SPSGPVKS(1)PPLS(0.999)PVGT(0.001)TPVK	S151	28.6612	28.1899	28.1219	28.978	28.4567	27.9606
F8WC22	Protein downstream neighbor of Son	DONSON	ALSVPGYS(1)PGFR	S9	21.3563	23.1026	21.7205	24.0974	23.9873	21.908
C9J4Z5	Histone-lysine N-methyltransferase 2C	KMT2C	EQS(1)AEEDAEAEVDNSK	S90	23.2575	23.4354	21.1099	25.2979	23.4381	23.2476
C9J4Z5	Histone-lysine N-methyltransferase 2C	KMT2C	S(0.031)VS(0.969)EESANSLVSVGVEAK	S114	24.3572	23.8288	23.7766	23.6406	23.3203	23.7834
C9J542	PDZ and LIM domain protein 4	PDLIM4	IHIDPEIQDGS(0.977)PT(0.016)T(0.005)S(0.002)R	S53	26.5727	25.7372	26.0754	27.7488	27.3872	27.0261
E9PNJ7	Nucleosome assembly protein 1-like 4	NAP1L4	ADHS(1)FS(1)DGVPSDSVEAAK	S5	29.3912	29.1417	29.4235	29.9559	29.8366	29.3983
E9PNJ7	Nucleosome assembly protein 1-like 4	NAP1L4	REFITGDVEPTDAESEWHS(1)ENEEEEK	S125	26.1336	25.3288	25.8093	26.9814	26.1107	25.3008
C9J6P4	Zinc finger CCCH-type antiviral protein 1	ZC3HAV1	AS(1)LEDAPVDDLTR	S284	25.5016	25.2477	25.1482	25.9417	24.5445	24.9632
C9J6P4	Zinc finger CCCH-type antiviral protein 1	ZC3HAV1	FLENGS(1)QEDLLHGNPGSTYLASNSTSAPNWK	S335	26.1984	26.0475	26.4073	26.1256	26.462	25.738
C9J6P4	Zinc finger CCCH-type antiviral protein 1	ZC3HAV1	KFTYLGS(1)QDR	S302	22.7478	22.1998	22.4729	22.376	21.7971	21.5123
C9J6P4	Zinc finger CCCH-type antiviral protein 1	ZC3HAV1	TVFS(1)PTLPAAR	S378	25.0693	24.8954	24.4957	25.0086	25.0748	24.7829
C9J6P4	Zinc finger CCCH-type antiviral protein 1	ZC3HAV1	S(0.001)CT(0.999)PS(1)PDQISHR	S275	28.6914	28.3517	28.4706	28.5031	28.3298	28.3423
C9J713	Serine/Arginine-related protein 53	RSRC1	LMGS(1)PVA	S280	25.2621	24.3938	25.1011	24.89	24.985	24.4045
C9J7L6	Actin-related protein 8	ACTR8	RIPVS(1)PEQAR	S21	25.5474	25.0425	24.8864	24.5664	25.5074	25.0293
H7BZL0	MKI67 FHA domain-interacting nucleolar phosphoprotein	NIFK	TVDS(1)QGPT(1)PVCT(0.87)PT(0.13)FLER	S39	25.0955	26.1624	25.7613	25.5143	25.7556	24.1367
C9J8Y8		MSH6	RLELAVCDEPS(1)EPEEEEEMEVGTTY	S101	25.0965	25.4514	25.3049	25.3057	25.1798	25.0108
P52701	DNA mismatch repair protein Msh6	MSH6	VHVQFFDDS(0.972)PT(0.028)R	S137	26.7779	26.4484	26.494	27.2262	26.8445	26.3843
C9J919	TOX high mobility group box family member 4	TOX4	LS(0.003)T(0.114)T(0.883)PS(0.999)PT(0.376)S(0.332)S(0.293)LHEDGVEDFRR	S155	27.3939	28.0591	28.3471	26.7977	28.0611	27.8236
C9J919	TOX high mobility group box family member 4	TOX4	LS(0.002)T(0.499)T(0.499)PS(0.998)PT(0.011)S(0.043)S(0.947)LHEDGVEDFRR	S159	24.9943	24.0774	27.4904	27.1489	27.1876	27.1285
C9J9G2	PHD finger protein 12	PHF12	TTS(1)PSSDTDLLDR	S131	24.993	24.8471	24.9164	24.7239	24.9562	24.3406
C9J9H5	Mitotic spindle assembly checkpoint protein MAD1	MAD1L1	AILGSYDSELTPAEY(0.002)S(0.994)PQLT(0.005)R	S18	25.4784	25.1964	25.2419	25.9479	25.4257	25.2043
C9J9W2	LIM and SH3 domain protein 1	LASP1	MGPSGGEGMEPERRDS(1)QDGSSYR	S110	25.7885	25.4645	25.6246	25.8029	24.6146	25.7532
C9JA08	60S ribosomal export protein NMD3	NMD3	DSAIPVES(1)DT(1)DDEGAPR	S468	29.4947	29.5517	29.7695	28.6029	28.7651	28.5449
C9JA93		TBC1D15	SLSQS(1)FENLLDEPAYGLIQK	S106	25.9483	25.485	25.9562	21.0591	24.9787	26.0457
C9JAT7	UBX domain-containing protein 7	UBXN7	SES(1)LIDASEDS(1)QLEAAIR	S118	24.1331	25.5287	26.2696	24.966	25.2978	22.8348
C9JAT7	UBX domain-containing protein 7	UBXN7	SES(1)LIDASEDS(1)QLEAAIR	S126	26.5815	25.5287	26.8744	28.1816	25.2978	22.8348
C9JAY7	Autophagy-related protein 16-1	ATG16L1	S(0.994)VS(0.005)SFPVPQDNVDTHPGSGK	S124	24.8246	24.6456	21.2552	24.9121	24.7203	24.9148
C9JMQ7	Solute carrier family 12 member 9	SLC12A9	ASES(0.109)S(0.891)PLLAYR	S6	21.7475	22.3994	22.2618	22.7088	22.3276	22.1421
C9JBX5	Translocon-associated protein subunit alpha	SSR1	VEMGTSSQNDVDMSWIPQETLNQINKAS(1)PR	S200	27.5651	27.8586	27.6553	28.6207	27.9787	27.9395
C9JFC1	Probable inactive tRNA-specific adenosine deaminase-like protein 3	ADAT3	CLEAGS(1)PEPEPAPWQALPVLSEK	S34	23.3749	23.2812	23.2323	23.1079	23.139	20.702
C9JFM5	Syntaxin-4	STX4	AIEPQKEEADENYNS(0.992)VNT(0.008)R	S169	24.0122	21.3208	24.7077	24.3923	24.1306	24.2734
M0R275	RAC-beta serine/threonine-protein kinase	AKT2	CGS(1)PSDSSTTEEMEVAVSK	S37	25.025	25.3707	24.9153	24.9402	24.718	21.1654
C9JIG9	Serine/threonine-protein kinase OSR1	OXSR1	AAISQLRS(1)PR	S359	25.052	24.3594	24.3169	26.1066	24.8613	24.848
C9JIG9	Serine/threonine-protein kinase OSR1	OXSR1	LHKTEDGGWEWS(1)DDEFDEESEEGKAAISQLR	S339	25.9322	26.1249	26.3369	25.0373	25.7005	24.8014
C9JJX6	Armadillo repeat protein deleted in velo-cardio-facial syndrome	ARVCF	GALS(0.999)PGGFDDS(0.001)T(0.001)LPLVDK	S795	21.4214	23.7062	22.9274	22.5561	21.9191	21.1591
H7C019	SUN domain-containing protein 1	SUN1	RPPVLDES(1)WIR	S113	23.0006	22.6904	22.9073	23.9808	23.6264	22.7965
C9JKA9	Kinesin-like protein KIF15	KIF15	QLEHVMDSAAEDPQS(1)PK	S776	22.9974	23.8101	23.4687	25.3999	24.7263	20.8833
C9JPX5	MLN64 N-terminal domain homolog	STARD3NL	LLIVQDAS(1)ER	S193	25.8035	25.8601	25.8163	26.3646	26.6418	26.6181
C9JNL8	Putative tRNA pseudouridine synthase Pus10	PUS10	LQELEDS(1)IDNLSQNGEGR	S79	21.499	23.0653	21.1815	23.1377	23.5347	22.2199
C9JNL8	Putative tRNA pseudouridine synthase Pus10	PUS10	LQELEDSIDNLS(1)QNGEGR	S84	23.6716	23.7023	23.5908	21.7218	21.1716	23.4655
C9JP85	Nuclear respiratory factor 1	NRF1	VGQQAIVLCIS(0.973)PS(0.027)KPNPVFK	S136	24.2397	24.4264	24.4319	24.6542	24.6558	24.3472
C9JQV3	Serine/threonine-protein kinase 11-interacting protein	STK11IP	AKNS(1)PPQAPSTR	S761	25.3327	24.6552	24.8631	24.4011	24.8857	21.5954
C9JQV3	Serine/threonine-protein kinase 11-interacting protein	STK11IP	RAS(0.998)IS(0.972)EPS(0.77)DT(0.26)DPEPR	S387	25.7775	20.1181	24.2978	24.8433	25.7836	25.9902
C9JR56	DNA-binding protein SATB;DNA-binding protein SATB2	SATB2	LEQNGS(1)PMGAR	S39	23.865	25.1469	25.6115	25.0986	25.5722	25.1548
C9JR56	DNA-binding protein SATB;DNA-binding protein SATB2	SATB2	SES(1)PCLR	S7	23.4551	23.877	24.83	25.1042	24.7068	25.3777
C9JR56	DNA-binding protein SATB;DNA-binding protein SATB2	SATB2	S(0.008)ES(0.992)PCLRDS(1)PDRR	S13	21.6077	22.1899	24.2603	24.5487	24.1106	24.7595
C9JR56	DNA-binding protein SATB;DNA-binding protein SATB2	SATB2	S(0.021)GS(0.979)PDVKGPPPVK	S20	26.6082	26.2249	26.9043	26.9365	27.1642	27.3122
C9JRJ5	LIM domain-containing protein 1	LIMD1	EGPLGWSSDGSLGSVLLDS(0.001)PS(0.792)S(0.206)PR	S423	22.9098	24.1042	23.9276	24.6844	25.6993	25.2148
C9JRJ5	LIM domain-containing protein 1	LIMD1	S(0.037)NS(0.963)GLGGEVSGVMSKPNVDPQPWFQDGPK	S316	26.1323	26.3452	25.8579	21.6226	25.3283	25.0662
C9JRJ5	LIM domain-containing protein 1	LIMD1	VS(0.001)PGLPS(0.999)PNLENGAPAVGPVQPR	S277	24.6595	24.69	21.0917	23.4756	23.1719	23.3551
C9JSU1	Leucine-rich repeat flightless-interacting protein 2	LRRFIP2	RGS(0.999)GDT(0.001)SSLIDPDTSLSELR	S96	26.8535	26.9066	26.1423	26.6188	26.6644	26.5176
C9JTT8	BET1 homolog	BET1;DKFZp781C0425	SLS(1)IEIGHEVK	S50	21.6785	23.5553	23.4609	23.2125	23.2256	21.4606
C9JUG7	F-actin-capping protein subunit alpha-2	CAPZA2	ADLEEQLS(1)DEEKVR	S9	25.9673	26.3516	26.3494	26.445	26.5963	26.215
C9JW69	Regulator of chromosome condensation	RCC1	S(1)PPADAIPK	S11	27.4722	27.6743	27.6593	27.0111	27.5657	28.511
C9JWC4	Holliday junction recognition protein	HJURP	EYCLS(1)PR	S363	24.4934	23.9746	24.2017	25.551	25.544	25.3096
C9JWC4	Holliday junction recognition protein	HJURP	GGPAS(1)PGGLQGLETR	S388	20.8248	27.6409	27.7486	28.3743	28.2754	28.1857
C9JWC4	Holliday junction recognition protein	HJURP	WLIS(1)PVK	S327	22.7773	23.269	23.4589	24.7807	24.4628	24.4046
C9JXK0	Lamin-B receptor	LBR	SAS(1)ASHQADIKEAR	S99	28.1518	27.5664	21.7156	25.1721	27.9618	28.0157
C9JYJ6	Filamin A-interacting protein 1-like	FILIP1L	RIS(1)DPQVFSK	S551	23.0531	23.0816	22.0373	23.0765	22.7275	22.9144
E7EVL6	Replication initiator 1	REPIN1	LLSGPSQES(0.998)PQT(0.002)LGK	S27	25.4137	24.6419	25.1568	25.2287	24.6852	23.9142
C9JYS5	Golgi apparatus membrane protein TVP23 homolog;Golgi apparatus membrane protein TVP23 homolog B;Golgi apparatus membrane protein TVP23 homolog C	TVP23C;TVP23B;TVP23C-CDRT4	MLQQDS(0.985)NDDT(0.015)EDVSLFDAEEETTNRPR	S6	21.5981	23.6545	23.508	23.3916	23.1646	23.2561
C9JYS5	Golgi apparatus membrane protein TVP23 homolog;Golgi apparatus membrane protein TVP23 homolog B;Golgi apparatus membrane protein TVP23 homolog C	TVP23C;TVP23B;TVP23C-CDRT4	MLQQDS(0.003)NDDT(0.037)EDVS(0.771)LFDAEEET(0.095)T(0.095)NRPR	S14	23.6725	24.1152	23.364	23.3915	23.3838	22.9737
C9JZR2	Catenin delta-1	CTNND1	GS(1)LAS(0.994)LDS(0.006)LR	S346	22.3056	21.834	21.2029	22.5436	22.4417	22.6025
C9JZR2	Catenin delta-1	CTNND1	GSLAS(1)LDS(1)LRK	S349	22.3852	21.5811	23.2506	24.1661	24.0684	24.4369
C9JZR2	Catenin delta-1	CTNND1	GSLAS(1)LDS(1)LRK	S352	23.6714	22.883	23.5869	24.192	24.4549	24.0592
C9JZR2	Catenin delta-1	CTNND1	VGGS(0.963)S(0.037)VDLHR	S268	25.8446	25.3918	26.0909	27.0082	27.1567	26.3522
C9JZT2	Interferon-induced, double-stranded RNA-activated protein kinase	EIF2AK2	AVS(0.999)PLLLTTTNSSEGLSMGNYIGLINR	S83	23.6191	21.5544	22.6884	22.275	22.6254	22.8278
C9K0K7	Phosphoribosyl pyrophosphate synthase-associated protein 2	PRPSAP2	LGIAVIHGEAQDAESDLVDGRHS(1)PPMVR	S227	28.5849	27.673	27.7227	28.1413	28.3724	28.3554
H0Y3P2	Eukaryotic translation initiation factor 4 gamma 2	EIF4G2	FS(1)PTMGR	S395	23.8371	22.9821	23.3641	25.7176	24.9547	24.5108
D3DTX6	Neurabin-2	PPP1R9B	FNGST(0.001)EALDKLDADAVS(0.969)PT(0.028)VS(0.001)QLSAVFEK	S205	24.5442	24.1505	24.6137	24.9189	24.6033	24.5442
K7EJY2	Ankyrin repeat and SAM domain-containing protein 3	ANKS3	DVTS(1)PINER	S114	24.2581	24.6099	24.9376	25.1268	25.0446	25.2251
D6REJ6	PACRG-like protein	PACRGL	SSLST(0.003)S(0.063)S(0.87)PES(0.063)AR	S47	21.2572	25.4124	25.072	26.1191	26.3663	26.1135
D6R9D4	Mothers against decapentaplegic homolog 5	SMAD5	TSMASLFS(0.001)FT(0.044)S(0.955)PAVKR	S12	23.238	22.7424	22.9827	21.6348	21.1455	22.2091
D6R9G1	Cyclin-dependent kinase 7	CDK7	EQS(1)NPALAIK	S228	22.7793	22.5422	22.6202	23.0367	22.2097	21.9241
D6R9G1	Cyclin-dependent kinase 7	CDK7	SFGS(1)PNR	S71	28.7955	28.4422	27.9644	26.2409	28.0647	27.4852
D6RDY9		SLC35B1	LELSPPPPLLPVPVVS(0.023)GS(0.792)PVGS(0.08)S(0.105)GR	S29	24.1345	23.9101	24.2083	23.397	21.4692	23.7129
D6R9K7	RNA-binding protein 4	RBM4	LHVGNIS(0.994)PT(0.006)CTNK	S86	25.2155	25.4632	25.7327	25.8694	25.1615	25.4745
D6R9P3	Heterogeneous nuclear ribonucleoprotein A/B	HNRNPAB	EVYQQQQYGS(1)GGR	S242	25.8362	25.26	26.1468	24.1001	23.6815	24.0783
D6R9S4	Centromere protein U	CENPU;MLF1IP	RS(0.002)S(0.998)DT(0.02)S(0.98)GNEASEIESVK	S79	22.7427	24.9609	25.1878	23.822	23.3044	24.277
D6R9S4	Centromere protein U	CENPU;MLF1IP	RS(0.002)S(0.998)DT(0.02)S(0.98)GNEASEIESVK	S82	22.7427	24.9609	22.793	25.3068	23.3044	25.179
D6R9T3	Embryonic stem cell-specific 5-hydroxymethylcytosine-binding protein	HMCES	MLQWLATKS(1)PK	S247	22.0157	21.7885	22.1597	22.3589	21.7623	22.2436
D6RI08	OCIA domain-containing protein 1	OCIAD1	LENS(1)PLGEALR	S54	28.2018	28.1246	28.1895	28.5613	28.5567	28.4858
D6RI08	OCIA domain-containing protein 1	OCIAD1	RS(0.107)S(0.893)PPGHYYQK	S69	24.7635	24.9028	24.4017	24.1389	24.9683	25.0097
H0Y9K3	La-related protein 1B	LARP1B	IGS(1)PLS(1)PK	S309	24.4601	24.0759	21.8197	24.6263	24.3214	24.0673
H0Y9K3	La-related protein 1B	LARP1B	IGS(1)PLS(1)PK	S312	24.1982	24.3144	21.8524	24.9209	24.595	24.3189
H0Y9K3	La-related protein 1B	LARP1B	LNGPGENVS(1)EDEAQSSNQR	S29	25.7359	25.5964	25.6376	26.8696	26.1923	26.4452
D6RAA8		CAST	S(1)DQALEALSASLGTR	S2	22.1796	21.2234	21.8288	23.2985	23.1848	23.2271
D6RAF2	Poly(A) RNA polymerase GLD2	PAPD4	AVSLQQLTYGNVS(0.998)PIQT(0.001)SASPLFR	S62	22.8376	23.456	24.2956	22.1274	22.5062	22.7262
D6RAF8	Heterogeneous nuclear ribonucleoprotein D0	HNRNPD	IDASKNEEDEGHS(0.999)NS(0.241)S(0.759)PR	S80	26.1566	26.5941	26.6043	26.8583	26.9448	26.1455
D6RAF8	Heterogeneous nuclear ribonucleoprotein D0	HNRNPD	IDASKNEEDEGHSNS(0.023)S(0.977)PR	S83	27.1039	26.1971	27.2925	27.6044	25.5166	24.9929
D6RAF8	Heterogeneous nuclear ribonucleoprotein D0	HNRNPD	IFVGGLS(1)PDT(1)PEEK	S190	25.7219	25.0234	25.2651	24.7458	24.5996	24.6963
D6RAU6	F-box only protein 4	FBXO4	S(0.038)GT(0.038)NS(0.923)PPPPFSDWGR	S12	22.0764	21.0309	22.7986	23.88	23.2015	22.8306
D6RAU6	F-box only protein 4	FBXO4	T(0.032)T(0.032)S(0.935)REEVDEAASTLTR	S48	25.4131	22.1996	21.407	21.7651	21.937	21.7144
D6RAM3	Docking protein 3	DOK3	ATS(1)LPSLDTPGELR	S274	29.8629	29.2792	29.643	29.6092	29.3514	29.2291
D6RAT0	40S ribosomal protein S3a	RPS3A	ADGYEPPVQES(1)V	S226	27.3097	27.3485	27.4794	27.6167	27.4746	27.2383
D6RAT0	40S ribosomal protein S3a	RPS3A	LMELHGEGS(0.953)S(0.045)S(0.002)GK	S199	24.9927	24.6515	24.8503	22.1464	24.6715	24.9373
D6RAW2	ADP-ribose pyrophosphatase, mitochondrial	NUDT9	WADPQISES(0.008)NFS(0.992)PK	S71	24.2295	21.5516	22.1525	23.9156	23.6112	23.4735
D6RAY8	SWI/SNF-related matrix-associated actin-dependent regulator of chromatin subfamily A containing DEAD/H box 1	SMARCAD1	ANT(1)PDS(0.99)DIT(0.01)EK	S57	24.7139	25.0296	24.8129	25.5137	25.1524	25.2259
D6RAY8	SWI/SNF-related matrix-associated actin-dependent regulator of chromatin subfamily A containing DEAD/H box 1	SMARCAD1	TFNKDTVIIVS(1)EPS(1)EDEES(1)QGLPTMAR	S124	24.8335	25.0332	24.3142	26.9245	25.63	24.7805
D6RAY8	SWI/SNF-related matrix-associated actin-dependent regulator of chromatin subfamily A containing DEAD/H box 1	SMARCAD1	TFNKDTVIIVS(1)EPS(1)EDEES(1)QGLPTMAR	S127	24.8335	25.0332	24.3142	26.9245	25.63	24.7805
D6RAY8	SWI/SNF-related matrix-associated actin-dependent regulator of chromatin subfamily A containing DEAD/H box 1	SMARCAD1	TFNKDTVIIVS(1)EPS(1)EDEES(1)QGLPTMAR	S132	25.3207	25.5189	23.7324	26.2523	25.5451	24.179
D6RAY8	SWI/SNF-related matrix-associated actin-dependent regulator of chromatin subfamily A containing DEAD/H box 1	SMARCAD1	GIQYIDLS(0.861)S(0.861)DS(0.278)EDVVSPNCSNTVQEK	S95	25.9399	26.4774	26.495	26.5157	26.6154	26.3402
D6RAY8	SWI/SNF-related matrix-associated actin-dependent regulator of chromatin subfamily A containing DEAD/H box 1	SMARCAD1	GIQYIDLS(0.861)S(0.861)DS(0.278)EDVVSPNCSNTVQEK	S96	25.9399	26.4774	26.495	26.5157	26.6154	26.3402
D6RAY8	SWI/SNF-related matrix-associated actin-dependent regulator of chromatin subfamily A containing DEAD/H box 1	SMARCAD1	KAS(1)ISYFK	S79	26.6568	26.743	26.383	24.9979	25.1367	24.9449
D6RAY8	SWI/SNF-related matrix-associated actin-dependent regulator of chromatin subfamily A containing DEAD/H box 1	SMARCAD1	KLS(1)S(0.939)S(0.057)S(0.004)EPYEEDEFNDDQSIKK	S211	25.9759	27.6237	27.8974	27.4826	27.5167	27.3188
D6RAY8	SWI/SNF-related matrix-associated actin-dependent regulator of chromatin subfamily A containing DEAD/H box 1	SMARCAD1	KLS(0.999)S(0.951)S(0.046)S(0.004)EPYEEDEFNDDQSIKK	S212	25.9759	25.5651	25.9322	25.7389	26.1698	25.3494
D6RAY8	SWI/SNF-related matrix-associated actin-dependent regulator of chromatin subfamily A containing DEAD/H box 1	SMARCAD1	KLS(0.846)S(0.15)S(0.013)S(0.991)EPYEEDEFNDDQSIKK	S214	25.0922	24.7424	24.988	24.8684	22.2042	25.333
D6RAY8	SWI/SNF-related matrix-associated actin-dependent regulator of chromatin subfamily A containing DEAD/H box 1	SMARCAD1	RNDDIS(1)ELEDLS(1)ELEDLKDAK	S146	23.9314	24.9459	25.2389	26.741	26.2424	24.7315
D6RAY8	SWI/SNF-related matrix-associated actin-dependent regulator of chromatin subfamily A containing DEAD/H box 1	SMARCAD1	RNDDIS(1)ELEDLS(1)ELEDLKDAK	S152	24.7155	25.5149	25.8171	27.1394	26.4008	24.565
D6RAY8	SWI/SNF-related matrix-associated actin-dependent regulator of chromatin subfamily A containing DEAD/H box 1	SMARCAD1	NKIEEAPEATPQPS(0.008)QPGPS(0.184)S(0.824)PIS(0.988)LS(0.995)AEEENAEGEVS(0.001)R	S34	24.5972	25.7867	24.3126	27.1292	26.5406	25.9111
D6RAY8	SWI/SNF-related matrix-associated actin-dependent regulator of chromatin subfamily A containing DEAD/H box 1	SMARCAD1	NKIEEAPEATPQPSQPGPS(0.467)S(0.537)PIS(0.997)LS(0.999)AEEENAEGEVSR	S37	24.5972	24.6455	24.3126	25.6407	24.8883	23.8877
D6RAY8	SWI/SNF-related matrix-associated actin-dependent regulator of chromatin subfamily A containing DEAD/H box 1	SMARCAD1	NKIEEAPEATPQPSQPGPS(0.467)S(0.537)PIS(0.997)LS(0.999)AEEENAEGEVSR	S39	21.6453	25.7867	25.5977	27.1292	26.5406	25.9111
D6RBP0	Sodium channel and clathrin linker 1	SCLT1	KAAS(1)LMNLENI	S277	22.1964	23.1498	23.1602	22.5907	22.8181	22.7218
D6RC77	Phosphoacetylglucosamine mutase	PGM3	STIGVMVTAS(1)HNPEEDNGVK	S92	27.675	27.9864	27.8777	27.4459	27.0139	27.5698
D6RCP9	Deoxycytidine kinase	DCK	WCNVQSTQDEFEELT(0.001)MS(0.999)QK	S74	24.7703	25.121	25.3152	24.7139	24.4473	24.7409
D6RDH4	Adenylate kinase isoenzyme 6	TAF9;AK6	WIEQWIKDHNS(1)	S141	22.8882	22.094	22.6628	22.2334	21.9129	22.0992
D6REL5	BRCA1-A complex subunit Abraxas	FAM175A	GFGEY(0.346)S(0.815)RS(0.812)PT(0.027)F	S355	22.2434	23.061	22.6806	22.3803	21.8418	21.2526
D6REL5	BRCA1-A complex subunit Abraxas	FAM175A	GFGEYS(0.011)RS(0.982)PT(0.007)F	S357	26.0562	26.0417	25.9626	26.4313	26.2775	26.0518
D6REX3	Protein transport protein Sec31A	SEC31A	AQGEPVAGHES(1)PK	S799	27.9313	28.1156	28.3168	28.7586	28.2635	28.5687
D6REX3	Protein transport protein Sec31A	SEC31A	DSDQVAQS(0.995)DGEES(0.005)PAAEEQLLGEHIKEEK	S527	22.3938	22.1318	21.7901	24.1218	22.9491	23.3657
D6REX3	Protein transport protein Sec31A	SEC31A	EQTLS(1)PTITSGLHNIAR	S1194	27.2401	26.6206	26.6391	26.6248	26.7814	26.8376
D6RGI7	Probable ATP-dependent RNA helicase DDX41	DDX41	TDEVPAGGS(1)RS(1)EAEDEDDEDYVPYVPLR	S21	27.4077	27.1915	27.074	27.8625	27.2165	27.5119
D6RGI7	Probable ATP-dependent RNA helicase DDX41	DDX41	S(1)EAEDEDDEDYVPYVPLR	S23	28.1404	26.469	27.857	27.6273	27.2165	27.17
D6RIY6	Exosome complex component RRP45	EXOSC9	APIDT(0.01)S(0.99)DVEEK	S290	27.9649	21.3939	27.3712	29.2873	28.0213	27.7533
D6RIY6	Exosome complex component RRP45	EXOSC9	MDTGVEVSDIGSQDAPIILS(1)DS(1)EEEEMIILEPDKNPK	S376	23.6245	24.1749	24.298	25.2206	24.9543	24.3323
D6RIY6	Exosome complex component RRP45	EXOSC9	MDTGVEVSDIGSQDAPIILS(1)DS(1)EEEEMIILEPDKNPK	S378	23.6245	24.1749	24.298	25.2206	24.9543	24.3323
E7EQY4	Metastasis-associated protein MTA3	MTA3	LS(0.001)PS(0.978)PT(0.016)T(0.005)EDPR	S429	26.3791	25.6732	26.3445	24.4155	24.6924	23.5925
E1P5H9	Solute carrier organic anion transporter family member 4A1	SLCO4A1	ASPGTPLS(0.048)PGS(0.951)LR	S43	25.3246	24.9499	25.1468	24.0931	24.4533	24.5141
E3W994	CLIP-associating protein 2	CLASP2	AS(0.007)S(0.993)LPGSLQR	S360	22.0654	21.8257	21.9611	23.3692	23.6147	23.1052
E3W994	CLIP-associating protein 2	CLASP2	EAS(0.961)PS(0.038)RLS(0.001)VAR	S507	26.8006	26.6266	27.0764	24.4458	25.7602	25.3124
E3W994	CLIP-associating protein 2	CLASP2	GVTEAIQNFS(1)FR	S931	23.3187	23.538	23.4056	23.6935	23.928	23.5145
E3W994	CLIP-associating protein 2	CLASP2	S(0.005)RS(0.995)DIDVNAAAGAK	S370	28.4709	21.1172	28.7492	28.4335	28.3984	27.9655
E3W994	CLIP-associating protein 2	CLASP2	SSS(0.002)S(0.012)S(0.986)QESLNRPFSSK	S327	25.1205	21.8363	25.3104	25.3135	25.6479	25.1556
E5RFF3	Zinc finger transcription factor Trps1	TRPS1	GS(1)GVFCANCLTTK	S646	22.423	22.716	22.7786	22.3485	23.243	22.6802
E5RFF3	Zinc finger transcription factor Trps1	TRPS1	HPNY(0.065)S(0.939)PPGS(0.996)PIEK	S835	23.1772	23.1639	23.3668	23.789	21.9272	23.2637
E5RFF3	Zinc finger transcription factor Trps1	TRPS1	HPNY(0.065)S(0.939)PPGS(0.996)PIEK	S839	23.1772	23.1639	23.3668	23.789	22.4157	23.2637
E5RFF3	Zinc finger transcription factor Trps1	TRPS1	SKTDLLVNDNPDPAPLS(1)PELQDFK	S170	24.2602	21.5335	21.4248	23.2571	23.4751	23.5628
E5RFJ5	Telomeric repeat-binding factor 1	TERF1	AEDVS(0.003)S(0.997)AAPS(1)PR	S11	27.1692	26.8488	25.4562	27.4548	27.5636	27.1064
E5RJ10	Vacuolar protein sorting-associated protein 37A	VPS37A	SASSSAAGS(1)PGGLTSLQQQK	S18	23.863	23.5304	23.8741	23.7395	23.4156	23.2587
E5RGB3	Tripartite motif-containing protein 35	TRIM35	MERS(1)PDVS(0.99)PGPS(0.01)R	S4	22.816	21.1234	22.5816	22.9078	22.8722	21.7051
E5RGB3	Tripartite motif-containing protein 35	TRIM35	MERS(1)PDVS(0.99)PGPS(0.01)R	S8	22.816	21.1234	22.5816	22.9078	22.8722	22.036
P16949	Stathmin;Stathmin-2	STMN2;STMN1	DLS(1)LEEIQKK	S46	27.3396	27.0749	27.3353	26.2205	26.3387	26.4273
E5RHA3	Glutamate-rich protein 1	ERICH1	ARQEEGADAS(1)EEDPTPAGEEDVKDAR	S160	27.1407	26.803	25.8381	26.4904	28.2451	21.1299
E5RHA3	Glutamate-rich protein 1	ERICH1	EEDGADAS(1)EEDLTR	S144	27.8573	27.7945	27.8412	28.136	27.8958	27.9509
E5RHN2	G1/S-specific cyclin-E2	CCNE2	QQPQPSQTES(1)PQEAQIIQAK	S21	24.7961	24.4937	24.7646	25.757	25.7438	25.3049
P06748	Nucleophosmin	NPM1	CGSGPVHISGQHLVAVEEDAES(1)EDEEEEDVKLLSISGK	S125	31.2141	30.8179	31.5761	31.1358	30.8571	30.7917
P06748	Nucleophosmin	NPM1	LLS(1)IS(1)GKR	S137	29.5626	29.0928	28.9987	29.1898	29.0328	28.7005
P06748	Nucleophosmin	NPM1	LLS(1)IS(1)GKR	S139	28.3612	28.3638	28.3832	27.5442	27.7142	27.4648
E5RI98		NPM1	NYEGS(1)PIKVTLATLK	S6	22.7435	22.4106	22.4209	22.8142	22.7067	23.2346
E5RI99	60S ribosomal protein L30	RPL30	S(1)LESINSR	S10	25.5368	25.6878	24.9344	25.7459	25.8348	25.9765
E5RIM3	Phospholipase A-2-activating protein	PLAA	LWAPDS(1)PNR	S50	24.5937	24.1655	24.6679	24.6583	24.6669	24.3408
E7EMN6	Protein phosphatase inhibitor 2-like protein 3;Protein phosphatase inhibitor 2	PPP1R2;PPP1R2P3	YRIQEQES(1)S(1)GEEDSDLSPEER	S95	26.0604	25.9695	26.9374	25.4526	26.5819	20.4342
E7EMN6	Protein phosphatase inhibitor 2-like protein 3;Protein phosphatase inhibitor 2	PPP1R2;PPP1R2P3	YRIQEQES(1)S(1)GEEDSDLSPEER	S96	27.0779	26.4097	26.4825	26.2353	26.9786	24.5019
E7EMW7	E3 ubiquitin-protein ligase UBR5	UBR5	RIS(1)QSQPVR	S1543	28.542	28.4381	28.4913	28.6799	28.8298	28.5696
F5H3K2	Uncharacterized protein C12orf43	C12orf43	EAAVSASDILQESAIHS(0.96)PGT(0.039)VEK	S134	23.4404	22.9749	23.0483	21.9666	23.3892	23.5924
F5H3K2	Uncharacterized protein C12orf43	C12orf43	EKEES(1)PQPR	S92	21.6892	21.7057	21.614	20.2947	20.6236	20.6541
E7EPB1	Methylcytosine dioxygenase TET2	TET2	TVS(1)EPSLSGLLQIK	S99	22.8911	22.2294	22.6024	23.8038	23.2331	23.1775
E9PDR5	Inhibitor of Bruton tyrosine kinase	IBTK	DLQS(1)PDFTTGFHSDKIEAK	S844	26.2759	25.9619	25.7922	26.4826	26.8259	26.4784
G3V1Q4	Septin-7	2019-09-07	GQLT(0.002)KS(0.998)PLAQMEEERR	S298	23.6534	23.0085	23.2959	24.1687	23.8531	22.3419
E7EPN9	Protein PRRC2C	PRRC2C	AAGS(0.997)PS(0.002)S(0.002)SDQDEKLPGQDESTAGTSEQNDILK	S189	26.3076	28.416	25.9434	28.1547	28.3782	27.0297
E7EPN9	Protein PRRC2C	PRRC2C	AAGS(0.677)PS(0.279)S(0.191)S(0.854)DQDEKLPGQDESTAGTSEQNDILK	S193	26.3076	21.4559	25.9434	26.9533	27.1069	27.0297
E7EPN9	Protein PRRC2C	PRRC2C	LPDLS(1)PVENK	S2107	27.1008	27.1065	27.119	26.4484	25.737	25.614
E7EPN9	Protein PRRC2C	PRRC2C	KAWENS(1)PNVR	S2262	24.3178	24.1379	20.4242	23.5691	23.2561	22.5694
E7EPN9	Protein PRRC2C	PRRC2C	DQMEGS(1)PNSSESFEHIAR	S781	26.0553	26.1388	26.1968	24.9141	25.2016	25.1898
E7EPN9	Protein PRRC2C	PRRC2C	LGILEKQPS(1)PEEIRER	S502	22.617	22.3537	22.2753	23.2646	22.0181	22.1901
E7EPN9	Protein PRRC2C	PRRC2C	ST(0.001)T(0.999)PT(0.001)S(0.098)S(0.901)PFR	S2688	26.0364	25.7697	25.8015	25.648	24.7389	20.9019
J3KN87	Serine/threonine-protein kinase Chk1	CHEK1	HIQS(0.001)NLDFS(0.999)PVNSASSEENVK	S301	24.7937	24.6063	21.8184	25.3171	24.7952	25.1633
H7C3L4	TRAF family member-associated NF-kappa-B activator	TANK	S(0.999)LGS(0.001)PLLHER	S17	23.7003	20.5652	22.7689	23.7532	24.4426	24.2778
E7EQI7	WASH complex subunit strumpellin	KIAA0196	TLMNAVS(1)PLK	S769	22.9379	21.7589	22.6852	22.7414	22.4496	22.6993
E9PGG1		DYNC1I2	EAEALLQSMGLTPESPIVPPPMS(0.821)PS(0.073)S(0.106)K	S81	28.733	28.9922	29.277	28.6543	28.4654	28.1756
E9PGG1	Cytoplasmic dynein 1 intermediate chain 2	DYNC1I2	SVS(0.003)T(0.012)PS(0.985)EAGSQDSGDGAVGSR	S91	23.9837	23.9818	24.3759	24.1429	23.3529	24.1272
E9PCM6	Rho GTPase-activating protein 4	ARHGAP4	GPGAPAS(0.968)PS(0.014)AS(0.018)HPQGLDTTPKPH	S752	26.9956	26.5049	25.1126	26.0931	25.6112	25.9936
E9PCM6	Rho GTPase-activating protein 4	ARHGAP4	QGLGPASTT(0.001)S(0.001)PS(0.003)PGPRS(0.996)PK	S728	24.6409	24.2037	24.0802	25.272	24.5853	24.3147
E7EQR4	Ezrin	EZR	QLLTLS(0.047)S(0.846)ELS(0.107)QAR	S536	23.237	22.0199	21.5196	21.3292	21.1173	21.8064
S4R3H4	Apoptotic chromatin condensation inducer in the nucleus	ACIN1	AES(1)PAEKVPEESVLPLVQK	S432	24.5119	23.9251	24.0283	25.897	24.4889	21.0331
S4R3H4	Apoptotic chromatin condensation inducer in the nucleus	ACIN1	ASLVALPEQT(0.001)AS(0.991)EEET(0.008)PPPLLTK	S352	25.8053	25.6401	25.0869	26.5351	27.1554	25.9806
S4R3H4	Apoptotic chromatin condensation inducer in the nucleus	ACIN1	GVPAGNS(0.96)DT(0.04)EGGQPGR	S780	25.7682	25.3006	24.9027	25.5817	25.5939	26.0788
S4R3H4	Apoptotic chromatin condensation inducer in the nucleus	ACIN1	S(1)LS(1)PGVSR	S597	25.3833	25.6783	25.8765	26.0941	25.9441	25.7861
S4R3H4	Apoptotic chromatin condensation inducer in the nucleus	ACIN1	SLS(1)PGVSR	S599	27.1195	25.6783	27.16	27.1055	26.938	26.9454
S4R3H4	Apoptotic chromatin condensation inducer in the nucleus	ACIN1	LQPERGS(1)PK	S671	28.4875	28.7717	27.9671	27.6371	27.761	28.385
S4R3H4	Apoptotic chromatin condensation inducer in the nucleus	ACIN1	RAS(0.977)HT(0.023)LLPSHR	S503	24.8821	24.8991	24.667	21.8837	23.5286	23.7498
S4R3H4	Apoptotic chromatin condensation inducer in the nucleus	ACIN1	RLS(1)QPESAEK	S652	28.1465	27.6442	27.5785	28.421	27.5892	27.2176
S4R3H4	Apoptotic chromatin condensation inducer in the nucleus	ACIN1	TAQVPS(1)PPRGK	S946	28.5892	28.5847	29.1439	28.5908	28.8709	29.5217
S4R3H4	Apoptotic chromatin condensation inducer in the nucleus	ACIN1	S(0.004)KS(0.995)PS(0.964)PPRLT(0.036)EDR	S328	28.0143	27.9664	27.5626	27.0854	21.709	27.7281
S4R3H4	Apoptotic chromatin condensation inducer in the nucleus	ACIN1	S(0.031)KS(0.969)PS(0.981)PPRLT(0.019)EDR	S330	28.0853	27.9664	27.6378	27.0854	20.9845	27.8137
S4R3H4	Apoptotic chromatin condensation inducer in the nucleus	ACIN1	SSSISEEKGDS(1)DDEKPR	S158	29.0365	28.6657	28.0691	27.9744	28.712	28.3667
S4R3H4	Apoptotic chromatin condensation inducer in the nucleus	ACIN1	TTS(1)PLEEEER	S307	27.039	26.6217	26.6614	27.2505	26.6533	26.5258
E7ERS3	Zinc finger CCCH domain-containing protein 18	ZC3H18	AS(1)DLEDEESAAR	S46	28.3677	28.6747	27.8444	29.6402	28.5958	29.0356
E7ERS3	Zinc finger CCCH domain-containing protein 18	ZC3H18	GPSQEEEDNHS(0.974)DEEDRAS(0.026)EPK	S67	24.4644	24.5513	23.9357	21.2676	24.6466	25.1895
E7ERS3	Zinc finger CCCH domain-containing protein 18	ZC3H18	TSDLRDEAS(0.17)S(0.828)VT(0.003)R	S118	27.4111	26.8163	26.9498	27.2578	27.2021	27.0928
E7ERS3	Zinc finger CCCH domain-containing protein 18	ZC3H18	LGVS(1)VS(0.98)PS(0.02)R	S556	26.2329	22.7576	25.5779	24.9121	24.5576	24.3322
E7ERS3	Zinc finger CCCH domain-containing protein 18	ZC3H18	LGVS(1)VS(0.991)PS(0.009)R	S558	30.4433	30.5367	30.1311	30.2415	30.5173	30.2765
E7ERS3	Zinc finger CCCH domain-containing protein 18	ZC3H18	KRQLS(1)PQSK	S917	23.2363	23.8321	23.5819	20.9144	23.1677	22.7727
E7ERS3	Zinc finger CCCH domain-containing protein 18	ZC3H18	MDVAES(1)PER	S6	25.0935	24.674	25.3984	27.2256	26.4771	25.7541
E7ERS3	Zinc finger CCCH domain-containing protein 18	ZC3H18	S(1)PQPPSR	S511	22.8374	23.4482	22.9495	23.6309	22.8558	23.2898
E7ERS3	Zinc finger CCCH domain-containing protein 18	ZC3H18	SQDQDS(1)EVNELSR	S83	26.949	26.493	26.6955	27.0227	26.4965	26.2533
E7ERS3	Zinc finger CCCH domain-containing protein 18	ZC3H18	T(0.017)LS(0.868)GS(0.102)GS(0.011)GS(0.001)GS(0.001)SYSGSSSR	S709	21.5598	21.6798	21.2804	22.8373	23.0778	23.2283
H0YHH6	Calcium-transporting ATPase;Plasma membrane calcium-transporting ATPase 1	ATP2B1	IEDS(1)EPHIPLIDDTDAEDDAPTKR	S136	24.7727	24.3448	24.4334	25.3517	25.5529	25.217
H0YHH6	Calcium-transporting ATPase;Plasma membrane calcium-transporting ATPase 1	ATP2B1	S(0.152)S(0.848)IHNFMTHPEFR	S121	24.6146	23.7765	23.9922	24.5026	24.3257	24.8324
E7ES68	Zinc phosphodiesterase ELAC protein 2	ELAC2	CLQEGAEIS(0.216)S(0.784)PAVER	S418	23.0733	23.2689	23.2093	23.2	23.1568	23.2852
H0YBP1	Focal adhesion kinase 1	PTK2	LQPQEIS(1)PPPTANLDR	S875	25.319	24.781	24.8652	25.5188	24.7555	24.5746
F8W7U3	WASH complex subunit FAM21A	FAM21A	GLFS(1)DEEDSEDLFSSQSASK	S451	24.7269	26.2521	25.4649	27.1883	26.4197	26.5388
F8W7U3	WASH complex subunit FAM21A	FAM21A	LAAQES(0.006)S(0.992)ET(0.002)EDMSVPR	S966	21.8071	23.2243	23.3392	24.1396	23.3848	24.0824
E7ESJ3	Ankyrin repeat domain-containing protein 26	ANKRD26	AAEHDLEVAS(1)EEEQER	S546	23.9842	23.4977	24.0223	25.3088	23.9167	24.1123
E7ESJ3	Ankyrin repeat domain-containing protein 26	ANKRD26	ESVNS(1)PVFGK	S647	23.5445	23.5114	23.9612	25.2671	24.4252	24.6751
E7ESJ3		ANKRD26	NIGNEQAEES(1)PER	S505	22.8168	21.9666	22.0921	23.5894	22.9859	23.7166
H0Y4T7	Metastasis-associated protein MTA1	MTA1	AGVVNGTGAPGQS(1)PGAGR	S178	26.5165	26.2027	26.102	25.9655	25.868	25.8396
H0Y4T7	Metastasis-associated protein MTA1	MTA1	LPEASQS(1)PLVLK	S314	24.7758	24.5961	24.7907	24.8145	24.6257	25.0311
H0Y4T7	Metastasis-associated protein MTA1	MTA1	SNMS(1)PHGLPAR	S241	25.4002	25.3449	25.0525	25.2225	26.0311	25.2296
H0Y4T7	Metastasis-associated protein MTA1	MTA1	VAPVINNGS(0.981)PT(0.019)ILGKR	S368	25.3888	25.5027	25.0004	26.1958	25.4518	24.7875
E7ET52	Zinc finger protein ZFPM2	ZFPM2	DAS(0.004)S(0.992)DT(0.004)ELDKCEK	S302	23.4125	21.1265	23.3839	23.4836	23.9654	23.7218
F5GXF5	Nucleosome-remodeling factor subunit BPTF	BPTF	DRVLDDVS(0.001)IRS(0.999)PETK	S1237	25.1615	24.4558	24.9753	24.936	24.7401	25.1595
F5GXF5	Nucleosome-remodeling factor subunit BPTF	BPTF	NLSES(1)PVITK	S1168	27.0264	26.5001	26.4587	25.8146	25.781	25.4201
F5GXF5	Nucleosome-remodeling factor subunit BPTF	BPTF	VHRPRS(1)PILEEK	S216	25.7252	21.3067	25.0054	25.6385	25.2635	25.0265
F5GXF5	Nucleosome-remodeling factor subunit BPTF	BPTF	VGS(1)PATVTFQQNK	S2035	25.3478	25.3728	25.3586	24.241	24.2672	23.92
E7ETM0		CSNK1A1	CLES(1)PVGK	S67	22.1382	21.4752	22.0585	22.5026	22.6766	22.459
J3KQ96	Treacle protein	TCOF1	AALAPAKES(1)PRK	S906	31.613	31.4748	31.7071	31.0823	31.2078	31.1497
J3KQ96	Treacle protein	TCOF1	AASAPAKES(1)PR	S381	27.5974	27.8984	27.1083	28.4059	26.8137	26.6506
J3KQ96	Treacle protein	TCOF1	ASSVSTKES(1)PAR	S233	26.1831	24.6131	24.02	24.3967	23.7006	24.1969
J3KQ96	Treacle protein	TCOF1	QEAKPQQAAGMLS(1)PK	S1219	23.4209	19.7802	23.4608	24.1752	23.484	22.7644
J3KQ96	Treacle protein	TCOF1	LGAGEGGEAS(1)VS(1)PEKTSTTSK	S1338	25.2541	24.8453	24.6704	27.8091	22.4155	25.2808
J3KQ96	Treacle protein	TCOF1	LGAGEGGEASVS(1)PEKTSTTSK	S1340	29.0709	29.4233	28.9025	28.6594	28.6875	28.6721
J3KQ96	Treacle protein	TCOF1	RKLS(1)GDQPAAR	S1312	29.6782	29.7712	29.4449	30.07	30.2766	30.2073
J3KQ96	Treacle protein	TCOF1	LDS(0.034)S(0.965)PSVSSTLAAK	S1190	25.937	25.4566	25.5927	27.4149	25.8331	25.9906
J3KQ96	Treacle protein	TCOF1	T(0.037)ET(0.044)LVEET(0.069)AAES(0.918)S(0.912)EDDVVAPS(0.01)QS(0.01)LLS(0.001)GYMTPGLTPANSQASK	S1152	21.0262	21.5473	23.2039	24.6356	23.5238	23.7382
J3KQ96	Treacle protein	TCOF1	T(0.037)ET(0.044)LVEET(0.069)AAES(0.918)S(0.912)EDDVVAPS(0.01)QS(0.01)LLS(0.001)GYMTPGLTPANSQASK	S1153	21.459	22.0225	23.2039	24.6356	23.5238	23.7382
J3KQ96	Treacle protein	TCOF1	TVANLLSGKS(1)PR	S156	31.3181	30.7181	31.0312	30.8131	30.9646	30.4487
E7ETY4	Serine/threonine-protein kinase MARK2	MARK2	GAS(0.999)GS(0.001)IFSK	S551	22.5415	22.4647	22.3435	23.3355	23.2433	23.6092
E7ETY4		MARK2	RFS(1)DQAGPAIPTSNSYSK	S376	23.4143	23.6954	24.0576	23.1585	23.5725	21.644
E7ETY4	Serine/threonine-protein kinase MARK2	MARK2	SRNS(1)PLLER	S452	27.2831	27.059	27.1074	27.4325	27.6213	27.2728
E7ETY4	Serine/threonine-protein kinase MARK2	MARK2	VPAS(1)PLPGLER	S422	24.7338	23.8544	24.5053	25.9309	25.6381	25.543
E7EUB5	DNA repair protein complementing XP-C cells	XPC	VIKDEALS(1)DGDDLR	S88	23.9282	23.7492	24.0185	24.8138	24.7145	24.3367
E7EUL7	Sperm-specific antigen 2	SSFA2	S(0.001)QS(0.999)LPTTLLS(0.999)PVR	S248	26.3173	26.0282	26.0325	26.5477	26.3241	26.1539
E7EUL7	Sperm-specific antigen 2	SSFA2	S(0.001)QS(0.999)LPTTLLS(0.999)PVR	S255	22.67	22.2865	22.231	23.7826	22.6062	22.3854
E7EUV9	Histone RNA hairpin-binding protein	SLBP	CDGDAS(1)PPS(1)PAR	S20	26.0695	26.518	25.8822	25.6469	25.9931	26.1614
E7EUV9	Histone RNA hairpin-binding protein	SLBP	CDGDAS(1)PPS(1)PAR	S23	26.6956	26.9458	26.8546	26.8669	26.7235	26.766
E7EVA0	Microtubule-associated protein;Microtubule-associated protein 4	MAP4	AS(1)PIKMDLAPSK	S375	23.1972	23.2104	23.6021	25.1822	22.9755	22.895
E7EVA0	Microtubule-associated protein;Microtubule-associated protein 4	MAP4	AS(1)PSKPASAPASR	S1932	27.6003	27.9738	27.3055	26.3297	26.702	26.6618
E7EVA0	Microtubule-associated protein;Microtubule-associated protein 4	MAP4	DMES(1)PTKLDVTLAK	S297	26.7777	26.7824	25.7804	26.6139	25.7362	26.8483
E7EVA0	Microtubule-associated protein;Microtubule-associated protein 4	MAP4	DMS(1)PLSETEMALGK	S524	20.904	23.4601	25.2192	25.5335	23.2033	22.3579
E7EVA0	Microtubule-associated protein;Microtubule-associated protein 4	MAP4	EAQTLDSQIQET(0.021)S(0.979)I	S2296	25.0963	21.4702	26.0074	25.348	25.2093	25.0216
E7EVA0	Microtubule-associated protein;Microtubule-associated protein 4	MAP4	GISEDSHLESLQDVGQSAAPT(0.001)FMIS(0.963)PET(0.034)VT(0.001)GTGK	S641	25.0636	25.3829	25.0342	25.318	25.4281	25.4611
E7EVA0	Microtubule-associated protein;Microtubule-associated protein 4	MAP4	KCS(1)LPAEEDSVLEK	S653	22.7967	19.9889	22.1736	24.3131	23.8279	23.4974
E7EVA0	Microtubule-associated protein;Microtubule-associated protein 4	MAP4	SKVGS(0.916)T(0.084)ENIK	S2086	25.014	25.3892	24.9895	26.7659	25.2821	24.3663
E7EVA0	Microtubule-associated protein;Microtubule-associated protein 4	MAP4	VGS(1)LDNVGHLPAGGAVK	S2218	27.15	27.0952	27.0635	28.1394	23.1524	28.0588
E7EVA0	Microtubule-associated protein	MAP4	VPPELLGGS(1)PPWK	S723	22.2326	21.8187	22.2705	23.3627	23.4486	22.5608
I3L2L9	Fanconi anemia-associated protein of 100 kDa	C17orf70;FAAP100	APS(0.987)PLGPT(0.013)RDPVATFLETCREPGSQPAGPASLR	S41	22.268	22.4058	21.986	23.0361	22.5835	22.832
E7EVX2	Golgin subfamily A member 4	GOLGA4	S(0.005)S(0.011)S(0.984)KES(1)LVR	S111	25.1102	25.3449	24.8011	25.145	25.1145	25.1761
E7EVX2	Golgin subfamily A member 4	GOLGA4	S(0.005)S(0.011)S(0.984)KES(1)LVR	S114	25.1102	25.3449	24.8011	25.145	25.1145	25.1761
E7EVX2		GOLGA4	TSS(1)FTEQLDEGTPNRENASTHASK	S41	25.1648	24.9822	25.1402	26.4488	25.5441	25.2219
E7EVX2	Golgin subfamily A member 4	GOLGA4	VPS(1)VESLFR	S93	23.8023	24.6095	24.2855	26.5067	24.0675	23.5443
E7EVX8	U4/U6 small nuclear ribonucleoprotein Prp31	PRPF31	QSVVYGGKS(1)T(1)IRDR	S433	25.4432	26.1862	26.08	26.8507	21.6309	26.3214
E7EVX8	U4/U6 small nuclear ribonucleoprotein Prp31	PRPF31	S(0.014)S(0.015)GT(0.018)AS(0.978)S(0.976)VAFT(0.999)PLQGLEIVNPQAAEKK	S444	22.3418	22.0204	24.4859	23.8941	24.5141	24.3031
E7EVX8	U4/U6 small nuclear ribonucleoprotein Prp31	PRPF31	S(0.014)S(0.015)GT(0.018)AS(0.978)S(0.976)VAFT(0.999)PLQGLEIVNPQAAEKK	S445	22.3418	25.214	21.7833	24.996	24.5141	24.3031
E7EW05	Protein SDA1 homolog	SDAD1	YIEIDS(1)DEEPR	S548	25.8433	25.101	25.4264	26.5169	25.6865	25.8536
E7EWD6	Putative Polycomb group protein ASXL2	ASXL2	LT(0.001)AS(0.925)PS(0.074)DPK	S367	23.2964	23.4423	23.0599	23.8756	23.0353	21.5214
E7EWD6	Putative Polycomb group protein ASXL2	ASXL2	LYGS(0.991)PT(0.009)QIGPSYR	S1291	24.5959	24.0262	23.6476	23.4259	23.1761	22.8859
E7EWM1	Nuclear receptor coactivator 2	NCOA2	ECPDQLGPS(1)PK	S29	23.8223	24.2238	23.9546	24.0346	23.86	24.5024
E7EWM1	Nuclear receptor coactivator 2	NCOA2	LLQDS(0.007)S(0.056)S(0.938)PVDLAK	S699	24.7689	24.7882	24.4404	24.4349	24.6054	23.9991
H7C1I9	Microtubule-associated serine/threonine-protein kinase 4	MAST4	ELS(0.948)PS(0.04)S(0.011)LK	S917	22.0416	22.0211	22.2818	22.2637	22.0657	22.4324
E7EWR4	Cleavage stimulation factor subunit 2	CSTF2	QVPVMQGTGMQGASIQGGS(0.001)QPGGFS(0.956)PGQNQVT(0.043)PQDHEK	S544	25.0592	24.484	24.9619	25.4847	24.4638	25.0632
E7EX17	Eukaryotic translation initiation factor 4B	EIF4B	AAS(1)IFGGAKPVDTAAR	S359	25.3541	25.1384	24.7125	23.8944	23.9551	24.0478
E7EX17	Eukaryotic translation initiation factor 4B	EIF4B	ERHPS(1)WR	S406	20.9862	27.0989	26.9898	27.5549	27.0039	26.5961
E7EX17	Eukaryotic translation initiation factor 4B	EIF4B	RGDDS(1)FGDKYR	S219	25.4371	24.6675	24.6523	23.626	23.4857	21.8522
E7EX17	Eukaryotic translation initiation factor 4B	EIF4B	SQSS(0.989)DT(0.01)EQQSPTSGGGK	S503	25.9293	25.5976	25.2585	25.0915	26.7112	25.9722
E7EX17	Eukaryotic translation initiation factor 4B	EIF4B	S(0.002)QS(0.209)S(0.789)DTEQQS(0.971)PT(0.015)S(0.013)GGGKVAPAQPSEEGPGR	S509	27.143	26.4331	26.7662	22.5992	26.9325	25.3743
E7EX17	Eukaryotic translation initiation factor 4B	EIF4B	T(0.01)GS(0.99)ESSQTGTSTTSSR	S422	23.3098	23.4789	22.6723	24.6854	23.2455	23.1184
E7EX17	Eukaryotic translation initiation factor 4B	EIF4B	YAALS(1)VDGEDENEGEDYAE	S602	26.3286	26.1704	26.3471	25.7056	26.0855	25.9957
F8VZJ2	Nascent polypeptide-associated complex subunit alpha;Nascent polypeptide-associated complex subunit alpha, muscle-specific form	NACA	VQGEAVSNIQENTQTPTVQEES(1)EEEEVDETGVEVK	S87	31.5962	30.824	31.3787	31.385	31.356	31.5899
E9PBS1	Multifunctional protein ADE2;Phosphoribosylaminoimidazole-succinocarboxamide synthase;Phosphoribosylaminoimidazole carboxylase	PAICS	EVYELLDS(1)PGKVLLQSK	S27	25.5747	25.7679	25.9828	26.2885	25.1085	25.4473
F8SNU6	Integrin-linked kinase-associated serine/threonine phosphatase 2C	ILKAP2;ILKAP;ILKAP3	MDLFGDLPEPERS(1)PRPAAGK	S13	26.6376	27.5886	26.7735	27.2759	27.1719	27.7581
E9PC52	Histone-binding protein RBBP7	RBBP7	AS(1)KEMFEDTVEER	S3	23.2811	23.1322	21.7083	23.2337	23.2891	23.4166
E9PCH4	Rap guanine nucleotide exchange factor 6	RAPGEF6	LGDVTDADS(1)EADENEQVSAV	S1640	25.6087	25.6884	25.5139	25.988	25.8908	26.0308
E9PCH4	Rap guanine nucleotide exchange factor 6	RAPGEF6	LPEGPVDS(1)EDDEEEDEEIDRTDPLQGR	S280	24.0606	23.7109	21.9801	25.0057	24.3681	24.039
E9PCH4	Rap guanine nucleotide exchange factor 6	RAPGEF6	SSEMS(1)PVPMR	S1207	23.7156	23.3992	23.4677	24.8105	24.5536	24.8774
E9PCY7	Heterogeneous nuclear ribonucleoprotein H;Heterogeneous nuclear ribonucleoprotein H, N-terminally processed	HNRNPH1	EGRPSGEAFVELES(1)EDEVK	S63	20.741	23.9678	23.4901	24.6482	23.4207	23.5147
E9PCY7	Heterogeneous nuclear ribonucleoprotein H;Heterogeneous nuclear ribonucleoprotein H, N-terminally processed;Heterogeneous nuclear ribonucleoprotein H2	HNRNPH1;HNRNPH2	HTGPNS(1)PDTANDGFVR	S104	30.6447	30.5185	30.3567	29.708	30.0022	29.8107
E9PD50	Protein SMG7	SMG7	AVPALGKS(0.957)PPHHS(0.043)GFQQYQQADASK	S764	24.7998	23.7994	23.6312	22.5208	25.7299	21.3734
H0YF64	Calcipressin-3;Calcipressin-1	RCAN3;RCAN1	QFLIS(1)PPAS(1)PPVGWK	S15	23.4425	22.462	23.0137	24.3322	23.1006	22.8678
H0YF64	Calcipressin-3;Calcipressin-1	RCAN3;RCAN1	QFLIS(1)PPAS(1)PPVGWK	S19	23.4425	22.462	23.0137	24.3322	23.1006	22.8678
E9PEI0	Cell division cycle-associated protein 2	CDCA2	GS(1)PETNHLIR	S83	20.2633	24.1527	24.1498	24.0786	23.662	23.7362
E9PEI0	Cell division cycle-associated protein 2	CDCA2	GS(0.01)S(0.01)DAVS(0.926)PDT(0.048)FT(0.005)AEVSSDAVPDVR	S276	22.5416	22.6066	21.5754	23.4232	22.1213	22.3289
E9PEI0	Cell division cycle-associated protein 2	CDCA2	RS(0.17)S(0.83)LNGKGESSLTALER	S985	23.5894	22.3627	23.048	22.2706	21.57	21.8161
[truncated: 5,584 more rows]
