# Supplementary material for: Selective inhibition reveals the regulatory function of DYRK2 in protein synthesis and calcium entry
Source: eLife journal article supplement (doi:10.7554/elife.77696), 2022-04-19
Supplement: fig4-figsupp1-data1 [file Raw qPCR data of knockdown efficiency of DYRK2-expression in wild-type HEK293T.xlsx]

## Sheet: Sheet1
		Knockdown efficiency of DYRK2-expression in wild-type HEK293T stably expressed DYRK2 shRNA was measured by qPCR
		NC
			GAPDH				DYRK2
			1	2	3		6	7	8
		A	14.199	14.17	14.176		25.023	24.728	25.219
		B	14.21	14.171	14.132		25.141	24.746	25.208
		C	14.242	14.189	14.058		25.146	24.781	24.974
		mean	14.217	14.1767	14.122		25.1033	24.7517	25.1337
							10.8863	10.575	11.0117
		DRYK2
		GAPDH					DYRK2
		D	14.024	13.834	14.101		26.779	26.871	26.832
		E	14.073	13.772	14.083		26.698	26.877	26.64
		F	14.095	13.91	14.121		26.14	26.202	26.305
		mean	14.064	13.8387	14.1017		26.539	26.65	26.5923
							12.475	12.8113	12.4907
						DRYK2-NC	1.58867	2.23633	1.479
						2^X	3.00771	4.71198	2.78755
						1/(2^X)	0.332479	0.212225	0.358737
