# Supplementary material for: Selective inhibition reveals the regulatory function of DYRK2 in protein synthesis and calcium entry
Source: eLife journal article supplement (doi:10.7554/elife.77696), 2022-04-19
Supplement: fig5-data5 [file Fig G-I.xlsx]

## Sheet: Fig G
Fig G FRET responses between STIM1-YFP and CFP-Orai1
	Eapp
Time [s]	Endogenous
0	0.053256	0.056951	0.049776	0.05239	0.022582	0.0055308	0.024386	0.041887	0.048021	0.048248	0.028634	0.017102	0.02769	0.030096	0.025661	0.019881	0.034127	0.04011	-0.0001059	0.032853	0.025695	0.044035	0.026277	0.045921	0.043158	0.049498	0.028619	0.028144	0.021744	0.03945	0.029032	0.033466	0.037712	0.025451	0.025312	0.029399	0.0080886	0.036095	0.036846	0.016853	0.056645	0.036557	0.035529	0.024437	0.023762	0.0029637	0.039543	0.048849
10	0.055992	0.059566	0.052586	0.055546	0.025346	0.0074993	0.027524	0.045426	0.050852	0.051268	0.032273	0.019653	0.030966	0.033494	0.028187	0.02312	0.036657	0.042628	-0.0022325	0.034355	0.028288	0.047243	0.028834	0.047748	0.045836	0.051642	0.030091	0.029833	0.022337	0.039	0.031555	0.03591	0.040743	0.027914	0.028201	0.033475	0.0094437	0.040812	0.04059	0.019772	0.060492	0.04022	0.039027	0.028539	0.026311	0.0051397	0.044146	0.050664
20.001	0.056175	0.060093	0.05392	0.055972	0.025068	0.007314	0.028346	0.045389	0.052092	0.05118	0.03197	0.020207	0.031072	0.034039	0.029137	0.022899	0.037762	0.044042	-0.0016673	0.036103	0.029534	0.048226	0.03035	0.048668	0.046825	0.053209	0.032519	0.032559	0.023445	0.042228	0.032679	0.038226	0.041579	0.029004	0.029413	0.033418	0.010273	0.041801	0.041357	0.020526	0.060781	0.040505	0.040047	0.028549	0.02792	0.0055632	0.044339	0.054791
30	0.055639	0.059942	0.052948	0.055476	0.024645	0.0072329	0.027427	0.044588	0.050984	0.051428	0.031859	0.020796	0.030697	0.033146	0.028239	0.023135	0.038178	0.043023	0.0010076	0.035845	0.029633	0.048405	0.029233	0.049317	0.046698	0.052869	0.032683	0.032309	0.022719	0.041442	0.032289	0.036276	0.041115	0.028405	0.029651	0.034241	0.011281	0.041057	0.040605	0.020441	0.059573	0.039817	0.040131	0.02871	0.027222	0.0056747	0.043578	0.055769
40	0.055928	0.060263	0.052225	0.055874	0.025111	0.0087602	0.027574	0.044726	0.052054	0.051596	0.031985	0.019993	0.031197	0.034075	0.028396	0.023349	0.037728	0.043619	0.0013892	0.03652	0.029677	0.048971	0.029495	0.049426	0.046534	0.052788	0.033419	0.031022	0.023775	0.041703	0.033201	0.037701	0.041452	0.029192	0.02964	0.033925	0.011273	0.041314	0.041263	0.019909	0.060951	0.040616	0.03993	0.02849	0.027679	0.0062274	0.044494	0.052609
50	0.056654	0.060633	0.052782	0.056672	0.025836	0.0091179	0.028407	0.045957	0.052495	0.051624	0.032943	0.021008	0.031932	0.034111	0.028806	0.024168	0.038576	0.043233	0.0013347	0.036413	0.030047	0.048328	0.030509	0.048757	0.046792	0.053825	0.033265	0.032328	0.023741	0.043705	0.033477	0.037855	0.04162	0.029107	0.029773	0.034804	0.010462	0.041217	0.041354	0.020748	0.061803	0.040995	0.040612	0.029041	0.027814	0.0063915	0.04457	0.05197
60.001	0.056281	0.060024	0.05245	0.055855	0.025776	0.0093697	0.028131	0.045792	0.051485	0.051543	0.031663	0.021427	0.0313	0.034261	0.029078	0.023646	0.037994	0.042739	0.0017401	0.036479	0.030304	0.049071	0.029553	0.048528	0.047315	0.053623	0.034156	0.032072	0.0232	0.042725	0.033632	0.036852	0.041701	0.02901	0.029748	0.034276	0.011649	0.041666	0.041244	0.020925	0.061763	0.040233	0.040376	0.028792	0.027269	0.005954	0.044301	0.052781
70.001	0.055803	0.060328	0.052987	0.055683	0.025662	0.0097631	0.027175	0.044309	0.051329	0.051818	0.031939	0.020933	0.031699	0.033632	0.028639	0.023881	0.03702	0.042745	-2.726e-05	0.036702	0.029052	0.04909	0.028894	0.04865	0.046803	0.05257	0.033584	0.031773	0.02304	0.043554	0.033521	0.037781	0.0414	0.029216	0.029816	0.033368	0.010325	0.041204	0.040594	0.020593	0.061181	0.039353	0.039893	0.028074	0.026784	0.0055478	0.043464	0.053188
80.001	0.056586	0.060918	0.052992	0.056565	0.025982	0.0096509	0.027902	0.045653	0.051911	0.052333	0.03212	0.021597	0.031862	0.034452	0.029497	0.023555	0.037749	0.042726	0.00085427	0.037056	0.029632	0.048223	0.029012	0.048552	0.046948	0.052881	0.033202	0.031545	0.024878	0.045204	0.033489	0.036864	0.041097	0.029493	0.02928	0.034482	0.010495	0.041251	0.040164	0.020151	0.060728	0.040015	0.040369	0.028793	0.026543	0.0058673	0.041928	0.055139
90.002	0.057127	0.060318	0.052776	0.055945	0.024944	0.01084	0.02763	0.04525	0.052285	0.052345	0.03243	0.021349	0.031812	0.034399	0.029947	0.023671	0.037844	0.042771	0.0015667	0.038496	0.029411	0.049481	0.03013	0.048132	0.047523	0.052959	0.032316	0.030765	0.023155	0.043734	0.033885	0.036988	0.041129	0.030288	0.029454	0.033921	0.011238	0.041776	0.040613	0.020709	0.060939	0.039299	0.039635	0.028759	0.026695	0.0056268	0.043498	0.054599
100	0.056995	0.059921	0.052453	0.056283	0.02531	0.010631	0.027833	0.044868	0.052248	0.052082	0.032197	0.020968	0.032141	0.033893	0.029955	0.023579	0.037756	0.043233	0.0017099	0.037173	0.028652	0.04847	0.030305	0.048882	0.047675	0.052776	0.033169	0.033718	0.023292	0.043427	0.034314	0.037716	0.041426	0.029041	0.02932	0.034033	0.010383	0.041123	0.040172	0.020054	0.060513	0.039334	0.040339	0.029035	0.026252	0.0053818	0.043052	0.050557
131.18	0.061055	0.06373	0.057606	0.056023	0.027435	0.011636	0.029206	0.045521	0.052822	0.053548	0.036839	0.024734	0.032598	0.035641	0.031957	0.025768	0.035265	0.041404	0.0029798	0.034691	0.027973	0.04676	0.028274	0.047632	0.046896	0.049976	0.031658	0.030345	0.020493	0.04011	0.033192	0.037203	0.040152	0.028042	0.027728	0.032103	0.010338	0.039689	0.03811	0.01849	0.058904	0.037751	0.037711	0.026664	0.025528	0.0049308	0.041282	0.050374
141.18	0.067063	0.068935	0.063799	0.057085	0.0293	0.013629	0.030147	0.04701	0.055975	0.05915	0.041488	0.029877	0.034986	0.039395	0.035069	0.031303	0.042557	0.045855	0.024124	0.039828	0.035297	0.053721	0.035397	0.054474	0.054528	0.056658	0.041169	0.037949	0.027522	0.046716	0.039906	0.043858	0.04113	0.02909	0.029088	0.033771	0.01204	0.041151	0.040432	0.020029	0.060819	0.03973	0.039452	0.028542	0.026788	0.0059754	0.042764	0.053162
151.18	0.07264	0.074424	0.069272	0.059143	0.033035	0.019453	0.031378	0.050575	0.059573	0.064537	0.045607	0.036332	0.039614	0.045329	0.040248	0.037485	0.048659	0.052044	0.047887	0.045945	0.04206	0.060852	0.044737	0.061958	0.062718	0.061029	0.04786	0.044746	0.034056	0.050453	0.050108	0.046857	0.042698	0.029492	0.030274	0.035323	0.013695	0.043145	0.042578	0.021624	0.063629	0.041037	0.040935	0.030331	0.032254	0.0078478	0.045922	0.05611
161.18	0.076506	0.078307	0.075778	0.062704	0.038405	0.025277	0.033321	0.054524	0.062622	0.070137	0.050255	0.041359	0.04432	0.049717	0.045231	0.042774	0.0552	0.059488	0.066416	0.054704	0.047852	0.067386	0.057117	0.069707	0.069989	0.065493	0.054117	0.04979	0.042074	0.057393	0.060991	0.050806	0.047052	0.032005	0.033747	0.036587	0.019639	0.047775	0.047447	0.02467	0.068466	0.045244	0.043753	0.034757	0.041774	0.012776	0.052455	0.060536
171.18	0.081689	0.083057	0.080804	0.065635	0.042443	0.031661	0.035496	0.05903	0.065917	0.074997	0.052982	0.045926	0.048638	0.054064	0.049361	0.048077	0.059446	0.06409	0.074683	0.059675	0.051008	0.072008	0.064905	0.074588	0.073843	0.068359	0.058668	0.05161	0.04672	0.062586	0.066477	0.05186	0.052323	0.033871	0.036701	0.039723	0.02646	0.051489	0.050913	0.028428	0.073217	0.051138	0.047491	0.040208	0.049643	0.01958	0.05811	0.062618
181.18	0.083796	0.085075	0.083178	0.06819	0.045667	0.036066	0.037628	0.063604	0.068372	0.077922	0.054615	0.049184	0.052027	0.056986	0.052523	0.051853	0.061543	0.06729	0.078529	0.061694	0.05273	0.072791	0.069171	0.076735	0.077935	0.069549	0.060184	0.052716	0.048716	0.063534	0.069316	0.050702	0.056983	0.037011	0.039619	0.042568	0.033402	0.054439	0.054541	0.032251	0.077947	0.055799	0.051037	0.045893	0.054671	0.026742	0.064915	0.070226
191.18	0.086552	0.087126	0.085722	0.070895	0.04892	0.039746	0.039311	0.066697	0.070418	0.081372	0.055956	0.050931	0.054446	0.059652	0.055265	0.054268	0.062951	0.069137	0.08106	0.063665	0.053598	0.075555	0.072616	0.077833	0.078918	0.070692	0.060407	0.053996	0.050423	0.064143	0.071813	0.052055	0.06035	0.039836	0.041647	0.044313	0.038763	0.056335	0.056941	0.034023	0.080481	0.058122	0.05258	0.049301	0.057449	0.030562	0.068015	0.077425
201.18	0.088331	0.088252	0.088229	0.072468	0.05132	0.042884	0.041267	0.069834	0.072109	0.083463	0.056747	0.052892	0.057418	0.061665	0.057205	0.055976	0.064559	0.07053	0.082443	0.0656	0.053655	0.076176	0.075157	0.079763	0.079972	0.071876	0.060931	0.055523	0.050655	0.064437	0.073875	0.051048	0.062799	0.041924	0.044325	0.045738	0.043271	0.057668	0.05801	0.037101	0.082299	0.06192	0.054453	0.052305	0.059803	0.03422	0.070991	0.081324
211.18	0.089233	0.089318	0.089278	0.072203	0.052638	0.045167	0.042001	0.070652	0.072851	0.08381	0.056938	0.053765	0.058364	0.062509	0.058128	0.056864	0.06484	0.072138	0.081389	0.065921	0.054565	0.076306	0.07631	0.079771	0.0793	0.071782	0.061832	0.055577	0.050352	0.064242	0.074274	0.051265	0.06368	0.042547	0.045046	0.047167	0.04636	0.058007	0.058605	0.037584	0.083205	0.063924	0.055191	0.054148	0.060329	0.037144	0.072103	0.078338
221.19	0.09043	0.089627	0.09005	0.073966	0.053378	0.046748	0.043527	0.072544	0.07343	0.084761	0.057635	0.054498	0.059608	0.063144	0.059353	0.059012	0.066907	0.072847	0.082342	0.06765	0.055074	0.077554	0.077475	0.080862	0.081687	0.073179	0.061394	0.056368	0.051986	0.065404	0.075586	0.055205	0.065925	0.04456	0.046296	0.048346	0.049308	0.059941	0.060728	0.039457	0.084599	0.066463	0.056194	0.055798	0.061497	0.039635	0.074055	0.081093
231.19	0.090892	0.090741	0.090162	0.074634	0.054479	0.047007	0.043739	0.073585	0.073986	0.085994	0.057165	0.054799	0.060248	0.063539	0.060423	0.05955	0.065987	0.071659	0.08148	0.067596	0.054791	0.076674	0.076616	0.079869	0.081046	0.072576	0.062762	0.055604	0.049968	0.066845	0.07504	0.056129	0.066648	0.046029	0.046573	0.049005	0.050633	0.059883	0.060891	0.0403	0.085433	0.067533	0.057038	0.056252	0.06177	0.04105	0.075698	0.083809
241.19	0.091638	0.091027	0.090521	0.075124	0.055227	0.048874	0.044518	0.075119	0.074458	0.087303	0.057357	0.055855	0.060701	0.063213	0.060775	0.060325	0.065504	0.072799	0.081171	0.067224	0.054084	0.077632	0.077665	0.079966	0.081437	0.072558	0.062576	0.056379	0.052097	0.067156	0.076686	0.054948	0.066501	0.04648	0.047167	0.049931	0.051441	0.060254	0.060848	0.040786	0.084887	0.068158	0.057919	0.056919	0.062565	0.043317	0.076008	0.089441
251.19	0.091703	0.091801	0.091768	0.075351	0.055723	0.049691	0.04474	0.074928	0.075142	0.088587	0.058142	0.055754	0.061444	0.064361	0.060846	0.060696	0.066252	0.073384	0.081763	0.068557	0.055162	0.076536	0.078122	0.080851	0.080454	0.072554	0.062808	0.056665	0.051416	0.066844	0.075732	0.057316	0.067483	0.047209	0.047955	0.050424	0.052908	0.060614	0.061823	0.040849	0.085148	0.068661	0.058691	0.057223	0.062552	0.043229	0.075958	0.085377
261.19	0.093164	0.091981	0.092185	0.075729	0.055231	0.050429	0.044703	0.075652	0.075085	0.089101	0.0586	0.056567	0.062041	0.064246	0.06066	0.06114	0.066011	0.072984	0.080804	0.067431	0.054013	0.077188	0.077761	0.08074	0.080651	0.072233	0.06162	0.05631	0.050471	0.064579	0.07542	0.05559	0.067278	0.04753	0.047508	0.050735	0.052952	0.060531	0.062403	0.040541	0.085405	0.068612	0.058906	0.057728	0.062468	0.044221	0.076051	0.081967
271.19	0.093165	0.091778	0.093571	0.075613	0.056167	0.051233	0.045712	0.076186	0.074854	0.089574	0.05934	0.056247	0.062692	0.064596	0.06231	0.06238	0.064939	0.0728	0.079592	0.066799	0.053632	0.076982	0.0758	0.079148	0.079458	0.071391	0.060843	0.054321	0.049228	0.064097	0.074648	0.054798	0.067841	0.048587	0.048101	0.051074	0.053944	0.060665	0.0624	0.041842	0.085149	0.068956	0.059725	0.058146	0.063052	0.045023	0.076547	0.084102
281.19	0.094315	0.09332	0.094864	0.077179	0.05735	0.052696	0.04628	0.077362	0.075442	0.092323	0.059415	0.057103	0.06374	0.064635	0.06286	0.06305	0.065037	0.072866	0.079387	0.066628	0.053689	0.075677	0.075502	0.07955	0.082319	0.07209	0.060952	0.05432	0.048779	0.064488	0.075401	0.056252	0.067318	0.048483	0.048904	0.051551	0.054461	0.060898	0.062195	0.041967	0.08542	0.069497	0.059614	0.058275	0.063274	0.045516	0.075814	0.080594
291.19	0.094257	0.093551	0.095152	0.076815	0.057743	0.053594	0.046107	0.077023	0.075987	0.092501	0.060265	0.057662	0.064006	0.065299	0.062757	0.063121	0.064421	0.072548	0.079743	0.066825	0.054704	0.075603	0.075898	0.080109	0.0794	0.071004	0.060918	0.056305	0.04979	0.065598	0.075012	0.057484	0.068076	0.048233	0.04849	0.051079	0.054316	0.060408	0.063145	0.041892	0.085752	0.069387	0.05959	0.058893	0.063408	0.045571	0.076306	0.08452
301.19	0.094166	0.093335	0.095468	0.07717	0.057237	0.054247	0.045958	0.077852	0.075533	0.093088	0.061356	0.057651	0.064644	0.065428	0.063191	0.064181	0.064085	0.072033	0.077593	0.066035	0.053683	0.07621	0.075976	0.079449	0.079641	0.071281	0.061018	0.055234	0.048124	0.062754	0.074047	0.056593	0.06822	0.047906	0.047828	0.050949	0.05454	0.060651	0.063078	0.042634	0.08592	0.069894	0.059907	0.058742	0.062465	0.044652	0.076257	0.083355
311.19	0.094158	0.092781	0.094824	0.076614	0.05692	0.053722	0.046496	0.078222	0.075058	0.091524	0.061206	0.056823	0.064761	0.065363	0.063	0.063821	0.06391	0.073048	0.077235	0.067033	0.053748	0.07701	0.074411	0.079837	0.080189	0.070653	0.062059	0.055439	0.049723	0.067157	0.074942	0.057201	0.068098	0.048644	0.048802	0.051705	0.054578	0.061355	0.063309	0.041656	0.085495	0.070278	0.059806	0.058404	0.063168	0.045635	0.076424	0.082687
321.19	0.094015	0.093352	0.095048	0.077722	0.057404	0.054317	0.04611	0.078699	0.075855	0.093522	0.062007	0.057186	0.064946	0.065442	0.063609	0.063879	0.06317	0.072078	0.076607	0.065834	0.052681	0.074854	0.074745	0.079842	0.078464	0.071343	0.060598	0.054984	0.047027	0.062351	0.073913	0.058395	0.067077	0.046493	0.048362	0.051649	0.054222	0.060698	0.061925	0.041786	0.084866	0.066776	0.059743	0.05766	0.061912	0.044779	0.075429	0.082814
331.19	0.093716	0.092408	0.094518	0.07721	0.057428	0.054982	0.046241	0.078873	0.075287	0.093885	0.062028	0.05715	0.064984	0.065125	0.063714	0.064658	0.063755	0.07275	0.077144	0.06657	0.052298	0.074921	0.07309	0.079231	0.078997	0.070737	0.059856	0.055642	0.047732	0.063259	0.073775	0.05669	0.067727	0.047833	0.048526	0.051408	0.054533	0.061136	0.062696	0.041708	0.084762	0.068639	0.059918	0.058297	0.062412	0.045672	0.075836	0.081569
341.19	0.094145	0.092878	0.093833	0.078167	0.058026	0.055669	0.046385	0.07879	0.076191	0.093422	0.062861	0.057969	0.065468	0.066134	0.064091	0.065934	0.063621	0.073586	0.07608	0.065363	0.052955	0.075449	0.073564	0.079006	0.078549	0.070512	0.06036	0.054319	0.046847	0.063272	0.073476	0.058583	0.066858	0.048203	0.04759	0.051241	0.05367	0.060213	0.062058	0.040522	0.0841	0.067958	0.059677	0.056638	0.061922	0.043767	0.07495	0.079139
351.19	0.093273	0.092845	0.094724	0.077589	0.057363	0.054818	0.045821	0.078861	0.075672	0.094208	0.062582	0.057574	0.06507	0.06575	0.06399	0.065492	0.06277	0.072381	0.075064	0.06432	0.05171	0.07434	0.073355	0.078679	0.078324	0.070469	0.060286	0.053638	0.047759	0.063628	0.073882	0.058849	0.066846	0.046909	0.047591	0.050571	0.053662	0.060424	0.0622	0.040842	0.084409	0.068389	0.059907	0.057034	0.0613	0.0443	0.074193	0.079458
361.19	0.092602	0.091338	0.093242	0.076884	0.056366	0.054647	0.04544	0.078665	0.075669	0.093167	0.062084	0.057301	0.064414	0.065622	0.064012	0.06471	0.062532	0.072215	0.075374	0.06534	0.052674	0.07406	0.07406	0.078196	0.077645	0.069873	0.059158	0.053223	0.048324	0.063584	0.073624	0.057929	0.066691	0.047293	0.048341	0.05062	0.053572	0.060856	0.060991	0.040965	0.084613	0.067732	0.059773	0.057261	0.061074	0.043898	0.075781	0.079668
371.19	0.092904	0.09157	0.093299	0.07766	0.055565	0.05458	0.045446	0.078665	0.075869	0.093522	0.062597	0.056792	0.064744	0.065524	0.06349	0.065383	0.062674	0.071806	0.075145	0.064884	0.05245	0.073998	0.072597	0.078247	0.078429	0.069712	0.059515	0.053615	0.047027	0.063098	0.073075	0.057874	0.066209	0.04817	0.047884	0.050628	0.053662	0.060514	0.061558	0.040684	0.084243	0.068071	0.060076	0.057549	0.060816	0.043764	0.075159	0.082449
381.19	0.093182	0.091487	0.094195	0.077235	0.05608	0.054443	0.045314	0.078122	0.075455	0.094368	0.062581	0.056778	0.064486	0.065253	0.063937	0.064915	0.062386	0.071982	0.074756	0.063998	0.051529	0.073921	0.074179	0.078453	0.077376	0.069724	0.05936	0.053907	0.048223	0.06307	0.073442	0.058892	0.066056	0.047706	0.047552	0.050602	0.052533	0.060051	0.061193	0.04032	0.084688	0.066427	0.059366	0.056632	0.060343	0.044034	0.075061	0.079433
391.19	0.093152	0.091326	0.093143	0.077421	0.05532	0.054865	0.04504	0.078981	0.076062	0.093877	0.063072	0.056591	0.064593	0.065101	0.063158	0.065386	0.06184	0.072034	0.073057	0.064899	0.051751	0.073402	0.073125	0.077566	0.078035	0.069606	0.058252	0.054209	0.046383	0.061375	0.07334	0.058636	0.065933	0.047702	0.046558	0.050435	0.052471	0.059477	0.06048	0.040096	0.08375	0.066033	0.059005	0.056149	0.059904	0.044344	0.075275	0.082279
401.19	0.092523	0.091618	0.093548	0.077049	0.055381	0.054578	0.045259	0.078172	0.075531	0.093626	0.062538	0.056512	0.064269	0.065283	0.063198	0.063638	0.060771	0.0712	0.073107	0.063719	0.051466	0.07241	0.073127	0.077523	0.076954	0.068712	0.057818	0.053941	0.045362	0.062133	0.072543	0.056572	0.065603	0.046131	0.047066	0.050019	0.052303	0.059509	0.060858	0.039812	0.083119	0.065574	0.058602	0.056131	0.059035	0.043272	0.074583	0.081368
411.19	0.091701	0.091231	0.092701	0.076856	0.05537	0.054546	0.044726	0.078546	0.074719	0.092779	0.062245	0.056645	0.063582	0.065272	0.062764	0.064138	0.061009	0.071229	0.072939	0.064195	0.050772	0.072479	0.073662	0.076934	0.077433	0.068071	0.057342	0.052298	0.045398	0.060002	0.072203	0.059156	0.06606	0.046166	0.04733	0.050715	0.052997	0.060022	0.061285	0.039434	0.083934	0.065995	0.058822	0.056718	0.059816	0.04457	0.07446	0.082417
Statistical data for rest Eapp
	Endogenous	DYRK2	DYRK2-D275N
	0.05604	0.053813	0.062466
	0.059905	0.047167	0.056258
	0.052536	0.061898	0.05401
	0.05566	0.05627	0.048756
	0.025115	0.066126	0.059491
	0.0087009	0.047998	0.0014677
	0.027485	0.055788	0.028077
	0.044895	0.05534	0.033919
	0.051432	0.059922	0.035072
	0.051406	0.053885	0.052782
	0.03182	0.051498	0.044503
	0.020457	0.061526	0.032345
	0.031124	0.044397	0.049848
	0.0336	0.056588	0.04294
	0.028686	0.053109	0.019301
	0.023171	0.050307	0.022143
	0.051095	0.049958	0.042282
	0.040099	0.039188	0.046759
	0.045058	0.042744	0.045911
	0.043504	0.042431	0.045786
	0.017114	0.039526	0.016178
	0.02909	0.044034	-0.019378
	0.0092172	0.038181	0.032284
	0.015296	0.043683	0.023
	0.023098	0.041983	0.02663
	0.012895	0.053123	0.023566
	0.015095	0.061563	0.019782
	0.041057	0.055589	0.01624
	0.046239	0.057837	0.031961
	0.037462	0.051592	0.039807
	0.042882	0.051282	0.034361
	0.00063089	0.048677	0.039215
	0.036199	0.041669	0.024357
	0.029091	0.048085	0.042716
	0.04819	0.041356	0.032706
	0.029333	0.036486	0.035016
	0.048469	0.042453	0.045034
	0.046678	0.050105	0.046941
	0.05262	0.050307	0.053871
	0.032519	0.048188	0.061071
	0.031522	0.046426	0.059199
	0.023216	0.052101	0.063044
	0.04255	0.047207	0.04589
	0.032975	0.046708	0.038097
	0.037199	0.056032	0.054142
	0.0339	0.069339	0.054133
	0.046446	0.040941	0.045791
	-0.0028214	0.060635	0.04228
	0.051535	0.070003	0.046941
	0.010944	0.065839	0.031594
	0.0011847	0.058337	0.032686
	0.029963	0.057181	0.031365
	0.046148	0.028831	0.035115
	0.047132	0.051202	0.03332
	0.035198	0.045105	0.027963
	0.029965	0.060781	0.02306
	0.034483	0.064553	0.0393
	0.03715	0.05343	0.036876
	0.033316	0.026797	0.032905
	0.040587	0.051059	0.056746
	0.049519	0.035068	0.047346
	0.038744	0.06512	0.062771
	0.014694	0.061849	0.029149
	0.052346	0.04626	0.021991
	0.04022	0.065986	0.053633
	0.037614	0.056233	0.04714
	0.034202	0.053014	0.044776
	0.027485	0.049752	0.05316
	0.035017	0.064083	0.046235
	0.016741	0.058535	0.03489
	0.033102	0.051365	0.045347
	0.040998	0.051388	0.047658
	0.028738	0.064475	0.057364
	0.029055	0.059171	0.051269
	0.033577	0.06103	0.053397
	0.010446	0.051006	0.058847
	0.040847	0.056598	0.04978
	0.040436	0.061095	0.047648
	0.020062	0.058071	0.05432
	0.060488	0.069529	0.050513
	0.039722	0.065253	0.032112
	0.039626	0.057056	0.051782
	0.028293	0.047639	0.037388
	0.02675	0.048959	0.025844
	0.0054853	0.053596	0.016441
	0.043356	0.046124	0.021308
	0.052811	0.053351	0.059105
	0.054874	0.05628	0.03877
	0.050316	0.052354	0.020487
	0.059725	0.045621	0.032285
	0.061179	0.049319	0.032408
	0.042201	0.0482	0.02813
	0.037299	0.045376	0.010186
	0.038537	0.045711	0.014776
	0.026021	0.056007	0.0099804
	0.035543	0.054758	0.0384
	0.015617	0.054852	0.013858
	0.034936	0.04677	0.02964
	0.037763	0.056109	0.041064
	0.023786	0.029048	0.053452
	0.029484	0.022427	0.046286
	0.025404	0.038909	0.037182
	0.052814	0.031665	0.010705
	0.057864		0.028588
	0.050871		0.00088806
	0.007218		0.060065
	0.060285		0.036304
	0.047456		0.053037
	0.054643
	0.047162
	0.059576
	0.053684
[truncated: 96 more columns]

## Sheet: Fig H
Fig G FRET responses between STIM11-491-YFP and CFP-Orai1
	Eapp
Time [s]	Endogenous																			DYRK2
0	0.085414	0.078102	0.11316	0.062339	0.044963	0.065934	0.05771	0.045318	0.061086	0.058936	0.084843	0.06193	0.10944	0.11249	0.082473	0.067298	0.059691	0.071225		0.064277	0.085159	0.076596	0.068847	0.082987	0.070658	0.10005	0.090936	0.081027	0.063823	0.072863	0.054378	0.086961	-0.0036642	0.083046	0.069771	0.080344	0.085449	0.10606	0.10761	0.093421	0.055818	0.096075	0.055023	0.051473	0.076503	0.039287	0.11567	0.074547
10	0.08514	0.076617	0.11099	0.062843	0.044263	0.06756	0.056641	0.043629	0.062587	0.058541	0.084742	0.062621	0.10966	0.11012	0.081855	0.066561	0.059377	0.069915		0.065445	0.086981	0.082974	0.069776	0.08412	0.071271	0.10056	0.09214	0.081415	0.061714	0.075003	0.052634	0.086881	7.1926e-05	0.083833	0.071124	0.081113	0.085376	0.10686	0.10779	0.095114	0.060499	0.09593	0.053231	0.052675	0.077383	0.039147	0.11579	0.075957
20	0.087008	0.078404	0.11172	0.063745	0.042984	0.067717	0.055833	0.043045	0.061865	0.059657	0.083966	0.062371	0.10838	0.11014	0.081601	0.067251	0.059474	0.069945		0.064486	0.08854	0.083726	0.068648	0.084464	0.072446	0.099707	0.093027	0.07875	0.06273	0.074457	0.052508	0.088562	-0.0010503	0.086135	0.069784	0.081538	0.086058	0.10732	0.10775	0.094269	0.056493	0.096322	0.054979	0.051953	0.077126	0.039007	0.11603	0.076713
30	0.087432	0.077426	0.1102	0.06303	0.042316	0.068726	0.055857	0.043448	0.061634	0.058483	0.084337	0.062662	0.10861	0.11032	0.081392	0.06667	0.059001	0.069759		0.065161	0.088205	0.084279	0.070113	0.083076	0.071607	0.10136	0.094588	0.083524	0.072131	0.078914	0.056022	0.08908	0.0035841	0.086362	0.069967	0.081367	0.087509	0.10643	0.10657	0.093327	0.0532	0.094875	0.050437	0.04965	0.07659	0.036792	0.11577	0.072814
40.001	0.087369	0.076783	0.11244	0.063323	0.042405	0.068376	0.05433	0.044142	0.06303	0.060108	0.084429	0.062677	0.10852	0.11179	0.081899	0.06682	0.058734	0.070261		0.060989	0.087292	0.082562	0.07048	0.085748	0.069297	0.10111	0.096019	0.076386	0.062203	0.074302	0.055415	0.0878	0.0072167	0.084407	0.068604	0.080362	0.087564	0.10734	0.10808	0.093719	0.056853	0.098529	0.054725	0.053651	0.077428	0.037038	0.11609	0.075325
50.001	0.088012	0.077886	0.11	0.064802	0.041268	0.069175	0.057025	0.045381	0.061479	0.061066	0.083663	0.062715	0.10874	0.11075	0.080651	0.066787	0.05907	0.071792		0.060608	0.087273	0.080242	0.070828	0.082234	0.071742	0.10043	0.095532	0.07503	0.068644	0.074756	0.054478	0.087096	0.0024033	0.087313	0.070746	0.080159	0.087396	0.10637	0.1077	0.093797	0.053612	0.095672	0.053837	0.051448	0.076657	0.035957	0.11532	0.073107
60.002	0.088232	0.074365	0.10939	0.065135	0.039957	0.068809	0.055136	0.045407	0.062884	0.058775	0.08353	0.061937	0.10827	0.10993	0.080817	0.066575	0.058662	0.070651		0.059355	0.087136	0.080149	0.069053	0.083839	0.068137	0.099954	0.096169	0.070449	0.059693	0.077994	0.052835	0.087963	0.0028448	0.087462	0.069345	0.079744	0.086986	0.10494	0.10692	0.094053	0.051804	0.097378	0.053789	0.049851	0.076204	0.036116	0.11572	0.071684
70.002	0.088005	0.076926	0.11134	0.066735	0.039397	0.069449	0.058143	0.046641	0.063778	0.06111	0.083119	0.062819	0.10946	0.11095	0.082075	0.067051	0.059668	0.071652		0.059656	0.084569	0.079942	0.070854	0.081317	0.067813	0.099744	0.096021	0.074224	0.060809	0.07573	0.05375	0.088121	0.0057311	0.086394	0.069639	0.078703	0.085553	0.10635	0.10788	0.092948	0.052393	0.095694	0.055997	0.050032	0.076078	0.036796	0.11582	0.071657
80.003	0.084937	0.07375	0.1092	0.065635	0.038009	0.069439	0.053339	0.041899	0.063346	0.058817	0.082768	0.061672	0.10793	0.1096	0.080526	0.065782	0.058412	0.070341		0.06053	0.087676	0.079955	0.070069	0.083415	0.069125	0.10062	0.096804	0.072076	0.063187	0.078737	0.055631	0.086197	0.0012099	0.087607	0.068127	0.079734	0.086564	0.1068	0.10739	0.093461	0.053752	0.09537	0.059678	0.050758	0.076777	0.036987	0.1168	0.071021
90.003	0.087301	0.074938	0.10932	0.067558	0.038321	0.0709	0.057369	0.044543	0.062348	0.059115	0.081989	0.063233	0.10966	0.11037	0.08168	0.066291	0.059871	0.070261		0.056666	0.077033	0.075201	0.065855	0.085638	0.066551	0.095098	0.094182	0.065199	0.064001	0.075166	0.053889	0.084396	0.0054728	0.083124	0.063986	0.077168	0.084041	0.10575	0.10676	0.093197	0.041107	0.092892	0.059292	0.044394	0.074091	0.038099	0.11461	0.075359
118.82	0.090721	0.067039	0.10222	0.069183	0.036606	0.064457	0.052873	0.033446	0.062565	0.057997	0.07828	0.060598	0.10844	0.10947	0.078842	0.066219	0.058971	0.069921		0.0559	0.079359	0.074034	0.066956	0.085289	0.066472	0.097494	0.0959	0.069981	0.064837	0.073609	0.05288	0.086152	0.0015019	0.087178	0.062505	0.078367	0.083947	0.10568	0.10656	0.092919	0.043457	0.093062	0.060627	0.044802	0.073556	0.036982	0.11468	0.074634
128.82	0.090517	0.066458	0.10423	0.068081	0.035257	0.061775	0.049151	0.034783	0.065475	0.059982	0.079813	0.062566	0.11132	0.11282	0.080493	0.068278	0.060324	0.070928		0.056171	0.081976	0.075568	0.069223	0.085056	0.067879	0.097849	0.095797	0.072052	0.074811	0.081117	0.054327	0.086921	0.0016062	0.092893	0.06823	0.080188	0.086698	0.10769	0.10886	0.097893	0.063899	0.10547	0.066845	0.049062	0.074626	0.04486	0.11554	0.082563
138.82	0.092293	0.06988	0.10252	0.068976	0.03636	0.063229	0.047564	0.036376	0.067006	0.060423	0.081946	0.06353	0.1118	0.11274	0.080349	0.070057	0.061296	0.071832		0.054852	0.085391	0.078166	0.072926	0.086267	0.072415	0.099598	0.097309	0.072178	0.083532	0.085449	0.056821	0.088458	0.0025779	0.10157	0.080543	0.084021	0.090781	0.10887	0.11342	0.10528	0.088872	0.12316	0.067588	0.054649	0.076885	0.052017	0.11461	0.093953
148.82	0.092744	0.086065	0.10346	0.069225	0.03765	0.066766	0.050435	0.038293	0.067789	0.059998	0.081551	0.063552	0.11492	0.11754	0.081062	0.070732	0.062079	0.070246		0.059681	0.089773	0.07936	0.078371	0.088274	0.080059	0.10399	0.10107	0.075416	0.078624	0.09139	0.061053	0.090824	0.0089592	0.10159	0.093843	0.090846	0.093517	0.11186	0.11927	0.11128	0.10961	0.13912	0.074398	0.061188	0.081014	0.060858	0.11599	0.10663
158.82	0.096398	0.093783	0.10461	0.078808	0.039981	0.075547	0.060922	0.045832	0.066622	0.058689	0.08281	0.066402	0.11896	0.12423	0.082199	0.073773	0.065079	0.072426		0.062992	0.091746	0.079736	0.084114	0.0894	0.086383	0.10753	0.10262	0.076194	0.079779	0.096199	0.066529	0.092828	0.013636	0.10357	0.099599	0.096967	0.095328	0.11585	0.12879	0.11941	0.12981	0.14984	0.078149	0.064488	0.088246	0.065884	0.11635	0.11813
168.82	0.10485	0.10201	0.11022	0.089108	0.045101	0.086779	0.07339	0.055948	0.067975	0.058453	0.087188	0.072065	0.12286	0.1314	0.084616	0.079589	0.072148	0.078366		0.064912	0.095268	0.083847	0.085844	0.09078	0.089076	0.11203	0.10684	0.079519	0.07921	0.10317	0.068916	0.096369	0.016563	0.10501	0.10412	0.10134	0.094663	0.11894	0.13938	0.12798	0.14046	0.15712	0.080191	0.067914	0.094739	0.069877	0.11757	0.1261
178.82	0.11408	0.099959	0.1117	0.099637	0.048892	0.09506	0.084565	0.067469	0.069017	0.057516	0.090413	0.07901	0.12556	0.13481	0.086105	0.086193	0.080157	0.08659		0.066331	0.095464	0.085433	0.089435	0.093094	0.089917	0.11673	0.10771	0.081292	0.07512	0.10802	0.073023	0.099888	0.016124	0.10606	0.1053	0.10459	0.098372	0.1222	0.14575	0.13272	0.14954	0.15832	0.079203	0.072734	0.10071	0.070639	0.11768	0.12984
188.82	0.12208	0.10492	0.11889	0.10667	0.055278	0.10475	0.094214	0.078478	0.071814	0.060607	0.094981	0.085098	0.12823	0.13761	0.088299	0.094235	0.088629	0.094389		0.063474	0.096077	0.087148	0.090533	0.093837	0.090659	0.12036	0.11111	0.082983	0.072924	0.10921	0.076328	0.10279	0.012449	0.10617	0.11155	0.10878	0.10161	0.12357	0.15031	0.13757	0.15487	0.16265	0.078925	0.076736	0.10543	0.071697	0.11836	0.13256
198.82	0.12645	0.10518	0.12085	0.11041	0.056762	0.1098	0.099538	0.085894	0.076012	0.062002	0.09607	0.088775	0.12987	0.14118	0.0896	0.098106	0.093644	0.099849		0.061494	0.09857	0.08927	0.091679	0.097254	0.089025	0.12351	0.11468	0.085106	0.073054	0.11139	0.077714	0.10245	0.013503	0.10845	0.11313	0.11043	0.10122	0.12517	0.15298	0.14083	0.1585	0.16383	0.078511	0.077598	0.10864	0.071751	0.11805	0.13556
208.82	0.12338	0.10462	0.11971	0.11332	0.056092	0.11131	0.10258	0.088946	0.076616	0.063151	0.096511	0.090504	0.12884	0.13954	0.088951	0.10029	0.095414	0.10083		0.059345	0.096923	0.088617	0.091615	0.096185	0.089924	0.1252	0.11445	0.087407	0.069001	0.11104	0.080734	0.1018	0.0065581	0.1091	0.11617	0.11089	0.10004	0.12503	0.15235	0.143	0.16043	0.16408	0.078914	0.077399	0.11075	0.071991	0.1187	0.13641
218.82	0.12601	0.10684	0.12192	0.11447	0.057203	0.11477	0.10333	0.092936	0.077648	0.06626	0.097656	0.091795	0.13125	0.13909	0.090533	0.10318	0.099062	0.10428		0.056737	0.096319	0.089407	0.0923	0.096972	0.090607	0.12654	0.1148	0.087884	0.06899	0.11182	0.081937	0.10204	0.0051962	0.11005	0.11866	0.11243	0.10352	0.12566	0.15376	0.14584	0.1619	0.166	0.07947	0.077807	0.11185	0.073934	0.1185	0.13591
228.82	0.12236	0.10907	0.12166	0.11526	0.058194	0.11575	0.10159	0.096525	0.079219	0.069282	0.097528	0.092449	0.13133	0.1406	0.089896	0.10419	0.099889	0.10478		0.056739	0.097565	0.090874	0.092903	0.1027	0.087948	0.12696	0.11391	0.086275	0.068264	0.11214	0.082267	0.10129	0.00024777	0.10868	0.11719	0.1132	0.10305	0.12608	0.15357	0.14816	0.16369	0.16723	0.077129	0.077482	0.11345	0.074592	0.11869	0.13931
238.82	0.12466	0.10689	0.12284	0.11806	0.059909	0.11776	0.10261	0.097866	0.081378	0.070023	0.097664	0.093763	0.13285	0.14174	0.090526	0.10665	0.10209	0.1062		0.057633	0.09689	0.091214	0.094528	0.10075	0.088473	0.12785	0.11356	0.086718	0.068887	0.11276	0.08313	0.10336	0.0010959	0.10993	0.11862	0.11355	0.10249	0.12621	0.15527	0.14876	0.16323	0.17007	0.078067	0.079841	0.11461	0.075132	0.12092	0.14156
248.82	0.12417	0.1069	0.12116	0.11731	0.057627	0.11808	0.098892	0.097466	0.0789	0.069857	0.096492	0.094973	0.13237	0.14042	0.089738	0.10571	0.10212	0.10631		0.055694	0.098638	0.091003	0.095162	0.10333	0.086492	0.12903	0.11288	0.08901	0.069452	0.11512	0.082859	0.10232	-0.00044747	0.10979	0.1181	0.11506	0.10176	0.12645	0.15576	0.14903	0.16472	0.17066	0.078901	0.075425	0.11536	0.07498	0.12048	0.1423
258.82	0.12273	0.10667	0.12262	0.11553	0.05818	0.11746	0.098634	0.10038	0.079747	0.07067	0.097183	0.09503	0.13296	0.13891	0.089934	0.10819	0.10354	0.10764		0.056728	0.09862	0.090752	0.095292	0.10385	0.088647	0.1291	0.11255	0.085109	0.071022	0.11304	0.082815	0.10162	0.0020193	0.10918	0.11891	0.11393	0.10107	0.12654	0.15626	0.15034	0.16599	0.1696	0.078569	0.075661	0.11486	0.074433	0.1202	0.14353
268.82	0.12134	0.10696	0.12474	0.11743	0.059797	0.11858	0.1001	0.099807	0.082033	0.071854	0.097922	0.096539	0.13216	0.13961	0.08994	0.10849	0.10458	0.1087		0.055211	0.097757	0.090999	0.097276	0.10267	0.087626	0.12997	0.11433	0.086982	0.071116	0.11532	0.083855	0.10212	0.0011479	0.11087	0.11882	0.11497	0.10159	0.12705	0.16109	0.15275	0.16919	0.17582	0.07331	0.07659	0.1166	0.074127	0.12165	0.14682
278.82	0.12242	0.10465	0.12464	0.11701	0.059437	0.11924	0.097827	0.10141	0.081107	0.072529	0.097201	0.09725	0.13384	0.13929	0.090333	0.10882	0.10534	0.10982		0.058816	0.098235	0.093298	0.096499	0.10572	0.086114	0.13105	0.1156	0.087681	0.074156	0.11603	0.082496	0.10165	0.0083369	0.11157	0.11954	0.11492	0.10139	0.12792	0.16181	0.15186	0.17192	0.17536	0.074526	0.077187	0.11714	0.072225	0.1212	0.15082
288.82	0.1264	0.10715	0.12696	0.11628	0.060525	0.12089	0.096336	0.10266	0.082977	0.07506	0.097985	0.097059	0.13443	0.14043	0.090978	0.10993	0.10686	0.11117		0.063799	0.099299	0.091525	0.097474	0.10277	0.087591	0.13007	0.11476	0.086754	0.074312	0.11805	0.083122	0.10045	0.011511	0.11152	0.11848	0.11516	0.10218	0.12756	0.16283	0.15144	0.17315	0.17423	0.071108	0.077097	0.11684	0.072352	0.12085	0.14922
298.82	0.1263	0.10682	0.12543	0.11989	0.061563	0.12015	0.09881	0.10215	0.082294	0.07578	0.097461	0.098281	0.13353	0.14111	0.090652	0.11048	0.1073	0.11213		0.061768	0.099426	0.093365	0.099797	0.10148	0.089184	0.13305	0.11372	0.088572	0.077153	0.11847	0.083751	0.10067	0.013688	0.11289	0.12009	0.11624	0.10253	0.12963	0.16385	0.15489	0.1768	0.17748	0.073221	0.076195	0.11931	0.073924	0.12301	0.1569
308.82	0.12068	0.1025	0.12595	0.11639	0.059824	0.12074	0.096953	0.10134	0.082426	0.075494	0.097004	0.09917	0.13429	0.14047	0.090028	0.11131	0.10779	0.11349		0.065709	0.097897	0.094128	0.09864	0.10266	0.090768	0.13257	0.1147	0.087404	0.077193	0.11696	0.082003	0.099557	0.017186	0.11495	0.12085	0.11638	0.10184	0.12983	0.16383	0.15652	0.17984	0.17502	0.07225	0.075935	0.11836	0.074009	0.12255	0.15451
318.82	0.12396	0.10653	0.12668	0.11775	0.062451	0.12222	0.10007	0.10171	0.083887	0.075595	0.09773	0.10042	0.13463	0.14029	0.091744	0.11225	0.1088	0.11446		0.065941	0.098503	0.094876	0.099875	0.10071	0.093336	0.13297	0.11656	0.090985	0.079154	0.11785	0.082348	0.10125	0.021038	0.11648	0.12028	0.11691	0.10385	0.13006	0.16467	0.15681	0.17921	0.17445	0.073792	0.074264	0.11807	0.073536	0.12227	0.15447
328.82	0.1256	0.10591	0.12919	0.11968	0.062364	0.12335	0.099621	0.10238	0.083019	0.076979	0.098153	0.10206	0.13597	0.14186	0.092295	0.1119	0.11021	0.11479		0.064496	0.098074	0.090967	0.098106	0.099097	0.09132	0.13363	0.11588	0.090108	0.078488	0.11778	0.082662	0.10069	0.016871	0.11419	0.11865	0.11722	0.10339	0.1289	0.16608	0.15784	0.17757	0.16877	0.074506	0.075146	0.11813	0.074011	0.12139	0.15794
338.82	0.12562	0.10474	0.12913	0.11899	0.061627	0.12407	0.096153	0.10133	0.08359	0.076614	0.09863	0.10211	0.1344	0.14084	0.09124	0.11287	0.10998	0.1153		0.06304	0.097713	0.093046	0.10202	0.099	0.093048	0.13505	0.11541	0.090126	0.080782	0.11698	0.084626	0.10143	0.014205	0.11538	0.11958	0.11734	0.10437	0.13002	0.16816	0.15692	0.1831	0.17063	0.074837	0.079323	0.11823	0.074278	0.12188	0.16083
348.82	0.13018	0.11183	0.13115	0.12008	0.062057	0.12736	0.099066	0.10356	0.084554	0.077875	0.098906	0.1027	0.1358	0.14223	0.092675	0.11431	0.11196	0.11791		0.064607	0.097113	0.094388	0.099941	0.098255	0.092926	0.13445	0.11675	0.091626	0.079926	0.11842	0.084108	0.10029	0.013622	0.11314	0.11765	0.11672	0.10469	0.13074	0.1685	0.15928	0.18311	0.16839	0.071837	0.074504	0.11822	0.073972	0.12187	0.15914
358.82	0.12305	0.11026	0.13058	0.11782	0.062358	0.12544	0.096883	0.10017	0.083907	0.076248	0.097441	0.10131	0.13611	0.14034	0.09156	0.11374	0.11175	0.11707		0.066328	0.096928	0.091267	0.10248	0.10019	0.093323	0.13568	0.1165	0.095269	0.081714	0.11917	0.083754	0.10154	0.012987	0.11599	0.11791	0.11758	0.10508	0.12983	0.16553	0.15921	0.18157	0.168	0.074353	0.075233	0.11865	0.074111	0.12206	0.15796
368.83	0.12346	0.10589	0.13151	0.11954	0.062585	0.12655	0.097866	0.10196	0.082368	0.078511	0.09864	0.10163	0.13648	0.14327	0.091373	0.11431	0.11232	0.11852		0.064601	0.0996	0.094563	0.10289	0.099578	0.094798	0.13632	0.11724	0.094262	0.085296	0.1186	0.084886	0.10166	0.013991	0.11694	0.11727	0.11793	0.10449	0.1287	0.16577	0.15765	0.18221	0.1699	0.074817	0.073869	0.1188	0.074412	0.12185	0.15827
378.83	0.12631	0.11561	0.13444	0.1196	0.063576	0.12669	0.098734	0.1022	0.085182	0.077398	0.09814	0.10523	0.1382	0.14362	0.091609	0.11524	0.11245	0.11974		0.060865	0.097889	0.092511	0.10077	0.098971	0.094321	0.13681	0.11752	0.095162	0.086062	0.11853	0.085206	0.10146	0.010355	0.11657	0.11709	0.11744	0.10447	0.13094	0.1696	0.15777	0.18362	0.16764	0.0748	0.07472	0.11947	0.075326	0.12239	0.16351
388.83	0.1321	0.11234	0.1376	0.12167	0.062184	0.12721	0.10063	0.099358	0.084877	0.076391	0.097856	0.10417	0.13863	0.14413	0.092371	0.1156	0.11379	0.11983		0.060439	0.099827	0.095929	0.10222	0.097765	0.095208	0.13868	0.11896	0.096521	0.08592	0.1198	0.084725	0.10192	0.012878	0.1191	0.11828	0.11852	0.10369	0.13082	0.16848	0.16073	0.18724	0.17134	0.072956	0.074311	0.11915	0.075003	0.12265	0.16352
398.83	0.12266	0.11297	0.13396	0.12014	0.062679	0.12649	0.097012	0.098613	0.087314	0.077141	0.098353	0.10499	0.13744	0.14348	0.091423	0.11608	0.11327	0.11926		0.064051	0.098263	0.093235	0.10268	0.098423	0.095987	0.1381	0.11942	0.094137	0.086084	0.11861	0.084298	0.10157	0.009804	0.11992	0.11742	0.11951	0.10355	0.13077	0.16886	0.1602	0.18806	0.17321	0.072885	0.074899	0.11953	0.075179	0.12369	0.16487
408.83	0.12549	0.11189	0.13811	0.11999	0.063992	0.12941	0.09829	0.098352	0.086461	0.076737	0.09837	0.10512	0.13739	0.14409	0.091976	0.11545	0.11393	0.11996		0.061883	0.098437	0.094964	0.10225	0.097906	0.096558	0.13855	0.12089	0.095323	0.088138	0.1206	0.086137	0.10387	0.013058	0.11919	0.11967	0.11914	0.1053	0.1318	0.16782	0.16098	0.1877	0.17252	0.073039	0.070056	0.11979	0.073479	0.12286	0.16262
418.83	0.11997	0.11751	0.1387	0.12114	0.064248	0.12845	0.10069	0.09897	0.086233	0.077792	0.098215	0.10658	0.13882	0.14489	0.092449	0.11737	0.1141	0.11987		0.064721	0.099088	0.095791	0.10556	0.098794	0.096642	0.13975	0.12151	0.097044	0.088448	0.11957	0.087073	0.10513	0.01565	0.12166	0.1201	0.12053	0.10689	0.13179	0.17205	0.16106	0.18973	0.17169	0.072974	0.071055	0.11996	0.073496	0.12283	0.16444
428.83	0.1256	0.11587	0.14131	0.11622	0.063267	0.12924	0.098258	0.098482	0.085083	0.07676	0.097976	0.10598	0.13931	0.14406	0.091671	0.1171	0.11465	0.12026		0.065692	0.098284	0.093565	0.10406	0.10055	0.093524	0.13965	0.12057	0.095149	0.088651	0.12078	0.086018	0.1037	0.012051	0.12306	0.11992	0.11937	0.10646	0.13103	0.16981	0.16083	0.18891	0.17403	0.072767	0.074033	0.11965	0.072878	0.1225	0.16292
438.83	0.12888	0.11768	0.13877	0.11684	0.062239	0.12947	0.10138	0.09775	0.084487	0.077607	0.098145	0.10652	0.13968	0.14479	0.091638	0.11727	0.11513	0.12179		0.060595	0.09783	0.095998	0.10733	0.099487	0.096523	0.13884	0.12114	0.096093	0.089699	0.1183	0.085711	0.1041	0.015957	0.12188	0.12068	0.11865	0.10464	0.13046	0.16643	0.16118	0.18474	0.1716	0.072097	0.071658	0.11976	0.073415	0.12271	0.16291
448.83	0.12886	0.11684	0.14034	0.1188	0.06077	0.13074	0.10164	0.095718	0.086476	0.076536	0.097943	0.10784	0.14007	0.14649	0.091205	0.11781	0.11556	0.12139		0.066029	0.097498	0.092721	0.10248	0.099777	0.096937	0.13813	0.12118	0.1024	0.088491	0.12138	0.084501	0.10277	0.016392	0.12292	0.11787	0.1196	0.10649	0.13619	0.17397	0.16694	0.19568	0.18186	0.083065	0.080833	0.12626	0.080232	0.12768	0.17231
458.83	0.13252	0.11585	0.14535	0.12214	0.061427	0.13168	0.10455	0.097282	0.086423	0.077241	0.097623	0.10767	0.14213	0.14811	0.091596	0.11893	0.11598	0.12246		0.069298	0.097018	0.094598	0.10615	0.098077	0.098082	0.14026	0.12154	0.097837	0.089662	0.11858	0.084064	0.10313	0.024081	0.12324	0.1177	0.12047	0.10691	0.1316	0.1708	0.16314	0.18443	0.17087	0.074065	0.075464	0.12052	0.072507	0.12375	0.16403
Statistical data for rest Eapp
	Endogenous	DYRK2	DYRK2-D275N
	0.086885	0.062082	0.046742
	0.076519	0.08674	0.035424
	0.11078	0.08094	0.098175
	0.064515	0.06989	0.097711
	0.041388	0.083243	0.035199
	0.068609	0.070028	0.045122
	0.056138	0.10025	0.046217
	0.044345	0.094797	0.083355
	0.062404	0.076541	0.10819
	0.059461	0.064115	0.044166
	0.083739	0.07617	0.089645
	0.062464	0.054052	0.029196
	0.10887	0.08741	0.028295
	0.11065	0.0022226	0.087186
	0.081497	0.085798	0.095727
	0.066709	0.069395	0.088542
	0.059196	0.080118	0.084551
	0.07058	0.086294	0.093439
	0.11917	0.10243	0.10132
	0.10356	0.10485	0.078123
	0.091353	0.094243	0.076093
	0.082871	0.066912	0.057812
	0.058434	0.10125	0.050821
	0.083012	0.065073	0.097373
	0.052793	0.058138	0.07608
	0.070373	0.073868	0.087296
	0.058419	0.045173	0.10766
	0.05413	0.11041	0.095816
	0.066986	0.080628	0.08938
	0.049696	0.10472	0.09436
	0.053255	0.10209	0.083857
	0.099929	0.11298	0.10054
	0.1042	0.086255	0.07685
	0.11062	0.077578	0.048686
	0.086396	0.084747	0.060271
	0.081162	0.09412	0.07474
	0.10701	0.095808	0.082779
	0.056836	0.078556	0.10513
	0.068377	0.086862	0.090748
	0.096909	0.10539	0.10565
	0.076658	0.068814	0.087421
	0.095269	0.077158	0.055498
	0.10598	0.082935	0.03881
	0.094254	0.12226	0.036876
	0.09824	0.14205	0.061179
	0.045605	0.092206	0.062351
	0.092435	0.092034	0.05329
	0.067596	0.14183	0.051104
	0.074744	0.14335	0.058488
	0.060022	0.10509	0.061831
	0.081751	0.10949	0.02118
	0.078909	0.093302	0.078777
	0.057247	0.089588	0.088974
	0.073693	0.078097	0.075659
	0.075008	0.06678	0.10941
	0.065721	0.071945	0.11459
	0.063401	0.094501	0.10507
	0.1052	0.032325	0.037174
	0.07896	0.026557	0.018751
	0.089743	0.093774	0.08738
	0.091274	0.05952	0.10231
	0.099393	0.088401	0.087969
	0.10574	0.094739	0.093439
	0.074907	0.11317	0.093369
	0.15505	0.13029	0.069025
	0.092256	0.086869	0.089326
	0.087801	0.08328	0.094
		0.11171	0.085638
		0.099283	0.083382
		0.091204	0.070412
		0.038725	0.082315
		0.068667	0.090119
		0.075719	0.10626
		0.09515	0.1093
		0.097536	0.11284
		0.049677	0.12032
		0.064052	0.10548
		0.065964	0.11159
		0.10656	0.12461
		0.092091	0.13542
			0.09322
			0.079945
			0.071019
			0.077375
			0.098439
			0.12282
			0.1214
			0.16133
			0.14486
			0.018064
			0.068126
			0.095326
			0.12377
			0.10029
			0.087663
			0.028265
			0.10505
			0.082871
			0.067538
			0.094008
			0.10299
			0.080363
[truncated: 44 more columns]

## Sheet: Fig I
Fig I FRET responses between STIM1-YFP/STIM1-10M-YFP and CFP-Orai1
	Eapp
Time [s]	STIM1																			DYRK2+STIM1																			DYRK2+STIM1-10M
0	0.099275	0.078119	0.098452	0.08906	0.094302	0.089596	0.099932	0.086733	0.08324	0.08568	0.085154	0.10743	0.098281	0.11402	0.10666	0.075985	0.081659	0.1022		0.08503	0.080975	0.09688	0.11838	0.10079	0.086973	0.12543	0.10702	0.1137	0.11375	0.12161	0.094859	0.12004	0.12361	0.1707	0.12436	0.11315	0.14099		0.10805	0.083704	0.080011	0.059139	0.06581	0.073915	0.096526	0.12165	0.093912	0.10032	0.13483
10	0.10129	0.078691	0.098678	0.089165	0.09536	0.090532	0.10079	0.088739	0.084766	0.085815	0.084382	0.1062	0.09481	0.11368	0.10426	0.073956	0.080658	0.099127		0.082415	0.07843	0.095675	0.11838	0.10129	0.085099	0.12259	0.10704	0.1144	0.11044	0.12203	0.094574	0.11673	0.12344	0.17225	0.12222	0.11096	0.14038		0.10921	0.084236	0.083254	0.056042	0.064596	0.077335	0.096133	0.12197	0.093066	0.099677	0.13343
20.002	0.10058	0.079853	0.099017	0.087431	0.095871	0.090436	0.10035	0.087463	0.084131	0.085505	0.085899	0.10708	0.093587	0.11406	0.10389	0.073254	0.080175	0.099044		0.083211	0.0808	0.096252	0.11778	0.10181	0.085634	0.1208	0.10702	0.11194	0.11149	0.12013	0.094478	0.1159	0.12343	0.17087	0.12387	0.11289	0.14068		0.10475	0.082685	0.081671	0.058208	0.064168	0.076749	0.096602	0.11962	0.093903	0.099861	0.13323
30.001	0.10085	0.080935	0.098042	0.088834	0.095516	0.089701	0.10067	0.084244	0.084703	0.086151	0.087033	0.10899	0.092979	0.1109	0.10427	0.073465	0.079895	0.098911		0.081638	0.079951	0.093782	0.11722	0.1016	0.085114	0.12163	0.10727	0.11	0.11154	0.12188	0.094358	0.11598	0.12405	0.17113	0.12044	0.11362	0.14031		0.10596	0.082156	0.081248	0.057335	0.066544	0.075987	0.096644	0.12016	0.091591	0.099058	0.13223
40.002	0.099983	0.079723	0.097176	0.085254	0.094244	0.088836	0.10358	0.084511	0.084403	0.085547	0.08471	0.10736	0.093187	0.11109	0.10381	0.072982	0.0795	0.097998		0.082707	0.081818	0.091985	0.11778	0.10097	0.086898	0.12103	0.10824	0.11008	0.11045	0.12026	0.094696	0.11643	0.12533	0.17093	0.1196	0.11321	0.13915		0.10281	0.082735	0.080409	0.056884	0.064382	0.074209	0.095163	0.11878	0.090289	0.097531	0.13244
50.003	0.10009	0.081703	0.098503	0.087876	0.095942	0.089189	0.10217	0.084166	0.084341	0.085101	0.084298	0.10833	0.095183	0.11215	0.10393	0.074316	0.080829	0.10045		0.086227	0.080523	0.092563	0.11868	0.10219	0.0844	0.12242	0.10797	0.10825	0.11035	0.1209	0.093759	0.11462	0.12438	0.17248	0.12132	0.11352	0.13906		0.10507	0.083402	0.079182	0.059014	0.061698	0.06892	0.097805	0.11895	0.091304	0.098616	0.13131
60.002	0.099324	0.079939	0.097043	0.086303	0.095486	0.088119	0.10118	0.086096	0.083318	0.085159	0.085022	0.10911	0.09383	0.11098	0.10356	0.071426	0.079491	0.099411		0.083977	0.078245	0.092748	0.11926	0.10077	0.086731	0.12122	0.10871	0.1092	0.11061	0.11852	0.09392	0.11852	0.12522	0.1689	0.1225	0.11239	0.13874		0.10644	0.082426	0.076253	0.056186	0.06497	0.074389	0.095798	0.11707	0.093592	0.097016	0.13143
70.002	0.099131	0.079395	0.097178	0.086045	0.09484	0.08794	0.10438	0.08234	0.084051	0.084538	0.082687	0.10808	0.093822	0.11096	0.10339	0.072088	0.079991	0.099297		0.086457	0.079123	0.087773	0.11828	0.10061	0.082175	0.12052	0.10393	0.10966	0.11126	0.11891	0.093027	0.11614	0.12522	0.1709	0.11987	0.11271	0.13966		0.10523	0.081686	0.073856	0.055784	0.063955	0.073401	0.094802	0.11961	0.091811	0.097174	0.13092
80.003	0.099624	0.07878	0.097524	0.084777	0.095819	0.087557	0.10483	0.083379	0.083012	0.084098	0.0839	0.10918	0.092422	0.11052	0.10276	0.073395	0.079455	0.099065		0.08587	0.081637	0.088967	0.11816	0.10084	0.086825	0.11833	0.10434	0.10733	0.11053	0.11491	0.091964	0.11744	0.12606	0.16639	0.11949	0.1132	0.13968		0.10771	0.084652	0.07629	0.060194	0.064641	0.074551	0.096218	0.11695	0.092082	0.095748	0.13014
90.004	0.098324	0.078681	0.09796	0.086288	0.094862	0.088089	0.10401	0.085056	0.084195	0.084068	0.081981	0.10944	0.093823	0.11151	0.10268	0.07213	0.08006	0.098212		0.084488	0.081493	0.085529	0.11763	0.097892	0.082306	0.11953	0.1059	0.10837	0.11024	0.11459	0.09481	0.11724	0.12599	0.16861	0.12236	0.11156	0.13658		0.1102	0.082301	0.076135	0.057382	0.060522	0.071214	0.095554	0.11718	0.089707	0.095066	0.12998
117.76	0.095737	0.075823	0.090123	0.083279	0.089442	0.081525	0.099181	0.081955	0.081746	0.08145	0.07464	0.10925	0.091626	0.1073	0.099764	0.069626	0.076445	0.094834		0.086441	0.082528	0.08239	0.11177	0.095536	0.080597	0.11751	0.10672	0.10313	0.1106	0.11284	0.091061	0.11636	0.12706	0.16938	0.12271	0.10827	0.13346		0.10617	0.080885	0.079394	0.062241	0.059048	0.069996	0.093292	0.1142	0.091525	0.094305	0.12657
127.76	0.097985	0.076767	0.093356	0.079963	0.090354	0.081795	0.10206	0.082844	0.083367	0.082914	0.07535	0.11432	0.092107	0.10905	0.10116	0.069342	0.07746	0.095514		0.08547	0.084872	0.085026	0.11451	0.10108	0.087464	0.1239	0.1121	0.11042	0.11799	0.117	0.09341	0.15619	0.14706	0.1887	0.14985	0.13414	0.14349		0.10695	0.083733	0.08119	0.065968	0.062052	0.071556	0.09672	0.12075	0.09288	0.09559	0.12864
137.76	0.1008	0.10142	0.11125	0.086598	0.0966	0.089608	0.10207	0.080876	0.083185	0.083639	0.076705	0.13526	0.095696	0.1112	0.1052	0.071317	0.080213	0.096634		0.092923	0.092349	0.088016	0.12058	0.1026	0.090265	0.14318	0.13019	0.13321	0.14507	0.13256	0.10807	0.17201	0.16067	0.20417	0.16383	0.14411	0.15033		0.11255	0.091448	0.085039	0.072582	0.066661	0.077819	0.11176	0.13386	0.10159	0.10213	0.13409
147.76	0.1142	0.13451	0.13077	0.10522	0.11336	0.11184	0.10508	0.08575	0.082661	0.083533	0.077151	0.15635	0.10389	0.11765	0.11082	0.081332	0.086062	0.10167		0.11702	0.11653	0.11229	0.13546	0.10803	0.10622	0.15771	0.14529	0.14788	0.16162	0.14776	0.12073	0.18439	0.1672	0.21211	0.17184	0.15056	0.15497		0.12508	0.10362	0.10595	0.089906	0.079196	0.089841	0.12301	0.14624	0.11416	0.11036	0.14008
157.76	0.12862	0.15473	0.14197	0.11826	0.12887	0.13036	0.10676	0.087166	0.082775	0.083675	0.080686	0.16864	0.11987	0.12713	0.1182	0.092059	0.093783	0.11089		0.13108	0.13442	0.1317	0.14639	0.11757	0.11656	0.16439	0.15093	0.15461	0.17088	0.15545	0.1315	0.1903	0.16686	0.21137	0.17096	0.15282	0.15559		0.13381	0.11604	0.12501	0.10787	0.087981	0.10414	0.13694	0.157	0.12688	0.11954	0.14609
167.76	0.13577	0.16723	0.14746	0.12744	0.14233	0.14242	0.1089	0.090123	0.08137	0.08307	0.088048	0.17674	0.13212	0.13586	0.12143	0.10177	0.09853	0.11858		0.13827	0.14005	0.14177	0.14937	0.12373	0.12415	0.16901	0.16082	0.15954	0.17686	0.16122	0.13807	0.19551	0.16953	0.21276	0.17333	0.15608	0.15726		0.13987	0.12471	0.14177	0.12657	0.098826	0.11392	0.14519	0.16526	0.13614	0.12416	0.14963
177.76	0.13973	0.16976	0.15109	0.13208	0.15077	0.15047	0.11742	0.099221	0.081249	0.081791	0.096996	0.18456	0.14305	0.14257	0.1247	0.10957	0.1034	0.12553		0.14558	0.13776	0.14743	0.15148	0.12877	0.13058	0.17288	0.1654	0.16251	0.18015	0.16546	0.14043	0.20023	0.17086	0.21093	0.17391	0.15662	0.16065		0.1468	0.13389	0.15037	0.13997	0.10469	0.12139	0.1543	0.17648	0.14813	0.13053	0.1556
187.76	0.1415	0.17248	0.1506	0.13011	0.15447	0.15355	0.13	0.10988	0.083389	0.084365	0.11089	0.19171	0.14883	0.14668	0.1283	0.11585	0.10612	0.12911		0.14546	0.13665	0.15165	0.14952	0.13023	0.13448	0.17701	0.16711	0.16829	0.18268	0.16612	0.14354	0.20331	0.17253	0.2112	0.17408	0.15889	0.16285		0.14894	0.13788	0.15603	0.14905	0.10905	0.12682	0.15979	0.18383	0.15556	0.13571	0.15897
197.76	0.14104	0.1707	0.15085	0.13381	0.15628	0.15573	0.14062	0.11992	0.0861	0.086607	0.12427	0.19465	0.15114	0.14884	0.12933	0.11956	0.108	0.13103		0.1465	0.13948	0.1547	0.15038	0.13093	0.13747	0.18	0.1716	0.17226	0.18482	0.16808	0.14289	0.20756	0.17356	0.20978	0.17442	0.15768	0.16496		0.15426	0.14478	0.16246	0.15446	0.11371	0.1361	0.1637	0.18755	0.16268	0.14196	0.16222
207.76	0.14175	0.17032	0.15093	0.1345	0.15742	0.15394	0.15167	0.13572	0.095153	0.093249	0.13573	0.20019	0.1539	0.14948	0.13075	0.12272	0.10915	0.13208		0.1463	0.13951	0.15425	0.15141	0.13226	0.13941	0.17948	0.1756	0.17312	0.18469	0.17057	0.1427	0.21018	0.17549	0.20939	0.17338	0.15586	0.16702		0.15662	0.14625	0.16412	0.15286	0.1135	0.13581	0.16289	0.18915	0.16516	0.14558	0.16408
217.76	0.14307	0.16929	0.14913	0.13484	0.15791	0.15507	0.15952	0.1397	0.10149	0.10003	0.14083	0.20115	0.15585	0.15026	0.13173	0.12614	0.11074	0.133		0.1499	0.14492	0.15396	0.15232	0.13304	0.14012	0.1795	0.18078	0.17348	0.18401	0.16791	0.13808	0.21291	0.17663	0.20761	0.17386	0.15476	0.16774		0.16115	0.14966	0.16566	0.16045	0.11617	0.14315	0.16589	0.192	0.17107	0.1501	0.16612
227.76	0.14307	0.16619	0.14943	0.13394	0.15691	0.15493	0.1607	0.14486	0.10843	0.10634	0.1455	0.20325	0.15661	0.15186	0.13177	0.12706	0.11229	0.13368		0.14834	0.14502	0.15024	0.15313	0.13187	0.14032	0.17847	0.1722	0.17106	0.18201	0.168	0.13687	0.21183	0.17687	0.20847	0.17434	0.15522	0.16832		0.16463	0.14887	0.16515	0.16288	0.117	0.14383	0.16629	0.18734	0.17243	0.15041	0.16548
237.76	0.14518	0.16626	0.14955	0.13499	0.15813	0.15337	0.16392	0.14504	0.11266	0.1102	0.14785	0.20994	0.15809	0.15296	0.13287	0.12885	0.11344	0.13518		0.14596	0.15541	0.14759	0.15381	0.13309	0.14085	0.17955	0.17227	0.16761	0.18055	0.16759	0.13863	0.21262	0.17675	0.21134	0.17418	0.15508	0.16985		0.16054	0.14694	0.16407	0.16051	0.11757	0.14478	0.16707	0.18532	0.17486	0.15242	0.16781
247.77	0.14432	0.16628	0.14845	0.13378	0.15717	0.15481	0.1666	0.14902	0.11473	0.11295	0.15033	0.20838	0.15857	0.15354	0.13301	0.12962	0.1136	0.13447		0.14942	0.1533	0.14341	0.15414	0.134	0.14055	0.17649	0.16837	0.16613	0.17908	0.168	0.13959	0.21288	0.17801	0.21227	0.17275	0.15367	0.16692		0.16488	0.14952	0.16656	0.16283	0.119	0.14738	0.16975	0.18389	0.17481	0.15415	0.16958
257.77	0.14519	0.16433	0.14655	0.1341	0.1562	0.15231	0.1665	0.14773	0.1168	0.11487	0.15202	0.20488	0.15853	0.15397	0.13325	0.12998	0.11437	0.13413		0.14991	0.15257	0.14182	0.15433	0.13567	0.14078	0.1757	0.16833	0.16538	0.17777	0.16708	0.13776	0.21122	0.17887	0.21403	0.17404	0.15327	0.16781		0.16199	0.14758	0.16589	0.15872	0.11864	0.14608	0.1698	0.18419	0.17475	0.15634	0.17045
267.77	0.14456	0.16324	0.14582	0.13571	0.15643	0.15279	0.16728	0.15203	0.11767	0.11563	0.15285	0.20541	0.15825	0.15533	0.13307	0.13102	0.11565	0.13373		0.15014	0.1488	0.14094	0.15331	0.13435	0.13971	0.1768	0.16505	0.16337	0.17853	0.16505	0.13532	0.20846	0.18068	0.21717	0.17143	0.15611	0.16747		0.16158	0.14735	0.16644	0.1574	0.11746	0.14307	0.16875	0.18326	0.17421	0.15596	0.1714
277.77	0.14356	0.16341	0.14584	0.13305	0.15504	0.15123	0.16909	0.15052	0.11633	0.11585	0.15397	0.20722	0.15924	0.15553	0.13357	0.13058	0.11557	0.13416		0.14901	0.1498	0.14081	0.15401	0.13616	0.13837	0.17487	0.16689	0.16207	0.1759	0.16516	0.1347	0.20857	0.18133	0.21872	0.17307	0.15655	0.16832		0.1605	0.14664	0.16316	0.15834	0.11705	0.14178	0.1679	0.18355	0.17541	0.15679	0.1725
287.77	0.14333	0.15713	0.14463	0.13129	0.15421	0.15005	0.16696	0.14903	0.11576	0.11618	0.1553	0.20166	0.15838	0.15647	0.13357	0.1316	0.1152	0.13427		0.14965	0.15139	0.14029	0.15307	0.13586	0.13703	0.17376	0.16295	0.16032	0.16985	0.16317	0.13375	0.20697	0.18004	0.21791	0.17396	0.1552	0.16599		0.16344	0.14642	0.16574	0.15567	0.117	0.14157	0.16898	0.18106	0.17113	0.1557	0.16991
297.77	0.14195	0.16008	0.14368	0.12939	0.15363	0.1493	0.16804	0.14798	0.11604	0.11672	0.15422	0.20362	0.15738	0.1569	0.13312	0.13084	0.116	0.1351		0.14835	0.14789	0.13868	0.15175	0.13425	0.13724	0.17157	0.16145	0.16211	0.17077	0.16378	0.1335	0.20676	0.18051	0.22026	0.17584	0.15602	0.16713		0.15982	0.14353	0.16275	0.15465	0.11622	0.13806	0.16879	0.18156	0.17262	0.15791	0.17141
307.77	0.14331	0.15582	0.14304	0.13075	0.15311	0.15128	0.16692	0.15248	0.11803	0.11585	0.1549	0.2027	0.15833	0.15623	0.13362	0.13137	0.11628	0.13671		0.14879	0.14787	0.13866	0.15273	0.13399	0.13696	0.17084	0.15642	0.15935	0.16999	0.16162	0.1323	0.20661	0.17936	0.21752	0.17541	0.15443	0.16791		0.15992	0.14541	0.16313	0.15544	0.11538	0.14072	0.16873	0.18143	0.17417	0.15943	0.17143
317.77	0.14202	0.15726	0.1442	0.13172	0.15483	0.15037	0.16652	0.15251	0.11695	0.1161	0.15667	0.20204	0.15757	0.15589	0.13275	0.12984	0.11522	0.13754		0.14755	0.14811	0.13624	0.1512	0.1325	0.13734	0.16965	0.15999	0.15878	0.16684	0.15998	0.13181	0.20588	0.17918	0.21889	0.17374	0.15446	0.16966		0.16179	0.14305	0.16127	0.15291	0.11439	0.13941	0.16508	0.18109	0.17116	0.15847	0.17093
327.77	0.14032	0.1548	0.14223	0.12936	0.15218	0.15002	0.16847	0.15131	0.11675	0.1162	0.15522	0.20021	0.15898	0.15679	0.13277	0.13026	0.11609	0.13683		0.15017	0.14559	0.13566	0.15087	0.13282	0.13699	0.168	0.15827	0.15658	0.16737	0.16107	0.13163	0.20325	0.17644	0.22024	0.17363	0.15134	0.16972		0.16142	0.14099	0.15852	0.15229	0.11495	0.13789	0.16494	0.18078	0.17004	0.1568	0.1716
337.77	0.14077	0.15616	0.14109	0.13005	0.15132	0.14853	0.16751	0.15057	0.1162	0.11481	0.15735	0.19814	0.15915	0.15554	0.13268	0.1302	0.11589	0.13776		0.14868	0.14579	0.13569	0.15151	0.13288	0.1366	0.16598	0.15783	0.15686	0.16278	0.15763	0.12844	0.20356	0.17678	0.21884	0.17515	0.15385	0.16853		0.15886	0.14417	0.15759	0.14709	0.11478	0.14156	0.16742	0.18174	0.17158	0.15895	0.17399
347.77	0.14118	0.15335	0.14353	0.12967	0.15086	0.14945	0.16807	0.14814	0.11533	0.11425	0.15594	0.19665	0.15912	0.15589	0.13176	0.12904	0.11586	0.13775		0.14765	0.1465	0.13789	0.15172	0.13258	0.13275	0.16552	0.15474	0.15703	0.16212	0.15824	0.12858	0.20399	0.17704	0.21984	0.17463	0.15225	0.16805		0.15909	0.14234	0.15492	0.14829	0.11251	0.13689	0.16439	0.17909	0.16788	0.15794	0.17168
357.77	0.1397	0.15151	0.14049	0.12871	0.15044	0.14793	0.16614	0.14964	0.11498	0.11526	0.15506	0.19768	0.16004	0.15604	0.13092	0.12771	0.11491	0.13893		0.14819	0.14615	0.13395	0.15056	0.13212	0.13438	0.16445	0.15332	0.15662	0.16451	0.1565	0.12987	0.2052	0.17704	0.22011	0.17647	0.15323	0.16672		0.15692	0.14204	0.15383	0.14757	0.11282	0.1399	0.16238	0.17434	0.16508	0.15296	0.169
367.77	0.13965	0.15366	0.14063	0.13182	0.15051	0.14823	0.16873	0.15033	0.11524	0.11538	0.15439	0.19809	0.16065	0.15568	0.1312	0.12732	0.11475	0.13842		0.1476	0.15023	0.1342	0.15044	0.13103	0.1331	0.1637	0.15325	0.15594	0.16264	0.15545	0.13038	0.20311	0.17658	0.21915	0.1714	0.15055	0.16609		0.15847	0.14192	0.15346	0.14555	0.11238	0.13717	0.16379	0.17757	0.16426	0.15594	0.17119
377.77	0.13896	0.1531	0.13828	0.13045	0.14975	0.14693	0.16711	0.14645	0.11401	0.11314	0.15229	0.1991	0.16065	0.15554	0.13183	0.1269	0.11551	0.13901		0.14752	0.14874	0.13628	0.15076	0.13142	0.1352	0.16215	0.15124	0.15542	0.16162	0.1546	0.12965	0.20362	0.17451	0.21957	0.17167	0.15175	0.16694		0.15846	0.14186	0.15302	0.14868	0.11234	0.14077	0.16265	0.17762	0.1648	0.15792	0.1716
387.77	0.13899	0.15304	0.13891	0.13002	0.14997	0.14575	0.16605	0.14897	0.11517	0.11389	0.15082	0.19291	0.16179	0.15655	0.13124	0.12745	0.11497	0.13991		0.1481	0.14826	0.13342	0.15139	0.13056	0.1348	0.16176	0.15424	0.15582	0.16012	0.15506	0.12827	0.20399	0.17493	0.21919	0.17329	0.15102	0.16371		0.15416	0.13957	0.15114	0.14881	0.11203	0.1371	0.16464	0.17753	0.16297	0.15799	0.17132
397.78	0.13901	0.15165	0.13948	0.13168	0.14964	0.14684	0.16492	0.14836	0.11276	0.11271	0.15022	0.19223	0.16108	0.15523	0.13082	0.12502	0.11378	0.13994		0.14572	0.14289	0.13745	0.15066	0.12983	0.13461	0.16076	0.15568	0.15609	0.16104	0.15427	0.12822	0.20416	0.17419	0.21607	0.17099	0.15153	0.16591		0.15987	0.14096	0.15035	0.14959	0.11204	0.13845	0.16207	0.17773	0.16479	0.15734	0.17223
407.78	0.13908	0.15155	0.13881	0.13086	0.15031	0.14682	0.16547	0.14861	0.113	0.11287	0.14826	0.19564	0.16149	0.15437	0.131	0.12514	0.11391	0.13993		0.1467	0.14595	0.13481	0.15041	0.12935	0.13119	0.16228	0.15123	0.15512	0.16018	0.15266	0.1291	0.20352	0.17401	0.21681	0.16972	0.14949	0.16475		0.15745	0.14106	0.1485	0.14675	0.10957	0.13499	0.16115	0.17628	0.16329	0.157	0.17198
417.78	0.13777	0.15177	0.13781	0.13117	0.14979	0.14539	0.17002	0.1479	0.11359	0.1125	0.1482	0.19294	0.1622	0.15431	0.13043	0.1246	0.11281	0.14046		0.14626	0.14667	0.13686	0.15068	0.12998	0.13653	0.15975	0.15437	0.15442	0.16036	0.15201	0.128	0.20191	0.17261	0.21501	0.17155	0.14853	0.16165		0.15639	0.14171	0.14723	0.14737	0.10982	0.13825	0.16145	0.17531	0.16183	0.15703	0.17095
427.78	0.13786	0.15215	0.14056	0.12948	0.1489	0.14587	0.16701	0.14502	0.11206	0.11147	0.14567	0.19097	0.16384	0.15503	0.13082	0.12465	0.11375	0.13967		0.1452	0.14438	0.13696	0.15042	0.12891	0.13341	0.15908	0.15303	0.15313	0.15824	0.15223	0.1265	0.20226	0.17281	0.21213	0.17004	0.14867	0.16348		0.15351	0.14096	0.14736	0.14396	0.10792	0.1359	0.16221	0.17557	0.16173	0.15747	0.17131
437.78	0.13746	0.14936	0.13742	0.12769	0.14921	0.14603	0.16635	0.14524	0.10991	0.11073	0.14555	0.19363	0.16293	0.15424	0.12982	0.12346	0.11366	0.13878		0.14521	0.14602	0.13616	0.14995	0.12933	0.13206	0.16088	0.15235	0.15416	0.16134	0.15105	0.12602	0.20291	0.17193	0.21276	0.16722	0.14841	0.16156		0.1554	0.1413	0.14599	0.14069	0.11033	0.13915	0.1614	0.17452	0.16208	0.15761	0.17209
447.78	0.13694	0.14885	0.13849	0.12932	0.14784	0.14551	0.16487	0.14744	0.11136	0.11135	0.14611	0.19027	0.16307	0.15437	0.12895	0.12291	0.11289	0.13906		0.14532	0.14453	0.1387	0.14931	0.12942	0.13192	0.15867	0.15256	0.15352	0.1589	0.15125	0.12568	0.20073	0.17393	0.20992	0.16666	0.14843	0.16186		0.15364	0.13997	0.14802	0.13816	0.11067	0.13465	0.16208	0.17488	0.16095	0.15782	0.17218
457.78	0.13604	0.14851	0.13831	0.12749	0.14809	0.14394	0.16963	0.14425	0.11096	0.11032	0.14331	0.18843	0.16344	0.15295	0.1288	0.12263	0.11218	0.13816		0.14654	0.14297	0.13966	0.14968	0.13035	0.13623	0.15574	0.15154	0.15135	0.15942	0.14961	0.12492	0.20102	0.17049	0.21123	0.16502	0.14686	0.16207		0.15535	0.13936	0.14363	0.1398	0.10831	0.13398	0.16145	0.17466	0.16308	0.15816	0.1731
467.78	0.13645	0.14792	0.13689	0.12868	0.14659	0.14361	0.16939	0.14283	0.11084	0.11046	0.14368	0.1902	0.16428	0.15127	0.12736	0.12157	0.11139	0.13786																					0.15204	0.13985	0.14338	0.13527	0.10945	0.13773	0.16226	0.17786	0.16394	0.1589	0.1734
Statistical data for rest Eapp
	STIM1	DYRK2+STIM1	DYRK2+STIM1-10M
	0.099847	0.084202	0.10654
	0.079582	0.080299	0.082998
	0.097957	0.092215	0.078831
	0.087103	0.11816	0.057617
	0.095224	0.10088	0.064129
	0.088999	0.085215	0.074067
	0.07083	0.086223	0.027779
	0.076017	0.098588	0.036719
	0.072155	0.09396	0.083503
	0.059372	0.10147	0.08829
	0.080096	0.07828	0.092204
	0.082825	0.082616	0.085752
	0.089852	0.1066	0.11251
	0.088299	0.095889	0.097954
	0.083341	0.10626	0.062626
	0.083474	0.099974	0.063343
	0.10219	0.072853	0.073333
	0.085273	0.12135	0.059736
	0.084016	0.10674	0.059696
	0.085166	0.11029	0.10236
	0.084507	0.11106	0.10431
	0.10812	0.11938	0.094596
	0.121	0.094044	0.093652
	0.067783	0.12186	0.078331
	0.086257	0.11197	0.096994
	0.10948	0.11862	0.050343
	0.089387	0.12993	0.066139
	0.11011	0.13091	0.07205
	0.10675	0.11872	0.096124
	0.10606	0.103	0.11919
	0.10953	0.084472	0.092126
	0.094737	0.086131	0.098007
	0.10915	0.1016	0.13199
	0.099606	0.1169	0.097154
	0.097726	0.12467	0.10842
	0.093815	0.17031	0.067482
	0.094192	0.1216	0.085009
	0.11199	0.11272	0.10951
	0.10392	0.13952	0.10346
	0.0733	0.087934	0.060763
	0.080171	0.12565	0.026631
	0.099372	0.10549	0.085807
	0.099146	0.11729	0.12536
	0.10561	0.11214	0.067473
	0.033847	0.099771	0.086766
	0.085854	0.096913	0.0092823
	0.14195	0.11142	0.034951
	0.096193	0.1214	0.088974
	0.10172	0.13566	0.11709
	0.12366	0.14437	0.09419
	0.13161	0.12963	0.1017
	0.07107	0.15202	0.086937
	0.061319	0.080098	0.13473
	0.056884	0.12193	0.12634
	0.065701	0.11226	0.13215
		0.083619	0.12349
		0.090574	0.089729
		0.089951	0.078147
			0.13032
			0.15087
			0.062376
			0.10305
			0.054152
			0.10237
[truncated: 7 more columns]
