# Supplementary material for: Selective inhibition reveals the regulatory function of DYRK2 in protein synthesis and calcium entry
Source: eLife journal article supplement (doi:10.7554/elife.77696), 2022-04-19
Supplement: fig5-data6 [file Figure 5-source data 6-raw data of SOCE.xlsx]

## Sheet: STIM1
Time [s]	cell 1	cell 2	cell 3	cell 4	cell 5	cell 6	cell 7	cell 8	cell 9	cell 10	cell 11	cell 12	cell 13	cell 14	cell 15	cell 16	cell 17	cell 18	cell 19	cell 20	cell 21	cell 22	cell 23	cell 24	cell 25	cell 26	cell 27	cell 28	cell 29	cell 30	cell 31	cell 32	cell 33	cell 34	cell 35	cell 36	cell 37	cell 38	cell 39	cell 40	cell 41	cell 42	cell 43	cell 44	cell 45		Average	Std. Err.
0	1.147	1.036	1.059	1.093	1.097	1.08	1.098	1.079	1.079	1.124	1.046	1.0342	1.06414	1.141	0.796709	1.03957	0.662575	1.00949	0.93859	0.986289	1.09285	1.12997	1.13312	0.984271	1.12497	1.03265	1.00729	0.93873	1.01372	0.79008	0.944352	0.932462	1.01068	1.06978	1.04211	1.03906	1.08264	0.959257	1.09207	1.0427	1.01714	1.04753	1.04593	1.05607	1.01483		1.02789	0.0944336
10	1.131	1.037	1.055	1.057	1.102	1.064	1.126	1.074	1.036	1.099	1.084	1.05206	1.04836	0.982	0.830737	1.02634	0.77658	0.899069	0.972522	0.965916	1.12552	1.2121	1.12346	1.00138	1.08351	1.02125	0.964195	1.01894	1.05737	0.795241	0.935601	1.00073	0.987682	1.05578	1.06566	1.04631	1.05799	1.01287	1.04693	1.0694	0.982799	1.10838	1.0586	1.02811	1.05615		1.02966	0.0839465
20	1.074	1.05	1.052	1.025	1.086	1.095	1.128	1.058	1.096	1.106	1.079	1.03229	1.04104	0.968	0.91492	1.04652	0.948528	0.956955	1.00167	1.04216	1.11028	1.25305	1.07316	0.999126	0.99948	1.04552	0.996771	0.953147	0.992994	0.832913	0.95762	0.934916	1.02279	1.01692	1.07129	1.03242	1.03315	1.02202	1.03869	1.04776	1.02334	1.09012	0.990367	0.995879	1.02806		1.03029	0.066404
30	1.076	0.974	1.068	1.024	1.107	1.101	1.192	1.067	1.096	1.082	1.066	1.02561	1.0188	0.959	0.893468	1.04156	0.934311	0.933198	1.00645	0.991082	1.00356	1.15742	1.0431	1.01342	0.992293	1.02622	1.03499	1.00231	1.03577	0.861296	0.963078	0.991524	0.994826	1.02847	1.06617	1.06563	1.0242	1.02908	1.04357	1.02191	1.01637	1.04289	1.07986	1.02325	1.05737		1.02833	0.0602832
40	1.072	0.976	1.015	1.027	1.072	1.054	1.092	1.068	1.017	1.073	1.031	1.04565	1.02009	0.951	0.954719	1.0405	1.0011	0.948255	1.06371	1.04321	0.969587	1.01976	0.97936	0.993579	0.976262	1.0192	0.989589	0.978837	0.992333	0.91445	0.971358	1.0512	0.961895	0.985064	1.03647	1.09019	0.986043	1.08145	1.05303	1.0101	0.990804	1.01903	1.02542	0.990525	1.02365		1.01499	0.0421771
50	1.072	1.092	1.031	0.987	1.035	1.051	1.084	1.07	1.03	1.058	1.038	1.01934	1	1.012	0.978243	1.03514	1.01344	0.985061	1.04009	1.06973	0.957826	0.995321	0.909428	1.01934	1.04868	0.995802	1.02293	1.00989	1.02518	1.00218	0.973616	1.07854	0.933145	0.946558	1.01087	1.09744	0.971335	1.07869	1.03228	1.02415	0.976602	0.994529	1.07054	0.995978	1.04216		1.02031	0.042804
60	1.067	0.95	0.985	1.011	1.046	1.072	1.074	1.043	1.05	1.069	1.04	1.01934	1.01148	1.007	1.04334	1.03878	1.06307	1.02454	1.03964	0.988835	0.905993	0.974308	0.905199	1.02432	0.99561	1.02768	1.04705	1.04907	1.01416	1.05894	1.00025	1.05497	0.98141	0.96056	1.05696	1.08415	0.945695	1.09681	0.993238	1.00364	0.980475	0.991967	0.960164	0.975055	1.03874		1.0171	0.0446756
70	0.995	1.024	1.045	0.959	1.041	1.034	1.057	1.062	1.029	1.024	1.031	1.00066	0.992682	1.191	1.00295	1.02475	0.991448	1.02387	1.03157	1.03288	0.853724	0.868815	0.888131	0.998938	1.02214	0.990246	1.0078	1.03392	1.0534	1.09558	0.961572	1.0774	0.928353	0.938856	1.02828	1.0614	0.954043	1.04044	0.992933	0.983964	0.993645	0.968269	0.914673	0.97099	1.02122		1.00537	0.0592924
80	1.023	1.114	1.106	0.978	1.008	1.056	1.055	1.065	1.009	1.008	1.019	1.03679	0.995265	1.063	1.01863	0.996956	1.02981	1.04964	0.972522	1.02059	0.908606	0.875033	0.897797	0.994519	0.961889	1.01686	0.997028	1.08308	1.02254	1.11003	1.01267	1.0406	0.963985	0.974562	0.960171	1.03886	0.966564	1.05493	1.01337	0.990991	0.983316	0.970671	1.00267	0.982492	0.967231		1.00921	0.0504731
90	0.978	0.927	0.975	0.99	0.987	1.017	1	0.919	0.895	0.949	0.986	0.994933	0.990099	0.923	1.06805	0.990008	1.07675	1.06603	0.992403	1.0146	0.957391	0.88554	0.913808	0.988032	1.01938	0.993755	0.998823	1.05776	1.01592	1.07907	1.02311	1.01343	1.01957	0.998016	1.00677	1.04289	0.969744	1.04435	0.995678	0.996612	0.982799	0.985402	1.02467	1.01422	0.972851		0.994188	0.0446875
100	0.906	1.016	1.051	0.952	0.972	1.024	0.997	1.006	1.014	0.972	0.984	0.983345	0.970154	0.917	1.09024	0.982861	1.09365	1.07808	1.03829	0.990783	1.01053	0.895188	0.937975	1.01332	0.99948	1.0075	0.976251	1.06275	1.01085	1.07752	1.02255	1.04778	1.00563	1.02567	0.995505	1.06624	0.9608	1.05703	1.00025	1.00729	0.980992	0.990686	0.992977	1.03118	0.939243		1.00341	0.0459065
110	0.96	0.86	0.89	1.003	0.97	0.97	0.946	0.956	0.964	0.956	0.989	1.00734	0.977328	0.91	1.04719	0.994971	0.969719	1.09749	1.0374	1.00397	1.03623	0.943432	0.98948	0.968006	0.930931	1.03236	0.952909	1.02948	0.967199	1.04759	1.03516	1.04103	0.988989	1.01167	0.949929	1.01934	0.951657	1.03996	0.987442	1.01376	1.0112	0.947453	1.04294	1.00649	0.963154		0.987048	0.045945
120	0.93	0.969	0.945	0.95	0.955	0.929	0.917	0.951	0.969	0.941	0.978	0.975029	1.00172	1.01	1.04793	0.988618	0.935384	1.00447	1.02903	1.04216	0.969587	0.985243	1.03147	0.994613	0.956913	0.99668	0.951883	0.984382	0.964994	1.06307	1.03638	0.969792	1.04318	1.01517	0.911522	0.945461	1.00115	0.948287	0.968834	0.912577	1.02592	0.914467	1.00155	0.977039	0.904424		0.97651	0.0409193
130	0.928	0.987	0.949	0.999	0.925	0.92	0.85	0.909	0.902	0.924	0.941	0.960851	0.97862	0.951	1.0642	0.978626	1.06361	0.987069	0.962656	0.96292	0.990059	0.906981	1.02316	1.00599	0.978473	0.981765	1.00549	0.96017	1.00115	1.06101	1.03243	0.972421	1.02227	1.01027	0.943784	0.935598	1.00194	0.963264	0.952667	0.987618	1.03315	0.997571	0.937791	1.00034	0.983098		0.974045	0.0450877
140	0.917	1.02	0.955	0.948	0.887	0.903	0.876	0.905	0.959	0.929	0.94	0.961532	0.985364	0.868	1.10237	0.967377	1.13308	0.955951	0.940981	0.949288	1.03318	0.97538	1.03585	0.997152	0.927614	0.964802	0.983176	0.925238	0.960805	1.06411	1.03798	0.973648	1.03865	0.994866	0.96734	0.954721	0.987633	0.989019	0.97646	0.989304	1.01404	0.96955	1.02616	0.993995	1.01098		0.975436	0.0541069
150	0.893	0.955	0.942	0.979	0.906	0.874	0.844	0.928	0.947	0.892	0.912	0.948581	0.971732	0.896	1.06923	0.901138	1.14837	0.984727	0.964749	0.953183	1.07108	1.01419	1.0644	1.00477	0.988976	0.90251	1.0296	0.9391	0.953309	1.07339	1.03196	0.934741	1.05145	1.00852	0.940711	0.857699	1.03454	0.896394	0.937414	0.961761	0.983058	1.0091	0.910198	0.975849	0.99577		0.966227	0.065055
160	0.923	1.005	0.921	1.024	0.923	0.878	0.842	0.911	0.961	0.901	0.921	0.956897	0.977041	1	1.07707	0.9063	1.15857	0.996103	0.967739	0.942397	1.004	0.908268	1.05111	0.99922	0.993399	0.945208	1.03422	0.986046	0.949341	1.02282	1.04513	0.97137	1.02741	0.974562	0.973485	0.820661	1.02639	0.861386	0.927348	0.955578	1.00475	1.02063	0.928469	0.976344	1.02111		0.969341	0.0635594
170	0.908	1.007	0.953	0.994	0.88	0.88	0.82	0.928	0.948	0.891	0.916	0.945582	0.956091	1.252	1.0426	0.844693	1.11135	0.991084	0.971775	0.949887	1.03623	0.948363	1.03313	0.986904	1.00003	0.920934	1.01344	0.987155	0.968963	1.05069	1.01521	0.913447	1.01809	0.984714	0.972973	0.801941	1.04448	0.824755	0.947786	0.980873	0.999584	0.931761	0.987011	1.00619	0.959959		0.967215	0.0778107
180	0.872	0.94	0.89	1.033	0.811	0.771	0.77	0.852	1.003	0.84	0.886	0.914635	1.00904	1.223	0.95605	0.947194	0.817622	1.22129	1.00675	1.0167	1.67042	1.03499	1.08056	0.985776	1.24493	1.08208	1.0296	0.941872	1.01129	1.3918	1.07919	0.970406	1.04936	1.12684	1.18651	0.80959	1.05879	0.89172	0.996289	1.04833	1.10804	1.10918	0.996333	1.04437	1.12744		1.01902	0.165206
190	0.849	1.016	0.975	0.974	0.828	0.814	0.838	0.94	0.926	0.888	0.863	0.89623	0.946477	1.171	1.07116	1.00377	1.00164	2.11601	1.42336	1.17773	4.3627	1.28393	1.18115	1.08205	3.34726	2.09016	1.22634	1.23334	1.30386	2.81405	1.13998	1.00809	1.04144	1.96523	2.0965	0.951299	1.36031	1.07487	1.16468	1.1644	1.30532	1.1657	1.62575	1.27938	1.26441		1.3389	0.69271
200	0.951	1.064	0.994	1.091	0.907	0.863	0.969	0.972	1.096	0.907	0.886	0.883143	0.955948	1.241	1.22266	1.07683	1.24414	3.94225	2.17315	1.75896	5.45599	1.59676	1.35923	1.28861	5.46563	3.16054	1.48951	1.75677	2.00098	4.21256	1.25515	1.09738	1.08892	3.36966	3.48734	1.02074	1.72682	1.32861	1.69302	1.49379	1.70118	1.47026	2.06202	1.55406	1.68511		1.75597	1.14997
210	1.457	1.271	1.008	1.97	1.044	0.938	1.139	1.223	1.304	0.972	0.943	0.847288	0.956952	1.358	1.40552	1.17264	1.72028	5.19901	2.92937	2.42483	5.74478	1.95591	1.63111	1.59708	6.21911	4.09551	1.76731	2.38629	2.93687	4.58721	1.5206	1.29437	1.18876	4.63617	4.62265	1.26129	1.77949	1.7947	2.5441	2.10143	2.3643	1.71268	2.11721	1.79899	1.91452		2.15234	1.37145
220	2.641	1.842	1.237	5.84	1.648	1.396	1.563	1.528	1.679	6.207	2.039	0.893913	0.954369	1.862	1.54533	1.20408	1.92173	6.46413	3.37483	2.81656	5.56532	2.27646	1.87867	1.87509	6.3446	4.51986	1.92275	2.66962	3.58064	4.35912	1.87092	1.56611	1.37816	5.22672	5.27454	1.29188	2.02694	2.09871	3.39733	2.60058	3.08164	1.82141	2.07768	2.16152	2.19792		2.70491	1.5823
230	3.52	2.384	1.447	7.808	2.883	2.428	1.994	1.855	1.925	8.159	2.89	0.897185	0.974745	2.719	2.26392	1.30843	3.08513	6.73382	3.68022	3.13893	5.18507	2.52926	2.10991	2.25868	6.20142	4.86174	2.14154	2.80177	3.94331	4.27603	2.17843	1.86054	1.61138	5.62334	5.41587	1.32228	2.28771	2.32069	3.82043	2.96173	3.60558	1.87233	2.11087	2.49332	2.38105		3.11708	1.71848
240	4.132	2.869	1.641	8.116	5.346	4.167	2.323	2.117	2.141	7.065	3.203	0.941901	0.961257	3.534	3.29321	1.39267	4.75095	6.56417	3.66318	3.32333	4.59051	2.75632	2.21685	2.41579	6.17157	4.58625	2.13975	2.78255	3.83264	4.01542	2.59114	2.5494	1.85723	5.83582	5.30168	1.36777	2.12294	2.19133	4.07057	3.10647	4.25475	1.99626	1.96768	2.5192	2.67239		3.36571	1.64624
250	4.208	3.164	1.961	7.49	6.956	5.686	2.605	2.321	2.381	6.415	3.834	1.06473	1.03272	3.968	4.30859	1.43178	6.36876	6.39286	3.61773	3.31989	4.47334	3.12212	2.02155	2.69539	5.63313	4.38826	2.06434	2.49164	3.45167	3.61497	2.90457	2.8306	2.05151	5.7035	5.21616	1.4187	2.28672	2.62174	4.06325	3.05954	4.56565	1.91844	1.95277	2.47547	2.63691		3.51529	1.64765
260	4.207	3.357	1.989	7.039	7.14	6.069	2.742	2.331	2.384	5.733	3.869	1.26514	1.10418	3.828	5.33181	1.43019	7.1601	5.89263	3.41982	3.28933	4.04343	3.33353	2.0205	2.83952	5.07479	4.26894	2.0864	2.14564	2.8392	3.38532	3.16465	2.62993	2.47482	5.27538	4.83824	1.35247	2.30282	2.66486	3.8732	2.98365	4.7242	1.75672	1.79952	2.46615	2.65179		3.47949	1.61423
270	4.057	3.256	1.937	5.977	6.811	6.18	2.781	2.376	2.434	5.15	3.768	1.56138	1.20247	3.713	5.67875	1.46751	6.68476	5.67581	2.97183	3.05369	3.64706	3.18687	2.03016	2.8116	4.41418	4.13382	1.93891	2.0706	2.83303	3.27437	3.36273	2.61617	2.6177	5.07725	4.5064	1.50263	2.29288	2.74375	3.5831	2.70035	4.45617	1.76857	1.57653	2.41518	2.57113		3.35261	1.47328
280	3.963	2.975	1.815	4.975	5.949	6.076	2.52	2.363	2.317	4.812	3.522	1.76942	1.36777	3.654	4.93678	1.48908	5.16808	5.8759	2.81413	2.91557	2.99065	3.11826	2.01295	2.75246	3.59603	3.77323	1.89838	1.75474	2.39474	2.82798	3.49183	2.95047	2.58024	4.86896	4.08853	1.61375	2.33065	2.76034	3.33601	2.52722	4.71362	1.58346	1.53999	2.39346	2.65002		3.15168	1.28149
290	3.838	2.812	1.766	4.569	5.125	5.663	2.39	2.316	2.194	4.643	3.139	1.98046	1.50323	3.1	3.96653	1.50503	3.58702	5.3914	2.35552	2.74855	2.66179	2.85881	1.94316	2.56198	2.91386	3.39304	1.69266	1.58969	2.09534	2.43784	3.48157	2.9113	2.57527	4.64597	3.92313	1.62401	2.31097	2.82521	3.03432	2.35691	4.46882	1.55352	1.38003	2.30808	2.50744		2.90328	1.10726
300	3.567	2.306	1.58	3.839	4.282	5.307	2.162	2.178	2.099	4.073	3.048	2.20349	1.64313	3.025	3.41394	1.49484	3.02585	5.52223	2.18541	2.50707	2.24277	2.59165	1.84227	2.38297	2.34723	3.0845	1.51414	1.48397	1.93043	1.97185	3.48675	2.77434	2.58712	4.15519	3.47966	1.62643	2.39445	2.84677	2.78021	2.20289	4.36114	1.32743	1.34311	2.19742	2.29753		2.68254	1.00677
310	3.314	2.216	1.512	3.269	3.492	4.877	1.954	2.213	2.096	3.693	2.878	2.41331	1.75133	2.504	2.90543	1.4245	2.77101	5.41984	1.80304	2.3339	1.84422	2.46021	1.76221	2.15601	1.87513	2.77713	1.41051	1.45292	1.82637	1.69163	3.33986	2.83051	2.37054	3.83874	3.29787	1.63307	2.36523	2.77685	2.60633	1.97018	3.97071	1.30565	1.29464	2.13743	2.16531		2.48888	0.913126
320	3.126	2.031	1.423	2.808	3.016	4.484	1.827	2.068	1.85	3.145	2.492	2.4298	1.82881	2.196	2.39767	1.32769	2.56285	4.75533	1.67404	2.19144	1.77714	2.21278	1.74092	2.07036	1.58712	2.47064	1.37537	1.33758	1.66609	1.49966	3.22168	2.70126	2.33543	3.54084	3.03926	1.65582	2.30024	2.69548	2.33484	1.81166	3.7538	1.27282	1.20552	2.03618	2.13137		2.29794	0.803144
330	2.851	1.969	1.362	2.491	2.558	4.107	1.712	2.002	1.855	2.748	2.201	2.58713	1.86124	1.987	2.0781	1.31994	2.22673	4.3769	1.56387	1.99145	1.62469	2.04703	1.67733	1.91119	1.26593	2.17	1.3115	1.25423	1.57922	1.37529	3.13821	2.65639	2.27262	3.28495	2.86566	1.67474	2.14103	2.5377	2.13351	1.67901	3.46123	1.21262	1.1466	1.8926	1.96179		2.13608	0.728828
340	2.642	1.959	1.348	2.329	2.227	3.824	1.552	1.819	1.659	2.027	1.911	2.34228	1.86856	1.935	1.72938	1.28567	2.10307	3.76257	1.40108	1.71432	1.3359	1.7402	1.56812	1.71018	1.11889	1.89276	1.1853	1.21615	1.50559	1.13481	3.03612	2.67471	2.07651	2.96709	2.53639	1.66648	1.92041	2.32965	1.93736	1.71948	3.33832	1.10646	1.14698	1.73701	1.89656		1.95414	0.660075
350	2.398	1.73	1.301	2.173	1.919	3.442	1.399	1.757	1.612	1.491	1.663	2.20758	1.76439	1.762	1.51278	1.18945	1.94319	3.13821	1.27686	1.57366	1.1865	1.44023	1.6154	1.66167	0.997268	1.71728	1.18504	1.13557	1.42555	1.11468	2.9949	2.40595	2.20127	2.74866	2.43755	1.64797	1.97527	2.29579	1.83883	1.60087	3.03619	1.08564	1.1343	1.5728	1.75904		1.81039	0.58981
360	2.175	1.663	1.21	2.057	1.696	3	1.375	1.583	1.502	1.253	1.455	2.0534	1.69537	1.958	1.42357	1.25774	1.69936	2.95686	1.17836	1.46191	1.173	1.37634	1.54305	1.50917	0.924298	1.49034	1.12323	1.16015	1.43371	1.0992	2.86665	2.46413	1.98608	2.50187	2.37713	1.72003	1.83395	2.1921	1.71498	1.51319	2.71109	1.02767	1.04667	1.56507	1.67288		1.70399	0.534351
370	1.978	1.735	1.273	1.867	1.458	2.645	1.286	1.559	1.381	0.984	1.299	1.79232	1.59191	1.712	1.30077	1.16212	1.55182	2.49611	1.06595	1.25323	1.03536	1.33024	1.3973	1.4254	0.885601	1.34938	1.17119	1.05	1.27674	1.15854	2.86449	2.36625	1.95289	2.32089	2.14925	1.68098	1.66262	2.03403	1.60608	1.44096	2.45932	0.967308	1.05077	1.49694	1.62076		1.58099	0.482062
380	1.915	1.461	1.329	1.681	1.336	2.315	1.209	1.571	1.389	0.877	1.202	1.75865	1.50022	1.797	1.21304	1.10641	1.45552	2.39674	1.02723	1.1999	1.18128	1.32466	1.27616	1.37031	0.874545	1.16776	1.17196	0.932816	1.19009	1.05017	2.70631	2.26933	1.78788	2.121	2.04119	1.60368	1.59365	1.88932	1.45264	1.34484	2.14171	0.91799	1.04667	1.41117	1.47233		1.49065	0.437271
390	1.8	1.31	1.26	1.492	1.225	2.151	1.137	1.452	1.295	0.774	1.102	1.4984	1.38069	1.457	1.14099	1.06008	1.37585	2.15248	0.965945	1.14852	0.939532	1.00283	1.3544	1.26031	0.804338	1.11161	1.0868	0.990481	1.17554	1.04192	2.55613	2.23849	1.62497	1.88541	1.85223	1.55879	1.5531	1.81521	1.32818	1.26614	1.98213	0.850738	1.04108	1.38301	1.44523		1.38503	0.403922
400	1.591	1.232	1.261	1.395	1.134	1.98	1.066	1.444	1.237	0.765	1.042	1.4346	1.31798	1.296	1.0676	1.00165	1.40831	2.09961	0.898977	1.06718	0.943888	1.10832	1.23991	1.20239	0.792176	1.07798	1.0414	0.911006	1.09309	1.00115	2.38017	2.18652	1.46606	1.73069	1.74265	1.51894	1.47002	1.66525	1.27144	1.22398	1.71951	0.859385	0.982537	1.34433	1.40137		1.31362	0.367337
410	1.53	0.988	1.328	1.216	1.079	1.795	1.012	1.387	1.25	0.705	0.967	1.29704	1.25111	1.235	1.10755	1.0976	1.44667	2.08221	0.888663	1.03887	1.10941	1.04163	1.23039	1.15426	0.839165	1.02329	1.0255	0.867203	1.03819	0.93406	2.35778	2.07611	1.48514	1.59312	1.62282	1.48834	1.5209	1.58207	1.22416	1.1006	1.69885	0.859064	0.890063	1.30477	1.38793		1.27015	0.353318
420	1.459	1.093	1.27	1.234	1.012	1.645	0.965	1.351	1.213	0.656	0.925	1.1907	1.18295	1.114	1.08225	1.08252	1.36726	2.12671	0.871323	0.990783	0.938661	1.07851	1.23462	1.08675	0.804338	0.961878	1.02653	0.877368	1.05561	0.926319	2.25286	1.97499	1.4245	1.5007	1.50708	1.33919	1.27166	1.38814	1.14607	1.11915	1.4742	0.816151	0.966503	1.28097	1.3184		1.21339	0.326313
430	1.378	1.169	1.156	1.142	0.954	1.49	0.935	1.263	1.124	0.685	0.945	1.11409	1.12398	1.179	0.939332	1.09198	1.05234	1.82323	0.81482	0.996475	0.874632	0.990604	1.23039	1.01502	0.809866	0.899293	0.968556	0.840403	0.979104	0.926835	2.16987	1.90296	1.39854	1.40373	1.36677	1.25666	1.22098	1.32279	1.10184	1.08289	1.41791	0.823357	0.903859	1.28256	1.28634		1.15227	0.293651
440	1.242	1.157	1.102	1.124	0.904	1.373	0.895	1.227	1.112	0.658	0.89	1.04442	1.09341	1.425	1.02174	1.10191	1.16179	1.72921	0.8205	0.963968	0.936919	0.90934	1.1804	0.949579	0.791623	0.860982	0.919051	0.818593	0.956617	0.898968	2.08612	1.85038	1.28232	1.31377	1.27972	1.21338	1.18142	1.30934	1.00086	0.996331	1.39312	0.796136	0.882978	1.27998	1.22617		1.11911	0.280055
450	1.198	1.163	1.08	0.984	0.844	1.229	0.805	1.2	1.02	0.636	0.866	0.964532	1.08509	1.401	1.04157	1.08053	1.29752	1.69006	0.778047	0.898955	0.916011	0.991247	1.1736	0.881698	0.871781	0.849868	0.863133	0.773866	0.921782	0.86594	2.04171	1.80928	1.22918	1.24096	1.22441	1.26612	1.11106	1.21586	1.00941	1.01207	1.22295	0.847535	0.881114	1.27353	1.21615		1.08828	0.271901
460	1.174	1.093	1.148	0.937	0.827	1.188	0.818	1.143	1.014	0.62	0.866	0.918589	1.04161	1.154	1.00369	1.07253	1.20015	1.5947	0.745311	0.859707	0.923851	0.995321	1.09627	0.858476	0.828109	0.857472	0.860568	0.740043	0.918475	0.875745	1.98882	1.71122	1.21855	1.22835	1.16706	1.25968	1.12975	1.23131	0.987747	0.993801	1.20203	0.862267	0.885961	1.23079	1.16678		1.05859	0.252473
470	1.091	1.096	1.026	0.885	0.811	1.136	0.821	1.072	0.969	0.674	0.837	0.88846	1.00847	1.007	1.00177	1.05883	1.12477	1.54652	0.764594	0.882627	1.07064	0.944933	1.08373	0.847006	0.831978	0.833491	0.849025	0.685889	0.858287	0.853555	1.94018	1.61492	1.22029	1.14784	1.1476	1.2631	1.16711	1.22254	0.946566	0.964853	1.21313	0.769075	0.894537	1.19906	1.12271		1.03096	0.240261
480	0.995	1.025	1.048	0.911	0.793	1.108	0.815	1.094	1.009	0.668	0.834	0.886278	0.999857	1.041	0.971733	1.02918	1.09419	1.4709	0.756223	0.84248	1.06933	0.967661	1.02649	0.849732	0.778909	0.815359	0.870572	0.735607	0.855862	0.897936	1.9016	1.54411	1.18754	1.12509	1.14811	1.19426	1.08622	1.14365	0.903249	0.969069	1.16511	0.749219	0.937418	1.15424	1.08568		1.01231	0.222771
490	0.978	1.056	0.978	0.855	0.784	1.054	0.804	1.011	0.958	0.692	0.84	0.826975	0.984216	1.206	0.975432	1.02614	1.10438	1.35981	0.753981	0.882027	1.01097	0.909983	1.03419	0.817484	0.822028	0.774123	0.812089	0.716015	0.861815	0.892259	1.87393	1.4613	1.16715	1.07958	1.1056	1.1858	1.09238	1.13287	0.909655	0.945179	1.08686	0.754183	0.81325	1.13679	1.06519		0.990881	0.213848
500	0.933	1.07	0.964	0.843	0.754	0.992	0.789	0.964	0.989	0.657	0.789	0.803526	0.97575	1.226	0.979278	0.979222	1.11055	1.40699	0.721992	0.870942	0.867227	0.994034	1.06394	0.803945	0.7181	0.810387	0.792851	0.701968	0.842854	0.855619	1.84184	1.42546	1.1303	1.07433	1.08666	1.17735	1.06853	1.10845	0.877625	0.936185	1.04942	0.794214	0.858741	1.12459	1.05252		0.975009	0.216451
510	0.946	1.019	0.966	0.844	0.766	0.95	0.775	0.93	0.967	0.629	0.789	0.75772	0.959822	1.204	0.948949	0.923968	1.0561	1.41837	0.729018	0.858658	0.825412	0.848445	1.08192	0.814569	0.725286	0.772076	0.814141	0.696239	0.846161	0.894323	1.78426	1.36088	1.17403	0.981914	1.07539	1.13206	1.01924	1.06295	0.855661	0.83585	0.944066	0.784126	0.746877	1.00639	1.00492		0.944995	0.208848
520	0.891	1.028	0.952	0.874	0.731	0.933	0.763	0.884	0.96	0.626	0.772	0.756493	0.948917	1.202	0.923205	0.904248	1.02954	1.40733	0.733054	0.850719	0.822363	0.879965	1.0576	0.783356	0.766194	0.788453	0.771818	0.677941	0.823233	0.903096	1.69364	1.37841	1.08717	1.01622	1.03442	1.13125	1.01625	0.99274	0.88159	0.858053	1.0094	0.734328	0.869554	1.0879	0.990371		0.938329	0.199454
530	0.842	1.058	0.969	0.815	0.745	0.917	0.756	0.89	0.926	0.662	0.777	0.747904	0.926388	1.108	0.926312	0.925622	1.00271	1.35145	0.733652	0.838735	0.886392	0.997679	1.02875	0.785612	0.7181	0.780557	0.736677	0.659828	0.779139	0.892259	1.65638	1.31269	1.08282	1.00467	1.01343	1.14051	1.05183	1.05408	0.869388	0.864236	0.937869	0.719436	0.853893	1.06599	0.986735		0.928816	0.190591
540	0.836	1.057	0.864	0.873	0.73	0.87	0.745	0.852	0.922	0.634	0.751	0.731135	0.923805	1.073	0.923797	0.903851	0.997886	1.34609	0.757718	0.799487	0.911655	0.849732	1.01939	0.748475	0.715336	0.767982	0.749759	0.644488	0.753564	0.852007	1.61554	1.2538	1.06147	0.996266	1.03698	1.1691	1.05422	1.05799	0.841324	0.892622	0.890097	0.779323	0.797216	1.03297	0.996872		0.912865	0.187244
550	0.844	1.033	0.864	0.881	0.742	0.819	0.736	0.86	0.874	0.67	0.779	0.721592	0.914622	1.124	0.931047	0.892337	1.07809	1.26847	0.723636	0.777317	0.989188	0.877606	0.96622	0.747535	0.773933	0.74634	0.73129	0.680344	0.792587	0.82414	1.58129	1.28666	1.02497	0.964411	0.988336	1.09925	1.04289	1.00838	0.78611	0.847654	0.905849	0.759147	0.81586	1.02275	0.962714		0.905746	0.177769
560	0.824	0.979	0.858	0.839	0.724	0.818	0.736	0.841	0.865	0.691	0.735	0.728954	0.900416	1.088	0.918323	0.901734	1.11135	1.17946	0.706446	0.747656	0.822798	0.911055	0.979512	0.770099	0.752374	0.743123	0.766944	0.680713	0.781343	0.833429	1.54017	1.21708	1.04771	0.925554	0.989872	1.0133	1.04309	0.957731	0.800142	0.829948	0.881318	0.765232	0.773352	0.997664	0.958086		0.888311	0.165132
570	0.852	0.975	0.847	0.874	0.735	0.785	0.726	0.803	0.805	0.621	0.736	0.689146	0.884201	1.136	0.90841	0.856935	1.01559	1.14433	0.690153	0.750352	0.85024	0.942574	0.933746	0.752988	0.702621	0.701302	0.770022	0.665743	0.763265	0.823624	1.52747	1.1815	1.00049	0.912252	0.98936	0.999005	1.03116	0.931689	0.809904	0.841471	0.835354	0.780924	0.74464	0.998061	0.924478		0.872178	0.164975
580	0.779	1.017	0.897	0.88	0.689	0.821	0.712	0.806	0.834	0.648	0.721	0.711095	0.909313	1.073	0.87956	0.890749	0.939139	1.05901	0.683127	0.737769	0.808425	0.862597	0.960782	0.771697	0.704832	0.71651	0.80465	0.688846	0.768336	0.883486	1.48691	1.11552	0.991603	0.938856	0.962219	0.971629	1.05362	0.871402	0.793736	0.82264	0.83303	0.74938	0.793487	0.987351	0.916435		0.865439	0.151291
590	0.774	0.994	0.85	0.836	0.679	0.8	0.692	0.776	0.822	0.63	0.715	0.717093	0.929402	1.112	0.87024	0.893925	0.917679	1.11154	0.649942	0.724437	0.752671	0.809851	0.956251	0.752142	0.719205	0.665623	0.745142	0.71121	0.763485	0.859232	1.45718	1.1213	0.98925	0.930455	0.950441	0.994979	0.990018	0.938271	0.773603	0.859739	0.795071	0.781084	0.746504	0.950959	0.920622		0.853968	0.155682
600	0.772	0.954	0.851	0.828	0.683	0.798	0.705	0.775	0.779	0.579	0.704	0.708914	0.915052	0.999	0.873051	0.84906	0.951747	1.11388	0.638283	0.693428	0.753107	0.790339	0.955647	0.739073	0.700963	0.688727	0.756941	0.707698	0.749816	0.856651	1.45708	1.06356	0.988031	0.915403	0.94532	0.97022	0.984453	0.900305	0.772078	0.860582	0.787324	0.76315	0.749487	0.956215	0.90222		0.841885	0.151858
610	0.745	0.98	0.809	0.809	0.684	0.774	0.721	0.747	0.769	0.656	0.74	0.716548	0.918209	0.965	0.857516	0.872155	0.859469	1.07841	0.669524	0.717846	0.741782	0.70543	0.9851	0.731646	0.687142	0.727623	0.727699	0.739673	0.77495	0.834461	1.41493	1.08073	0.947171	0.914352	0.967852	0.996791	0.915086	0.947429	0.794651	0.837255	0.769507	0.774519	0.708098	0.921806	0.894287		0.836192	0.142644
620	0.766	0.953	0.788	0.752	0.729	0.791	0.726	0.721	0.746	0.566	0.682	0.669514	0.934998	1.023	0.876157	0.841186	0.931092	1.01116	0.676699	0.725635	0.718261	0.686347	0.969241	0.720364	0.702621	0.733472	0.67999	0.739858	0.76084	0.869553	1.40477	0.979607	0.963288	0.908751	0.972461	0.947273	0.910117	0.905647	0.773908	0.852713	0.795071	0.713992	0.833758	0.928846	0.888447		0.828192	0.142638
630	0.787	0.919	0.763	0.824	0.698	0.731	0.716	0.716	0.736	0.564	0.669	0.661062	0.936576	0.948	0.881484	0.848531	0.997081	1.0831	0.681184	0.710206	0.748315	0.723226	0.984798	0.746407	0.716994	0.750142	0.689737	0.701968	0.770761	0.87781	1.38774	1.05392	0.88218	0.89825	0.967852	0.996388	0.924626	0.919384	0.793431	0.816176	0.772089	0.702783	0.79125	0.898701	0.883819		0.828199	0.145431
640	0.738	0.906	0.769	0.76	0.708	0.72	0.703	0.711	0.75	0.558	0.682	0.635705	0.939446	0.911	0.796117	0.855479	0.889245	1.04429	0.677596	0.708109	0.745266	0.755389	0.992954	0.738039	0.707596	0.741368	0.646644	0.728583	0.757092	0.861296	1.34671	1.01256	0.896467	0.906301	0.957098	0.886483	0.84075	0.891529	0.755605	0.832477	0.722768	0.756105	0.704369	0.900288	0.868723		0.80921	0.135503
650	0.739	0.914	0.799	0.745	0.715	0.735	0.737	0.725	0.782	0.524	0.661	0.624253	0.93055	0.905	0.826003	0.847472	0.904803	0.966324	0.676849	0.690882	0.798842	0.76954	0.968183	0.723842	0.726392	0.736982	0.69538	0.698272	0.766572	0.846846	1.36854	1.02	0.864233	0.871295	0.952489	0.864341	0.84552	0.867204	0.745234	0.811679	0.707275	0.686771	0.814368	0.894338	0.861891		0.80787	0.133379
660	0.763	0.872	0.816	0.738	0.724	0.722	0.725	0.714	0.819	0.56	0.662	0.654246	0.944899	0.946	0.859439	0.859582	0.983132	0.955616	0.677148	0.702716	0.815394	0.762679	0.934048	0.726945	0.751821	0.696331	0.706666	0.707144	0.752462	0.881938	1.33871	1.00327	0.857699	0.910852	0.968364	0.864945	0.834191	0.840304	0.730896	0.796502	0.714505	0.743615	0.691318	0.874902	0.858696		0.810266	0.130009
670	0.753	0.81	0.865	0.734	0.706	0.71	0.72	0.721	0.806	0.572	0.697	0.665425	0.949634	0.941	0.844052	0.867721	0.906144	0.950597	0.688658	0.732227	0.802762	0.796986	0.942959	0.758159	0.71423	0.739029	0.740268	0.699566	0.745407	0.845298	1.32638	0.988545	0.869808	0.870595	0.932006	0.844615	0.862216	0.869971	0.736692	0.82517	0.709599	0.712231	0.71742	0.843369	0.850101		0.808508	0.121734
680	0.775	0.803	0.851	0.727	0.701	0.713	0.695	0.735	0.753	0.541	0.667	0.629161	0.927536	0.972	0.890361	0.855082	0.968378	0.932864	0.687761	0.746458	0.866356	0.934641	0.887527	0.745654	0.713124	0.73318	0.735138	0.653729	0.73725	0.834977	1.3086	1.00318	0.816752	0.883897	0.972461	0.865147	0.864005	0.86129	0.737302	0.810836	0.73413	0.681327	0.760301	0.840196	0.858255		0.809108	0.128472
690	0.757	0.862	0.836	0.721	0.706	0.685	0.678	0.701	0.79	0.561	0.686	0.655472	0.922227	0.977	0.879856	0.844693	1.07595	0.970673	0.683426	0.735223	0.806247	0.916844	0.931631	0.758911	0.719205	0.74634	0.700253	0.641161	0.736147	0.823108	1.31754	0.975751	0.830691	0.863944	0.934054	0.858907	0.873346	0.842689	0.724795	0.820392	0.764342	0.671079	0.762911	0.84436	0.836989		0.809537	0.132088
700	0.763	0.904	0.884	0.791	0.71	0.72	0.672	0.69	0.752	0.496	0.643	0.629706	0.860095	1.049	0.89761	0.855611	1.06307	1.0406	0.689854	0.751101	0.843706	0.885968	0.923777	0.745372	0.708149	0.733472	0.706923	0.632289	0.711675	0.857683	1.31933	0.947359	0.838184	0.885648	0.940711	0.85951	0.878117	0.830669	0.757741	0.82517	0.718637	0.721038	0.734199	0.855863	0.839083		0.812487	0.140352
710	0.798	0.835	0.842	0.733	0.706	0.707	0.673	0.698	0.805	0.532	0.667	0.660926	0.862965	1.043	0.886514	0.839465	1.07058	1.13797	0.693292	0.771474	0.838479	0.89283	0.911542	0.746219	0.693223	0.734057	0.714874	0.633213	0.744966	0.854071	1.29467	0.949462	0.820237	0.871995	0.925861	0.838777	0.863011	0.842498	0.742488	0.822078	0.74136	0.744736	0.70586	0.809257	0.842719		0.812015	0.136897
720	0.811	0.882	0.839	0.661	0.689	0.696	0.666	0.695	0.781	0.528	0.627	0.640204	0.866552	1.048	0.859883	0.848729	1.05475	1.12794	0.703755	0.768029	0.832381	0.779832	0.903235	0.733714	0.730261	0.718849	0.665369	0.650217	0.75136	0.839106	1.30051	0.978029	0.818408	0.862194	0.950953	0.863738	0.856849	0.82714	0.777569	0.820954	0.704434	0.791332	0.69803	0.821752	0.828174		0.806605	0.140916
730	0.846	0.901	0.8	0.719	0.693	0.697	0.649	0.689	0.785	0.519	0.68	0.65111	0.86483	1.025	0.882667	0.835561	1.06092	1.05232	0.696281	0.771774	0.826283	0.834508	0.888886	0.707859	0.691012	0.728793	0.648183	0.664079	0.744305	0.86336	1.30173	0.953493	0.827294	0.869545	0.915107	0.879438	0.855458	0.852419	0.778789	0.769521	0.719928	0.787489	0.677149	0.808067	0.846024		0.805715	0.13584
740	0.825	0.933	0.808	0.717	0.703	0.713	0.62	0.679	0.766	0.562	0.664	0.655064	0.84675	1.03	0.871867	0.812136	0.955234	1.02354	0.705699	0.754697	0.867227	0.853163	0.870459	0.716603	0.740765	0.734642	0.665113	0.600129	0.678605	0.836009	1.26626	0.929483	0.816055	0.868845	0.922276	0.856088	0.833595	0.835344	0.749809	0.818706	0.750656	0.777081	0.706606	0.822049	0.807128		0.799282	0.126843
750	0.844	0.974	0.798	0.663	0.695	0.726	0.612	0.672	0.755	0.569	0.666	0.618664	0.853638	1.03	0.817717	0.828084	0.86859	0.99443	0.662947	0.734174	0.838915	0.843514	0.896891	0.713406	0.680509	0.745755	0.665882	0.597727	0.692935	0.84633	1.24179	0.945782	0.796802	0.870595	0.904353	0.85629	0.84393	0.840209	0.789466	0.743665	0.749882	0.799178	0.675657	0.828495	0.825419		0.791458	0.127603
760	0.834	0.963	0.816	0.656	0.69	0.698	0.538	0.673	0.757	0.545	0.658	0.6552	0.855646	0.994	0.779398	0.81432	0.84257	1.0135	0.657117	0.718145	0.828461	0.785836	0.902782	0.73033	0.702621	0.744	0.688198	0.586267	0.706825	0.815367	1.23887	0.935792	0.797847	0.875146	0.910498	0.869575	0.86321	0.847268	0.762621	0.776548	0.790681	0.752262	0.756572	0.833453	0.830047		0.788644	0.12778
770	0.854	0.986	0.783	0.663	0.682	0.69	0.584	0.647	0.76	0.564	0.661	0.664607	0.864686	1.007	0.855592	0.825768	0.942358	0.988073	0.711977	0.74436	0.765303	0.821643	0.889792	0.757501	0.688248	0.725283	0.719235	0.600129	0.685439	0.814335	1.2002	0.954983	0.758207	0.856243	0.881821	0.863134	0.856452	0.856521	0.751945	0.760528	0.815987	0.779323	0.673047	0.81372	0.821122		0.790857	0.124132
780	0.806	1.009	0.807	0.667	0.682	0.701	0.531	0.653	0.756	0.53	0.654	0.645248	0.866408	1.059	0.8695	0.800953	0.915801	1.00045	0.717059	0.741664	0.748315	0.701356	0.887224	0.758065	0.676639	0.728793	0.738729	0.618797	0.710352	0.845298	1.19757	0.935705	0.784605	0.848541	0.926885	0.821869	0.870961	0.803769	0.772993	0.738325	0.720444	0.794534	0.681623	0.816694	0.809111		0.78554	0.130099
790	0.855	0.98	0.804	0.693	0.678	0.66	0.538	0.671	0.752	0.529	0.658	0.678921	0.847611	1.011	0.849675	0.808761	0.99574	0.981046	0.693441	0.734324	0.853289	0.805991	0.88511	0.751766	0.718652	0.738151	0.757197	0.6687	0.719171	0.874713	1.18232	0.926416	0.789658	0.853792	0.947368	0.81885	0.882887	0.800526	0.777264	0.730174	0.8054	0.832324	0.654403	0.797457	0.817045		0.795714	0.125102
800	0.842	0.983	0.794	0.643	0.686	0.677	0.528	0.66	0.736	0.532	0.633	0.677149	0.879466	1.028	0.869204	0.833841	0.932165	1.07607	0.699421	0.737619	0.852853	0.82486	0.910787	0.752424	0.719758	0.718849	0.750015	0.637279	0.731738	0.874197	1.20594	0.905472	0.796453	0.851342	0.902304	0.760274	0.889645	0.73938	0.789466	0.724272	0.815212	0.837127	0.675657	0.808464	0.815172		0.794131	0.131993
810	0.827	0.975	0.802	0.667	0.699	0.706	0.584	0.653	0.739	0.581	0.64	0.651655	0.860238	1.015	0.847011	0.827554	0.920093	1.04395	0.69105	0.723538	0.859387	0.834294	0.875443	0.761543	0.71036	0.739614	0.731547	0.660567	0.738793	0.837041	1.21667	0.909679	0.810305	0.867795	0.929445	0.774767	0.914092	0.735946	0.781839	0.773175	0.827607	0.846735	0.640234	0.829189	0.833683		0.797619	0.125138
820	0.805	0.999	0.796	0.65	0.683	0.656	0.54	0.664	0.741	0.599	0.651	0.651519	0.859951	0.962	0.839466	0.799629	0.927604	1.00012	0.689555	0.728332	0.764432	0.833008	0.858375	0.752142	0.695434	0.696915	0.73642	0.703077	0.752241	0.854071	1.18242	0.885405	0.775109	0.853442	0.916643	0.848037	0.878713	0.815884	0.740963	0.728488	0.770023	0.831523	0.660369	0.817785	0.832692		0.78724	0.119423
830	0.887	0.963	0.783	0.642	0.647	0.653	0.517	0.658	0.763	0.6	0.664	0.620708	0.878318	0.912	0.835175	0.79288	0.878515	1.02321	0.68522	0.737919	0.742217	0.782405	0.881183	0.724594	0.708702	0.717095	0.691276	0.681638	0.73769	0.799885	1.17235	0.918704	0.773889	0.84084	0.940199	0.833343	0.883284	0.811877	0.785805	0.737763	0.805658	0.825118	0.654403	0.801324	0.817706		0.782442	0.12115
840	0.858	0.897	0.843	0.664	0.686	0.683	0.527	0.652	0.76	0.602	0.637	0.649747	0.87961	0.935	0.829257	0.831458	0.85625	0.984057	0.626175	0.698821	0.770094	0.756675	0.868495	0.733432	0.684931	0.7285	0.677681	0.704186	0.73725	0.821044	1.1556	0.920632	0.767704	0.852392	0.927397	0.83133	0.862613	0.798236	0.744929	0.77458	0.834063	0.834726	0.634268	0.821553	0.823546		0.78145	0.116173
850	0.868	0.895	0.862	0.698	0.695	0.689	0.592	0.673	0.781	0.677	0.62	0.664198	0.872292	0.928	0.816534	0.822525	0.99413	0.875982	0.621093	0.678748	0.757898	0.746812	0.866381	0.740107	0.691012	0.696915	0.710001	0.674614	0.727549	0.810722	1.15127	0.92221	0.777635	0.819487	0.918691	0.786643	0.86003	0.804151	0.7553	0.767835	0.85472	0.804942	0.616369	0.798647	0.812858		0.78214	0.110422
860	0.865	0.919	0.862	0.682	0.723	0.689	0.603	0.669	0.754	0.65	0.636	0.659835	0.872435	0.94	0.791678	0.810746	0.963013	0.880331	0.640974	0.699121	0.789259	0.725799	0.862453	0.725723	0.729156	0.723821	0.683837	0.68404	0.729974	0.790596	1.13236	0.903983	0.819017	0.854492	0.911522	0.849446	0.876527	0.809397	0.739743	0.831353	0.866857	0.822716	0.651047	0.827106	0.821232		0.788258	0.107137
870	0.848	0.901	0.919	0.696	0.678	0.667	0.591	0.645	0.756	0.649	0.666	0.65111	0.913043	0.772	0.813279	0.81518	0.903194	0.858582	0.655922	0.713801	0.765738	0.730302	0.862453	0.749885	0.712572	0.722066	0.703075	0.680529	0.740557	0.781823	1.11062	0.925101	0.785389	0.855193	0.916131	0.841394	0.873744	0.795279	0.748589	0.784698	0.866599	0.813749	0.617861	0.791408	0.820681		0.780168	0.103582
880	0.857	0.832	0.909	0.678	0.684	0.676	0.561	0.657	0.738	0.652	0.618	0.654109	0.902856	0.766	0.763272	0.805916	0.825133	0.875312	0.658911	0.710955	0.818007	0.846087	0.804906	0.705885	0.7181	0.712415	0.655622	0.660752	0.717187	0.75344	1.1269	0.931498	0.793753	0.862194	0.923812	0.862731	0.857446	0.820463	0.766892	0.801561	0.835612	0.856983	0.637996	0.793094	0.806026		0.775418	0.106132
890	0.88	0.77	0.939	0.698	0.709	0.673	0.592	0.639	0.715	0.634	0.639	0.64961	0.900847	0.802	0.774072	0.814254	0.860542	0.936879	0.664592	0.719344	0.800584	0.855092	0.814422	0.707295	0.7181	0.712123	0.660496	0.686998	0.720494	0.8293	1.10733	0.956034	0.783821	0.820537	0.895647	0.849446	0.843334	0.825614	0.747674	0.847935	0.869181	0.843853	0.6242	0.802713	0.82608		0.781299	0.106506
900	3.626	8.407	12.022	10.015	14.369	10.78	9.805	9.665	13.037	11.454	11.261	10.4794	13.0195	14.653	3.75245	0.957583	4.07282	14.7244	11.3703	12.4759	14.8748	15.2617	8.18953	12.6629	13.3868	12.3971	13.4249	7.66362	8.58662	4.5965	5.1707	3.5701	4.76574	2.89148	3.03209	14.5469	7.93664	7.00756	11.8514	11.137	6.46386	4.62982	6.23454	6.31887	6.7401		9.18417	4.00057
910	11.822	10.979	13.308	14.225	14.24	12.418	11.804	11.095	14.102	11.69	11.673	10.8407	13.9462	15.399	6.33757	1.08186	6.3634	16.2107	11.1574	12.2964	14.657	14.8728	8.52621	12.5593	13.3703	12.1722	12.8277	8.84188	9.33776	7.64948	7.88425	5.74926	6.55946	6.12812	5.73286	14.5696	12.1356	9.84908	13.2489	14.1507	10.8973	10.9065	8.95544	7.53489	8.6977		10.8623	3.24741
920	14.603	11.515	13.422	14.343	14.065	12.825	11.908	11.648	14.907	11.41	11.87	10.9942	14.1004	17.619	7.99179	1.15749	8.45413	15.9473	10.9994	11.9048	13.5333	15.1798	7.89953	12.5051	12.6925	11.8245	12.3737	10.4223	10.6099	9.35659	9.93264	6.95268	8.26475	7.88926	7.34134	14.9573	13.5059	11.3614	13.7696	15.4865	13.9921	11.6005	9.0729	7.85925	9.29944		11.5415	3.03944
930	15.002	13.162	12.906	14.295	13.61	12.847	11.541	11.805	14.994	10.156	11.907	10.8019	14.0244	17.222	8.6512	1.23452	9.01772	14.8893	11.5414	11.8233	14.066	13.5127	7.5976	12.4739	12.3769	11.5335	11.9859	10.1663	10.8473	10.6044	11.0741	8.65733	8.85098	8.59603	7.98145	14.8212	13.5526	11.8614	14.049	15.8457	14.8628	11.7337	8.94202	7.62979	9.87616		11.6651	2.85315
940	14.893	12.458	12.504	14.824	13.431	12.521	10.957	11.904	15.034	10.884	11.977	10.9863	13.9862	16.093	9.19344	1.3531	9.51264	15.8145	11.3575	11.7066	14.2385	14.629	6.81263	12.8204	12.3238	11.0983	12.8226	9.99261	10.221	10.9584	11.7132	9.21955	9.86253	7.61552	6.69252	13.0861	13.6305	10.5855	13.729	15.715	15.5203	11.5312	8.72165	7.62443	9.65589		11.6047	2.89051
950	13.921	13.286	11.816	15.374	13.393	11.7	11.107	11.563	14.644	10.209	11.45	10.276	13.7182	15.788	9.53328	1.47386	10.1489	15.5796	11.3629	11.5245	13.2911	12.9535	6.26344	12.5353	11.876	10.5461	12.6415	9.32483	9.37678	10.9992	11.8897	9.7696	10.3839	6.52544	5.44711	13.537	12.8879	11.1417	13.4377	15.9548	15.5959	11.4703	8.46324	6.95926	9.24489		11.3419	2.93488
960	12.325	12.464	11.239	14.203	12.534	11.542	10.206	11.365	14.163	9.834	11.177	10.1034	13.2154	17.114	10.8471	1.8079	12.1611	14.9205	11.0928	11.1614	13.3782	14.3434	5.77663	12.4062	11.8174	10.0235	12.1098	8.34914	8.20675	10.7623	11.9475	9.85627	10.5067	5.94889	4.88074	12.2731	12.078	10.2843	12.6879	15.3117	15.0235	10.7288	8.05531	6.91404	8.64349		11.0175	2.91754
970	10.042	12.474	10.797	13.726	12.058	11.194	10.059	11.174	13.751	9.202	11.181	9.40606	12.8479	16.249	12.7976	2.6201	14.8411	14.7528	11.0025	10.9991	13.0981	13.4716	5.37576	12.0022	11.3647	9.09734	11.8571	6.37168	6.01529	9.71525	11.6155	9.34662	10.2542	7.19405	6.03397	12.6288	11.5197	9.74491	12.5372	14.8345	14.9625	10.6663	7.9524	6.54922	8.19183		10.7461	2.89631
980	8.798	12.648	10.449	13.457	11.673	11.161	9.995	10.746	13.734	10.331	11.115	9.54989	12.6289	16.454	13.3183	3.51429	14.9771	15.2654	10.6868	10.6568	11.9661	11.42	5.14784	11.637	10.9749	8.75721	11.2777	4.51141	4.57452	8.31261	11.8519	9.72009	10.5557	7.67573	6.3443	12.11	10.7705	9.04827	11.8191	14.0731	14.5633	9.84217	6.99559	6.32809	7.90236		10.4297	2.94793
990	6.683	11.386	10.219	12.869	12.188	11.126	9.915	10.817	13.306	9.657	10.706	8.39204	12.4213	16.087	13.9479	4.8654	16.0684	15.5311	10.133	10.2919	12.0959	12.0056	4.68353	10.9312	11.0711	7.60758	9.91256	3.54348	3.52773	6.51468	11.6796	9.89649	10.2753	7.13874	5.44046	11.6821	9.75429	8.24688	11.0394	13.6695	14.3082	7.57674	4.85377	5.89148	7.29567		9.93894	3.24014
1000	4.556	11.061	9.548	12.59	12.046	11.084	9.769	10.327	12.979	9.834	10.773	8.9953	12.4219	15.91	13.8519	5.85224	15.4613	15.5301	9.40114	9.6656	11.0919	10.4397	4.52599	10.2719	10.866	7.28296	9.85562	2.9622	2.91394	4.37202	11.5862	9.87397	9.83962	5.68775	3.99687	11.389	8.58837	7.82831	10.6395	13.3188	13.8503	7.7556	5.824	5.41531	7.18955		9.53382	3.34428
1010	3.293	10.836	9.168	12.285	12.097	11.095	9.503	10.082	12.328	10.033	10.727	8.5221	11.4741	15.682	13.0003	6.4012	12.7987	14.3309	9.2116	9.11119	11.3763	12.5461	4.16243	9.59178	10.4288	6.91242	9.08534	2.14952	2.13503	2.92294	11.1965	9.33899	9.52224	4.88961	3.21132	10.8415	7.50792	7.0915	10.206	12.5012	13.3223	7.78234	6.09247	5.15075	6.96642		9.08691	3.36809
1020	2.51	10.249	8.665	12.64	11.353	10.944	8.898	9.428	11.435	10.276	10.964	8.7769	11.4171	14.957	12.2924	6.5663	12.9116	14.9171	8.7083	8.5788	10.4154	10.8272	3.74661	9.49372	9.62497	6.76765	8.70802	1.59856	1.46987	2.55447	10.995	9.0478	9.1065	4.32462	2.76529	11.4307	7.271	7.14244	9.81921	12.3891	13.1795	8.10611	6.50637	4.75271	6.80334		8.78519	3.41407
1030	2.052	10.16	8.628	12.172	11.302	10.832	8.873	8.711	10.527	9.519	10.793	7.97623	11.2148	14.842	11.4608	6.56333	11.7842	14.6682	8.7092	7.97675	9.30777	9.24821	3.31176	8.96073	9.07271	6.44654	7.82719	1.30635	1.19274	2.55138	10.8849	8.4684	9.0335	4.03617	2.69411	10.9043	7.05793	6.68075	9.47145	11.7115	12.8309	8.57335	6.82183	4.29558	6.78065		8.40522	3.33356
1040	1.937	10.013	8.544	11.136	11.724	10.772	9.236	8.314	9.555	10.069	10.809	7.92852	10.7836	14.259	10.1285	6.32808	9.63711	14.7752	8.78364	7.64539	9.56432	10.3829	3.37172	8.44204	8.51216	6.21463	7.4881	1.00601	0.916491	2.31657	10.5321	7.88303	8.73755	4.13139	2.91585	11.4146	6.46881	6.76956	8.81895	11.3582	12.1022	8.2752	6.90088	4.2818	6.25571		8.16531	3.25484
1050	1.947	8.866	8.027	10.265	11.387	11.068	9.142	7.914	9.255	9.893	10.602	8.33696	10.0682	13.704	8.88526	5.98432	9.35545	12.1704	8.23549	7.05951	9.04643	8.4137	3.6211	7.87295	8.42592	5.75898	7.33317	0.859994	0.830729	1.54558	10.6992	8.08081	8.51836	4.22905	3.11454	11.8457	6.41117	6.6423	8.84946	10.6999	11.69	8.72419	6.90722	4.17708	6.46121		7.84277	3.0628
1060	1.666	8.475	7.94	9.006	11.454	11.469	9.458	7.576	8.631	10.186	10.667	8.21413	9.94303	13.828	8.82164	5.88896	9.64918	12.5592	8.3778	6.74613	8.88396	8.26489	3.63801	7.28308	8.18877	5.35014	7.10231	0.82802	0.827862	1.41038	10.6511	7.74099	8.27154	4.1916	3.09917	12.4265	6.09136	6.70927	8.85251	10.7148	11.548	8.81722	6.83861	4.0324	6.17142		7.74422	3.13359
1070	1.59	8.251	7.821	8.388	11.604	11.839	10.008	7.731	8.341	9.2	10.455	7.54366	9.22313	14.314	8.01221	5.61507	8.27655	12.0322	8.34626	6.46001	8.69318	8.23101	3.59104	6.75875	7.56299	5.08693	6.46054	0.957582	1.03532	1.1957	10.334	7.66501	7.93317	4.12894	3.05821	12.0456	5.57042	6.29889	9.09716	10.6974	11.4571	9.15748	7.18613	4.1984	6.12855		7.54624	3.1081
1080	1.509	7.936	8.266	8.044	11.198	11.657	9.848	7.448	8.033	10.976	10.458	8.51446	8.84833	13.667	8.21416	5.6068	8.53165	11.792	7.98168	6.18048	8.94581	9.16651	3.4696	6.44557	6.98696	4.90268	6.38359	1.65918	1.88523	0.989794	9.99051	6.94908	7.55951	3.83979	2.85849	11.2203	5.27188	5.6487	8.27566	9.98186	10.8537	8.73251	7.00789	4.09289	6.00624		7.41852	3.00182
1090	1.229	7.896	8.356	7.657	11.531	11.507	10.629	6.785	7.455	11.033	10.114	8.38236	8.82494	15.007	8.23325	5.60561	8.98338	11.6227	7.9165	6.04342	7.77107	8.46065	2.95107	6.37882	6.89796	4.97638	6.06142	2.18649	2.41414	0.956766	9.8058	7.34508	7.18759	3.71307	2.79858	10.1185	4.51719	4.69689	8.56698	10.0055	10.6938	9.17173	7.27786	3.94772	6.00007		7.32694	3.07041
1100	1.098	7.794	8.21	5.393	10.77	10.892	9.741	6.69	7.362	11.185	9.817	8.37145	8.30119	13.58	8.08589	5.52945	9.06144	11.9218	7.75865	5.89646	8.20664	10.016	2.91165	6.40496	6.69839	4.99773	6.00089	1.17974	1.16981	1.09713	9.04418	7.33518	6.4807	3.62975	2.59477	10.2735	4.5798	4.53472	8.32661	9.82081	10.5125	9.08735	7.25176	3.74553	5.83369		7.09316	3.06736
1110	1.098	7.736	8.55	4.521	10.725	10.193	9.721	6.19	6.548	11.15	10.14	8.2354	8.23461	11.813	8.56525	5.62513	9.59231	11.8866	7.79542	5.98514	7.96664	8.99884	3.00439	6.39565	6.51652	5.0647	5.90675	0.79013	0.785312	1.21531	8.70637	6.83981	6.78431	3.55169	2.55738	10.9182	4.90795	4.69374	7.7888	9.23735	9.91166	9.11233	7.30843	3.52321	5.3255		6.93591	3.00102
1120	1.001	7.758	8.472	4.643	10.788	10.083	10.585	6.634	7.056	10.94	10.044	8.12333	7.78505	12.268	7.97004	5.34291	8.56089	12.0998	7.51111	5.85452	6.22609	8.12617	2.44583	5.75323	7.19648	4.98135	5.56201	0.703447	0.712336	1.23905	8.38164	6.67875	6.70939	3.53209	2.70282	10.5667	4.58477	4.44467	7.43586	8.70391	8.92602	8.69665	7.02728	3.30714	5.22358		6.74193	2.98906
1130	1.031	7.502	9.168	5.376	11.205	10.472	10.955	6.398	6.88	11.01	10.096	7.80855	7.51557	11.618	8.05452	5.30261	9.07217	12.3882	7.40737	5.8659	5.47516	6.70073	2.24329	6.06236	6.62874	5.04745	5.57612	0.639682	0.666479	1.46044	8.10161	6.72992	6.4225	3.46103	2.68899	10.7	4.62313	4.45374	7.23392	8.73848	8.64352	8.98583	7.13355	3.10961	5.35217		6.71121	3.01963
MAX	15.002	13.286	13.422	15.374	14.369	12.847	11.908	11.904	15.034	11.69	11.977	10.9942	14.1004	17.619	13.9479	6.5663	16.0684	16.2107	11.5414	12.4759	14.8748	15.2617	8.52621	12.8204	13.3868	12.3971	13.4249	10.4223	10.8473	10.9992	11.9475	9.89649	10.5557	8.59603	7.98145	14.9573	13.6305	11.8614	14.049	15.9548	15.5959	11.7337	9.0729	7.85925	9.87616		12.5081	2.53363

## Sheet: STIM1_C17
Time [s]	cell 1	cell 2	cell 3	cell 4	cell 5	cell 6	cell 7	cell 8	cell 9	cell 10	cell 11	cell 12	cell 13	cell 14	cell 15	cell 16	cell 17	cell 18	cell 19	cell 20	cell 21	cell 22	cell 23	cell 24	cell 25	cell 26	cell 27	cell 28	cell 29	cell 30	cell 31	cell 32	cell 33	cell 34	cell 35	cell 36	cell 37	cell 38	cell 39	cell 40	cell 41	cell 42	cell 43	cell 44	cell 45	cell 46	cell 47	cell 48
0	1.03151	0.984184	0.966896	1.13928	1.12336	1.1384	1.17462	1.05077	1.06873	1.10619	1.02536	1.09624	1.14062	1.02867	0.985084	0.995169	0.9365	1.00144	0.757422	0.9432	0.861785	1.12289	0.915515	0.901176	0.962687	0.896522	1.019	0.977938	1.0598	1.00755	1.00384	1.0293	1.07124	1.01152	1.00267	1.061	1.18704	1.05305	1.0094	1.03618	1.00337	1.13927	1.14773	1.10202	1.07461	1.08283	0.977677	0.828122
10	1.01019	0.998106	0.931648	1.04141	1.10957	1.14417	1.23121	1.02333	1.0486	1.05707	1.03663	1.03695	1.05629	1.09135	0.996771	1.00436	0.912704	1.00422	0.810215	0.980751	0.935927	1.17698	0.999157	1.03411	1.03451	0.995919	1.01842	1.01262	1.07376	1.04371	1.01401	1.02995	1.06525	1.04172	1.06711	1.02066	1.17698	1.07721	0.98898	1.08184	1.00967	1.11771	1.1459	1.10874	1.1342	1.03101	0.981942	0.898647
20	1.02397	0.997929	0.952128	1.15075	1.01423	1.0143	1.05459	1.04485	0.974634	1.10305	0.990969	1.07779	1.07433	1.08401	0.992926	1.02144	0.945712	1.00701	0.824581	0.997476	0.941876	1.17505	0.994188	1.03114	1.03835	0.979887	1.03171	0.969172	1.02389	0.974952	1.02226	0.995023	1.00087	1.03788	0.995405	1.02307	1.0116	1.03038	0.977371	1.08517	1.00127	1.0742	1.08547	1.11951	1.16791	1.07203	0.98962	0.900421
30	1.02102	1.0078	1.00398	1.0231	1.02088	1.02805	1.07259	1.03113	1.04099	1.06626	1.01539	1.0236	1.05079	1.0876	1.02722	1.04797	0.999446	1.05121	0.87091	0.976964	0.937757	1.12723	0.993351	1.02939	1.02032	0.997862	1.08348	0.972983	1.02524	0.99782	1.02254	1.01194	0.990393	1.02744	1.00407	1.01676	1.00728	1.0432	1.00639	1.03061	0.993255	1.08945	1.06063	1.06447	1.09656	1.0105	1.01237	0.833001
40	1.03808	1.00048	1.0375	1.09193	1.0839	1.09394	1.08717	1.01741	0.987959	1.0638	1.00672	1.04323	1.09551	1.09614	1.0226	1.01277	0.982558	1.01906	0.89174	0.982013	0.933181	1.10309	0.993665	1.01549	1.00881	1.00933	1.0009	1.00271	0.988992	0.973098	1.03546	0.992203	0.952714	1.03293	0.970098	1.00462	1.08124	0.995262	1.0106	1.03801	0.990678	1.08254	1.09453	1.07744	1.12636	1.04504	1.04195	0.89155
50	1.02298	1.01925	1.07189	0.996014	1.03078	1.04584	1.09874	1.00961	1.03555	1.02253	0.994726	1.00907	1.08766	1.03602	1.01845	1.03747	0.988699	1.00577	0.928013	1.00757	0.98627	1.04658	0.993717	1.0016	1.00891	1.00107	0.943968	1.02863	1.03515	0.98994	1.01649	0.973114	0.951716	1.00959	1.00501	0.995238	1.02207	1.00214	0.995786	1.05562	1.04069	1.02629	1.04771	1.04314	1.09578	0.952198	1.00412	0.755822
60	1.02561	1.01696	1.02381	1.13098	1.05699	1.04809	0.96842	1.02333	1.02902	1.03935	0.970017	1.06601	1.11198	1.07001	1.03229	1.02748	1.07621	0.987533	0.957821	0.982644	0.970481	1.05093	1.00999	1.01243	1.01627	0.988923	0.947405	1.02863	1.04483	1.02316	0.94993	1.03797	1.03955	1.00108	0.966349	1.01898	0.931885	0.962929	1.02481	1.0013	1.01024	1.01366	1.05136	1.02958	1.04717	1.01266	1.0283	1.06676
70	0.999034	1.00489	0.976489	0.938415	1.01517	1.02779	0.968848	0.990594	1.00128	1.04496	1.00802	1.07543	1.05197	0.962236	1.03106	0.994381	1.03936	1.01721	1.01744	0.998422	1.01968	0.988624	1.00177	0.99041	0.986733	0.995142	1.01189	1.03472	0.993946	0.988704	0.983758	1.0293	1.01709	1.00218	1.01415	1.02595	0.948525	1.03094	1.02621	1.03033	1.02294	1.04932	1.0861	1.0088	1.01398	0.989984	0.977108	1.19672
80	1.04989	1.00498	1.00333	0.947445	0.934586	0.913843	0.994141	1.01554	1.00808	1.05258	0.9849	1.05698	1.06766	0.946523	1.03537	1.00463	1.01403	1.00422	1.02498	1.05459	1.01854	0.9978	0.997169	1.0064	0.995854	1.00641	0.990359	1.05645	0.986291	0.944051	0.990634	0.997626	0.97093	0.990375	1.04789	1.03948	0.992901	1.02016	1.03922	1.0531	1.03315	1.01556	1.04105	0.956214	0.965634	0.996461	0.997867	1.21801
90	1.00363	1.00181	0.982849	0.920111	0.933576	0.924254	0.879251	0.961908	1.01488	0.945822	0.965682	0.975308	0.947637	0.890846	0.982931	1.00568	0.955691	1.02246	1.02103	1.03597	1.02792	0.982828	1.0103	0.994693	1.00715	0.998057	1.03675	1.05073	1.00757	0.997047	1.01016	1.0152	0.971429	1.0085	0.989078	1.01604	1.03769	1.02945	1.03542	0.948697	1.02857	0.983707	1.00673	0.938094	0.961976	0.97271	0.979952	1.15591
100	1.01642	0.996343	0.976166	0.928409	0.936333	0.929762	0.849243	0.977498	1.00672	0.993147	1.00383	0.994547	0.998627	0.993833	1.00877	1.00252	1.03015	0.977952	1.07598	1.0486	1.054	0.9978	1.01501	1.00693	1.01907	1.01341	1.06527	0.958882	0.967265	0.976497	0.971657	0.976801	0.95471	0.99367	1.00806	1.01339	0.961468	1.05658	1.03382	0.998375	1.06332	0.968733	0.963633	0.932814	0.925911	0.979188	0.945827	1.17143
110	0.997722	0.997577	0.964956	0.900098	0.902509	0.88669	0.836811	0.974068	0.987959	0.939766	0.993425	0.925835	0.961365	0.87667	0.99185	0.984135	0.985628	1.01133	1.118	1.03944	1.05606	0.921009	1.00486	1.00946	0.991086	1.02264	1.03389	0.929155	0.980662	1.01142	0.974408	1.00218	1.00362	0.968135	0.994702	0.961156	0.920996	0.980582	0.995185	0.921506	0.994114	0.876984	0.850004	0.953722	0.920946	0.965153	0.995308	1.09337
120	0.982301	0.994053	1.03642	1.01383	0.912606	0.886256	0.892112	0.978122	0.998565	0.925188	0.984322	0.916805	0.919004	0.927566	0.959711	0.972838	0.982558	0.988152	1.11441	0.988009	1.05286	0.824899	0.997431	0.98202	0.990257	1.01263	0.992192	0.970315	0.926174	0.956257	0.960931	0.978103	0.989644	1.00053	1.00056	0.970713	1.03502	0.96107	0.96336	0.966767	1.01836	0.950656	0.923277	0.964789	0.938978	0.982427	1.0118	0.909736
130	0.976724	0.997048	1.01551	0.935486	0.932799	0.925165	0.917405	0.967209	0.965388	0.954794	1.00715	0.934866	0.918219	0.979657	0.999231	0.964431	1.02631	1.02957	1.09142	0.989587	1.03776	0.874644	1.0057	1.00553	0.991915	1.02176	1.0269	0.96498	1.01016	1.00817	0.994209	0.987431	0.969682	0.959623	1.00197	0.959052	0.967631	0.945275	0.980774	0.975544	1.00538	0.92343	0.901379	0.94878	0.944989	1.00834	1.02318	1.01486
140	0.963272	0.999868	1.04084	1.01896	0.96309	0.952101	0.90583	0.9934	0.943905	0.948065	1.00065	0.959602	0.951559	1.00903	0.964632	0.953922	1.01326	0.964043	1.10291	0.983275	1.04165	0.944191	1.00899	0.991809	0.996683	1.01244	1.05806	0.949735	0.932253	0.983759	1.00329	0.987431	0.999875	0.993944	0.975722	0.982615	1.00461	0.950293	1.00119	0.994703	0.964429	0.929093	0.911345	0.914482	0.886188	0.984586	1.01237	0.95764
150	0.952117	0.993172	1.02295	0.937683	0.981498	0.990011	0.984281	0.980928	0.952335	0.919356	1.0034	0.899529	0.829967	0.966677	0.975242	0.987287	1.03015	0.990624	1.11907	0.981067	1.02449	0.916662	1.00549	0.978349	0.96704	1.0309	0.920372	1.03206	0.956458	0.995193	0.988709	0.969643	1.00761	0.985158	0.994467	0.978948	1.00584	0.995819	1.00439	0.949902	0.962329	0.937587	0.897589	0.929139	0.911015	0.961914	1.01436	0.948326
160	0.939322	0.993788	0.992982	0.996746	1.03812	1.02792	1.0593	0.989035	0.956414	0.923842	0.992703	0.972166	0.917827	0.995199	0.992157	1.00095	1.03092	0.984134	1.1259	0.976333	1.01991	0.863536	1.02338	1.00317	0.987251	1.01603	0.911437	1.03549	0.992257	1.06441	1.03381	0.988949	1.01709	0.965389	0.985563	0.960134	0.871485	0.941002	0.958957	0.909574	0.94448	0.907422	0.885447	0.954778	0.887756	0.989984	1.00583	1.12353
170	0.946211	0.991762	0.999665	0.889359	1.01	1.02341	1.02544	0.971262	0.978985	0.894236	1.01611	0.936044	0.818984	0.957966	0.9837	0.982559	1.05011	0.934061	1.14816	1.03408	1.07986	0.88527	1.03033	1.00588	0.977094	1.00107	0.908001	1.02481	0.995297	1.06426	1.02391	0.997843	1.02658	0.970331	0.977127	0.952199	0.835738	0.924649	0.948148	0.922768	0.913745	0.914391	0.900116	0.953469	0.900039	0.962994	1.00043	1.03615
180	1.23395	1.04128	1.08676	1.13269	1.04014	1.0359	1.16219	1.17487	0.935475	0.830538	0.983455	0.932903	0.933124	0.921417	1.02553	0.976779	1.16832	0.960334	1.0828	0.864942	0.961556	0.738932	1.06292	0.977737	0.987562	1.03741	0.852446	1.08427	0.945988	1.04618	1.03024	0.996541	0.993886	0.957976	0.940807	0.966445	0.90189	0.956611	0.979573	1.02958	0.944575	1.04333	1.0946	1.03537	0.999085	1.02561	1.43381	1.43003
190	2.32583	1.16419	1.24155	1.69476	1.02837	1.06874	1.32209	1.97838	0.931124	0.852967	0.992414	0.884609	0.894685	0.899898	0.985391	0.990177	1.11689	0.93128	1.06628	0.869359	0.934325	0.756319	1.05832	0.980971	0.976057	1.04353	0.965274	1.00385	0.932366	1.0451	1.03024	0.979404	0.989644	0.996415	0.984626	1.08582	1.10589	1.16157	1.21276	1.19164	1.24725	1.0533	1.34094	1.12323	1.10231	1.31926	2.21044	1.99113
200	3.37473	1.31777	1.51006	3.50472	1.11249	1.10088	2.06716	3.3132	0.922421	0.849603	0.970161	0.913271	0.906844	0.908437	1.03306	0.975728	1.16525	0.981661	1.0749	0.885768	0.927231	0.762114	1.05502	0.979311	0.976575	1.03002	0.892996	1.0008	0.913228	1.00354	1.01594	0.962484	0.943731	1.0571	1.14701	1.24061	1.35838	1.62241	1.88369	1.30935	1.5734	1.29979	1.67881	1.20834	1.17549	2.1473	2.88127	2.4134
210	3.89837	1.46456	1.89035	4.36528	1.14429	1.16195	2.87997	4.3724	0.941457	0.951878	1.02521	0.996117	0.880173	0.904509	1.02199	1.04981	1.13224	0.977643	1.14134	0.972862	0.943021	0.938395	1.04665	0.971095	0.977508	1.04848	1.02713	0.8899	0.890375	1.04958	0.951031	0.941009	0.971678	1.21799	1.42984	1.42202	1.42762	2.23135	2.55722	1.44674	2.00407	1.43913	2.00707	1.32657	1.2876	3.37804	3.40566	2.89776
220	4.12376	1.6206	2.35321	5.48845	1.27217	1.26298	3.57531	4.94206	0.938738	1.26184	1.12651	1.4555	1.03354	0.910999	1.05767	1.19221	1.13455	1.08891	1.35323	1.30104	0.999314	1.9275	1.01705	0.949158	0.938018	1.01904	1.00708	0.9444	0.876415	1.04062	0.94443	0.91628	0.984903	1.50025	1.68267	1.63895	1.83686	2.65502	2.9167	1.64711	2.36363	1.56769	2.25348	1.42887	1.33255	4.37234	3.64595	3.46817
230	3.93708	1.74986	2.87999	5.34006	1.33136	1.39315	4.01643	4.88999	0.977897	2.01994	1.3421	2.26158	1.15317	0.892724	1.0915	1.5608	1.16141	1.31115	1.93216	2.08867	1.12059	4.80596	1.01616	0.922851	0.930763	1.02108	0.916477	0.93754	0.893189	1.02949	0.922428	0.934285	0.973674	1.95741	1.73868	1.82908	2.27856	2.94806	3.07623	1.73735	2.60522	1.59916	2.39364	1.41185	1.291	4.87867	3.3394	4.15303
240	3.69757	1.83242	3.13298	5.56899	1.51687	1.51555	4.35081	4.51894	1.07308	3.36746	1.67416	3.40612	1.60267	0.979315	1.16193	2.0794	1.1783	2.0647	3.00778	4.03029	1.22563	5.47921	0.991782	0.929318	0.937085	1.00583	0.926672	0.967267	0.848271	1.02517	0.829195	0.884826	0.952464	2.56174	1.79796	2.09344	2.67465	3.08539	3.06262	1.82007	2.79211	1.63908	2.482	1.56852	1.41382	4.734	3.14148	3.83012
250	3.41017	1.85488	3.23775	4.64668	1.55325	1.59129	4.30966	4.08211	1.36133	4.45324	2.16834	3.61186	1.72701	1.07769	1.31878	2.64529	1.22513	3.87255	4.8832	6.89681	1.51556	4.61712	0.985714	0.9232	0.919569	0.978138	0.922434	0.960407	0.878104	1.03413	0.82397	0.890249	0.939488	3.05487	1.84928	2.25935	3.34316	3.10694	2.89508	1.86676	2.88517	1.7513	2.50741	1.55998	1.29675	4.49433	2.85653	3.60257
260	3.05419	1.85057	3.35525	4.31988	1.62316	1.6056	3.82952	3.62532	1.73715	5.3782	2.71888	3.98094	2.49147	1.37862	1.50392	3.2829	1.31954	6.0476	6.699	7.78921	1.86613	4.55192	0.970753	0.907556	0.895419	0.964924	0.992535	0.878467	0.870561	1.03629	0.801693	0.900662	0.973175	3.59467	1.99643	2.46955	3.34418	2.83694	2.62307	1.87451	2.74677	1.77782	2.44375	1.5441	1.27662	4.19421	2.63927	3.39277
270	2.74677	1.84325	3.42078	3.91401	1.62949	1.69379	3.73221	3.2022	2.72892	5.30104	3.44224	4.05279	3.35948	1.66555	1.58404	3.70824	1.44851	6.72326	7.8838	6.93689	2.67551	3.98927	0.976089	0.910877	0.900394	0.984843	1.00617	0.84874	0.868872	1.04325	0.859723	0.916063	0.976419	3.95189	1.92825	2.56657	3.33966	2.64666	2.53	1.85787	2.50156	1.79519	2.33946	1.50389	1.23559	3.8401	2.49083	2.93058
280	2.69362	1.80484	3.06205	3.35291	1.66486	1.67956	3.42141	2.7504	3.67473	4.72956	3.83831	3.76734	4.5758	2.08911	1.76503	3.83434	1.54523	6.73161	8.55898	5.75734	4.29382	3.27497	1.03169	0.905808	0.931799	1.08133	0.92587	0.98899	0.81157	1.01636	0.665556	0.973331	0.855895	3.95189	1.85232	2.70753	3.37808	2.47477	2.38928	1.81433	2.36354	1.60782	2.11908	1.46452	1.16869	3.42878	2.42229	2.33089
290	2.30254	1.7429	2.94111	2.75545	1.6884	1.77854	3.31252	2.26119	4.72088	4.18162	4.29463	3.4764	4.41616	2.55042	1.85176	3.84879	1.6811	6.43612	8.77769	4.80562	6.33593	2.77365	1.02024	0.896631	0.916148	1.19024	1.00949	0.912386	0.822828	0.991021	0.701584	1.00847	0.925515	3.60428	1.76328	2.70747	2.62288	2.29286	2.21495	1.74039	2.18953	1.66254	2.08265	1.47922	1.21913	3.1524	2.21783	2.16323
300	1.94853	1.67311	2.97905	2.57607	1.7508	1.86616	2.93527	2.01705	5.00452	3.67204	4.35229	3.34722	4.08668	2.68808	1.92988	3.68459	1.7402	5.70266	8.68288	4.16851	7.70229	2.43703	1.07506	0.968123	0.972222	1.53284	1.00399	0.970697	0.89409	1.05252	0.767315	1.10348	1.04304	3.44531	1.62995	2.71342	2.59596	2.08343	2.04561	1.70505	2.0433	1.64414	1.91674	1.40543	1.13184	2.77886	2.06256	1.9206
310	1.73625	1.6028	2.72499	2.47429	1.751	1.81138	2.99143	1.77914	4.97651	3.10773	4.3309	3.1136	3.58109	2.87988	1.76964	3.49097	1.71871	5.06996	8.15028	3.28211	8.61739	2.11199	1.16257	1.07493	0.981965	2.0855	1.01373	1.07627	0.813034	1.01976	0.876499	1.26487	1.29757	3.4648	1.50248	2.64393	2.47434	2.06169	1.93172	1.61631	2.02345	1.78936	1.80178	1.33079	1.09944	2.4755	1.92976	1.82613
320	1.7228	1.57663	2.46445	2.05914	1.72945	1.81589	2.77279	1.54685	4.5686	2.67441	4.38827	2.73903	2.82016	3.09542	1.89451	3.51672	1.82925	4.92654	7.8012	2.61502	8.01144	1.93088	1.27472	1.22412	1.01213	2.78498	1.08841	1.15096	0.847257	1.06287	1.08772	1.72301	1.65989	3.44229	1.44132	2.64585	2.37039	1.89538	1.84225	1.61126	1.94069	1.71177	1.62638	1.30714	1.14857	2.33299	1.7907	1.80173
330	1.59747	1.51901	2.14334	2.06061	1.73943	1.78153	2.49328	1.41277	4.11609	2.18165	4.1367	2.50619	2.58521	2.83837	1.72474	3.25505	1.83385	4.30095	7.06784	2.20795	7.77574	1.79131	1.55505	1.46779	1.17475	4.11776	1.41338	1.49663	0.904785	1.07322	1.36714	3.55189	1.99002	3.12296	1.43781	2.46925	2.36217	1.76159	1.81803	1.6042	1.85813	1.76557	1.52525	1.24306	1.08689	2.14622	1.70397	1.61721
340	1.33631	1.46112	2.00116	1.78189	1.65919	1.78409	2.59831	1.28057	3.65025	1.96364	4.13814	2.19994	1.87527	2.74342	1.7555	3.08875	1.87914	4.38935	6.42175	1.91448	6.70526	1.58991	1.88935	1.73033	1.28451	5.34726	1.89595	2.25467	0.954881	1.16562	1.58798	9.96064	2.35758	2.81325	1.29159	2.42826	2.44661	1.61479	1.69254	1.51684	1.6615	1.7158	1.40502	1.2268	1.08585	2.07173	1.62207	1.67354
350	1.23821	1.41328	1.81317	1.73503	1.66906	1.76197	2.45427	1.19794	3.13058	1.60657	3.7438	1.9514	1.70151	2.54649	1.65401	2.67918	1.89603	4.08459	6.1646	1.73651	6.13478	1.50346	2.26624	1.93092	1.49046	6.57579	2.82297	3.75435	1.00509	1.20903	1.84651	9.6743	2.62882	2.64246	1.22902	2.33809	2.11749	1.4273	1.54362	1.49521	1.42899	1.67828	1.3055	1.20568	1.08977	1.93462	1.48983	1.61322
360	1.16242	1.33759	1.68986	1.41263	1.58591	1.73638	2.22492	1.0779	2.85646	1.40629	3.51116	1.78571	1.34772	2.31388	1.60141	2.40149	1.91752	3.97517	5.63667	1.58157	5.32128	1.53244	2.67907	2.19626	1.81996	7.12038	3.78286	5.25365	1.06509	1.29077	2.19634	8.70813	2.79376	2.50298	1.16529	2.28664	1.93999	1.29778	1.42673	1.43159	1.37916	1.62312	1.18787	1.17278	1.08245	1.73922	1.48784	1.45975
370	1.09648	1.29697	1.50866	1.41604	1.61345	1.71335	2.22964	1.01616	2.36343	1.27597	3.22708	1.74448	1.41165	2.14548	1.56758	2.28668	1.94055	3.61416	5.11197	1.4787	4.48101	1.46772	3.08472	2.31635	2.2244	7.3835	3.96567	5.90879	1.21021	1.44945	2.38968	7.86474	2.64255	2.36954	1.16505	2.1562	2.02175	1.19465	1.34606	1.34147	1.43729	1.55664	1.09951	1.09518	1.03567	1.68416	1.43239	1.37325
380	1.02102	1.26428	1.37273	1.11194	1.61628	1.8057	2.06588	0.974692	2.11053	1.18805	3.10454	1.57447	1.07001	1.88861	1.52145	2.10593	1.88835	3.03338	4.58978	1.40581	3.8254	1.40301	3.57005	2.44343	2.82639	7.53488	3.80657	6.44882	1.32729	1.56626	2.28297	6.95713	2.45814	2.16938	1.10108	2.09669	1.80234	1.17365	1.33525	1.35249	1.44225	1.52517	1.0421	1.08825	1.01686	1.60967	1.34907	1.37325
390	0.995425	1.22032	1.35441	1.16539	1.6571	1.80964	2.002	0.931663	1.77468	1.09609	2.8378	1.57997	1.16846	1.64745	1.48901	1.91888	1.91445	2.69091	4.15954	1.33007	3.51373	1.3267	3.90232	2.42603	3.40599	7.28216	3.45137	5.73538	1.47127	1.6928	2.56927	6.04628	1.93562	2.04665	1.09077	2.05041	1.86952	1.10806	1.27721	1.34027	1.36561	1.47284	0.991426	1.03816	0.995688	1.51574	1.31494	1.38922
400	0.960319	1.19397	1.28628	1.09217	1.58867	1.79915	1.90083	0.890817	1.43693	1.01288	2.63536	1.45354	1.0202	1.54771	1.41412	1.75311	1.88835	2.34968	3.80938	1.33575	3.15423	1.33442	4.32576	2.44526	3.81841	7.10328	3.98801	4.44112	1.50347	1.72896	2.65205	5.14366	1.62121	1.92419	1.06383	1.9401	1.62217	1.0393	1.20255	1.263	1.26729	1.34433	0.929313	1.02025	0.992552	1.54489	1.25323	1.44245
410	0.937681	1.16463	1.18086	1.07607	1.55547	1.69626	1.7868	0.864314	1.25636	0.955018	2.3861	1.42802	1.14415	1.31202	1.36291	1.57761	1.90064	2.18308	3.43767	1.34143	2.90618	1.28758	4.56298	2.34799	4.04571	6.69073	3.5304	4.07372	1.62697	1.86709	2.55607	3.72911	1.32027	1.81738	1.03196	1.86809	1.46254	0.955867	1.13369	1.19875	1.19914	1.37314	0.892746	0.994103	0.956488	1.49739	1.16792	1.40608
420	0.902247	1.12481	0.99158	0.932558	1.51446	1.66633	1.84167	0.854337	1.10272	0.918235	2.24073	1.269	0.931947	1.26317	1.3014	1.4833	1.81006	2.04801	3.20962	1.32534	2.53661	1.2417	4.79931	2.36136	4.15267	6.27565	2.77635	3.5375	1.79651	2.07598	2.48951	2.62433	1.11591	1.71442	0.997748	1.75142	1.37112	0.930967	1.08766	1.11741	1.13423	1.27948	0.859479	0.977503	0.954136	1.48012	0.976824	1.38257
430	0.871735	1.10366	1.05798	1.00651	1.49454	1.59081	1.85753	0.835317	1.04072	0.871807	2.05635	1.29059	1.09159	1.1858	1.27879	1.42813	1.81773	1.92098	2.98516	1.27233	2.26201	1.19388	4.75051	2.18673	4.15951	5.78576	2.94473	2.84006	1.78705	2.05095	2.36988	1.90046	0.967935	1.70206	1.01603	1.66125	1.34667	0.889343	1.05163	1.13421	1.11161	1.28754	0.850285	0.950977	0.923298	1.35165	0.930755	1.29341
440	0.862877	1.0737	0.997078	0.972828	1.44328	1.52432	1.64533	0.810061	0.974906	0.840182	1.97587	1.23837	0.949598	1.21569	1.23512	1.36744	1.82234	1.823	2.62817	1.27106	2.11167	1.15863	4.66828	2.03431	3.97523	5.34464	2.48025	2.72649	1.74765	1.9839	2.11905	1.41151	0.862882	1.6315	0.984391	1.62453	1.31236	0.884512	1.02981	1.11081	1.1097	1.2766	0.849372	0.917692	0.89246	1.42506	1.01749	1.29563
450	0.835317	1.0419	0.998263	1.00016	1.43275	1.46897	1.47814	0.810996	0.928132	0.816632	1.82718	1.21835	1.01039	1.17914	1.22728	1.27969	1.7663	1.90614	2.34769	1.19407	1.87506	1.0345	4.55785	1.95076	3.83116	4.82977	2.52401	2.50925	1.74112	1.96304	2.00189	1.17594	0.82645	1.55269	0.958147	1.55967	1.34112	0.867602	1.00059	1.15492	1.07162	1.25362	0.854496	0.908188	0.918855	1.27284	1.04877	1.29164
460	0.847128	1.0411	0.969591	0.958916	1.3446	1.39605	1.40269	0.781375	0.87592	0.804745	1.76505	1.14061	0.942146	1.10109	1.14747	1.21349	1.75555	1.70183	2.15303	1.21994	1.81007	0.961095	4.45784	1.88276	3.6791	4.45453	2.45574	2.45666	1.68146	1.93924	2.01922	1.05901	0.761822	1.52386	0.889725	1.49565	1.17739	0.86723	0.974969	1.14804	1.06112	1.27197	0.815824	0.904218	0.913629	1.19619	0.999289	1.29962
470	0.801524	0.99	0.871176	0.997966	1.26907	1.24211	1.38297	0.748636	0.820172	0.721534	1.62618	1.0986	0.984899	1.03773	1.11795	1.1281	1.81313	1.60633	1.98711	1.1319	1.67071	1.07121	4.26199	1.81345	3.52809	4.05052	2.76352	2.13081	1.57282	1.8365	1.76427	0.921703	0.722146	1.51371	0.968692	1.46085	1.22053	0.843073	0.962359	1.1092	1.03124	1.23603	0.840529	0.903542	0.892983	1.16596	1.00867	1.31559
480	0.781182	0.989118	0.877321	0.860316	1.23268	1.25118	1.33667	0.753936	0.740765	0.689685	1.59801	1.01143	0.921749	1.04644	1.11994	1.12837	1.86763	1.52689	1.88907	1.09782	1.53936	1.05189	4.05673	1.72963	3.2869	3.79644	2.62171	1.94711	1.48805	1.76743	1.67462	0.850119	0.700437	1.45577	0.921124	1.41426	1.40851	0.847905	0.942944	1.12412	1.03831	1.11433	0.790347	0.864217	0.843329	1.19079	0.931608	1.23841
490	0.788072	0.962686	0.869452	0.857631	1.20701	1.19917	1.38768	0.740217	0.745116	0.682957	1.53284	0.987872	0.872328	0.912194	1.09319	1.06348	1.77014	1.45456	1.73284	1.10887	1.49108	1.05769	3.84614	1.66671	2.98207	3.47862	2.36399	1.8122	1.47938	1.77253	1.60889	0.847516	0.688709	1.36269	0.945025	1.35794	1.05905	0.822447	0.928332	1.04748	0.956888	1.14085	0.788312	0.89087	0.877564	1.14976	0.973695	1.23708
500	0.743452	0.927266	0.823101	0.881549	1.09715	1.0461	1.31952	0.733981	0.747836	0.661649	1.4379	1.00436	0.94293	0.919368	1.08458	1.02197	1.73329	1.43355	1.65419	1.08362	1.37895	1.0997	3.7558	1.61138	2.79975	3.26448	1.91749	1.95702	1.4706	1.72108	1.47908	0.800443	0.664255	1.34979	0.836768	1.31274	0.886687	0.815014	0.903713	1.02757	0.947057	1.14298	0.77603	0.852812	0.86502	1.10982	0.933314	1.18785
510	0.772324	0.931319	0.814585	0.793687	1.1079	1.06778	1.22821	0.749883	0.732063	0.642136	1.40236	0.928584	0.934693	0.972142	1.08412	1.00725	1.7924	1.45611	1.58128	1.06374	1.34462	1.08908	3.60421	1.52162	2.61546	3.12466	1.9412	1.90404	1.41589	1.65402	1.47908	0.813459	0.620337	1.28526	0.871916	1.28623	1.03193	0.843445	0.907916	0.989483	0.977315	1.0705	0.7608	0.868737	0.855612	1.08283	0.977392	1.20559
520	0.769699	0.919952	0.8217	0.832249	1.06274	1.00949	1.15876	0.744271	0.716291	0.647071	1.34485	0.972952	0.903707	0.965823	1.07889	0.989389	1.79701	1.38749	1.44948	1.04323	1.32243	1.01229	3.54473	1.4753	2.49886	2.98766	1.59046	1.78857	1.42928	1.63409	1.44882	0.82886	0.627573	1.23749	0.804431	1.26687	1.33845	0.816501	0.855275	1.01381	0.902291	1.05536	0.759606	0.879677	0.884882	1.08283	1.03	1.18563
530	0.778229	0.915371	0.807687	0.800277	1.12091	1.07399	1.25393	0.75456	0.710308	0.634286	1.32592	0.909737	0.860561	0.973679	1.09473	0.95944	1.80238	1.36493	1.37658	1.04228	1.27346	1.03161	3.46988	1.39656	2.37148	2.77536	1.75346	1.57629	1.38819	1.59577	1.39849	0.796756	0.598129	1.20289	0.86887	1.23303	0.810058	0.787884	0.807837	0.991548	0.922049	1.06206	0.757361	0.86654	0.864759	1.07203	1.00981	1.16611
540	0.769371	0.897308	0.78753	0.850065	1.09885	1.04532	1.27151	0.765473	0.724177	0.62666	1.20858	0.920731	0.906844	0.935764	1.10165	0.960753	1.78472	1.30218	1.33743	1.05175	1.24691	0.956265	3.28711	1.32978	2.22067	2.60532	1.4789	1.72416	1.31839	1.57074	1.33056	0.772027	0.583656	1.17296	0.8602	1.19793	1.15993	0.826535	0.830455	0.995679	0.917086	1.11847	0.780592	0.870722	0.848556	1.06232	1.05389	1.11954
550	0.757232	0.88559	0.744521	0.724374	1.08014	1.04189	1.31995	0.72338	0.718194	0.646846	1.18561	0.916805	0.887625	0.95865	1.06612	0.894286	1.70489	1.25304	1.30152	1.04292	1.19519	0.959163	3.18244	1.29709	2.1024	2.47571	1.49814	1.67995	1.29599	1.5301	1.28518	0.822353	0.613849	1.16061	0.818491	1.16108	0.882168	0.791601	0.806436	1.00646	0.897327	1.04529	0.758203	0.852305	0.838103	1.03749	1.00185	1.13861
560	0.766746	0.865589	0.736975	0.732672	1.04981	1.00103	1.26036	0.743335	0.712484	0.596606	1.14081	0.848486	0.892332	0.887771	1.0772	0.905845	1.70566	1.21008	1.27314	1.05901	1.18215	1.06686	3.05475	1.21345	1.98145	2.29061	1.29757	1.57209	1.25434	1.47062	1.24448	0.769207	0.628821	1.14304	0.770689	1.10518	0.985505	0.7903	0.792225	0.965734	0.917563	0.94826	0.726129	0.859064	0.837319	1.00618	1.03114	1.12752
570	0.745092	0.87017	0.691702	0.659941	1.02406	0.979515	1.26636	0.728992	0.695895	0.5984	1.11596	0.825321	0.842518	0.880769	1.07258	0.900591	1.67956	1.1155	1.24118	1.05869	1.14233	1.0461	2.9427	1.14895	1.85178	2.16498	1.23205	1.5416	1.22439	1.43137	1.22715	0.772244	0.608609	1.10926	0.792715	1.09183	0.775132	0.777478	0.777213	0.986099	0.914318	1.00494	0.762414	0.859571	0.822423	1.01373	1.02062	1.10978
580	0.744764	0.862153	0.730076	0.696062	1.00313	0.945681	1.27665	0.73554	0.688825	0.575074	1.04747	0.814719	0.850363	0.868814	1.04121	0.844107	1.66037	1.05708	1.26812	1.10634	1.16568	1.00987	2.84792	1.15385	1.75663	2.07851	1.34362	1.36667	1.17857	1.39074	1.20268	0.747514	0.615845	1.09801	0.832316	1.06022	0.961879	0.775249	0.770007	0.966308	0.914986	0.88673	0.725427	0.853784	0.832092	1.00942	0.948671	1.19406
590	0.751326	0.845059	0.66691	0.662382	0.984255	0.943556	1.23378	0.717144	0.640963	0.591896	1.01799	0.814719	0.834673	0.868643	1.0243	0.832022	1.6857	0.969297	1.22251	1.08899	1.12563	1.00456	2.68822	1.12955	1.66636	1.96395	1.14488	1.32894	1.13095	1.37529	1.15922	0.719965	0.580661	1.06506	0.806306	1.06701	0.774722	0.800706	0.785219	0.974224	0.896659	0.921361	0.74185	0.855727	0.850908	1.00618	0.959477	1.13329
600	0.717533	0.823384	0.7221	0.801985	0.906353	0.931194	1.36325	0.714338	0.648034	0.612082	0.974063	0.827284	0.869582	0.855321	1.00938	0.802073	1.68033	0.938389	1.17941	1.08488	1.10847	0.992487	2.51225	1.07248	1.57981	1.85688	1.14431	1.29845	1.07388	1.28521	1.09734	0.724738	0.623331	1.08345	0.802791	1.02487	0.842723	0.788999	0.779815	0.962866	0.873274	0.872845	0.714267	0.831312	0.797334	0.950039	0.972558	1.15591
610	0.701456	0.811489	0.695799	0.806134	0.87214	0.905559	1.2908	0.680975	0.669789	0.582251	0.930713	0.793517	0.815846	0.787005	1.00846	0.797869	1.66651	0.899444	1.13416	1.0284	1.09565	0.939844	2.36218	1.05115	1.50498	1.77798	1.1088	1.27216	1.07804	1.30328	1.01401	0.705648	0.634311	1.03183	0.838174	1.01411	0.738564	0.760754	0.731577	0.926267	0.826026	0.975213	0.751746	0.846772	0.810401	0.958676	0.811602	1.07297
620	0.68702	0.804529	0.686097	0.759518	0.830432	0.852944	1.27065	0.691264	0.635524	0.600867	0.906004	0.799407	0.846048	0.811428	0.998616	0.803386	1.65346	0.882444	1.12231	1.01546	1.06545	0.84132	2.22879	1.03332	1.47761	1.72503	0.986694	1.38763	1.00036	1.21599	0.980183	0.696104	0.581659	1.02579	0.825755	0.986943	0.870868	0.743473	0.712562	0.848653	0.826885	1.00271	0.744376	0.829032	0.779564	0.955437	0.81729	1.11776
630	0.681115	0.795542	0.716602	0.767572	0.863247	0.865479	1.30409	0.699371	0.621656	0.622175	0.902391	0.78802	0.818984	0.78376	1.02014	0.804174	1.64578	0.859571	1.12518	1.01104	1.06362	0.987658	2.13306	1.01287	1.45211	1.61825	1.03732	1.2268	1.01984	1.22773	0.961756	0.70131	0.619089	1.03019	0.8206	0.966505	0.795266	0.76094	0.725773	0.918121	0.801304	0.937478	0.74585	0.770023	0.699072	0.941402	0.768662	1.1018
640	0.712611	0.808934	0.682648	0.796616	0.844063	0.83928	1.27108	0.707478	0.663262	0.59369	0.881439	0.75975	0.818592	0.79247	1.0346	0.792352	1.62736	0.82279	1.11045	0.994636	1.06751	1.00021	2.02803	0.960083	1.40102	1.52643	0.919341	1.27216	1.00554	1.20826	0.979083	0.691765	0.604367	1.02305	0.805369	0.974981	0.782939	0.740314	0.701353	0.994531	0.818295	1.0338	0.759396	0.796465	0.725206	0.94788	0.785156	1.10268
650	0.711299	0.822415	0.679953	0.801497	0.83218	0.864482	1.28008	0.745206	0.646402	0.636305	0.86829	0.802548	0.788782	0.864202	1.04982	0.798395	1.64885	0.82619	1.12159	1.01862	1.03089	1.01036	1.9391	0.971532	1.39262	1.47464	0.785208	1.25996	1.01522	1.25631	0.974683	0.703262	0.56544	1.02058	0.807243	0.943303	0.85053	0.739942	0.708559	0.996023	0.827458	1.0179	0.755115	0.799675	0.741147	0.905776	0.791128	1.12264
660	0.71294	0.834927	0.699356	0.804182	0.834704	0.844138	1.22864	0.764226	0.671149	0.601316	0.864388	0.778597	0.807217	0.81621	1.02599	0.775538	1.62813	0.803318	1.12338	1.01578	1.07346	0.922941	1.85938	0.958247	1.3892	1.43247	0.858746	1.15859	0.994959	1.20517	1.02061	0.729944	0.55446	1.02525	0.813101	0.916374	0.877032	0.747747	0.707959	0.974282	0.84483	1.07676	0.7535	0.816867	0.77094	0.892821	0.75814	1.09869
670	0.712283	0.817745	0.665293	0.780996	0.803442	0.819978	1.2655	0.716832	0.649393	0.616567	0.859331	0.791161	0.797019	0.807329	1.03106	0.768182	1.63811	0.81939	1.10219	0.940991	1.00755	0.953367	1.78406	0.955276	1.39086	1.38914	0.845116	1.13343	0.989668	1.1823	1.01649	0.719965	0.540487	1.0236	0.786623	0.917215	0.657209	0.726749	0.686742	0.953343	0.826885	0.954794	0.733007	0.822696	0.777996	0.910094	0.809327	1.13684
680	0.688333	0.816864	0.6474	0.75659	0.801734	0.806705	1.19991	0.743335	0.671693	0.628455	0.846326	0.802155	0.8182	0.825603	1.06213	0.781055	1.55444	0.800227	1.08998	0.962449	1.00709	0.921009	1.70381	0.936572	1.33779	1.37466	0.737214	1.08999	0.984264	1.14924	0.996409	0.72387	0.518029	1.00163	0.792247	0.912587	0.815194	0.752392	0.737782	0.969004	0.792619	1.01464	0.74185	0.81598	0.746374	0.944641	0.768946	1.13329
690	0.732625	0.838539	0.667557	0.761715	0.795054	0.830518	1.21963	0.757055	0.630358	0.614997	0.826241	0.767603	0.771132	0.826628	1.05936	0.760301	1.5813	0.801463	1.09142	0.990533	1.01396	0.966407	1.61656	0.924686	1.24637	1.31918	0.808919	1.09418	0.982463	1.16871	0.980458	0.709987	0.502308	0.9901	0.788029	0.898822	0.878881	0.786584	0.754795	0.963153	0.886255	0.969278	0.737709	0.812558	0.751339	0.931686	0.904877	1.16478
700	0.755263	0.833253	0.646753	0.799788	0.745812	0.759252	1.21749	0.753625	0.673868	0.627782	0.840402	0.789198	0.826437	0.812111	1.05659	0.745851	1.56058	0.809499	1.10902	0.970969	1.03982	0.86257	1.55724	0.927832	1.19693	1.28119	0.744774	1.06559	0.978748	1.15666	0.976333	0.726256	0.498316	0.984334	0.750068	0.896658	0.962701	0.758525	0.728375	0.961202	0.846262	0.913139	0.716373	0.823836	0.753953	0.861513	0.839755	1.12264
710	0.740171	0.8292	0.6806	0.77221	0.779676	0.815857	1.21878	0.757055	0.665166	0.630473	0.830142	0.827676	0.791528	0.843195	1.06489	0.755834	1.5245	0.830517	1.11872	0.974755	1.0286	1.0886	1.45984	0.914548	1.11287	1.23931	0.882114	1.04768	0.984039	1.13641	0.94388	0.714542	0.496818	0.986256	0.710233	0.896658	0.81129	0.754994	0.716966	0.964816	0.812663	1.01807	0.736937	0.811502	0.744806	0.923049	0.845727	1.11954
720	0.756575	0.837658	0.69181	0.761227	0.804452	0.777383	1.16476	0.787923	0.669517	0.630025	0.845459	0.808045	0.773877	0.855321	1.07873	0.746902	1.56288	0.794972	1.12302	1.00978	1.03936	1.1509	1.43484	0.894883	1.07753	1.20939	0.716481	1.13	0.984377	1.15403	0.931779	0.677882	0.473113	0.986531	0.820131	0.889625	0.849091	0.787884	0.751393	0.956728	0.866402	0.966664	0.745289	0.786159	0.714491	0.923049	0.790843	1.09204
730	0.748045	0.843826	0.657317	0.79027	0.804685	0.792434	1.19648	0.777633	0.669245	0.620156	0.814826	0.78056	0.80604	0.864373	1.0735	0.767919	1.53064	0.798063	1.09609	0.989902	1.00114	1.04416	1.38175	0.87382	1.06001	1.18966	0.658521	1.08732	0.969517	1.17211	0.88475	0.681136	0.492327	0.990924	0.780999	0.871171	0.908464	0.778036	0.738983	0.936536	0.845402	0.904536	0.719461	0.813065	0.757873	0.928447	0.794824	1.11599
740	0.693582	0.851403	0.691271	0.79027	0.780919	0.78094	1.16133	0.788858	0.67414	0.634286	0.824796	0.793517	0.842126	0.858395	1.08535	0.762665	1.53678	0.823717	1.08244	0.947618	1.0238	1.04465	1.31176	0.839472	0.995336	1.14458	0.609038	1.02863	0.951729	1.14831	0.900701	0.707601	0.462633	0.980765	0.774907	0.860832	0.801224	0.775249	0.741985	0.919269	0.846452	0.947007	0.729848	0.783329	0.726774	0.942482	0.842884	1.08494
750	0.765762	0.863827	0.71574	0.708998	0.761618	0.773696	1.19777	0.775451	0.679579	0.675779	0.818293	0.824535	0.839773	0.805109	1.08196	0.756097	1.52296	0.84999	1.10579	0.956769	1.01556	1.07073	1.28016	0.855291	0.970046	1.11834	0.629656	0.969934	0.964225	1.17597	0.861648	0.679835	0.482096	0.94864	0.744679	0.845985	1.05987	0.779522	0.744788	0.953286	0.786605	0.929202	0.740587	0.804659	0.721547	0.925208	0.836912	1.11377
760	0.74542	0.866558	0.688361	0.744875	0.729968	0.733443	1.19691	0.767344	0.678219	0.623969	0.805289	0.789983	0.78486	0.80545	1.04475	0.726936	1.53448	0.825881	1.08927	0.950142	1.02334	1.04948	1.23586	0.859224	0.942164	1.10192	0.583036	1.12238	0.951729	1.14939	0.64658	0.669422	0.397505	0.938756	0.683989	0.830778	1.02413	0.764471	0.727574	0.944108	0.831467	0.986593	0.725286	0.822062	0.756305	0.906855	0.946964	1.09958
770	0.765434	0.855104	0.689331	0.678978	0.749463	0.772568	1.19263	0.756119	0.65456	0.617913	0.796041	0.802548	0.843695	0.81399	1.04583	0.759775	1.56135	0.823099	1.07418	0.909435	1.00389	1.08135	1.2109	0.859224	0.934909	1.07151	0.573872	1.06826	0.967603	1.14862	0.636679	0.680485	0.381784	0.950013	0.757567	0.828013	0.873539	0.738456	0.702754	0.946173	0.87022	1.07791	0.728655	0.791903	0.738273	0.864751	0.924783	1.06143
780	0.694238	0.851139	0.656454	0.734136	0.703444	0.720257	1.14933	0.735852	0.61105	0.598849	0.779568	0.779382	0.776231	0.785809	0.993849	0.740597	1.52911	0.819699	1.07706	0.912591	1.01442	1.04272	1.20029	0.869187	0.956468	1.0686	0.427941	1.09189	0.989443	1.20378	0.836896	0.693718	0.446912	0.94562	0.734837	0.851335	0.826493	0.735297	0.707558	0.930398	0.807318	1.0582	0.723391	0.798028	0.729387	0.858274	0.904308	1.05212
790	0.704081	0.841535	0.633171	0.686544	0.691173	0.709109	1.17119	0.748636	0.655376	0.575747	0.771621	0.753076	0.790351	0.718005	0.990466	0.736919	1.51913	0.803936	1.05299	0.955822	0.994966	0.95385	1.19124	0.86438	0.950767	1.08696	0.474447	1.02786	0.982913	1.22433	0.604501	0.652069	0.364566	0.947542	0.758035	0.840155	0.961879	0.735668	0.690345	0.878712	0.799395	1.04262	0.721426	0.787975	0.699334	0.8939	0.910849	1.06764
800	0.677834	0.844178	0.643627	0.707289	0.698396	0.695402	1.13604	0.729616	0.649393	0.591447	0.762806	0.762106	0.770347	0.767193	0.99308	0.725097	1.53601	0.811663	1.05479	0.951089	0.989245	0.961578	1.18125	0.872072	0.957608	1.08473	0.469407	1.03701	0.97751	1.18709	0.681233	0.679184	0.391516	0.934088	0.705781	0.833242	0.863472	0.75741	0.710961	0.87527	0.84922	1.05389	0.749079	0.799253	0.712923	0.86799	0.881843	1.10534
810	0.712611	0.842768	0.611505	0.69533	0.680493	0.715963	1.19048	0.736787	0.623015	0.581354	0.775666	0.768388	0.801726	0.780173	0.995694	0.7138	1.45695	0.820317	1.03719	0.971915	0.989016	1.05576	1.13547	0.863069	0.923093	1.0512	0.512934	1.04692	0.979986	1.14723	0.727437	0.665952	0.40524	0.937383	0.711639	0.828493	0.846215	0.774134	0.738182	0.877737	0.800636	1.05324	0.73041	0.799591	0.72416	0.898219	0.698137	0.954979
820	0.746733	0.848055	0.6308	0.699967	0.680532	0.704685	1.07817	0.762043	0.669517	0.605802	0.803121	0.783309	0.831536	0.778465	1.02337	0.741911	1.44697	0.828354	1.03611	0.906911	0.950801	0.965924	1.11968	0.867177	0.9233	1.03673	0.499647	0.974889	0.971881	1.17906	0.816819	0.659444	0.4267	0.921183	0.692894	0.821701	0.862651	0.755366	0.724371	0.936306	0.856666	1.0472	0.733358	0.780583	0.700379	0.888502	0.664581	0.939454
830	0.735578	0.861183	0.580245	0.681175	0.67894	0.742422	1.19091	0.760173	0.677131	0.614549	0.789249	0.826499	0.800549	0.786492	1.01722	0.75347	1.44083	0.849681	1.06125	0.853266	0.904577	1.03016	1.07652	0.857214	0.880286	0.998834	0.4851	0.990515	0.954093	1.1188	0.818744	0.671809	0.417218	0.93299	0.738118	0.828253	0.819508	0.758153	0.73458	0.920015	0.853802	1.00467	0.763677	0.780752	0.681563	0.917651	0.691597	1.01131
840	0.724423	0.875193	0.616571	0.690449	0.67428	0.719216	1.16562	0.77701	0.661903	0.627109	0.765552	0.797836	0.827613	0.80101	1.04183	0.740597	1.46616	0.832063	1.04222	0.834017	0.906865	1.03064	1.13385	0.886143	0.947761	1.03887	0.459785	0.998899	0.95263	1.13533	0.894376	0.671375	0.393762	0.91981	0.762019	0.761832	1.21046	0.777478	0.732178	0.897069	0.859338	1.00799	0.751886	0.777077	0.698288	0.8939	0.738803	0.995786
850	0.718517	0.873078	0.590701	0.663846	0.715211	0.737347	1.14847	0.782934	0.638788	0.632716	0.795752	0.806867	0.774662	0.795203	1.01445	0.727987	1.44006	0.816299	1.07131	0.880719	0.913043	1.06831	1.14133	0.887541	0.987873	1.0514	0.341345	1.01071	0.95263	1.165	0.858073	0.648815	0.380536	0.940952	0.729682	0.808357	0.920996	0.751278	0.691546	0.919384	0.844448	1.04241	0.75722	0.768122	0.684699	0.889582	0.809043	1.02595
860	0.717861	0.883916	0.586821	0.709242	0.685386	0.714401	1.12489	0.776386	0.661359	0.626436	0.759483	0.79548	0.822122	0.772317	1.01876	0.7293	1.45925	0.831135	1.0986	0.913222	0.974371	1.063	1.136	0.880112	0.988184	1.05286	0.441114	0.987084	0.944299	1.18648	0.873749	0.69567	0.356581	0.89153	0.653996	0.809439	0.91093	0.769302	0.706557	0.863224	0.82049	1.0222	0.749921	0.777584	0.70247	0.883104	0.810181	1.05788
870	0.751982	0.870347	0.620667	0.650911	0.689386	0.743897	1.11203	0.791353	0.679035	0.635408	0.768153	0.808045	0.760541	0.778124	1.01953	0.760038	1.43776	0.821863	1.10686	0.899653	0.995195	1.08473	1.14018	0.87985	0.999793	1.0548	0.339054	1.01262	0.967828	1.21382	0.925728	0.669639	0.3466	0.925576	0.71656	0.827712	0.887509	0.790672	0.719167	0.895807	0.822017	1.03277	0.766906	0.777331	0.689926	0.853955	0.898621	1.04768
880	0.73	0.875986	0.605037	0.694354	0.671056	0.730797	1.12661	0.778257	0.677403	0.641239	0.780579	0.830425	0.826437	0.798277	1.02384	0.768182	1.42087	0.86328	1.11836	0.925529	1.00458	1.00263	1.13192	0.889202	0.990361	1.04372	0.454974	0.979843	0.940584	1.18308	0.922428	0.684607	0.327137	0.90718	0.672507	0.785034	1.10035	0.779151	0.717966	0.939748	0.855138	1.02389	0.773292	0.775726	0.69463	0.909015	0.936442	1.02063
890	0.780854	0.881096	0.616248	0.67727	0.669969	0.747757	1.16519	0.784805	0.671964	0.658061	0.782458	0.830818	0.804471	0.796227	0.995848	0.746639	1.4178	0.841026	1.10148	0.937835	1.00549	1.02774	1.12726	0.890513	0.987562	1.0479	0.355091	0.953546	0.9631	1.21012	0.913352	0.669639	0.321896	0.898943	0.636187	0.821461	0.980163	0.773204	0.727574	0.927415	0.845498	1.00963	0.778977	0.780625	0.71632	0.882025	0.785156	0.983367
900	1.03873	1.02921	1.80229	0.726326	0.677658	0.768578	2.6459	2.33914	7.40793	7.53293	2.74922	11.8537	8.88763	10.5691	7.06905	12.07	6.79961	13.8354	8.08276	14.9921	17.2682	19.9381	0.971224	0.730659	0.928379	0.920812	0.42336	0.899428	0.77048	1.06982	0.733762	0.647513	0.443169	2.25724	3.35152	out of focus	out of focus	4.41828	3.11706	1.04834	3.93245	1.95511	2.29896	4.19614	5.96942	11.4814	4.89066	8.55533
910	3.93741	1.58941	3.56199	0.885698	0.71525	0.844312	10.9	10.7098	11.5844	12.6445	15.6958	14.2967	13.0618	13.8216	9.02399	13.3875	7.97637	15.31	15.421	12.8148	16.8483	20.1246	1.118	0.797258	0.960717	0.983094	0.458525	0.906288	0.791194	1.10629	0.729637	0.850553	2.3456	4.79207	4.83573	1.4008	2.77306	8.17374	5.48052	1.10272	6.31565	3.41629	4.94365	6.4826	6.67189	11.0777	8.36059	12.8609
920	6.91843	2.63465	5.57232	4.3377	0.7942	0.930934	16.115	14.0782	12.955	12.6974	15.237	13.5365	12.688	13.8949	8.84407	13.2078	7.18879	15.2083	15.7313	11.3449	16.8153	20.2545	1.19479	0.839472	0.990464	1.00534	0.409041	0.87275	0.78928	1.07291	0.737888	0.939057	3.50468	6.91395	6.38905	1.71565	4.20889	9.02648	6.37903	1.20936	7.95787	5.66467	8.02321	7.59903	6.59898	11.5462	9.9946	13.057
930	7.88302	3.80246	6.59117	7.04312	0.875907	1.07746	16.8648	14.4654	13.5478	12.6384	15.2735	12.5793	11.1269	13.7642	8.42242	13.1203	6.70058	15.0414	15.5625	11.165	16.8238	19.6532	1.23052	0.853543	1.00808	0.991838	0.361963	0.870464	0.745488	1.076	0.730737	0.927777	3.6544	8.70168	7.06226	2.12999	4.22286	9.04952	6.44689	1.3113	8.46806	8.05947	9.70195	7.80106	6.10114	10.051	8.46779	9.9796
940	8.39615	4.82629	6.30617	7.83729	0.895868	1.10097	16.9771	14.5187	13.3724	12.3287	14.6988	11.8494	11.2242	12.9601	8.14901	12.8857	6.85411	14.7379	16.0696	13.3421	18.2998	19.2914	1.21734	0.859049	1.02664	0.970171	0.278231	0.809485	0.747852	1.07168	0.709835	0.85706	3.43406	10.6053	8.17178	2.51644	5.25582	9.24761	6.65365	1.46245	9.04209	8.72649	10.385	7.61246	5.47864	7.47832	6.48656	7.31515
950	8.301	5.38861	5.4075	7.22397	1.0302	1.31793	16.4734	13.8427	13.0531	12.4971	14.4088	11.582	9.57992	13.336	8.30663	12.8652	7.24022	14.7048	15.4731	10.2509	17.9183	19.0379	1.204	0.882647	1.03483	0.958803	0.364827	0.835401	0.765189	1.10242	0.726887	0.796105	3.26138	11.4032	8.79227	2.86465	5.78853	8.9384	6.49532	1.55257	8.53688	8.9437	10.3012	7.47527	4.87469	4.93157	5.28537	5.75028
960	8.29805	5.71074	4.60995	6.35926	1.15648	1.42512	12.1368	11.5538	13.0004	11.6322	14.4971	10.4025	9.01824	12.9427	8.19007	12.6737	7.17421	14.4848	14.8335	8.07289	16.9767	18.0411	1.17968	0.904759	1.02488	0.953556	0.462992	0.844548	0.779036	1.11942	0.726337	0.845129	3.12789	11.7261	9.14938	3.12048	5.76799	8.36904	6.05818	1.61126	8.28002	8.42767	9.8327	6.9618	3.09447	3.10274	4.37281	4.66977
970	7.71175	5.72968	3.93765	4.91832	1.22503	1.54995	8.49071	7.27932	11.9346	11.4454	14.111	9.94311	7.97568	12.2495	8.10057	12.5266	7.29165	14.2922	14.0667	6.78258	16.2037	15.8098	1.16592	0.917607	1.02871	0.944131	0.27972	0.817489	0.79322	1.1137	0.737612	0.822786	2.99913	9.18794	5.33366	3.30051	5.84647	7.92474	5.87123	1.75209	7.98336	7.55989	8.85174	6.4404	2.27519	1.96053	3.59676	3.80483
980	7.28294	5.69955	3.48223	4.34868	1.3726	1.63462	6.0896	4.94673	11.7543	10.8383	14.1048	9.42287	7.92469	11.5795	7.84976	12.1821	7.2763	14.294	13.3115	5.68602	14.74	14.1406	1.13778	0.907556	1.02446	0.929557	0.415456	0.861698	0.777572	1.12992	0.781616	0.79502	2.72464	6.13802	3.76182	3.46978	6.19942	7.22661	5.4529	1.83142	7.51508	8.02854	8.93617	5.78235	1.51836	1.5708	3.01493	3.26015
990	6.79474	5.70237	3.21393	4.02725	1.4004	1.76878	11.4105	8.52092	11.0764	11.7946	13.8468	12.0637	10.4601	10.5489	7.73474	12.0844	7.37609	14.091	12.3324	5.14169	13.7822	11.7268	1.09211	0.893047	1.0312	0.909444	0.546152	0.802625	0.77048	1.09053	0.733487	0.739488	2.59164	4.17182	2.51335	3.50536	5.98822	6.59946	5.17909	1.87806	7.17471	7.82169	8.42207	5.53846	1.33908	1.56325	2.49964	2.87248
1000	6.50143	5.74016	3.08393	4.05727	1.58665	1.87783	6.37682	4.86972	10.1872	12.5408	13.4143	13.2106	11.5458	9.40699	7.33584	11.5062	6.91322	13.7352	11.3761	4.68129	12.5664	9.45398	1.07971	0.901001	1.01638	0.9178	0.519692	0.777091	0.779373	1.14723	0.716161	0.735584	2.60187	2.94175	1.77289	3.41346	6.19058	5.82756	4.70051	1.90537	6.34543	7.86002	7.99942	5.22133	1.24082	1.55677	2.27414	2.54779
1010	11.6367	5.81224	2.97959	3.5938	1.67403	2.0879	4.6479	3.32287	8.88837	12.3594	13.4295	12.591	10.9523	7.41096	6.51053	10.4377	6.26611	12.7502	10.5996	4.65541	11.668	8.29439	1.03196	0.876878	1.0312	0.906821	0.4158	0.788905	0.769467	1.09964	0.783816	0.762265	2.59838	2.51204	1.62222	3.47272	5.72628	5.11958	4.28358	1.83865	5.70869	7.42779	7.16913	4.9733	1.24004	1.81047	1.85269	2.30251
1020	12.3883	5.84907	2.88603	3.79857	1.88113	2.22679	5.49714	3.91186	8.74723	12.245	13.2785	12.3339	10.5221	6.01167	6.10211	9.73101	6.13561	12.1193	10.1514	4.80246	11.3723	7.06815	1.02787	0.879326	1.00985	0.92363	0.530001	0.763371	0.787929	1.09763	0.806918	0.72951	2.62308	3.11582	2.36291	3.34379	5.80291	4.28672	3.74315	1.80509	5.22685	7.04026	6.37738	4.62533	1.20423	2.31464	1.75174	2.09492
1030	11.7315	5.88123	2.87126	3.55329	2.01406	2.52504	8.64204	5.92454	7.67171	12.0268	13.021	11.7206	9.31947	6.5459	6.21529	9.61436	6.44343	11.9855	9.78723	5.12528	11.3485	6.82474	1.01956	0.899165	1.03317	0.931112	0.3402	0.833496	0.772056	1.1188	0.806918	0.727774	2.62707	3.85634	2.63707	3.3367	5.04072	4.19716	3.75016	1.77297	4.40856	6.57814	5.64052	4.45118	1.16817	3.33701	1.63458	1.94056
1040	10.0494	5.8533	2.70914	3.66311	2.5937	2.95611	5.42212	4.38923	7.12375	11.1633	13.6012	10.6377	9.13826	7.75169	6.53698	10.0841	6.81726	12.0906	9.71684	5.64342	11.6297	6.42871	1.02207	0.905371	1.03783	0.925865	0.345812	0.790049	0.765189	1.08249	0.816819	0.715627	2.50231	4.31679	2.9916	3.12246	4.76214	3.55254	3.43311	1.66025	3.88902	5.53911	4.35502	4.20434	1.08611	3.83038	1.53818	1.87004
1050	9.56809	5.72748	2.66818	3.28091	2.88154	3.56498	4.30151	3.04693	6.34219	10.596	13.4928	9.70949	8.14826	8.16517	6.56682	9.99451	6.79577	11.8427	9.41947	5.80877	12.0153	6.43112	1.01046	0.919529	1.06654	0.908667	0.576621	0.779378	0.757984	1.07971	0.723861	0.784825	2.5078	4.49499	3.28334	3.00657	4.47884	3.29165	3.11406	1.57064	3.79796	5.78909	4.15625	4.09802	1.75252	4.62064	1.49467	1.85008
1060	9.39125	5.64888	2.47997	3.4603	3.32623	4.09681	3.92041	2.56207	5.60034	10.1975	13.1385	9.14763	7.40145	8.28046	6.21344	9.51374	6.57086	11.2857	7.9014	18.8189	8.53547	6.34178	1.02845	0.931066	1.09619	0.907501	0.330234	0.908575	0.744474	1.05406	0.742838	0.766821	2.40374	4.22152	3.14766	2.82624	4.27073	2.98393	2.85405	1.5255	3.72895	4.88891	3.36907	4.02558	3.10205	4.86679	1.49524	1.85851
1070	9.09006	5.39425	2.4845	3.01806	4.49499	5.40021	3.23707	2.27179	6.02049	10.2533	13.0703	9.08088	7.15709	8.11889	5.33477	8.1999	5.54915	10.3346	7.31636	17.8511	7.83089	6.18675	1.06501	1.00798	1.18532	0.915371	0.333442	0.97184	0.757421	1.08064	0.737337	0.766604	2.38278	4.18912	3.07619	2.63804	4.05481	2.84419	2.74076	1.4083	3.39812	5.12322	3.546	3.97603	3.15249	5.30294	1.60728	2.04524
1080	8.89058	5.21362	2.34319	2.959	4.86469	5.57124	3.10717	2.16328	5.76949	9.6464	12.9728	8.65212	7.15395	7.91292	4.67	7.01111	5.06401	9.36689	7.96927	15.3973	9.92471	5.79072	1.12857	1.10141	1.30815	0.934026	0.481205	0.986703	0.761023	1.06271	0.790142	0.755757	2.31117	4.41619	3.18023	2.56326	3.88943	2.83545	2.75357	1.39809	3.12017	4.68004	3.23824	3.95293	2.22109	5.06436	1.69373	2.09758
1090	8.79019	5.01273	2.26439	2.50944	4.90916	5.77641	3.03515	1.99491	5.56417	9.30212	12.7417	7.99132	6.25887	8.13563	4.85899	7.08519	5.38488	9.20276	8.12298	13.165	10.946	5.41063	1.13134	1.14878	1.41998	0.844539	0.277085	0.984036	0.761811	1.07075	0.771715	0.747081	2.20636	4.20175	3.02417	2.36917	3.78938	2.78844	2.73776	1.35822	3.13143	4.26224	2.90486	3.85417	2.24513	4.86355	1.80748	2.2719
1100	8.54806	4.86982	2.0916	2.31687	5.09284	5.75082	3.06173	1.9313	5.25334	8.86318	12.4907	7.91593	6.60443	7.72897	5.04029	7.23678	5.41328	9.2074	8.13484	10.9672	11.7371	5.75498	1.22911	1.29185	1.58831	0.844539	0.530689	1.021	0.769692	1.09779	0.814069	0.762916	2.17517	4.37775	3.27865	2.3194	3.95352	2.61581	2.57463	1.29971	2.85606	4.11582	2.81636	3.74557	1.67986	4.53967	2.04379	2.45065
1110	8.03295	4.57668	2.04449	2.20241	5.26771	6.05003	2.93441	1.91789	5.09698	8.44377	12.6773	7.1287	5.57796	6.20142	4.5273	6.39057	4.75159	8.54502	7.99118	9.23446	12.2808	5.78927	1.36088	1.48649	1.7698	0.891275	0.416831	1.16773	0.770817	1.10505	0.808018	0.726039	2.12027	4.9807	3.73745	2.18175	3.47854	2.49707	2.531	1.26524	2.6706	3.76576	2.49372	3.64179	1.48648	3.9351	2.213	2.69018
1120	7.86104	4.38372	1.98348	1.9664	5.51136	6.118	2.92626	1.8705	5.02192	7.75924	12.3296	6.73724	5.55089	5.75651	4.41781	6.13784	4.74314	8.42603	7.70459	7.73746	12.0245	5.82839	1.47501	1.68594	1.98746	0.912651	0.478456	1.20356	0.762036	1.08898	0.773641	0.70977	2.07711	5.64956	4.4983	2.21649	3.3524	2.23488	2.20934	1.19301	2.61782	3.50162	2.38585	3.47114	1.34875	4.04198	2.20475	2.71768
1130	8.20684	4.20635	1.90663	1.82411	5.86782	6.88362	2.91898	1.75763	5.36348	7.36696	12.0444	6.12983	4.77976	5.51911	4.41258	6.04536	4.78613	8.27025	7.0937	5.70117	10.7826	5.65887	1.60798	1.88171	2.20046	0.926253	0.47124	1.40745	0.784552	1.11741	0.816544	0.658359	1.90593	6.70473	5.26618	2.22599	3.23612	2.15516	2.11467	1.17076	2.82084	3.09852	2.083	3.29729	1.25127	3.39963	2.21811	2.55844
MAX	12.3883	5.88123	6.59117	7.83729	5.86782	6.88362	16.9771	14.5187	13.5478	12.6974	15.6958	14.2967	13.0618	13.8949	9.02399	13.3875	7.97637	15.31	16.0696	18.8189	18.2998	20.2545	4.79931	2.44526	4.15951	7.53488	3.98801	6.44882	1.79651	2.07598	2.65205	9.96064	3.6544	11.7261	9.14938	3.50536	6.19942	9.24761	6.65365	1.90537	9.04209	8.9437	10.385	7.80106	6.67189	11.5462	9.9946	13.057
[truncated: 2 more columns]

## Sheet: Endogenous
Time [s]	cell 1	cell 2	cell 3	cell 4	cell 5	cell 6	cell 7	cell 8	cell 9	cell 10	cell 11	cell 12	cell 13	cell 14	cell 15	cell 16	cell 17	cell 18	cell 19	cell 20	cell 21	cell 22	cell 23	cell 24	cell 25	cell 26	cell 27	cell 28	cell 29	cell 30	cell 31	cell 32	cell 33	cell 34	cell 35	cell 36	cell 37	cell 38	cell 39	cell 40	cell 41	cell 42	cell 43	cell 44	cell 45	cell 46	cell 47		Average
0	0.966128	1.11303	0.989153	1.01489	1.05934	0.967258	1.07104	0.940957	1.03915	1.04693	1.02743	1.03427	1.05457	1.02102	1.00169	0.878871	1.03695	1.06203	1.0434	1.01336	1.05073	1.05542	1.05275	1.07698	1.07905	1.04247	1.08157	1.06592	0.986613	1.01007	1.08303	1.04241	1.06581	1.05096	1.00801	1.03024	1.03133	1.03846	0.980692	1.06842	1.00299	1.03367	1.01859	0.954164	0.976233	1.01297	0.976544		1.02676
10	0.965518	1.09421	1.01187	1.00305	1.07562	1.02511	1.08651	0.959718	0.995541	1.01808	0.969287	1.07043	1.00599	0.974022	0.961695	1.04796	1.11674	1.04131	1.12495	1.08502	1.09601	1.07986	1.08035	1.07694	1.08509	1.02927	1.11561	1.0569	0.957159	0.963212	0.971424	1.02135	1.01818	0.977327	1.00767	1.02401	1.01731	1.02369	1.009	1.04955	1.03003	1.00769	1.00479	0.975992	0.948088	1.01238	0.975195		1.02653
20	0.996132	1.05829	0.964156	1.007	1.07988	1.04457	1.09694	0.946729	0.97088	0.99836	1.00222	1.05048	0.986166	0.971949	0.971885	0.956564	1.13745	1.0521	1.08878	1.05774	1.04534	1.00894	1.02282	1.04469	1.05986	1.01167	1.09721	1.00961	0.95584	0.983104	0.965055	1.02761	0.996113	1.05473	1.03027	1.02366	1.00453	1.01417	1.01608	1.04375	1.02757	1.0024	1.00407	0.979003	0.937545	1.01725	0.992131		1.0173
30	1.00097	1.07183	0.955701	1.09087	1.08216	1.05971	1.10977	0.962244	0.97685	0.995872	0.979507	1.04015	0.994626	0.995907	0.987458	1.00815	1.14624	1.0366	1.07469	1.04254	1.04977	0.962994	1.04384	1.03548	1.01269	1.00807	1.05775	1.01204	0.98432	0.995923	1.00539	1.02249	1.03773	0.971978	1.0289	0.979337	1.00577	1.01924	1.03175	1.03272	0.991517	1.02043	0.997416	0.980508	0.951662	1.00034	0.980815		1.01772
40	1.00651	1.05531	1.0143	0.985293	1.03273	1.01105	1.08948	0.970542	1.00748	1.01112	0.982232	1.0348	0.991242	0.974943	1.03033	1.04935	1.03181	1.02667	1.02442	1.06393	1.05651	0.978128	1.07919	1.02941	1.0476	1.02747	1.07973	1.01499	1.00724	0.976473	1.06453	1.02932	1.02014	1.011	1.01281	1.03371	0.993405	1.01503	1.009	1.02894	1.00572	1.0162	1.0035	0.983829	0.948892	0.961915	0.962567		1.01683
50	0.949905	0.995051	0.913133	1.03226	1.03838	1.06998	1.14104	1.00085	0.979187	0.988776	1.00154	1.06063	1.02411	1.01088	1.03245	1.01685	0.999096	1.01613	1.05404	1.06755	1.01567	0.996756	1.03559	1.04613	1.0388	1.03647	1.04242	1.01575	1.01815	0.998576	1.04664	1.00882	1.00645	0.961594	0.993968	0.974489	0.999588	1.01069	1.00546	1.0005	1.00818	0.996421	1.01332	1.02766	0.982487	1.02577	1.00217		1.0149
60	1.00935	1.00676	0.946879	1.05199	1.04398	1.13568	1.10264	1.01276	1.0337	1.00265	1.00744	1.04318	1.00889	1.01825	1.01803	1.05235	1.02677	1.01774	1.02819	1.05743	1.06094	0.97983	1.04591	1.01536	1.00114	1.00947	1.03649	0.993538	1.01169	1.00079	1.05574	1.00199	1.0112	0.948379	1.02034	0.964793	1.04555	1.01301	0.987264	0.983665	0.977314	1.00859	1.01112	0.996271	1.00277	1.01492	1.01173		1.01775
70	1.04013	1.02374	1.04077	1.03699	1.05415	1.03944	0.977347	1.0225	1.04772	1.00693	0.947939	1.04371	1.0275	1.01802	1.05379	1.01716	1.00049	1.00372	0.988131	1.04174	1.03108	1.02255	1.01959	1.02068	1.01891	1.05587	1.07155	0.999742	1.0094	0.99946	1.09456	1.08227	0.978654	0.981418	1.0152	1.05518	1.02947	1.03742	0.994088	0.997597	0.994795	0.997943	1.02247	0.997776	1.00366	1.00793	1.006		1.02079
80	1.05958	1.00435	1.05165	1.03719	1.01629	1.00592	0.935545	1.03873	1.03915	1.01421	1.02561	0.986359	1.02339	1.03369	1.03129	1.01793	1.02181	0.999628	0.979942	1.04603	1.01971	0.998189	1.01005	0.994106	1.04671	1.04387	1.01216	1.00765	1.01475	1.01007	1.02207	1.00484	1.02335	1.02295	1.00904	1.10262	1.02267	1.01741	1.00293	0.978441	0.985781	0.977654	1.02194	1.02098	1.03047	1.02017	1.01941		1.0172
90	1.04702	1.01158	1.10502	0.990423	1.02023	1.00456	0.959683	1.016	0.992686	0.976888	1.00244	1.00559	1.01565	1.02217	1.01149	1.00461	1.02181	0.988463	0.965153	1.02709	0.993514	1.00741	0.977927	0.987428	0.976889	0.998867	1.01288	0.984727	1.02662	1.00521	1.04118	1.00598	1.02921	1.01634	1.00253	1.02332	1.0066	1.00398	1.02568	0.976409	1.00791	0.998112	1.00997	1.01163	0.963903	1.0045	1.01769		1.00649
100	1.05357	0.987018	1.11201	1.00779	0.982936	1.00321	0.927646	1.02069	0.985417	0.974538	1.00108	1.00043	0.995834	1.01526	1.00726	1.02301	0.978648	0.993177	0.953393	1.00698	0.968854	1.01574	0.96722	0.98433	1.05346	1.02087	0.991414	0.982581	1.04663	0.958792	1.01146	1.01395	1.01832	0.954672	1.00356	0.976913	1.01649	1.00239	1.01658	0.981633	0.985508	0.988249	0.996984	1.04405	1.00625	1.02284	1.02938		1.00189
110	0.959543	0.974278	1.05973	0.993383	0.957676	0.962121	0.925561	1.04306	1.0189	1.0067	1.02425	0.932749	0.975289	1.02033	1.00111	1.00253	0.974993	0.975437	0.956265	0.974983	0.951323	0.994965	0.967994	0.980489	0.965163	0.954464	0.937647	0.971279	1.04177	0.998576	0.976276	0.975804	1.01916	1.01288	1.01383	0.956828	1.00474	1.0085	1.01456	0.959284	0.993429	1.01057	0.993679	1.01987	1.02868	1.00933	1.0251		0.989895
120	1.01275	0.945012	0.97195	1.00068	0.941442	0.964554	0.928633	1.0427	1.01138	1.0255	1.01948	0.953765	0.971905	1.01203	1.00841	0.985516	0.969076	0.970475	0.951491	0.947459	0.971937	1.00804	0.937938	0.952165	0.972003	0.984866	0.952366	0.971025	1.00717	1.02245	0.948981	0.970111	1.00393	1.00281	0.989173	0.96791	1.01381	0.994704	0.994594	0.97815	0.980045	0.976132	0.999667	1.01102	1.02278	1.00988	1.01499		0.984954
130	0.972452	0.939847	0.972391	0.984503	0.927334	0.939413	0.926219	1.04198	1.00281	1.002	1.01494	0.937023	1.00429	0.99752	0.99534	1.02656	0.926787	0.985858	0.972412	0.926004	0.937452	0.972934	0.937551	0.939726	0.887701	0.932462	0.904017	0.969226	1.01169	1.01891	0.992047	0.999146	0.991085	1.011	0.993968	0.953365	0.980833	0.990616	1.02139	0.986568	0.984416	0.975963	0.978492	1.01823	1.04673	1.02301	1.03297		0.978451
140	1.01392	0.919074	0.956951	0.883468	0.906846	0.92049	0.901204	1.00482	0.962573	0.990435	0.997676	0.968548	0.98254	0.987153	0.980921	0.999298	0.857524	0.96266	0.920828	0.904732	0.902967	0.983323	0.963608	0.953037	0.918171	0.946463	0.912092	0.972363	1.0012	0.989735	0.945038	0.957586	0.941921	0.958762	0.935056	0.928778	0.953421	0.948509	0.98044	0.984536	1.01665	0.99056	0.987882	1.01602	1.02904	0.978354	0.99659		0.959867
150	0.949382	0.905416	0.947982	0.930236	0.87889	0.905081	0.897803	1.00121	0.978668	0.98297	0.991998	0.951272	0.973839	0.969184	0.954389	0.972041	0.942972	0.953604	0.974818	0.918218	0.919728	0.977322	0.954321	0.956005	0.962587	0.982065	0.900746	0.962929	1.01065	1.01139	0.916529	0.947908	0.963849	0.985823	0.98472	0.972065	0.957749	0.948326	0.943537	0.958123	0.993702	0.983966	0.980839	1.00313	1.04423	0.972253	0.990033		0.960947
160	0.997135	0.895202	0.98636	0.94997	0.902127	0.941846	0.922928	0.974511	0.9579	0.958042	1.00494	0.886619	0.96417	0.957665	0.952466	0.972426	0.925656	0.965885	0.968686	0.905958	0.962882	0.972755	0.954708	0.959889	0.996343	0.992466	0.928141	0.980275	0.967232	1.04455	0.953227	0.966695	0.943178	1.0069	0.975815	0.98661	0.95878	0.960714	0.986758	0.97728	1.00244	1.00549	0.978779	0.972981	1.03226	0.932171	0.968638		0.965074
170	0.97376	0.89635	1.01834	0.896097	0.899015	0.966717	0.992268	0.966934	0.973216	0.960899	0.983368	0.919034	0.969005	0.968032	0.955734	0.968807	0.885195	0.948518	0.930415	0.913253	0.965579	0.984845	0.948645	0.947146	0.877841	0.922862	0.866196	1.02945	0.941877	1.01272	0.906824	0.921719	0.931726	1.07047	0.97513	1.04617	0.957955	0.953147	0.980187	1.01443	1.012	1.00995	0.976479	0.986884	1.04432	0.974032	0.998052		0.962587
180	0.981043	0.956145	1.07525	1.00739	0.935477	1.0343	1.03407	0.999767	0.931422	0.945417	0.845515	0.904073	0.868938	0.918041	0.950736	0.910595	1.03025	0.938841	0.948619	0.849623	1.12837	0.802689	0.899755	0.849079	0.823475	0.784452	0.776142	0.997482	0.902421	0.990177	0.905004	0.87105	0.856305	1.07896	0.993625	1.00012	0.908491	0.879673	0.979428	0.916617	0.978406	1.01925	0.969054	0.903555	0.996694	0.885988	0.93439		0.938216
190	1.03446	1.18293	1.10804	1.34661	0.998807	1.42953	1.38483	1.3768	0.918701	0.993706	1.09147	1.10088	1.12515	0.945686	0.948236	0.921606	1.00397	0.951743	0.957818	0.984116	2.30144	0.866273	0.880792	0.890366	0.926077	0.89306	0.962588	1.04599	1.03427	1.50648	1.20768	1.05038	0.975581	1.32849	1.63344	1.07942	1.01484	1.00825	1.41594	0.903846	0.981138	1.01181	0.965796	0.908426	0.962652	0.885522	0.933266		1.09317
200	1.02958	1.48374	1.16965	1.80206	1.07007	1.8472	1.57705	2.27518	0.931941	1.06784	1.98104	1.3383	2.01366	0.995907	0.926511	0.937006	0.966988	0.958566	0.943534	1.10843	3.37067	0.849795	0.876664	0.889362	0.837689	0.834456	1.10355	1.13613	1.18146	2.69072	1.81911	1.96413	1.15324	1.74415	2.46574	1.51749	1.30132	1.13915	2.37464	0.945352	0.953277	1.00465	0.958609	0.879779	0.992495	0.919672	0.948554		1.3463
210	1.04563	1.8681	1.49174	2.31434	1.15405	1.88423	1.71069	3.07362	0.923893	1.09733	3.11521	1.6906	3.05591	1.13252	0.93747	1.0361	0.955502	0.947897	0.920711	1.25709	3.71706	0.84075	0.913945	0.915417	0.828894	0.824655	1.4239	1.16635	1.3379	3.74676	2.69469	3.23712	1.57727	2.15824	3.28914	2.23017	2.01979	1.34291	3.70363	0.952028	0.972943	0.989433	0.958705	0.884251	0.973463	0.901157	0.938699		1.64153
220	1.12417	2.1525	1.72495	2.53299	1.2639	2.25675	2.19585	3.62528	0.948555	1.13189	3.79198	2.03791	3.5502	1.45735	0.986689	1.13135	0.971774	1.016	1.00777	1.49794	3.68739	0.926813	0.97883	1.06987	0.874643	0.859257	1.61321	1.31155	1.50003	4.36694	2.96826	4.10646	2.10242	2.83255	3.85942	3.10735	2.71826	1.56968	4.92292	0.94332	1.00381	0.989715	0.945003	0.87575	0.980254	0.923613	0.936263		1.90169
230	1.19582	2.38962	1.85207	2.60679	1.31753	2.09077	2.22679	3.534	1.03188	1.17889	3.98684	2.39679	3.78344	2.07406	1.02918	1.29852	1.10908	1.16598	1.21531	1.61821	3.32982	1.07073	1.12885	1.24798	1.04875	0.947063	1.83114	1.32299	1.62013	4.81297	3.22757	4.57672	2.46528	3.18434	4.15295	3.47235	3.43013	1.84374	5.4891	0.969733	0.995888	0.995181	0.939733	0.877344	1.01072	0.951703	0.959495		2.06391
240	1.31125	2.43426	1.98338	2.66876	1.34798	2.22729	2.58468	3.37381	1.13339	1.20953	3.71999	2.60179	3.44264	2.87806	1.18164	1.52405	1.22568	1.41273	1.36273	1.63359	3.06242	1.1902	1.35757	1.40693	0.97982	1.03287	1.72646	1.33242	1.7815	4.96857	3.44957	4.58127	2.60635	3.46281	4.39237	3.82939	3.84769	2.06117	5.51639	0.922422	1.03986	0.972582	0.93935	0.942342	1.06004	0.995047	0.963354		2.16336
250	1.28862	2.39329	2.16534	2.99258	1.30897	1.90667	2.45566	3.20351	1.35715	1.22962	3.06661	2.64703	2.75135	3.50123	1.44562	1.80433	1.3991	1.688	1.57003	1.69974	2.72971	1.30948	1.63633	1.5877	1.15295	1.38069	1.81693	1.32453	1.81095	4.58973	3.12748	4.52775	2.55243	3.8061	4.35537	3.76221	4.05379	2.12318	5.35134	0.930259	1.06827	0.991687	0.934703	0.943272	1.15958	1.04496	0.970136		2.1897
260	1.36036	2.40224	2.12961	3.228	1.28392	1.87612	2.80236	2.76731	1.65205	1.20502	2.45047	2.6107	2.18141	3.72814	1.84918	1.9842	1.60593	2.03213	1.82322	1.69538	2.39719	1.41131	1.8702	1.68293	1.29011	1.94593	1.87662	1.35625	1.90313	4.46729	3.02982	4.23114	2.46123	3.91088	4.41566	3.59841	4.19229	2.28568	5.16987	0.907619	1.05653	1.00803	0.943949	0.956378	1.32211	1.18732	1.04433		2.22532
270	1.41369	2.28655	2.07808	2.78656	1.26011	1.73555	2.5725	2.50429	2.15255	1.19884	2.07734	2.53393	1.85317	3.67792	2.35117	2.19148	1.67902	2.24774	1.89724	1.70574	2.1398	1.47561	2.12884	1.81032	1.47764	2.66438	1.76725	1.36695	1.96287	4.0279	2.70076	3.84742	2.36151	4.05531	4.36839	3.16553	3.88809	2.41756	4.88172	0.911392	1.04123	1.01226	0.943374	0.982944	1.66431	1.25943	1.07483		2.20428
280	1.40441	2.12737	2.04168	2.67172	1.23237	1.70041	2.91471	2.2759	2.64604	1.1394	1.74349	2.34229	1.54644	3.73183	2.87932	2.47268	1.76073	2.41025	1.95251	1.62293	1.87683	1.47803	2.20985	1.80137	1.46742	2.74258	1.57109	1.28846	1.85847	3.62829	2.33014	3.52918	2.10815	3.94644	4.16631	2.73577	3.71847	2.46339	4.49551	0.883818	1.06527	1.01874	0.9531	0.976523	1.96542	1.39997	1.15655		2.15854
290	1.41997	2.00766	1.98294	2.23995	1.1904	1.60903	2.77899	1.96598	3.10084	1.18322	1.50208	2.14441	1.34607	3.68783	3.34324	2.59473	1.69756	2.48679	1.86665	1.52252	1.6285	1.43227	2.24958	1.70501	1.57358	2.84479	1.50772	1.32806	1.82915	3.24283	2.08418	3.11529	1.92826	3.99332	3.94436	2.31259	3.46641	2.42714	3.84922	0.898331	1.0721	1.03317	0.951758	1.00601	2.1795	1.52954	1.26619		2.08659
300	1.38295	1.83379	2.03462	2.03393	1.16338	1.54604	2.60937	1.67518	3.4217	1.18834	1.3104	1.90094	1.12321	3.44778	3.69585	2.61798	1.69999	2.52128	1.8212	1.52099	1.5158	1.4294	2.24494	1.62087	1.55288	2.85379	1.42727	1.28075	1.68613	2.99307	1.83488	2.84258	1.71764	3.71076	3.82277	2.00543	3.10841	2.4319	3.44582	0.911973	1.03577	1.07746	0.962346	1.04529	2.42995	1.58492	1.33109		2.00963
310	1.31304	1.69974	1.86626	1.71563	1.16063	1.41628	2.38566	1.52148	3.69791	1.14424	1.16483	1.72461	0.98955	3.17156	3.87946	2.64116	1.59854	2.40491	1.62177	1.46716	1.28789	1.40146	2.18457	1.52092	1.52116	2.70018	1.28059	1.23723	1.6086	2.69646	1.67929	2.59095	1.57923	3.56979	3.58438	1.72215	2.83697	2.26872	3.11066	0.895719	1.09395	1.09939	0.959855	1.03466	2.52859	1.52204	1.3336		1.90284
320	1.3082	1.59817	1.72981	1.51691	1.02676	1.39628	2.45522	1.37139	3.84172	1.15995	1.06672	1.59673	0.939516	2.92898	3.9481	2.54984	1.67102	2.37948	1.6255	1.35621	1.1721	1.34504	2.10214	1.45061	1.46378	2.50617	1.18307	1.22002	1.54907	2.33752	1.46153	2.30914	1.4492	3.47823	3.49396	1.37066	2.40169	2.15961	2.79472	0.914295	1.10378	1.14707	0.991092	1.07446	2.64242	1.6028	1.43121		1.82174
330	1.28792	1.44391	1.66893	1.35569	1.07267	1.34464	2.28033	1.26423	3.79344	1.13475	0.984958	1.46422	0.857578	2.65069	3.66913	2.41208	1.57809	2.29686	1.55431	1.36038	1.12914	1.27232	1.98307	1.31763	1.36251	2.29675	1.12041	1.19696	1.46641	2.13595	1.34447	2.20723	1.30506	3.25104	3.24393	1.27681	2.19868	2.04024	2.46765	0.919229	1.11143	1.1788	1.02305	1.08978	2.69559	1.61309	1.4813		1.72773
340	1.24584	1.33179	1.55453	1.21085	1.00498	1.26003	2.11301	1.1614	3.6909	1.08987	0.960657	1.32369	0.83534	2.55923	3.72162	2.32199	1.59262	2.17479	1.47428	1.26328	1.0332	1.20605	1.79009	1.20372	1.26684	2.06314	1.01922	1.15135	1.4191	2.02279	1.29988	2.04611	1.25925	3.07704	3.0874	1.2446	1.95404	1.99344	2.12846	0.976989	1.16606	1.23967	1.05146	1.15713	2.6804	1.62707	1.53054		1.65076
350	1.25247	1.23836	1.46484	1.06166	1.03454	1.18163	1.98498	1.12352	3.60004	1.06393	0.927273	1.27561	0.802227	2.3899	3.66721	2.1834	1.58052	2.03498	1.31553	1.1815	0.978487	1.19682	1.70444	1.14415	1.19648	1.83852	0.998569	1.13117	1.34172	1.9335	1.24226	1.93282	1.18508	2.82091	2.82229	1.12305	1.66096	1.82727	1.90729	1.14708	1.28051	1.32978	1.11082	1.20915	2.70488	1.59263	1.54935		1.5803
360	1.2417	1.16583	1.33764	0.953325	0.964678	1.14406	1.88557	1.08888	3.46583	1.04066	0.908196	1.19795	0.845492	2.26112	3.43649	2.13211	1.48672	1.91304	1.24601	1.10512	0.926471	1.20506	1.63917	1.103	1.21531	1.78612	0.957375	1.08536	1.29643	1.64926	1.11579	1.7421	1.1038	2.53079	2.66474	1.07699	1.49093	1.71077	1.69068	1.43472	1.43893	1.45281	1.18857	1.273	2.62607	1.50391	1.5347		1.51624
370	1.24732	1.10052	1.27883	0.929644	0.955498	1.13378	1.8576	1.11053	3.33448	1.03974	0.890709	1.13793	0.807302	2.11115	3.36997	1.96672	1.40397	1.78663	1.15022	1.03549	0.924351	1.10181	1.51236	1.01279	1.10481	1.5273	0.91291	1.03515	1.21265	1.57898	1.05483	1.61173	1.02223	2.48548	2.51609	0.979337	1.29864	1.59494	1.48646	1.89332	1.86722	1.55753	1.26978	1.34429	2.47078	1.5034	1.54511		1.46962
380	1.21867	1.03763	1.25162	0.864129	0.943309	1.08053	1.78079	1.02647	3.11512	1.03006	0.884804	1.06936	0.767662	1.85428	3.09619	1.8272	1.34037	1.67262	1.11789	1.00257	0.848446	1.05004	1.42542	0.950943	1.12337	1.4607	0.893182	1.04488	1.09706	1.47068	0.956259	1.48534	0.964408	2.29008	2.3099	0.927739	1.28772	1.50505	1.34643	2.63027	2.57822	1.61992	1.33819	1.39706	2.38304	1.42514	1.52702		1.43229
390	1.19107	0.99333	1.12392	0.844593	0.897925	1.07377	1.73044	1.00626	2.92977	1.01463	0.872086	0.983687	0.773463	1.74554	2.91412	1.65587	1.23508	1.51954	1.00548	0.924716	0.823786	0.972576	1.28339	0.873694	1.1033	1.31669	0.858632	1.00918	1.0219	1.38404	0.895299	1.34358	0.909658	2.1724	2.1383	0.905922	1.10181	1.39405	1.27414	3.07087	3.34849	1.71071	1.42884	1.442	2.25983	1.37125	1.49618		1.39034
400	1.14776	0.952472	1.11304	0.848342	0.887033	1.07134	1.60042	1.01276	2.72937	0.971866	0.858233	0.963739	0.7447	1.62276	2.72166	1.67135	1.24735	1.46371	1.03502	0.913008	0.838235	0.946874	1.20948	0.833455	0.997587	1.15188	0.842482	0.987264	1.03989	1.27087	0.897422	1.32252	0.904071	2.1897	2.06808	0.915618	1.13541	1.3279	1.17759	3.60464	3.90161	1.81683	1.50645	1.49925	2.19684	1.35421	1.48966		1.38302
410	1.11632	0.933535	1.01084	0.809665	0.879409	1.10351	1.61809	0.97884	2.53182	0.962604	0.864137	0.930968	0.765245	1.52323	2.55535	1.53591	1.20471	1.35529	0.952733	0.885055	0.829759	0.980367	1.16588	0.847072	0.893919	1.05147	0.818154	0.984104	1.00717	1.22358	0.895299	1.20011	0.86273	2.03898	1.90984	0.858132	1.07049	1.22056	1.09822	3.81305	4.09254	1.85899	1.55685	1.47805	2.01233	1.28113	1.44784		1.34072
420	1.08222	0.882807	0.985404	0.790721	0.837241	1.07296	1.54864	0.957914	2.40228	0.983984	0.856416	0.863465	0.693942	1.41035	2.35848	1.45013	1.19801	1.27887	0.93057	0.831785	0.83785	0.915798	1.05545	0.798453	0.894808	0.962864	0.78248	0.928561	0.973067	1.13959	0.831609	1.1039	0.829489	1.94427	1.82113	0.903151	1.00577	1.15062	1.06082	3.86471	4.06823	1.89664	1.57443	1.48628	1.95345	1.23206	1.42521		1.29483
430	1.05295	0.856639	0.99158	0.755003	0.839315	1.01538	1.45922	0.947451	2.18059	0.923899	0.840745	0.849573	0.723672	1.32419	2.2237	1.41125	1.14824	1.23335	0.943068	0.820383	0.865785	0.914365	1.05494	0.792256	0.846394	0.912461	0.794848	0.924133	0.951185	1.11174	0.815232	1.07031	0.802533	1.80582	1.69646	0.814498	0.938582	1.08758	0.967549	3.73061	4.07833	1.88277	1.597	1.41889	1.83274	1.17262	1.37301		1.25091
440	1.01135	0.845048	0.929895	0.755003	0.831691	1.04484	1.46756	0.913175	2.05157	0.959609	0.825529	0.841023	0.700951	1.21154	2.0845	1.32832	1.1009	1.18236	0.921759	0.839938	0.834768	0.894842	1.01946	0.788197	0.888945	0.946463	0.806808	0.917882	0.895613	1.06621	0.791879	0.985482	0.776135	1.75611	1.63515	0.835623	0.923124	1.06049	0.967296	3.47142	3.7186	1.85482	1.56883	1.36722	1.67709	1.07161	1.28132		1.20528
450	1.01737	0.837014	0.90953	0.745926	0.844813	1.04511	1.40634	0.905238	1.97421	0.944357	0.829163	0.814842	0.70506	1.17237	1.96876	1.24185	1.07227	1.12343	0.904953	0.834421	0.822438	0.876662	0.979733	0.776064	0.833069	0.881259	0.76592	0.898876	0.905825	1.00963	0.817051	0.986052	0.781303	1.70607	1.53959	0.819	0.922094	1.02955	0.934438	3.14953	3.55717	1.82286	1.56605	1.31466	1.5243	1.04089	1.23793		1.16585
460	1.0076	0.817273	0.921735	0.722443	0.805083	1.04052	1.398	0.870241	1.86726	0.933898	0.818489	0.81217	0.707236	1.06986	1.83206	1.22914	1.06288	1.05471	0.878714	0.793779	0.794118	0.841019	0.910978	0.747129	0.921102	0.923662	0.777573	0.873872	0.927567	1.003	0.861938	0.974666	0.78256	1.54403	1.4019	0.794413	0.877164	0.965901	0.905371	2.9954	3.46949	1.80472	1.56293	1.26866	1.48463	1.04157	1.22823		1.13461
470	0.988631	0.807748	0.932983	0.7256	0.807313	1.02349	1.32185	0.872405	1.67905	0.898142	0.794189	0.795072	0.685965	1.01941	1.69748	1.18017	0.975689	1.02667	0.852748	0.786729	0.796237	0.812002	0.884533	0.716884	0.934693	0.922461	0.763467	0.866237	0.932291	0.925639	0.809469	0.936521	0.787029	1.4855	1.3697	0.807572	0.861088	0.941735	0.902844	2.71241	3.14445	1.75061	1.52336	1.18409	1.35811	0.943484	1.14433		1.08698
480	0.971274	0.818192	0.85211	0.698171	0.811566	1.02511	1.29958	0.855087	1.61986	0.903441	0.80191	0.791153	0.717146	0.947299	1.59039	1.18171	1.02685	0.983005	0.855581	0.805671	0.805099	0.82248	0.853187	0.729584	0.889922	0.879859	0.760707	0.876548	0.915272	0.899558	0.827363	0.905779	0.77851	1.42037	1.32312	0.758744	0.828937	0.915616	0.889195	2.55451	2.91746	1.73709	1.50142	1.1666	1.3079	0.987379	1.15464		1.06302
490	0.942448	0.826226	0.841376	0.722837	0.800622	0.992669	1.22048	0.829831	1.52459	0.914453	0.781698	0.783673	0.673397	0.918732	1.51003	1.13335	1.02259	0.955341	0.87068	0.806223	0.794696	0.830541	0.835514	0.733337	0.886102	0.851457	0.767556	0.885774	0.893182	0.899558	0.818871	0.893254	0.747643	1.3524	1.24777	0.771557	0.866241	0.88486	0.875799	2.28313	2.69103	1.68896	1.44762	1.12534	1.23133	0.969838	1.14329		1.03166
500	0.925964	0.899563	0.836524	0.718693	0.812344	1.00186	1.19107	0.85184	1.45658	0.895884	0.775793	0.777083	0.674847	0.880029	1.46888	1.12304	0.985	0.926064	0.853485	0.805916	0.816658	0.808241	0.81423	0.728362	0.916216	0.863058	0.723602	0.864853	0.866646	0.900884	0.801887	0.842585	0.758677	1.36027	1.21455	0.781254	0.82028	0.871373	0.856589	2.1081	2.44028	1.64483	1.41858	1.11369	1.19308	0.969499	1.12354		1.01026
510	0.93957	0.861001	0.823804	0.727573	0.812396	0.995913	1.23693	0.807823	1.35326	0.881462	0.778518	0.766218	0.677989	0.823588	1.3566	1.1051	0.911734	0.89505	0.824219	0.759512	0.77832	0.790509	0.786366	0.700169	0.886458	0.860457	0.746908	0.858533	0.86873	0.895138	0.792789	0.835753	0.747503	1.2429	1.17481	0.782985	0.819662	0.872289	0.845721	2.01	2.34031	1.58165	1.36469	1.051	1.13921	0.882302	1.03942		0.979422
520	0.92012	0.836096	0.808438	0.703893	0.824948	0.957796	1.13369	0.793752	1.30627	0.880172	0.758987	0.76978	0.659619	0.844782	1.3068	1.08238	0.904686	0.895919	0.814166	0.818605	0.83785	0.810749	0.806103	0.724696	0.911597	0.887659	0.77328	0.896984	0.855532	0.896464	0.793092	0.819812	0.752531	1.19035	1.12618	0.771557	0.810594	0.832928	0.85027	1.76502	2.08055	1.53391	1.3253	0.961292	1.0747	0.836882	0.990408		0.956111
530	0.897356	0.869608	0.774398	0.700933	0.820747	0.954011	1.14839	0.821172	1.23307	0.822068	0.764665	0.774055	0.669771	0.795021	1.2447	1.09408	0.891286	0.872596	0.793672	0.7863	0.826291	0.789345	0.783013	0.719502	0.894452	0.877458	0.746192	0.877586	0.829899	0.873477	0.80583	0.786792	0.712586	1.14001	1.06829	0.762553	0.811006	0.83726	0.856084	1.61496	1.96337	1.4828	1.28496	0.978737	1.08604	0.873659	1.00438		0.936478
540	0.912575	0.760692	0.850787	0.660677	0.797147	0.92887	1.11043	0.80638	1.17648	0.82557	0.778064	0.754463	0.686449	0.79433	1.21279	1.05682	0.898595	0.847289	0.828528	0.772753	0.822438	0.799465	0.78456	0.726573	0.868425	0.861257	0.761014	0.869813	0.823161	0.839882	0.783387	0.765727	0.72781	1.15888	1.0426	0.768094	0.797609	0.792712	0.821962	1.52266	1.89426	1.43286	1.26499	0.957883	1.05415	0.878362	0.998014		0.920814
550	0.894565	0.748412	0.827333	0.654165	0.793724	0.899133	1.01202	0.806741	1.1256	0.862386	0.770116	0.754463	0.683307	0.781199	1.15588	1.06136	0.903293	0.8623	0.825034	0.782377	0.822823	0.808868	0.777337	0.736087	0.878196	0.875858	0.743944	0.871681	0.811144	0.828831	0.797338	0.761742	0.698061	1.08557	0.996023	0.778483	0.791632	0.768302	0.826006	1.44865	1.84646	1.39223	1.22077	0.96417	1.02448	0.863363	0.960769		0.906005
560	0.896091	0.789155	0.791676	0.658704	0.799222	0.938602	1.09902	0.805658	1.09367	0.847364	0.797368	0.795606	0.717871	0.78834	1.12935	1.02648	0.895984	0.842823	0.822317	0.751788	0.798549	0.800987	0.735671	0.724958	0.828805	0.819255	0.751201	0.877286	0.840805	0.840766	0.819781	0.786792	0.724877	1.08274	1.02548	0.785063	0.796167	0.807175	0.853809	1.37725	1.69487	1.3428	1.16021	0.932158	1.00554	0.870057	0.964441		0.900736
570	0.87747	0.784449	0.778736	0.661861	0.801971	0.909676	1.04899	0.818286	1.07705	0.82709	0.807815	0.789728	0.689591	0.78189	1.06994	1.03634	0.893113	0.824588	0.797399	0.773672	0.807025	0.758	0.735413	0.697768	0.809085	0.808454	0.764489	0.868013	0.790235	0.835462	0.788543	0.785084	0.667613	1.03176	0.990885	0.787141	0.795342	0.7932	0.813621	1.28495	1.60282	1.32657	1.12528	0.908514	0.964975	0.831417	0.923149		0.879669
580	0.851391	0.78686	0.760797	0.669557	0.790093	0.922652	1.11658	0.804576	1.00411	0.859206	0.789874	0.754285	0.69515	0.76346	1.04052	1.05328	0.851172	0.823471	0.817698	0.773795	0.796815	0.768389	0.723545	0.699732	0.76458	0.775452	0.712665	0.838858	0.769326	0.832367	0.777624	0.764019	0.662306	1.02421	0.944646	0.768787	0.776175	0.765373	0.817159	1.19961	1.54409	1.27399	1.09582	0.912012	0.966941	0.823832	0.911046		0.864636
590	0.858892	0.740493	0.778809	0.652784	0.801556	0.926167	1.14247	0.827667	1.0106	0.813958	0.814628	0.746626	0.663487	0.756088	1.02053	0.999606	0.793308	0.750527	0.716587	0.719605	0.761945	0.709819	0.666399	0.668265	0.72274	0.694646	0.665747	0.76574	0.778565	0.818664	0.778837	0.727583	0.662446	1.02106	0.946359	0.754242	0.796167	0.760674	0.822467	1.15056	1.42145	1.23544	1.06329	0.914935	0.954342	0.839085	0.922812		0.841674
600	0.880871	0.742903	0.783882	0.668965	0.733402	0.943739	1.13797	0.802772	0.987234	0.816723	0.775112	0.769602	0.661311	0.736506	0.99784	0.960953	0.812016	0.740107	0.725515	0.677308	0.729193	0.703103	0.645244	0.654692	0.72345	0.684846	0.657467	0.748878	0.74675	0.81336	0.770042	0.726445	0.649317	0.952469	0.897722	0.770865	0.794106	0.778005	0.811851	1.11834	1.42199	1.20089	1.02027	0.901164	0.945675	0.826417	0.891674		0.828489
610	0.871364	0.761151	0.747269	0.652784	0.715197	0.900485	1.13962	0.813235	0.965169	0.870127	0.754218	0.738612	0.668562	0.721071	0.984382	0.983514	0.758937	0.743456	0.686041	0.700541	0.729579	0.704715	0.655305	0.653907	0.740595	0.714048	0.656752	0.764148	0.764533	0.823527	0.773682	0.711642	0.665798	0.958448	0.878884	0.754935	0.766488	0.764885	0.807302	1.09425	1.30864	1.16832	1.00187	0.878495	0.905021	0.801038	0.869117		0.818971
620	0.873937	0.813371	0.710876	0.625749	0.715456	0.920219	1.11691	0.815039	0.954525	0.820824	0.765573	0.714745	0.690558	0.698955	0.975345	0.981589	0.770162	0.766034	0.708436	0.703054	0.726496	0.682594	0.674655	0.644873	0.698488	0.688446	0.6728	0.767285	0.791416	0.823084	0.807346	0.761742	0.65658	1.00376	0.919301	0.768094	0.755977	0.77593	0.824236	1.09251	1.30673	1.13253	0.973126	0.886863	0.913599	0.819299	0.873876		0.820915
630	0.863515	0.773776	0.749769	0.633445	0.742427	0.932114	1.11153	0.804937	0.93869	0.825708	0.738094	0.743064	0.653818	0.723144	0.981305	0.992369	0.824633	0.760948	0.734248	0.73162	0.752119	0.719939	0.665883	0.663377	0.692625	0.717848	0.672698	0.78959	0.772104	0.824853	0.793092	0.714489	0.675714	0.985194	0.884364	0.761168	0.763397	0.786976	0.811599	1.03214	1.20047	1.11111	0.943853	0.899083	0.916458	0.839085	0.882307		0.819802
640	0.857148	0.76402	0.726757	0.638575	0.741286	0.900485	1.12733	0.833439	0.923374	0.822344	0.755581	0.732734	0.653818	0.729365	0.949582	0.992984	0.846473	0.782285	0.773916	0.727268	0.762137	0.720118	0.68562	0.656263	0.716077	0.723848	0.68619	0.791343	0.759114	0.806729	0.776714	0.706519	0.657278	0.839507	0.859019	0.813113	0.739283	0.798754	0.78607	1.00021	1.17452	1.09263	0.945914	0.88673	0.895282	0.816079	0.875937		0.813825
650	0.85959	0.720867	0.695069	0.626538	0.747562	0.879669	1.11767	0.804937	0.914288	0.816446	0.747405	0.716882	0.606685	0.698494	0.94516	0.974659	0.825329	0.763553	0.74104	0.749581	0.749422	0.68743	0.658401	0.641119	0.705595	0.710447	0.667484	0.799231	0.762101	0.806287	0.776714	0.752633	0.637864	0.862162	0.844633	0.785756	0.735161	0.759637	0.81817	0.971184	1.07291	1.07983	0.927037	0.892752	0.864993	0.825951	0.874925		0.800453
660	0.853659	0.769415	0.706171	0.629103	0.758817	0.894808	1.10396	0.791226	0.884435	0.830869	0.728328	0.728994	0.643908	0.705636	0.940738	0.967036	0.823676	0.764669	0.753771	0.745903	0.774082	0.652235	0.658401	0.608387	0.772308	0.74945	0.669018	0.784769	0.746263	0.80054	0.763976	0.707088	0.648898	0.887335	0.865869	0.796145	0.742993	0.755121	0.758773	0.948254	1.07428	1.07042	0.903466	0.877609	0.874464	0.828662	0.860949		0.800104
670	0.856973	0.75438	0.729991	0.607989	0.741286	0.884535	1.09738	0.780042	0.897415	0.863538	0.746269	0.723651	0.62288	0.687897	0.918628	0.974197	0.836989	0.76529	0.755751	0.716785	0.764449	0.702476	0.654789	0.646706	0.704529	0.711447	0.634468	0.779948	0.739803	0.764735	0.732131	0.663251	0.638143	0.892684	0.839838	0.786102	0.757214	0.755853	0.794664	0.960445	1.07892	1.05053	0.892064	0.896604	0.85445	0.827857	0.859375		0.794582
680	0.855272	0.76425	0.706391	0.643904	0.743828	0.859935	1.06841	0.776073	0.885473	0.862201	0.73287	0.739146	0.598709	0.679143	0.906515	0.953022	0.830202	0.750403	0.755246	0.706548	0.753275	0.648294	0.627055	0.610176	0.725138	0.719648	0.650516	0.766109	0.717644	0.774902	0.740623	0.666097	0.643311	0.889223	0.809354	0.79372	0.767519	0.756464	0.806291	0.939257	1.10952	1.04145	0.881189	0.904662	0.871247	0.826459	0.853904		0.789587
690	0.853179	0.756216	0.69823	0.622197	0.731587	0.887779	1.09222	0.751899	0.875349	0.863445	0.720152	0.733446	0.632306	0.679604	0.877868	0.965958	0.787565	0.734276	0.735762	0.689262	0.785448	0.682684	0.630667	0.615457	0.649808	0.663644	0.653174	0.775289	0.733551	0.749705	0.747902	0.692286	0.630741	0.890167	0.807984	0.77883	0.777205	0.733762	0.792389	0.904426	1.14885	1.02607	0.86145	0.875927	0.845515	0.807817	0.834795		0.782635
700	0.849952	0.75174	0.716905	0.639167	0.729824	0.917786	1.14203	0.766692	0.886252	0.865058	0.729691	0.745736	0.630614	0.674766	0.874215	0.966266	0.79966	0.728073	0.730211	0.67314	0.79431	0.682505	0.640342	0.619167	0.662778	0.683246	0.661045	0.788575	0.747236	0.766945	0.733648	0.668944	0.641495	0.856184	0.767225	0.787141	0.749176	0.72351	0.79062	0.9082	1.11471	1.00893	0.840993	0.883631	0.820586	0.805571	0.825315		0.782762
710	0.839268	0.744624	0.692055	0.615685	0.717842	0.881291	1.11658	0.765971	0.884695	0.86128	0.74309	0.735406	0.623847	0.658409	0.863641	0.953022	0.82385	0.757474	0.755285	0.685522	0.790843	0.695311	0.650661	0.632478	0.686496	0.695246	0.667484	0.784654	0.748347	0.784627	0.732435	0.692855	0.638283	0.925409	0.824425	0.808958	0.758038	0.737973	0.779246	0.900943	1.09422	1.00138	0.845353	0.88217	0.823267	0.803876	0.827413		0.785771
720	0.84014	0.722244	0.689996	0.604634	0.726919	0.897241	1.06501	0.748292	0.880022	0.844231	0.75331	0.731665	0.576714	0.654723	0.82192	0.965804	0.774687	0.72125	0.716161	0.679453	0.783907	0.682863	0.612478	0.59752	0.680544	0.689246	0.666462	0.754737	0.730147	0.782859	0.710295	0.629092	0.638143	0.887964	0.807984	0.797876	0.759481	0.742855	0.798455	0.880626	1.03413	0.998732	0.829926	0.874731	0.807005	0.805486	0.826102		0.770725
730	0.812927	0.726376	0.65228	0.602661	0.723859	0.889401	1.12042	0.764888	0.857957	0.861556	0.715156	0.728103	0.568979	0.6591	0.879022	0.946939	0.784693	0.737502	0.72241	0.688281	0.760981	0.669788	0.643954	0.629466	0.658514	0.676645	0.662885	0.774851	0.731467	0.769155	0.733951	0.681469	0.651132	0.905585	0.794969	0.793374	0.753092	0.72827	0.783037	0.877723	1.10078	0.94784	0.820392	0.851176	0.787169	0.779641	0.792154		0.770255
740	0.81864	0.713292	0.656911	0.598714	0.712344	0.89616	1.11449	0.758394	0.842121	0.855382	0.738548	0.75286	0.610553	0.663017	0.847876	0.955409	0.768335	0.736137	0.7332	0.708694	0.750963	0.649011	0.629248	0.601753	0.721585	0.690246	0.666564	0.757205	0.744457	0.769597	0.740623	0.668375	0.661049	0.884818	0.798051	0.789911	0.743611	0.731565	0.772422	0.840861	1.03686	0.971849	0.812583	0.832181	0.823356	0.792945	0.80954		0.769624
750	0.81694	0.673353	0.653971	0.570495	0.700778	0.859664	1.0152	0.766692	0.841343	0.860819	0.765801	0.774946	0.604027	0.661404	0.869601	0.954793	0.766942	0.72522	0.7247	0.715498	0.786026	0.634413	0.629635	0.604328	0.674059	0.678845	0.638352	0.763779	0.750987	0.754568	0.724549	0.671221	0.646663	0.852093	0.771678	0.714071	0.773495	0.722595	0.77596	0.871047	1.06335	0.96424	0.811194	0.854807	0.796909	0.796165	0.799385		0.762694
760	0.809613	0.667958	0.592433	0.596346	0.705861	0.880751	1.11142	0.769939	0.843938	0.849899	0.755127	0.753573	0.617079	0.686976	0.875946	0.93947	0.776949	0.720878	0.728465	0.708694	0.745954	0.643727	0.619831	0.608954	0.729047	0.701447	0.631913	0.752546	0.735983	0.75943	0.735468	0.697979	0.640797	0.873805	0.774418	0.69641	0.730627	0.750056	0.771916	0.877433	1.04779	0.949869	0.78882	0.807121	0.793066	0.787395	0.799385		0.762606
770	0.823307	0.672549	0.61596	0.582138	0.672147	0.908865	1.12338	0.776073	0.823171	0.837458	0.749449	0.748942	0.606685	0.663247	0.865564	0.960183	0.753716	0.724104	0.706923	0.710533	0.756936	0.629577	0.616219	0.596429	0.720252	0.684846	0.62997	0.761726	0.728689	0.762967	0.723639	0.712212	0.63549	0.854611	0.775103	0.712686	0.711253	0.731687	0.798455	0.864952	1.07619	0.944459	0.794809	0.841524	0.785204	0.798538	0.804257		0.761214
780	0.815806	0.654301	0.657647	0.574244	0.700207	0.906162	1.11427	0.743962	0.848092	0.839393	0.750812	0.77263	0.615629	0.677761	0.844415	0.952329	0.776862	0.733408	0.745698	0.70661	0.73767	0.653757	0.624217	0.625058	0.747346	0.711647	0.620055	0.762349	0.755711	0.7528	0.748509	0.687162	0.649177	0.8823	0.781611	0.704375	0.750412	0.727233	0.778993	0.848408	0.993156	0.93437	0.764722	0.813408	0.815761	0.775955	0.796538		0.763254
790	0.833162	0.650858	0.642501	0.579572	0.69834	0.890483	1.12985	0.763084	0.832516	0.844047	0.753537	0.75197	0.622396	0.679373	0.845761	0.955332	0.756849	0.722863	0.707815	0.696188	0.80375	0.631727	0.619315	0.598567	0.736864	0.691646	0.654809	0.7525	0.743554	0.742633	0.775501	0.692855	0.624037	0.917542	0.812094	0.697103	0.753916	0.766533	0.78607	0.865533	1.03932	0.939612	0.77713	0.806899	0.835239	0.774768	0.803207		0.765941
800	0.826883	0.682305	0.565231	0.577402	0.695591	0.848581	1.07137	0.770661	0.818239	0.838011	0.72424	0.767999	0.590733	0.658409	0.845568	0.940933	0.748843	0.713063	0.709329	0.673385	0.78487	0.618741	0.609124	0.560292	0.757295	0.715648	0.63089	0.764494	0.749459	0.753684	0.733951	0.662681	0.615657	0.952784	0.821342	0.730694	0.72094	0.752131	0.788598	0.856535	1.02484	0.921521	0.763381	0.811106	0.75	0.771209	0.780576		0.754664
810	0.834601	0.671861	0.569421	0.568127	0.685477	0.860475	1.07763	0.760198	0.827584	0.848056	0.730145	0.73879	0.602093	0.679604	0.846145	0.945476	0.786695	0.691602	0.712046	0.702319	0.759633	0.568858	0.585905	0.526905	0.718564	0.682245	0.660636	0.772175	0.761962	0.731582	0.729705	0.660974	0.611187	0.927926	0.802162	0.722729	0.737428	0.775381	0.770905	0.872789	1.05871	0.931383	0.76386	0.868887	0.716226	0.813325	0.832846		0.755388
820	0.827275	0.645234	0.560305	0.57977	0.698755	0.882373	1.10209	0.746848	0.865225	0.857778	0.726057	0.757669	0.579131	0.65288	0.831149	0.942935	0.781387	0.703015	0.645325	0.678289	0.766568	0.595546	0.580358	0.51822	0.708526	0.684446	0.655832	0.754737	0.754182	0.778438	0.735164	0.660974	0.614539	0.949952	0.805929	0.73381	0.698887	0.764519	0.773685	0.856244	0.994522	0.912447	0.752314	0.844667	0.739457	0.789937	0.816959		0.751156
830	0.82444	0.636971	0.574494	0.561023	0.690871	0.875074	1.07829	0.728448	0.829401	0.835615	0.714248	0.747517	0.588316	0.639519	0.83211	0.947709	0.771206	0.72001	0.70079	0.679821	0.768687	0.558918	0.586679	0.526992	0.718298	0.684246	0.648165	0.77951	0.753488	0.727603	0.729099	0.690578	0.613282	0.947435	0.797366	0.736581	0.715169	0.765556	0.77874	0.840861	0.989878	0.920393	0.75423	0.824212	0.753842	0.788962	0.808079		0.748568
840	0.800411	0.647988	0.542586	0.553919	0.689471	0.862638	1.04438	0.723757	0.83641	0.838379	0.725149	0.779576	0.598226	0.665781	0.841146	0.942781	0.778776	0.730058	0.710028	0.69153	0.756358	0.552201	0.55701	0.530527	0.72878	0.692046	0.649494	0.77289	0.745638	0.761198	0.711205	0.72189	0.599595	0.926353	0.807642	0.722383	0.738664	0.736264	0.769136	0.858857	1.01337	0.912729	0.741055	0.84387	0.805486	0.805613	0.819057		0.750687
850	0.805296	0.638807	0.556996	0.566351	0.67972	0.889942	1.08432	0.753343	0.842641	0.837227	0.720834	0.776905	0.60451	0.672693	0.842684	0.935389	0.771119	0.728942	0.659919	0.696372	0.79142	0.574321	0.575585	0.53415	0.74708	0.697046	0.649392	0.769984	0.747653	0.75501	0.715451	0.695702	0.616215	0.93768	0.803532	0.726538	0.734749	0.74377	0.765597	0.85131	1.08657	0.910418	0.753368	0.843649	0.784578	0.805147	0.81561		0.755224
860	0.802766	0.653842	0.55582	0.574836	0.672355	0.885617	1.0818	0.737468	0.837708	0.826722	0.745588	0.778151	0.607894	0.666012	0.857104	0.924609	0.788	0.726957	0.680141	0.700173	0.767146	0.627607	0.592871	0.571203	0.757651	0.683246	0.645201	0.765255	0.733968	0.740422	0.719697	0.647879	0.612584	0.944288	0.835043	0.733118	0.717024	0.7622	0.786323	0.845505	1.05461	0.910418	0.744457	0.846084	0.779753	0.798665	0.811189		0.756106
870	0.807215	0.629281	0.55729	0.558458	0.671214	0.882643	1.07653	0.782206	0.828622	0.791841	0.767163	0.803621	0.63279	0.678222	0.847876	0.934003	0.796614	0.713807	0.658793	0.702748	0.801631	0.536439	0.595709	0.496267	0.738907	0.681045	0.646325	0.757297	0.733551	0.726277	0.661769	0.619414	0.599735	0.922262	0.777501	0.710262	0.702597	0.724181	0.772422	0.85131	1.01446	0.902528	0.746277	0.860563	0.797981	0.816248	0.826963		0.747678
880	0.811663	0.612754	0.522221	0.547999	0.668828	0.906162	1.11296	0.76561	0.84913	0.808844	0.781244	0.765862	0.612486	0.6591	0.86018	0.912212	0.775122	0.713063	0.7044	0.702993	0.754046	0.603964	0.586163	0.56889	0.717498	0.672445	0.636512	0.763202	0.757239	0.765619	0.708475	0.669513	0.602807	0.91062	0.801134	0.72827	0.734955	0.739743	0.764081	0.847537	1.04287	0.892327	0.740241	0.849051	0.784132	0.798495	0.807329		0.751915
890	0.799321	0.62733	0.52575	0.545039	0.659284	0.914542	1.09562	0.773908	0.855101	0.847364	0.781017	0.760875	0.61587	0.661635	0.868832														0.760156	0.745727	0.715451	0.673498	0.593869	0.949952	0.81689	0.743161	0.733718	0.752375	0.75574	0.861469	1.04014	0.886973	0.739091	0.850423	0.794049	0.800699	0.806392		0.775037
900	1.01911	3.55843	1.56688	8.48599	4.12884	9.66149	5.87549	5.04105	3.75424	0.920397	11.6921	1.15556	9.56387	5.247	5.4191	6.5133	4.22253	5.24054	1.1843	3.01953	6.73517	3.51659	4.27303	1.15105	1.92606	5.10214	2.2626	0.800615	0.726466	0.830599	1.3572	6.46684	1.30925	5.98762	1.34436	2.5273	2.04411	1.00203	1.35881	2.92081	3.18487	1.06726	0.861067	0.961824	2.17655	1.53386	1.40055		3.4489
910	1.4812	6.62977	3.50453	10.38	6.20685	10.6082	10.2696	12.2407	9.25866	1.01647	13.3509	3.96378	10.9174	8.8489	10.1947	9.17148	5.67637	6.27379	1.58932	4.65055	7.82693	4.38779	4.7569	1.44581	2.70557	6.36662	3.64888	0.859202	0.79211	1.06532	2.64435	8.88528	2.84951	8.52093	3.28468	5.17373	4.23351	1.45337	3.09777	5.87384	6.04334	1.32347	1.05936	1.25941	3.94478	2.72902	2.16963		5.20499
920	2.19073	7.82751	4.79578	10.5543	6.59699	10.4701	12.2574	14.574	12.0194	1.17207	13.5968	12.509	10.9128	10.438	12.394	10.3379	6.05253	6.75636	2.21866	5.87	7.80035	4.22533	4.84771	1.61519	3.49564	8.01773	4.65368	0.92584	0.853379	1.5224	4.2648	9.78935	4.64801	10.4101	5.42367	6.84982	6.13232	2.07851	6.78927	6.87637	7.1056	1.69228	1.30528	1.7271	5.32559	3.9657	2.98868		6.35903
930	3.07771	8.67715	5.6576	10.5618	6.89917	10.9529	14.0742	15.012	13.5427	1.36302	13.7742	14.2641	11.0842	11.2003	13.6604	10.7776	6.46933	6.7963	2.60342	6.64226	8.07411	4.70428	4.92756	2.06559	4.09472	8.10134	5.47664	1.08603	0.909645	2.10634	5.96957	10.1412	5.54343	12.2012	7.47154	8.19624	7.78669	2.88171	10.1335	6.75911	6.88463	1.99036	1.49677	2.18439	5.75849	4.62548	3.44739		7.06613
940	3.96207	8.54264	6.15747	10.8157	7.00047	11.2386	15.4542	14.7908	14.1616	1.64879	13.5584	13.9113	11.0364	11.7454	14.2905	10.8077	6.15781	6.66046	2.93765	6.92437	7.73947	5.0428	5.20723	2.64443	4.68884	7.18748	5.55699	1.17495	0.942919	2.53644	7.63612	10.1435	6.48325	13.2128	9.0447	8.22256	8.34563	3.58484	11.2534	5.85207	5.98625	2.23614	1.63542	2.77252	5.69058	4.74403	3.67941		7.34143
950	4.71054	8.57776	6.37333	10.3238	6.92583	11.0118	15.8313	13.834	14.5025	1.93083	12.8272	14.1282	9.74346	11.7728	13.905	10.731	6.0829	6.34127	3.00686	6.74611	7.45145	5.02784	5.17472	2.81599	4.95791	6.70405	5.72687	1.33062	0.977443	2.86974	9.02032	9.35269	7.0686	13.4164	9.46427	7.82119	8.17395	4.17275	11.3207	4.89336	5.00238	2.29673	1.7297	3.17079	5.28529	4.56451	3.66146		7.29273
960	5.40812	8.18479	5.90875	9.89674	6.6486	10.5933	15.8439	12.4825	14.8555	2.25231	12.5033	14.3679	9.3867	11.7219	14.7853	10.7577	5.81611	5.97358	3.06287	6.35605	7.16363	4.68646	4.69666	2.87299	4.87219	6.0276	5.6406	1.46154	1.04225	2.92367	9.10767	8.60063	7.0957	13.6395	10.0154	6.77294	8.35346	4.59993	11.3328	3.96717	4.17503	2.29819	1.70584	3.33076	4.71605	4.40969	3.56359		7.14634
970	5.64989	8.02709	6.2407	10.0919	6.44352	10.303	15.9246	10.6514	14.3719	2.44469	11.7952	13.9556	9.2453	11.7164	14.9191	10.5969	5.69699	5.73465	2.95601	6.02994	6.83149	4.48209	4.55979	2.87391	4.85877	5.68958	5.46611	1.55607	1.05087	3.10801	9.20593	7.92087	6.90491	13.2899	10.1113	5.92416	8.1115	4.87478	11.2031	3.4064	3.64321	2.23885	1.70388	3.57185	4.37018	4.28767	3.53215		6.96962
980	5.98582	7.70677	6.05836	9.12062	6.06997	9.60526	14.82	10.1449	15.0097	2.81238	11.2011	13.38	9.28301	11.7528	14.7723	10.3424	5.41106	5.58293	3.06655	5.5353	6.20402	4.19927	4.36797	2.77396	4.82857	5.23795	5.11837	1.73693	1.10255	2.9975	9.04792	7.54569	6.72292	12.9117	10.549	5.05876	7.43673	4.96766	10.8238	2.99657	3.19935	2.14219	1.62157	3.55852	4.03422	4.04027	3.39385		6.72934
990	6.10605	7.49479	5.98256	9.30138	5.88211	9.37656	15.3681	9.96123	14.7055	3.0695	10.8157	12.9308	8.84165	11.8585	14.4821	9.75005	4.66082	5.14688	2.90823	5.01094	5.60641	3.88583	4.11888	2.63959	4.5579	4.86252	5.07441	1.85608	1.16701	2.96302	9.16438	6.9815	6.7827	12.8582	10.6682	4.65358	7.1183	4.86246	10.389	2.61837	2.85847	2.04554	1.54985	3.58349	3.95729	4.05027	3.41056		6.55186
1000	5.93645	7.1848	5.85302	9.05333	5.72982	9.01566	15.3731	9.72959	14.8015	3.31269	10.2304	11.9011	8.64587	11.7795	14.4537	9.21121	4.38116	4.66282	2.58433	4.61433	4.98395	3.40643	3.65281	2.25217	4.37206	4.35149	4.57344	1.84981	1.218	2.92588	8.86352	7.41019	6.2757	11.2408	9.71465	3.94713	6.28957	4.72601	9.61609	2.45757	2.78499	1.89664	1.47147	3.58039	3.88081	4.21831	3.51592		6.25384
1010	5.90082	7.03365	5.46152	9.01544	5.60285	8.72019	14.9538	9.81005	14.761	3.49304	9.56456	11.1964	8.00559	11.2586	14.3135	8.39063	3.99673	4.44895	2.33095	4.23009	4.56223	3.21478	3.48279	2.28058	4.4314	4.40309	4.16283	1.84684	1.19466	2.75349	8.49382	6.6012	5.95712	10.7572	9.71157	3.75667	5.39221	4.44932	9.03122	2.52462	2.81422	2.0018	1.54981	3.6488	3.93379	4.21098	3.58067		6.0263
1020	5.80928	6.94332	5.32727	9.13581	5.29103	8.80967	14.9528	9.86994	14.6164	3.57082	9.34313	10.5441	7.85935	11.0319	13.9125	8.10188	3.55261	4.05272	2.34581	3.81914	4.14821	2.88029	3.16365	2.11526	3.70235	3.44063	3.80865	1.80898	1.29275	2.61866	8.12259	5.94762	5.67429	9.79026	9.39029	3.50629	5.23495	4.1874	8.41576	2.63346	2.97209	1.9659	1.52144	3.57056	3.84292	4.15941	3.55549		5.79489
1030	5.65953	6.9066	5.56754	9.30197	5.34144	8.51798	14.7772	9.13969	13.8501	3.50373	9.13964	9.99877	7.68388	11.1003	13.5499	8.11212	3.44628	3.75251	1.98465	3.51135	3.83457	2.74506	2.9797	1.95199	3.40476	3.13941	3.65501	1.8819	1.30789	2.4109	7.55333	5.62938	5.30753	9.07347	9.12176	3.33937	4.65932	3.89521	7.98809	2.83228	3.22639	1.97588	1.5489	3.65752	4.02162	4.38995	3.89018		5.62269
1040	5.55779	6.98464	5.42071	8.72772	5.10788	8.09626	14.3268	8.14389	13.4293	3.53018	8.90186	9.60249	7.32567	10.5207	12.8162	8.13868	3.19464	3.50813	1.95503	3.37704	3.66061	2.57383	2.91521	1.84	3.04508	2.74958	3.38771	1.94763	1.25648	2.29332	6.73264	5.21776	4.84397	7.99451	8.67205	3.22059	4.81987	3.3051	7.6269	3.09873	3.35204	2.0833	1.60471	3.90091	4.01823	4.37978	3.97651		5.38686
1050	5.3516	6.95274	5.82787	8.28392	4.95228	7.68345	13.955	7.21412	12.5604	3.38379	9.12829	9.18625	7.50598	9.65106	12.1321	7.87011	2.95822	3.32763	1.87604	3.21079	3.33946	2.37699	2.58368	1.73395	2.71747	2.37296	3.06552	1.93495	1.2949	2.24425	6.12758	4.79647	4.62273	7.28685	8.19287	3.21886	4.31162	3.40702	7.32031	3.26447	3.59568	2.15008	1.64447	4.01364	3.91199	4.02663	3.75382		5.15576
1060	5.17337	7.11066	6.00925	7.7525	4.77889	7.96676	14.204	6.4983	11.4816	3.17759	8.34523	8.7595	7.18112	9.02422	11.3015	7.62441	2.60024	3.05111	1.81142	2.95848	3.27935	2.14755	2.39432	1.53026	2.61105	2.27075	2.84105	1.9459	1.28024	2.2248	5.74999	4.72132	4.37301	6.32525	7.62122	3.27046	4.04472	3.02842	7.017	3.48419	3.74892	2.28044	1.71528	4.38517	3.99678	4.2764	4.01892		4.96581
1070	5.05667	6.73708	5.61452	7.66429	4.53615	7.79699	13.8847	3.08589	10.4486	2.93923	8.49216	7.99524	7.06607	8.1352	10.3149	7.46271	2.49565	2.92979	1.72909	2.82233	3.063	1.98509	2.28557	1.40108	2.67696	2.33216	2.65379	1.93139	1.25989	2.08468	5.12553	4.52718	3.95344	5.61066	6.8242	3.18319	3.69044	2.78053	6.29918	3.52541	3.90024	2.30806	1.73138	4.44716	3.80558	4.00718	3.91873		4.64934
1080	4.8476	5.27905	4.53103	7.38407	4.3195	7.78456	13.9896	1.67951	9.84638	2.81183	8.00184	7.29225	6.64792	7.06074	9.45199	7.28053	2.41986	2.77943	1.64347	2.56726	3.26259	1.97632	2.10188	1.39082	2.33114	2.01033	2.52755	2.0562	1.21772	1.93394	4.80344	4.12069	3.68095	5.17329	6.36283	3.16622	3.25268	2.66562	6.04693	3.63164	3.93275	2.32147	1.79821	4.37866	3.74464	3.70958	3.72456		4.36045
1090	4.55198	4.45799	4.06638	7.28106	4.157	7.68318	13.6744	4.26425	9.01283	2.67346	7.70388	6.50199	6.18191	6.53848	8.72389	6.8926	2.19537	2.51619	1.49291	2.52711	3.14642	1.75297	1.92425	1.24209	2.11874	1.84992	2.39078	2.0544	1.23849	1.72795	4.53321	3.90948	3.62075	4.49992	5.66069	3.11843	3.14551	2.49415	5.8331	3.53353	3.94012	2.35991	1.81345	4.24437	3.68379	3.5273	3.59289		4.17135
1100	4.31853	4.50229	4.06675	6.91284	4.05524	7.06087	13.5036	5.1197	8.32542	2.54656	6.69258	5.97889	5.18849	5.90679	8.12615	6.60393	2.02447	2.31671	1.35364	2.40469	3.02081	1.70774	1.72314	1.14472	1.96319	1.69991	2.23418	2.08407	1.19265	1.62362	4.17776	3.73242	3.45148	4.41402	5.51683	3.03151	2.84171	2.29862	5.41479	3.66124	4.02807	2.33308	1.87405	4.52172	3.68335	3.75483	3.76229		3.99787
1110	4.02892	4.18197	3.71988	6.75477	3.94824	6.6205	13.0736	5.49745	8.10425	2.48334	6.71733	5.89589	5.41787	5.88675	7.58647	6.35122	1.91884	2.16884	1.25253	2.40929	2.9503	1.66744	1.70753	1.14193	2.0419	1.79352	2.13953	2.1174	1.17021	1.60948	3.83232	3.64987	3.18709	4.02101	5.01265	2.92278	2.44786	2.07295	5.02074	3.78808	3.99803	2.39259	1.95373	4.4681	3.68066	3.685	3.75896		3.87765
1120	3.83935	3.4945	2.87269	6.31945	3.87085	6.28096	13.1155	5.94701	7.8283	2.37631	6.24336	5.60843	4.91923	5.94734	7.88755	5.89253	1.98653	2.01439	1.14036	2.21061	2.97727	1.57529	1.61711	1.04879	1.88555	1.75052	1.92426	2.08148	1.16639	1.54052	3.84414	3.36635	3.14281	3.87249	4.78831	2.70461	2.44312	1.97434	4.78568	3.79795	4.10592	2.42647	1.95904	4.41514	3.49839	3.43752	3.58221		3.73419
1130	3.6107	3.13022	2.74712	5.66943	3.69201	6.36692	12.4691	6.50371	7.89554	2.26885	6.31468	5.58545	5.01688	6.08487	8.10942	5.65422	1.9258	2.07741	1.1987	2.24617	2.90965	1.56194	1.60756	1.01418	1.81049	1.70911	1.82664	2.075	1.11485	1.46449	3.61092	3.23997	2.95817	3.39107	4.53759	2.63569	2.31018	1.85753	4.5539	3.68417	4.0054	2.44676	2.04236	4.45632	3.40502	3.46002	3.60222		3.65656
MAX	6.10605	8.67715	6.37333	10.8157	7.00047	11.2386	15.9246	15.012	15.0097	3.57082	13.7742	14.3679	11.0842	11.8585	14.9191	10.8077	6.46933	6.7963	3.06655	6.92437	8.07411	5.0428	5.20723	2.87391	4.95791	8.10134	5.72687	2.1174	1.96287	4.96857	9.20593	10.1435	7.0957	13.6395	10.6682	8.22256	8.35346	4.96766	11.3328	6.87637	7.1056	2.44676	2.04236	4.52172	5.75849	4.74403	4.01892		7.87177
[truncated: 1 more columns]

## Sheet: Endogenous_C17
Time [s]	cell1	cell2	cell3	cell4	cell5	cell6	cell7	cell8	cell9	cell10	cell11	cell12	cell13	cell14	cell15	cell16	cell17	cell18	cell19	cell20	cell21	cell22	cell23	cell24	cell25	cell26	cell27	cell28	cell29	cell30	cell31	cell32	cell33	cell34	cell35	cell36	cell37	cell38	cell39	cell40	cell41	cell42		Average	Std. Err.
0	0.942935	0.963566	0.915409	0.946558	0.946089	0.978191	0.979304	1.02129	0.946089	0.958358	1.00491	1.06498	1.05726	1.16954	1.06485	0.668468	0.559163	1.20308	1.02854	1.10213	1.05	1.10435	1.14113	1.13067	1.19619	1.19583	1.24784	1.18259	1.57429	0.830065	0.993355	0.814211	0.986136	0.89738	0.771663	1.16251	0.95116	0.972133	0.924291	1.1529	1.09252	1.06492		1.02278	0.167365
10	0.977951	0.962543	0.911927	0.931153	0.958327	0.982321	0.977761	0.96525	0.958327	0.948387	1.0171	1.0789	1.03523	1.08229	1.044	0.634623	0.590659	1.17314	1.0445	1.07057	1.03981	1.02742	1.14099	1.14935	1.14999	1.18752	1.27519	1.18805	0.964762	0.840972	0.994628	0.795857	0.973948	0.875199	0.917639	0.819685	0.967273	0.973729	0.956563	1.11662	1.05093	1.02328		0.994628	0.13373
20	0.952792	0.970458	0.990468	0.957222	0.859231	0.976126	0.940718	1.00874	0.859231	0.985337	1.00669	1.07977	1.05052	1.02789	1.03272	0.613491	0.579873	1.16653	1.07101	1.0883	0.982291	1.05036	1.08978	1.11479	1.14254	1.16052	1.27744	1.15072	0.909114	0.787782	0.997875	0.823079	1.01781	0.931791	0.958434	0.845371	0.988593	0.993087	0.973766	1.10121	1.06824	1.05245		0.99129	0.133134
30	1.02385	1.02182	0.961451	0.999882	0.962645	0.981633	0.992423	1.03049	0.962645	0.978886	1.00528	1.05088	0.959487	1.05503	1.00496	0.632312	0.566498	1.06602	1.08476	1.05479	1.10908	1.05714	1.03501	1.0899	1.00542	1.0976	1.07826	1.09108	0.953039	0.790634	0.96061	0.833804	0.974977	0.860067	0.969002	0.682096	0.948525	0.924605	0.92717	1.05627	1.05057	0.991408		0.973382	0.119719
40	1.04269	1.05521	1.03303	0.919303	0.849393	0.956851	0.925284	0.996198	0.849393	0.915543	1.00875	1.07977	0.881231	0.964128	1.01181	0.607053	0.605976	1.06193	1.11423	1.08138	0.997314	1.03956	1.08143	1.07922	1.12907	1.10131	1.06732	1.09062	0.902673	0.784761	0.997775	0.90846	0.970194	0.871468	0.87537	0.886317	0.986694	0.971023	0.985104	1.02912	1.06775	1.01314		0.971306	0.11729
50	1.04534	1.0762	1.0249	0.981159	0.955927	0.968553	0.934545	0.979469	0.955927	0.920821	0.997961	1.02981	0.919957	0.92166	0.974533	0.633798	0.564988	1.0351	1.07494	1.05695	1.02267	1.04939	1.06144	1.06579	1.06331	1.04626	1.03193	1.05719	0.922718	0.739626	1.00876	0.900417	1.02507	0.935729	0.816881	0.878942	1.00256	0.967762	0.999606	1.03856	1.06285	1.00895		0.970452	0.110465
60	1.01326	1.06624	0.93282	1.0032	0.994558	0.985763	0.960011	0.97696	0.994558	0.939003	0.988859	1.03469	0.809514	1.02642	0.957199	0.677878	0.568871	1.00594	1.07322	1.0362	1.03593	1.04515	1.04336	1.04944	1.04375	0.994328	0.95953	1.01342	0.919534	0.624856	0.97427	0.892993	0.977754	0.874784	0.694988	1.15056	0.981058	0.965195	0.976432	1.00444	1.02692	0.995753		0.959277	0.119708
70	1.06255	1.02807	0.919665	1.00652	0.930733	1.03739	1.02638	1.02045	0.930733	0.94956	1.005	1.03939	0.826915	0.988505	0.986132	0.662029	0.569086	1.03549	1.07421	1.0803	0.965806	1.02184	1.05966	1.03876	1.10034	1.00501	0.985272	1.01862	0.906509	0.665797	0.972697	0.975693	0.975388	0.888673	0.660582	1.103	0.996558	0.968941	1.0097	1.01183	1.02499	1.01614		0.965498	0.12106
80	1.06049	1.04993	1.02103	1.00747	1.02239	1.00779	0.95924	1.00456	1.02239	0.977713	1.01251	1.02198	0.861516	1.01821	0.98737	0.647005	0.565419	1.02013	1.0526	1.04961	1.0018	1.00099	1.03254	1.02252	1.04523	0.923845	0.898714	0.944481	0.982636	0.745498	0.968076	0.940014	1.00419	0.914585	0.621262	1.17269	1.00514	0.984136	1.02242	0.981514	1.01946	1.01148		0.966966	0.118746
90	0.980011	1.03927	1.01175	1.00344	1.02815	1.00091	1.03332	1.03969	1.02815	0.970674	1.00556	1.02007	0.935346	0.974328	0.940386	0.70776	0.528098	0.974054	1.04474	1.03815	1.00266	0.993914	1.01872	1.01494	1.01681	0.923548	0.94151	0.951375	0.919389	0.696839	0.949493	0.874638	0.984953	0.890539	0.598899	1.23881	0.963168	0.934041	0.993101	0.963857	0.963704	0.933467		0.954101	0.122167
100	0.993105	1.02252	1.0013	0.997749	0.988559	1.01192	1.0341	1.01544	0.988559	0.990029	1.011	0.999177	0.921767	1.02103	0.933153	0.661864	0.557869	0.996801	0.964454	1.04744	0.973469	0.982297	1.00721	1.00778	1.01877	0.887787	0.954703	0.99352	0.944862	0.706738	0.961882	0.894436	0.958623	0.841617	0.696217	1.1091	0.97971	0.959783	0.999748	0.961427	0.994324	0.925345		0.95041	0.108379
110	0.998255	1.01676	0.975766	0.959118	1.04255	1.00779	1.00168	1.01627	1.04255	0.985924	1.02996	1.01745	0.926796	1.09031	0.944427	0.632807	0.546867	0.979497	0.995145	0.979574	1.07561	0.996148	0.97175	0.975913	0.955904	0.874729	0.89614	0.961261	0.976123	0.771674	0.969315	0.833597	0.97544	0.871468	0.688107	1.10453	0.973644	0.949236	0.993635	0.911576	0.947607	0.92581		0.94735	0.111767
120	0.998107	1.01369	0.96532	1.0205	1.02095	0.996089	1.01789	1.01209	1.02095	0.990616	1.02442	0.964014	0.992781	1.04663	0.930482	0.68151	0.547298	0.975998	0.991953	0.974819	1.0316	0.982595	0.951759	0.962485	0.927237	0.99507	0.973044	0.949359	0.988932	0.754559	0.917853	0.97363	0.974	0.87893	0.653456	1.01348	0.965251	0.92405	0.966338	0.904697	0.899361	0.883803		0.944228	0.104427
130	0.94882	1.03189	0.830291	1.00723	1.05838	0.979568	1.01943	1.01209	1.05838	0.981232	1.0156	0.953744	0.96854	0.990494	0.868641	0.667147	0.549024	0.979303	0.977221	1.0014	0.94181	0.947074	0.969696	0.961888	0.994659	1.04433	1.01648	0.966464	1.00709	0.760935	0.971223	0.891755	0.96644	0.860274	0.858167	0.799593	0.968559	0.940494	0.961113	0.899836	0.93169	0.878992		0.938977	0.100976
140	1.00841	1.02602	0.842285	1.02382	1.02695	1.0016	1.02175	0.98867	1.02695	0.995894	1.01842	1.0131	0.948221	0.978177	0.866034	0.680189	0.520548	0.959277	0.946775	0.964228	0.896791	0.95534	0.986949	0.947266	1.00075	1.01302	1.0271	0.979797	1.011	0.790466	0.912227	0.924959	0.978114	0.884735	0.748808	0.861648	0.955326	0.931613	0.936446	0.867825	0.931106	0.91862		0.936124	0.101964
150	1.019	0.992102	0.886779	1.00984	1.04111	0.977502	0.983163	1.01209	1.04111	0.991789	1.03606	0.994825	0.988355	0.956879	0.878546	0.692571	0.520979	0.972304	0.974766	0.956447	0.976696	0.939776	0.926428	0.935031	0.932466	0.969102	0.965643	0.949034	0.996892	0.78107	0.965598	0.84494	1.00496	0.884527	0.798941	0.836979	0.99037	0.960754	0.963885	0.884472	0.911501	0.956954		0.935767	0.097827
160	1.02106	0.982357	0.873237	1.03756	1.03295	0.996089	0.977761	0.949357	1.03295	0.940176	1.05501	0.996914	0.843813	0.953992	0.897183	0.691251	0.544925	0.930309	0.928115	0.930509	0.993533	0.965542	0.925196	0.926556	0.914872	0.964651	0.93604	0.935571	0.991175	0.7955	0.94879	0.866801	1.03005	0.929718	0.890852	0.72177	0.995884	0.957493	0.961504	0.880574	0.953542	0.936726		0.929473	0.096986
170	1.01223	1.02252	0.90651	0.962199	0.9041	1.01399	1.0148	0.984488	0.9041	0.987097	1.06496	1.01693	0.845624	0.862769	0.881673	0.700826	0.516881	0.905034	0.90307	0.936561	0.992122	0.959063	0.950664	0.912054	0.960026	0.965541	0.942476	0.94188	0.982853	0.738283	0.919225	0.961256	1.00732	0.884735	0.972688	0.658952	0.966415	0.951526	0.953471	0.877272	0.942391	0.948314		0.92226	0.103361
180	1.03415	0.993233	0.964159	1.02334	1.00416	0.99127	0.983163	0.981979	1.00416	0.997067	0.913132	0.881504	1.12374	0.883682	1.02582	1.59861	2.17193	0.892591	0.9097	0.831514	0.997667	0.96785	0.887816	0.896119	0.830164	0.908858	0.889061	0.900841	1.02186	0.938459	1.01057	1.00828	1.0262	1.03523	1.07787	0.95295	1.01984	1.03888	1.03284	0.980918	0.913435	0.999064		1.01294	0.217349
190	1.01135	1.02441	1.00517	1.00391	0.94537	1.01674	1.01017	1.02464	0.94537	0.946628	0.923454	0.887597	1.18359	0.940905	1.13405	2.328	2.84112	0.89298	0.931307	0.904355	0.964344	0.955266	0.908902	0.911994	0.871073	0.927258	0.919308	0.920157	0.97236	1.42287	1.09266	1.27948	1.04435	1.30078	1.72346	1.01551	1.04594	1.11888	1.10709	1.01481	0.964603	1.04304		1.10536	0.37495
200	0.931459	0.808768	1.25898	1.03993	1.12869	1.00435	1.04644	0.925937	1.12869	1.07214	0.90966	0.864793	1.37299	0.972147	1.23161	2.80991	3.37698	0.89959	0.930324	0.904355	0.957942	0.970904	0.904383	0.898804	0.844375	0.906929	0.860102	0.888614	1.02323	2.49741	1.1831	1.60862	1.0552	1.63245	2.21447	1.36038	1.13704	1.2421	1.14569	1.124	1.0472	1.16451		1.22108	0.544547
210	0.92219	0.832405	1.76775	1.15891	1.2988	1.12757	1.16066	1.03384	1.2988	1.57713	0.945694	0.909704	1.54681	1.07498	1.40442	3.3709	3.60695	0.874898	0.88441	0.910407	0.991063	0.988031	0.905205	0.908712	0.857047	0.906929	0.856884	0.92536	1.12896	3.5352	1.33002	2.15308	1.08888	2.05533	2.79224	1.62513	1.2113	1.37053	1.21009	1.23627	1.13529	1.30786		1.38635	0.714703
220	1.0268	0.807961	2.42819	1.31888	1.69783	1.64041	1.7487	1.38096	1.69783	2.49795	0.974783	0.923456	1.70543	1.22054	1.52967	3.6509	3.58171	0.847874	0.881463	0.908462	1.06144	1.07091	0.962987	0.929242	0.886882	0.911084	0.861389	0.914954	1.2603	4.70656	1.4013	2.78952	1.15296	2.35881	2.95714	2.18947	1.33034	1.51506	1.31924	1.27411	1.31186	1.44345		1.59711	0.873757
230	1.24351	0.849097	2.84566	1.56843	2.12876	2.35014	2.42241	2.13292	2.12876	3.35777	1.00519	0.970629	1.81245	1.34057	1.64475	4.03078	3.48355	0.836208	0.875571	0.867827	1.17925	1.22216	0.960248	0.969826	0.856555	0.862265	0.847231	0.927832	1.34627	4.87837	1.49639	3.20302	1.17569	2.43613	2.95394	2.11877	1.42793	1.62399	1.40565	1.36129	1.49517	1.57775		1.76716	0.962202
240	1.51879	0.859865	3.67557	1.83339	2.48363	3.1108	3.25894	2.77279	2.48363	3.81232	1.0141	1.02285	1.9234	1.32607	1.68984	4.36625	3.16104	0.837375	0.865013	0.905652	1.29636	1.47229	1.09443	1.07457	0.90583	0.934529	0.857849	0.981423	1.491	5.32101	1.54963	3.42781	1.21868	2.38659	2.99941	1.85529	1.50158	1.67797	1.47997	1.40962	1.64463	1.6735		1.93275	1.08482
250	1.86262	0.88614	3.8489	2.01469	2.76221	3.6264	3.71117	3.34659	2.76221	4.05103	1.06412	1.19814	1.98546	1.37001	1.77703	3.88137	3.12566	0.883647	0.883182	0.890738	1.49564	1.7126	1.44318	1.25743	0.897525	1.0059	0.979158	1.02916	1.58644	5.41313	1.55974	3.73304	1.27319	2.35072	2.54575	2.43082	1.60015	1.78337	1.54124	1.49731	1.83415	1.79254		2.06413	1.10472
260	2.14849	0.954628	3.9936	2.17561	2.86154	3.93479	3.94345	3.58079	2.86154	3.95191	1.24869	1.58824	2.01634	1.38676	1.86207	3.52625	2.71125	0.867121	0.83162	0.934832	1.66952	1.94508	2.02086	1.52379	1.02123	1.37093	1.55352	1.16424	1.67972	5.46246	1.58368	3.83533	1.32508	2.3899	2.25822	2.59359	1.68611	1.85608	1.64243	1.53675	2.06608	1.90537		2.17785	1.06587
270	2.28502	0.994848	3.83226	2.24529	2.91865	3.87215	3.97046	3.57326	2.91865	3.69443	1.52533	2.06241	1.91736	1.43833	1.86976	3.43826	2.55916	0.869843	0.818116	1.12461	1.8076	2.16387	2.70932	1.83288	1.27437	1.86104	2.61731	1.3591	1.70476	4.89364	1.51411	3.26118	1.30569	2.27962	2.20514	2.05621	1.73917	1.82978	1.67627	1.56441	2.18429	1.98126		2.23212	0.941052
280	2.60782	0.974227	3.19155	2.2114	2.87306	3.89555	3.8632	3.79576	2.87306	3.34487	1.8912	2.58289	1.86496	1.53494	1.9679	3.17923	2.27182	0.902312	0.810995	2.09338	1.94376	2.25003	3.27728	2.15164	1.60447	2.37891	3.43783	1.60592	1.723	4.52584	1.50048	3.17002	1.35851	2.06611	2.01615	2.10682	1.88909	1.94184	1.75578	1.58665	2.35987	2.0688		2.32021	0.855498
290	2.64872	1.04826	2.99114	2.20334	2.74853	3.86458	3.87709	3.78321	2.74853	2.98006	2.25285	3.02312	1.67546	1.5089	1.80414	2.84425	2.05738	0.984358	0.901106	3.79725	2.08603	2.46174	3.50348	2.52847	1.89341	2.87882	4.21299	1.93924	1.77749	4.3948	1.45052	2.80169	1.33526	1.70915	1.87411	1.85122	1.85655	1.84019	1.75951	1.55042	2.40218	2.0972		2.37968	0.88969
300	2.81262	1.01429	2.79923	2.11115	2.42245	3.67252	3.634	3.37419	2.42245	2.61642	2.55932	3.23862	1.6313	1.47958	1.87738	2.66644	1.76507	1.27269	1.06144	5.06279	1.99251	2.4633	3.66217	2.80987	2.24264	3.24711	4.67344	2.24043	1.66076	3.99629	1.41848	2.58514	1.3781	1.53108	1.70134	1.81918	1.91978	1.8395	1.77863	1.63297	2.51036	2.05943		2.39658	0.934053
310	2.53043	1.08697	2.49049	2.07228	2.35191	3.17413	3.1293	2.83385	2.35191	2.35367	2.82479	3.35542	1.51713	1.44597	1.8581	2.3734	1.5638	2.17091	1.94143	5.60705	1.95768	2.45965	3.76815	3.09837	2.65148	3.60739	4.82339	2.43658	1.64397	3.44711	1.35262	2.59215	1.39847	1.43075	1.59272	1.57706	1.95164	1.81605	1.7647	1.60513	2.53284	2.08359		2.39582	0.926955
320	2.35285	1.08832	2.36474	1.94668	2.04286	2.83269	2.75579	2.47753	2.04286	2.0956	2.855	3.1495	1.49229	1.36591	1.78479	2.2088	1.41819	3.45799	3.46422	5.54653	1.87187	2.37349	3.72735	3.2875	2.96657	3.68381	4.5679	2.54663	1.64824	3.39862	1.31147	2.36282	1.4629	1.37312	1.28922	2.0763	1.9816	1.77893	1.71604	1.45879	2.40389	2.0509		2.38288	0.941641
330	2.24089	1.11109	2.09623	1.85733	1.85835	2.5243	2.52582	2.24751	1.85835	1.86217	2.94884	3.13818	1.49762	1.42416	1.7294	1.86458	1.30493	4.61305	4.78667	5.36842	1.85851	2.27751	3.48499	3.2305	3.3492	3.69879	4.28957	2.65368	1.67031	3.47564	1.25144	2.34777	1.42037	1.25911	1.22655	1.96999	2.04397	1.73625	1.75386	1.49502	2.38293	2.02182		2.37513	1.03725
340	2.16453	1.03625	1.91826	1.61844	1.59369	2.19594	2.20941	1.88115	1.59369	1.60528	2.87818	3.00014	1.36344	1.46579	1.6353	1.74125	1.15694	5.85987	5.77395	4.79585	1.7717	2.17668	3.38558	3.41032	3.41404	3.44327	3.77569	2.55053	1.68804	2.77326	1.1911	1.91138	1.38731	1.16168	1.20984	1.99568	2.01033	1.69754	1.71512	1.44021	2.25142	1.98323		2.2817	1.14582
350	1.84453	1.10576	1.77627	1.64664	1.54714	1.89993	1.93623	1.67873	1.54714	1.5044	2.81681	2.83007	1.31184	1.47355	1.58747	1.74472	0.971632	6.54988	6.42069	4.47077	1.61971	2.04971	3.22347	3.5131	3.47445	3.2063	3.39664	2.44022	1.58623	2.19237	1.11838	1.76062	1.37851	1.13763	1.02897	2.21185	1.90992	1.5562	1.63852	1.32584	2.16963	1.91085		2.2027	1.24439
360	1.75184	1.08703	1.52168	1.42481	1.4003	1.75744	1.79732	1.49806	1.4003	1.43519	2.69088	2.63912	1.2712	1.46624	1.50517	1.61413	0.947902	6.78474	6.1781	3.85929	1.62692	1.88961	2.88923	3.44273	3.36532	2.90167	3.07326	2.2933	1.55099	1.97038	1.09564	1.49086	1.34498	1.10115	1.1602	1.62436	1.92487	1.5279	1.62704	1.30295	2.01113	1.83589		2.07336	1.21786
370	1.56793	1.07922	1.37273	1.40514	1.38686	1.58879	1.6314	1.43616	1.38686	1.31202	2.55444	2.43893	1.19144	1.43654	1.41165	1.5646	0.836371	6.68247	5.91047	3.44667	1.53366	1.82057	2.68659	3.42536	3.3249	2.66692	2.9378	2.1884	1.53941	1.95964	1.02084	1.3863	1.26167	0.993772	1.11301	1.44278	1.81943	1.44859	1.56477	1.27667	1.96531	1.71422		1.96979	1.1839
380	1.45273	1.05607	1.30154	1.33878	1.26281	1.47864	1.47629	1.36674	1.26281	1.22991	2.42054	2.21612	1.10886	1.3788	1.33795	1.41618	0.862259	6.60043	5.65168	3.02345	1.44871	1.71193	2.46231	3.29711	3.27077	2.58991	2.68939	2.06346	1.38766	1.74503	1.01951	1.42941	1.27078	1.02507	0.979323	1.51348	1.80337	1.40183	1.56904	1.26026	1.87147	1.66787		1.87429	1.14307
390	1.33738	0.962812	1.12898	1.33357	1.2117	1.32169	1.31191	1.21953	1.2117	1.17302	2.24159	2.03421	1.08059	1.34268	1.28107	1.34172	0.765182	6.22364	4.73535	2.68778	1.36119	1.60566	2.3173	3.18544	3.30054	2.43589	2.46254	1.94366	1.46017	1.77087	0.977953	1.22317	1.25838	0.997296	1.06288	1.2706	1.70253	1.32044	1.52059	1.18	1.74238	1.5988		1.75344	1.03647
400	1.14273	0.990702	0.964546	1.19256	1.22442	1.23083	1.26561	1.12585	1.22442	1.12141	2.12579	1.92333	1.06661	1.28193	1.26386	1.19413	0.766908	6.01211	4.43261	2.39576	1.32379	1.46648	2.15888	3.02001	3.18631	2.18245	2.22732	1.87264	1.45554	1.59184	0.949225	1.13305	1.28214	1.00517	1.02897	1.21236	1.69389	1.28144	1.4929	1.14354	1.698	1.5434		1.66418	0.981615
410	1.11287	0.98268	1.00362	1.17265	1.16276	1.17713	1.20619	1.12919	1.16276	1.11144	1.96805	1.72523	1.07144	1.2344	1.20202	1.1408	0.689893	5.69209	4.07781	1.98854	1.27453	1.39939	1.93789	2.85875	3.00452	1.93865	1.97408	1.76006	1.48289	1.69671	0.936536	1.07262	1.23483	0.958739	1.0818	1.06333	1.64898	1.23635	1.42974	1.17826	1.55511	1.46187		1.57612	0.9027
420	1.12346	0.9115	0.76916	1.15464	1.12964	1.11518	1.1213	1.09824	1.12964	1.0827	1.77662	1.56805	0.964516	1.1306	1.1753	0.961676	0.675655	5.33805	3.53518	1.76116	1.1966	1.30035	1.78248	2.71205	2.95396	1.91268	1.87079	1.67765	1.43969	1.53664	0.894482	1.0155	1.18793	0.908366	1.10613	1.00025	1.60689	1.18237	1.38301	1.11144	1.53811	1.3762		1.48133	0.832784
430	1.00385	0.918984	0.732018	1.08449	1.10253	1.06562	1.08889	1.02715	1.10253	1.03343	1.69621	1.45055	0.983627	1.14446	1.11848	0.997996	0.623665	4.99839	3.0284	1.56965	1.12425	1.20883	1.65363	2.59591	2.86796	1.77721	1.78037	1.58361	1.36132	1.35005	0.884604	0.956719	1.17826	0.890332	1.03388	1.00941	1.5194	1.14004	1.32674	1.07745	1.42606	1.31939		1.40087	0.760891
440	0.987514	0.899009	0.726988	1.1025	1.04087	1.04703	1.10201	0.959395	1.04087	1.02229	1.61569	1.38457	1.02436	1.14651	1.08186	0.930308	0.600582	4.47929	2.60265	1.48082	1.07707	1.15908	1.5026	2.45793	2.68568	1.65331	1.68159	1.45574	1.29388	1.29787	0.862238	0.878144	1.12756	0.866493	0.974408	0.943286	1.45881	1.11014	1.25377	1.03274	1.33007	1.2315		1.32402	0.669485
450	0.938374	0.871603	0.827969	1.00178	1.00655	1.0429	1.14677	0.907536	1.00655	1.02933	1.52598	1.2911	0.998816	1.13888	1.02627	0.948138	0.572322	4.13166	2.43839	1.27764	1.05761	1.07903	1.378	2.27745	2.45137	1.53549	1.51652	1.32489	1.2053	1.15994	0.844526	0.860614	1.15821	0.905671	0.97662	0.966175	1.44582	1.0871	1.22406	0.965784	1.25858	1.21091		1.26234	0.600375
460	0.909243	0.835367	0.761422	1.05984	0.999836	0.980256	1.03487	0.898335	0.999836	0.991789	1.46546	1.26412	1.02487	1.18423	0.954266	0.937242	0.533492	3.67924	2.04725	1.19464	1.02444	1.06309	1.25587	2.15027	2.23963	1.42984	1.42417	1.28307	1.15949	1.11212	0.844024	0.867626	1.17369	0.920804	0.906581	0.9794	1.38707	1.06094	1.20423	0.922995	1.17782	1.18996		1.20316	0.517991
470	0.908066	0.822498	0.791214	1.04965	1.01999	0.964423	0.985478	0.925101	1.01999	1.00528	1.38025	1.20806	1.04921	1.16345	0.899854	0.896793	0.493151	3.33103	1.90092	1.15184	1.00901	1.04336	1.19247	2.01193	2.06394	1.31425	1.2842	1.16242	1.13728	1.09383	0.82658	0.944964	1.10426	0.846178	0.999966	0.872838	1.31612	1.0148	1.15759	0.920015	1.13663	1.12198		1.15574	0.455737
480	0.883054	0.808122	0.794696	1.07145	0.971763	0.96993	1.01712	0.879097	0.971763	0.953666	1.31795	1.15114	1.02205	1.11572	0.842249	0.876322	0.48862	2.97679	1.79902	1.06755	0.977905	1.00382	1.13811	1.89567	1.94441	1.20815	1.1822	1.10825	1.11137	0.987957	0.826479	0.865564	1.07119	0.817986	0.988908	0.759919	1.29719	1.00995	1.13861	0.92992	1.08173	1.08447		1.10495	0.405147
490	0.795661	0.821745	0.792761	1.05984	0.928094	0.957539	1.02175	0.821382	0.928094	0.931378	1.25958	1.11267	1.01984	1.04541	0.808103	0.840001	0.503506	2.77032	1.72585	1.0187	0.947658	1.00144	1.07965	1.80859	1.82236	1.11793	1.05606	1.1046	1.09835	1.04467	0.822461	0.878969	1.09475	0.844519	1.00488	0.776195	1.25069	0.972757	1.11754	0.894562	1.04158	1.04376		1.0711	0.369908
500	0.833914	0.787716	0.758327	0.893234	1.01543	0.930004	0.961555	0.797126	1.01543	0.948387	1.23284	1.06811	1.02909	1.06722	0.804845	0.816392	0.451084	2.49696	1.52648	1.00357	0.926787	0.975967	1.03241	1.67825	1.73876	1.07772	1.05317	1.07911	1.15711	0.999367	0.831702	0.858139	1.12169	0.857164	0.939266	0.84944	1.2442	0.984136	1.07343	0.909008	0.973147	0.985096		1.04245	0.324224
510	0.742843	0.799185	0.764131	0.987084	1.01951	0.911418	0.987793	0.839784	1.01951	0.958358	1.1862	1.05488	1.04116	1.07049	0.806734	0.792289	0.504584	2.25665	1.38063	0.917756	0.931627	0.934489	1.00845	1.60054	1.67072	1.11645	1.04448	1.06753	1.16065	0.966815	0.822126	0.83071	1.09943	0.851775	0.797958	1.00865	1.19132	0.950902	1.03504	0.873603	0.952778	0.966421		1.02199	0.28535
520	0.744902	0.766987	0.754845	0.961962	1.04063	0.903157	0.939947	0.801308	1.04063	0.950147	1.14998	1.02477	1.03241	1.027	0.763661	0.813256	0.468774	2.08576	1.30648	0.884902	0.904807	0.90433	0.98065	1.51639	1.58079	1.14835	1.07505	1.05394	1.0961	0.947519	0.824705	0.83731	1.08842	0.86442	0.846617	0.90056	1.1689	0.940772	1.00995	0.82976	0.94437	0.956591		0.997185	0.259958
530	0.756231	0.745773	0.813654	1.00107	1.04255	0.913483	0.947664	0.859022	1.04255	0.964223	1.11244	1.01084	1.01129	1.02379	0.82889	0.788822	0.45583	1.87734	1.19403	0.846428	0.898858	0.882734	0.926017	1.44644	1.44853	1.09686	1.03547	1.00425	1.07287	0.95658	0.810475	0.775852	1.04168	0.814462	0.811229	0.955748	1.11217	0.896852	0.970852	0.851269	0.905072	0.935174		0.973461	0.223373
540	0.701059	0.699414	0.711125	1.02524	1.01879	0.909353	0.969272	0.822219	1.01879	0.942522	1.09058	1.01067	0.962605	0.982347	0.813055	0.777265	0.47956	1.7951	1.15744	0.846644	0.887415	0.860618	0.938478	1.39148	1.44637	1.06986	1.03161	0.982854	1.02215	0.95205	0.833109	0.914235	1.04214	0.827314	1.0501	0.69532	1.12963	0.921067	0.983007	0.797062	0.911007	0.92938		0.960697	0.216769
550	0.708856	0.705229	0.725441	0.960777	1.04063	0.870803	0.90522	0.794616	1.04063	0.948974	1.06233	0.973937	1.00445	0.975226	0.786143	0.766534	0.48107	1.62653	1.0693	0.82222	0.84895	0.85533	0.922457	1.32696	1.34543	1.02222	1.02614	0.971472	1.0084	0.897014	0.816133	0.756672	1.04147	0.82607	1.08647	0.671668	1.09164	0.892342	0.947784	0.780093	0.896034	0.886907		0.933013	0.195132
560	0.692378	0.711637	0.711899	1.04088	0.930493	0.875622	0.947664	0.912554	0.930493	0.935484	1.06712	0.984381	1.01068	0.998705	0.783731	0.789647	0.461007	1.49977	0.938918	0.828056	0.857923	0.872681	0.877409	1.29587	1.20597	0.99967	0.99943	0.917556	0.984517	0.899531	0.816803	0.750279	1.05618	0.84908	0.872667	0.858087	1.08356	0.910312	0.95795	0.770187	0.897518	0.892132		0.920867	0.167992
570	0.648387	0.689238	0.589638	1.01339	0.992158	0.883194	0.94149	0.854003	0.992158	0.957185	1.0171	0.932333	1.04891	0.961562	0.71583	0.767029	0.467048	1.4255	0.927869	0.795202	0.865031	0.836043	0.841809	1.23839	1.12809	1.01837	0.931857	0.909751	0.943921	0.874362	0.802673	0.769459	1.06981	0.868773	0.97023	0.731434	1.03313	0.878812	0.955568	0.747394	0.878993	0.887528		0.900016	0.166508
580	0.649564	0.685254	0.562942	0.993957	0.980641	0.885948	0.91448	0.808836	0.980641	0.942522	1.04497	0.976374	1.03462	0.98132	0.724302	0.790638	0.472657	1.38778	0.973538	0.809683	0.845068	0.858458	0.863991	1.20318	1.13301	0.994921	0.939258	0.926791	0.869747	0.902887	0.805988	0.766159	1.09326	0.893026	1.02233	0.713123	1.02952	0.890746	0.941564	0.729417	0.889739	0.857782		0.899301	0.164641
590	0.6631	0.6908	0.538567	1.03377	1.03247	0.902469	0.947664	0.872405	1.03247	0.944282	1.04422	0.952003	1.06601	0.914282	0.676927	0.775614	0.446554	1.30554	0.899142	0.808603	0.831809	0.832469	0.894799	1.16457	1.14125	0.992547	0.91416	0.935311	0.844565	0.878389	0.811981	0.768221	1.06081	0.871468	0.955731	0.704985	1.05194	0.894979	0.937122	0.713182	0.882905	0.863369		0.892701	0.162761
600	0.659275	0.702106	0.629489	0.990402	1.01015	0.870115	0.913708	0.791271	1.01015	0.931965	1.02039	0.983162	1.05947	0.892535	0.674255	0.786675	0.453241	1.24061	0.902825	0.810332	0.79884	0.839469	0.899728	1.13658	1.09456	0.998186	0.89421	0.911767	0.840874	0.874866	0.806189	0.772552	1.03571	0.85364	1.02282	0.660478	1.04398	0.88582	0.917075	0.696351	0.861502	0.860317		0.881849	0.151629
610	0.71018	0.681646	0.641483	1.00912	0.975362	0.883882	0.955381	0.830583	0.975362	0.919648	0.999369	0.951307	1.07818	0.875471	0.665784	0.769671	0.438572	1.20911	0.878026	0.812709	0.789463	0.843416	0.877409	1.09516	1.08201	0.970141	0.908046	0.90819	0.877056	0.833924	0.789615	0.740173	1.03849	0.872297	0.867997	0.851984	1.0278	0.881379	0.910145	0.660992	0.858355	0.852298		0.876124	0.142082
620	0.672075	0.698391	0.663536	1.00296	0.966245	0.885948	0.928371	0.837275	0.966245	0.907331	1.0019	0.982988	1.06138	0.863795	0.665002	0.769836	0.421314	1.15875	0.840705	0.804928	0.836901	0.843863	0.854543	1.07845	0.968576	0.946844	0.856884	0.880224	0.902818	0.796842	0.767718	0.685315	1.01082	0.84908	0.768468	0.815107	0.993127	0.851753	0.881817	0.675393	0.830072	0.839572		0.857933	0.135981
630	0.679137	0.67917	0.638388	1.00604	0.971763	0.896273	0.957696	0.804654	0.971763	0.887977	1.01016	0.94887	1.06611	0.880731	0.662461	0.751675	0.42304	1.10918	0.776375	0.767751	0.831356	0.838873	0.851531	1.04514	0.998289	0.913458	0.814088	0.912157	0.910923	0.712275	0.780508	0.729655	0.983822	0.835606	0.843914	0.770346	1.03405	0.889012	0.881568	0.64806	0.855432	0.831243		0.852393	0.137707
640	0.630438	0.674324	0.634132	1.01505	1.01687	0.903157	0.936088	0.854003	1.01687	0.914956	0.995897	0.958792	1.03804	0.880026	0.681554	0.751675	0.451947	1.07088	0.767045	0.786988	0.837809	0.839543	0.896442	1.02772	0.99103	0.863897	0.824063	0.907865	0.911574	0.678046	0.768119	0.695833	0.987525	0.830216	0.762324	0.876399	1.01733	0.863478	0.845599	0.604492	0.792888	0.823483		0.8482	0.138855
650	0.614842	0.681216	0.664697	0.953904	0.955207	0.886636	0.948436	0.822219	0.955207	0.909091	0.982572	0.955485	1.03613	0.861229	0.706056	0.749859	0.464675	1.09323	0.829165	0.761267	0.821424	0.846841	0.873302	1.03201	0.940463	0.971625	0.89421	0.913913	0.863307	0.642139	0.763934	0.684284	0.984953	0.820059	0.768713	0.916328	1.02548	0.850851	0.837922	0.595549	0.787087	0.802531		0.844477	0.135162
660	0.619109	0.661294	0.6144	1.01007	0.969364	0.88939	0.94612	0.798799	0.969364	0.928446	0.989328	0.954615	1.03724	0.890418	0.73173	0.757289	0.448711	1.06757	0.820326	0.75716	0.845068	0.837012	0.853585	1.01071	0.915057	0.934529	0.871042	0.910141	0.866998	0.675194	0.736378	0.671704	0.992616	0.851153	0.737749	0.835961	0.998396	0.830521	0.835647	0.540241	0.747429	0.784269		0.836718	0.139839
670	0.573353	0.619297	0.559847	1.02974	0.939371	0.90178	0.969272	0.860695	0.939371	0.906158	0.976003	0.94417	1.02668	0.855905	0.691524	0.761251	0.453026	1.02383	0.795527	0.76105	0.842396	0.834778	0.834689	1.00581	0.856493	0.939722	0.856562	0.878598	0.931547	0.691637	0.75476	0.678303	0.981302	0.863591	0.835804	0.752798	1.01328	0.856262	0.841156	0.576929	0.767663	0.793892		0.832758	0.139683
680	0.592921	0.633296	0.558299	1.01173	0.98424	0.888701	0.987793	0.818037	0.98424	0.923754	0.951699	0.93477	1.06591	0.852505	0.709509	0.771322	0.430806	1.00166	0.772938	0.746136	0.850966	0.821746	0.856871	0.981523	0.863629	0.899213	0.862997	0.868647	0.942763	0.770667	0.745854	0.686965	0.977857	0.853433	0.760849	0.954985	1.03197	0.867919	0.844781	0.543222	0.781197	0.809774		0.83805	0.142252
690	0.582033	0.653002	0.5819	0.993246	1.03439	0.89765	0.935316	0.827237	1.03439	0.946041	0.986138	0.980377	1.07757	0.831271	0.683053	0.775449	0.43512	0.958889	0.738072	0.71566	0.846076	0.799927	0.844821	0.979971	0.817738	0.91509	0.836612	0.879899	0.914107	0.71194	0.709056	0.66861	0.926585	0.805548	0.838507	0.826806	0.973338	0.821224	0.825446	0.565281	0.78938	0.787166		0.827379	0.141425
700	0.589978	0.662586	0.587704	0.990876	1.02695	0.883882	0.953838	0.842293	1.02695	0.941935	0.978818	0.987862	1.05876	0.846026	0.661418	0.764057	0.429943	0.965305	0.768764	0.714795	0.852479	0.818618	0.824283	0.977763	0.805558	0.870723	0.820845	0.8732	0.933862	0.701537	0.70765	0.699545	0.930597	0.822339	0.82966	0.825025	1.01151	0.865837	0.845137	0.612288	0.798103	0.818672		0.831618	0.138424
710	0.618079	0.633996	0.487109	1.0442	0.981121	0.871492	0.922197	0.824728	0.981121	0.925513	0.964555	0.943996	1.09779	0.821391	0.641934	0.738303	0.407292	0.958694	0.815906	0.716957	0.83428	0.813778	0.832772	0.956278	0.798545	0.893871	0.825993	0.859477	0.990306	0.78409	0.713108	0.677066	0.917432	0.823168	0.773629	0.903611	0.999009	0.840582	0.818053	0.532215	0.757726	0.794564		0.822284	0.14746
720	0.58321	0.65661	0.507615	1.02856	0.995038	0.853594	0.868177	0.792944	0.995038	0.926686	0.984073	0.945389	1.09799	0.844229	0.669955	0.718161	0.425197	0.944696	0.783005	0.722793	0.811039	0.820852	0.832772	0.945535	0.79227	0.923103	0.844335	0.886012	0.933935	0.739458	0.732427	0.67686	0.945304	0.847836	0.89331	0.777976	1.00881	0.862854	0.850468	0.593669	0.77805	0.811067		0.825021	0.14231
730	0.583357	0.65451	0.538567	1.05012	0.966005	0.906599	0.960011	0.859022	0.966005	0.917889	0.975065	0.963318	1.10212	0.794256	0.62851	0.740779	0.419157	0.917088	0.780549	0.729277	0.798789	0.821671	0.830581	0.938254	0.776583	0.876213	0.800252	0.882435	0.9246	0.772177	0.760385	0.7245	0.969269	0.872919	0.821796	0.938454	0.994475	0.839055	0.84631	0.615957	0.779309	0.803824		0.829524	0.140052
740	0.608957	0.658709	0.57068	1.02761	0.957847	0.894208	0.955381	0.843966	0.957847	0.882698	0.951418	0.970629	1.09538	0.771161	0.604204	0.682171	0.412253	0.926809	0.777112	0.703556	0.80746	0.815937	0.814698	0.940462	0.760159	0.808253	0.772257	0.866306	0.903759	0.7309	0.765106	0.729037	0.973588	0.867944	0.845142	0.834181	1.02045	0.862299	0.858643	0.617333	0.808625	0.801703		0.820401	0.13791
750	0.587624	0.656233	0.575323	1.00984	0.891863	0.885259	0.969272	0.787088	0.891863	0.903226	0.966807	0.978288	1.08572	0.717916	0.564975	0.752171	0.416784	0.904839	0.773183	0.728845	0.794454	0.810948	0.853174	0.923513	0.802174	0.840007	0.789633	0.876386	0.874017	0.733082	0.747059	0.723262	0.950653	0.859859	0.870701	0.671923	1.01022	0.847381	0.853987	0.663056	0.816898	0.811067		0.813585	0.134882
760	0.578649	0.621935	0.566811	1.04799	0.917297	0.891455	0.99088	0.797962	0.917297	0.904985	0.980695	0.996218	1.07788	0.714387	0.573902	0.700331	0.40988	0.898423	0.759188	0.736194	0.792891	0.782129	0.830308	0.936583	0.784888	0.829175	0.74909	0.890825	0.870833	0.75523	0.731054	0.70532	0.98881	0.884527	0.874141	0.703204	0.990921	0.839749	0.833123	0.676127	0.797744	0.803566		0.812681	0.141619
770	0.574088	0.646487	0.531603	0.979263	0.989519	0.888701	0.969272	0.797126	0.989519	0.91261	0.928052	0.933029	1.06229	0.73684	0.578985	0.752006	0.426491	0.891424	0.744947	0.740517	0.811896	0.799629	0.837975	0.936523	0.780336	0.803208	0.77644	0.879443	0.925323	0.782412	0.726668	0.731305	0.960475	0.857579	0.993331	0.692523	0.99472	0.842525	0.836464	0.639071	0.815864	0.807342		0.816758	0.139628
780	0.576295	0.624358	0.563329	1.04254	0.954727	0.882506	0.933773	0.824728	0.954727	0.880938	0.91529	0.924848	1.06581	0.796308	0.610329	0.776274	0.433826	0.889091	0.78325	0.729709	0.782153	0.775651	0.827432	0.927153	0.762373	0.844162	0.763248	0.886142	0.930823	0.766304	0.738186	0.770696	0.949161	0.84597	0.93902	0.687436	0.989451	0.844675	0.840516	0.640768	0.812132	0.808791		0.816545	0.132672
790	0.511265	0.606051	0.610918	0.980922	0.926894	0.861854	0.946892	0.757813	0.926894	0.870968	0.9456	0.950089	1.09749	0.819531	0.629162	0.777595	0.436415	0.897646	0.801174	0.736194	0.815476	0.817725	0.81374	0.92781	0.749332	0.86642	0.783519	0.895573	0.930606	0.747008	0.729246	0.755228	0.960475	0.877065	1.05108	0.618006	1.00795	0.851475	0.840765	0.680988	0.821439	0.809825		0.820051	0.139299
800	0.554079	0.611328	0.536246	0.992298	0.883225	0.852217	0.908306	0.784579	0.883225	0.884457	0.949447	0.945389	1.09256	0.800735	0.613001	0.776274	0.435767	0.868677	0.779322	0.693397	0.819105	0.785629	0.823872	0.924826	0.741273	0.84431	0.793816	0.855184	0.898042	0.731739	0.76899	0.77049	0.939853	0.840374	0.89503	0.70295	1.00256	0.843704	0.840587	0.642281	0.810064	0.79922		0.807582	0.130681
810	0.570704	0.607721	0.654638	0.965517	0.910098	0.848775	0.865862	0.775378	0.910098	0.882111	0.958362	0.975677	1.09508	0.75461	0.589802	0.778751	0.442239	0.868871	0.766799	0.736194	0.817845	0.761129	0.857418	0.923035	0.763911	0.855588	0.787702	0.884776	0.892615	0.696839	0.727036	0.721819	0.967109	0.869395	0.949341	0.642421	0.993127	0.830313	0.830564	0.664982	0.77198	0.786235		0.808392	0.130843
820	0.530539	0.611813	0.557138	0.993957	1.00488	0.863231	0.910622	0.765341	1.00488	0.865689	0.954139	0.956529	1.09789	0.753969	0.593843	0.760095	0.42153	0.857984	0.765326	0.734032	0.796823	0.773044	0.841535	0.931391	0.769878	0.907671	0.820202	0.889979	0.854189	0.693483	0.730418	0.71955	0.965463	0.855091	0.769205	0.760936	0.996068	0.835239	0.838348	0.648289	0.804758	0.809567		0.80987	0.140131
830	0.516415	0.591675	0.544371	1.01932	0.939611	0.86805	0.897502	0.841457	0.939611	0.88563	0.951605	0.97707	1.1165	0.746335	0.584589	0.73335	0.414842	0.856039	0.780058	0.74203	0.782657	0.7583	0.797446	0.920887	0.701226	0.853955	0.771292	0.888028	0.841308	0.698684	0.748365	0.713775	0.993644	0.901733	0.76429	0.802391	1.01586	0.849671	0.851925	0.648106	0.787807	0.803152		0.805728	0.143614
840	0.536718	0.604544	0.544757	1.02974	0.958087	0.865985	0.913708	0.807163	0.958087	0.879179	0.973657	0.990125	1.09518	0.756406	0.594103	0.732029	0.422392	0.844763	0.810259	0.74592	0.764206	0.755991	0.814287	0.933121	0.732169	0.899213	0.793816	0.875736	0.760911	0.681905	0.747193	0.690471	1.0244	0.922255	0.848092	0.660224	1.02045	0.85314	0.859994	0.669752	0.818247	0.805532		0.809379	0.146207
850	0.520534	0.611436	0.533537	1.03472	0.929534	0.879752	0.938403	0.761995	0.929534	0.895015	0.94757	0.985599	1.10413	0.774818	0.617106	0.764388	0.427786	0.848068	0.770237	0.756079	0.772877	0.754651	0.853448	0.917724	0.778306	0.909748	0.821167	0.908515	0.777555	0.707577	0.739191	0.692327	1.04301	0.928681	0.794763	0.778484	1.02511	0.850851	0.856973	0.65448	0.810738	0.800462		0.814449	0.144049
860	0.56276	0.624466	0.462734	1.02169	0.997677	0.830189	0.844254	0.798799	0.997677	0.909091	0.965587	0.982292	1.09286	0.802146	0.622189	0.757949	0.423902	0.83582	0.746911	0.730358	0.781901	0.781533	0.817163	0.925781	0.710638	0.907968	0.81441	0.891475	0.783996	0.73627	0.748599	0.707795	1.00604	0.924535	0.786162	0.901322	1.02768	0.843635	0.846381	0.637879	0.792933	0.78877		0.813624	0.146217
870	0.542897	0.616658	0.552496	1.02097	1.0044	0.868738	0.922969	0.80549	1.0044	0.88739	0.905719	0.924674	1.07828	0.826459	0.654771	0.757123	0.429943	0.807823	0.724568	0.70723	0.795109	0.778853	0.820449	0.916769	0.72048	0.879774	0.819558	0.872094	0.842538	0.74231	0.720306	0.692327	0.994621	0.890332	0.657388	0.917599	1.06603	0.861952	0.836216	0.617883	0.792033	0.785201		0.81102	0.143162
880	0.543927	0.628881	0.550561	1.05155	0.972243	0.865985	0.93686	0.787088	0.972243	0.878592	0.948415	0.993433	1.04257	0.816324	0.67393	0.759105	0.435552	0.825515	0.73488	0.715227	0.80383	0.792629	0.760065	0.909308	0.672559	0.854401	0.769361	0.876126	0.80831	0.595157	0.732896	0.72285	1.00162	0.913549	0.600127	0.936928	1.0653	0.865421	0.835185	0.623524	0.8017	0.789288		0.806262	0.148153
890	0.550989	0.620158	0.503359	1.01481	0.991199	0.861166	0.920654	0.790434	0.991199	0.87566	0.930492	0.97324	1.04388	0.836146	0.65816	0.709741	0.402761	0.819099	0.733898	0.702691	0.79279	0.792778	0.826884	0.924945	0.716051	0.848762	0.766787	0.873655	0.817211	0.65422	0.728108	0.707176	0.978628	0.868773	0.614627	0.870041	1.05219	0.827191	0.811087	0.604171	0.806512	0.774854		0.799695	0.146581
900	0.661776	0.60379	0.567585	0.952483	0.958566	0.885948	0.889785	0.787088	0.958566	5.78006	0.863586	0.903089	1.8213	1.29213	1.11842	1.67406	1.93593	0.726749	0.717693	0.635902	0.779078	0.70997	0.779646	0.851596	0.614242	0.768931	0.688596	0.829819	0.843913	0.723014	0.769693	1.1811	4.00075	1.2504	4.13282	2.99288	2.69284	1.10854	1.45253	1.11208	2.70492	2.80609		1.39352	1.12763
910	2.01431	0.760256	0.614787	1.06695	0.927614	0.921743	0.942262	0.81971	0.927614	11.3748	0.85561	0.888467	3.5718	1.9799	1.82089	6.36951	6.06472	0.734915	0.733653	0.630931	0.786892	0.699173	0.791421	0.874753	0.606244	0.767595	0.698249	0.826567	0.8628	0.791641	0.793733	1.8097	4.67474	1.47117	3.84824	3.44634	3.56025	1.32675	1.99839	1.44439	3.86152	4.05859		2.00047	2.12096
920	4.52091	0.96825	0.602019	1.08212	0.879626	0.885948	0.925284	0.823055	0.879626	12.7326	0.890048	0.938078	5.99984	2.78147	2.69591	8.19942	6.23126	0.718	0.678899	0.637199	0.788606	0.715332	0.794296	0.875051	0.61621	0.768486	0.680873	0.83138	0.882266	0.827045	0.867562	2.32137	4.3886	1.36794	3.10312	2.89802	4.16758	1.58403	2.62882	1.96826	4.69244	5.12041		2.3085	2.49635
930	6.71972	1.21469	0.642644	1.03519	0.82084	0.899715	0.895187	0.841457	0.82084	13.1372	1.00312	1.05941	8.52172	3.7284	3.79243	7.97621	5.74436	0.723055	0.703206	0.629417	0.779431	0.720172	0.790873	0.861921	0.60323	0.75068	0.662532	0.835803	0.946454	0.842985	0.879683	2.34364	4.12675	1.29808	2.38601	2.56384	4.40664	1.56862	3.15154	2.40935	4.68529	4.93831		2.46335	2.69571
940	7.01956	1.41035	0.630263	0.996801	0.958087	0.892143	0.91448	0.75614	0.958087	12.8645	1.07951	1.17795	9.66387	4.40828	4.43267	7.45154	5.15586	0.700502	0.719657	0.610613	0.78306	0.724119	0.812507	0.855774	0.630297	0.76626	0.688274	0.846274	0.963821	0.866476	0.859158	2.20732	3.63445	1.2218	1.82397	2.05214	4.37546	1.51763	3.41517	2.60467	4.55935	4.79408		2.4715	2.71427
950	7.16051	1.66567	0.718089	1.02405	0.920656	0.888701	0.901361	0.873242	0.920656	12.5783	1.1284	1.30137	9.45797	4.6627	4.70832	7.82168	5.06655	0.717222	0.74421	0.62142	0.771566	0.696269	0.802101	0.856908	0.615164	0.762105	0.695032	0.850957	1.00673	0.798185	0.856781	2.1205	3.26238	1.10965	1.58879	1.83825	4.00412	1.43714	3.50712	2.62136	3.8398	4.35161		2.43509	2.67648
960	7.65544	1.9974	0.684042	1.07904	0.909858	0.885259	0.919882	0.802144	0.909858	11.1707	1.15242	1.30729	8.74552	4.35606	4.41169	7.27588	4.56456	0.685531	0.717693	0.604993	0.768239	0.701854	0.773484	0.851417	0.561337	0.749047	0.666072	0.835152	1.04053	0.870335	0.876636	2.14545	2.96679	1.0514	1.53571	1.5852	3.72193	1.35693	3.41996	2.54867	3.51192	3.75958		2.31269	2.46019
970	6.8539	2.12576	0.64187	1.05392	0.852752	0.920367	0.950751	0.908372	0.852752	10.2176	1.12445	1.25855	7.60116	4.19093	4.15266	6.64126	3.97886	0.678532	0.707626	0.620555	0.768794	0.694928	0.782932	0.85649	0.557462	0.777389	0.691814	0.833331	1.1092	0.809427	0.83408	2.02068	2.62697	1.0002	1.43716	1.43566	3.45567	1.28318	3.22466	2.48029	3.34025	3.43149		2.16154	2.19868
980	5.28332	2.11122	0.682494	1.04183	0.952088	0.878375	0.902904	0.862368	0.952088	8.7783	1.04957	1.17621	6.52942	3.82873	3.69423	5.8493	3.18714	0.668228	0.723831	0.602399	0.76592	0.682641	0.773621	0.844435	0.581269	0.770266	0.668646	0.816812	1.31247	0.851207	0.821122	1.9287	2.3629	0.97242	1.31895	1.40132	3.14382	1.21109	2.91128	2.31203	2.93135	2.93408		1.95406	1.8329
990	5.041	2.23053	0.581126	1.03448	0.963845	0.91486	0.933001	0.848985	0.963845	7.40235	0.99402	1.10641	5.81234	3.46949	3.30931	4.50312	2.47913	0.667256	0.708117	0.617962	0.767634	0.695598	0.765542	0.836557	0.563552	0.756318	0.669933	0.820584	1.3289	0.807917	0.817539	1.74989	2.27388	0.970969	1.09532	1.27899	2.90745	1.13061	2.51931	2.03063	2.66355	2.60045		1.77696	1.55015
1000	3.9427	2.23667	0.63181	1.05866	1.03367	0.900404	0.966185	0.887461	1.03367	6.36481	0.910317	0.987862	5.50003	3.05655	2.76772	4.1546	2.12836	0.64062	0.70738	0.609532	0.766979	0.675269	0.739527	0.827425	0.540545	0.711358	0.646444	0.801463	1.49201	0.854395	0.810341	1.73505	2.14835	0.971798	1.04445	1.32172	2.68659	1.0846	2.21624	1.81962	2.33788	2.29378		1.64392	1.3286
1010	3.34993	2.27991	0.572227	1.10155	1.00799	0.878375	0.915252	0.8172	1.00799	5.38592	0.844537	0.88133	5.30127	2.60171	2.31561	3.4929	1.79377	0.673672	0.72997	0.579488	0.780993	0.72814	0.794296	0.85285	0.553033	0.656752	0.652557	0.773366	1.73298	0.833253	0.752751	1.48757	1.97433	0.986724	1.07271	1.21872	2.56706	1.08578	1.93993	1.61361	2.03739	1.99228		1.51471	1.14637
1020	2.70875	2.08591	0.627941	1.06743	0.994558	0.894897	0.937632	0.842293	0.994558	4.37537	0.813852	0.848604	4.74563	2.38533	2.03567	2.4358	1.01542	0.655007	0.710327	0.582081	0.77812	0.71429	0.77143	0.840137	0.563921	0.721596	0.630355	0.775187	1.76352	0.799359	0.726668	1.43291	1.86932	0.99771	1.0501	1.24847	2.45617	1.03909	1.7041	1.50121	1.81406	1.67144		1.37205	0.933534
1030	2.45245	2.03396	0.637614	1.08164	0.954967	0.912795	0.946892	0.839784	0.954967	3.64223	0.753984	0.787157	4.28012	2.10153	1.73311	1.68892	0.716859	0.649952	0.731688	0.602399	0.775448	0.682045	0.754862	0.831126	0.541775	0.702751	0.638721	0.751253	1.90441	0.811105	0.753956	1.45539	1.92244	1.0856	1.09458	1.23779	2.34184	1.01078	1.47396	1.38844	1.60187	1.48163		1.27964	0.798225
1040	2.20793	2.167	0.739756	1.09729	0.9852	0.905911	0.960783	0.903353	0.9852	2.7654	0.775097	0.83816	3.70749	1.90471	1.57398	1.35988	0.556143	0.643536	0.704434	0.584675	0.772474	0.677354	0.740896	0.828201	0.518522	0.687764	0.626172	0.746701	2.11905	0.801205	0.7787	1.37929	2.03604	1.82191	1.13292	1.31943	2.22899	1.00918	1.35802	1.23898	1.58694	1.45354		1.24353	0.684279
1050	1.84747	1.95018	0.726988	1.09492	0.834277	0.883882	0.877438	0.872405	0.834277	2.26334	0.791237	0.879763	3.26662	1.61193	1.34056	1.01764	0.462518	0.646453	0.695104	0.593753	0.767382	0.701481	0.696807	0.809043	0.488687	0.724119	0.640652	0.77896	2.36581	0.79852	0.802204	1.4026	2.06782	2.9353	1.14963	1.36623	2.18194	1.00724	1.24833	1.13662	1.49382	1.454		1.20257	0.660727
1060	1.54571	1.84701	0.744012	1.08638	0.937452	0.915548	0.949979	0.891643	0.937452	1.87507	0.781572	0.843904	2.82676	1.45707	1.16527	0.855025	0.415921	0.641398	0.709345	0.579055	0.76834	0.682939	0.753082	0.820681	0.528734	0.735099	0.656097	0.791317	2.71772	0.845166	0.79745	1.42734	2.15221	4.12061	1.23147	1.37513	2.00647	0.989687	1.15443	1.07392	1.40331	1.37459		1.20027	0.717405
1070	1.55542	1.72091	0.762196	0.988269	0.936492	0.873557	0.85583	0.851494	0.936492	1.5607	0.770312	0.829108	2.49493	1.38406	1.08101	0.752831	0.394132	0.637898	0.713273	0.606722	0.776305	0.683832	0.773621	0.81531	0.533778	0.707054	0.663498	0.791577	2.86382	0.819159	0.811713	1.47292	2.22302	4.91703	1.17126	1.45422	1.81734	0.959297	1.11402	0.958308	1.42211	1.34345		1.18567	0.790203
1080	1.42978	1.77691	0.792375	1.00107	0.890663	0.934823	0.983934	0.916736	0.890663	1.40587	0.787202	0.863226	2.20343	1.27103	0.995516	0.698515	0.374717	0.639453	0.709836	0.580568	0.743839	0.639971	0.777318	0.800569	0.533348	0.767595	0.671864	0.77896	2.98452	0.865134	0.825876	1.51499	2.33199	5.28768	1.04715	1.71261	1.66461	0.933348	1.05587	0.946339	1.34855	1.26337		1.18195	0.831912
1090	1.42904	1.60741	0.803595	1.03709	0.851792	0.890766	0.904448	0.868223	0.851792	1.22933	0.833652	0.922237	1.98808	1.18051	0.935564	0.684647	0.383777	0.659285	0.709345	0.600238	0.727153	0.627833	0.715976	0.794302	0.489917	0.743705	0.668968	0.767318	3.30235	0.873859	0.818745	1.5781	2.38537	5.9106	1.04764	1.54705	1.55629	0.92745	1.02427	0.906256	1.21919	1.15607		1.17046	0.919099
1100	1.40506	1.52014	0.782702	1.0013	0.865469	0.902469	0.929914	0.837275	0.865469	1.13783	0.817418	0.905178	1.77654	1.14843	0.868706	0.674906	0.380326	0.635176	0.703452	0.576462	0.738647	0.659407	0.727751	0.79651	0.505111	0.748305	0.657706	0.775448	3.75108	1.094	0.813488	1.66348	2.44683	6.09157	1.06779	1.78942	1.46298	0.914683	1.00966	0.852278	1.18043	1.13942		1.18143	0.96952
1110	1.53115	1.52084	0.744399	0.962199	0.935532	0.903846	0.898274	0.848985	0.935532	1.05396	0.881884	1.00544	1.46322	1.10571	0.851177	0.720968	0.375795	0.637704	0.742983	0.612774	0.74631	0.666109	0.762804	0.830827	0.538207	0.735693	0.667681	0.791057	4.21472	1.16582	0.827617	1.66266	2.53569	6.47299	1.12677	1.53332	1.42542	0.932376	0.993599	0.816873	1.12984	1.06844		1.19946	1.04136
1120	1.89852	1.6555	0.773416	1.00178	0.94249	0.91486	0.915252	0.900008	0.94249	1.01232	0.981633	1.17691	1.31174	1.05355	0.832214	0.712548	0.391544	0.632843	0.723831	0.589647	0.7329	0.650248	0.747742	0.813042	0.520614	0.742667	0.668003	0.796	4.80261	1.85628	0.852261	1.62739	2.63777	7.05673	1.14521	1.80595	1.38002	0.933903	0.985247	0.796695	1.10084	1.03347		1.26306	1.16862
1130	2.28959	1.76076	0.784636	1.04325	1.02407	0.930004	0.969272	0.900844	1.02407	0.965982	1.18639	1.55795	1.19928	1.01256	0.794809	0.660048	0.35789	0.664145	0.700015	0.568032	0.740915	0.670875	0.749385	0.827545	0.520368	0.765518	0.649983	0.772131	4.74197	3.2612	0.838935	1.3531	2.80465	7.53268	1.21672	1.84664	1.49588	0.98143	0.954466	0.799217	1.0651	1.02524		1.33351	1.26842
MAX	7.65544	2.27991	3.9936	2.24529	2.91865	3.93479	3.97046	3.79576	2.91865	13.1372	2.94884	3.35542	9.66387	4.6627	4.70832	8.19942	6.23126	6.78474	6.42069	5.60705	2.08603	2.4633	3.76815	3.5131	3.47445	3.69879	4.82339	2.65368	4.80261	5.46246	1.58368	3.83533	4.67474	7.53268	4.13282	3.44634	4.40664	1.94184	3.50712	2.62136	4.69244	5.12041		4.51603	2.24588

## Sheet: Endogenous_C17_-TG
	cell1	cell2	cell3	cell4	cell5	cell6	cell7	cell8	cell9	cell10	cell11	cell12	cell13	cell14	cell15	cell16	cell17	cell18	cell19	cell20	cell21	cell22	cell23	cell24	cell25	cell26	cell27	cell28	cell29	cell30	cell31	cell32	cell33	cell34	cell35	cell36	cell37	cell38	cell39	cell40	cell41	cell42	cell43		Average	Std. Err.
Time [s]	1.02523	1.00001	0.98294	1.06107	0.96349	1.00646	1.00356	1.05461	0.992682	1.03969	1.005	1.0039	1.00109	1.01306	0.981568	0.949463	1.06226	0.964083	0.938984	1.06682	0.993959	0.902522	1.01408	0.888826	0.783332	0.981001	1.03191	0.934694	0.966283	1.05121	1.00957	1.00129	1.00571	0.993397	1.0231	1.06418	0.985748	0.983876	1.02447	0.9796	0.953339	0.968993	0.937945		0.990581	0.0523345
0	1.00616	0.981357	0.977458	0.987801	0.956	0.982948	1.00807	1.05107	1.02451	0.997046	1.02085	1.00757	0.962338	1.03106	1.00932	0.951773	1.04885	0.970781	0.951699	0.980715	1.02531	0.907154	1.01904	0.900512	1.01597	0.982705	1.02705	0.922111	0.949496	1.06145	1.05173	0.985715	1.02011	1.04048	1.00503	1.06837	0.980998	0.981987	0.977434	0.990115	0.970825	0.979301	0.967373		0.993898	0.0386199
10	0.992707	0.994143	0.974952	0.981832	0.927061	0.981308	1.01409	1.04289	1.01196	1.04556	0.981088	0.99157	0.997478	1.02291	1.04937	0.974413	1.04432	0.962179	0.975221	0.955905	0.912598	0.944783	1.00624	0.907483	1.02209	0.988891	1.02286	0.896499	0.999067	1.04865	1.0271	1.00481	0.977882	1.00581	0.984773	1.04607	0.959857	0.949601	1.03826	0.899549	0.976866	0.994191	1.0051		0.989302	0.0406764
20	1.01193	0.955676	0.987116	0.944236	1.00843	1.00318	1.01811	1.03403	1.01032	1.02972	1.00974	1.00612	0.967533	1.02358	0.989864	1.02339	1.03236	0.968877	0.961235	0.923069	0.956045	0.970834	1.05746	0.936672	1.01225	0.97431	1.02383	0.941119	0.988927	1.01686	1.01894	0.992179	1.01459	1.04561	1.0075	1.06636	0.970784	0.973828	1.02259	0.948394	0.965261	0.995909	1.04811		0.996671	0.0345245
30	1.00472	0.966164	0.988278	0.919126	1.00503	1.0234	0.997261	1.00163	1.00214	1.03925	0.983917	1.00001	0.968111	1.00639	1.01218	1.04048	1.02711	0.967961	0.988572	0.997498	0.97285	0.989359	1.06661	0.956884	0.999651	0.988954	1.0346	0.991272	0.988814	1.02316	0.997788	0.990416	0.986999	1.07429	1.01503	1.05495	0.98076	0.881124	0.989767	0.965014	0.978376	0.993619	0.954545		0.995676	0.0347815
40	0.958587	0.944539	1.03984	0.913157	0.962809	0.996069	0.99795	1.0067	1.01487	0.997711	0.99085	0.977637	1.00736	1.01913	1.03621	1.05665	1.01941	0.988339	1.01178	1.00407	1.00277	1.00557	1.03342	0.973184	1.01369	0.984725	1.0269	0.980295	1.01473	1.01922	0.962588	1.01715	1.00763	1.00838	1.0179	1.05797	0.972447	0.917607	1.0067	1.01284	0.994909	0.968993	0.922853		0.996887	0.0329368
50	0.938563	0.998225	1.00654	1.01435	1.01967	1.01739	0.987801	0.991899	0.974312	0.975557	1.00231	0.982247	0.994808	0.998091	1.0076	1.03124	0.990913	0.986834	0.990479	0.925988	1.02327	1.01599	1.03159	0.970627	0.991253	0.989333	0.987461	1.04241	0.990504	0.982114	0.951747	1.04095	1.01315	0.998961	1.03611	1.04204	0.982185	0.957012	1.0113	0.998595	0.976389	0.983883	0.949263		0.995371	0.0270033
60	0.999916	0.974355	1.04096	0.871375	1.03362	1.05785	0.993446	0.991978	1.02233	0.992726	0.983988	0.99706	1.00419	1.01928	0.999305	1.0488	0.996639	0.998445	1.03911	1.09893	1.04663	0.985307	1.00075	0.963304	0.997732	0.990469	1.01926	1.00475	1.06835	0.985067	0.9658	0.999818	1.0345	1.01522	1.03789	1.03098	0.97601	0.936775	0.946289	1.05626	1.01677	0.994764	0.947754		1.0043	0.0394477
70	1.00136	0.992386	1.03145	0.922213	0.994472	1.04199	1.0003	0.993805	1.00741	0.988295	0.988091	1.02575	0.975903	1.03847	0.994728	1.0391	0.9813	1.00369	1.04897	1.01063	1.00605	1.04899	1.07001	0.972532	1.01057	0.97633	0.985814	1.06329	1.00436	0.973846	0.988687	0.994236	1.01171	0.98398	1.02529	1.03416	0.988124	0.890993	0.930402	1.06101	1.02893	0.985601	0.887388		1.00006	0.0398718
80	0.995751	1.01382	1.03671	0.955899	1.02988	1.03488	1.0051	0.984137	1.01378	0.989735	0.983917	1.01001	0.967461	1.05151	1.02105	0.987349	0.987652	1.00554	1.01337	1.05952	0.998468	0.936099	1.01695	0.963254	1.01537	0.991668	0.977508	0.936389	1.03872	0.996288	0.98949	0.995999	0.992277	1.0011	1.02721	1.03366	0.945606	0.940908	0.999383	0.964675	1.04498	0.981019	0.894934		0.996024	0.0342817
90	1.002	0.999252	1.03813	0.997337	1.01456	1.01192	1.00305	0.970696	1.03815	1.00458	0.993256	1.00229	0.998632	1.05366	1.01533	1.02616	0.984144	1.00437	0.977764	0.942041	1.00154	0.912943	0.964418	0.972282	1.00025	1.01408	1.00819	0.969586	1.04041	0.99363	0.968209	1.01451	1.00859	1.03063	1.01763	1.00935	1.00095	1.00429	1.00879	0.981974	0.971302	0.981019	0.879842		0.996087	0.0318609
100	1.00168	1.00442	0.993506	0.905473	0.998898	1.04035	1.00405	0.972307	1.02306	0.990289	1.00238	1.01022	0.998488	1.02802	0.977849	0.983653	0.969337	1.01939	0.985711	0.954446	0.973465	1.01946	1.00545	0.983767	0.995212	1.01635	1.01492	0.966463	1.08998	0.983788	0.953888	1.03772	0.982921	0.962152	1.00873	1.01036	1.02043	1.02517	1.00356	1.01623	0.995545	0.982737	0.905498		0.995751	0.032337
110	0.991746	0.997982	1.01489	0.988967	1.00979	1.03816	1.02984	0.993039	1.04961	0.981871	1.03301	1.0025	1.01061	0.964456	1.03106	1.0354	0.983101	1.02355	0.969818	0.916502	0.990885	1.0102	0.946645	0.985071	1.02797	1.00076	1.01567	1.0167	0.958284	0.979358	1.018	1.00129	0.966367	0.981412	1.01379	0.990403	1.01354	1.05752	0.985587	1.00674	0.94539	0.966129	0.903234		0.996438	0.0325931
120	0.9863	1.02118	1.02244	1.02711	1.02852	0.990055	1.00126	0.959888	0.962126	0.992505	1.01745	0.994626	1.04279	0.874367	1.01876	1.02616	0.970797	1.02585	1.01464	0.981445	0.95789	0.98878	1.06635	1.03914	0.989333	1.00404	1.00752	1.03955	0.964142	1.01824	1.01666	0.975432	0.993477	1.01993	0.977518	0.97699	1.02945	1.06568	1.01506	1.00233	0.981715	1.01996	1.00963		1.00272	0.0332489
130	1.01658	1.02282	1.01486	1.01785	1.01558	0.990602	0.981827	0.95922	0.932117	0.992505	1.03698	1.01037	0.997478	1.03736	1.00445	0.964248	0.975707	1.02056	1.05278	1.0172	1.05093	0.994569	0.966509	1.04761	1.00409	1.00789	0.989107	1.04954	0.946342	1.01076	1.02201	0.982777	0.976683	0.947172	0.930154	0.956702	1.03515	1.07701	0.999801	1.00436	1.0337	1.03084	1.10773		1.00541	0.0373977
140	1.02234	1.00379	0.988241	1.06094	1.00979	1.05456	0.981961	0.96425	0.932844	1.00159	0.995378	1.01519	0.999498	0.977792	0.989864	0.989197	0.982438	1.02505	1.07344	1.05733	1.037	1.06172	0.878692	1.06532	0.994852	1.01786	0.970998	1.00555	0.973155	1.00347	1.03393	0.980427	0.988678	0.976276	0.953289	0.963744	1.02732	1.0525	1.01485	1.01522	1.06517	1.01309	1.06019		1.00648	0.0396881
150	1.01401	1.01763	0.948701	1.1187	0.992769	0.950694	0.971761	0.963877	0.961581	0.960492	0.976772	0.990119	1.00534	1.02113	0.905182	0.928672	0.996449	1.01511	0.974904	1.01282	0.978999	1.12367	0.990031	1.08628	1.00937	1.02001	0.964787	1.0864	1.02047	0.976307	0.998725	0.986891	1.01387	0.952736	0.964103	0.973134	1.0038	1.04957	0.980361	0.99215	1.00572	1.00851	1.10169		1.00033	0.0469295
160	1.01962	1.01872	1.03508	1.01216	1.0023	0.94468	1.00019	1.00526	0.982133	0.957279	0.98703	0.991259	1.01176	0.864069	0.959253	0.974875	0.978343	1.01574	0.975221	1.00917	0.987811	1.06809	0.854124	1.0914	1.02077	1.02525	0.977882	1.03312	0.998165	0.981425	1.02938	0.987772	1.00067	1.00624	0.989564	0.95402	1.04299	1.07808	0.973881	1.00199	1.00484	1.04058	1.17413		1.00154	0.0514397
170	0.968358	1.02923	0.96406	1.12426	0.989024	0.898758	0.993097	1.01699	1.01851	1.00524	1.00535	0.962461	1.02923	0.985941	0.974416	0.980419	0.981964	1.01304	0.952017	0.977796	1.0163	1.0403	1.018	1.08387	1.00625	1.00606	0.973093	1.02483	0.976647	0.977193	0.996985	0.993354	0.999474	0.973708	0.982309	0.921828	1.03563	1.06785	1.03325	1.0393	1.0267	1.03543	1.00888		1.0025	0.0395461
180	1.0161	1.0371	0.877537	1.2	1.01898	0.968188	0.99541	1.0067	1.00214	1.02042	1.0137	1.00566	1.00549	0.987942	1.00903	0.985501	0.995312	0.997975	1.03053	1.00771	1.0329	1.05072	1.00519	1.12184	1.04728	1.02291	0.967631	1.0408	1.01078	0.965677	0.992836	1.02215	0.982921	0.999817	1.01078	0.887289	1.03397	1.05706	1.01736	1.02878	1.01263	1.03657	1.13112		1.01536	0.0519226
190	1.02635	1.0272	1.03631	0.976138	1.01932	0.966548	1.01186	1.03503	1.02342	0.997932	0.98894	1.01343	1.05441	0.981792	1.01361	1.00306	0.991595	1.02263	1.07376	1.10039	1.03433	1.02294	0.988463	1.09014	1.04272	1.01641	0.973018	1.05463	1.01236	0.952291	1.00595	0.995117	1.02179	0.982696	0.972316	0.857444	1.01425	1.05157	1.02091	1.03489	1.05063	1.03886	1.2028		1.01861	0.0491772
200	1.00745	1.0298	1.01918	1.07116	1.00775	0.967094	0.995842	1.01485	0.9945	1.04446	0.957954	0.989239	1.06112	0.98809	1.02648	0.977185	0.985907	1.00538	1.05977	1.07047	0.964038	1.03625	1.01355	1.08473	1.03444	1.02859	0.935753	1.06579	1.02926	0.936542	0.979452	0.991885	1.01867	1.02978	0.998188	0.868342	1.02993	1.07605	1.02718	1.00606	1.02845	1.11446	1.40956		1.0228	0.0750591
210	0.9863	1.02318	0.987697	1.0702	1.01252	0.928279	0.988943	0.995967	0.905563	1.04745	0.875254	1.01405	1.05001	0.978236	1.02992	1.00491	0.977584	1.00192	1.04388	1.00771	0.98986	1.05593	0.995258	1.11266	1.03265	1.01982	0.949596	1.06516	1.02182	0.939396	0.997253	1.00423	1.01819	0.994681	0.984499	0.881085	1.02138	1.04305	1.05896	1.00402	1.03243	1.0904	1.35221		1.01382	0.072133
220	1.02362	1.02218	1.00734	1.07171	0.999578	0.960534	0.991667	1.01467	0.946303	1.07747	0.891242	1.03415	1.01162	0.981792	0.999877	0.96702	0.970853	1.03593	1.01909	1.07849	1.03372	0.995148	1.02767	1.12851	1.03013	1.01837	0.918617	0.995109	1.043	0.966464	1.02068	0.990416	1.01291	1.00709	0.978887	0.924678	1.04394	1.10466	1.03241	0.940931	1.00492	1.03027	1.04811		1.00934	0.0471256
230	1.03115	1.01063	1.03806	0.939022	1.03771	0.994976	0.987966	1.0259	0.97795	1.02197	1.02042	1.03358	1.05419	0.979644	1.00932	0.99659	0.980447	1.04028	1.01337	1.02304	0.949077	1.04957	1.02845	1.13588	0.964498	1.00417	0.920413	1.09024	0.979802	0.945007	0.963927	1.00893	0.95701	0.992113	1.01913	0.950499	1.06437	1.08859	1.02259	1.0471	1.02392	1.05891	0.968883		1.01045	0.0441439
240	1.03628	1.04275	1.0101	1.14066	0.986641	0.896571	1.00981	1.05235	0.973221	1.01266	1.0009	1.02513	1.05123	0.998017	1.03049	0.972564	0.989263	1.01513	1.09792	1.07339	0.976539	1.04493	0.988724	1.12691	1.00925	0.980685	0.904998	0.946116	1.0029	0.969909	0.939835	1.02185	0.997795	1.01266	1.01503	0.907576	1.07173	1.08086	1.00043	1.05694	1.02424	1.02569	1.18771		1.01647	0.0583001
250	1.02058	1.03812	1.02433	1.10354	1.01932	0.962174	1.01634	1.05793	1.02014	1.03227	0.99276	1.00478	1.07151	1.00995	1.04422	0.993356	0.989434	1.05979	1.08457	1.09893	1.00626	1.03162	1.0227	1.1242	1.00313	1.02373	0.869004	0.954683	1.02475	0.961444	0.917751	1.00041	0.998515	1.02464	1.00394	0.878905	1.05297	0.999766	0.968864	1.0471	1.0542	1.08296	1.29939		1.02314	0.0674925
260	1.03003	1.04126	1.04223	1.10388	1.06086	0.974201	1.02057	1.05213	1.03797	1.01986	1.00281	1.02684	1.09135	1.03499	1.04794	0.956856	0.980864	1.05417	1.07503	1.0982	0.979203	0.959256	0.963634	1.1409	1.00349	1.02026	0.84648	0.884006	1.04391	0.928569	0.928191	1.00393	0.996356	0.990828	0.971221	0.85342	1.06105	1.10786	0.992485	1.0142	1.04165	1.12018	1.46766		1.0249	0.0947079
270	1.03916	1.03837	1.04902	1.08865	1.07278	0.982402	1.01557	1.0461	1.02087	1.04346	0.969627	1.03218	1.06581	0.994091	1.05996	0.961476	0.980314	1.06724	1.06518	0.99312	0.962193	1.02583	1.05746	1.14135	0.986094	1.006	0.894072	1.04071	0.996137	0.930144	0.96299	1.01275	0.979322	0.980984	0.968757	0.844701	1.06342	1.08381	0.989558	0.966371	1.07082	1.11159	1.359		1.02371	0.0770647
280	1.04445	1.02034	1.09179	1.05538	1.05984	0.978028	1.00245	1.03148	0.95667	1.04601	0.981158	1.00488	1.0985	0.999573	1.06539	0.988273	0.977319	1.06353	1.04388	0.990201	1.00277	1.02062	1.0653	1.15349	0.999771	1.01812	0.877909	0.97387	1.00628	0.9329	0.942378	1.00099	0.975723	0.979272	0.952878	0.870354	1.0601	1.01416	0.987886	1.01182	1.05238	1.11217	1.40126		1.0212	0.0812394
290	1.05214	1.02791	1.10127	1.01133	1.08503	0.964908	1.02888	1.04313	0.922295	1.07326	0.957317	0.984888	1.08861	0.986978	1.04165	0.970716	0.978627	1.07128	1.07948	0.949338	0.969981	1.0843	1.09222	1.16106	0.990893	0.994193	0.888984	1.03669	0.974845	0.963118	0.996852	1.01921	0.986999	0.996821	0.984773	0.8613	1.08076	1.05684	1.03387	1.00775	1.0643	1.02569	0.947		1.01483	0.0599408
300	1.05614	1.00663	1.08852	1.03541	1.01422	0.984042	1.02881	1.04466	0.903198	1.06284	0.974296	1.03171	1.11199	0.919115	1.06539	0.967944	0.984391	1.06454	1.06391	1.00844	0.975719	1.04667	1.00885	1.15915	0.979135	0.982327	0.843412	1.02938	0.857228	0.923746	0.970083	1.00011	0.977642	1.00795	1.00271	0.85124	1.04014	1.04551	1.01422	1.00707	1.0573	1.04344	1.09263		1.00772	0.0659602
310	1.05726	1.02823	1.11997	1.01216	1.05643	0.985682	1.01429	1.04944	0.954851	1.04789	1.00995	1.04943	1.07014	0.814431	1.08456	1.00075	0.982343	1.07577	1.05373	1.12665	0.988631	1.00383	1.00754	1.18228	0.982495	0.985672	0.866236	0.960662	0.917952	0.919219	0.962588	0.901981	0.955331	0.929624	0.847885	0.848893	1.04014	1.12678	0.918278	1.03319	1.04967	1.07437	1.22695		1.00754	0.0867542
320	1.07024	1.03166	1.09775	1.0903	1.02579	0.977482	1.02388	1.06278	0.996865	1.03814	0.981229	1.04652	1.14013	0.916893	1.07254	0.946691	0.977015	1.07617	1.05914	1.02888	1.01056	1.07851	1.05825	1.18388	0.968217	0.982327	0.878208	0.961287	0.967972	0.929357	0.951747	0.870544	0.95821	0.927056	0.841999	0.84839	1.06152	1.07626	0.890895	1.06609	1.08051	1.1156	1.24732		1.0143	0.0870101
330	1.05887	1.00293	1.10152	1.07287	1.01728	0.934293	1.01911	1.04688	1.04142	1.01676	0.984837	1.03477	1.08753	0.898371	1.08084	0.967482	0.966986	1.08741	1.08965	1.0639	1.01363	1.02236	0.960236	1.18127	0.988494	1.01578	0.867882	0.962358	1.0038	0.956818	0.972894	0.93048	0.931819	0.93262	0.891004	0.9116	1.05772	1.06967	0.95465	1.06508	1.07439	1.10987	1.45181		1.02093	0.0956475
340	1.04653	1.0368	1.11695	1.01291	1.02273	0.966001	1.01115	1.04274	1.05798	1.04025	0.974084	1.06429	1.0767	0.855623	1.06625	0.955007	0.960482	1.06689	1.07249	1.04274	0.998878	1.07041	1.05459	1.14451	0.974216	0.979928	0.9041	0.933266	0.981492	0.948944	0.964997	0.913439	0.950532	0.916356	0.860889	0.910929	1.06081	1.10993	0.988304	1.01895	1.0488	1.11847	1.38994		1.01701	0.0901424
350	1.03836	1.04099	1.09844	1.03308	1.07448	1.03871	1.01632	1.0558	1.08053	1.05631	0.975357	1.04699	1.08976	0.905039	1.06797	0.958704	0.962985	1.08891	1.07471	1.09966	1.00728	1.07272	1.06217	1.16843	0.95718	0.980875	0.917494	1.01028	0.970451	0.926699	0.949739	0.938119	0.935898	0.927484	0.877726	0.894833	1.06627	1.11527	0.946289	1.06169	1.05246	1.12648	1.15677		1.02153	0.0735912
360	1.05022	1.05094	1.11892	0.972776	1.0612	1.01958	1.03067	1.04973	1.04688	1.07492	0.973801	1.04388	1.09222	0.969494	1.11832	1.0026	0.930014	1.10196	1.04992	0.949338	1.01322	1.03625	1.01643	1.18213	0.973496	0.987061	0.917943	0.951738	0.961889	0.973256	0.969146	0.929599	0.940936	0.9155	0.893195	0.889468	1.05867	1.08381	0.951933	1.04914	1.03847	1.11274	1.34089		1.0208	0.0839411
370	1.05102	1.02945	1.12777	0.956448	1.05541	1.01028	1.01589	1.02961	1.00869	1.03526	1.01971	1.06061	1.10384	0.881479	1.10602	0.968406	0.922373	1.08854	0.967593	0.89534	0.967112	1.10572	1.06661	1.15153	1.00685	0.985861	0.884868	0.989754	0.956368	0.935755	0.939567	0.983071	0.98508	0.948028	0.926595	0.86348	1.0715	1.07444	0.928939	1.05863	1.06168	1.10358	1.35674		1.01594	0.0892435
380	1.06704	1.03418	1.12324	0.973874	1.04724	1.01794	1.0378	1.0359	1.05616	1.02374	1.0062	1.04	1.0832	0.810282	1.08055	0.946691	0.951097	1.08731	1.01432	0.888773	0.988836	1.12946	1.01564	1.1749	1.00325	0.978034	0.884868	0.984846	0.963241	0.917742	0.931002	0.986303	0.943335	0.96258	0.928238	0.893157	1.05629	1.04847	0.898629	1.08916	1.06279	1.12247	1.4171		1.01642	0.0985622
390	1.08674	1.0295	1.1346	0.991437	1.07618	1.00318	1.02415	1.01723	1.00141	1.04734	1.00104	1.04523	1.10088	0.858587	0.99673	0.861216	0.947571	1.0746	1.03593	0.961743	0.994984	1.10398	1.00101	1.17796	1.01021	1.00246	0.890032	0.931927	0.992532	0.914002	0.93234	0.888466	0.952452	0.922776	0.839945	0.860965	1.0696	1.07284	0.899047	0.968406	1.02797	1.1282	1.45106		1.00764	0.106298
400	1.09251	1.04805	1.13478	0.96715	1.06461	1.07479	1.019	1.02986	1.01087	1.0562	0.993892	1.09169	1.10679	0.896371	1.02648	0.897716	0.941864	1.08355	1.03721	1.0442	0.977769	1.06288	0.939589	1.16979	0.992213	1.00436	0.87746	1.0317	0.935752	0.909179	0.943583	0.927248	0.915265	0.948028	0.861984	0.84051	1.06223	1.08841	0.90072	1.02946	1.05365	1.15111	1.36655		1.01412	0.0978356
410	1.07985	1.04234	1.1216	1.00454	1.07822	1.00919	1.01582	1.01489	0.980678	1.02241	1.04101	1.06445	1.03608	0.964678	1.03879	0.882007	0.938603	1.06153	1.05151	1.14271	0.945388	1.10919	1.00362	1.16347	0.992333	0.989712	0.890331	0.949954	0.971916	0.90977	0.936355	0.853503	0.904469	0.927484	0.833375	0.837492	1.06223	1.10337	0.945034	0.985366	1.05866	1.12305	1.40126		1.01135	0.101897
420	0.995271	1.05762	1.11209	0.980323	1.12078	0.986229	1.0009	1.02531	1.03051	1.05675	0.994812	1.08485	1.09633	0.959196	1.06539	0.89633	0.943495	1.05368	1.08075	1.12884	0.968342	1.07272	0.911884	1.17099	0.982375	0.99615	0.869304	0.927019	0.935301	0.858587	0.887905	0.909914	0.967806	0.931764	0.860205	0.772437	1.05321	1.10405	0.912216	0.997577	1.0554	1.13164	1.38315		1.00766	0.106034
430	1.05614	1.04215	1.09927	1.09805	1.07448	0.956161	0.997199	1.01072	1.0447	1.02983	1.02792	1.04979	1.08666	0.939711	1.05366	0.92359	0.926848	1.05763	1.06264	1.0566	1.02163	1.07793	1.03185	1.1744	0.977216	0.99817	0.860848	0.950757	0.975746	0.899533	0.885362	0.958685	0.963728	0.983124	0.924816	0.784342	1.04893	1.10743	0.943153	0.922615	1.03092	1.11274	1.25411		1.0112	0.0858253
440	1.06463	1.05867	1.09499	1.05215	1.1218	0.945774	1.01103	1.02591	1.04088	1.06506	1.03691	1.03958	1.0731	0.995572	1.05681	0.924514	0.928251	1.04146	0.993658	0.89534	0.994574	1.0953	1.04858	1.1579	1.00025	0.987376	0.862644	0.952095	0.926176	0.907309	0.919893	0.961036	0.976683	0.965148	0.928786	0.74779	1.02993	1.11004	0.901138	0.902602	1.02519	1.12018	1.29637		1.00658	0.0928861
450	1.07521	1.03885	1.09847	1.06979	1.05371	0.969281	1.00995	1.02153	1.04088	1.09364	0.989506	1.02689	1.10059	0.946453	1.06768	0.914811	0.924743	1.04273	1.01209	1.10476	0.982278	1.05999	1.01956	1.16964	0.989333	0.986682	0.873793	1.06552	0.854073	0.831618	0.877197	1.00922	0.960609	0.974992	0.968894	0.731359	1.02898	1.05107	0.877935	0.926346	1.06668	1.10987	1.28052		1.00692	0.0965431
460	1.05534	1.06064	1.10381	1.11143	1.09184	0.990055	1.01609	1.02358	1.05088	1.06273	1.03379	1.07916	1.12462	0.955936	1.04279	0.890324	0.926089	1.01826	1.00605	1.08433	1.00441	1.0872	1.01381	1.11447	0.986334	1.00126	0.831065	0.877045	0.915473	0.875221	0.845744	0.997174	0.995876	0.972852	0.962871	0.700844	1.02969	1.06632	0.862049	0.96671	1.05341	1.12305	1.26241		1.00635	0.0989149
470	1.08466	1.05837	1.11456	1.08639	1.08742	0.968735	1.01685	1.02462	1.07362	1.08367	0.992973	1.01783	1.07259	0.934599	1.04393	0.905109	0.915301	1.0266	0.998744	1.02742	0.987401	1.1364	1.02375	1.1084	0.979855	1.00562	0.823657	0.887843	0.858129	0.871383	0.899683	0.953103	0.991078	0.97328	0.932208	0.709227	1.0361	1.0934	0.872291	0.911082	1.05675	1.12706	1.3341		1.00246	0.104836
480	1.09635	1.05626	1.1334	1.07809	1.01592	0.94304	1.01937	1.02743	1.01287	1.08156	1.01717	1.03705	1.05657	0.941564	1.06425	0.926824	0.912571	1.04609	0.987618	1.14198	0.983302	1.10398	0.993429	1.13042	0.964138	1.01079	0.80263	0.947812	0.834921	0.842642	0.893124	0.99453	0.988199	0.955732	0.972727	0.71979	1.04822	1.0841	0.887133	0.948394	1.0635	1.13049	1.24732		1.00333	0.0997893
490	1.03772	1.04896	1.14891	1.02355	1.02852	0.879077	0.992202	1.01568	1.06034	1.03139	1.01278	1.03881	1.12707	0.971198	1.07712	0.930058	0.92061	1.05462	1.02195	1.04347	0.951742	1.10456	1.04387	1.14797	0.938343	1.00745	0.854113	1.02036	0.864438	0.837327	0.858058	0.940763	0.986279	0.95188	0.920299	0.667981	1.00333	1.07626	0.837174	0.948733	1.04371	1.07895	1.03151		0.990212	0.094902
500	1.05454	1.07159	1.13544	1.13496	1.0612	0.94304	1.01057	1.0246	1.04433	1.02762	1.00797	1.02871	1.0609	0.957344	1.10659	0.945767	0.9248	1.07382	0.967593	1.18065	0.970801	1.06288	1.01852	1.12941	0.966178	0.986177	0.866161	0.96209	0.856777	0.855044	0.908115	0.958685	0.95653	0.962152	0.923721	0.717108	0.975297	1.07084	0.758369	0.896157	1.03545	1.0738	1.11074		0.994954	0.0971863
510	1.07873	1.06443	1.09154	1.16796	1.07856	1.02887	1.00627	1.01794	1.0678	1.01676	1.05162	1.02664	1.04582	0.967197	1.10487	0.914349	0.913974	1.09373	1.04134	1.06025	0.933502	1.0843	1.06556	1.13699	0.95406	0.977782	0.830392	0.968783	0.882689	0.828074	0.872111	0.991592	0.955091	0.970284	0.931934	0.634448	0.959145	1.05193	0.74938	0.909386	1.01184	1.06062	1.09565		0.992888	0.10461
520	1.06864	1.0637	1.12894	1.06004	1.0578	0.984042	1.01168	1.03032	1.08744	1.13119	0.935811	1.05621	1.06819	0.954529	1.11918	0.957318	0.911737	1.09763	1.0175	1.08579	0.94088	1.03162	0.970952	1.17144	0.963658	1.00126	0.820215	0.989844	0.920317	0.829354	0.873048	0.910208	0.923422	0.918924	0.897712	0.725491	0.938955	1.07922	0.677264	0.793381	1.02972	1.05604	1.13866		0.986727	0.110457
530	1.0829	1.05605	1.15326	1.00536	1.05439	1.01028	1.00915	1.02961	1.05998	1.0953	0.954629	1.05668	1.07173	0.969716	1.09543	0.918969	0.90074	1.0997	1.01178	1.05733	0.950717	1.03509	0.968338	1.17345	0.961379	1.00208	0.865861	0.941297	0.963804	0.807503	0.819913	0.88259	0.941656	0.899664	0.866228	0.675023	0.961995	1.09439	0.690642	0.81475	1.02718	1.04516	1.04057		0.979588	0.109825
540	1.09443	1.0408	1.15352	1.03768	1.08605	0.976388	1.00054	1.01947	1.01032	1.10383	0.982219	1.06968	1.11365	0.972458	1.14149	0.936064	0.892758	1.1013	1.00129	1.02596	0.963833	1.06983	1.05041	1.1729	0.958859	1.01515	0.82478	0.907565	0.845173	0.775416	0.805324	0.886409	0.969965	0.903516	0.862942	0.666137	0.913302	1.05791	0.658242	0.77676	0.969077	1.0297	1.07528		0.974845	0.121836
550	1.03916	1.03867	1.18216	0.99473	1.05303	0.974201	1.00606	1.03472	1.04379	1.12753	0.92053	1.07708	1.12231	0.96053	1.13577	0.910653	0.886426	1.1268	1.02481	1.10257	0.981868	1.08372	1.04988	1.19186	0.947701	1.01344	0.830167	0.890074	0.899363	0.804156	0.830888	0.874363	0.975003	0.906084	0.861437	0.718952	0.9019	1.01352	0.634831	0.734021	0.953418	1.0778	1.1198		0.978042	0.125467
560	1.04173	1.02877	1.16797	1.0479	1.08367	0.928826	1.00549	1.045	1.01669	1.11236	0.988021	1.06823	1.13133	0.958974	1.11374	0.95778	0.891374	1.12182	1.03689	1.01866	0.976539	1.11904	1.08438	1.17962	0.95718	1.00985	0.854637	0.951917	0.910854	0.783388	0.849358	0.921372	0.938777	0.93476	0.898807	0.689946	0.92114	1.09418	0.654689	0.727916	1.00731	1.05547	1.16206		0.987172	0.122976
570	1.06447	1.05313	1.1476	1.07569	1.02647	0.986229	1.01344	1.02635	1.05216	1.11236	1.00691	1.01617	1.0731	0.956603	1.11689	0.822406	0.872794	1.12774	1.00605	1.0245	0.979203	1.09819	1.06844	1.2052	0.971817	1.01521	0.854038	0.956111	0.896884	0.779845	0.822055	0.957216	0.946214	0.942036	0.928786	0.660939	0.889074	1.10947	0.694823	0.798469	1.00405	1.09098	1.19148		0.987013	0.122787
580	1.04349	1.05583	1.15	1.05737	1.04554	0.966001	1.00955	1.01473	0.990135	1.12787	0.900085	1.03674	1.11949	0.967938	1.09715	0.896792	0.874159	1.13693	1.03307	1.10039	0.971826	1.07677	1.01904	1.19787	0.987414	1.02234	0.8158	0.94683	0.790646	0.80268	0.839588	0.926955	0.949333	0.89196	0.907842	0.739239	0.90095	1.07797	0.644028	0.796773	0.962718	1.05261	1.13942		0.978694	0.121443
590	1.07633	1.05945	1.16347	1.06245	1.09797	0.974201	1.00428	1.01625	1.02178	1.12809	0.886573	1.03632	1.10167	0.977199	1.1392	0.917583	0.876187	1.13463	0.989525	1.0369	0.973055	1.08488	1.02296	1.19376	0.975176	1.02695	0.844535	0.960752	0.831429	0.749529	0.777619	0.951634	0.969246	0.931764	0.930976	0.645346	0.872447	1.09001	0.597832	0.665843	0.983384	1.02683	1.1198		0.975019	0.137319
600	1.07809	1.02428	1.19353	1.00262	1.0755	1.01848	1.02188	1.02366	1.03488	1.1025	1.00656	1.06336	1.14431	0.967938	1.16037	0.907419	0.872206	1.13961	0.945977	0.936203	0.969981	1.0762	1.03342	1.18147	0.980215	1.02203	0.853664	1.04705	0.809122	0.728761	0.763566	0.96133	0.973084	0.96472	0.953152	0.600244	0.90095	1.09415	0.671202	0.733682	1.00111	1.03142	1.08811		0.980418	0.133859
610	1.04221	1.06967	1.20246	1.03411	1.07652	0.976388	1.05462	1.04614	1.04506	1.08832	1.01858	1.07755	1.13587	0.956751	1.13834	0.837653	0.879088	1.1456	0.975221	1.12082	0.968137	1.07735	1.02192	1.16021	0.979375	1.04639	0.833984	0.920683	0.850581	0.671869	0.716052	0.925779	1.00259	0.948456	0.921804	0.585993	0.905938	1.10897	0.649881	0.699423	1.00047	1.04745	0.993029		0.975752	0.143918
620	1.08257	1.00547	1.22029	1.09496	1.05405	1.00974	1.03494	1.02236	1.05125	1.11036	0.966726	1.06812	1.15362	0.968679	1.1372	0.854286	0.882937	1.15247	0.975539	1.06682	0.977564	1.08546	1.04518	1.14973	0.975776	1.03459	0.838473	0.934337	0.816107	0.727186	0.732381	0.895224	0.968286	0.915072	0.888951	0.561346	0.859382	1.06258	0.637757	0.677036	0.981556	1.05089	1.03906		0.971309	0.145804
630	1.09459	1.04818	1.2156	1.03404	1.05065	0.981855	1.03757	1.03678	0.99541	1.13717	0.956115	1.07864	1.17361	0.945416	1.12919	0.875539	0.881591	1.13298	0.992386	1.04785	0.976949	1.08488	1.01042	1.14516	0.986814	1.02695	0.842365	0.97271	0.837738	0.741852	0.752591	1.00246	0.932779	0.927056	0.959175	0.61064	0.888836	1.06226	0.623752	0.767941	0.955326	1.0652	1.15828		0.980867	0.137216
640	1.11221	1.02669	1.23394	0.990271	1.07652	1.04199	1.0275	1.03989	1.07307	1.12554	0.936165	1.04746	1.20933	0.936822	1.14435	0.872305	0.885876	1.14814	1.01337	1.00188	0.972645	1.09067	1.00022	1.15013	0.974336	1.03042	0.835555	1.04767	0.735668	0.770789	0.793145	0.989241	0.951252	0.933476	0.963145	0.596556	0.828029	1.0888	0.663259	0.700441	0.969236	1.05031	1.16809		0.982475	0.145028
650	1.04829	1.07427	1.22221	1.0007	1.11329	1.01958	1.01818	1.04236	1.06307	1.02263	1.04759	1.06786	1.09431	0.959641	1.12375	0.865836	0.881818	1.14636	1.03434	1.1719	0.982073	1.08025	0.923384	1.15404	0.95706	1.02872	0.855385	0.956379	0.802475	0.740966	0.766778	0.961917	0.95701	0.974136	0.960817	0.535525	0.802138	1.09208	0.66305	0.672627	0.996181	1.036	1.09037		0.976915	0.145763
660	1.08145	1.06318	1.22022	0.97751	1.08946	1.02067	1.01304	1.02902	1.07143	1.05775	0.9975	1.08646	1.13847	0.947046	1.00331	0.824716	0.871865	1.16316	1.04801	1.0909	1.0124	1.1063	0.987417	1.13463	0.987654	1.03112	0.841691	0.834478	0.8196	0.675708	0.680986	1.04741	0.970205	0.966432	1.01256	0.520938	0.871021	1.05777	0.775927	0.773707	1.0248	1.06692	1.1862		0.980955	0.145862
670	1.04926	1.08524	1.24574	0.988967	1.08299	1.00044	1.02502	1.0344	1.08889	1.06428	1.04108	1.05051	1.13667	0.959863	1.09057	0.875077	0.88726	1.16596	0.97395	1.11279	0.986171	1.0843	1.0065	1.14857	0.95226	1.01092	0.85965	0.944778	0.770367	0.683189	0.719532	1.02832	0.953411	0.965148	0.997503	0.523789	0.840855	1.06928	0.71928	0.727916	0.984179	1.04745	1.15979		0.980049	0.146718
680	1.068	1.06397	1.23645	0.9972	1.10648	1.00318	0.990978	1.0314	1.06489	1.03703	0.979956	1.05554	1.15622	0.959048	1.06596	0.851514	0.885269	1.16502	0.988572	1.14271	0.973465	1.05535	1.02584	1.17425	0.957539	1.0296	0.838473	0.988327	0.755158	0.708091	0.751119	1.00158	0.965407	0.961724	0.993123	0.488411	0.812589	1.04997	0.719489	0.76421	0.992048	1.04001	1.0466		0.975389	0.145112
690	1.07425	1.07454	1.2383	0.977167	1.08027	1.03762	1.02142	1.03446	1.04361	1.03715	1.03471	1.07796	1.14222	0.922005	1.04823	0.81409	0.878538	1.16734	1.00192	1.08287	0.98986	1.09009	1.09301	1.19461	0.936663	1.05163	0.819691	0.986542	0.790195	0.702776	0.763566	0.976314	0.952692	0.974992	0.977655	0.522112	0.678147	1.04288	0.629605	0.766923	0.969077	1.00736	0.929644		0.968249	0.152402
700	1.07344	1.05945	1.24077	0.983685	1.10069	1.04144	1.00946	1.03438	1.07034	1.09131	0.960501	1.08128	1.11733	0.917485	1.09886	0.864912	0.881894	1.17691	1.04388	1.12447	0.977769	1.04667	1.018	1.15484	0.947221	1.04437	0.845508	0.935854	0.827035	0.646869	0.695039	0.877301	0.931819	0.912076	0.862806	0.538376	0.749881	1.06953	0.584454	0.738092	0.940383	0.9982	0.993784		0.96066	0.156251
710	1.08209	1.06973	1.23746	0.993633	1.06631	1.03051	1.03065	1.04993	1.0698	1.05731	1.01724	1.07439	1.15377	0.90941	1.08599	0.875077	0.878064	1.13387	1.04928	1.07412	0.97531	1.08372	1.06478	1.15274	0.914588	1.04406	0.853065	0.990468	0.782985	0.676397	0.735861	0.905507	0.933019	0.929624	0.881012	0.499812	0.754157	1.00996	0.561669	0.664486	0.902151	1.00221	0.980201		0.958986	0.158833
720	1.08225	1.08267	1.24759	1.04481	1.05371	0.992789	1.02341	1.0562	1.07216	1.07625	1.01901	1.09143	1.13616	0.912522	1.08685	0.85059	0.870443	1.13322	1.00701	1.17117	0.9583	1.07735	0.979315	1.18719	0.946861	1.05106	0.861446	0.945849	0.771381	0.589485	0.640699	0.950165	0.945254	0.974564	0.93563	0.470303	0.732779	1.06279	0.495406	0.636333	0.843411	0.901988	0.78401		0.947717	0.179959
730	1.0909	1.08178	1.21858	1.04179	1.08265	1.00208	1.02343	1.06423	1.11454	1.04855	1.00882	1.07206	1.16647	0.875108	1.10058	0.873229	0.864508	1.15209	1.04515	1.10476	0.994164	1.10861	1.07053	1.18288	0.925985	1.07334	0.878882	0.948883	0.810023	0.536236	0.585155	0.923135	0.961808	0.98826	0.914686	0.4641	0.765321	1.00262	0.486418	0.583418	0.80812	0.912869	0.814948		0.94818	0.187714
740	1.07008	1.0887	1.20842	1.11404	1.08435	1.0081	1.03052	1.06907	1.11581	1.07292	1.01299	1.07952	1.17238	0.866218	1.08113	0.888014	0.85846	1.1409	0.932309	1.10185	0.993139	1.09819	0.986111	1.18965	0.933664	1.07871	0.85965	1.00109	0.765861	0.591257	0.661846	0.959567	0.953891	0.969428	0.929881	0.465944	0.701188	0.978318	0.42768	0.518292	0.799615	0.914587	0.777219		0.943036	0.191673
750	1.04909	1.08473	1.18997	1.19074	1.04248	1.05292	1.03064	1.0731	1.11563	1.05221	1.06768	1.05621	1.11076	0.959863	1.14836	0.862602	0.859901	1.16647	1.01241	1.16168	0.969981	1.09183	1.01329	1.17561	0.928265	1.07202	0.850671	1.04722	0.740174	0.534858	0.5794	0.924604	0.976443	0.960868	0.918108	0.453537	0.743705	1.01526	0.386291	0.455541	0.832761	0.875644	0.678369		0.942137	0.209089
760	1.06768	1.08708	1.20544	1.17002	1.06869	1.05785	1.02532	1.06526	1.11654	1.03127	1.06916	1.08143	1.10665	0.957048	1.1023	0.86445	0.86466	1.17578	1.02163	1.10549	0.983712	1.09414	1.08098	1.16693	0.940863	1.03131	0.883072	1.04776	0.786703	0.445387	0.481428	0.969262	0.960369	0.960868	0.942064	0.400051	0.71924	0.949744	0.395698	0.43926	0.762496	0.884807	0.836831		0.939691	0.217085
770	1.07264	1.10965	1.22722	1.07637	1.10444	1.04964	1.04028	1.06732	1.13818	1.08644	1.03966	1.05466	1.106	0.948157	1.16209	0.894944	0.854535	1.17249	0.967593	1.1252	0.933707	1.07156	1.03681	1.13704	0.949021	1.06274	0.833011	1.10068	0.769128	0.487711	0.542995	0.95134	0.952931	0.973708	0.933166	0.391165	0.695724	0.999944	0.392771	0.490139	0.726966	0.918023	0.895688		0.942872	0.212502
780	1.09891	1.10452	1.22846	1.11294	1.10308	1.03106	1.0234	1.06437	1.14346	1.12864	0.985757	1.05823	1.09604	0.950232	1.12204	0.81871	0.851009	1.19933	1.06359	1.177	0.904605	1.06693	1.02845	1.15043	0.940983	1.07196	0.871324	1.03295	0.841681	0.483478	0.549955	0.979546	0.959169	0.954876	0.944254	0.383284	0.71734	0.992818	0.428725	0.537287	0.752561	0.842428	0.824003		0.944647	0.209898
790	1.09267	1.10149	1.22635	1.08097	1.04418	1.0245	1.01298	1.06213	1.09162	1.10438	1.00047	1.09904	1.12151	0.927265	1.14721	0.8529	0.857474	1.21078	1.01941	1.16752	0.944774	1.04667	1.00049	1.1407	0.95238	1.07429	0.868855	1.00403	0.80946	0.457001	0.497623	0.975139	0.98316	0.978416	0.967114	0.369201	0.718765	1.02371	0.43186	0.508456	0.792144	0.925468	0.870032		0.943828	0.211393
800	1.10692	1.10038	1.20751	1.13599	1.05303	1.00864	1.02229	1.06323	1.09071	1.09353	0.968919	1.11381	1.13284	0.95238	1.1229	0.850128	0.842742	1.19444	1.03562	1.18576	0.948872	1.03799	0.982713	1.19782	0.947701	1.08799	0.902004	1.02795	0.854524	0.394598	0.416649	0.962505	1.01435	0.979272	0.959996	0.324266	0.564371	1.04459	0.422872	0.44333	0.748507	0.790886	0.741754		0.93203	0.236011
810	1.08578	1.10452	1.20446	1.16892	0.997195	0.987322	1.01038	1.06736	1.0878	1.13329	0.92527	1.06175	1.1765	0.949268	1.04107	0.734159	0.852526	1.17242	1.03339	1.19525	0.966292	1.09646	1.06478	1.20685	0.934504	1.08692	0.869753	1.04776	0.713136	0.476588	0.5442	0.971613	0.965167	0.97542	0.956437	0.353775	0.595487	1.04042	0.330062	0.3548	0.770604	0.755952	0.678369		0.924278	0.239006
820	1.0909	1.0741	1.16586	1.26141	1.08027	1.05183	1.03543	1.06337	1.07016	1.15811	0.902702	1.05896	1.10434	0.954825	1.06024	0.821482	0.856128	1.20472	0.912601	1.19598	0.942519	1.06462	1.03734	1.15936	0.937263	1.09708	0.839671	1.00519	0.748399	0.485545	0.506322	0.966324	0.98316	0.96044	0.942885	0.324434	0.55772	0.940552	0.309786	0.336144	0.71401	0.819521	0.774201		0.920369	0.241057
830	1.09555	1.09238	1.19669	1.07034	1.0309	1.0234	1.00084	1.0607	1.08016	1.14703	0.934042	1.05129	1.13573	0.937785	1.06081	0.769273	0.852601	1.19651	0.984122	1.17481	0.944159	1.06288	1.01381	1.19386	0.928025	1.09405	0.852991	0.974584	0.721698	0.448438	0.478751	0.932537	0.989158	0.953164	0.915644	0.30817	0.513064	1.01918	0.283239	0.298832	0.643746	0.806349	0.753827		0.907561	0.24878
840	1.06976	1.09819	1.1533	1.25304	1.10172	1.03762	0.979462	1.07567	1.10144	1.11624	0.985827	1.06476	1.14475	0.945046	1.06968	0.737393	0.849435	1.21311	1.03689	1.20473	0.966702	1.02004	1.01983	1.13017	0.914588	1.09903	0.84214	0.968337	0.720459	0.434953	0.476743	0.966031	0.980281	0.976276	0.919751	0.311691	0.578622	0.984125	0.314384	0.348694	0.625306	0.683793	0.695724		0.911993	0.250936
850	1.10548	1.09419	1.23238	1.07747	1.08571	1.08627	0.990978	1.07327	1.08144	1.13352	0.943947	1.09547	1.14475	0.942971	1.10029	0.785444	0.846553	1.22279	0.972043	1.26165	0.921615	1.07677	1.04309	1.13934	0.877874	1.08319	0.823283	0.883292	0.657032	0.52846	0.548616	0.992179	0.955571	0.976276	0.950277	0.335332	0.476485	1.03358	0.315011	0.318506	0.672122	0.55551	0.585555		0.907572	0.256746
860	1.08834	1.09962	1.23499	1.12344	1.05984	1.05894	1.01907	1.0874	1.11217	1.13817	0.935669	1.09775	1.20305	0.894519	1.09686	0.737855	0.845984	1.22338	0.962507	1.28573	0.890464	1.09472	1.0491	1.13438	0.90355	1.10926	0.837725	0.904263	0.758425	0.426488	0.464698	0.973963	0.981241	0.970284	0.911948	0.295595	0.441093	0.942084	0.242059	0.246257	0.518081	0.685511	0.737226		0.902877	0.274578
870	1.09203	1.09746	1.20126	1.20686	1.0772	1.00372	1.00808	1.06131	1.10672	1.10881	0.941824	1.144	1.15903	0.887555	1.02133	0.729077	0.845833	1.22693	0.982214	1.29667	0.916697	1.07967	1.06975	1.16477	0.920826	1.09992	0.881052	0.968962	0.826697	0.448339	0.493206	0.97602	0.997555	0.991256	0.963692	0.311523	0.424941	0.946395	0.298289	0.301207	0.549159	0.656876	0.631585		0.909682	0.267167
880	1.11718	1.06137	1.26019	1.08605	1.08946	1.01302	1.01613	1.05531	1.00541	1.16675	0.890322	1.11764	1.21387	0.87333	1.1126	0.760495	0.834931	1.23038	0.9873	1.16168	0.9583	1.05362	0.955793	1.14968	0.921666	1.09051	0.869453	1.0483	0.69973	0.441154	0.485175	1.00305	0.926781	0.948456	0.948361	0.288386	0.343705	0.962641	0.249375	0.247953	0.557823	0.612779	0.624039		0.893957	0.276368
890	1.07537	1.04818	1.21012	1.05723	1.05916	0.952334	0.958805	0.999661	0.89756	1.05066	1.07603	0.969919	1.06675	0.938452	1.08628	0.815938	0.92827	1.25259	0.946295	1.06171	0.946618	1.05072	1.01042	1.12365	0.8504	1.03756	0.952216	0.839743	0.684521	0.913707	0.956431	1.13556	0.988439	0.94118	0.939052	0.892654	0.786936	1.00532	0.497497	0.5573	0.989027	1.02454	1.11829		0.969607	0.146012
900	1.02555	0.973085	1.17799	1.04529	1.07482	0.978028	0.947628	0.999779	0.897742	1.0521	1.06697	0.878034	1.06826	0.999351	1.09114	0.771583	1.02015	1.28681	1.03975	1.22589	0.976949	1.09704	1.0836	1.16748	0.875955	1.04418	0.945705	0.815291	0.829288	0.933885	0.952282	1.19138	0.95797	0.894528	0.899218	0.922498	0.866271	1.00408	0.67392	0.774047	0.987835	1.06349	1.25789		0.996156	0.13121
910	0.97829	0.994792	1.05966	1.12769	1.01864	0.968188	0.913985	0.975864	0.909746	1.03127	1.06421	0.86001	1.01299	0.978459	1.08456	0.791912	1.09817	1.27958	1.03466	1.20546	0.933297	1.03162	0.959713	1.12666	0.840561	1.02417	0.990678	0.833139	0.825007	0.918038	0.948802	1.16141	0.98436	0.868847	0.877316	0.947481	0.851306	1.0252	0.738511	0.838833	1.01295	1.06864	1.15074		0.984777	0.115253
920	0.99479	0.968733	1.10588	1.07761	1.01558	0.968735	0.905018	0.975294	0.914657	1.06628	0.984554	0.873839	1.01184	1.01239	1.12461	0.79376	1.1454	1.28442	1.06899	1.28135	0.962808	1.08198	1.04309	1.16954	0.826284	0.989522	0.989107	0.829302	0.758763	0.910262	0.929395	1.12322	0.919344	0.799511	0.821739	0.902714	0.900713	1.02563	0.724087	0.877502	1.01764	1.05719	1.25562		0.988109	0.132587
930	1.0052	0.946755	1.1366	0.95288	1.00673	0.988962	0.927136	0.986377	0.936664	1.0285	1.01759	0.887565	0.980161	0.985941	1.11975	0.816862	1.19771	1.29523	1.1065	1.17627	0.969161	1.05593	1.07393	1.15374	0.837322	0.996339	0.990454	0.798068	0.813629	0.912526	0.917216	1.12792	0.940696	0.829471	0.846516	0.899025	0.905226	0.984944	0.794949	0.902263	1.03545	1.07036	1.33184		0.992706	0.126456
940	0.965155	0.910802	1.12295	0.878853	1.01183	1.04144	0.92765	0.9862	0.891922	1.08998	0.92336	0.8554	0.998777	1.04995	1.12032	0.914811	1.20834	1.3055	1.05373	1.24633	0.934936	1.05188	1.02714	1.16056	0.825204	1.00789	0.995991	0.78147	0.705926	0.890478	0.904233	1.10294	0.942375	0.840171	0.856098	0.918474	0.891924	0.972973	0.849716	1.04303	1.02257	1.06349	1.22167		0.988708	0.12805
950	0.98662	0.924048	1.10893	0.837689	1.0326	1.00755	0.904206	0.966844	0.893377	1.04257	0.985686	0.865552	0.992499	1.01891	1.17925	0.899564	1.19342	1.30313	1.12017	1.14125	0.962808	1.02004	0.994735	1.1248	0.845601	0.985356	0.973018	0.767816	0.760341	0.91036	0.904902	1.03184	0.95581	0.817915	0.81202	0.936582	0.904038	0.968734	0.856614	1.05456	1.01645	1.02913	1.16206		0.981381	0.118081
960	0.974285	0.932077	1.13689	0.888458	1.0452	1.04855	0.919516	0.954052	0.909746	1.01665	0.995873	0.86607	1.01133	0.992535	1.13319	0.837653	1.17395	1.28954	1.04356	1.19087	0.925919	1.12019	0.991861	1.18729	0.815006	0.972922	0.976461	0.737921	0.709418	0.878568	0.904635	1.01363	0.941176	0.817915	0.813526	0.921828	0.904276	0.983804	0.840309	1.00741	0.999201	1.06177	1.27675		0.980507	0.13064
970	0.973324	0.924156	1.10537	0.871444	1.01115	1.0409	0.890531	0.932455	0.864095	1.02762	1.00337	0.867727	0.926044	1.04365	1.14006	0.837653	1.16767	1.28195	1.07662	1.18138	0.971416	1.07967	1.05041	1.16367	0.823165	0.949568	0.977134	0.72159	0.722036	0.869414	0.881212	1.06857	0.882397	0.810211	0.830226	0.917971	0.910214	0.981489	0.849716	0.953821	0.986245	1.0549	1.31674		0.975325	0.133296
980	0.964994	0.956217	1.0854	0.966739	1.01524	1.0316	0.908453	0.948058	0.91502	0.989181	1.02424	0.888238	0.955556	1.03543	1.16724	0.909267	1.12458	1.2604	1.05532	1.25143	0.982073	1.12193	1.03106	1.14622	0.830963	0.96661	0.975637	0.76032	0.738935	0.876206	0.90691	1.02979	0.910227	0.804219	0.825161	0.918642	0.910926	0.989469	0.828604	0.934147	1.01955	1.04631	1.2511		0.982735	0.122445
990	0.992707	0.963813	1.08493	0.886606	1.02375	1.05785	0.889461	0.930392	0.884647	1.00558	1.02495	0.870628	0.93795	1.05306	1.16524	0.886628	1.09934	1.24691	1.03117	1.26019	0.942314	1.06983	1.06321	1.11291	0.817766	0.963265	0.958426	0.741847	0.715389	0.878765	0.897407	0.984246	0.868962	0.789239	0.789434	0.909588	0.905701	0.976394	0.84658	0.896836	0.997691	1.05432	1.35372		0.972782	0.133429
1000	0.951378	0.904963	1.06318	0.953978	0.972682	1.02122	0.898746	0.94625	0.898833	0.984197	1.06251	0.85944	0.964286	1.03506	1.16466	0.8529	1.06753	1.23513	1.10237	1.22516	1.00359	1.11556	1.09876	1.06792	0.822445	0.96074	0.969352	0.752378	0.785914	0.878666	0.889511	0.994823	0.887675	0.808927	0.82215	0.90657	0.893824	0.960432	0.848253	0.949411	1.00103	1.04459	1.09867		0.970365	0.112968
1010	0.976368	0.936483	1.09165	0.985057	1.00605	1.02996	0.897667	0.944521	0.923387	0.94155	1.08147	0.859958	0.934342	1.04736	1.20987	0.871843	1.03298	1.26322	1.02481	1.26603	0.949487	1.07272	1.04178	1.06466	0.837682	0.954428	0.968154	0.767013	0.731387	0.877781	0.879071	0.985715	0.892714	0.814491	0.794498	0.934403	0.905463	0.987973	0.854733	0.919901	0.981079	1.03256	1.16055		0.970531	0.118556
1020	0.970921	0.928319	1.09927	0.944099	0.988003	1.00646	0.900432	0.944855	0.92757	1.01034	1.02481	0.873425	0.95036	1.0644	1.2153	0.875539	1.03772	1.28056	1.06677	1.23027	0.965677	1.04436	0.98402	1.10765	0.819086	0.939721	0.951767	0.732477	0.666495	0.802089	0.798097	1.01451	0.93038	0.808499	0.816537	0.90942	0.890974	0.962214	0.813553	0.935504	0.977264	1.02283	1.25336		0.964788	0.131323
1030	0.977009	0.941592	1.098	0.957957	0.989705	1.04308	0.912874	0.963366	0.909564	1.03859	1.01526	0.82453	0.994231	1.0684	1.24649	0.92128	1.01353	1.28555	1.01337	1.28573	0.947848	1.0843	1.04387	1.03262	0.813687	0.952471	0.927522	0.707401	0.730486	0.868332	0.834368	1.03537	0.90303	0.819199	0.807503	0.913277	0.886461	0.94554	0.809791	1.01182	0.995545	1.03428	1.27222		0.973885	0.133295
1040	0.974606	0.918777	1.11042	0.962691	0.996514	1.08299	0.89342	0.945071	0.948122	0.982646	1.07744	0.861719	0.963926	1.01446	1.2216	0.876925	0.995994	1.27031	1.07344	1.24268	0.937191	1.02409	0.958406	1.03332	0.808648	0.935618	0.9261	0.654125	0.701307	0.813704	0.849492	1.00628	0.885996	0.800367	0.795046	0.916295	0.887886	0.930932	0.764013	0.919562	0.988074	1.03772	1.30844		0.960381	0.138336
1050	1.01529	0.944917	1.11372	0.919469	1.0023	1.07151	0.883477	0.953089	0.941211	0.99472	1.05636	0.862858	0.896388	1.03291	1.21788	0.89171	0.985509	1.26848	1.00351	1.26311	0.930223	1.06867	1.07602	0.981159	0.788851	0.936565	0.904923	0.669206	0.713925	0.888312	0.877331	1.01069	0.923422	0.822623	0.789707	0.898857	0.871259	0.931003	0.80561	0.900567	0.989902	1.0486	1.21412		0.96186	0.130968
1060	0.979412	0.955622	1.10563	0.88393	0.998557	1.07862	0.88651	0.962089	0.865368	1.02529	1.04087	0.782317	0.934558	1.04462	1.18841	0.810393	0.963061	1.27222	1.0763	1.23611	0.963628	1.02641	1.0112	1.02585	0.775414	0.924131	0.896467	0.651626	0.679113	0.866658	0.863278	0.995411	0.863684	0.789667	0.765889	0.898522	0.88361	0.938485	0.858077	0.891069	0.996101	1.03142	1.19903		0.950805	0.135793
1070	0.958587	0.943646	1.07422	0.970787	0.991067	1.03106	0.876228	0.955525	0.835722	1.0552	1.03181	0.848148	0.867237	1.03225	1.20929	0.802077	0.955098	1.26839	1.07948	1.22735	0.986171	1.01136	1.03603	1.0916	0.788011	0.919081	0.927896	0.630833	0.683281	0.87404	0.879205	1.06299	0.892474	0.799939	0.830363	0.907911	0.90285	0.950349	0.882952	0.924311	0.975833	1.03256	1.31146		0.960806	0.138692
1080	0.965475	0.958785	1.10377	0.84256	1.02001	1.07315	0.877955	0.953207	0.858275	1.05664	1.03217	0.840638	0.90584	1.05966	1.22703	0.86214	0.939665	1.28247	0.874139	1.30908	0.928173	1.05883	1.01277	1.08127	0.79545	0.9312	0.919515	0.638687	0.668072	0.873154	0.872647	1.03478	0.887435	0.800367	0.834059	0.887792	0.904038	0.9501	0.890059	0.970781	0.964943	1.05203	1.30543		0.960563	0.144675
1090	0.976048	0.954541	1.11223	0.90362	0.977449	1.06714	0.877924	0.947174	0.897197	1.05808	1.00373	0.837582	0.937589	1.05462	1.1784	0.79376	0.914126	1.26862	1.0477	1.26165	0.966907	1.06867	1.05642	1.10559	0.759457	0.937322	0.907467	0.671527	0.757411	0.869217	0.871041	1.02362	0.947893	0.848303	0.826667	0.901708	0.897387	0.92687	0.891522	0.884286	0.966533	1.01137	1.25562		0.963302	0.131453
1100	0.951218	0.981276	1.11518	0.927496	1.01422	1.06605	0.880526	0.949512	0.919204	1.06174	1.02056	0.799979	0.890904	1.04936	1.25707	0.854286	0.908552	1.2883	1.00605	1.3317	0.960554	1.06751	1.03054	1.09019	0.782133	0.93606	0.939869	0.682146	0.701307	0.868922	0.860467	0.976314	0.905669	0.759707	0.764657	0.895672	0.878147	0.89851	0.847416	0.921258	0.998407	1.02512	1.30995		0.962179	0.147774
1110	0.974125	0.977031	1.09208	1.01133	0.999919	1.04308	0.873688	0.952303	0.944666	1.0902	0.888695	0.836184	0.893358	1.03425	1.23161	0.857058	0.897536	1.29015	1.08203	1.24997	0.847222	1.0432	1.0227	1.02875	0.768335	0.923689	0.944358	0.711506	0.713925	0.865477	0.863278	0.890523	0.853368	0.64543	0.668151	0.890642	0.892637	0.918533	0.896539	0.970102	0.987676	1.03084	1.32957		0.951761	0.149805
1120	0.98678	0.999144	1.13024	0.950136	1.02477	1.07807	0.883693	0.961322	0.868824	1.12177	0.891313	0.819661	0.887008	1.05751	1.21273	0.85059	0.894616	1.29589	1.04579	1.35067	0.92182	1.03567	1.05694	1.12039	0.746979	0.929369	0.991052	0.750861	0.694885	0.853863	0.84802	0.936356	0.840653	0.68181	0.680744	0.869348	0.877197	0.948283	0.911171	0.96671	0.980284	1.02741	1.30769		0.960187	0.156069
1130	1.0028	0.998387	1.1187	0.974903	0.986301	1.02778	0.879909	0.953914	0.890103	1.09995	0.881904	0.810441	0.907428	1.05892	1.21816	0.866761	0.888037	1.27817	1.05819	1.19817	0.958709	1.07504	1.09902	1.06161	0.763056	0.933598	0.979603	0.746666	0.705025	0.881422	0.845744	0.989535	0.863924	0.716906	0.709628	0.886786	0.891211	0.92092	0.908036	0.940931	0.975038	1.00736	1.28807		0.959227	0.14
MAX	1.11718	1.10965	1.26019	1.26141	1.1218	1.08627	1.05462	1.0874	1.14346	1.16675	1.08147	1.144	1.21387	1.0684	1.25707	1.05665	1.20834	1.3055	1.12017	1.35067	1.05093	1.1364	1.09902	1.20685	1.04728	1.10926	1.0346	1.10068	1.08998	1.06145	1.05173	1.19138	1.0345	1.07429	1.03789	1.06837	1.08076	1.12678	1.05896	1.08916	1.08051	1.15111	1.46766		1.13173	0.0930265

## Sheet: STIM1_-TG
Time [s]	cell 1	cell 2	cell 3	cell 4	cell 5	cell 6	cell 7	cell 8	cell 9	cell 10	cell 11	cell 12	cell 13	cell 14	cell 15	cell 16	cell 17	cell 18	cell 19	cell 20	cell 21	cell 22	cell 23	cell 24	cell 25	cell 26	cell 27	cell 28	cell 29	cell 30	cell 31	cell 32	cell 33	cell 34	cell 35	cell 36	cell 37	cell 38	cell 39	cell 40	cell 41	cell 42	cell 43		Average	Std. Err.
0	1.22912	1.14174	1.2087	1.32074	1.0976	0.969735	0.977614	0.910792	0.803759	0.789473	0.856027	0.784755	0.723047	0.930087	0.98588	0.978533	1.0316	1.02484	1.01958	1.03203	0.961425	0.964376	1.0188	0.999198	0.90109	1.02977	1.05998	0.954386	0.954558	0.9451	1.01431	1.17044	1.03765	1.0211	1.0348	1.03841	1.06053	1.0387	1.07505	1.00582	0.981347	0.925481	0.906501		0.998012	0.115132
10	1.27582	1.22487	1.25858	1.32444	1.08524	0.969879	0.92644	0.812821	0.798833	0.785505	0.897451	0.797912	0.772912	1.02955	0.987078	0.980084	1.02894	1.045	1.01603	1.01035	0.983875	0.858618	0.983701	1.01023	0.978414	1.02035	1.07202	0.99742	0.932725	0.99409	1.02296	1.09741	1.01648	1.00745	0.965919	1.0174	1.00458	1.05127	1.07006	0.999967	0.975226	0.94247	0.939957		0.999309	0.119481
20	1.26429	1.18808	1.2298	1.33783	1.04418	0.90919	0.922252	0.813049	0.832702	0.844535	0.910396	0.818006	0.839233	1.067	1.00425	0.969308	1.03717	0.994995	0.978853	1.02043	0.976633	0.88666	0.979115	0.98817	0.954002	1.00941	1.0618	0.997741	0.958297	0.94038	0.994471	1.0807	1.01309	0.995097	0.975641	1.02741	1.01111	1.0581	1.04273	0.988509	0.973111	0.96529	0.971084		0.997072	0.108172
30	1.24176	1.2874	1.27137	1.32558	0.989588	0.849654	0.919188	0.810762	0.878413	0.881555	0.956387	0.923571	0.919267	1.09072	0.99766	1.03474	1.03491	0.997087	0.991617	0.996342	0.973201	0.825769	0.968621	1.00873	0.967627	1.0025	1.07614	0.968047	1.01221	1.01715	1.0229	1.02243	1.02542	1.02719	0.987834	1.01068	0.986958	1.04403	1.08163	1.00777	0.986689	1.00381	1.01142		1.01015	0.107728
40	1.18022	1.24031	1.22085	1.2954	0.956619	0.895063	0.901721	0.838819	0.97668	0.999266	1.00713	0.907966	0.934102	1.15273	0.993667	1.02535	1.04644	1.01702	1.00872	1.04572	1.03485	0.976928	1.0016	0.995795	0.990336	1.01318	1.04256	0.99043	1.02328	1.01016	1.02703	1.08713	1.04189	1.04784	1.0231	1.00875	0.973279	1.04239	1.04281	1.0321	1.0282	1.0273	1.01566		1.02606	0.0862373
50	1.11593	1.21383	1.12876	1.24699	0.875373	0.903856	0.930628	0.882125	0.904182	0.91493	0.934309	0.924693	0.921261	1.02622	1.00724	1.02561	1.03445	0.993783	1.00422	1.05079	1.03177	0.820695	0.970826	0.988987	1.00737	0.998101	1.01065	1.00627	1.04788	1.06877	1.03416	1.01496	1.03718	1.03659	1.02277	1.02762	0.991025	1.05041	1.04348	1.02766	1.01562	1.05909	1.04424		1.00919	0.0804961
60	1.14176	1.14909	1.16585	1.27803	0.88338	0.906739	0.957491	0.90637	0.908374	0.90461	0.968814	0.959678	0.994439	1.09655	0.993667	1.00121	1.02998	0.998079	0.9931	1.03663	1.07305	1.06319	1.00539	1.00083	1.03564	0.971832	1.00535	0.99043	1.05229	1.00356	1.00524	1.06614	1.01337	1.00146	0.973663	1.0199	1.00458	1.00248	1.01682	1.00323	1.01696	1.03796	1.03196		1.01556	0.0730944
70	1.03681	1.13879	1.05905	1.17722	0.854728	0.913515	0.936552	0.908657	0.940703	0.939539	0.968814	0.980791	1.00254	1.02497	1.01663	1.01095	1.00905	0.986404	0.979065	1.02806	1.03098	1.07841	1.02083	0.983541	1.01123	0.998729	1.00329	1.00101	1.02223	1.03092	0.998428	0.995304	1.00773	1.00266	0.972015	0.996306	1.02873	1.00006	0.973671	0.989192	1.0006	1.02803	1.02656		1.00263	0.0535894
80	1.02143	1.08141	1.04434	1.06531	0.895704	0.91683	0.984049	0.985205	1.00524	1.01926	0.969991	1.0019	0.992943	0.941739	1.01782	1.00741	0.982223	0.98343	0.956556	1.01458	1.00686	1.06319	1.01315	0.972513	1.016	0.98616	0.988484	1.04373	1.02657	0.996032	1.00214	1.04578	1.01083	1.00238	1.00481	0.994233	1.01222	1.00332	1.00341	1.0045	1.03766	1.00841	1.03048		1.00373	0.0351429
90	0.901099	1.04389	0.992539	0.897295	0.890523	0.965122	0.984457	0.95669	1.0258	1.02991	1.00887	1.08615	1.02885	0.958801	1.00944	1.01388	0.970236	1.00083	0.990505	1.02127	1.01269	0.973457	0.988727	0.961349	0.969671	0.99521	0.949765	1.01108	1.02305	1.0395	1.0235	0.984604	0.983259	0.969922	0.989647	0.99938	1.02343	0.99414	0.950096	0.999577	0.988581	1.01407	1.03302		0.991951	0.0386955
100	0.929121	0.991663	0.985504	0.831229	0.948259	0.989629	1.00754	1.0016	1.04764	1.04677	1.05595	1.0837	1.05291	0.94382	1.01463	1.00578	0.939132	1.0244	1.03007	1.01933	1.02475	1.03835	0.999486	1.0154	0.986703	1.02135	0.981991	0.996651	1.03217	1.02773	0.98802	0.976476	1.00952	0.990302	0.995414	1.00896	1.00655	0.988058	1.01399	1.00874	1.02731	0.984746	0.98199		1.00124	0.0410503
110	0.924176	0.898234	0.947772	0.791362	0.969571	0.980835	1.0343	1.0709	1.06803	1.05309	1.0542	1.08217	1.07622	1.00499	1.00185	0.973101	0.968097	1.00017	1.02398	1.01646	0.994108	1.11767	1.04102	1.01431	1.00873	0.996467	0.974548	1.00601	1.00847	0.99884	0.979864	0.907175	0.996623	0.995282	0.971192	0.981222	0.984986	0.973635	0.99533	1.00475	1.00483	0.998651	0.995859		0.997421	0.0541156
120	0.817582	0.76361	0.846728	0.742098	1.01337	1.05017	1.05248	1.09545	1.08461	1.05599	1.03382	1.11349	1.08457	0.9201	0.978293	1.0075	0.940039	1.01845	1.03012	0.996342	1.04203	0.962774	0.998427	1.01063	1.02667	0.991942	0.952378	1.00319	1.00069	0.972552	0.975056	0.945039	0.992858	0.99187	0.956691	0.957486	1.0015	0.956978	0.963674	0.969688	1.0055	1.01048	0.99533		0.984378	0.0764138
130	0.764835	0.765817	0.787252	0.689131	1.05941	1.10639	1.08834	1.16117	1.17954	1.19134	1.06955	1.11084	1.14703	0.96546	0.980889	0.972498	0.988833	1.00083	1.01386	0.980718	1.02994	1.12248	1.00804	1.01676	1.03678	0.991062	0.959741	1.01217	0.996581	1.00694	0.995689	0.926418	0.943074	0.928425	1.02853	0.992875	1.04143	0.975572	0.950845	0.989387	1.00539	1.05758	1.03948		1.00184	0.104086
140	0.768681	0.723149	0.734172	0.651258	1.05513	1.11346	1.07056	1.14966	1.11391	1.091	1.06169	1.11532	1.13306	0.943404	0.989674	1.01086	0.976132	1.00744	0.999668	0.95041	0.969989	1.06559	1.0076	1.00342	1.0202	1.00263	0.97724	1.00576	0.972728	0.979841	0.992585	0.955366	0.997281	1.02285	1.02507	0.967853	0.947894	0.955363	0.961425	0.998602	0.996816	0.963271	0.990777		0.986949	0.102383
150	0.776923	0.737126	0.702196	0.656099	1.09238	1.16478	1.09549	1.21317	1.13575	1.12164	1.08838	1.11308	1.13768	0.951311	1.01503	1.02242	0.993693	0.966909	1.00041	0.931703	0.964416	1.07921	0.993401	1.02194	1.01691	1.00753	0.964413	0.992803	0.986636	0.999915	0.983151	0.931893	1.00058	1.00985	1.0521	0.99266	0.989299	0.960261	0.953178	1.00094	0.996259	0.967365	0.999776		0.994898	0.111193
160	0.796154	0.704022	0.672778	0.67888	1.12924	1.16406	1.08098	1.22232	1.16575	1.19	1.0873	1.10594	1.08158	0.940491	1.01862	0.986637	0.996868	0.977813	0.987857	0.922558	0.93951	1.10031	1.00663	1.00614	1.03223	0.995084	0.962354	1.00941	0.98529	0.987638	0.974934	0.917128	0.950038	0.982279	0.978277	0.986941	0.980304	0.952027	0.952678	0.988411	0.985131	0.980317	0.980507		0.989382	0.116254
170	0.814286	0.706964	0.743765	0.691125	1.15969	1.23109	1.12991	1.26044	1.13008	1.14159	1.07092	1.09003	1.15837	1.01207	0.987677	0.974136	0.992203	0.962504	0.975781	0.926268	0.949932	1.0023	0.994635	1.00206	1.04041	0.968689	0.957287	1.01345	0.964354	0.980887	0.965561	0.875614	0.923123	0.967433	1.04254	0.971928	0.951591	0.953211	0.909109	0.981146	0.974781	1.02568	1.00539		0.990233	0.116911
180	0.83022	0.727563	0.780217	0.699098	1.18297	1.21826	1.11724	1.3177	1.15301	1.14689	1.08005	1.13521	1.10913	0.96005	0.997061	0.975601	0.995766	0.922083	0.955232	0.874223	0.916367	0.995089	0.974441	1.01009	1.02894	0.993576	0.948735	1.00448	0.952913	0.986712	0.9683	0.914972	0.906654	0.928794	1.05753	0.908801	0.957259	0.927701	0.90611	0.985291	1.00438	0.981045	0.981884		0.986457	0.119686
190	0.926923	0.759196	0.841612	0.798766	1.21362	1.21249	1.1245	1.33683	1.12987	1.1284	1.08782	1.16969	1.16411	0.975031	0.988875	0.950685	0.991425	0.93607	0.947552	0.888593	0.917091	0.961706	0.957157	1.00396	1.01191	0.976859	0.953169	1.04783	0.956278	0.973	0.965317	0.854173	0.920864	0.978037	1.06347	0.927245	0.932367	0.932706	0.921689	0.982804	0.978898	0.935966	0.944298		0.992299	0.113923
200	0.936813	0.833497	0.895971	0.828097	1.21166	1.23051	1.11571	1.28819	1.11706	1.1258	1.06051	1.1245	1.1464	0.913858	0.9743	0.951289	0.997127	0.926158	0.95645	0.896013	0.925908	0.955029	0.95654	1.03228	1.01986	1.00853	0.951665	1.02987	0.980729	0.976197	0.961239	0.917211	0.907218	0.974349	1.0666	0.940042	0.914991	0.932437	0.979086	0.977489	0.984129	0.958001	0.963356		0.996341	0.100174
210	1.02253	0.926189	1.00725	0.919791	1.25397	1.23167	1.13062	1.36436	1.1581	1.16263	1.05708	1.10237	1.1307	0.883479	0.992069	0.929132	0.981835	0.91173	0.884103	0.899723	0.906291	0.894672	0.947898	0.982316	0.998625	0.978493	0.911283	1.03731	0.952988	0.974882	0.949492	0.870098	0.898937	0.973519	1.03381	0.896433	0.902298	0.905796	0.934101	0.950866	0.969216	0.918865	0.953721		0.992819	0.11162
220	1.03462	0.941638	1.11277	0.994684	1.27057	1.19188	1.14012	1.33607	1.13757	1.1518	1.07435	0.981199	1.09529	0.931752	0.979092	0.928873	0.979632	0.914263	0.928751	0.850604	0.910479	0.804137	0.914211	1.02071	0.987838	0.95612	0.904949	1.04078	0.955456	0.976705	0.958683	0.866158	0.86788	0.912564	1.04485	0.948121	0.973279	0.919843	0.900779	0.952817	0.977897	0.912641	0.956474		0.991602	0.1099
230	1.16319	0.964443	1.15114	1.13963	1.29573	1.23686	1.17853	1.38601	1.13305	1.147	1.09831	0.984871	1.11486	0.88556	0.96332	0.922148	0.985723	0.953583	0.93786	0.83801	0.922696	0.978798	0.926998	0.98218	0.986362	0.995838	0.903286	1.05078	0.911564	0.957198	0.94298	0.861513	0.915218	0.991316	1.03216	0.944904	0.952453	0.9055	0.88895	0.926438	0.938612	0.860104	0.932122		1.00437	0.122835
240	1.21319	0.923247	1.31806	0.988989	1.27705	1.18626	1.15075	1.29986	1.11194	1.12547	1.06828	1.07952	1.12608	0.822305	0.954934	0.904906	0.977493	0.916466	0.873246	0.851126	0.893004	0.944079	0.927615	0.994705	0.965356	0.948956	0.874385	1.0443	0.941922	0.961739	0.949614	0.862757	0.894325	0.947883	1.03776	0.941973	0.926082	0.935504	0.925604	0.949989	0.965655	0.896044	0.959438		0.996694	0.123185
250	1.22967	0.94973	1.3366	1.1177	1.29334	1.19519	1.12981	1.21225	1.10346	1.10703	1.08367	1.0374	1.10676	0.874324	0.966115	0.898612	0.971791	0.898513	0.872716	0.864765	0.888469	0.922447	0.913946	0.997973	0.953093	0.913512	0.87486	1.04392	0.870438	0.971985	0.945049	0.833436	0.904583	0.953139	1.06083	0.977075	0.973403	0.940725	0.838883	0.92161	0.916799	0.930695	0.952768		0.994165	0.124313
260	1.27637	0.962236	1.39672	1.2373	1.29204	1.18265	1.15636	1.22979	1.08968	1.11229	1.06263	0.993948	1.04917	0.82397	0.944353	0.908268	0.958701	0.901377	0.887917	0.869781	0.85799	0.95129	0.9225	0.983269	0.950709	0.935633	0.866705	1.02307	0.941697	0.917438	0.92472	0.936662	0.892067	0.90113	1.05309	0.962491	0.977592	0.935773	0.911609	0.951208	0.939725	0.930078	0.940592		0.998665	0.131287
270	1.29505	0.974743	1.45491	1.22962	1.30601	1.18582	1.13931	1.18305	1.11846	1.14378	1.07209	0.977731	1.00329	0.878069	0.966913	0.868437	0.950602	0.902258	0.87367	0.858337	0.862587	1.00871	0.932289	0.986264	0.940036	0.937393	0.859895	1.03083	0.872607	0.940201	0.944075	0.892328	0.84567	0.859079	1.03216	0.921312	0.954548	0.93249	0.862958	0.915662	0.932268	0.933218	0.934558		0.993333	0.140691
280	1.29725	1.09465	1.47602	1.30593	1.31477	1.19707	1.17169	1.23421	1.09382	1.12826	1.07449	0.984871	1.03533	0.997919	0.971505	0.847314	0.931939	0.917787	0.882991	0.830224	0.886895	1.0031	0.914828	0.978095	0.950482	0.931988	0.857045	1.04264	0.918518	0.945817	0.927337	0.888636	0.81245	0.70425	1.04765	0.955199	0.992627	0.914757	0.917357	0.935604	0.953636	0.923406	0.914018		1.00243	0.153341
290	1.2478	1.10937	1.36538	1.3421	1.28337	1.17343	1.11918	1.25587	1.07703	1.08701	1.07106	0.969469	1.00641	1.01789	0.942156	0.860074	0.916323	0.952481	0.913021	0.838115	0.874458	1.05625	0.933171	0.995522	0.932315	0.923064	0.851423	1.03616	0.921733	0.942053	0.927703	0.86678	0.933098	0.914316	1.03661	0.975645	1.00138	0.934509	0.841049	0.921903	0.930042	0.88926	0.897607		1.00194	0.135083
300	1.27912	1.1182	1.44276	1.36716	1.28219	1.16781	1.12766	1.28225	1.10486	1.16303	1.07275	0.984871	1.07821	1.05368	0.950143	0.861109	0.922025	0.961953	0.944957	0.834143	0.915832	0.964109	0.915269	1.01322	0.956159	0.929474	0.881432	1.01147	0.931453	0.929447	0.928616	0.898548	0.9187	0.876508	1.04518	0.949551	1.00581	0.914004	0.85921	0.935556	0.932046	0.903277	0.882361		1.01154	0.144768
310	1.21484	1.09318	1.49584	1.3515	1.31657	1.23268	1.12684	1.32997	1.09979	1.16244	1.04187	0.963656	1.04081	1.02497	0.967113	0.838779	0.918396	0.982329	0.967413	0.837226	0.919736	1.06613	0.918179	1.01785	0.954115	0.931988	0.864884	1.0132	0.925172	0.882726	0.930381	0.929736	0.940439	0.947422	0.997885	0.944761	0.967364	0.891131	0.885034	0.937945	0.947626	0.844965	0.856104		1.01212	0.151149
320	1.23187	1.09833	1.57259	1.29682	1.30794	1.25906	1.1198	1.3116	1.07907	1.15292	1.02808	1.02383	1.07422	1.01457	0.954535	0.793603	0.871288	0.950719	0.890935	0.828186	0.866617	1.10192	0.907509	0.972513	0.923118	0.905216	0.831549	1.02051	0.954783	0.924189	0.937198	0.89465	0.948627	0.949819	1.03166	0.964135	0.976853	0.92022	0.866041	0.930875	0.93071	0.878719	0.86828		1.0085	0.159568
330	1.22033	1.06523	1.43445	1.38652	1.32525	1.24695	1.10958	1.35414	1.07424	1.12523	1.02398	1.05617	1.065	1.01581	0.960724	0.819898	0.880878	0.957548	0.929492	0.752626	0.811421	1.03168	0.901336	1.00832	0.941285	0.91414	0.856332	0.988313	0.949698	0.921919	0.943345	0.887683	0.965378	0.981634	1.02079	0.917666	0.961942	0.883865	0.880203	0.932825	0.9523	0.823266	0.824342		1.00241	0.158095
340	1.16099	1.07626	1.36858	1.31277	1.29338	1.25343	1.08027	1.2747	1.0016	1.03272	0.993198	1.01833	1.01214	0.995839	0.927981	0.835589	0.88347	0.90391	0.885798	0.766264	0.817246	1.06506	0.915181	1.02289	0.941853	0.892396	0.866705	0.966636	0.944539	0.929267	0.937624	0.875614	0.966413	0.970476	1.00514	0.960346	1.02775	0.886314	0.824971	0.92361	0.935162	0.908548	0.869233		0.989074	0.138604
350	1.24231	1.06964	1.50224	1.33612	1.29954	1.2703	1.08609	1.31564	1.01597	1.0628	1.00972	1.02975	1.04306	1.01248	0.942156	0.796534	0.889755	0.91184	0.869009	0.751058	0.824551	1.072	0.895869	0.987626	0.911309	0.879198	0.847306	0.961633	0.939006	0.910717	0.915895	0.839947	0.954273	0.933774	0.986845	0.948121	0.971554	0.869442	0.835218	0.905471	0.935384	0.87014	0.855257		0.988524	0.160935
360	1.22418	1.07994	1.50096	1.42952	1.27948	1.29264	1.07741	1.33691	1.03447	1.09188	0.989338	1.07687	1.06562	0.969205	0.940759	0.810501	0.890144	0.87979	0.815146	0.749909	0.805942	1.0469	0.885904	0.967067	0.901317	0.841114	0.831786	0.958106	0.97056	0.864295	0.848152	0.852431	0.976859	0.97149	1.0053	0.965708	0.989423	0.884888	0.845964	0.921269	0.933604	0.81637	0.821166		0.986984	0.172564
370	1.24286	1.07479	1.50991	1.3925	1.26363	1.27909	1.07679	1.30977	1.03056	1.07218	1.03674	1.0784	1.07697	1.00291	0.938563	0.83033	0.909519	0.865471	0.81843	0.765637	0.812491	0.85755	0.84578	0.954814	0.889054	0.836841	0.839625	0.972664	0.947829	0.836275	0.86276	0.787941	0.976765	0.983017	0.983715	0.989229	1.00088	0.911743	0.818807	0.932533	0.939836	0.867056	0.849646		0.983068	0.169885
380	1.22143	1.07258	1.43061	1.39051	1.26182	1.29423	1.07669	1.29437	1.04951	1.09939	1.03434	1.06708	1.08819	0.953392	0.929179	0.829209	0.928959	0.850493	0.803494	0.73904	0.777667	0.840725	0.830524	0.974828	0.885762	0.831059	0.845089	0.965032	0.96398	0.868059	0.864281	0.823275	0.978742	0.987074	0.983385	0.956414	0.955041	0.878833	0.849213	0.917612	0.930933	0.906641	0.862986		0.978876	0.164574
390	1.16923	1.03286	1.35643	1.31989	1.28851	1.29293	1.08507	1.27958	1.00584	1.07634	1.03043	1.05688	1.06924	0.870162	0.947148	0.828692	0.922025	0.866573	0.803124	0.736166	0.788844	0.789181	0.828936	1.00805	0.879403	0.816228	0.840179	0.924948	0.926818	0.871405	0.875359	0.822031	0.939404	0.95858	0.93939	0.942044	0.959847	0.870599	0.840216	0.889331	0.920138	0.882588	0.856845		0.962964	0.156356
400	1.17033	1.01079	1.35643	1.35719	1.2951	1.27837	1.07404	1.3344	1.01296	1.07824	1.02483	1.0987	1.08058	0.864752	0.944353	0.844297	0.935633	0.873622	0.811227	0.767571	0.803423	0.832713	0.843134	0.985583	0.866913	0.83659	0.848414	0.926295	0.933098	0.864146	0.870551	0.802581	0.935733	0.94484	0.945487	0.955699	0.963667	0.863064	0.802395	0.88387	0.900662	0.860945	0.847423		0.965829	0.159918
410	1.1544	1.01226	1.35195	1.31989	1.29157	1.27866	1.06515	1.29902	1.02604	1.0873	1.02963	1.09197	1.0382	0.886392	0.914006	0.837141	0.932458	0.857762	0.810856	0.778596	0.799424	0.840725	0.839607	0.984086	0.849427	0.860848	0.849523	0.929117	0.933098	0.850255	0.856247	0.821824	0.94345	0.940413	0.970038	0.964564	0.962558	0.861638	0.804561	0.891672	0.905448	0.87984	0.86161		0.964261	0.153498
420	1.17143	1.06302	1.42038	1.25952	1.28831	1.27535	1.05136	1.24001	1.01465	1.08971	1.06141	1.13185	1.01488	0.883063	0.914605	0.808346	0.922608	0.86404	0.805666	0.76177	0.81479	0.882654	0.839607	0.981499	0.879176	0.833824	0.785862	0.93739	0.931753	0.867581	0.862455	0.799802	0.944109	0.948252	0.966907	0.966137	0.960463	0.862311	0.796064	0.876849	0.903333	0.880681	0.862351		0.963391	0.155875
430	1.17692	0.999755	1.41398	1.30195	1.26834	1.27996	1.05984	1.24443	1.03002	1.09339	1.05326	1.14215	1.06936	0.853516	0.907816	0.834468	0.937707	0.871199	0.818853	0.780687	0.818474	0.960637	0.865621	0.977006	0.866572	0.860722	0.820701	0.948422	0.932276	0.86546	0.856247	0.814939	0.936486	0.942903	0.967237	0.938827	0.921646	0.867989	0.794565	0.844082	0.865495	0.892736	0.869233		0.966648	0.154883
440	1.11923	1.03286	1.45044	1.33099	1.24981	1.20889	1.07312	1.1829	1.02341	1.09706	1.06527	1.06463	1.08544	0.83479	0.916002	0.83602	0.901225	0.892676	0.824732	0.774782	0.845993	0.979866	0.850453	0.995795	0.88701	0.835333	0.82664	0.897499	0.925546	0.845595	0.851987	0.826884	0.933663	0.940782	0.964106	0.955413	0.960587	0.84934	0.79898	0.840035	0.872951	0.811828	0.821589		0.96005	0.153269
450	1.08791	0.926189	1.48817	1.26977	1.22964	1.22893	1.06893	1.22217	1.02334	1.10733	1.06743	1.0735	1.10589	0.773616	0.913207	0.840848	0.858911	0.881552	0.853703	0.788107	0.840011	1.01619	0.86518	0.999334	0.890871	0.865121	0.841842	0.922704	0.934968	0.865789	0.848457	0.782715	0.939874	0.926766	0.957186	0.963706	0.975744	0.85082	0.796398	0.842668	0.860932	0.86386	0.851022		0.960728	0.153805
460	1.06923	0.985042	1.43317	1.27205	1.22579	1.18525	1.02971	1.17939	1.02429	1.09073	1.00901	1.06759	1.05714	0.801914	0.89424	0.817139	0.865585	0.899945	0.843163	0.76292	0.816648	1.00604	0.854951	0.994841	0.88156	0.867509	0.828698	0.881722	0.940651	0.853601	0.85363	0.805484	0.959449	0.921417	0.964271	0.940543	0.938282	0.849233	0.781403	0.820531	0.857371	0.891222	0.847317		0.950457	0.144541
470	1.09341	1.01079	1.5809	1.28372	1.24047	1.19966	1.04881	1.25792	1.04608	1.11767	1.07901	1.06841	1.05827	0.806908	0.898632	0.809035	0.864613	0.894768	0.822137	0.763756	0.813688	1.01325	0.854686	0.977006	0.867708	0.860596	0.834954	0.896729	0.941548	0.858679	0.868603	0.762228	0.948156	0.925567	0.995084	0.957343	0.938282	0.862391	0.77782	0.859783	0.885193	0.91494	0.876432		0.963619	0.164296
480	1.10714	1.01226	1.50799	1.24983	1.24404	1.20341	1.03481	1.22247	1.04072	1.0955	1.0624	1.03067	1.07834	0.881398	0.892842	0.800845	0.867983	0.896751	0.84989	0.752574	0.794071	0.980667	0.860595	0.966795	0.859987	0.862733	0.838042	0.900321	0.936688	0.872211	0.873289	0.818506	0.96726	0.946315	1.00876	1.01489	0.983015	0.870249	0.773905	0.869925	0.892649	0.891727	0.878973		0.964964	0.151527
490	1.08901	0.975478	1.49776	1.25382	1.20597	1.20384	1.01214	1.14287	1.01505	1.08012	1.05397	1.06749	1.04966	0.783188	0.898233	0.804293	0.894745	0.878137	0.833577	0.745519	0.788719	1.01832	0.848866	0.941743	0.876791	0.859842	0.861875	0.885185	0.920611	0.822504	0.835492	0.733031	0.933569	0.921601	0.950924	0.92939	0.891947	0.816915	0.775904	0.856272	0.875622	0.879504	0.841388		0.943044	0.152753
500	1.07308	0.982835	1.48049	1.2897	1.20644	1.20312	1.02378	1.21195	1.01645	1.1029	1.07515	1.07228	1.06649	0.841032	0.892244	0.803604	0.874916	0.867124	0.831564	0.722632	0.783019	0.975326	0.842252	0.938067	0.86169	0.853432	0.825056	0.901026	0.92779	0.817246	0.829162	0.770149	0.913806	0.848014	0.971521	0.959274	0.946045	0.832764	0.773239	0.85242	0.88319	0.883821	0.852928		0.946024	0.156497
510	1.04066	0.974007	1.57259	1.09407	1.2283	1.2246	1.03308	1.26913	1.02478	1.10569	1.076	1.05525	1.0377	0.836871	0.875672	0.78455	0.91237	0.841902	0.81075	0.689345	0.768504	0.958501	0.827702	0.935208	0.862031	0.855443	0.839625	0.932516	0.891225	0.850584	0.844561	0.746717	0.959543	0.92778	0.993931	0.963921	0.936433	0.842963	0.752496	0.842717	0.881298	0.912697	0.856845		0.945827	0.162672
520	1.15165	1.00417	1.59305	1.08524	1.26335	1.27016	1.03747	1.33859	1.04212	1.1385	1.09582	1.0783	1.07235	0.882647	0.889848	0.795672	0.899864	0.806767	0.789194	0.695982	0.775872	0.972121	0.832905	0.954541	0.875656	0.824272	0.853403	0.918856	0.921359	0.82797	0.844561	0.805027	0.938463	0.862399	0.978771	0.974001	0.965023	0.832334	0.738834	0.849251	0.861822	0.869187	0.843929		0.954681	0.17617
530	1.17473	0.945316	1.60456	1.16383	1.29632	1.28053	1.03553	1.35567	1.02076	1.11298	1.1009	1.12063	1.03782	0.786933	0.889848	0.817657	0.913796	0.819984	0.817847	0.722684	0.797126	0.904019	0.823557	0.970335	0.882355	0.860722	0.870901	0.89038	0.912162	0.848732	0.855943	0.800382	0.94505	0.887851	0.982561	0.998951	0.995707	0.842721	0.735751	0.836914	0.857593	0.900081	0.859492		0.959945	0.179535
540	1.08407	0.929132	1.61735	1.16526	1.27293	1.24233	0.983436	1.31938	0.987504	1.07717	1.07059	1.10278	1.07634	0.821473	0.876671	0.774205	0.905048	0.80897	0.77892	0.695041	0.765796	0.987878	0.835197	0.945964	0.872704	0.854438	0.850948	0.874731	0.90446	0.824266	0.860508	0.820746	0.928863	0.825697	0.974487	0.998808	0.982522	0.847995	0.728587	0.852664	0.856592	0.820295	0.822118		0.944764	0.177892
550	1.13791	0.896027	1.61288	1.22421	1.28615	1.2739	1.0198	1.32624	1.01251	1.11119	1.10735	1.09849	1.1024	0.863088	0.880664	0.776705	0.91885	0.818552	0.77929	0.712285	0.777478	0.961439	0.836697	0.952908	0.883491	0.838978	0.876206	0.884159	0.918592	0.791437	0.830684	0.833312	0.948627	0.890064	0.989152	1.01604	1.00852	0.847484	0.723089	0.8257	0.85815	0.906361	0.871139		0.958795	0.181935
560	1.13242	0.859245	1.59369	1.19915	1.28717	1.25877	1.0295	1.34705	1.02343	1.13301	1.10349	1.16336	1.12471	0.824386	0.878867	0.784378	0.904594	0.828905	0.783475	0.713905	0.77011	0.873574	0.822587	0.962438	0.882809	0.844508	0.866309	0.879477	0.900722	0.797321	0.822224	0.81328	0.93611	0.888035	0.937907	0.977933	0.998788	0.809299	0.696431	0.82609	0.856814	0.833303	0.808461		0.948327	0.187073
570	1.09396	0.903384	1.52334	1.21452	1.22591	1.25488	0.974856	1.27432	0.97083	1.04819	1.04978	1.11226	1.04493	0.841864	0.891245	0.781016	0.906538	0.854347	0.811809	0.693212	0.795677	0.934732	0.818707	0.950865	0.882696	0.827917	0.867892	0.886468	0.878962	0.840069	0.853143	0.774877	0.933381	0.910997	0.922583	0.954055	0.937049	0.822566	0.684519	0.810877	0.854366	0.828313	0.802955		0.935927	0.16663
580	1.11209	0.894556	1.58026	1.21965	1.28038	1.24752	0.995693	1.30863	1.00804	1.11135	1.08038	1.11247	1.07946	0.810237	0.875672	0.79412	0.910297	0.81646	0.781886	0.711292	0.773227	0.818024	0.796308	0.952091	0.885194	0.840737	0.868447	0.897627	0.919564	0.839591	0.855699	0.759532	0.916065	0.88739	0.920111	0.960203	0.971184	0.802464	0.706178	0.809853	0.846687	0.863132	0.832388		0.940747	0.180151
590	1.09286	0.896027	1.51311	1.27831	1.29687	1.25502	1.02205	1.32197	1.02116	1.13727	1.08951	1.12042	1.09404	0.809821	0.892244	0.786016	0.90602	0.834082	0.774259	0.733919	0.767528	0.981736	0.825056	0.973466	0.882128	0.83571	0.869001	0.895062	0.887786	0.829135	0.869638	0.761315	0.92764	0.885822	0.91698	0.971713	1.01074	0.804483	0.675022	0.800345	0.850693	0.812108	0.795861		0.946603	0.181053
600	1.04451	0.879843	1.45363	1.27575	1.26386	1.26223	1.0009	1.28217	0.993046	1.10684	1.08782	1.12338	1.07597	0.982938	0.844726	0.749547	0.89319	0.835954	0.78125	0.715838	0.787742	1.02073	0.822763	0.965706	0.876451	0.864367	0.870585	0.910518	0.873354	0.838067	0.87895	0.775706	0.943921	0.910536	0.933623	0.984296	1.00704	0.813497	0.675522	0.812681	0.854811	0.850292	0.820424		0.947557	0.169218
610	1.06209	0.877636	1.54125	1.27005	1.25868	1.26468	1.00826	1.31015	1.01446	1.15263	1.09135	1.14929	1.09965	1.01498	0.836341	0.764462	0.895522	0.866353	0.808791	0.722632	0.785633	1.01432	0.822675	0.982588	0.885762	0.835207	0.876286	0.877681	0.890702	0.840786	0.881384	0.766333	0.911265	0.851702	0.939719	0.904297	0.970199	0.775824	0.672273	0.817215	0.863714	0.831508	0.808143		0.949173	0.180503
620	1.06813	0.898234	1.43189	1.23104	1.23085	1.27217	0.960556	1.26867	0.986225	1.08572	1.08137	1.12277	1.05689	0.910529	0.891445	0.780757	0.919757	0.861506	0.824679	0.731306	0.79574	1.02874	0.82488	0.965706	0.8886	0.844005	0.888242	0.858826	0.867746	0.839143	0.884367	0.763845	0.930087	0.893476	0.939225	0.90158	0.981166	0.77795	0.688601	0.808244	0.856592	0.864589	0.822224		0.942513	0.160533
630	1.04835	0.934282	1.50608	1.27375	1.25597	1.26439	0.971894	1.28621	0.985609	1.09684	1.08607	1.12052	1.08345	1.01956	0.800204	0.736012	0.898179	0.852805	0.795179	0.714323	0.791993	1.02233	0.828495	0.941471	0.882469	0.807053	0.871693	0.892304	0.86984	0.805865	0.837379	0.743109	0.896301	0.83787	0.904622	0.876415	0.946169	0.757983	0.635535	0.80722	0.844795	0.768262	0.768652		0.931803	0.181718
640	1.03077	0.858509	1.47794	1.25069	1.22277	1.23383	0.9436	1.24961	0.971256	1.0743	1.0656	0.929997	0.954546	0.930087	0.860299	0.763169	0.894097	0.860295	0.8027	0.708105	0.769921	1.03729	0.81809	0.93725	0.889849	0.823518	0.864567	0.901539	0.876794	0.808075	0.817111	0.725856	0.887737	0.833628	0.901656	0.874914	1.00113	0.754512	0.602047	0.798589	0.836448	0.835433	0.81079		0.918346	0.168044
650	1.01264	0.913683	1.50416	1.22392	1.27222	1.26165	0.955857	1.27569	0.976633	1.08655	1.08701	0.952436	0.985588	0.875572	0.885855	0.742478	0.884442	0.835183	0.803971	0.657052	0.753422	1.05785	0.837931	0.941063	0.883264	0.830808	0.867734	0.904938	0.867298	0.810525	0.816076	0.717478	0.874092	0.804027	0.907753	0.892072	0.951098	0.750395	0.621873	0.793713	0.829771	0.862066	0.816295		0.920561	0.176391
660	1.01154	0.889407	1.48689	1.24015	1.23329	1.24334	0.96219	1.2657	0.981322	1.09483	1.07492	0.94499	0.981723	0.860175	0.879665	0.751013	0.885025	0.842232	0.785646	0.669906	0.728925	1.0266	0.818795	0.935072	0.877813	0.80655	0.85752	0.935659	0.844118	0.803774	0.80433	0.718474	0.872209	0.808453	0.90215	0.86562	0.950358	0.733899	0.635535	0.792299	0.828992	0.843339	0.811319		0.913622	0.173683
670	1.02418	0.906327	1.56171	1.22591	1.23941	1.2246	0.961475	1.30969	0.951077	1.05288	1.05849	0.921021	1.00491	0.898044	0.868685	0.738684	0.867788	0.837386	0.790624	0.659299	0.725052	1.00978	0.810418	0.93834	0.877813	0.793855	0.883491	0.931875	0.860419	0.796097	0.815407	0.713829	0.866563	0.813433	0.91352	0.843815	0.999158	0.740277	0.601213	0.793031	0.828658	0.844292	0.816719		0.914401	0.181905
680	1.04176	0.881314	1.46515	1.25838	1.22614	1.20831	0.965663	1.2962	0.965335	1.08939	1.07685	0.95621	1.0261	0.910945	0.874874	0.741357	0.873296	0.781105	0.745818	0.637561	0.71973	1.01058	0.809007	0.893683	0.820246	0.73365	0.87494	0.931875	0.819592	0.805626	0.795504	0.695	0.863457	0.800338	0.904622	0.854253	0.974388	0.738958	0.603546	0.784108	0.815637	0.826462	0.809519		0.904802	0.18112
690	1.04341	0.840853	1.49456	1.23787	1.23843	1.20312	0.951567	1.28644	0.966946	1.07639	1.07233	0.906844	1.02286	0.886808	0.881263	0.717217	0.865909	0.772845	0.713299	0.649945	0.714504	0.766747	0.749482	0.88919	0.833872	0.750115	0.886817	0.914879	0.836042	0.78352	0.801408	0.714741	0.882185	0.810297	0.902974	0.869337	0.966871	0.73145	0.647365	0.791275	0.833777	0.730303	0.767911		0.893116	0.183194
700	1.01209	0.857038	1.38009	1.23275	1.23843	1.19289	0.968523	1.28087	0.967443	1.09652	1.0888	0.940095	0.979354	0.880566	0.882261	0.733339	0.874333	0.758637	0.717112	0.657261	0.704837	0.698645	0.7486	0.892866	0.842615	0.765952	0.883808	0.930207	0.805535	0.78364	0.772862	0.682724	0.858375	0.794713	0.908741	0.876701	0.996817	0.740815	0.596298	0.787326	0.814191	0.72935	0.750865		0.88616	0.179108
710	1.01648	0.836439	1.35003	1.22762	1.21715	1.21437	0.939923	1.26692	0.934166	1.05655	1.04418	1.02332	1.05328	0.843945	0.874874	0.709975	0.86254	0.768109	0.702071	0.672049	0.75128	0.731762	0.744632	0.888101	0.849541	0.787445	0.868368	0.917894	0.823256	0.785671	0.829406	0.743357	0.901289	0.81417	0.929503	0.935967	1.019	0.750287	0.63262	0.796785	0.820311	0.728902	0.761135		0.893597	0.170379
720	1.00055	0.806278	1.28672	1.25553	1.20915	1.21494	0.9436	1.25449	0.939448	1.05846	1.01462	1.12042	1.09267	0.844777	0.885655	0.732649	0.831436	0.75313	0.696616	0.660814	0.729082	0.682087	0.734931	0.898992	0.855445	0.771357	0.864725	0.893009	0.768223	0.795768	0.86629	0.744685	0.898278	0.827265	0.90248	0.897791	0.941609	0.751525	0.646531	0.801076	0.825876	0.747292	0.781357		0.889015	0.170215
730	0.978022	0.812898	1.3398	1.21737	1.22987	1.20298	0.940536	1.2644	0.943995	1.07055	1.01085	1.06382	1.0645	0.952143	0.862895	0.741185	0.833251	0.787603	0.732048	0.656372	0.723414	0.802267	0.7695	0.916964	0.840684	0.772237	0.889034	0.899808	0.788561	0.76252	0.820094	0.759988	0.871927	0.763729	0.930327	0.940686	0.995831	0.752332	0.624372	0.799272	0.8202	0.707035	0.748006		0.893113	0.169949
740	0.995604	0.819519	1.34875	1.25524	1.24353	1.20759	0.943089	1.28225	0.965453	1.08682	1.04705	1.06484	1.05527	0.948398	0.851515	0.738253	0.816144	0.79333	0.735596	0.665883	0.746557	0.902684	0.790488	0.911927	0.821268	0.76922	0.857916	0.920331	0.832005	0.781967	0.818024	0.722787	0.874844	0.807439	0.884849	0.906227	0.965639	0.738474	0.581304	0.786936	0.815749	0.704736	0.751076		0.896664	0.174982
750	1.02088	0.835704	1.38265	1.20712	1.2641	1.19419	0.939821	1.25808	0.930732	1.04843	1.00271	1.08024	1.08794	0.870162	0.87707	0.727735	0.763203	0.773616	0.732366	0.658358	0.70553	0.917373	0.788548	0.89164	0.824788	0.777641	0.875256	0.8907	0.799478	0.717204	0.755516	0.742196	0.868351	0.787889	0.885178	0.945547	1.01851	0.727979	0.609127	0.784303	0.815303	0.772299	0.778921		0.891497	0.176088
760	1.02637	0.804071	1.39096	1.25952	1.2513	1.18107	0.961373	1.28972	0.971777	1.10872	1.05091	1.05311	1.066	0.832709	0.870881	0.747133	0.749012	0.798066	0.734008	0.666458	0.72077	0.823899	0.764738	0.895861	0.840798	0.772237	0.840813	0.900064	0.842473	0.741639	0.788139	0.727681	0.893384	0.839714	0.848104	0.957844	0.998419	0.750529	0.616542	0.788935	0.806734	0.766019	0.792897		0.896079	0.178758
770	0.971978	0.813634	1.34556	1.18548	1.20165	1.16074	0.901313	1.22224	0.922632	1.04894	0.982371	1.03556	1.00678	0.79484	0.858702	0.745495	0.735339	0.793661	0.736973	0.661755	0.712772	0.854879	0.776819	0.879795	0.839662	0.783926	0.832182	0.889033	0.83021	0.747763	0.81425	0.721584	0.877856	0.865811	0.858814	0.96485	1.01505	0.741299	0.611877	0.782352	0.798388	0.839414	0.808672		0.883091	0.159445
780	0.913736	0.819519	1.43317	1.19203	1.19517	1.16319	0.918268	1.24107	0.909605	1.02398	1.01245	0.979771	1.05478	0.849771	0.852712	0.724545	0.762166	0.782427	0.725798	0.654439	0.722312	0.831644	0.77144	0.887828	0.833758	0.788702	0.864013	0.891855	0.787514	0.707376	0.782418	0.688489	0.885479	0.851702	0.842501	0.970998	1.00569	0.751821	0.599714	0.787618	0.814747	0.766356	0.798932		0.880035	0.169812
790	0.949451	0.770966	1.34364	1.22221	1.219	1.14906	0.935428	1.25121	0.929453	1.04958	1.02215	1.01241	1.07098	0.915522	0.861697	0.734805	0.778366	0.764364	0.71457	0.631186	0.695611	0.93767	0.78943	0.87326	0.801966	0.785685	0.852215	0.881722	0.762017	0.703044	0.755272	0.705078	0.868633	0.856036	0.830473	0.959846	1.00976	0.753543	0.606712	0.773088	0.803284	0.833247	0.811107		0.883134	0.169848
800	0.937363	0.820991	1.30654	1.2205	1.21841	1.15844	0.924499	1.26425	0.919529	1.05752	1.02582	1.07279	1.07559	0.928839	0.822166	0.734805	0.783679	0.757976	0.707473	0.617338	0.704302	0.958501	0.79719	0.88211	0.839322	0.750995	0.870822	0.884672	0.806881	0.721774	0.779801	0.703419	0.855552	0.827911	0.822069	0.948049	0.976114	0.723324	0.595299	0.752755	0.790597	0.763048	0.76357		0.880758	0.171635
810	0.932418	0.751103	1.35387	1.21595	1.19435	1.15901	0.893754	1.15431	0.924005	1.03331	1.02102	1.05657	1.06226	0.89638	0.830351	0.750841	0.80597	0.765245	0.710863	0.614307	0.725493	0.9131	0.770911	0.88211	0.821609	0.797752	0.847543	0.885762	0.819368	0.727331	0.795504	0.72005	0.865057	0.835288	0.833274	0.943903	0.95689	0.729674	0.599714	0.751731	0.79605	0.835209	0.803273		0.878662	0.162611
820	0.928571	0.745954	1.4159	1.20114	1.22273	1.11072	0.903458	1.25114	0.925166	1.04993	1.05242	1.04372	1.08357	0.841448	0.869084	0.716872	0.799814	0.75357	0.70599	0.630036	0.702161	0.921112	0.794015	0.879932	0.824561	0.796997	0.869159	0.884223	0.802843	0.727181	0.818755	0.677706	0.87955	0.859079	0.850081	0.965565	1.00162	0.746008	0.573556	0.735689	0.755319	0.789569	0.795226		0.881422	0.176181
830	0.956593	0.806278	1.37242	1.19601	1.19596	1.09948	0.905092	1.24824	0.913987	1.03253	1.0181	1.06657	1.07547	0.853933	0.832148	0.711958	0.82204	0.759518	0.722938	0.664211	0.686228	0.922714	0.786167	0.878162	0.836483	0.762307	0.848018	0.864149	0.741828	0.756426	0.823563	0.681646	0.876633	0.852624	0.818609	0.963992	0.983631	0.749318	0.593966	0.733836	0.77268	0.838629	0.806025		0.879793	0.167479
840	0.933516	0.765081	1.32701	1.1963	1.17904	1.12614	0.894673	1.2195	0.890894	1.00739	0.998941	1.04107	1.04368	0.832293	0.87128	0.728252	0.831177	0.760509	0.731465	0.645085	0.70279	0.921913	0.794985	0.883608	0.830352	0.78204	0.851977	0.855875	0.78415	0.727271	0.819241	0.721875	0.866469	0.862491	0.842996	0.946906	0.964653	0.73328	0.588218	0.711163	0.735175	0.799941	0.790356		0.873047	0.16043
850	0.925275	0.807013	1.32125	1.1701	1.15852	1.10639	0.874142	1.22796	0.867423	0.986988	0.982936	1.08064	1.05266	0.82397	0.826758	0.719631	0.792751	0.764694	0.725904	0.647489	0.710253	0.865562	0.785461	0.875847	0.824334	0.768843	0.850394	0.837789	0.755586	0.670992	0.737135	0.750532	0.846235	0.819888	0.871667	0.967281	1.01505	0.733792	0.559727	0.720232	0.756988	0.845694	0.813331		0.866166	0.162126
860	0.895604	0.782737	1.35515	1.18548	1.15903	1.12859	0.893754	1.23452	0.902595	1.032	0.961706	1.10502	1.0731	0.844777	0.854709	0.70963	0.81394	0.763593	0.720767	0.643204	0.708238	0.843395	0.771616	0.896406	0.829103	0.781286	0.85942	0.831633	0.768148	0.684046	0.760446	0.742943	0.840024	0.843772	0.857661	0.962491	1.0169	0.71961	0.551814	0.705019	0.725938	0.81166	0.799779		0.869099	0.169555
870	0.924725	0.782001	1.35515	1.18605	1.17979	1.12859	0.916634	1.20981	0.933361	1.05827	0.997529	1.04576	1.07123	0.738244	0.846124	0.727821	0.850811	0.764694	0.727864	0.666196	0.71951	0.824167	0.781405	0.906753	0.830919	0.804664	0.870743	0.828298	0.755586	0.640671	0.700737	0.748127	0.837765	0.792961	0.849587	0.940185	0.989053	0.715412	0.579138	0.707408	0.745414	0.825173	0.775745		0.866979	0.169245
880	0.906044	0.765081	1.27968	1.17864	1.18917	1.13378	0.905092	1.21393	0.909724	1.04025	0.969144	1.07279	1.05515	0.809405	0.844327	0.723338	0.827354	0.773726	0.722356	0.654596	0.721368	0.821496	0.770558	0.868087	0.817862	0.779527	0.863854	0.840996	0.761419	0.688407	0.767445	0.74315	0.855364	0.851425	0.858649	0.978433	1.03662	0.722247	0.56206	0.727839	0.761551	0.832742	0.792368		0.869699	0.161912
890	0.893956	0.755517	1.38009	1.08552	1.19839	1.11418	0.90785	1.22804	0.910837	1.04942	1.00012	1.06494	1.04592	0.722846	0.843129	0.720407	0.805905	0.801371	0.74836	0.659246	0.725807	0.922981	0.793045	0.889598	0.824561	0.779652	0.859262	0.833749	0.735996	0.619641	0.702381	0.766292	0.856775	0.813802	0.832944	0.963206	1.00865	0.7163	0.560894	0.744319	0.783141	0.828313	0.790568		0.867161	0.168595
900	0.949451	0.726091	1.39032	1.11372	1.16142	1.15382	0.896512	1.22994	0.921732	1.06446	0.965189	1.09554	1.08669	0.702871	0.822565	0.667989	0.73359	0.894108	0.831247	0.633642	0.694604	0.907758	0.794456	1.97253	1.03893	0.783674	0.830995	0.851001	0.731659	0.626183	0.728918	0.757334	4.43859	0.815277	7.19133	1.9776	1.57329	0.707824	0.596798	0.705848	0.74764	1.45007	0.795967		1.18045	1.1245
910	0.923077	0.747425	1.39672	1.11343	1.14297	1.1136	0.897533	1.2166	0.90745	1.041	0.977146	1.09625	1.06363	0.76779	0.826558	0.686352	0.820226	0.93574	0.967096	0.647228	0.702224	0.904019	0.783257	2.57499	1.08038	0.793227	0.838517	0.866778	0.736519	0.648139	0.749369	0.760942	6.68019	0.823669	8.74666	2.71668	1.87718	0.718238	0.626372	0.714137	0.744635	2.16024	0.80592		1.33349	1.51753
920	0.79011	0.665768	1.43957	1.0411	0.995789	0.956761	0.799374	1.09202	0.850489	0.917155	0.943583	1.00405	0.946942	0.876821	0.867287	0.673075	0.864678	0.940146	1.05083	0.649527	0.718534	0.937937	0.794897	2.5287	1.11137	0.791844	0.869872	0.87922	0.730911	0.69235	0.809442	0.734192	6.11883	0.774887	8.39354	3.43967	2.10429	0.707178	0.572473	0.714332	0.756543	2.44844	0.81873		1.32124	1.46172
930	0.786813	0.720206	1.39544	1.01633	0.980011	0.965555	0.824501	1.10346	0.865149	0.943078	0.938122	0.98946	0.981349	0.952975	0.889448	0.673506	0.829103	0.897742	0.997867	0.648796	0.721021	0.88666	0.787842	2.06919	1.10331	0.803659	0.899644	0.899102	0.712218	0.646436	0.758985	0.749288	4.39606	0.824867	7.02787	4.19963	2.28643	0.699913	0.560144	0.705555	0.760549	2.6033	0.798402		1.26277	1.21667
940	0.765385	0.650319	1.37433	1.04879	0.992414	0.960221	0.830425	1.09713	0.871663	0.963103	0.927154	1.02516	0.966514	0.98169	0.828555	0.641607	0.796315	0.86404	0.885268	0.641166	0.724233	0.952892	0.791987	1.62249	1.05381	0.776761	0.900435	0.955027	0.754166	0.701222	0.802321	0.734773	2.55621	0.801629	4.45638	4.3138	2.43603	0.673138	0.524656	0.688294	0.759548	2.72693	0.787074		1.15361	0.866429
950	0.779121	0.695929	1.41079	0.973612	0.977028	0.954887	0.8054	1.07647	0.816975	0.884182	0.920376	1.03801	1.00204	1.01748	0.828555	0.640917	0.78193	0.834082	0.817212	0.630454	0.709875	0.927788	0.791811	1.40492	0.990563	0.768969	0.887688	1.06989	0.726574	0.665435	0.766715	0.759242	1.61332	0.799232	2.57216	4.40931	2.38132	0.674322	0.530571	0.690732	0.742298	2.78816	0.774792		1.07747	0.713482
960	0.785714	0.665768	1.40375	0.904414	0.991472	0.966564	0.797739	1.09957	0.82292	0.894423	0.91854	1.0221	0.996309	1.04286	0.790421	0.664195	0.813098	0.837937	0.832465	0.641637	0.743913	0.961973	0.794544	1.2444	0.966719	0.750367	0.892834	1.02282	0.744744	0.705016	0.829041	0.717935	1.17882	0.792869	1.51775	4.22444	2.40498	0.671577	0.517492	0.696047	0.743522	2.74297	0.801155		1.03623	0.64636
970	0.786813	0.651054	1.38201	0.978168	0.983975	0.95013	0.808566	1.11398	0.824341	0.906057	0.906065	1.0425	1.0003	1.0437	0.780439	0.664626	0.832667	0.822958	0.820178	0.645294	0.732042	0.918708	0.784403	1.14801	0.953548	0.763815	0.901465	1.04847	0.732257	0.670125	0.758437	0.703544	1.01036	0.777376	1.02227	3.32057	2.00719	0.664635	0.511161	0.668888	0.716701	2.63896	0.788344		0.981049	0.512846
980	0.763187	0.657675	1.38585	1.01376	1.00203	0.898811	0.800191	1.09499	0.811149	0.876006	0.91002	1.02363	1.00354	1.01789	0.792018	0.637469	0.796509	0.810732	0.761548	0.609343	0.67335	0.984673	0.782816	1.07163	0.875656	0.755017	0.862033	1.25396	0.748184	0.688766	0.788687	0.709806	0.899595	0.747222	0.879906	2.3465	1.59732	0.629921	0.48192	0.655333	0.697671	2.1252	0.850387		0.924928	0.359571
990	0.792857	0.658411	1.3884	0.977883	0.985977	0.912938	0.78538	1.09507	0.795304	0.873486	0.889025	0.99864	0.973371	0.94382	0.838537	0.655488	0.814653	0.804124	0.761389	0.595809	0.664093	0.935533	0.778407	1.06768	0.890985	0.755268	0.869397	1.26307	0.735397	0.648767	0.73044	0.699479	0.891125	0.758657	0.844643	1.99304	1.4577	0.620315	0.469508	0.656893	0.696669	1.76501	0.856422		0.89742	0.294768
1000	0.78956	0.679745	1.35899	1.07641	1.0118	0.925912	0.807239	1.09987	0.798856	0.878044	0.916516	1.01537	0.98272	0.973367	0.82536	0.659626	0.811348	0.818993	0.775106	0.616398	0.690101	0.944613	0.776907	1.0459	0.904951	0.738426	0.883016	1.33098	0.750726	0.681029	0.743221	0.687369	0.842377	0.77959	0.778898	1.72509	1.32819	0.627903	0.478255	0.672642	0.713251	1.51471	0.92037		0.892552	0.249771
1010	0.774725	0.698136	1.39224	1.03227	0.965332	0.86998	0.803357	1.0892	0.80023	0.874425	0.909408	0.998028	0.97175	0.946733	0.846124	0.657643	0.800203	0.750266	0.710016	0.604222	0.719605	0.879182	0.771352	0.9751	0.865891	0.687396	0.895526	1.37415	0.718723	0.647691	0.730926	0.698442	0.826566	0.764282	0.73688	1.51505	1.26719	0.6106	0.478921	0.646897	0.689102	1.42354	1.11306		0.872799	0.235265
1020	0.758242	0.639284	1.33788	1.10261	0.95289	0.869547	0.799374	1.09233	0.800348	0.862066	0.9224	1.00711	0.945321	0.864336	0.841732	0.645918	0.79301	0.735728	0.689307	0.616763	0.698193	0.816689	0.733961	0.968973	0.87259	0.705872	0.853719	1.50261	0.738986	0.685241	0.746021	0.676213	0.821861	0.744363	0.732101	1.40016	1.24463	0.620934	0.480338	0.674885	0.700453	1.21323	1.05134		0.859525	0.222616
1030	0.746154	0.665032	1.40567	1.02857	0.976047	0.878196	0.787014	1.06625	0.820859	0.881957	0.951632	1.00629	0.948812	0.852268	0.830152	0.659367	0.779532	0.748614	0.709592	0.611224	0.715007	0.733097	0.728141	1.01254	0.809005	0.702102	0.863854	1.8134	0.76254	0.657519	0.714249	0.678121	0.817814	0.740121	0.71101	1.29857	1.15813	0.624082	0.472257	0.652358	0.698673	1.17931	1.3084		0.865199	0.250657
1040	0.750549	0.633399	1.27777	1.08382	0.961172	0.87935	0.789261	1.08112	0.811006	0.853247	0.959682	0.942542	0.903933	0.878069	0.827556	0.664281	0.792168	0.78507	0.726858	0.619063	0.713244	0.735501	0.728053	0.968701	0.852379	0.731387	0.87684	2.39254	0.767326	0.693157	0.725449	0.689028	0.81932	0.730347	0.733584	1.26976	1.10366	0.632666	0.505496	0.664695	0.696002	1.05231	1.64011		0.882359	0.314075
1050	0.730769	0.667239	1.32701	1.10375	0.962388	0.897513	0.794164	1.08989	0.806506	0.847885	0.98223	0.961922	0.854566	0.9201	0.801003	0.624881	0.715446	0.768659	0.729241	0.624184	0.688558	0.69918	0.714561	0.966386	0.807643	0.715299	0.858233	2.3166	0.699656	0.690916	0.775114	0.693632	0.803697	0.711535	0.710845	1.18805	1.07852	0.633016	0.497249	0.655186	0.695223	1.03179	1.85948		0.876737	0.323186
1060	0.735714	0.676067	1.29759	1.09606	0.957875	0.913226	0.789363	1.10003	0.791017	0.837591	0.990844	0.961412	0.879998	0.939659	0.815178	0.626175	0.68823	0.778572	0.745765	0.629095	0.713213	0.77556	0.745778	0.968701	0.831033	0.683877	0.884045	1.86106	0.738538	0.679834	0.699703	0.656555	0.791087	0.674556	0.667179	1.10447	1.05584	0.630487	0.485419	0.662549	0.689324	0.896605	1.76335		0.858331	0.268385
1070	0.706593	0.65694	1.32061	1.10062	0.964665	0.914235	0.772612	1.06732	0.779222	0.825072	1.05242	0.901336	0.872643	0.931752	0.789223	0.641176	0.707411	0.80082	0.752491	0.630088	0.726658	0.826303	0.766502	0.979865	0.819679	0.699965	0.808587	1.48523	0.722686	0.660357	0.700981	0.664476	0.807462	0.740398	0.682339	1.11605	1.06287	0.641116	0.506579	0.640754	0.675747	0.92677	1.8724		0.853977	0.249681
1080	0.757692	0.626778	1.41398	1.06445	0.960504	0.898955	0.778332	1.08844	0.801912	0.851585	0.978511	0.974875	0.944947	0.924677	0.82576	0.618846	0.729831	0.7691	0.70599	0.614203	0.712363	0.87117	0.756272	0.978231	0.815477	0.727994	0.800035	1.49042	0.703843	0.709766	0.749429	0.684922	0.79598	0.722047	0.696674	1.07881	1.07704	0.648489	0.508495	0.653772	0.688879	0.865991	1.64879		0.85382	0.231825
1090	0.766484	0.631192	1.41974	1.04281	0.971808	0.897946	0.773021	1.05093	0.824317	0.828718	1.04004	0.873083	0.872144	0.856429	0.821168	0.620312	0.733978	0.777801	0.712346	0.616607	0.722596	0.844464	0.756008	0.956447	0.803215	0.726988	0.845643	1.46073	0.707731	0.684046	0.699703	0.68007	0.777441	0.684884	0.709856	1.03656	1.10501	0.6409	0.507828	0.624175	0.660389	0.883765	1.51412		0.84101	0.219768
1100	0.729121	0.633399	1.41207	1.11827	0.994769	0.907172	0.776902	1.06549	0.83398	0.834187	1.05115	0.970183	0.90867	0.848939	0.794414	0.644193	0.703264	0.7854	0.760436	0.616972	0.7282	0.798528	0.745955	0.997973	0.791519	0.710397	0.826719	1.32752	0.694571	0.70884	0.731048	0.668582	0.789205	0.739845	0.69964	0.995591	1.0519	0.634738	0.507245	0.633147	0.670294	0.80852	1.43312		0.839118	0.206489
1110	0.714286	0.626778	1.38457	1.03256	0.92726	0.863493	0.75249	1.02264	0.853378	0.80813	1.00191	0.940401	0.895331	0.935081	0.795213	0.621864	0.748947	0.806767	0.713511	0.596436	0.707419	0.85301	0.752127	0.964208	0.827172	0.727617	0.84691	1.33425	0.705039	0.691693	0.721553	0.669992	0.75956	0.739199	0.663884	1.0658	0.979071	0.620153	0.508911	0.634317	0.673076	0.777233	1.45017		0.830544	0.202816
1120	0.705495	0.631192	1.51567	1.05619	0.952301	0.876755	0.770978	1.05809	0.922655	0.839173	1.0294	0.989154	0.901939	0.894299	0.817374	0.627037	0.724712	0.79256	0.722197	0.610754	0.712583	0.825769	0.751863	0.980001	0.836143	0.719196	0.863775	1.30783	0.731285	0.670304	0.640116	0.619686	0.787887	0.738	0.690742	1.08295	1.0116	0.634496	0.505163	0.635292	0.694555	0.840984	1.68553		0.846597	0.233611
1130	0.662637	0.643698	1.49329	1.02743	0.935424	0.863348	0.751877	1.02493	0.888147	0.796282	0.975875	0.970489	0.927494	0.873491	0.811385	0.62833	0.716094	0.779673	0.70223	0.608455	0.693502	0.858084	0.757066	0.916011	0.864188	0.714294	0.859341	1.37652	0.725228	0.696682	0.740361	0.649422	0.718058	0.716238	0.664872	1.01754	0.981659	0.634281	0.50258	0.647921	0.695556	0.760244	1.57616		0.833637	0.22153
MAX	1.29725	1.2874	1.61735	1.42952	1.32525	1.29423	1.17853	1.38601	1.17954	1.19134	1.10735	1.16969	1.16411	1.15273	1.01862	1.03474	1.04644	1.045	1.05083	1.05079	1.07305	1.12248	1.04102	2.57499	1.11137	1.02977	1.07614	2.39254	1.05229	1.06877	1.03416	1.17044	6.68019	1.04784	8.74666	4.40931	2.43603	1.0581	1.08163	1.0321	1.03766	2.78816	1.8724		1.67358	1.51346

## Sheet: STIM1_C17_-TG
	cell1	cell2	cell3	cell4	cell5	cell6	cell7	cell8	cell9	cell10	cell11	cell12	cell13	cell14	cell15	cell16	cell17	cell18	cell19	cell20	cell21	cell22	cell23	cell24	cell25	cell26	cell27	cell28	cell29	cell30	cell31	cell32	cell33	cell34	cell35	cell36	cell37	cell38	cell39	cell40	cell41	cell42		Average	Std. Err.
Time [s]	0.771488	1.00223	0.877629	0.8198	0.96071	0.926428	1.08218	1.01125	1.09478	1.13277	1.03774	0.84125	0.954918	0.880247	0.95797	0.971726	1.05921	1.12818	0.975904	0.946412	0.986336	0.971661	0.95647	0.918077	1.02621	0.99673	0.962238	1.0113	1.02795	0.951359	1.00581	0.96444	0.982738	0.996566	1.03235	1.00031	1.04924	0.910389	0.985681	0.88882	0.995373	0.94689		0.976185	0.0746961
0	0.846048	1.00233	0.904593	0.905746	0.951616	0.932574	1.05318	0.998507	1.03482	1.04627	0.981356	0.850772	0.937192	0.877413	0.950179	0.982055	1.06592	1.10615	0.977871	0.97588	0.983487	0.988841	0.944548	0.965201	0.981952	0.95609	0.932031	0.969567	1.05741	0.953919	1.00828	0.999935	0.945646	0.977714	0.955746	0.944658	0.948452	0.895942	0.991635	0.846535	1.01028	0.917998		0.965627	0.0577206
10	0.835692	1.00223	0.922697	1.03072	0.982193	1.04808	1.04903	1.0671	0.988395	1.07589	0.996561	0.885134	0.926688	0.918445	0.944755	0.992088	1.00247	1.07629	0.939594	0.91306	0.987919	0.976305	0.959348	0.950518	0.988004	1.00549	0.986439	1.02134	1.03369	0.974399	1.00292	0.9715	0.975855	0.941424	0.881252	0.921265	0.910032	0.886772	0.967605	0.868399	1.00772	0.931871		0.970171	0.0571458
20	0.930963	1.00122	0.962372	1.00097	0.99467	1.01419	1.07804	1.03084	0.972921	1.09129	0.986424	0.873542	0.861363	0.897702	0.967931	0.980333	0.967386	1.07542	0.946033	0.939229	0.96766	0.958661	0.945062	0.95564	1.01486	1.01635	1.03411	0.997458	1.00351	1.03249	0.997852	0.99209	1.01486	0.975593	0.963671	0.923234	0.876753	0.87333	1.00269	0.818894	0.998062	0.925565		0.972887	0.058525
30	0.912323	1.00091	0.959367	0.985187	0.971781	1.03485	1.00207	1.02496	1.04062	1.09129	1.00543	0.907904	0.876135	0.934993	0.957674	0.996417	0.977759	1.08789	0.99862	1.00446	0.98602	0.977366	0.939923	1.00362	0.967956	1.00374	0.970426	0.952712	1.01345	0.984443	0.991709	0.986207	0.99421	0.969231	0.958388	0.944367	0.909626	0.924208	0.961225	0.917492	0.970929	0.951361		0.977363	0.0439477
40	0.928892	1.00092	0.970769	0.796372	0.919062	0.946575	1.05732	1.0279	0.945841	1.05338	1.0124	0.953652	0.779954	0.990193	0.972566	1.0244	0.981115	1.08238	1.04763	1.06906	0.996307	0.991494	0.957909	0.98552	1.00124	1.05086	1.07779	1.09518	0.972057	0.960417	0.981855	0.980716	0.992298	0.984548	0.959445	0.945303	0.924101	0.951468	1.00418	0.932137	0.988895	1.00467		0.983304	0.0628393
50	0.884363	1.0008	0.912913	0.897347	0.929298	0.978759	0.979972	1.02202	1.05609	1.06167	1.10996	0.959241	0.933581	0.993933	0.98006	1.01796	1.00155	1.04759	1.03404	1.02942	1.01625	1.02731	0.942801	0.986373	0.989895	0.977987	0.998813	1.00027	0.9676	0.937968	0.992204	0.989345	0.980061	1.00458	1.01175	0.974858	0.934383	0.949081	0.965691	0.98453	0.976184	0.978189		0.986112	0.0443289
60	1.01795	0.999877	0.990799	0.9646	0.943181	1.02401	0.966851	1.04946	1.02128	1.08537	0.978822	0.985737	1.0012	0.995633	0.958266	1.00768	0.956709	1.01455	1.04638	1.03878	0.972567	0.951431	1.00673	0.942493	1.00389	1.02003	1.03648	1.08274	0.935325	0.970461	0.997893	0.976402	0.941822	0.993974	0.975294	0.967372	0.973479	0.959005	1.02375	0.936056	0.995862	0.99275		0.992927	0.036871
70	0.965136	0.998531	0.958366	0.981461	0.948365	1.01077	0.944751	0.989688	0.994197	0.997687	1.00036	1.00457	0.920451	1.03292	1.00965	1.02175	0.998809	1.05919	0.995401	0.99044	0.98412	0.970136	1.00971	0.984154	0.976278	1.02528	1.07142	1.05565	0.944956	0.998031	0.998141	0.989541	0.968207	1.00552	1.02179	0.991442	0.983219	1.00988	0.97122	1.11324	0.971418	0.970966		0.996115	0.0354665
80	1.00035	0.998475	0.991416	1.06577	0.96998	1.01666	0.953039	0.995567	1.00967	1.02257	1.04788	1.06315	0.895503	1.05956	0.999685	1.03026	0.984775	1.03397	0.975725	1.00185	0.943287	0.969008	1.03448	1.02581	0.992921	1.03492	1.00336	1.03779	0.951616	0.979716	1.0007	0.991698	0.992298	0.976772	0.93884	0.978084	0.950346	0.978225	0.978663	0.964728	0.995129	1.00892		0.996266	0.0358142
90	0.953745	0.99898	0.957364	1.03981	0.977712	1.02127	0.999309	1.01223	1.0735	0.990577	0.985157	1.01513	0.976256	1.03292	1.02395	1.02553	0.981115	0.985562	1.01883	1.00084	1.01071	0.992423	1.03469	1.00908	0.989895	1.02528	0.998085	0.989833	0.953153	1.00748	0.989524	1.01249	1.00951	1.02155	1.02337	1.02248	1.03422	1.06139	0.961012	1.10272	0.965551	1.0166		1.00716	0.0308908
100	1.05005	0.998017	0.998965	1.08907	0.998711	1.02477	0.973066	1.00341	0.976789	1.00243	1.00353	1.06585	1.05832	1.06251	1.02661	1.00045	1.02901	0.951067	0.998084	0.988188	1.00976	1.00138	1.00221	1.00737	1.00011	1.00531	0.987895	0.982209	0.952128	0.98779	0.992863	1.0117	1.00186	1.00976	1.00911	1.0259	0.994041	1.03099	1.00333	1.03135	1.01578	1.02932		1.00931	0.0277932
110	1.0573	0.999204	1.0559	1.08938	1.04822	1.04108	0.981354	1.023	1.00774	0.96214	0.950946	1.04018	1.0255	1.05129	1.04337	1.0005	0.998809	0.961212	1.00309	1.00364	1.03477	1.0232	1.06531	1.00072	1.00578	1.03334	1.0585	1.06087	1.00766	0.980701	1.0028	1.00739	0.998416	1.02013	0.989559	1.00754	1.00121	0.992672	0.984405	1.00784	0.995006	0.999514		1.01479	0.0304607
120	1.11322	0.998615	1.05158	1.08578	1.02516	1.03451	0.971685	0.988708	1.04062	0.982283	0.998461	1.09752	1.1243	1.04245	0.992289	0.994498	0.978674	0.956285	0.981985	0.985082	1.01562	1.0364	1.04383	1.01386	1.03453	0.994803	1.01865	1.00348	1.01345	1.0195	1.00173	1.0166	1.03589	0.992796	0.991144	1.02293	1.00622	1.01101	0.974197	1.06745	1.00161	1.02187		1.0186	0.0371855
130	1.08008	0.999138	1.06291	1.08648	1.05815	1.02042	0.997928	1.00439	0.922631	0.904079	0.96425	1.04825	0.98873	1.01796	1.02345	1.01314	1.02779	0.94498	1.00166	1.01886	1.03334	1.04542	1.02359	0.998325	1.00692	0.99673	0.967151	0.933851	1.01125	1.01654	1.01001	1.0168	1.03857	0.993974	0.989031	1.03129	1.01758	1.04292	1.01418	1.07405	0.991829	0.996763		1.01037	0.0388392
140	1.14532	0.998419	1.06445	0.993649	1.03645	0.954258	0.979282	0.950492	0.972921	0.885121	0.947778	1.01617	1.02681	1.0123	1.04475	1.00537	1.03176	0.928747	1.01043	1.00484	1.01799	1.03302	1.01146	1.03503	1.00427	0.9913	0.972064	0.93064	1.05203	1.04234	1.0115	1.0017	1.03665	1.00458	0.897102	0.997927	0.977131	1.05096	1.038	1.09158	0.984495	1.01717		1.00496	0.0481759
150	1.1505	0.999783	1.09696	1.06526	1.07999	1.01863	0.975138	0.888759	0.955513	0.932517	0.915467	1.06108	1.04289	1.05015	1.03203	0.995728	1.01864	0.942081	1.00971	1.01587	1.01593	1.02924	0.995424	1.00054	0.990273	0.940675	0.920567	0.93365	1.04306	1.00335	1.00033	1.0319	1.0378	0.989732	0.986918	1.04416	1.07805	1.06101	1.03395	1.04373	1.02556	1.04641		1.01188	0.0528825
160	1.09251	1.00148	1.10281	1.01562	1.04677	0.972954	0.991022	0.97205	0.934236	0.89223	0.976921	1.08406	1.16501	1.0293	1.02976	0.980284	1.02443	0.933965	1.00256	1.00877	1.01419	1.01126	1.02698	1.0463	0.99103	0.963447	0.992444	0.969567	1.03446	1.04313	1.00672	1.00974	1.003	1.03851	1.11213	1.05565	1.07277	1.07068	1.0146	1.0691	1.01688	1.04205		1.02051	0.0510169
170	1.07698	0.99912	1.0596	1.06974	1.07911	1.00275	0.98895	0.956372	0.972921	0.975174	1.02317	1.08758	1.17978	1.04562	1.04613	1.00606	0.979284	0.907296	0.99862	0.988421	1.00406	0.993617	1.01649	1.02684	1.00919	0.986745	0.965877	0.966156	1.01576	1.05002	1.00511	1.01425	1.02518	1.04087	1.06141	1.06013	1.10781	1.12118	1.03225	1.10767	1.02336	1.0542		1.02693	0.0508906
180	1.07801	0.999148	1.02755	0.949697	1.02375	0.97654	0.975829	0.97009	0.955513	0.923038	0.981356	1.04784	1.17157	1.01298	1.03963	0.987613	0.964336	0.878599	1.00738	1.0243	1.0039	1.02187	1.02903	1.05638	1.01599	1.00514	1.04631	1.05043	0.999466	1.06203	0.995626	1.02562	1.02518	1.02744	1.13062	1.06475	1.13527	1.13337	1.06203	1.08519	1.03351	1.07954		1.0258	0.0571332
190	1.10908	1.00055	1.071	1.06753	1.05512	0.999931	1	1.01321	1.02901	0.89223	1.09603	1.11139	1.15385	1.06149	0.999291	0.966169	0.970437	0.8986	1.03046	1.0526	1.01577	1.02997	1.05401	1.08814	1.00881	0.969754	0.999359	0.955321	1.01002	1.04391	1.00643	1.00994	0.999945	1.03474	1.11107	1.07633	1.11606	1.08551	1.0297	1.04847	1.03656	1.06739		1.03274	0.0548763
200	1.00035	0.999765	1.03756	1.07101	1.03654	0.999163	0.967541	0.997527	1.01547	0.934887	1.05865	1.11242	1.19783	1.07362	1.0202	0.950823	0.919185	0.896281	0.986278	0.992381	1.03572	1.07626	1.05463	1.05296	0.96493	1.0195	1.04612	0.991238	0.976463	1.03958	1.00841	1.02151	1.01333	1.03663	1.07092	1.06781	1.08265	1.11792	0.962288	1.04785	1.03424	1.04973		1.02472	0.0557111
210	1.0863	1.00193	1.09557	0.906756	1.03636	0.951185	0.959945	0.96715	1.05609	0.987023	1.05801	1.08013	1.07014	1.00107	1.01576	0.912312	0.944811	0.874831	0.97179	0.972153	1.04869	1.0959	1.05154	1.08626	0.921809	0.979388	0.969516	0.905558	1.00505	1.04332	1.01278	1.01425	1.01103	1.0437	1.06617	1.06494	1.12689	1.18839	0.981215	1.07446	1.05025	1.06062		1.01788	0.0660963
220	1.09872	1.00062	1.10767	1.12089	1.08086	0.981406	0.996547	1.00439	1.01741	0.950291	1.1144	1.10207	1.07309	1.03995	0.991106	0.914181	0.926201	0.897731	1.02509	1.03614	1.05914	1.11493	1.07426	1.05245	0.925213	0.974308	0.973156	0.876664	0.993933	1.04707	1.00466	0.998562	0.998416	1.00906	1.00752	1.05604	1.09023	1.13739	0.990147	1.00351	1.04988	1.07312		1.02353	0.0635894
230	1.14118	1.00134	1.13086	1.0861	1.07941	0.987296	1.02555	1.05534	1.0677	0.953845	1.10236	1.10497	1.21064	1.00583	0.99219	0.87872	0.906677	0.894832	0.98449	0.982675	1.06547	1.10551	1.04034	1.04682	0.918027	1.00339	0.964967	0.912982	0.99839	1.03998	1.00127	0.986207	0.969354	0.987376	1.0033	1.03971	1.0353	1.10912	0.964627	0.981436	1.06809	1.04354		1.02089	0.0706338
240	0.973421	0.99998	1.02362	1.03268	1.06259	1.02358	0.985497	0.96813	0.972921	0.900525	1.05738	1.13561	1.17026	1.03564	0.98726	0.906017	0.890508	0.938892	0.971611	0.929833	1.08795	1.12508	1.05637	1.04869	0.884362	1.00934	1.03339	0.939469	0.975285	1.06085	0.992286	1.01719	0.954824	0.992089	1.02866	1.05023	1.06493	1.1286	1.00376	1.01093	1.07237	1.06979		1.01363	0.066539
250	1.01588	1.00004	1.05266	1.10359	1.08723	0.99404	1.03039	0.920116	1.00387	0.83417	0.977555	1.07723	1.24642	1.03791	1.01122	0.882851	0.921625	0.908456	0.949431	0.934958	1.05977	1.12455	1.0536	1.04579	0.871879	1.00987	0.943131	0.858805	0.93845	1.03486	1.01636	0.996405	0.987709	1.00835	1.04398	1.05839	1.11201	1.09066	1.01545	0.972566	1.07237	1.04813		1.0084	0.0797774
260	1.02209	1.00007	1.00713	1.09778	1.07287	1.00258	0.970304	0.961271	1.04642	0.89223	0.985157	1.11201	1.26447	1.03564	0.995741	0.870752	0.902711	0.890774	0.955692	0.927581	1.01831	1.06764	1.06377	1.05125	0.894196	1.00339	0.966059	0.926828	0.983379	1.05534	1.02168	0.99464	0.976237	1.00976	1.04979	1.07294	1.13433	1.11088	1.07904	0.949051	1.09926	1.05684		1.01424	0.0774979
270	0.951674	0.99968	0.997887	1.13674	1.11742	1.02998	1.01036	0.964211	0.998066	0.947921	1.03774	1.13643	1.22377	0.989059	0.983808	0.87808	0.925896	0.897731	0.97018	0.920981	1.04664	1.0896	1.07107	1.06184	0.905544	0.945405	0.932577	0.855194	1.01314	1.04608	1.00317	1.01837	0.999945	1.02602	1.10051	1.0885	1.10646	1.12596	1.06351	1.00701	1.08056	1.07106		1.01847	0.078788
280	0.969279	0.99983	1.01784	1.14994	1.12734	1.04304	1.03177	0.999487	1.0793	0.89934	1.04471	1.12277	1.21753	1.01468	0.982723	0.843651	0.934438	0.882078	0.959448	0.892716	1.065	1.1282	1.06696	1.0644	0.913488	0.996905	0.944587	0.889907	1.02498	1.05337	1.01253	1.00915	0.95903	1.02697	1.07409	1.07723	1.14069	1.0595	0.965265	0.980198	1.04842	1.00742		1.01715	0.0803169
290	1.00242	0.999241	1.04095	1.17798	1.1356	1.02699	1.03039	1.00145	1.12186	0.936072	1.07195	1.12546	1.17453	0.995407	0.974834	0.805681	0.953048	0.890484	0.961773	0.895278	1.08652	1.13802	1.04671	1.06816	0.877175	0.957141	0.883628	0.837737	1.05126	1.04825	1.00222	1.0321	1.01295	1.01919	1.0667	1.08624	1.13866	1.07345	0.977174	1.03857	1.08068	1.02577		1.02071	0.0873903
300	1.03348	0.999148	1.09526	1.12531	1.18318	1.05081	1.09047	0.941673	1.03288	0.910004	1.01557	1.08385	1.23427	0.973191	0.988542	0.829634	0.971047	0.886426	1.00077	0.95736	1.08399	1.1211	1.07559	1.07243	0.860532	0.941726	0.898004	0.807638	1.0486	1.07759	0.999254	0.986403	1.01983	1.04134	1.10315	1.07959	1.12242	1.11679	1.04161	1.0231	1.08618	1.07599		1.02585	0.0906609
310	1.08215	0.999634	1.10921	1.10107	1.16267	1.0567	1.04144	0.945593	1.00967	0.913559	1.0257	1.12277	1.17518	0.978405	0.96083	0.858062	0.966776	0.865265	0.965887	0.919777	1.05249	1.10518	1.07837	1.10043	0.899492	0.959594	0.914563	0.86322	1.07657	1.05337	1.01088	1.01955	1.0336	1.02744	1.1116	1.08921	1.09523	1.13664	1.01907	1.06889	1.06797	1.05374		1.02613	0.0822267
320	1.10183	0.999138	1.11345	1.16346	1.20554	1.07941	0.993785	0.921096	1.07544	0.8946	1.05421	1.10538	1.24543	0.96741	0.97227	0.860177	0.98508	0.893383	0.9734	0.975065	1.07702	1.13603	1.07467	1.08045	0.90857	0.959068	0.899823	0.822286	1.05582	1.04963	1.01265	1.04288	1.01103	1.04252	1.203	1.09976	1.13974	1.18236	0.973559	1.17781	1.07201	1.02898		1.03879	0.0996195
330	1.10183	0.999456	1.11499	1.1692	1.22009	1.1005	0.997928	0.889739	1.04255	0.910004	1.05105	1.11698	1.19619	0.973644	0.96014	0.901836	1.01925	0.913094	0.986815	0.964621	1.05867	1.13503	1.09553	1.08438	0.883605	0.951361	0.920567	0.838941	1.06115	1.05908	1.00643	1.02131	0.999181	1.05077	1.23312	1.10982	1.16977	1.17746	1.07032	1.16027	1.09694	1.0894		1.04531	0.0980026
340	1.05005	1.00056	1.10073	1.15998	1.22786	1.10579	1.03453	0.912277	1.05609	0.888676	1.05105	1.106	1.15647	0.933293	0.94801	0.85516	1.00857	0.931936	0.958196	0.928396	1.07338	1.18398	1.09533	1.0837	0.893818	0.946806	0.928574	0.864424	1.07334	1.05711	1.01385	1.04327	1.02557	1.06443	1.23153	1.10424	1.18127	1.1399	1.10498	1.15656	1.10513	1.11038		1.04512	0.0990691
350	1.18467	1.0006	1.17485	1.08534	1.22154	1.09222	1.02555	0.87896	1.07544	0.879197	1.01557	1.08323	1.19619	0.889541	0.930456	0.874293	0.982945	0.904978	0.996116	0.960156	1.05202	1.09192	1.06953	1.09923	0.938074	0.934369	0.903826	0.859006	1.08456	1.03446	1.02506	1.04798	1.07489	1.05854	1.22308	1.11741	1.14704	1.18776	1.10626	1.08065	1.11405	1.15441		1.04419	0.102531
360	1.23645	0.998129	1.15035	1.15127	1.21332	1.0666	1.01312	0.847604	1.04836	0.883936	0.993393	1.09358	1.21917	0.907223	0.935485	0.878621	1.03328	0.907007	0.996116	0.97025	1.02638	1.07142	1.10519	1.09957	0.920296	0.964323	0.950774	0.867835	1.07744	1.05258	1.01051	1.03602	1.03015	1.06938	1.20353	1.12815	1.17153	1.19857	1.09095	1.10499	1.11735	1.13675		1.04707	0.103728
370	1.22817	0.995812	1.10066	1.17508	1.20603	1.08419	0.987569	0.951472	1.0677	0.8946	1.05548	1.11035	1.21326	0.946441	0.91231	0.87808	1.02382	0.926138	0.975725	0.93158	1.03049	1.05623	1.11115	1.10162	0.942613	0.934894	0.911287	0.859006	1.08133	1.04273	1.01472	1.06132	1.03551	1.07598	1.25689	1.13109	1.19317	1.22269	1.06947	1.12727	1.11857	1.12815		1.05168	0.104644
380	1.2147	0.996512	1.11183	1.15114	1.19544	1.07864	1.00414	0.958331	1.11992	0.919483	1.19486	1.09731	1.25889	0.960156	0.916649	0.865735	0.979894	0.867294	0.954797	0.9263	0.94756	1.02585	1.13387	1.1257	0.937696	0.95066	0.938582	0.908167	1.07134	1.06105	1.00977	1.03582	1.02786	1.08399	1.23629	1.11892	1.19128	1.26113	1.00567	1.13965	1.10708	1.11806		1.05257	0.109575
390	1.28305	0.99811	1.18109	1.16535	1.22378	1.08282	0.997928	0.892679	0.978723	0.882751	1.14418	1.11159	1.22278	0.944288	0.931442	0.84793	0.964946	0.881208	0.949789	0.908906	1.02337	1.06844	1.10961	1.11921	0.908192	0.965374	0.86252	0.898335	1.07165	1.05179	1.02432	1.05798	1.0703	1.09295	1.27538	1.11966	1.21157	1.28977	0.997377	1.1283	1.10207	1.14111		1.05197	0.122056
400	1.38246	0.995569	1.15774	1.15001	1.22074	1.07728	0.98895	0.925995	1.06963	0.908819	1.14861	1.11035	1.22606	0.96605	0.927695	0.807452	0.952438	0.820045	0.939594	0.930998	1.08241	1.12442	1.12143	1.11597	0.947152	0.999883	0.930757	0.96114	1.10536	1.07227	0.981071	1.08524	1.05233	1.09177	1.26376	1.15003	1.21414	1.21364	1.0112	1.15223	1.11271	1.08218		1.06137	0.121157
410	1.3835	0.997625	1.21082	1.14931	1.2287	1.09546	1.02624	0.926975	1.05609	0.879197	1.15305	1.12091	1.21687	0.965937	0.915269	0.825994	0.990877	0.897151	0.96553	0.947033	1.02575	1.06492	1.13181	1.11887	0.963039	1.02248	0.970426	1.00609	1.09265	1.07523	0.995048	1.06936	1.09019	1.08635	1.28542	1.13667	1.20819	1.27055	1.03098	1.17224	1.13018	1.14833		1.07255	0.118562
420	1.28926	0.994924	1.1656	1.09633	1.18134	1.07301	1.03867	0.96813	1.00774	0.925408	1.19169	1.10973	1.21261	0.978291	0.941797	0.857472	0.986606	0.885846	0.941561	0.899627	1.03366	1.09888	1.11619	1.14465	0.974387	1.01109	0.942949	0.980001	1.10321	1.08015	0.986473	1.06994	1.08675	1.09672	1.23999	1.15867	1.22118	1.27206	1.03374	1.14377	1.12089	1.1395		1.06668	0.107666
430	1.27166	0.996129	1.16653	1.0549	1.19693	1.08829	1.0076	0.994587	1.00967	0.949106	1.19739	1.13519	1.25003	0.992233	0.937852	0.859882	0.991182	0.890194	0.947464	0.874545	1.07718	1.15951	1.12112	1.13953	0.969091	1.01425	0.960054	0.987426	1.11386	1.08153	1.00383	1.05994	1.06533	1.08941	1.26218	1.14599	1.24404	1.25171	1.1052	1.11799	1.11405	1.17963		1.0732	0.10932
440	1.27684	0.999737	1.19626	1.16144	1.25409	1.104	1.02555	0.988708	1.10832	0.975174	1.19042	1.12588	1.17157	0.973758	0.942093	0.860276	1.00277	0.888165	0.939057	0.876409	1.00343	1.08429	1.11557	1.12519	0.94337	0.934894	0.900369	0.938466	1.12237	1.07779	1.02111	1.06955	1.02671	1.0675	1.19402	1.14493	1.19831	1.27344	1.11519	1.10272	1.14363	1.17309		1.06753	0.11162
450	1.2758	0.998653	1.19719	1.08635	1.20361	1.0789	1.05663	0.979889	1.08897	0.945551	1.17395	1.10745	1.18569	0.982825	0.944657	0.831995	0.998199	0.907586	0.926357	0.872061	1.03034	1.10697	1.13387	1.13697	0.968335	0.989198	0.926936	0.917196	1.10936	1.0705	1.01472	1.0519	1.03933	1.04652	1.12587	1.14848	1.22875	1.23173	1.0818	1.12314	1.14925	1.11909		1.06173	0.104868
460	1.25509	0.993242	1.14742	1.16965	1.24082	1.07378	1.02003	1.00047	1.10445	0.978728	1.27152	1.11118	1.2044	1.01241	0.984498	0.866424	0.995148	0.938892	0.953903	0.906305	1.04648	1.12654	1.11208	1.11819	0.966065	0.982191	0.924935	0.970571	1.12145	1.04569	1.02609	1.06269	1.07757	1.05501	1.1898	1.15177	1.21306	1.29354	1.04501	1.15573	1.14192	1.15257		1.07636	0.104782
470	1.39075	0.996307	1.18371	1.13605	1.19838	1.07326	1.01243	0.96715	1.03675	0.934887	1.15368	1.14968	1.14728	1.01751	0.97937	0.859685	1.03786	0.927008	0.967318	0.948314	1.04315	1.11798	1.13695	1.11375	0.965687	1.02721	0.997903	1.09237	1.11094	1.07404	1.02263	1.06994	1.0573	1.05901	1.18557	1.13754	1.19101	1.26427	1.08818	1.13573	1.14082	1.15727		1.07873	0.100382
480	1.34415	0.997438	1.21429	1.14034	1.30373	1.11731	1.04489	0.961271	1.01934	0.964509	1.12327	1.07992	1.1417	0.96673	0.944558	0.822847	1.05494	0.931936	0.976977	0.950527	1.08589	1.14147	1.11115	1.08421	0.922187	1.0442	0.923479	1.03598	1.10843	1.04175	1.02647	1.08249	1.06954	1.07952	1.28648	1.15657	1.20724	1.27557	1.09882	1.13428	1.14729	1.16839		1.07934	0.112207
490	1.42803	0.998381	1.22739	1.16156	1.28704	1.10459	1.02555	0.993607	1.01161	0.949106	1.2297	1.11449	1.18897	0.974664	0.956294	0.847832	1.06074	0.936284	0.964099	0.915739	1.07908	1.12203	1.11855	1.12228	0.9672	1.03369	1.01137	1.13491	1.11059	1.0768	1.023	1.07406	1.08101	1.0953	1.30022	1.14264	1.19656	1.27168	1.09052	1.13243	1.14473	1.14661		1.09169	0.115788
500	1.39075	0.994784	1.21506	1.14881	1.26872	1.09759	1.05663	0.990668	1.0735	0.902895	1.23034	1.13726	1.14958	0.96299	0.929766	0.8769	1.04671	0.92237	0.918487	0.878117	1.07133	1.07368	1.1241	1.09975	0.974387	1.06627	1.01428	1.11946	1.1091	1.07208	1.01678	1.08583	1.08292	1.10968	1.3578	1.14122	1.23809	1.2865	1.04671	1.1019	1.11576	1.20428		1.08819	0.120289
510	1.36175	0.994017	1.16822	1.02049	1.17699	1.04432	0.991022	1.01419	1.03868	0.939626	1.22274	1.12484	1.13087	0.947688	0.924539	0.88895	0.975928	0.907876	0.973579	0.944393	1.07259	1.11639	1.11105	1.06013	0.938074	1.07626	0.962784	1.06809	1.0759	1.0768	1.02078	1.06936	1.10854	1.09271	1.30814	1.16083	1.20941	1.29316	1.1237	1.19575	1.15695	1.18318		1.07789	0.111489
520	1.37832	0.995316	1.21267	1.0424	1.18406	1.07523	1.00414	1.03574	1.04449	0.933702	1.19676	1.13768	1.18831	0.970131	0.911817	0.846258	1.01223	0.911065	0.939236	0.901917	1.05044	1.06857	1.12595	1.07123	0.980817	1.05314	1.07833	1.14715	1.10229	1.08173	1.01591	1.10289	1.11887	1.09884	1.29018	1.16548	1.22199	1.24228	1.19069	1.2007	1.16844	1.18525		1.08768	0.113828
530	1.39178	0.994298	1.1968	1.01727	1.17989	1.03083	1.00138	1.02202	1.03675	0.995317	1.27532	1.11366	1.18306	0.934086	0.911521	0.851865	0.990267	0.908456	0.953545	0.936783	1.08003	1.07825	1.1463	1.08626	0.983465	1.05436	1.0423	1.1624	1.10521	1.09157	1.0296	1.11485	1.12231	1.08965	1.27697	1.16251	1.23308	1.25975	1.15283	1.16048	1.14375	1.18662		1.0878	0.114099
540	1.38868	0.995718	1.21783	0.92488	1.1711	1.0544	1.00069	1.00243	1.01354	0.989392	1.32854	1.11532	1.18076	0.929553	0.894756	0.840553	0.98325	0.9215	0.95283	0.934958	1.11169	1.08442	1.12791	1.04784	1.01902	1.03457	0.982618	1.0707	1.11171	1.07641	1.01822	1.10583	1.10969	1.05972	1.18029	1.193	1.23268	1.22432	1.18856	1.11531	1.16978	1.16965		1.07797	0.116964
550	1.46842	0.997793	1.26282	1.10252	1.24847	1.08428	0.979972	1.02006	1.09284	0.883936	1.19423	1.12546	1.15188	0.910284	0.894362	0.860571	0.964946	0.935124	0.937268	0.889882	1.1071	1.11832	1.13551	1.09975	1.00767	1.06557	0.966241	1.06468	1.12432	1.08941	1.0336	1.12544	1.11199	1.06938	1.20459	1.19616	1.22618	1.23877	1.21535	1.10953	1.16832	1.17195		1.08702	0.124476
560	1.53573	0.997157	1.28324	1.046	1.23476	1.02196	1.0297	1.04456	1.04642	0.939626	1.16825	1.09938	1.1394	0.886708	0.873455	0.873801	0.925286	0.869613	0.95909	0.912012	1.08731	1.1079	1.17395	1.10077	1.00276	1.06242	0.934579	0.975988	1.12918	1.08488	1.03009	1.10897	1.0856	1.04605	1.15757	1.17345	1.21928	1.23927	1.18728	1.1217	1.15964	1.17562		1.07739	0.130428
570	1.4622	0.998438	1.27361	1.15923	1.29596	1.07779	1.06492	0.993607	1.02321	0.930147	1.14988	1.09793	1.14039	0.914364	0.890713	0.812125	0.94115	0.889035	0.910975	0.8443	1.08399	1.08847	1.1536	1.05484	1.02659	1.08817	1.02047	1.06709	1.11427	1.08488	1.03372	1.09622	1.14219	1.0748	1.25425	1.17513	1.2393	1.25949	1.10009	1.06044	1.13801	1.1833		1.08117	0.129943
580	1.43424	0.997017	1.25458	1.15007	1.31502	1.08752	1.00898	0.96911	1.09478	0.879197	1.12264	1.06874	1.14827	0.93896	0.901265	0.84134	0.961285	0.885846	0.929398	0.918341	1.0794	1.10857	1.16069	1.0977	1.00692	1.08186	0.97261	0.998462	1.13441	1.10437	1.0204	1.09093	1.12154	1.04558	1.17659	1.1901	1.23985	1.22721	1.21301	1.04517	1.14302	1.14615		1.07884	0.124363
590	1.45185	0.995241	1.24472	1.11786	1.27012	1.06754	1.05939	0.952452	1.02708	0.905264	1.17522	1.06792	1.14761	0.914931	0.86951	0.808288	0.916744	0.833669	0.937805	0.935967	1.09918	1.09019	1.16532	1.13304	1.02923	1.07941	1.0312	1.06608	1.15941	1.09728	1.0235	1.11583	1.08522	1.06585	1.25531	1.19261	1.22984	1.19756	1.2262	1.07384	1.16538	1.09869		1.08046	0.129121
600	1.50777	0.996559	1.27584	1.16346	1.28484	1.06712	1.00829	0.96715	1.11219	0.908819	1.18282	1.08013	1.10723	0.856218	0.839728	0.756596	0.938404	0.839177	0.997189	0.985858	1.0813	1.08376	1.17241	1.08523	1.05874	1.0696	1.03339	1.11745	1.13758	1.12426	1.02102	1.0872	1.09707	1.10308	1.29863	1.20313	1.24445	1.24681	1.16155	1.15759	1.15536	1.17458		1.09023	0.140223
610	1.42492	0.995494	1.26722	1.16851	1.29266	1.07617	0.999309	0.977929	1.04062	0.913559	1.21513	1.05384	1.05701	0.862112	0.839531	0.767072	0.890813	0.827292	0.972327	0.944626	1.0813	1.08601	1.17477	1.08113	1.04512	1.08957	0.998085	1.09518	1.14235	1.09275	1.03529	1.08622	1.11581	1.06255	1.17553	1.2072	1.22104	1.15636	1.26278	0.901196	1.10721	1.00697		1.06692	0.135514
620	1.56162	0.996036	1.28894	1.17792	1.28352	1.07651	1.06837	1.03084	1.09478	0.898155	1.16318	1.05467	1.07014	0.84647	0.830063	0.754481	0.934743	0.838887	0.991644	0.971803	1.04315	1.07984	1.14538	1.05177	1.02999	1.04858	0.961328	0.93064	1.09378	1.11126	1.02102	1.08642	1.08904	1.09695	1.22572	1.198	1.21888	1.16779	1.21599	0.963696	1.13935	1.03678		1.06877	0.14352
630	1.45806	0.995064	1.26282	1.1771	1.28827	1.05909	1.04282	0.935794	1.04255	0.931332	1.21133	1.10787	1.15056	0.850324	0.838051	0.754481	0.891118	0.798305	1.06355	1.02317	1.04474	1.07885	1.12205	1.10197	1.00881	1.0915	1.01592	1.04441	1.10321	1.08881	1.03867	1.09269	1.10472	1.12994	1.33509	1.18048	1.19534	1.14568	1.22365	0.952145	1.13788	0.997221		1.07418	0.139641
640	1.39593	0.996391	1.26483	1.15708	1.28858	1.05525	1.01174	1.04652	1.03868	0.911189	1.22717	1.06833	1.08622	0.76248	0.79466	0.720839	0.903626	0.801204	1.07374	1.01595	1.05313	1.09344	1.05185	1.07687	1.01789	1.09956	1.01938	1.05926	1.11663	1.10477	1.02828	1.08622	1.10778	1.11958	1.29018	1.181	1.23525	1.16817	1.18792	0.957508	1.12859	1.00376		1.06684	0.140027
650	1.41042	0.99726	1.27885	1.16706	1.29807	1.06225	1.02141	0.975969	1.02708	0.945551	1.23731	1.03935	1.06095	0.783223	0.782135	0.718232	0.918575	0.819466	1.05872	1.01129	1.07449	1.12336	1.03489	1.08165	1.05798	1.08116	1.02847	1.1008	1.12544	1.09709	1.02511	1.10367	1.10701	1.07009	1.25055	1.15532	1.18384	1.18362	1.16134	0.955858	1.13654	1.04778		1.06665	0.136955
660	1.44667	0.995419	1.28709	1.15771	1.24214	1.00958	0.989641	0.97401	1.03868	0.870902	1.20626	1.05715	1.04322	0.760667	0.772767	0.699887	0.874339	0.794537	1.03421	0.961126	1.03223	1.13045	1.05524	1.08865	0.993678	1.05594	0.955869	0.986623	1.10956	1.06006	1.03962	1.10132	1.08751	1.0708	1.20723	1.12483	1.1741	1.21038	1.12497	1.01093	1.15304	1.08504		1.04938	0.143415
670	1.39075	0.994896	1.23524	1.14476	1.19381	0.985503	0.966851	1.01321	1.02515	0.938442	1.27532	1.07909	1.08885	0.803058	0.797815	0.72261	0.85878	0.782362	1.01186	0.931774	1.0039	1.11513	1.1056	1.08182	0.994434	1.08694	0.97079	0.999666	1.12298	1.06696	1.03005	1.10622	1.0944	1.09507	1.1713	1.13754	1.14123	1.1335	1.10668	1.04105	1.14033	1.03781		1.04818	0.13096
680	1.39386	0.995933	1.25343	1.08724	1.21169	1.03459	0.964779	1.02006	1.10638	0.886306	1.34374	1.07081	1.04749	0.822214	0.777895	0.6599	0.860306	0.76526	1.01991	0.961437	0.952466	1.07308	1.09533	1.07516	1.01297	1.07153	1.01574	1.05264	1.14266	1.07326	1.02568	1.09171	1.14143	1.03427	1.10896	1.1559	1.19128	1.13161	1.19494	0.92863	1.12639	0.988966		1.04685	0.143229
690	1.41042	0.995989	1.27461	1.16232	1.23955	1.00599	0.910221	1.03084	1.01934	0.913559	1.37479	1.08344	1.08721	0.78855	0.761327	0.707855	0.81485	0.761491	1.04835	0.972192	1.03651	1.115	1.10283	1.0714	1.01902	1.09675	1.00391	1.02174	1.10915	1.04588	1.02816	1.08955	1.07719	1.07999	1.11953	1.16087	1.20386	1.21402	1.15177	1.09241	1.13825	1.11325		1.05843	0.148499
700	1.45288	0.993802	1.26221	1.14236	1.23476	0.990967	0.959945	1.03476	1.0058	0.872087	1.36845	1.0822	1.08327	0.852477	0.815172	0.712724	0.819426	0.760622	1.04781	1.00135	0.983487	1.09198	1.09502	1.08592	1.01524	1.06873	0.924025	0.937663	1.06853	1.06577	1.03463	1.10681	1.12422	1.07645	1.12745	1.16703	1.19074	1.18299	1.18664	1.00041	1.14265	1.03769		1.05255	0.146998
710	1.49327	0.995232	1.29688	1.13397	1.24913	1.0135	0.948204	1.02986	1.04642	0.90171	1.31713	1.09379	1.05471	0.829241	0.790814	0.68823	0.845967	0.782072	1.0106	0.951304	1.04474	1.13019	1.11927	1.10914	1.01108	1.08099	0.949136	1.01913	1.07944	1.07897	1.03009	1.07092	1.14143	1.0543	1.0836	1.15761	1.18898	1.15485	1.17346	1.04394	1.14595	1.06762		1.05731	0.147407
720	1.49016	0.994344	1.29896	1.13769	1.23177	0.992077	0.924724	1.0279	1.07544	0.83654	1.32093	1.09131	1.07539	0.856784	0.804226	0.655867	0.875254	0.774825	1.03511	1.00119	1.08589	1.16747	1.11927	1.13799	1.03869	1.10166	1.0201	1.07672	1.07713	1.09354	1.02915	1.09544	1.09287	1.08164	1.13379	1.14251	1.19466	1.185	1.23875	0.99505	1.15108	1.04079		1.06666	0.151014
730	1.67035	0.995531	1.32415	1.13529	1.26072	1.02315	1.0145	1.04064	1.10638	0.872087	1.3165	1.09234	1.05931	0.79263	0.745252	0.619471	0.845967	0.751926	1.02813	1.00197	1.02812	1.129	1.1203	1.14346	1.0281	1.07135	0.984801	0.984416	1.10884	1.0961	1.03846	1.11936	1.13187	1.07504	1.16338	1.1507	1.17667	1.16653	1.27703	0.979373	1.11576	1.00066		1.06632	0.17493
740	1.55954	0.993989	1.30835	1.12929	1.23067	0.986016	0.959254	1.04848	1.08704	0.882751	1.35641	1.05177	1.02024	0.72825	0.690026	0.660195	0.827968	0.738592	0.981091	0.915895	1.0881	1.13112	1.16594	1.13628	1.03982	1.04928	0.968425	0.997458	1.14732	1.09945	1.03797	1.11328	1.1311	1.0715	1.1116	1.13186	1.16422	1.13412	1.29085	0.972566	1.11588	0.985985		1.05333	0.172719
750	1.65274	0.993157	1.28678	1.13902	1.22588	1.00113	0.973757	1.04162	1.01161	0.886306	1.3165	1.04701	0.987417	0.768601	0.715864	0.651195	0.773665	0.714822	0.99397	0.931735	1.01815	1.10664	1.12452	1.14482	1.01599	1.04438	0.91802	0.871045	1.14506	1.11776	1.04556	1.11034	1.13531	1.06561	1.08941	1.16129	1.17572	1.21013	1.24045	0.996906	1.12786	1.08195		1.04904	0.179728
760	1.53366	0.992073	1.29734	1.149	1.21279	0.984479	0.957182	0.963231	1.0619	0.936072	1.29686	1.02941	1.00514	0.698893	0.701762	0.615241	0.760852	0.684965	0.950862	0.873885	1.10393	1.17052	1.15545	1.13048	1.00994	1.04788	0.987713	0.970771	1.1526	1.08921	1.0472	1.10662	1.11428	1.07032	1.09945	1.15509	1.18343	1.25673	1.13327	1.07096	1.13703	1.13205		1.04835	0.177047
770	1.59579	0.992896	1.32946	1.10138	1.20383	0.990028	0.950276	1.05338	1.00774	0.89697	1.31397	1.03935	0.98479	0.708527	0.678784	0.595224	0.744988	0.662645	0.949431	0.8919	1.07782	1.13357	1.15175	1.12467	1.02507	1.05997	0.971154	0.951308	1.13846	1.10693	1.03521	1.1076	1.12652	1.08376	1.14013	1.19429	1.20535	1.22821	1.16602	1.05693	1.14143	1.09215		1.04785	0.186627
780	1.6921	0.993802	1.34741	1.13826	1.2515	1.0153	1.00069	0.999487	1.0735	0.89697	1.3146	1.01203	0.94146	0.628505	0.634012	0.553565	0.686109	0.669022	0.93226	0.861228	1.08019	1.16733	1.16388	1.14397	1.0402	1.06575	1.02902	1.03639	1.12211	1.10201	1.03018	1.09348	1.09592	1.07457	1.12957	1.19407	1.23403	1.21666	1.17325	1.09427	1.16282	1.13549		1.05302	0.207527
790	1.59061	0.992821	1.32838	1.12216	1.24073	1.01205	0.947514	1.04848	1.04062	0.861423	1.29433	1.01575	0.970019	0.627598	0.614288	0.597338	0.745293	0.729026	0.956407	0.90083	1.09665	1.15281	1.16655	1.1257	1.0281	1.08467	0.970972	0.991037	1.14594	1.10221	1.03104	1.10563	1.1334	1.10779	1.26376	1.19868	1.23971	1.31288	1.0565	1.24175	1.15389	1.24544		1.06169	0.200708
800	1.56472	0.992924	1.33154	1.11502	1.20519	0.992418	0.984807	0.958331	0.94971	0.898155	1.31587	1.05136	1.0163	0.666476	0.659455	0.610028	0.739802	0.655399	0.959627	0.894851	1.10757	1.15738	1.19924	1.14499	1.02545	1.04315	0.906556	0.962745	1.12775	1.10083	1.03962	1.10328	1.12078	1.1455	1.28806	1.2323	1.25811	1.31427	1.07266	1.22772	1.14937	1.21184		1.05955	0.200129
810	1.64342	0.994279	1.35042	1.06974	1.28853	1.02187	1.01243	1.04946	1.05803	0.872087	1.18092	1.02362	1.01138	0.708301	0.726712	0.598224	0.823697	0.717721	0.993075	0.930881	1.11643	1.16097	1.1978	1.13543	1.0576	1.10691	1.00245	0.985218	1.13528	1.10477	1.04044	1.13466	1.13569	1.14055	1.35252	1.2324	1.26961	1.34844	1.07011	1.26279	1.16318	1.20015		1.08162	0.194453
820	1.7097	0.992298	1.3508	1.11559	1.25093	1.00693	0.928867	1.0279	1.04449	0.902895	1.26075	1.02238	1.00186	0.724963	0.699987	0.553712	0.758716	0.685835	0.973579	0.915235	1.10187	1.14664	1.21589	1.16429	1.03907	1.05839	0.99117	0.962544	1.15956	1.09	1.02861	1.13309	1.13302	1.08988	1.20195	1.23975	1.26528	1.29454	1.22088	1.14109	1.17308	1.20267		1.07097	0.203139
830	1.69831	0.992204	1.35527	1.11098	1.26516	1.03066	1.01796	0.97499	0.951644	0.876827	1.15495	0.937299	0.934894	0.638366	0.675431	0.585141	0.809358	0.746418	0.957123	0.917215	1.11976	1.14246	1.23398	1.16821	1.07841	1.0971	1.00172	0.995251	1.15075	1.11698	1.02486	1.1425	1.17126	1.0649	1.16127	1.26508	1.26623	1.25271	1.20897	1.17059	1.18751	1.18158		1.06743	0.201867
840	1.76458	0.993457	1.36159	1.10353	1.16776	0.967149	0.993785	1.00439	1.00774	0.854314	1.26075	1.0201	0.976584	0.6429	0.659554	0.538219	0.726684	0.67395	0.97966	0.932551	1.11406	1.13556	1.24395	1.17931	1.07765	1.08852	1.02502	1.04762	1.17785	1.11442	1.01863	1.12211	1.13225	1.08211	1.16549	1.2473	1.23498	1.24844	1.12327	1.19204	1.15695	1.20221		1.06569	0.212655
850	1.62375	0.994008	1.3525	1.1017	1.1885	0.985247	0.999309	0.97009	1.02321	0.893415	1.2202	1.02486	0.97921	0.596541	0.621487	0.588682	0.73126	0.685545	1.02921	0.982131	1.13875	1.1745	1.21589	1.16616	1.05533	1.04543	0.938036	0.952712	1.1903	1.10299	1.03137	1.11426	1.13187	1.08753	1.20617	1.24898	1.23241	1.3007	1.11221	1.28259	1.17076	1.20577		1.06418	0.205426
860	1.58233	0.996933	1.37045	1.1113	1.16245	0.97671	1.03315	0.916196	1.0058	0.819951	1.11503	0.969177	0.950979	0.573305	0.599101	0.542007	0.695871	0.69714	0.956228	0.911197	1.11723	1.15181	1.21445	1.16104	1.07841	1.11094	1.03175	0.999264	1.16592	1.1028	1.01863	1.13564	1.12728	1.07881	1.20142	1.25385	1.24959	1.3257	1.07521	1.29785	1.16636	1.18215		1.05313	0.211665
870	1.49845	0.996064	1.3307	1.10277	1.16943	0.965527	0.96616	0.940693	1.03868	0.855499	1.19549	1.03417	1.04618	0.599828	0.628391	0.537039	0.734616	0.713663	0.953724	0.931541	1.14413	1.1611	1.2015	1.16907	1.06782	1.0964	1.05322	1.04361	1.16048	1.11343	1.02403	1.14133	1.15711	1.11015	1.3652	1.25534	1.21455	1.31402	1.08691	1.27682	1.17052	1.17906		1.06534	0.202326
880	1.49638	0.995176	1.33362	1.09791	1.14035	0.960063	1.02003	0.864262	1.01741	0.815212	1.08906	1.02734	0.989714	0.595861	0.615669	0.606339	0.802952	0.739171	0.964993	0.929367	1.11548	1.17377	1.21301	1.12638	1.07689	1.08519	1.00227	1.03297	1.19896	1.0959	1.03071	1.13897	1.14372	1.13701	1.33561	1.28499	1.25703	1.32331	1.12263	1.24113	1.13874	1.217		1.06173	0.197625
890	1.75734	0.993232	1.4434	1.18682	1.08073	0.950502	1.02417	1.01223	1.06576	0.878012	1.15938	1.26829	1.56188	0.954375	0.979272	0.801796	0.94115	0.880049	1.59264	1.01408	2.17589	1.65525	1.15257	1.11699	1.01221	1.10989	0.981708	1.06087	1.13589	1.09925	1.03504	1.10328	1.08178	1.10756	1.28384	1.22775	1.20724	1.31829	1.33529	1.15202	1.10598	1.17688		1.17097	0.261751
900	2.29789	0.991064	1.69232	1.18878	1.19175	1.02435	1.12293	1.12687	1.09091	0.857868	1.21957	1.26995	1.54317	0.886141	0.925919	0.710117	0.923456	0.868744	1.55096	0.984771	2.83192	1.84197	1.20694	1.02103	1.00276	1.11182	1.00482	1.09197	1.12667	1.08448	1.0089	1.10328	1.09898	1.04417	1.25108	1.23827	1.18655	1.27507	1.11158	1.25186	1.10207	1.13148		1.20465	0.379078
910	2.53297	0.990887	1.86219	1.21309	1.28462	1.04407	1.07113	1.02692	1.00774	0.920668	1.11693	1.2035	1.41711	0.865512	0.971678	0.768154	0.933828	0.87773	1.24582	1.01878	2.88446	1.78612	1.2015	0.984495	0.972117	1.09763	0.985893	1.05164	1.12432	1.08842	1.00486	1.09877	1.06533	1.092	1.26112	1.21262	1.1718	1.29002	0.964202	1.11139	1.07311	1.15303		1.19162	0.401582
920	2.27511	0.986877	1.83969	1.18613	1.23102	1.01683	1.06008	0.994587	1.00774	0.863793	1.09983	1.20681	1.37247	0.913797	0.975228	0.843258	0.920405	0.869033	1.1401	1.10626	2.1656	1.51696	1.21301	1.00362	0.996704	1.09658	1.02847	1.10962	1.12027	1.07798	0.986679	1.12466	1.03092	1.07292	1.26112	1.21391	1.186	1.29203	0.904445	1.13201	1.06919	1.13675		1.1583	0.299902
930	1.98101	0.99326	1.70557	1.216	1.14004	0.946148	1.0221	0.992628	0.940039	0.835355	1.14861	1.25567	1.3751	1.014	0.991993	0.902721	0.98447	0.889614	1.14046	1.15102	3.68736	1.80237	1.18043	0.976982	0.965309	1.08607	0.997357	1.08514	1.09199	1.07129	1.00717	1.08799	1.03015	1.05501	1.2532	1.18752	1.17099	1.25761	0.903594	1.05961	1.05159	1.12334		1.18471	0.457621
940	1.93752	0.990027	1.81365	1.24789	1.1747	0.962283	0.934392	1.04162	0.943907	0.829431	1.16888	1.19232	1.38035	0.995974	0.992782	0.936953	0.987521	0.903528	1.12544	1.18892	3.81192	1.8301	1.14291	0.948981	0.971739	1.09325	0.98462	1.08856	1.08932	1.05416	1.0009	1.08308	1.01142	1.07127	1.2458	1.17697	1.16761	1.21226	0.871695	1.12974	1.06858	1.04503		1.18686	0.47744
950	1.96445	0.986064	1.90864	1.25313	1.28954	1.02358	0.94268	1.01712	0.928433	0.747673	1.1239	1.17845	1.35343	1.02374	0.980554	0.923723	0.953353	0.861497	1.06552	1.17793	3.33616	1.69651	1.1425	0.957006	0.937696	1.06417	0.940584	1.07792	1.0841	1.02915	0.997687	1.08818	0.993062	1.04605	1.27433	1.18161	1.16449	1.21741	0.862125	1.13469	1.05233	1.06452		1.16776	0.420745
960	1.92924	0.984167	1.96511	1.26961	1.28809	1.00847	0.970994	0.995567	0.926499	0.786774	1.14861	1.21261	1.28843	1.05106	0.98006	0.950823	0.984165	0.87657	1.0657	1.15149	2.67919	1.45083	1.12955	1.00567	0.932779	1.05033	0.904736	1.0719	1.09414	1.02678	1.00437	1.0721	1.01103	1.08399	1.3652	1.16867	1.1465	1.29128	0.815553	1.16894	1.07249	1.06624		1.15348	0.336236
970	2.35589	0.982037	2.14076	1.2374	1.30193	1.02136	0.961326	0.923055	0.945841	0.760706	1.07955	1.1917	1.25594	1.06375	0.9844	0.970644	0.986606	0.863816	1.0927	1.18465	2.26136	1.38337	1.14353	1.00686	0.937318	1.05033	0.914017	1.02294	1.08845	1.03387	0.996492	1.07759	1.03742	1.06349	1.37841	1.1659	1.16355	1.30824	0.811937	1.20875	1.06944	1.02669		1.15367	0.338918
980	2.37867	0.978626	1.87005	1.20716	1.28352	0.985503	0.930249	0.949512	1.03675	0.78085	1.09793	1.19667	1.27268	1.05435	0.98864	0.966808	0.964946	0.852221	1.06516	1.16484	1.89654	1.31001	1.14271	1.0323	0.911596	1.06505	0.916564	1.03197	1.06397	1.02718	0.989153	1.07681	1.00339	1.06184	1.24052	1.1527	1.15814	1.22118	0.826186	1.14934	1.07176	1.055		1.12926	0.291748
990	1.87953	0.984644	1.65126	1.20602	1.30962	1.01786	0.88674	0.925995	0.874275	0.816397	1.14418	1.1915	1.28515	1.05888	0.961718	0.999269	0.972878	0.838887	1.03404	1.13017	1.69064	1.31014	1.08412	0.988764	0.885497	1.05208	0.867615	1.00328	1.03651	0.985033	1.00243	1.10132	1.00951	1.06467	1.3446	1.15035	1.16679	1.28299	0.842135	1.13985	1.06418	1.1043		1.10347	0.225334
1000	2.09596	0.977261	1.56389	1.20248	1.32012	1.01308	0.845994	0.989688	0.943907	0.779665	1.22844	1.19046	1.24904	1.07826	0.955603	1.00237	1.01101	0.844974	1.03887	1.13002	1.39515	1.21967	1.1241	1.01198	0.90214	1.05016	0.885266	1.02575	1.02313	1.04411	0.973732	1.10995	0.970501	1.0411	1.30708	1.15819	1.16855	1.26326	0.873822	1.04724	1.05526	1.10419		1.10037	0.222493
1010	1.87125	0.981037	1.59255	1.23077	1.36994	1.0334	0.857735	0.987728	0.938104	0.800993	1.15051	1.18425	1.23197	1.04698	0.970692	1.00129	1.02108	0.864396	0.972327	1.06417	1.42332	1.26378	1.12513	1.01284	0.90214	1.06312	0.912743	1.0398	1.01883	1.01044	1.00358	1.09583	0.96706	1.06349	1.38581	1.14399	1.1438	1.27344	0.823846	1.16337	1.05795	1.04136		1.09778	0.205484
1020	2.11149	0.979457	1.59432	1.26677	1.39981	1.0141	0.868785	0.923055	0.967118	0.804548	1.13531	1.20681	1.30813	1.04086	0.955505	1.0002	1.01955	0.836568	0.986099	1.06134	1.40417	1.30331	1.12267	1.00191	0.930509	1.10061	0.990806	1.07913	1.07519	1.02343	0.997151	1.11093	0.985032	1.07339	1.3969	1.14112	1.15151	1.28964	0.802155	1.19472	1.07751	1.03035		1.11338	0.232568
1030	2.88609	0.975794	1.57106	1.22534	1.41348	1.02605	0.861878	1.00341	0.957447	0.766631	1.18092	1.17287	1.31371	1.06171	0.959055	0.99681	1.00583	0.871642	0.953009	1.00345	1.33184	1.25549	1.11927	0.998496	0.935048	1.08169	0.957325	1.08655	1.08026	1.02009	1.00964	1.09269	1.00645	1.08093	1.56438	1.14744	1.15354	1.28575	0.837244	1.18812	1.07274	1.03781		1.13212	0.326847
1040	1.88781	0.977766	1.64871	1.17072	1.41804	1.02008	0.800414	1.0328	0.897485	0.771371	1.26518	1.15589	1.29598	1.16792	0.958562	0.973349	0.979284	0.87715	0.97179	1.08036	1.3703	1.29966	1.11855	0.9903	0.918405	1.07871	0.914926	1.10762	1.10213	0.969082	1.01896	1.09328	0.995357	1.10143	1.6859	1.13951	1.16761	1.30384	0.807046	1.18502	1.02972	1.06567		1.11461	0.231219
1050	2.82085	0.976317	1.99924	1.24726	1.397	1.00326	0.847376	1.01125	0.883946	0.785589	1.22717	1.17369	1.27662	1.10014	0.952842	1.00079	0.994538	0.895702	0.988067	1.05411	1.37315	1.26709	1.13397	1.01011	0.936183	1.08432	0.928574	1.11504	1.10608	1.01044	1.00635	1.11152	1.00262	1.08988	1.65208	1.13321	1.17356	1.30786	0.794074	1.21328	1.05172	1.03723		1.147	0.343687
1060	3.07249	0.975859	2.1131	1.24852	1.46694	1.03408	0.881906	0.940693	0.907157	0.734639	1.15114	1.171	1.25988	1.02431	0.893573	0.980579	0.989046	0.863816	0.984132	1.11033	1.31016	1.2726	1.13284	1.01198	0.931266	1.09518	0.962056	1.09839	1.08943	1.02009	0.99744	1.08406	0.990768	1.092	1.62461	1.12931	1.16017	1.311	0.802793	1.18606	1.04732	1.02623		1.14712	0.382837
1070	3.68139	0.975925	1.95001	1.22016	1.42705	1.00557	0.811464	1.02104	0.918762	0.800993	1.2164	1.18446	1.2776	1.05174	0.932921	0.999368	0.988131	0.87686	0.996653	1.12012	1.24669	1.18936	1.13335	0.983471	0.92597	1.10376	0.977705	1.16581	1.08338	1.01201	1.00284	1.1025	0.964766	1.10709	1.66582	1.13593	1.14326	1.32206	0.821507	1.14934	1.06748	1.05787		1.16235	0.450781
1080	2.48844	0.979065	2.21202	1.24151	1.48333	1.00317	0.808702	0.963231	0.87234	0.769001	1.20943	1.15838	1.28417	1.05469	0.945347	0.99381	0.980504	0.89889	1.00524	1.10307	1.25587	1.20335	1.12842	1.00823	0.91084	1.10849	1.02902	1.16862	1.06064	1.03486	1.00503	1.05916	0.971266	1.07716	1.62884	1.13473	1.13067	1.30196	0.834692	1.16151	1.06614	1.03769		1.13742	0.321464
1090	3.0787	0.981411	2.30647	1.24883	1.51434	1.02383	0.848066	0.949512	0.920696	0.774925	1.15748	1.13995	1.32881	1.05072	0.944262	0.976202	1.01955	0.880628	1.01436	1.09841	1.20222	1.14863	1.1387	0.985178	0.934292	1.12793	1.00172	1.16741	1.10726	1.03367	1.00144	1.09603	1.01754	1.11368	1.73028	1.1539	1.16463	1.30472	0.859999	1.12541	1.08643	1.04916		1.16208	0.395282
1100	4.04591	0.976355	2.03583	1.23646	1.53178	1.02247	0.771409	1.00145	0.953578	0.757152	1.18599	1.13995	1.2904	1.04301	0.952941	0.984908	1.01711	0.886136	0.990392	1.07232	1.19826	1.18969	1.1537	1.00174	0.935426	1.11357	1.02902	1.20112	1.09957	1.02659	0.978433	1.06073	1.00951	1.07645	1.70756	1.15073	1.15841	1.28562	1.07351	1.09158	1.07702	1.12207		1.18181	0.504116
1110	3.57784	0.977289	2.04284	1.20602	1.54334	1.01658	0.801105	1.02398	0.928433	0.786774	1.20753	1.18508	1.33636	1.07056	0.955406	0.985203	1.03176	0.880628	1.03368	1.09243	1.18797	1.16521	1.12729	0.983471	0.924079	1.07941	0.936944	1.15557	1.08497	1.01418	1.00791	1.05837	0.96706	1.08352	1.77466	1.15496	1.15097	1.285	1.10732	1.14975	1.06528	1.06246		1.17165	0.443259
1120	4.58543	0.974514	2.0108	1.07031	1.48078	0.999077	0.796961	0.977929	0.901354	0.77611	1.26582	1.17266	1.31076	1.07373	0.947911	0.999122	1.01772	0.893093	1.03153	1.10606	1.19367	1.16176	1.16779	1.00669	0.924835	1.14125	1.011	1.18186	1.10106	1.02442	0.994636	1.10014	1.00798	1.06679	1.78205	1.1497	1.1346	1.25347	1.19558	1.1021	1.09682	1.0816		1.19694	0.579585
1130	3.71971	0.978168	2.18267	1.20128	1.54409	1.02349	0.826657	0.990668	0.887814	0.750042	1.19106	1.15568	1.30682	1.06523	0.967635	0.991351	1.01406	0.882657	1.06534	1.1506	1.21519	1.14737	1.12863	1.03042	0.952448	1.12583	1.01883	1.18306	1.10772	1.01241	0.993935	1.0923	0.988091	1.08352	1.93844	1.17242	1.14637	1.26314	1.17346	1.13944	1.07078	1.04732		1.18872	0.472833
MAX	4.58543	1.00233	2.30647	1.26961	1.54409	1.11731	1.12293	1.12687	1.12186	1.13277	1.37479	1.26995	1.56188	1.16792	1.04613	1.03026	1.06592	1.12818	1.59264	1.18892	3.81192	1.84197	1.24395	1.17931	1.07841	1.14125	1.07833	1.20112	1.19896	1.12426	1.0472	1.1425	1.17126	1.1455	1.93844	1.28499	1.26961	1.34844	1.33529	1.29785	1.18751	1.24544		1.40642	0.687866

## Sheet: Endogenous_-TG
	cell1	cell2	cell3	cell4	cell5	cell6	cell7	cell8	cell9	cell10	cell11	cell12	cell13	cell14	cell15	cell16	cell17	cell18	cell19	cell20	cell21	cell22	cell23	cell24	cell25	cell26	cell27	cell28	cell29	cell30	cell31	cell32	cell33	cell34	cell35	cell36	cell37	cell38	cell39	cell40	cell41	cell42	cell43		Average	Std. Err.
Time [s]	1.03443	1.02679	0.987007	0.989299	0.858329	0.81941	1.01976	1.03364	0.959402	0.967536	0.945518	0.966665	0.979002	0.966116	0.930586	1.08717	1.13683	0.96139	0.989578	0.983779	1.01739	1.04837	1.01039	0.999708	0.991719	1.00827	0.986385	1.03399	1.08265	1.00066	0.941801	1.01486	1.01722	1.01653	1.04195	1.01832	0.962452	0.986072	1.09301	1.04586	1.01038	1.01865	1.00271		0.999805	0.0551876
0	1.01424	1.05318	1.02982	1.00781	0.945172	0.887744	0.992211	0.999478	1.0275	0.947921	0.943728	0.94451	0.978369	0.951013	0.900929	0.982655	1.16785	0.987708	1.02141	1.02554	1.03293	1.05177	0.990404	0.981224	1.00461	0.998236	0.985749	1.01786	1.08386	1.01732	0.979249	1.02897	1.02593	1.00893	1.00334	1.02137	0.98736	0.915638	1.13301	1.09021	1.0799	1.02749	1.06673		1.00793	0.0552819
10	0.989826	1.03534	0.992777	1.01543	0.944856	0.908036	0.994891	0.999618	1.0664	0.992589	1.01944	0.980358	0.959794	0.969001	0.933216	0.926798	1.11294	1.02069	1.01092	1.00981	1.02714	1.04014	1.00436	0.984519	1.02982	0.965328	0.971211	0.990176	1.06673	1.0045	1.00757	1.02744	1.00929	1.00151	0.937638	1.0052	0.978809	0.896493	1.0399	1.09131	1.10461	1.12535	1.02615		1.00507	0.0503391
20	0.990765	1.0201	1.02665	0.998506	0.917698	0.898188	1.01084	1.01452	1.04634	1.02679	1.0345	1.03851	0.989134	0.979013	0.974113	0.941687	1.03204	1.01897	0.988312	1.01882	1.00334	1.04978	1.00287	0.989368	1.03276	0.970783	0.990051	1.00131	1.0415	0.930991	0.850581	0.995323	1.01057	0.999562	0.940648	1.02668	1.00527	0.929277	1.03925	1.00188	0.967649	1.22636	1.05591		1.00063	0.0557414
30	0.994991	1.05355	1.02479	1.04078	0.967909	0.943545	1.01435	1.01747	1.04617	0.975422	0.992273	1.00097	1.00412	0.98648	0.976983	1.04279	0.941913	0.964	1.02756	1.03899	1.02775	1.05283	0.992085	0.984974	1.0132	1.00246	1.01574	1.00711	1.08025	0.986758	0.897631	0.984619	1.00391	0.999562	0.922063	1.00745	0.999355	0.973202	0.929749	1.05051	1.03079	1.07232	0.993688		1.00193	0.0391192
40	1.00485	1.03868	1.03037	1.04127	0.982752	0.995467	1.01716	1.02562	0.999949	0.964544	0.946571	1.00928	1.04486	1.00684	1.00066	1.00835	1.00814	1.01691	1.02449	1.02302	0.969847	1.03849	0.993547	0.985466	1.02473	0.987061	1.01615	1.00165	1.0765	1.03697	0.850421	0.986828	0.997001	1.02272	0.950072	0.995406	0.986901	1.01354	0.876639	1.03863	1.00863	0.995611	1		1.00099	0.0398904
50	0.994991	1.06247	0.992032	1.04721	1.00328	0.995467	1.01787	1.02141	0.971492	1.03019	1.04429	1.03621	1.01911	0.979183	0.966221	0.946942	1.08653	1.00598	1.0055	1.01663	0.981919	0.998881	0.993913	0.991034	1.02462	0.996388	1.00892	0.996957	1.06313	1.00414	0.9378	0.999571	1.01313	1.01688	0.910807	1.01385	0.998437	1.03685	0.92057	0.99171	0.976896	1.10199	1		1.00515	0.0377252
60	0.9748	1.01341	1.01548	1.03979	0.999489	0.984128	0.997615	1.01396	0.977578	1.00863	0.999117	0.901277	1.01088	0.982577	0.955937	0.912104	1.0639	1.01858	0.988493	0.995841	0.975246	1.03755	1.00784	1.00323	1.00721	0.997708	1.00685	1.0053	1.02693	0.982404	0.975728	1.00671	0.99649	0.991608	0.957401	1.01508	1.00354	1.02238	0.8432	0.917837	0.886971	0.967516	0.963931		0.987262	0.0420053
70	0.977148	1.03274	1.00636	1.00544	1.01465	0.98741	1.02046	1.01213	0.989751	0.971173	0.952573	0.944356	1.02417	1.00549	0.984397	0.965236	1.09575	1.0188	0.988493	1.006	0.994738	1.0218	1.01314	1.01425	1.00303	1.01187	1.00711	1.00348	1.0433	0.94649	0.987411	1.01809	1.01415	1.01264	0.910414	1.01492	1.01342	1.04344	0.865493	0.944054	0.909771	0.947945	0.930568		0.99242	0.0414199
80	0.982313	1.01416	1.01213	1.01237	0.99191	1.03366	0.967082	0.969114	1.04231	1.02767	1.05156	1.02282	1.03621	0.963231	0.991572	0.928647	1.00311	1.01419	1.03046	1.01629	1.00532	1.03591	1.01131	1.01024	1.01456	0.997532	0.994379	0.994008	1.03519	1.02603	1.04614	1.01826	0.999305	0.986836	0.88306	1.0141	1.02432	1.03941	0.894342	1.00347	1.00878	0.94321	0.999098		1.00222	0.0364122
90	0.977148	1.02345	0.993893	1.03296	0.972962	0.925044	0.948279	0.948169	1.08458	1.00914	1.01733	0.978204	0.93573	1.02076	1.01166	0.974092	1.04503	1.02585	1.01056	1.00581	1.00523	0.995119	0.984813	0.99664	0.998164	0.996564	1.00558	1.00033	1.0047	1.00977	1.03798	1.00994	0.97678	0.971988	0.862381	1.01082	1.01089	0.988441	0.895654	0.943442	0.921411	0.746235	1.02615		0.984644	0.0551975
100	0.989826	1.03645	1.0019	1.03187	0.989699	0.919375	1.0158	1.00341	1.02281	0.930856	0.903607	0.998974	1.00602	1.01143	0.991572	0.970589	1.06683	1.01269	0.979449	0.973004	1.00009	1.02086	1.00316	1.0152	1.00823	1.00316	0.992317	0.996516	1.03489	1.02435	0.993332	0.992265	0.999561	0.980826	0.918529	1.03422	1.0152	1.04741	1.09105	0.970516	0.968605	0.773066	0.99459		0.993817	0.0498134
110	0.981844	0.955812	0.993149	0.999298	0.996962	1.02501	1.00605	0.993152	1.02906	0.984533	0.992905	1.05128	0.932353	1.02483	1.01812	0.92096	1.00311	1.00314	0.999345	1.00933	0.99904	1.02568	0.996398	1.00403	0.993641	0.996652	0.994456	1.00512	0.973007	0.98572	1.01894	0.98326	1.01646	1.00946	1.00844	1.00402	1.00986	0.981334	0.903522	0.98289	0.977215	0.789796	0.922453		0.988411	0.0426766
120	0.993583	1.02047	0.968022	1.01633	1.00202	0.979652	1.02626	1.00988	0.971985	0.984499	0.994484	1.02713	0.950717	1.02517	1.02577	0.986937	0.914666	0.955116	0.991749	1.00299	0.981305	0.984423	1.0036	1.00592	0.987196	1.0058	1.01518	1.00643	1.00049	0.945012	0.986771	1.01197	0.997513	1.00045	1.23553	0.979895	1.01956	0.915382	0.891064	0.94773	0.946602	1.08936	1.06132		0.996882	0.0522522
130	1.0227	1.0097	0.997057	1.01019	1.04686	1.06649	0.985753	0.98036	0.958086	0.969779	0.960682	0.978819	1.04064	0.947619	0.972439	1.01915	0.918857	0.961945	0.997898	1.00766	0.994124	0.99794	1.00119	1.01118	0.980752	1.01847	1.01386	0.997298	1.0029	0.999102	1.06487	1.01979	1.00596	1.02007	1.10674	0.991337	1.02346	0.943299	0.938928	0.977867	0.997305	1.01045	1.08747		1.00133	0.0376307
140	1.01565	1.00635	0.999663	0.995932	1.06075	1.1008	1.00869	1.00791	0.941225	0.980589	0.981848	0.941125	1.0113	1.03043	1.01668	1.03209	0.905443	1.00486	0.993919	0.999464	1.01809	0.999351	1.00579	1.01198	0.989005	1.03026	1.00785	0.999525	0.94582	0.980167	1.08199	0.994304	0.995722	0.99532	1.33473	0.941339	1.00951	1.01303	0.925815	0.977867	0.993638	1.13987	0.993688		1.00975	0.0658832
150	1.02176	0.958414	0.98496	0.976033	1.06486	1.06947	0.978944	0.969817	0.963267	1.02675	1.00796	0.965896	0.991245	1.03417	1.05926	1.04795	0.903348	0.996203	1.00025	0.986306	1.00049	0.977135	0.996325	0.998837	0.979847	1.01443	0.997791	0.99461	0.943417	1.00917	1.05831	0.999231	0.992138	0.985245	1.06472	0.981033	1.03046	0.996509	0.799925	0.993915	1.00496	1.16702	1.09739		1.00209	0.0543805
160	1.00485	0.902299	0.975467	0.955639	1.06581	1.09961	0.96304	0.960398	0.983089	1.04956	1.05114	1.00697	1.03008	1.03892	1.04538	1.06449	0.800647	0.973772	0.999707	0.982873	1.0033	0.939756	1.00466	0.991527	0.991041	1.03871	0.997791	0.987688	0.885439	1.04145	1.07319	0.991755	0.990858	0.994436	1.20817	0.962511	1.01014	0.996253	0.656988	0.8877	0.904191	1.11904	0.922453		0.9896	0.0858822
170	1.0119	0.917164	0.991474	0.960688	1.04875	1.08917	1.00227	1.00412	0.965817	1.0379	1.06219	1.03898	1.00095	1.03926	1.08365	1.12288	0.888257	1.0178	0.96932	0.964137	1.00813	0.910841	0.988248	1.00115	0.978942	1.02235	0.993259	0.991982	0.855098	1.05399	1.08183	0.98258	0.977036	0.991785	0.925073	0.998685	0.995854	1.08878	1.2412	1.09952	1.11561	1.02339	0.93147		1.01101	0.0692367
180	1.00908	0.904157	0.984773	0.938512	1.03328	1.12139	0.997879	0.995964	0.986049	1.06666	1.06398	1.08698	1.04338	1.00107	1.08102	1.10001	0.966226	1.01591	0.983066	0.964137	0.961989	0.902613	0.996763	1.00865	0.964017	0.973335	1.00174	0.982613	0.922539	0.987637	1.05799	0.962531	0.973196	0.99426	0.950988	0.977098	0.971865	1.08135	1.53428	1.0793	1.16934	0.785061	0.915239		1.01158	0.105811
190	1.0133	0.915306	0.992218	0.884657	1.09202	1.15093	1.01479	1.01986	0.967133	1.04725	1.03429	1.08067	1.01193	1.03739	1.07982	1.01847	0.938559	1.00548	0.999526	0.969572	0.992587	0.870759	0.999212	1.01088	0.9829	0.964624	0.997638	0.986043	0.831667	1.02739	1.07047	0.971706	0.987787	0.999386	0.927298	0.986667	0.943341	1.09191	1.48642	0.963778	1.01676	0.930268	1.00902		1.00748	0.0961194
200	1.02504	0.8774	0.975653	0.911881	1.05633	1.15183	1.01391	0.998353	0.971245	0.978312	0.949836	1.05867	1.00285	1.03332	1.06165	0.944801	0.904605	1.00947	1.03281	0.977629	0.973403	0.857006	0.994534	1.00278	0.983578	0.993045	0.991146	0.990758	0.859154	1.01392	1.03078	0.973575	0.955278	0.985952	0.865391	0.981729	0.959985	1.08852	1.45101	0.986075	1.03461	0.8886	1.04779		0.996377	0.0937065
210	0.966818	0.86811	0.947363	0.883073	1.06202	1.18376	1.01018	1.01171	0.940896	1.05932	1.08294	0.965742	0.992512	1.02059	1.0461	0.923782	0.780107	1.0092	0.979811	0.98478	0.997021	0.814691	0.997384	1.0044	0.957799	0.989877	0.988982	0.98169	0.880182	0.993469	1.05959	1.00195	0.963469	0.973402	0.916959	0.985074	0.975193	1.05727	1.49953	1.02895	1.12422	0.671422	0.895401		0.987831	0.118664
220	0.91141	0.882231	0.960205	0.841889	1.10023	1.15422	1.01036	0.9999	0.982184	1.04025	1.03618	1.05559	1.02143	1.0306	1.07002	0.918624	0.812384	1.01491	0.990302	0.987355	0.993421	0.781191	0.940922	0.922667	0.985613	0.986709	0.983534	0.985642	0.900009	1.0136	1.06535	0.982241	0.964237	0.978528	0.871935	0.981729	0.970258	1.046	1.53232	1.01854	1.08021	0.636067	0.8422		0.98333	0.126039
230	0.86962	0.9324	0.909766	0.8606	1.08949	1.1581	1.01326	1.01044	0.968696	1.03569	1.04471	1.05159	1.01151	1.02958	1.08461	0.933999	0.775915	1.01741	1.01363	0.98068	1.00049	0.811399	0.959707	0.955771	0.973628	0.993837	0.988676	0.98829	0.921487	1.00649	1.05639	0.970857	0.971916	0.986482	0.895887	0.97667	0.995797	1.05747	1.58411	1.11667	1.17827	0.915432	0.933273		1.00071	0.121221
240	1.00485	0.910846	0.962997	0.863273	1.0317	1.00352	1.01387	1.00552	0.967544	1.02393	0.992378	1.08267	1.01214	0.995814	1.07671	1.00202	0.716809	1.00531	1.02033	0.995793	1.0137	0.781308	0.949291	0.938803	0.968992	1.01399	0.986181	0.988992	0.979615	1.00342	1.08199	0.985129	0.978828	0.974109	0.907928	0.959219	0.982712	1.02699	1.54805	1.07857	1.16791	0.830202	0.975654		0.995572	0.115807
250	0.981844	0.859562	0.953877	0.874163	1.03423	1.00681	0.992036	0.971082	0.953398	1.05147	1.0385	1.07375	1.02164	1.01686	1.08509	0.955311	0.637164	0.988097	1.02177	0.990072	1.03372	0.766851	1.00137	1.01054	0.951806	1.00827	0.984577	0.957374	0.995687	1.01892	1.05334	0.988017	0.968077	0.975523	0.899551	0.965709	0.983228	1.0136	1.57493	1.07845	1.1754	0.807789	0.922453		0.991672	0.127096
260	0.987478	0.883346	0.923353	0.856838	1.0917	1.11393	1.0104	1.00116	0.956359	1.0447	1.01733	1.05805	1.02924	0.991062	1.10159	0.987813	0.662315	1.0027	1.02033	0.978964	1.02841	0.762266	0.965992	0.970089	0.940839	1.01443	0.9789	0.979282	0.977513	1.03422	1.01158	0.954885	0.996746	0.986306	0.860287	0.976964	1.00911	1.03211	1.57297	1.0771	1.14861	0.98109	0.900812		0.99719	0.124485
270	0.9964	0.938346	0.970442	0.888023	1.09296	1.1578	1.01655	1.01424	0.921486	1.05646	1.04408	1.10606	1.02713	0.984444	1.07552	1.00543	0.715133	1.00853	0.99826	0.961896	1.02402	0.713604	0.995813	1.00391	0.92467	0.991813	0.94374	0.982111	0.962793	0.999941	1.04822	1.00484	1.00007	0.985598	0.852696	0.976844	1.0009	1.02865	1.56313	1.13174	1.15691	1.00634	0.889089		1.00388	0.124673
280	1.018	0.93463	0.882964	0.773183	1.05981	1.14586	1.02428	0.9999	0.904297	1.03036	1.00333	1.09313	1.01615	1.04774	1.09346	1.04503	0.72184	1.00009	1.04438	0.978916	1.03763	0.727356	0.989893	1.0013	0.938577	0.996476	0.958507	0.98811	0.937259	1.03082	1.03062	0.993115	0.992394	0.998148	0.901122	1.0033	1.01112	1.01693	1.54477	1.13958	1.25066	1.00066	0.947701		1.00589	0.127709
290	0.992174	0.991488	0.926889	0.91	1.10749	1.18436	1.00394	1.00257	0.92017	1.04599	1.0504	1.01898	1.05246	1.03977	1.07456	1.0135	0.643871	0.98521	1.00405	0.972575	1.0486	0.708549	1.0006	1.00929	0.922408	0.996212	0.945319	0.984398	0.935006	1.0168	1.03926	1.00688	0.986251	0.983477	0.88162	0.976549	1.01233	1.04216	1.56117	1.11299	1.18417	0.982353	0.890893		1.0039	0.129218
300	1.02551	0.985171	0.935265	0.920989	1.0917	1.20644	1.00482	0.976986	0.907669	1.08621	1.10474	1.03882	1.02734	1.0362	1.11857	1.03696	0.690401	1.00908	1.02991	0.988165	1.05264	0.715719	0.988467	0.986224	0.935072	1.01038	0.952931	0.979704	0.934555	1.05651	1.06119	0.993794	1.00878	0.984361	0.897326	0.972789	1.01692	1.03768	1.58608	0.966473	1.06698	1.0155	0.887286		1.00763	0.127311
310	0.969166	0.950238	0.929681	0.93574	1.09612	1.19808	0.975078	0.940999	0.944762	1.07061	1.09768	1.0739	1.01995	1.03468	1.09178	1.02304	0.622492	1.00264	0.978364	0.967999	1.04926	0.682572	0.999943	1.00327	0.920939	1.02235	0.960518	0.977517	0.944618	1.044	1.04646	0.969158	1.02106	1.01123	0.940125	0.960878	1.01669	1.03313	1.61559	0.980684	1.08452	0.955837	0.908927		1.00168	0.135089
320	0.997809	0.885947	0.900646	0.90901	1.06265	1.08618	0.998362	0.972769	0.950108	1.05272	1.04387	1.06959	1.04697	0.957801	1.09489	1.0536	0.640937	1.00392	0.991749	0.97453	1.04061	0.68986	1.00732	1.02255	0.930436	1.00501	0.958456	0.979142	0.906017	1.03877	0.98421	0.980032	1.01262	1.01158	0.912378	0.967462	1.04246	1.03134	1.59329	1.05113	1.14606	0.58777	0.809739		0.9861	0.146613
330	0.983722	0.947265	0.927448	0.891982	1.09138	1.13124	1.00961	0.992027	0.952904	1.06602	1.05567	1.08698	1.01214	0.895011	1.07576	1.04795	0.670699	0.99476	1.00821	0.960132	1.02275	0.674579	1.01818	1.03198	0.939821	1.02129	0.952982	0.979764	0.909772	0.963349	1.03974	0.986828	1.03949	0.997795	0.924026	0.987403	1.02363	1.04229	1.52969	1.04267	1.15579	0.723507	0.869252		0.9925	0.13144
340	0.994052	0.981454	0.882592	0.895051	1.11507	1.16347	1.0057	0.988654	0.932754	1.05895	1.0604	1.09759	0.996944	0.997002	1.12168	0.917262	0.733577	1.01153	0.980534	0.958416	1.01511	0.658711	1.00053	1.01387	0.921956	1.0212	0.949163	0.980346	0.90872	0.973735	1.07463	0.98292	1.04077	0.997088	0.912639	0.9866	1.02547	1.03474	1.55658	1.08359	1.22116	0.935003	0.865645		1.00123	0.131102
350	0.990765	0.941691	0.91535	0.784172	1.1337	1.20882	1.01659	1.00215	0.880692	1.06591	1.05756	1.10975	1.01995	0.995475	1.12598	0.926993	0.744476	1.00548	0.981077	0.965329	1.00931	0.651071	1.00429	1.02448	0.930436	1.00316	0.924925	0.972602	0.847588	1.02219	1.06007	0.981391	1.02029	0.993729	0.919576	0.993639	1.01479	1.01623	1.54936	1.06938	1.17253	0.891125	0.814247		0.99438	0.137289
360	0.980905	0.93686	0.949038	0.869708	1.12233	1.21032	1.00297	0.974596	0.886943	1.04059	1.00775	1.0699	1.04465	1.02738	1.10087	0.919111	0.71639	1.00614	1.02214	0.97453	1.01888	0.649308	1.01273	1.02433	0.921504	0.995596	0.921947	0.980707	0.853746	1.0436	1.06743	0.979522	1.00494	1.01317	1.09443	0.963648	1.03058	1.01207	1.55985	1.05186	1.20538	0.962466	0.863841		1.0022	0.134411
370	0.981374	0.907501	0.871797	0.85268	1.11633	1.17481	1.01255	0.992027	0.891384	1.01948	0.952784	1.00682	1.04254	1.01923	1.10111	0.9955	0.689143	1.00586	0.984152	0.98335	1.03074	0.636731	1.00681	1.01546	0.902169	1.01988	0.932894	0.972281	0.873122	0.991232	1.05527	0.979522	1.01364	1.0054	1.12022	0.965923	1.01238	0.991514	1.5651	1.13211	1.28765	0.990244	0.885482		0.999679	0.140771
380	0.961653	0.925339	0.811493	0.891586	1.15044	1.22941	1.02248	1.00594	0.926997	1.03658	0.993642	1.05898	1.02713	1.01448	1.11594	0.970491	0.586442	0.983266	1.01237	0.994649	1.02635	0.623331	0.957258	0.961112	0.900247	1.00114	0.933225	0.977878	0.871771	1.02982	1.05607	0.98394	1.01722	1.01034	0.945753	0.971169	0.989656	0.971281	1.51592	1.08984	1.21414	0.965622	0.819657		0.989583	0.143334
390	0.959775	0.886319	0.925587	0.887825	1.11475	1.16078	0.991377	0.974596	0.926092	1.08301	1.03113	1.06559	0.95135	0.986989	1.11235	1.04941	0.60321	0.984987	1.01526	0.997033	1.02248	0.624036	1.02092	1.03459	0.870284	0.950282	0.93847	0.972622	0.85675	1.00637	1.06535	0.962361	1.03949	1.01194	0.891437	1.001	0.989197	0.992091	1.57756	1.08592	1.22196	1.11083	0.972949		0.998286	0.14441
400	0.973861	0.893008	0.905113	0.854957	1.09833	1.12467	1.0198	0.99273	0.901665	1.03692	1.01228	1.06252	1.02249	0.91843	1.0748	0.963777	0.620816	0.997258	1.02214	0.985257	1.02749	0.629325	1.01248	1.03115	0.875372	0.968408	0.940278	0.965439	0.796219	1.02938	1.07911	0.98394	1.02055	0.999562	0.88005	1.00295	1.00521	0.967311	1.57625	1.15526	1.302	1.03317	0.933273		0.992907	0.147812
410	0.967288	0.852873	0.913861	0.85664	1.12328	1.22553	1.02296	1.0141	0.926174	1.04361	1.02976	1.11867	1.05964	0.981389	1.13029	1.07666	0.633391	0.992816	1.03082	0.982444	1.03368	0.609461	1.00623	1.01834	0.877747	0.954066	0.939921	0.970014	0.839928	1.0341	1.07991	0.968648	1.0057	0.991078	0.837382	0.99843	1.00785	1.01463	1.5592	1.11851	1.28828	1.21184	0.981064		1.00763	0.153641
420	0.992174	0.893751	0.869005	0.850106	1.11981	1.29864	1.03219	1.02309	0.887848	1.07577	1.06767	1.12452	1.00982	0.940321	1.08819	1.03219	0.604467	0.995093	0.997175	0.991264	1.03859	0.610636	1.00714	1.01365	0.903074	0.978966	0.94789	0.979122	0.797721	0.955399	1.07655	0.973235	0.997513	0.990548	0.851779	0.980805	0.952925	1.00989	1.54936	1.07967	1.21096	1.05685	0.898106		0.994267	0.151886
430	0.998278	0.864393	0.937312	0.88931	1.12612	1.25448	1.00908	0.99498	0.899115	1.05014	1.04366	1.09513	0.960005	0.972395	1.10278	1.06333	0.626684	1.0017	1.00097	0.975102	1.0468	0.603936	1.00795	1.01376	0.93869	0.98495	0.941423	0.966503	0.799974	0.962669	1.05126	0.975274	0.987019	0.962443	0.831231	0.983669	0.935536	1.02417	1.56313	0.998816	1.12374	1.00666	0.953111		0.989016	0.14417
440	0.993583	0.88186	0.921492	0.846245	1.13749	1.30491	1.02692	1.01269	0.896154	0.985519	0.885074	1.0299	1.00032	1.03722	1.10087	1.04133	0.596084	1.00037	1.02557	0.974292	1.03715	0.58701	0.959195	0.978762	0.943439	1.01425	0.939539	0.974387	0.804931	1.00789	1.06327	0.968648	0.99393	0.989841	0.853743	0.97323	0.991263	1.0323	1.55002	1.07024	1.23726	1.12125	0.92606		0.993384	0.153504
450	0.967757	0.898954	0.887618	0.783677	1.15107	1.31923	1.02305	1.00355	0.918196	1.09131	1.10579	1.04498	1.02776	0.931666	1.08867	1.13485	0.625007	1.00659	1.01219	0.975913	1.04637	0.60711	0.96877	0.975732	0.94016	1.00624	0.945573	0.974066	0.853446	0.973056	1.07191	0.979012	0.982923	0.985952	0.840131	0.986961	0.979785	1.01085	1.53297	1.13443	1.2717	1.02907	0.911632		1.00013	0.154424
460	0.979026	0.865137	0.893573	0.811001	1.13528	1.3076	0.929871	0.922865	0.915071	1.09311	1.12527	1.0879	0.994411	0.983426	1.11259	1.15344	0.583089	0.987986	0.966245	0.976532	1.04615	0.589831	0.898932	0.882746	0.906353	1.00862	0.945573	0.973605	0.928847	0.980926	1.06311	0.958114	0.972684	0.998502	0.84	0.966606	0.991148	1.03083	1.5015	1.1386	1.29785	1.04485	0.918846		0.993201	0.158374
470	0.978557	0.960272	0.93452	0.78635	1.08033	1.14855	1.02498	1.0051	0.907669	1.10117	1.12917	1.08329	0.967182	0.971886	1.109	1.1441	0.606982	0.978602	0.916685	0.978821	1.00642	0.58078	0.975421	0.975505	0.890184	0.993397	0.94122	0.966703	0.912776	1.0001	1.07671	0.976464	1.0139	0.993022	0.849816	1.00303	1.00222	1.03448	1.50347	1.10087	1.19788	1.09757	0.972949		0.997165	0.143491
480	0.983722	0.821657	0.93694	0.797339	1.10307	1.15601	1.02138	1.00243	0.919019	1.08033	1.08178	1.0839	1.02016	0.892296	1.08509	1.1115	0.585604	0.961057	0.962446	0.957367	1.00646	0.592182	0.973411	0.981944	0.887244	1.00871	0.940379	0.96562	0.902412	1.00222	1.02006	1.00127	1.04077	1.00451	0.88607	0.993158	1.00527	1.0567	1.54936	1.15244	1.31826	1.12598	0.93147		0.997883	0.154837
490	0.97574	0.908616	0.934707	0.875351	1.12865	1.23091	1.03298	1.02675	0.926668	1.06007	1.02207	1.09021	1.00475	0.901459	1.11785	1.06206	0.605306	0.975937	1.00495	0.969047	1.00023	0.585247	1.01123	1.00573	0.890749	0.988821	0.925613	0.953562	0.86381	1.02535	0.997013	0.933987	0.99393	0.98878	0.83254	0.985342	1.00079	1.02846	1.53756	1.15979	1.32942	1.2251	0.935978		1.00124	0.156242
500	1.00203	0.917535	0.866027	0.842285	1.15991	1.28014	1.02955	1.01691	0.923213	1.04844	1.02092	1.12021	1.0227	0.915036	1.109	1.01253	0.568836	0.983488	0.963532	0.956509	1.02845	0.601233	1.00462	1.00353	0.91178	0.977031	0.90415	0.972882	0.882135	1.01856	1.02422	0.979182	1.03156	0.986306	0.833063	0.985743	1.01772	1.02904	1.53887	1.17278	1.31906	1.0578	0.92606		0.999176	0.157488
510	0.968696	0.905643	0.848904	0.872183	1.16149	1.35146	1.03781	1.01691	0.861858	1.10181	1.10242	1.09929	1.02143	0.989365	1.12335	1.02937	0.522726	0.97466	1.00043	0.961276	1.02718	0.56644	1.01058	1.0049	0.875598	0.996828	0.92019	0.966001	0.869518	1.03202	1.00293	0.96559	1.00954	0.985598	0.852565	0.977807	1.01594	1.0535	1.55002	1.1152	1.27075	1.04801	0.930568		0.999962	0.165452
520	0.942401	0.90713	0.715082	0.841493	1.17349	1.31625	1.02252	1.00173	0.935304	1.08991	1.10811	1.05159	1.05373	1.0026	1.13172	1.03112	0.511408	0.961723	0.989216	0.967188	1.04184	0.591947	1.00367	0.995882	0.862709	0.950898	0.899924	0.975089	0.873423	1.01804	1.00485	0.994134	1.02695	0.980296	0.902431	0.973244	1.00154	1.03749	1.55133	1.18417	1.34154	1.09441	0.907124		0.999224	0.171788
530	0.958366	0.739157	0.771105	0.686163	1.16496	1.3061	1.03562	1.03673	0.91614	1.05507	1.02207	1.03713	1.02628	0.975619	1.11259	1.01905	0.47955	0.965832	0.996632	0.976437	1.03539	0.584894	1.00707	1.00929	0.861239	0.984422	0.914843	0.967827	0.882135	0.979448	1.0135	0.993624	1.01799	0.970044	0.904132	0.982906	0.986327	1.06669	1.53625	1.15599	1.28908	1.08526	0.927863		0.986903	0.174231
540	0.993113	0.852501	0.840529	0.714378	1.16528	1.31774	0.960448	0.94859	0.92749	1.086	1.10221	1.11006	1.05077	0.954576	1.11618	1.05369	0.513923	0.968441	1.02376	0.96161	1.04408	0.593827	0.985471	0.973535	0.865422	0.99542	0.927115	0.969993	0.874775	0.981405	1.05094	0.997023	0.995722	0.963681	0.834372	0.986413	0.981219	1.06348	1.56051	1.0379	1.19677	1.11272	0.940487		0.990548	0.166741
550	0.981374	0.926454	0.863236	0.752988	1.12391	1.20584	1.02859	1.00876	0.940156	1.05643	1.02513	1.13544	1.00349	0.909605	1.10087	1.04552	0.466555	0.962334	1.00224	0.965758	1.05264	0.583248	0.994242	1.00251	0.825283	0.989789	0.92215	0.971839	0.894752	0.97789	1.06839	1.00671	1.029	1.01529	0.871019	0.985221	0.99132	1.04364	1.55526	1.13284	1.26883	1.17333	0.906222		0.99456	0.166433
560	0.998278	0.889664	0.828245	0.775361	1.13496	1.2124	1.00601	0.990903	0.942788	1.08322	1.06367	1.09513	1.01446	0.923351	1.11378	1.04601	0.454818	0.971773	1.00278	0.97124	1.02911	0.571612	0.977358	0.976565	0.861465	0.986797	0.9166	0.966763	0.866964	1.00645	1.0439	0.995154	1.03207	0.998679	0.871673	0.977647	1.01365	1.07943	1.53297	1.15403	1.28733	1.1364	0.932372		0.99381	0.166748
570	0.984661	0.876657	0.771849	0.755364	1.18391	1.25209	1.02885	1.01789	0.936866	1.05296	0.98606	1.09959	1.03431	0.980032	1.10852	1.05525	0.493802	0.977992	1.01798	0.971002	1.03341	0.58701	1.00195	1.01206	0.878764	0.998764	0.915276	0.967205	0.815896	1.00034	1.0519	0.992775	1.02183	1.01989	0.830315	0.979748	1.02581	1.08788	1.51265	1.168	1.33373	1.04044	0.93688		0.995306	0.16861
580	0.979966	0.866995	0.924098	0.760314	1.18802	1.32669	1.01655	1.01143	0.901254	1.07067	1.03998	1.12467	1.0208	0.81542	1.065	1.09476	0.462782	0.978214	1.00061	0.959989	1.04	0.585247	0.986494	0.983194	0.846088	0.9648	0.884775	0.970034	0.773238	1.01201	1.06167	1.00348	1.0354	1.016	0.850209	0.99839	1.01525	1.09307	1.51265	1.17143	1.37805	1.16607	0.947701		0.997754	0.179992
590	0.967757	0.871082	0.867702	0.773975	1.18802	1.29208	1.02112	0.999759	0.860131	1.07938	1.07209	1.09959	1.00349	0.986989	1.12431	1.06965	0.426732	0.948953	0.998622	0.955222	1.06818	0.585247	1.00846	1.01971	0.852985	0.985214	0.910031	0.971277	0.910523	1.00549	1.06391	1.03287	1.0098	0.987896	1.07441	0.957653	1.00257	1.10485	1.54871	1.20071	1.35557	1.1364	0.955816		1.00825	0.17776
600	0.989357	0.862164	0.868075	0.767739	1.16939	1.3246	1.03329	1.01958	0.867533	1.0413	1.01102	1.02544	1.02713	0.972734	1.1102	1.0896	0.399904	0.949397	0.973299	0.939107	1.06559	0.572552	1.00389	1.00929	0.822683	0.966824	0.914843	0.969432	0.883486	0.964907	1.06423	0.974934	1.0139	1.01476	1.05294	0.965883	1.01278	1.09492	1.52248	1.19434	1.31475	1.1525	0.932372		0.998259	0.178169
610	1.00157	0.833177	0.890223	0.664284	1.15833	1.29626	1.018	0.993855	0.87658	1.06904	1.0484	1.1076	1.03346	0.915714	1.10733	1.09768	0.467812	0.933017	0.953222	0.933529	1.00844	0.580192	0.997092	1.01145	0.825848	0.889218	0.827287	0.902002	0.783001	1.0184	1.06647	0.967458	0.947087	0.893861	0.814347	0.906744	0.977833	1.05676	1.53232	1.18919	1.30311	1.11904	0.991885		0.976933	0.182445
620	1.00157	0.814224	0.859327	0.64795	1.1817	1.30939	0.975737	0.956041	0.886943	1.10321	1.13359	1.09898	1.01742	0.917072	1.10254	0.994819	0.469908	0.950952	0.982162	0.926807	1.01362	0.574433	1.00214	1.01289	0.814315	0.913239	0.863593	0.886073	0.753412	0.983562	1.06103	0.974085	0.960654	0.937874	0.833063	0.892117	0.955451	1.09921	1.52707	1.18099	1.31587	1.23394	1.01984		0.979972	0.188531
630	0.993583	0.898211	0.786367	0.743979	1.15928	1.23777	1.03153	1.02548	0.875182	1.08764	1.08662	1.1179	1.00539	0.896538	1.07408	0.998031	0.44853	0.939791	1.00748	0.944828	1.04224	0.562326	1.00469	1.0149	0.779604	0.913591	0.890453	0.916487	0.708201	1.01672	1.06039	1.00654	0.980108	0.947772	0.826519	0.906088	0.905348	1.08596	1.53166	1.21713	1.32719	1.20648	0.916141		0.979645	0.186553
640	0.988418	0.90267	0.872728	0.76368	1.19181	1.34161	1.03078	1.00637	0.879787	1.12323	1.15486	1.12637	1.02755	0.768243	1.0693	1.00815	0.430924	0.911585	0.983609	0.941873	1.03719	0.555038	0.993584	1.00319	0.795772	0.928197	0.903412	0.916206	0.654579	1.01932	0.968687	0.958963	0.977804	0.950247	0.783459	0.894579	0.983687	1.10683	1.55264	1.22656	1.32846	1.18217	0.903517		0.980178	0.198101
650	0.940053	0.89338	0.839226	0.718932	1.20002	1.26045	1.04067	1.04165	0.876662	1.09321	1.10052	1.11421	1.03431	0.843082	1.08413	1.06148	0.458171	0.942012	0.948519	0.969667	1.02367	0.573257	0.996727	1.00959	0.782317	0.911831	0.881466	0.891048	0.650373	1.0009	0.978609	0.957944	1.0162	1.01034	0.807803	0.973538	0.961993	1.12291	1.51265	1.15097	1.18481	1.23047	0.969342		0.978119	0.183313
660	0.963062	0.935373	0.874403	0.764967	1.1697	1.36369	1.03623	1.0297	0.85133	1.09168	1.08547	1.14821	1.02396	0.871422	1.06954	1.0897	0.482484	0.968664	1.03136	0.960227	1.04672	0.576313	1.00224	1.00853	0.744892	0.934444	0.889562	0.920981	0.69243	0.959234	1.03766	0.991925	1.03207	1.03226	0.852434	1.00448	0.972152	1.1021	1.51986	1.19336	1.28844	1.25351	0.961226		0.996	0.1864
670	0.965879	0.937974	0.81261	0.762789	1.17602	1.35056	1.02933	1.029	0.860542	1.1201	1.14496	1.11898	1.03515	0.933364	1.10326	1.05759	0.416672	0.97516	1.02069	0.958225	1.04628	0.57455	0.972497	0.981527	0.739804	0.908047	0.865452	0.932216	0.698588	0.983083	1.07383	0.980372	1.0784	1.01635	0.880573	1.00993	0.974964	1.11202	1.51986	1.18442	1.2505	1.29202	0.955816		0.996278	0.192193
680	0.981374	0.921623	0.824336	0.707745	1.20633	1.3625	1.0328	1.01157	0.882419	1.11354	1.14317	1.06621	0.999055	0.865483	1.08365	1.03452	0.408288	0.945954	1.02449	0.960704	1.03065	0.568791	0.947903	0.947931	0.763661	0.936028	0.87314	0.93338	0.697086	0.960033	1.04694	0.98343	1.05357	1.02484	0.948763	0.989089	1.02656	1.12329	1.56182	1.1408	1.24141	1.08905	0.953111		0.986443	0.190097
690	0.971983	0.947637	0.804049	0.747345	1.18044	1.33863	1.00579	0.988232	0.886367	1.11157	1.13254	1.1236	1.03388	0.909435	1.10254	1.02401	0.46404	0.972217	1.00314	0.950788	1.04026	0.559975	0.88976	0.877557	0.740482	0.911567	0.861276	0.934965	0.673655	0.988436	1.04918	0.952676	1.05946	1.013	0.885809	1.00322	1.04228	1.12002	1.52969	1.13774	1.23455	1.22542	0.987376		0.986432	0.188045
700	0.991704	0.937603	0.860444	0.764373	1.2117	1.38876	1.00798	1.00496	0.851824	1.1028	1.10747	1.15129	0.99019	0.836463	1.08915	0.994235	0.411641	0.956893	1.02955	0.952933	1.03003	0.563384	0.911942	0.91282	0.701248	0.911919	0.859087	0.94323	0.723672	0.904785	1.06359	0.979862	1.07174	1.03385	0.89196	1.00813	1.04205	1.10773	1.55395	1.21749	1.28717	1.25288	0.988278		0.990763	0.199595
710	0.958366	0.888177	0.825639	0.769422	1.2117	1.32102	1.02534	1.00637	0.890973	1.12428	1.12022	1.13498	1.00201	0.876174	1.10135	1.06683	0.397389	0.966609	1.01798	0.956986	1.04202	0.55351	0.91377	0.911191	0.679199	0.925029	0.867717	0.934543	0.784353	0.978289	1.0199	0.999401	1.06176	1.03385	0.861465	1.00696	1.03264	1.11125	1.52576	1.2023	1.30343	1.33306	1.00812		0.994217	0.198423
720	0.944279	0.86142	0.856163	0.734178	1.19307	1.26045	1.02389	1.01775	0.875593	1.14084	1.17087	1.14744	1.00307	0.767225	1.03008	1.09028	0.413318	0.96772	1.04203	0.935579	1.03535	0.568791	0.956308	0.957514	0.727027	0.922389	0.853918	0.929568	0.792464	0.980207	1.01398	0.973065	1.05843	1.03067	0.851256	1.02572	1.056	1.13648	1.51592	1.21382	1.30535	1.24309	0.963931		0.990383	0.193519
730	0.958835	0.86365	0.766824	0.670323	1.19718	1.33744	1.01664	1.00327	0.866546	1.14322	1.13917	1.15944	1.03726	0.702229	1.06715	1.11344	0.422121	0.960391	0.94454	0.951455	1.03328	0.574198	0.985544	0.985315	0.689375	0.890361	0.823341	0.9078	0.71511	1.01668	0.995572	0.9452	1.07917	1.0236	0.891044	1.01215	1.05273	1.12508	1.53887	1.20745	1.28063	1.28255	0.940487		0.984108	0.207327
740	0.928314	0.851015	0.753051	0.675372	1.22244	1.35892	1.00416	1.00693	0.84582	1.13023	1.13201	1.17375	1.04887	0.774013	1.06547	1.11996	0.476615	0.988541	0.935134	0.962278	1.02705	0.559857	1.00221	0.994443	0.653759	0.893881	0.82217	0.919517	0.708501	1.01856	1.01062	0.962871	1.07968	1.00487	0.863559	1.00021	1.06426	1.12937	1.54018	1.19802	1.31236	1.27403	0.954914		0.987158	0.207437
750	0.953201	0.801589	0.798651	0.682401	1.22812	1.4189	1.0238	1.02099	0.804532	1.12802	1.11348	1.12206	1.02924	0.756703	1.08748	1.10468	0.552907	0.974382	0.90963	0.958082	1.00027	0.568791	1.00605	0.993155	0.669588	0.895817	0.835715	0.92712	0.73704	1.01732	1.0399	0.986828	1.0464	1.0388	0.886725	0.995218	1.03855	1.11644	1.55723	1.19091	1.32894	1.26614	0.96844		0.990238	0.203949
760	0.942871	0.844326	0.792137	0.682401	1.22528	1.40845	1.01106	1.00566	0.8473	1.13441	1.11674	1.18037	1.05246	0.808972	1.07145	1.00689	0.506797	0.936404	0.917046	0.952218	1.00549	0.558447	1.0078	0.998534	0.67739	0.915966	0.864306	0.934102	0.784203	0.973855	1.04134	0.989207	1.05127	1.02837	0.858585	1.03407	1.04251	1.14256	1.56903	1.17523	1.34186	1.34411	0.982867		0.99452	0.206516
770	0.949914	0.858819	0.773338	0.666561	1.23065	1.40845	1.01062	1.00777	0.892865	1.16399	1.19782	1.1696	1.00982	0.799977	1.07026	1.0461	0.505958	0.951063	0.95087	0.948261	1.008	0.56644	1.00078	0.987966	0.679765	0.897049	0.824411	0.918634	0.67756	0.972417	1.07207	0.994814	1.04282	0.996911	0.79105	1.00321	1.04906	1.1343	1.54412	1.17829	1.30088	1.34379	0.987376		0.990335	0.210307
780	0.969166	0.768886	0.808329	0.684084	1.17096	1.29596	1.00829	0.98289	0.87806	1.12965	1.13696	1.14683	1.03431	0.816099	1.06882	1.06469	0.494221	0.996425	0.956478	0.953315	0.998997	0.561033	1.0036	0.999215	0.686209	0.895465	0.846586	0.930832	0.703094	0.992591	1.06743	0.989547	1.04231	1.00274	0.80741	1.00895	1.06208	1.12867	1.52248	1.14913	1.26851	1.29897	0.978359		0.983922	0.195948
790	0.946627	0.80419	0.817263	0.64102	1.19307	1.38458	1.01532	0.981344	0.876498	1.11725	1.08652	1.16498	1.02607	0.863446	1.07719	1.12463	0.557938	1.00942	1.01942	0.965186	1.02433	0.561503	1.00751	0.999443	0.720921	0.867044	0.823061	0.900618	0.704146	0.994548	1.06103	0.962701	1.05946	0.997971	0.898373	1.00368	1.05853	1.13565	1.56051	1.17596	1.27043	1.14397	0.888188		0.988175	0.194836
800	0.965409	0.784123	0.84909	0.616468	1.19654	1.29238	1.00078	0.976564	0.859308	1.12707	1.10147	1.1696	1.01932	0.78708	1.07121	1.13543	0.499251	0.994982	0.977821	0.952218	1.0231	0.571612	1.00747	0.986527	0.746022	0.901008	0.847859	0.927401	0.695584	1.01656	1.05783	0.990736	1.07738	1.01918	0.925597	1.02165	1.06834	1.15562	1.52838	1.1756	1.28047	1.22542	0.91073		0.989214	0.195613
810	0.974331	0.779663	0.762729	0.629041	1.2177	1.38787	1.01242	0.986826	0.808151	1.15025	1.13854	1.1536	1.02818	0.79862	1.0638	1.1476	0.427571	0.980324	0.997356	0.945973	1.03737	0.565382	0.994826	0.980997	0.715494	0.881651	0.843123	0.930852	0.691979	0.985879	1.08599	0.96406	1.04231	1.0107	0.846151	1.00468	1.04378	1.18252	1.53035	1.21664	1.29913	1.30528	0.984671		0.989171	0.214216
820	0.986539	0.801218	0.764591	0.620824	1.22402	1.43203	0.99063	0.948309	0.855607	1.16202	1.18803	1.17252	1.04592	0.845967	1.09083	1.15791	0.455237	0.974327	1.00242	0.955698	1.02336	0.567968	1.00243	0.980353	0.70464	0.859653	0.815347	0.910127	0.630397	0.943015	1.06167	0.986658	1.02593	1.01529	0.940386	0.996316	1.02466	1.15153	1.55067	1.22325	1.33404	1.35294	1.01984		0.995235	0.220732
830	1.00908	0.749934	0.818752	0.636961	1.22023	1.43501	0.999592	0.965881	0.830111	1.16613	1.18919	1.13298	1.02966	0.873968	1.076	1.13719	0.420025	0.989263	1.01978	0.962659	1.01945	0.543989	0.995703	0.982057	0.663257	0.855166	0.816671	0.914862	0.644065	1.01432	1.07511	0.981051	1.04794	1.03226	0.917875	0.999113	1.01933	1.17355	1.58543	1.18785	1.25624	1.30623	1.02615		0.99349	0.220897
840	0.998748	0.740271	0.833642	0.643594	1.21518	1.42636	0.998406	0.969114	0.884804	1.12	1.09421	1.13806	1.04549	0.834597	1.09728	1.12697	0.428828	0.959391	0.960819	0.955984	1.03583	0.538347	0.990989	0.970732	0.69435	0.846103	0.810815	0.904309	0.640911	0.981325	1.06871	0.976464	1.04845	1.01635	0.903347	1.01947	1.05095	1.1537	1.56051	1.19912	1.39017	1.41829	1.0018		0.992855	0.224803
850	0.968227	0.747704	0.893201	0.667452	1.21865	1.43054	0.976528	0.935657	0.883571	1.15607	1.15528	1.18237	1.01404	0.693744	1.0351	1.15821	0.460686	0.944955	0.912344	0.95074	1.02301	0.564442	0.991281	0.973194	0.659639	0.830441	0.801777	0.886655	0.621084	1.0295	1.05943	0.98343	1.04999	1.02077	0.91565	1.02261	1.04303	1.15076	1.58477	1.21039	1.34218	1.33053	0.976555		0.987353	0.224745
860	1.00344	0.755136	0.869936	0.641614	1.1776	1.39264	0.980306	0.941843	0.886778	1.15624	1.1496	1.18037	1.01235	0.832391	1.06093	1.16171	0.491706	0.97144	0.918674	0.94931	1.01045	0.548808	0.998006	0.974747	0.657377	0.840824	0.832379	0.898772	0.639409	0.982963	1.09127	0.978503	1.07123	1.00522	0.895494	1.00526	1.04739	1.17682	1.55854	1.19667	1.35222	1.36273	0.979261		0.99159	0.217735
870	0.994522	0.750305	0.824522	0.532715	1.2117	1.4744	0.997308	0.97783	0.867615	1.14107	1.12064	1.18206	1.04613	0.768243	1.05041	1.13115	0.501347	0.981712	0.922111	0.953696	1.03337	0.555861	1.00056	0.978952	0.692541	0.822962	0.816925	0.881719	0.599906	1.00122	1.05014	0.976973	1.06688	1.02979	0.874684	1.02482	1.0451	1.15204	1.51133	1.18001	1.3798	1.33022	0.948602		0.985672	0.224824
880	0.982313	0.810136	0.871239	0.508658	1.22086	1.46873	0.967917	0.945638	0.837348	1.1306	1.10547	1.19668	1.04486	0.668458	1.03151	1.09515	0.500928	0.983988	0.908726	0.95484	1.03227	0.549161	0.989418	0.965695	0.672528	0.817682	0.819751	0.834693	0.622586	1.00809	1.05591	0.990396	1.05076	1.00363	0.856229	1.01614	1.01192	1.20237	1.51265	1.23318	1.41185	1.40377	0.949504		0.982424	0.233867
890	0.585068	0.796758	0.688094	0.921682	1.18486	1.42696	1.02283	1.00327	0.819336	1.07689	1.00396	1.10883	0.971403	1.01278	1.06428	1.0752	1.30702	0.981934	0.836194	0.939822	0.942058	0.519187	1.06156	1.02425	0.784126	0.908839	0.923831	0.968569	0.709703	0.994428	1.07223	0.999571	1.07456	1.02325	0.876909	1.03169	1.01124	1.19059	1.55199	1.2371	1.41759	1.39682	0.954914		1.01168	0.210322
900	0.569103	0.745474	0.688467	0.916633	1.19023	1.37653	1.02481	0.979798	0.857252	1.00911	0.976688	1.00559	0.925598	1.05928	1.0748	1.0136	1.59375	0.982045	0.874359	0.935865	0.921161	0.522009	0.975786	0.936795	0.825283	0.932596	0.949519	0.97517	0.787357	0.996745	1.04726	0.960322	1.00929	0.979058	0.808196	1.00232	1.00326	1.18373	1.55067	1.16396	1.26548	1.3078	1		0.997739	0.209013
910	0.570981	0.751792	0.712476	0.894457	1.11917	1.39652	1.02802	0.986826	0.795979	0.993337	0.939621	0.98082	0.887603	1.02704	1.04801	1.0282	1.8067	1.01081	0.879062	0.905496	0.921073	0.516366	0.988467	0.951908	0.885322	0.952658	0.967596	0.985762	0.852094	0.992551	1.13512	1.00008	1.03361	0.982063	0.84589	0.9955	1.01835	1.16965	1.54871	1.20157	1.32751	1.37757	0.951307		1.00846	0.228505
920	0.559242	0.749934	0.654592	0.925444	1.14728	1.37682	1.01396	0.962507	0.828055	1.00116	0.971844	1.01421	0.833566	0.967304	0.999943	1.02372	1.93371	0.974271	0.90746	0.877797	0.904084	0.501321	1.01653	0.978459	0.878651	0.933124	0.97643	0.992122	0.952579	0.992591	1.07911	0.967289	1.02618	0.978528	0.884762	1.01861	0.996256	1.15345	1.53822	1.21039	1.31108	1.34347	0.988278		1.00801	0.237812
930	0.58272	0.746217	0.658315	0.919306	1.09833	1.25955	1.00702	0.950699	0.815224	0.983819	0.952152	1.01097	0.81879	1.03773	1.02577	1.0063	1.99952	1.03651	0.877434	0.859633	0.904523	0.496384	0.983205	0.940356	0.871302	0.930308	0.982312	0.984539	0.952429	0.978129	1.06647	0.970687	0.998537	0.960676	0.837644	0.978142	0.984548	1.16549	1.52904	1.21921	1.39431	1.28697	0.903517		0.99918	0.242792
940	0.575677	0.738413	0.683255	0.918514	1.13749	1.39145	0.981843	0.934252	0.841625	1.00571	0.982269	1.01482	0.837366	0.982577	1.01692	1.00319	2.04437	0.981767	0.809425	0.85353	0.881168	0.486393	1.00944	0.963574	0.899343	0.920102	0.97666	0.98187	0.98262	0.933667	1.03046	0.912068	0.985739	0.942293	0.839346	0.984981	0.945866	1.17125	1.49625	1.23318	1.36115	1.34789	0.933273		0.998908	0.251763
950	0.575677	0.770373	0.647892	0.90901	1.12107	1.30073	0.972749	0.938188	0.827068	0.985383	0.954574	0.991282	0.809714	1.03247	1.02051	0.991316	2.13953	0.985543	0.835833	0.848048	0.873661	0.484277	1.00656	0.966112	0.916981	0.972367	0.966348	0.967586	0.995537	0.94713	0.98437	0.931778	0.979852	0.961383	0.849423	0.964893	0.961305	1.16971	1.51265	1.24249	1.38714	1.34853	0.923354		0.999311	0.260452
960	0.57192	0.806792	0.676369	0.907921	1.13654	1.34698	0.966906	0.947606	0.784629	0.952103	0.944465	0.986974	0.796205	1.02212	1.01668	0.952975	2.16594	1.00126	0.907822	0.840324	0.870632	0.449132	1.02541	0.974179	0.963565	0.950106	0.946515	0.946139	1.0035	0.937422	0.999573	0.904592	0.953999	0.946889	0.828875	0.932533	0.952638	1.12009	1.52969	1.24959	1.30439	1.41734	0.966637		0.997813	0.266221
970	0.56206	0.816082	0.653103	0.930295	1.10402	1.30819	0.954825	0.930035	0.788741	0.99864	0.992273	0.99759	0.803804	1.02534	1.00879	0.962123	2.10054	1.03285	0.862783	0.854674	0.897894	0.442197	0.992085	0.946378	0.95599	0.988029	0.94621	0.952238	0.993134	0.928714	1.02294	0.921923	0.96219	0.95555	0.826257	0.930512	0.940816	1.17503	1.45167	1.25853	1.36243	1.39682	0.949504		0.997298	0.257233
980	0.558303	0.805305	0.609365	0.948313	1.15833	1.38607	0.931673	0.917945	0.829782	0.961213	0.922983	0.942971	0.808025	1.07065	1.01453	0.993652	2.10599	1.01147	0.84361	0.856868	0.874846	0.489449	1.00831	0.958953	0.946605	0.951426	0.941245	0.950513	0.967149	0.926476	1.06471	0.92821	0.95963	0.9103	0.748514	0.914948	0.934503	1.17816	1.48773	1.19226	1.43401	1.40598	0.937782		0.995088	0.266186
990	0.567225	0.777434	0.654592	0.947818	1.14191	1.4007	0.951442	0.925114	0.776239	0.992317	0.971844	1.00282	0.81879	1.01211	0.994921	1.00163	2.11564	1.01986	0.889191	0.853149	0.89008	0.490154	1.02074	0.961036	0.94016	0.931452	0.940252	0.948607	1.00575	0.894518	1.02678	0.895417	0.959374	0.928506	0.805185	0.927314	0.907931	1.18053	1.50084	1.24408	1.36705	1.39177	0.853922		0.995958	0.264213
1000	0.555486	0.768515	0.639889	0.962668	1.13465	1.37265	0.91142	0.90698	0.806506	1.00133	1.00659	1.00836	0.819213	1.0026	0.98942	0.986548	2.12067	1.0057	0.885755	0.868214	0.887182	0.480751	1.01917	0.960354	0.955764	0.924853	0.941983	0.944655	1.01086	0.873146	1.02038	0.914617	0.928914	0.954312	0.837775	0.934955	0.911604	1.17669	1.48183	1.23918	1.37933	1.42649	1.04599		1.00009	0.264073
1010	0.565816	0.760711	0.610481	0.954847	1.1176	1.2888	0.901228	0.895594	0.827068	0.991332	0.968369	0.996205	0.798738	0.981898	0.993486	0.990343	2.1345	1.02541	0.819373	0.843852	0.862115	0.463002	1.01873	0.964559	0.983239	0.890625	0.924213	0.935647	0.984272	0.919725	1.00757	0.931098	0.922002	0.956964	0.901253	0.917424	0.925205	1.1539	1.52051	1.26809	1.31667	1.483	1.03517		0.9942	0.267559
1020	0.570981	0.789697	0.561903	0.969796	1.11254	1.33744	0.933562	0.924271	0.803792	0.959547	0.943517	1.01082	0.831455	1.00057	0.978179	0.985769	2.17768	1.01064	0.821724	0.832601	0.865408	0.474991	1.00773	0.961566	0.976681	0.912359	0.939514	0.929488	0.985473	0.882414	1.02518	0.901534	0.892822	0.924617	0.803222	0.904027	0.911145	1.11746	1.46413	1.26993	1.30614	1.53035	0.989179		0.989112	0.274242
1030	0.569103	0.770744	0.629652	0.96049	1.13812	1.36817	0.931102	0.92638	0.795485	1.01584	1.00596	1.00051	0.8266	0.982408	0.982006	0.978666	2.18312	0.95878	0.807797	0.829693	0.8248	0.482984	0.973557	0.922516	0.954181	0.910951	0.934142	0.926318	0.953931	0.871348	1.04038	0.883014	0.885399	0.918431	0.810944	0.902769	0.903856	1.17797	1.47265	1.27471	1.34728	1.38041	0.904418		0.98413	0.272087
1040	0.567694	0.796758	0.695912	0.976825	1.10117	1.29596	0.961942	0.95829	0.795156	1.01754	0.972686	0.998513	0.819846	1.04859	0.988942	0.933707	2.20953	0.982933	0.832758	0.810098	0.818742	0.467233	0.993584	0.940772	0.961869	0.899776	0.920495	0.916507	0.956785	0.876581	1.04534	0.87146	0.863641	0.928683	0.943658	0.874036	0.88331	1.16741	1.44249	1.28255	1.34329	1.32801	1.00271		0.988227	0.266907
1050	0.577555	0.786353	0.697587	0.985339	1.11539	1.3255	0.9579	0.950558	0.803052	0.958731	0.922878	0.976204	0.839054	1.0805	1.03127	0.938184	2.23468	1.00636	0.834928	0.797226	0.829014	0.458183	0.998115	0.936416	0.9656	0.876899	0.925002	0.923349	0.999442	0.859883	1.04646	0.887432	0.858522	0.885731	0.990776	0.872658	0.86724	1.18021	1.48904	1.25143	1.35637	1.3501	0.981064		0.990888	0.27402
1060	0.584599	0.725778	0.691258	1.00801	1.11286	1.36757	0.94393	0.935798	0.805684	0.975762	0.959523	0.948818	0.818579	0.988687	0.990855	0.935459	2.2175	1.00459	0.838546	0.802708	0.826995	0.475932	0.996909	0.940431	0.968653	0.8725	0.920903	0.912495	1.02948	0.82393	0.992852	0.873159	0.868761	0.914542	0.858454	0.889668	0.861501	1.18105	1.50084	1.2431	1.3189	1.38767	0.972047		0.983425	0.274831
1070	0.574738	0.729866	0.689769	1.02108	1.0797	1.30819	0.875088	0.895313	0.809385	0.999116	0.985849	0.968665	0.81668	1.05148	1.01214	0.940811	2.21708	0.993594	0.842344	0.793698	0.825502	0.467469	0.986019	0.933197	0.973176	0.8344	0.90247	0.904971	0.918483	0.869071	1.0383	0.889131	0.839324	0.901639	0.842749	0.869245	0.809218	1.19885	1.52248	1.20843	1.40404	1.45017	0.984671		0.980874	0.281475
1080	0.579903	0.761454	0.655523	1.0093	1.06896	1.22374	0.902721	0.901498	0.797212	0.963389	0.94099	0.997128	0.812458	0.961364	0.962394	0.932248	2.22169	0.976048	0.836375	0.770718	0.807635	0.454539	0.98156	0.921039	0.973628	0.82129	0.883757	0.91097	0.92359	0.837033	0.993012	0.899325	0.847771	0.869292	0.766052	0.862674	0.787696	1.16126	1.51527	1.28046	1.40723	1.49026	1.02344		0.969626	0.285403
1090	0.566286	0.747704	0.684744	1.00425	1.0737	1.21479	0.907158	0.92891	0.80593	0.97889	0.945202	0.990205	0.784384	0.976298	0.990616	0.936043	2.21456	0.996925	0.869657	0.785927	0.817951	0.459593	0.970853	0.911759	0.952824	0.85015	0.889129	0.912515	0.88619	0.853371	0.990931	0.894568	0.855962	0.872827	0.795369	0.883512	0.823336	1.16946	1.48314	1.24763	1.43051	1.42302	0.997295		0.97149	0.278059
1100	0.567694	0.788582	0.686978	1.02108	1.07023	1.24821	0.946829	0.973331	0.810947	0.972499	0.977214	0.978204	0.795993	0.984274	0.978657	0.94665	2.21037	0.982489	0.832758	0.790837	0.835775	0.457007	0.975129	0.899525	0.953954	0.884554	0.887729	0.896244	0.927495	0.843824	1.00485	0.896777	0.821662	0.850556	0.727834	0.855769	0.795214	1.16203	1.47462	1.25143	1.39989	1.46532	1.03156		0.973548	0.279646
1110	0.570981	0.800103	0.685116	0.993259	1.11128	1.33027	0.910014	0.922865	0.769331	0.974946	0.973845	0.973896	0.8266	0.978504	1.0009	0.959592	2.21624	0.978269	0.841982	0.785164	0.804255	0.430795	0.972388	0.89623	0.935637	0.881387	0.88279	0.886494	0.935907	0.795047	0.992532	0.877917	0.813471	0.826694	0.747205	0.845772	0.798026	1.20871	1.42019	1.25768	1.37614	1.49278	1.07304		0.971029	0.284942
1120	0.569573	0.801589	0.700937	1.02999	1.10623	1.3064	0.929652	0.946622	0.78578	0.955842	0.919298	0.956972	0.809925	1.02212	1.02147	0.978471	2.26026	0.972939	0.846504	0.78669	0.806625	0.421744	0.95777	0.858884	0.896177	0.864053	0.868965	0.863362	0.978564	0.811026	1.00581	0.858887	0.818335	0.876363	0.774297	0.865217	0.790795	1.19846	1.4261	1.28818	1.36035	1.38988	0.976555		0.968922	0.28454
1130	0.560651	0.7949	0.687722	1.01365	1.11886	1.32848	0.917922	0.942264	0.804943	0.993065	0.962156	0.98205	0.835044	0.981729	0.987746	0.942271	2.25606	0.952784	0.876711	0.776964	0.808469	0.462062	0.871231	0.814265	0.900699	0.866516	0.859774	0.896465	0.91578	0.829243	0.992692	0.863135	0.820382	0.882549	0.775475	0.872404	0.822418	1.2096	1.3802	1.29958	1.35796	1.41482	1.01172		0.968451	0.282461
MAX	1.03443	1.06247	1.03037	1.04721	1.23065	1.4744	1.04067	1.04165	1.08458	1.16613	1.19782	1.19668	1.05964	1.0805	1.13172	1.16171	2.26026	1.03651	1.04438	1.03899	1.06818	1.05283	1.06156	1.03459	1.03276	1.03871	1.01615	1.03399	1.08386	1.05651	1.13512	1.03287	1.07968	1.0388	1.33473	1.03422	1.06834	1.2096	1.61559	1.29958	1.43401	1.53035	1.09739		1.15838	0.225407
