# Supplementary material for: Selective inhibition reveals the regulatory function of DYRK2 in protein synthesis and calcium entry
Source: eLife journal article supplement (doi:10.7554/elife.77696), 2022-04-19
Supplement: fig5-figsupp1-data1 [file Raw data of quantitative analysis of phosphorylation sites on STIM1 by DYRK2 upon C17 treatment for Figure 5—figure supplement 1-source data 1.xlsx]

## Sheet: Sheet1
			Intensity of phospho peptides upon different condtions									Average intensity of three replicates			Significance(P-value)
Peptide number	Phospho (STY) sies	Positions within proteins	Control_1	Control_2	Control_3	1_1	1_2	1_3	10_1	10_2	10_3	Control	1	10	Control-1	Control-10
1	DLEGLHRAEQpSLHDLQER	257	1.68412e+09	1.64369e+09	8.41942e+08	1.1117e+09	1.22781e+09	8.54497e+08	1.33705e+09	7.42387e+08	7.03666e+08	1.38992e+09	1.06467e+09	9.27701e+08	0.332952	0.248344
2	AHSLMELSPSAPPGGpSPHLDSSR	608	1.7139e+08	9.32707e+07	2.28023e+08	6.66905e+07	1.92911e+08	2.28489e+08	2.30827e+08	1.19269e+08	1.03151e+08	1.64228e+08	1.62697e+08	1.51083e+08	0.981698	0.825975
3	KAVAEEDNGpSIGEETDSSPGR	660	3.85606e+07	3.09343e+07	1.95288e+07	1.46103e+07	3.04808e+07	2.02458e+07	5.88998e+07	1.51865e+07	3.25434e+07	2.96746e+07	2.17789e+07	3.55433e+07	0.335701	0.693736
4	DLTHpSDSESSLHMSDR	519	4.89976e+08	1.87598e+08	4.36792e+08	1.27536e+08	4.08532e+08	3.96876e+08	3.71304e+08	2.26738e+08	2.28211e+08	3.71455e+08	3.10981e+08	2.75418e+08	0.667888	0.411359
5	DLTHpSDpSESSLHMSDR	519521	2.60088e+08	3.0582e+08	2.89759e+08	7.90134e+07	2.52049e+08	2.87423e+08	2.39299e+08	1.42084e+08	1.49717e+08	2.85222e+08	2.06162e+08	1.77033e+08	0.295616	0.0333615
6	LPDpSPALAK	575	3.53961e+09	2.62946e+09	2.57802e+09	7.3136e+08	1.23657e+09	1.62092e+09	1.73369e+09	1.31502e+09	1.75414e+09	2.9157e+09	1.19628e+09	1.60095e+09	0.0131866	0.0186627
7	SHpSPSSPDPDTPSPVGDSR	618	3.134e+09	2.60403e+09	1.5804e+09	2.17058e+09	2.61125e+09	1.6665e+09	2.15626e+08	1.36043e+09	1.72134e+09	2.43948e+09	2.14945e+09	1.09913e+09	0.614233	0.105622
8	SHpSPpSpSPDPDTPSPVGDSR	618620621	9.27078e+07	1.13105e+08	1.52502e+08	1.56564e+07	4.59755e+07	1.75583e+08	6.54344e+06	5.13861e+07	2.39986e+07	1.19438e+08	7.90717e+07	2.73094e+07	0.481624	0.0135575
9	SHpSPSpSPDPDTPSPVGDSR	618621	2.61182e+08	2.55724e+08	2.12237e+08	7.26214e+07	3.13124e+08	2.28656e+08	2.93684e+08	5.63858e+07	4.06844e+06	2.43047e+08	2.048e+08	1.18046e+08	0.62399	0.239109
10	SHpSPSSPDPDpTPpSPVGDSR	628626618	8.3924e+07	9.72882e+07	5.87372e+07	4.10329e+07	1.01127e+08	7.44761e+07	3.15451e+07	3.15516e+07	4.22178e+07	7.99831e+07	7.22119e+07	3.51049e+07	0.726845	0.019306
