# Supplementary material for: Selective inhibition reveals the regulatory function of DYRK2 in protein synthesis and calcium entry
Source: eLife journal article supplement (doi:10.7554/elife.77696), 2022-04-19
Supplement: table1-data1 [file Table 1—source data 1 Raw data of inhibitors against kinases for Table 1.xlsx]

## Sheet: DYRK2-1
Compounds against DYRK2 data
positive control	LDN192960			1			2			3			4			5			6			7			8			9			10			11			12			13			14			15			16
792200	834040	781200	871440	759880	882200	820040	733800	513800	586880	588920	721520	625960	779720	616920	732160	642840	782960	640680	787640	733320	860360	723360	851520	726320	854400	695400	762360	756920	837680	793560	865280	807440	886560	822600	898960	802800	867240	832080	857280	727560	783720	696240	811240	601480	624480	672280	885960	762600	800680
817980	783760	806600	773240	803200	829960	901440	631640	760600	669240	741280	657160	781320	702040	790400	686720	750160	662320	768240	674120	782840	702560	775720	694000	782360	804800	863880	803840	856400	755360	813760	763480	809760	788480	902880	788360	819400	750920	804320	773120	522840	479360	526440	703280	812560	712840	742840	674960	776840	712440
835600	733200	761320	652960	686320	740600	684360	794280	561360	627360	604640	758720	663120	790920	664680	784040	688440	823280	711440	825880	700640	818160	620720	729400	591720	732520	793120	731080	798640	930080	755840	876880	779440	954280	836280	887320	756600	871720	770400	858480	657480	740920	619680	862440	677080	722040	694240	838320	720840	800640
886900	785000	690520	682280	510840	537800	467280	613000	525920	539360	563200	665440	589600	696520	567320	562920	786000	660920	764400	602520	519280	586680	476080	500960	465520	811680	648760	735560	836320	767800	813600	717520	807000	726120	879320	761640	853080	760840	876680	776640	770240	665840	761400	583840	673760	587520	788520	663680	771600	498200
841300	295760	242560	272880	378960	336760	378720	420800	454040	430200	429960	367760	343320	370360	447080	374680	457760	464480	395680	142400	239160	217920	287680	203280	287280	577040	661880	582840	648160	717000	730200	737720	658000	764720	730640	773280	720400	758320	643400	713440	523400	609760	513920	591880	417720	446960	725560	652120	770560	305040
825760	154440	151000	148360	241680	144520	180360	245600	259560	160880	262200	188920	267880	154520	157080	156160	112360	101240	118480	81520	69640	71200	55920	48680	56280	406880	295760	329360	344080	361240	362200	345280	390640	346160	388880	317040	386360	277240	324840	271480	244600	221880	247880	162000	170320	157640	297440	407240	374120	123240
874200	44520	43640	44440	62160	66760	187960	72320	54680	62200	67280	60000	55400	61440	53400	57200	53920	61880	51720	27240	51440	65560	48600	51240	42520	99240	119040	130480	191880	122720	219720	128520	77120	105120	111560	120120	99480	94840	84280	93440	81400	92840	88680	227000	170640	194000	85840	98640	87240	182280
896750	38400	39880	39360	41160	36080	71720	34080	36960	38680	43600	39960	42600	39920	44240	38720	53600	49760	53160	11200	22780	18736	46000	42720	49120	59240	49040	38480	85880	76880	85440	50560	52160	66080	81280	76760	73160	77440	62600	53840	113520	89640	124880	74520	86840	78280	54480	42240	52400	94880
901300
851630
878260
925580
884350
858740
875680
836940
positive control	LDN192960			1			2			3			4			5			6			7			8			9			10			11			12			13			14			15			16
982840	1193120	1091680	1159200	1080560	820040	984920	788600	988960	948960	1078320	848480	820680	860440	962480	908240	850000	980040	827840	976520	835440	992400	794920	955880	775040	1080560	1137320	1007600	1091560	1097320	1227720	1212680	1125720	1213680	1128040	1198480	1089560	1167280	1099400	1183720	1043480	1096240	964160	1046160	890720	958760	1072280	1185960	962600	894160
1086580	1202560	1097600	1202280	889280	901440	1075100	1085200	925720	829200	937520	863240	1000000	886720	1032480	896720	987280	858920	1009400	887200	999640	845480	1013360	815840	941800	889280	831280	942840	901880	980400	958880	981320	1083840	1031880	1125360	1043720	1128600	1054160	1144680	1038080	841480	808000	859320	890600	833880	956960	942840	1074960	876840	797560
1147320	1172520	1084440	1167600	1028120	754360	794680	896360	822520	744200	880120	953920	749400	878920	906160	972040	818080	938840	816560	976120	856560	1010800	840400	899640	753640	1028120	1112440	985000	1020040	953480	1132320	1194520	1069360	1136920	1057880	1097120	974920	1112200	1030920	1084520	884920	961240	865080	953280	791680	876680	994240	1138320	1020840	823680
1283960	926400	1078720	974840	796480	667280	750840	774160	718480	654760	776280	856880	826040	793160	821200	787080	979440	825360	989400	744760	754880	781080	774760	762040	657720	546480	768960	893360	825320	919640	851760	845880	970440	879000	1026800	943800	1047760	944320	1058600	940960	1033840	838400	941400	786800	756840	717760	988520	963680	1171600	775520
1054890	375120	467000	406880	631480	578720	624150	660400	637560	581440	574680	665360	618360	659720	625920	676360	710880	789720	691320	463360	439920	356000	435200	459560	416360	371480	1025160	880280	937200	892440	1052640	925760	817760	881360	830200	910040	817400	876840	782120	833080	698080	773560	669440	722480	687560	640440	825560	752120	970560	448680
1292120	140240	107680	138480	270280	280360	341680	292680	314280	313560	233480	231600	257160	334440	256200	242400	302440	269360	316440	118960	117800	119680	260000	240160	265320	70280	631360	749880	675080	735360	683800	394040	443600	396360	505480	447760	517760	379960	430200	369520	427440	378200	418600	522200	539800	434880	507440	607240	624120	185160
1157890	118280	125480	123120	193200	187960	164860	215680	174760	175680	167040	197640	173920	207440	191160	199320	165720	182760	163440	80440	90950	110120	137480	144480	122920	193200	597640	542080	218200	243080	116480	237080	195360	208000	229080	245960	204120	211280	189760	199640	191600	206080	206880	204200	155440	157960	215840	228640	271240	154960
1242850	91600	102800	86520	54040	71720	49570	65560	76080	74240	83600	80320	96560	86880	100360	102640	112920	99040	118760	10960	10780	10620	126400	115200	134680	54040	135520	163200	99920	116480	95240	90080	108800	142800	159240	164360	155000	126320	130960	166280	193560	199680	179560	74520	82360	75680	54280	42240	52040	78120
1196310
1143720
1257850
1231440
1275130
1156690
1262040
1154820
Compounds against DYRK1A data
positive control	LDN192960			1			2			3			4			5			6			7			8			9			10			11			12			13			14			15			16
796160	898280	906120	808760	783920	921960	733680	846400	739400	847240	705520	820800	795120	888960	716640	823000	682320	800520	680000	791200	670640	757520	753120	826650	737410	913160	812480	821400	764360	837320	756160	863680	781680	853120	758800	825120	746240	790200	699000	809840	681720	729080	657560	897360	773400	902240	904360	699120	828480	856920
844360	917480	907120	809800	891480	746280	703000	597480	707640	618240	723000	838640	764680	650720	761760	645720	737160	654000	767720	660640	750440	632920	689160	762440	598640	682440	727240	762600	736400	718360	722520	736120	745400	717360	776960	754200	766200	705680	733320	788120	655440	604520	658280	898680	805600	858680	698560	792600	882640	796510
888960	803240	795120	813480	774880	823880	765640	919760	742200	811520	752760	890600	776000	896280	750680	858320	763920	883360	753240	869600	728960	822400	766240	621200	755080	942400	786800	828480	733600	870840	753080	872640	736520	854880	736640	842960	726840	820280	699080	766120	633760	785480	626960	756840	831000	741240	780560	793720	834960	618720
853120	784440	787320	814120	796720	728440	714680	744920	770840	766400	779600	714840	697240	709920	709680	653880	747360	691880	742720	752040	764920	691680	750920	749160	714360	610200	715000	621280	730520	632040	748040	731800	745920	629560	736200	653400	772080	658840	702120	642880	718320	611640	704880	675600	685320	683200	775600	855320	683200	697760
837320	770280	867440	768600	657720	684080	601560	722160	713840	674360	639760	675720	641280	642040	636400	689160	783360	795320	671560	592520	654720	490600	736800	761200	674520	860320	714640	783120	703520	808320	689680	781200	717120	777960	680520	771240	655680	747600	636920	700480	610560	684520	591040	683040	611040	685600	683040	791040	885600	652840
863680	569840	521200	484160	333120	400800	314640	378040	329120	363440	463320	494600	426400	468160	460000	376120	442800	396520	453920	458080	485640	488720	596400	539480	566560	530320	629520	536000	683640	609640	677960	593720	685360	602240	657080	586600	680480	570360	643720	551200	669080	578320	650600	475360	473400	402240	897360	773400	702240	546920
842480	129680	172960	184640	178920	205920	196360	116000	93280	102200	191640	210320	140280	206120	187160	203600	147960	181120	153400	165800	151920	122530	260000	335160	277480	594720	430040	498560	494440	418760	401600	569240	523520	511000	425200	521080	429400	477360	443800	534760	369680	392560	342200	298680	205600	258680	498680	555600	587680	367200
922010	80520	70040	81520	52440	42640	54960	54280	56040	52960	62920	59120	62880	63360	63280	58720	70120	61520	74720	71080	78190	65400	71040	78600	66480	149240	175120	152760	174480	161120	181640	359200	428280	346280	267160	230240	265400	292960	275080	226800	341240	273120	365560	56840	53100	64140	156840	131000	141240	154520
892800
914600
801680
828800
795200
835120
860800
849840
positive control	LDN192960			1			2			3			4			5			6			7			8			9			10			11			12			13			14			15			16
1098840	1293120	1191680	1259200	973250	1172400	1224300	1178880	1078280	1127680	1017240	1217800	1151800	1112960	955240	1159280	1008720	1147280	993440	1111840	956200	1097480	1085200	1172880	1084680	1233560	1095960	1201320	1143320	1245320	1235760	1365040	1270760	1360880	1270360	1337360	1188480	1266920	1148200	1273320	1113040	1147640	1087760	1057440	896360	1057200	1266400	9700280	1348360	1025720
1182260	1202560	1197600	1082280	881920	987040	1086700	1013240	1154440	1056000	1163160	1076720	1229800	989240	1084680	909720	1089240	945000	1130440	1029480	1194360	1003840	985120	1083800	911280	810120	868120	842920	931680	912440	999760	918840	1038800	993080	1061760	1009360	1104560	1056760	1121680	1086240	1022840	978800	1167440	1048120	1042400	1013000	951800	1115480	1075000	1038120
1265620	1172520	1284440	1267600	864730	1057520	1168450	1184600	1095760	1194560	1071200	1299240	1213600	1220080	1061720	1229320	1035720	1217280	1052600	1221600	1010600	1157320	1125520	961080	1119760	1257640	1044600	1165920	1029320	1235400	1133160	1329800	1157240	1275760	1123000	1284120	1118800	1256560	1086120	1215680	1030200	1157280	1022040	1014440	919040	991320	1068640	1174560	1098000	1070760
1306520	1166400	1078720	1274840	892550	994400	877320	944520	1101000	994880	1141600	1019280	1168560	933040	1007360	944520	1085000	950080	1218400	934360	1090360	1011240	982040	1119160	949800	882760	936440	806040	954440	868360	1020880	907520	1084160	937520	1050760	965960	1134560	961440	1115360	1009880	1149400	1008320	1178480	892120	842240	955080	956560	1162320	1172080	922760
1261280	1025120	1127000	1036880	853900	923720	973900	872720	971680	936080	905720	853600	985360	886760	895680	946600	1035400	1169840	1025480	854560	812360	853000	1026280	882040	1034120	1155160	949040	1075080	952800	1150880	1099840	1271120	1094640	1222800	1063600	1196800	1058040	1185400	1047360	1145200	983520	1110720	981000	932720	859000	878600	961880	842200	1129240	925440
1348450	858240	897680	808480	691580	769560	750910	675320	724400	713520	668080	637760	691880	698480	776840	681840	657680	587760	686080	746600	685000	698400	899200	821120	795400	785520	832320	825760	926000	1043840	947920	845720	978480	852560	983560	862920	987560	850040	968440	856800	978240	861760	1011080	700360	750520	759120	1095680	851640	807680	718000
1368040	188280	275480	183120	319120	403400	397570	298280	283920	193920	288440	389320	362240	356480	409960	407880	192440	228440	197840	554720	446560	430720	640080	706760	626760	792400	593440	664560	691600	784080	672440	699520	562760	684200	559600	693640	566280	677920	598040	666080	538920	590840	473240	482440	466760	467720	717000	797520	688360	579240
1324530	91600	102800	96520	100800	109120	83680	54600	60960	65720	68320	61120	74280	165560	170640	162720	80520	71760	89360	118120	108200	107440	78760	91640	74840	330760	308840	240440	232760	281600	184240	553400	680840	561400	442920	374640	517960	337160	385680	346760	535920	500480	628800	185000	202920	203640	616480	450800	433760	296320
1335040
1275400
1356240
1297640
1249640
1277090
1056840
1179600
Compounds against DYRK1B data
positive control	LDN192960			1			2			3			4			5			6			7			8			9			10			11			12			13			14			15			16
1044880	1090920	1205600	1248000	1066600	1023240	897240	1082040	1072680	956240	1021840	1002440	952560	1000760	958120	1036360	950120	1011080	937560	980680	921320	971200	914000	949160	904520	1111040	1162680	1051120	1137920	1088520	1078840	1001720	1239160	1093800	1061640	1056760	1157200	1027960	997600	1012600	1063080	964000	1035840	1074520	1012640	985400	942160	1044880	1001840	1001840
1053200	1095840	1015800	1023360	912000	872920	858400	1037680	1037720	1043280	979520	1023840	998240	1036560	1032000	972120	903880	855160	1008800	1155520	936000	875240	1050040	1080360	937840	883240	911440	1017040	962440	935840	945400	1071200	965480	978880	995800	992080	965200	969000	971160	1056200	856440	912360	865960	857200	963520	850680	990080	973840	1123960	885120
1101540	1081200	1103960	975200	1058800	1058440	985840	1067440	931520	1014480	1038120	1073600	959960	1006240	951200	1032400	980280	1005440	940320	1002040	942200	1000800	979760	921320	1062840	1112680	1014640	1025760	982400	1050240	1035200	1091120	1025520	1061000	993080	1022120	967560	1022200	969440	1001720	907560	942920	887160	1173040	1072400	1073240	1110560	994800	1004560	1041240
1035750	1018760	987720	988280	996200	1076600	1075760	1002480	1019560	987160	1043040	998120	1062960	998360	1039200	1001160	911280	985040	946480	898120	936640	981560	988400	959760	1098120	830360	877360	855520	900360	883400	929560	918280	949360	912600	976800	937640	1027600	928240	958440	906160	920160	869840	910920	824920	875360	868560	998720	1166600	1026000	813960
1012980	915960	1029880	959600	792120	871000	879880	888840	965840	924320	973360	1005480	894680	918640	960640	877040	832960	965040	1022560	978280	1130040	979280	1050920	1007760	929200	1070840	991400	1017000	978920	1053680	1011760	990760	944720	977320	926400	982880	910280	960000	885120	917600	948440	872520	831320	1069960	901480	886000	902960	1161080	1070480	895040
1033960	688480	763480	794760	673800	658960	665880	682520	550560	650960	799760	711600	683240	631080	576360	700160	813280	790880	820240	386680	340400	409920	786400	811280	720400	900320	832800	816200	904080	893440	903120	847880	871240	752680	838480	881360	896680	849000	777080	843280	762360	655240	647920	894200	910320	903880	829800	1063360	920200	693840
1002210	276720	287800	216520	126120	113560	93720	105160	82520	105160	313680	200160	187120	98000	80080	96640	289760	297400	279720	152360	121000	246960	69000	78240	65680	367320	420120	350680	487680	449120	474280	706400	644080	608640	460200	300000	222400	639920	562120	497840	443840	509200	354720	348880	217560	132560	801120	720520	695480	412000
1021860	89080	89520	88600	103680	85640	80600	59480	54000	63760	57960	53320	92080	57480	63680	55320	70320	60120	68000	96400	102240	110320	69280	58120	74240	72400	71440	80280	72320	85360	90020	437920	497440	463040	90240	120080	82520	134640	79240	93720	89320	79560	88280	112320	80600	66600	149080	223160	142760	81840
1001840
1052920
1032940
1001840
1017770
1112600
1079320
1027540
positive control	LDN192960			1			2			3			4			5			6			7			8			9			10			11			12			13			14			15			16
758960	804640	891000	808880	722120	897960	704640	914160	822720	869280	795040	871440	791720	870320	902960	777840	920280	870080	797040	845760	799720	855960	907840	865640	797960	902320	768520	833240	799640	860640	835720	915920	770320	844440	883240	811520	785640	821520	775920	814120	861000	847200	781920	858960	787120	799240	758800	859040	780600	762480
722120	803480	809880	791200	821440	821360	781880	870880	823360	779200	825000	890080	760440	850440	901320	842440	858200	799680	868640	940760	872920	881240	918160	800600	873480	808600	840840	832200	797320	892200	839200	857200	794040	811240	851280	798040	819400	809440	804000	753400	797680	800200	809920	848320	807680	751040	840240	811480	784520	860280
857200	876200	774640	781360	888200	921880	687480	808960	885160	779920	796960	851080	797960	749720	837320	815720	760760	813880	753840	870600	884840	743200	839320	720120	788280	817880	817560	798040	783360	701720	912640	806640	847960	777040	790640	848840	801280	833840	886920	739440	830400	878920	717680	826000	813440	755320	859000	779680	873360	814840
798120	773840	793560	882040	714880	743120	650840	833440	798280	859320	742440	824600	821280	752000	813600	750400	893160	828960	881840	829360	882760	709200	751960	809400	846240	752960	797800	837520	841160	807800	886920	855440	735840	796160	866800	804520	768120	893880	738680	857000	864720	816640	746360	775920	823840	775720	844240	789800	778400	840720
889840	697880	799000	783200	690320	614760	588200	800640	745680	751320	843920	882440	807000	793400	739360	802480	714840	909720	818480	782320	739600	710440	835320	841680	718520	810320	843160	765720	800160	728240	730600	799720	845240	867640	826040	766720	729640	839360	791520	824320	762960	791440	838760	754560	847080	826760	712400	863520	715000	778640
922120	602080	629160	522320	523320	533000	617280	488560	381640	493200	553200	593720	507280	531200	401320	508840	651920	663240	656200	228400	351120	294000	504200	590840	501800	695880	751280	651840	801440	721480	780920	718760	746360	727880	586280	648320	580840	717840	750960	713480	468760	501800	463160	633120	562000	504760	798680	712200	770320	454040
821440	229840	226840	232680	194640	128760	96040	211040	188360	192640	188960	201920	194560	112520	94360	113360	192840	208680	195560	104880	139760	168480	180320	193200	174600	295680	281000	341680	306120	321800	386680	555800	552360	516960	235880	340200	338440	404880	338040	329520	142320	213240	309880	211840	369640	275240	454080	563440	563920	214720
881200	72400	78520	82200	99840	62520	65560	54320	66480	55480	70040	61880	69920	65520	76240	73360	84040	75560	81840	92200	86800	83320	85800	79520	83120	240560	120000	248040	127600	121160	131880	380160	313520	367440	171440	273760	110600	122480	101560	111960	119800	311480	130520	89840	115080	103400	200920	184040	212760	109600
828120
809280
835240
898360
879080
903160
792520
819080
Compounds against DYRK3 data
positive control	LDN192960			1			2			3			4			5			6			7			8			9			10			11			12			13			14			15			16
1177600	1162400	1186800	1163200	1043760	1243240	785200	907320	706920	774480	780680	941360	762360	997000	865240	1015640	848080	1048560	911080	1030880	979720	1159040	951200	1124280	866480	1082480	863600	928360	1264160	1078120	990880	1144400	1057160	1175120	1148920	1267760	1060480	1183160	1065920	1199000	1000440	1088720	1042040	967600	785280	834840	1254880	1096280	924800	1034240
1285690	1288560	1188040	1189000	1088640	1112960	975520	883320	1047080	887200	1035560	935480	1110560	962160	1098760	861960	1061120	926200	1126000	1008600	1133800	956680	1103840	884200	1096400	1214520	1326800	1224960	1225880	1124760	1216440	1095240	1239040	1092000	1336480	1125640	1217200	1090160	1210840	1088720	1016440	935640	1031080	901760	1064840	898200	1057320	909320	1131080	951120
1184530	966480	985800	1078360	882120	970800	853040	997160	786680	877920	828440	1028600	873960	1085280	920240	1112040	930640	1116320	952760	1139680	941640	1127560	878120	1054360	853440	1177600	934640	1068280	1026200	1198560	969320	1156840	1026880	1267680	1115840	1195520	1106240	1198440	1038120	1196920	998840	1268120	1001880	1046240	849760	961760	860640	1061960	1292640	1078680
1247680	942240	808600	904840	873400	935520	867840	808320	1013440	839160	1027360	857400	1036320	850640	1056400	865360	1077760	915200	1111200	969080	1122440	901080	746720	696080	773320	989080	1136560	1066320	1242000	1077880	1189280	1006800	1164800	1059120	1243640	1038720	1204480	1033240	1158840	1025440	1123960	987240	1123040	942600	1027200	860800	1059480	868440	1117160	786480
1300570	322120	308740	221520	680120	774480	755160	772960	609800	615400	815480	771400	768120	791200	719960	680800	833000	977640	861200	675320	796240	681840	565840	515960	577800	1024160	845920	951240	891880	1043360	945480	948480	842880	980880	1052800	1120560	988640	1063920	910480	1040640	926400	1068200	901120	818560	645440	704280	908240	1073560	1008520	502040
1336800	104840	114560	106680	456360	456880	464120	562840	558440	588440	437680	408320	439520	523040	615960	487280	479560	437560	508200	207240	121760	207920	216760	297760	217080	898520	1059160	920400	587680	591240	437240	375360	463240	386840	852400	724480	860840	546440	624840	516840	760680	641200	752440	318880	380200	330200	525160	492960	446440	153280
1247500	70000	84760	80960	254920	215080	208600	312880	388120	393680	386640	307200	290440	380800	290680	301360	132400	161680	141040	126440	106560	123640	167400	171720	166640	801600	545920	686200	120240	179920	184040	202720	100280	183840	324520	413800	319160	270040	200560	233560	309160	344840	281880	185760	167040	161160	148160	114680	100440	110080
1288500	42120	47520	44040	121400	48920	48640	48160	53520	49120	55600	52320	55240	149520	160680	152480	68200	60840	71600	51230	64040	51320	61720	50320	56160	218640	261800	234560	112280	104240	119200	88520	97320	98680	191080	121960	141080	107960	110920	103840	123160	119960	213280	64680	81120	68480	62280	53600	63360	62000
1233260
1274630
1257900
1216800
1158200
1234650
1210500
1206420
1226100
1198100
positive control	LDN192960			1			2			3			4			5			6			7			8			9			10			11			12			13			14			15			16
1085120	1178500	1078480	1167620	976240	1223600	876120	1124480	816800	870000	831920	1017480	904320	1033080	888200	1017800	863280	1028720	868440	1029600	937040	880800	979840	1063480	1027920	1213200	1004440	1081480	1053680	1163640	1097480	1195120	1116880	1214040	1099240	1212120	1064280	1182480	929600	909040	956080	1048400	1037520	940480	884160	821000	1124120	1098680	1251280	1058000
1127250	1208640	1016680	1026840	1015520	987600	909720	913920	918720	774280	931480	804640	956120	824960	970840	825280	958640	815240	966760	879320	882640	727840	937200	891720	988280	900840	998360	918080	1240720	994800	1090440	984680	1108440	1014160	1117960	1026560	1110480	1038280	1002120	908640	920320	912960	971920	1000600	933400	971920	1203600	880920	997280	1053200
1155600	1096680	981300	995480	962120	1093560	936040	1194600	868880	973000	903560	1109240	966080	1122920	948080	1114680	928720	1107600	931320	1068720	981680	857000	956680	922960	832000	1204440	948840	1003640	998800	1152920	1144480	1156480	1061760	1152200	1028240	1136880	1008040	1124000	907520	936440	908640	955600	967320	902280	956200	991240	1135600	994240	1111560	908920
1223280	806120	681320	704200	832080	856920	823880	826280	924840	869560	847040	814200	957080	853760	948640	791240	1010760	855440	1011280	926200	901160	968760	859060	841200	792560	859160	995000	884840	1010880	922080	1045080	910440	1045760	929000	1073440	943360	1075120	957880	988360	827600	972400	979960	860080	921600	960640	854240	970640	1055520	1154120	804720
1165240	261160	227160	202280	612960	645800	577640	743000	642480	626480	661240	725800	715000	786360	705000	780800	809360	941600	807200	714840	756920	810440	469400	379120	373520	1115840	885200	970000	999640	1082280	976120	927600	825600	944960	918920	1043640	921440	962760	684120	710520	923160	964360	885600	748400	656600	678800	873240	872480	827240	490640
1139100	127560	111760	90280	311600	391520	302040	233800	266200	250360	403080	379320	417880	393080	500880	422240	406920	355960	426240	199270	186540	167840	117320	100160	122800	769320	897640	783960	521440	359080	460360	330880	393480	338160	672200	573920	684480	443680	443200	362720	731000	632800	675920	247840	257040	210120	423000	424400	398080	213800
1145880	68600	60520	58120	270640	182440	201160	230360	174520	192280	274840	195520	267680	188280	158320	169480	171680	193000	165480	64500	63680	65800	90440	97520	79880	784640	565000	627880	146240	111440	191680	194480	144920	151040	297960	309600	297120	203480	149400	178000	245600	273160	253760	177480	136480	151640	268480	142920	279480	137400
1205030	43080	42440	43360	81520	51600	55080	47960	57040	51960	62480	56880	77120	59120	70240	64800	76240	70080	85600	47560	50560	40130	84080	72840	88000	173560	261160	186920	98600	94800	106560	108360	136400	169280	166560	183920	160520	161680	141120	109000	146920	127800	144080	68280	76920	70840	72420	88680	85280	72720
1233100
1145000
1177120
1149660
1067280
1135430
1129800
1137250
Compounds against Haspin data
positive control	LDN192960			1			2			3			4			5			6			7			8			9			10			11			12			13			14			15			16
1177720	1197400	1181520	1201320	1738480	1595640	1207880	1509960	1996880	1982480	1173440	731720	1293680	1108720	854800	1114760	1061640	976960	1232760	1049360	1260360	1179400	1163600	1020920	960000	1047640	975040	884920	949960	1059520	1255080	1094600	1168080	1196800	1165200	1061080	1242760	1072840	1108000	1217840	1251480	839240	1004280	1000720	1203720	972200	938920	1081240	1084880	1168840
1159360	1189320	1202280	1184880	1277080	887040	940160	608480	700760	652080	999360	1198760	811320	935040	1262520	1189040	1163320	1004720	1267520	950920	1007200	1212160	1258280	1081600	981040	1120640	794000	1093000	1069240	988760	1116600	1206240	839520	1239680	1250880	1075880	911840	1031600	1084320	1020120	1178040	903520	856760	984360	1220000	1177080	874440	1050800	918240	998000
1155520	1093800	982280	1086840	1236800	1124160	1540680	1256280	931760	1547240	1329440	952320	684680	796520	713160	1103720	1043880	965240	1133440	1125480	1206040	1109360	1248760	996440	1049040	1096600	1179520	1192600	1224120	901960	1212160	1051200	1172440	935160	1126960	978640	1216440	1167520	1038560	921600	981720	1064720	860680	950560	1153440	1162000	890680	949880	923760	1112640
1229320	820480	866760	849040	1095800	741400	899680	777600	972080	712880	797840	591080	666480	910760	748600	930080	980680	875640	1176040	1017720	988480	1147760	955880	1075120	972680	914240	940280	793000	1127850	892800	1066200	982120	1188360	1013520	1107040	1050520	834840	749720	942680	882320	873480	1017400	1264400	1007680	936640	1014400	1182840	901600	848400	1198720
1284440	209800	107240	226600	316280	305400	220600	334400	310320	297720	566560	553760	489160	432200	543640	463120	408280	417920	415840	405960	339880	311360	668640	489240	441840	962920	831960	868960	939720	971240	909880	684440	649720	623360	949840	939520	893600	816680	753280	887840	1002840	948520	922200	939200	842560	1010440	1204600	1228280	1149000	830040
1236320	143680	131120	128320	173280	126400	159360	166880	187800	165640	208720	158080	195840	154680	196200	170880	203360	200120	267440	154960	120360	179400	149720	130640	161360	317200	335320	373200	522160	685480	566680	301960	339720	338680	798440	814520	874520	569960	580600	506520	716280	774480	852720	349280	328680	372920	780480	877520	1063200	414840
1141240	61960	63200	55760	125000	109800	129520	152760	189960	158760	143680	126320	108520	112560	112200	119840	118120	141240	136320	73380	100720	121160	103760	111160	115560	362280	294240	277880	210040	286840	198320	128800	119880	157440	342320	223240	381440	415320	329360	341840	447880	364560	356840	196360	161280	156280	997000	677160	1093680	236720
1167240	44440	49640	45960	67480	95480	60400	130040	163920	111720	126200	116680	119240	94640	105640	103360	121600	115080	126560	76880	90960	63560	115360	92160	103200	131480	221800	241720	49560	66280	80240	104960	137600	172120	155360	149800	109160	507880	206600	680360	121400	214480	176320	127120	151080	133920	100400	92440	105360	94240
1338480
1327780
1236800
1095800
1236280
1273280
1295000
1267480
positive control	LDN192960			1			2			3			4			5			6			7			8			9			10			11			12			13			14			15			16
886320	903880	909560	814200	839240	938480	797720	923680	869280	794960	822640	856320	774040	730520	616760	805040	857600	792400	695200	725720	922040	804760	887800	974400	740240	919640	888040	864800	722040	793320	916080	806400	726000	934040	826120	812520	773520	840040	768000	741520	902800	786920	822520	891280	771520	720960	647960	753720	919680	860760
796540	819680	834880	819440	903520	777080	859360	772520	834640	682480	812720	772640	892720	784000	741600	776160	765880	881560	905360	744200	850320	804280	844080	758120	690960	886880	841480	701520	862240	748160	736800	850480	794920	736680	762360	8884160	735520	828880	784520	731040	805560	827480	734200	869040	705920	830400	732840	852920	992160	826440
842530	821360	810200	816520	764720	836800	755520	1033440	885760	799440	805040	940400	777320	909160	855800	719720	970800	720520	829560	820080	781680	621120	803600	756360	803320	764360	804200	796960	800920	795800	729680	860800	750760	762320	874520	705400	759000	761400	719040	882920	685320	800440	826280	796800	799440	817800	729480	854000	781240	701800
830780	509080	425080	503160	817400	795800	629320	620240	572080	696840	630000	620680	686720	520520	606160	547880	818920	819160	669160	678680	628360	719000	650720	764080	711840	779560	741480	826400	712120	716160	682240	771920	707120	848160	729560	725240	701760	792120	783200	758640	856840	755960	604760	679240	686560	808200	885600	817760	887560	762680
935460	193880	198120	188600	208520	116280	224440	209920	135280	118080	128360	173560	143120	372480	256480	248880	255640	230560	332440	363240	244920	295440	280120	269600	378680	635160	654480	611480	850640	637120	819360	518040	478440	471760	584200	591120	640600	735360	676240	776200	696560	757680	691640	767040	494560	497000	695960	923320	767720	365920
892440	146960	141080	122680	124480	103280	136320	141800	109440	107920	75440	82440	104240	185160	116840	123400	46300	55520	44960	137200	128240	131200	163760	190800	168640	266760	205400	241960	344320	425600	404640	226760	210480	205000	585600	503640	483240	471360	495840	560680	513960	498440	557840	236120	294200	282800	688840	670080	552520	122560
965500	62040	59200	65320	36460	39500	11240	15580	12000	14160	42600	52800	65840	44320	67890	32330	14680	16100	12800	47480	66160	42480	108080	130280	113040	152800	132600	157080	105120	139440	122480	126240	167720	154800	236280	306760	315960	137280	116960	142880	268280	243960	301000	191720	149720	149960	566800	688400	531200	102760
861430	43800	45040	43920	21480	16480	11640	11520	13160	12140	46160	21400	31160	18720	13840	11720	13340	11280	13940	34960	53220	41120	51160	74320	68780	64440	54440	65560	86360	77400	67840	75280	92040	74480	49880	62440	60800	63560	69320	45600	34200	46280	63200	72880	83560	47600	202200	191480	237280	79600
855040
787110
939020
848580
878320
944500
936510
844260
Compounds against MARK3 data
positive control	LDN192960			1			2			3			4			5			6			7			8			9			10			11			12			13			14			15			16
1077720	1191680	1152560	1226800	1045630	974630	885290	1009960	1196880	982480	1163790	945320	882530	1291200	1008450	1046840	1430400	1151720	980400	1068440	1145520	949000	1038560	1243400	843800	960720	992740	1337520	1264400	1037520	924840	1148560	1056920	949040	1061840	946360	959480	1144000	944000	1057480	1241320	940880	1044280	1245480	941120	946080	941360	1333600	1164480	1153640
1059360	1207040	1038720	1180600	1168500	842490	912500	1108480	900760	952080	1108560	827450	926510	1071840	916320	905600	945240	1057200	1147200	1254400	1243440	942360	1148800	1042280	950680	1075840	876800	1163560	944000	1407120	1158080	1044360	944720	841120	1243080	941560	1045920	1042160	956080	976000	1326080	961160	1141840	1042840	979280	1174440	945080	944880	1237360	948520
1150520	977560	1016920	1026920	938620	1085620	965470	1256280	931760	947240	987650	1056330	952490	969960	937000	1036520	1028200	931680	1131520	1139000	936200	939160	1035000	1052040	895960	974840	1006112	1071240	913040	1140570	865640	1148720	1079400	953280	965000	1141000	1146480	1244720	1060920	951040	977600	1141920	1038480	1243480	990400	943080	1039440	1140600	951200	1062880
1203620	960500	1012240	969200	1002840	896840	983240	775320	985150	732610	1100400	868700	985460	837000	945600	933120	834000	1128200	936960	739880	840640	936200	839320	936320	1237600	928640	1035320	934640	947000	1047280	1062560	1042760	942240	841200	943880	1038120	942280	1038360	1141000	937760	841600	940680	1041640	833640	938600	835280	937720	862700	1029360	844840
1214440	932160	887600	832920	274120	228400	318650	234400	315210	278740	251270	284100	226360	698880	658360	539920	529160	630840	530800	640880	640040	738800	532640	636120	534520	936120	948400	908720	1116920	1024760	857880	939040	839760	847400	865440	852560	832280	835400	735280	937040	735240	834880	875680	782200	829360	692160	961360	1032600	924920	790040
1116320	464440	580440	547560	124810	101930	136780	166880	187800	165640	148510	129330	163840	173720	238960	286920	126400	196750	138860	239520	143920	237320	230720	230280	335600	729080	630320	642160	879720	969240	838090	531120	383320	461320	439680	458920	630800	728440	790560	628840	433720	425960	352070	328480	429680	280520	730760	681480	726080	240200
1161240	200800	98040	110800	72480	68400	54560	153650	181170	157320	74680	68650	57360	92060	101320	84720	47400	35280	48800	40760	37960	39120	28080	29280	26840	429880	371160	438840	269520	261440	323680	131600	128000	118680	131000	131560	127440	130560	231080	135280	244760	131960	299420	130080	128760	131240	128000	136760	142480	44960
1086350	69600	62160	68640	67400	57830	58800	114560	132290	117230	64500	58230	52450	28320	34360	29640	35680	29240	35720	38000	38800	35160	30680	28600	31200	26880	29320	26920	85040	92120	76720	112720	101960	194960	176160	174640	53000	29280	32640	30120	33000	29120	33680	29240	33080	33520	93120	86120	94060	14880
1038480
1227780
1156800
1065800
1236280
1233280
1205700
1174580
positive control	LDN192960			1			2			3			4			5			6			7			8			9			10			11			12			13			14			15			16
763520	826240	861680	783440	893520	742320	779280	728640	881120	791600	926120	777200	899480	761280	933600	799560	936680	769320	917400	746800	876600	751960	878040	798080	907400	915560	754920	785160	864400	737520	924840	875120	725760	779440	804320	742640	900800	844200	786840	837200	859480	828560	771440	824280	799720	846960	808120	796600	917120	851240
736410	851640	875960	852760	797360	952000	814800	799520	703000	834560	855080	919880	827000	966360	810080	988160	831640	983440	838880	966640	820120	949800	890240	813440	835680	764400	787520	833840	744000	807120	658080	744960	770800	839400	868600	841960	754800	803560	915480	773000	902680	927080	733960	902520	755600	807360	761200	718040	899760	708520
842530	805280	847120	743600	969240	744360	892840	763600	871520	790680	799000	848000	978720	735400	934160	773880	976040	843560	972720	822440	936760	781200	765130	684500	753520	842320	796560	660880	913040	840570	825640	841960	729520	916080	742360	918800	818240	900200	774600	836000	803080	777360	675280	912040	790680	723440	836850	766860	777080	752600
830780	810960	863160	796040	755320	642560	797280	652190	503480	612580	611360	553640	483440	749160	656760	754120	710560	635720	772280	693680	554600	729280	713440	829480	623360	815760	750640	885160	757050	817830	765460	748200	861280	838640	869800	744480	820920	843120	772440	924760	695000	735040	866840	742680	777680	817520	854400	727560	762840	773880
904260	581880	665120	625160	157560	124000	130560	125320	244920	129160	220000	224200	175040	416000	356960	488640	426840	345160	412760	424400	419320	461000	455560	426920	315120	638960	734040	638200	816590	723650	817880	670720	701520	560200	589320	629000	476160	759040	696480	746840	661200	563400	562280	597040	539320	597520	714000	699320	871360	519640
832500	401480	369240	348360	81800	80520	72760	51360	45920	53280	122240	109520	120240	85760	77720	90280	124040	116680	146480	109520	197320	124600	194680	181160	179760	577560	568480	463800	677520	740430	760790	361480	258120	295880	401040	316240	308400	509820	405000	457200	254280	354200	248400	178160	164360	152880	452400	375800	407160	125800
915880	101560	100640	92400	101200	104600	99320	87160	90320	73280	91080	76440	82040	76400	75200	63840	92160	76080	77080	71000	75560	61600	54640	58960	49800	192360	181800	181040	195620	163140	126810	82200	78840	76400	247960	157800	220720	74320	73760	63920	62680	67720	60560	47240	37560	44360	152360	141760	137480	53440
841430	86800	78800	74840	39880	41240	38520	46320	43240	49000	50800	55240	52720	72880	53360	58720	51720	57440	52000	59880	55120	63400	62040	54480	64200	36600	34560	34960	85040	79120	76720	37800	32440	38080	35120	40840	49520	77600	70960	95880	73040	47520	53840	46560	41720	37720	66720	73840	84360	50200
815040
721510
924020
848580
838320
914760
936510
824650
[truncated: 21 more columns]
